# Supplementary material for: Co-expression network and comparative transcriptome analysis for fiber initiation and elongation reveal genetic differences in two lines from upland cotton CCRI70 RIL population
Source: PeerJ. 2021 Jul 21;9:e11812. doi: 10.7717/peerj.11812 (PMC8308610; doi:10.7717/peerj.11812)
Supplement: Supplemental Information 1 [file peerj-09-11812-s001.xlsx]

## Sheet: Sheet1
Table S1. Phenotypic data of two lines in 5 environments
Sample	Environment	Year	Location	Lint Percentage (%)	Fiber Length (mm)
L1	15AY	2015	Anyang	34.0632	33.5
L1	16AY	2016	Anyang	33.2605	32.1
L1	16CD	2016	Changde	30.3149	32.8
L1	15LQ	2015	Linqing	35.776	32.3
L1	16LQ	2016	Linqing	33.7591	32.9
L2	15AY	2015	Anyang	46.1072	26.9
L2	16AY	2016	Anyang	40.5096	26.55
L2	16CD	2016	Changde	38.0745	27.7
L2	15LQ	2015	Linqing	45.7662	25.85
L2	16LQ	2016	Linqing	41.6059	28.6
sGK156	15AY	2015	Anyang	39.1929	28.2
sGK156	16AY	2016	Anyang	39.7594	29.7
sGK156	16CD	2016	Changde	35.5214	31.2
sGK156	15LQ	2015	Linqing	43.076	30.25
sGK156	16LQ	2016	Linqing	39.5131	31.2
901-001	15AY	2015	Anyang	36.5281	30.5
901-001	16AY	2016	Anyang	34.9507	30.45
901-001	16CD	2016	Changde	31.5209	31.7
901-001	15LQ	2015	Linqing	37.091	32.4
901-001	16LQ	2016	Linqing	34.1097	31.25
