# Supplementary material for: Co-expression network and comparative transcriptome analysis for fiber initiation and elongation reveal genetic differences in two lines from upland cotton CCRI70 RIL population
Source: PeerJ. 2021 Jul 21;9:e11812. doi: 10.7717/peerj.11812 (PMC8308610; doi:10.7717/peerj.11812)
Supplement: Supplemental Information 3 [file peerj-09-11812-s003.xlsx]

## Sheet: Sheet1
Table S3. The Pearson correlationship coefficient among each samples
	L1_-3DPA_1	L1_-3DPA_2	L1_-3DPA_3	L2_-3DPA_1	L2_-3DPA_2	L2_-3DPA_3	L1_0DPA_1	L1_0DPA_2	L1_0DPA_3	L2_0DPA_1	L2_0DPA_2	L2_0DPA_3	L1_5DPA_1	L1_5DPA_2	L1_5DPA_3	L2_5DPA_1	L2_5DPA_2	L2_5DPA_3	L1_10DPA_1	L1_10DPA_2	L1_10DPA_3	L2_10DPA_1	L2_10DPA_2	L2_10DPA_3
L1_-3DPA_1	1	0.886144	0.89338	0.915632	0.846068	0.909161	0.848196	0.802491	0.774408	0.855766	0.826807	0.777357	0.388028	0.409225	0.365488	0.408955	0.374013	0.324404	0.333413	0.335933	0.25873	0.312954	0.33547	0.28975
L1_-3DPA_2	0.886144	1	0.943119	0.873346	0.921353	0.916212	0.877015	0.847446	0.815218	0.806127	0.88065	0.84565	0.400896	0.430388	0.380236	0.450479	0.410426	0.351553	0.384498	0.369053	0.285303	0.325728	0.370982	0.303096
L1_-3DPA_3	0.89338	0.943119	1	0.880375	0.949585	0.937814	0.880806	0.845773	0.810673	0.817883	0.878865	0.844912	0.403373	0.429175	0.38203	0.447181	0.410513	0.354443	0.388407	0.374623	0.291054	0.331654	0.368862	0.311192
L2_-3DPA_1	0.915632	0.873346	0.880375	1	0.82742	0.890585	0.843866	0.772292	0.750035	0.866471	0.818985	0.767158	0.383408	0.39762	0.352938	0.390835	0.360418	0.310537	0.317655	0.326576	0.247715	0.306317	0.333026	0.278757
L2_-3DPA_2	0.846068	0.921353	0.949585	0.82742	1	0.909689	0.857653	0.841155	0.813566	0.77366	0.86345	0.853392	0.399186	0.425299	0.375173	0.452558	0.409742	0.351516	0.38917	0.372925	0.289016	0.321919	0.373858	0.301826
L2_-3DPA_3	0.909161	0.916212	0.937814	0.890585	0.909689	1	0.870813	0.845088	0.806181	0.835258	0.87788	0.838099	0.388331	0.412735	0.361418	0.418725	0.386579	0.331116	0.356536	0.347372	0.268238	0.317873	0.344785	0.289545
L1_0DPA_1	0.848196	0.877015	0.880806	0.843866	0.857653	0.870813	1	0.865447	0.849747	0.885796	0.930242	0.895142	0.424053	0.439648	0.34635	0.40755	0.375568	0.321844	0.333845	0.336348	0.277665	0.308252	0.376399	0.272611
L1_0DPA_2	0.802491	0.847446	0.845773	0.772292	0.841155	0.845088	0.865447	1	0.911155	0.802222	0.868379	0.877251	0.401021	0.442989	0.364437	0.447836	0.401576	0.364135	0.372831	0.361266	0.288777	0.321583	0.388828	0.291727
L1_0DPA_3	0.774408	0.815218	0.810673	0.750035	0.813566	0.806181	0.849747	0.911155	1	0.814157	0.855198	0.854775	0.406813	0.451831	0.371	0.450175	0.403096	0.377256	0.366329	0.359194	0.294515	0.32288	0.373265	0.296723
L2_0DPA_1	0.855766	0.806127	0.817883	0.866471	0.77366	0.835258	0.885796	0.802222	0.814157	1	0.863518	0.822268	0.394974	0.404749	0.343199	0.378407	0.354166	0.306006	0.299302	0.310555	0.2558	0.295778	0.34345	0.269911
L2_0DPA_2	0.826807	0.88065	0.878865	0.818985	0.86345	0.87788	0.930242	0.868379	0.855198	0.863518	1	0.903166	0.431619	0.440933	0.355718	0.418897	0.387766	0.333875	0.350258	0.344682	0.294556	0.322135	0.389511	0.285733
L2_0DPA_3	0.777357	0.84565	0.844912	0.767158	0.853392	0.838099	0.895142	0.877251	0.854775	0.822268	0.903166	1	0.418268	0.435833	0.367042	0.437734	0.402423	0.355661	0.362733	0.356551	0.298128	0.322965	0.385573	0.290719
L1_5DPA_1	0.388028	0.400896	0.403373	0.383408	0.399186	0.388331	0.424053	0.401021	0.406813	0.394974	0.431619	0.418268	1	0.896848	0.691019	0.670005	0.724157	0.648892	0.632745	0.659706	0.906759	0.625665	0.895671	0.662045
L1_5DPA_2	0.409225	0.430388	0.429175	0.39762	0.425299	0.412735	0.439648	0.442989	0.451831	0.404749	0.440933	0.435833	0.896848	1	0.756353	0.752621	0.781612	0.69518	0.694571	0.726681	0.85604	0.694254	0.848237	0.721773
L1_5DPA_3	0.365488	0.380236	0.38203	0.352938	0.375173	0.361418	0.34635	0.364437	0.371	0.343199	0.355718	0.367042	0.691019	0.756353	1	0.879855	0.891656	0.838094	0.84158	0.875641	0.707975	0.837451	0.697374	0.897479
L2_5DPA_1	0.408955	0.450479	0.447181	0.390835	0.452558	0.418725	0.40755	0.447836	0.450175	0.378407	0.418897	0.437734	0.670005	0.752621	0.879855	1	0.888183	0.879914	0.81504	0.829652	0.658915	0.78661	0.686037	0.833831
L2_5DPA_2	0.374013	0.410426	0.410513	0.360418	0.409742	0.386579	0.375568	0.401576	0.403096	0.354166	0.387766	0.402423	0.724157	0.781612	0.891656	0.888183	1	0.894294	0.871906	0.87771	0.685933	0.841509	0.734428	0.893857
L2_5DPA_3	0.324404	0.351553	0.354443	0.310537	0.351516	0.331116	0.321844	0.364135	0.377256	0.306006	0.333875	0.355661	0.648892	0.69518	0.838094	0.879914	0.894294	1	0.828872	0.837015	0.634246	0.826016	0.657603	0.850368
L1_10DPA_1	0.333413	0.384498	0.388407	0.317655	0.38917	0.356536	0.333845	0.372831	0.366329	0.299302	0.350258	0.362733	0.632745	0.694571	0.84158	0.81504	0.871906	0.828872	1	0.948623	0.701237	0.911968	0.769075	0.890572
L1_10DPA_2	0.335933	0.369053	0.374623	0.326576	0.372925	0.347372	0.336348	0.361266	0.359194	0.310555	0.344682	0.356551	0.659706	0.726681	0.875641	0.829652	0.87771	0.837015	0.948623	1	0.72197	0.924429	0.78574	0.920994
L1_10DPA_3	0.25873	0.285303	0.291054	0.247715	0.289016	0.268238	0.277665	0.288777	0.294515	0.2558	0.294556	0.298128	0.906759	0.85604	0.707975	0.658915	0.685933	0.634246	0.701237	0.72197	1	0.679356	0.919644	0.714549
L2_10DPA_1	0.312954	0.325728	0.331654	0.306317	0.321919	0.317873	0.308252	0.321583	0.32288	0.295778	0.322135	0.322965	0.625665	0.694254	0.837451	0.78661	0.841509	0.826016	0.911968	0.924429	0.679356	1	0.746862	0.91867
L2_10DPA_2	0.33547	0.370982	0.368862	0.333026	0.373858	0.344785	0.376399	0.388828	0.373265	0.34345	0.389511	0.385573	0.895671	0.848237	0.697374	0.686037	0.734428	0.657603	0.769075	0.78574	0.919644	0.746862	1	0.738533
L2_10DPA_3	0.28975	0.303096	0.311192	0.278757	0.301826	0.289545	0.272611	0.291727	0.296723	0.269911	0.285733	0.290719	0.662045	0.721773	0.897479	0.833831	0.893857	0.850368	0.890572	0.920994	0.714549	0.91867	0.738533	1
