# Supplementary material for: Co-expression network and comparative transcriptome analysis for fiber initiation and elongation reveal genetic differences in two lines from upland cotton CCRI70 RIL population
Source: PeerJ. 2021 Jul 21;9:e11812. doi: 10.7717/peerj.11812 (PMC8308610; doi:10.7717/peerj.11812)
Supplement: Supplemental Information 4 [file peerj-09-11812-s004.xlsx]

## Sheet: L1 -3DPA vs L2 -3DPA
Table S4-1. The differentially expressed genes (DEGs) of each pair-wise comparison of L1 -3DPA vs L2 -3DPA
geneID	L1_-3DPA FPKM	L2_-3DPA FPKM	log2FC	FDR	up or down_regulated in L2	Arabidopsis ID	ArabDesc
Ghir_A01G001190	2.07749	16.6692	2.96821	0.00033866	up	AT1G78300	general regulatory factor 2
Ghir_A01G003670	0	0	29.2389	6.87774e-35	up
Ghir_A01G005490	0.987009	0.0570337	-3.96581	3.11665e-05	down	AT1G53010	RING/U-box superfamily protein
Ghir_A01G005710	3.18723	0.118842	-4.7368	0.0124747	down	AT1G52920	G protein coupled receptor
Ghir_A01G007420	0	0.111114	6.24351	0.0388241	up	AT5G55180	O-Glycosyl hydrolases family 17 protein
Ghir_A01G011900	4.7695	0.450528	-3.42323	0.0188583	down
Ghir_A01G013640	0.275615	0	-21.414	0.02418	down	AT2G30070	potassium transporter 1
Ghir_A01G020870	5.28501	0.041404	-6.94689	0.00235364	down	AT1G18590	sulfotransferase 17
Ghir_A01G022340	0.0700503	0	-5.96516	0.014378	down	AT5G37070	Protein of unknown function, DUF538
Ghir_A02G000770	5.96148	0.933096	-2.6969	0.000273863	down	AT1G05690	BTB and TAZ domain protein 3
Ghir_A02G000790	0.0543863	1.25006	4.27759	6.35995e-05	up	AT5G67480	BTB and TAZ domain protein 4
Ghir_A02G001450	0.115411	0	-18.68	0.000937356	down	AT3G59470	Far-red impaired responsive (FAR1) family protein
Ghir_A02G004800	3.80381	8.60737	1.15572	0.00338533	up	AT5G18640	alpha/beta-Hydrolases superfamily protein
Ghir_A02G004900	2.53081	0.00864067	-7.88598	0.000867703	down	AT5G07900	Mitochondrial transcription termination factor family protein
Ghir_A02G010520	1.05692	0	-10.9771	0.0100713	down	AT5G41960	unknown protein; FUNCTIONS IN: molecular_function unknown; INVOLVED IN: biological_process unknown; LOCATED IN: chloroplast; EXPRESSED IN: 22 plant structures; EXPRESSED DURING: 13 growth stages; Has 1807 Blast hits to 1807 proteins in 277 species: Archae - 0; Bacteria - 0; Metazoa - 736; Fungi - 347; Plants - 385; Viruses - 0; Other Eukaryotes - 339 (source: NCBI BLink).
Ghir_A02G011320	0.691568	0	-22.2912	0.0148295	down	AT1G63980	D111/G-patch domain-containing protein
Ghir_A02G015600	2.01157	0	-22.8212	0.0103127	down	AT4G17720	RNA-binding (RRM/RBD/RNP motifs) family protein
Ghir_A02G016010	0	2.08583	24.4495	0.00014182	up	AT5G65495	unknown protein; Has 9 Blast hits to 9 proteins in 5 species: Archae - 0; Bacteria - 0; Metazoa - 0; Fungi - 0; Plants - 9; Viruses - 0; Other Eukaryotes - 0 (source: NCBI BLink).
Ghir_A03G004730	0.202443	0	-20.7098	0.0364847	down	AT3G45980	Histone superfamily protein
Ghir_A03G009810	3.17521	0.0409063	-5.94573	0.0192346	down	ATCG00470	ATP synthase epsilon chain
Ghir_A03G012080	0.233496	0	-20.3463	0.00206459	down	AT1G68920	basic helix-loop-helix (bHLH) DNA-binding superfamily protein
Ghir_A03G023850	0.44932	0	-21.6057	0.0220711	down	AT5G58470	TBP-associated factor 15B
Ghir_A04G001190	0	1.29165	26.0253	3.37613e-05	up	AT5G55180	O-Glycosyl hydrolases family 17 protein
Ghir_A04G002570	0	0.642739	27.4098	0.000383269	up	AT5G11340	Acyl-CoA N-acyltransferases (NAT) superfamily protein
Ghir_A04G002990	0.226768	6.53035	4.83918	0.0105583	up	AT1G52980	GTP-binding family protein
Ghir_A04G006070	1.66771	0	-22.0567	2.60273e-07	down	AT2G42040	CONTAINS InterPro DOMAIN/s: WRC (InterPro:IPR014977); Has 219 Blast hits to 219 proteins in 19 species: Archae - 0; Bacteria - 0; Metazoa - 3; Fungi - 0; Plants - 215; Viruses - 0; Other Eukaryotes - 1 (source: NCBI BLink).
Ghir_A04G008080	0.0471063	0.687403	3.81048	0.0202372	up	AT3G09830	Protein kinase superfamily protein
Ghir_A04G012650	0.181979	1.46436	2.97177	9.04198e-06	up	AT5G64430	Octicosapeptide/Phox/Bem1p family protein
Ghir_A04G013480	0.208642	0	-20.4333	1.10589e-12	down	AT4G39050	Kinesin motor family protein
Ghir_A04G015870	0.372371	6.62018	4.13646	9.99165e-07	up	AT1G69420	DHHC-type zinc finger family protein
Ghir_A05G002420	0.503883	4.2619	3.06829	0.00132884	up	AT4G13250	NAD(P)-binding Rossmann-fold superfamily protein
Ghir_A05G006080	1.81065	7.91702	2.10404	4.168e-09	up	AT2G24270	aldehyde dehydrogenase 11A3
Ghir_A05G006750	1.5067	10.2848	2.74884	0.0220707	up	AT2G24490	replicon protein A2
Ghir_A05G010130	0.005071	46.6341	12.954	0.00902651	up	AT5G59970	Histone superfamily protein
Ghir_A05G010990	0.017208	0.446313	4.60186	0.0301888	up	AT2G30020	Protein phosphatase 2C family protein
Ghir_A05G013150	0.168508	0	-20.0724	0.0377284	down	AT1G79990	structural molecules
Ghir_A05G013300	3.7668	7.82746	1.02551	0.0100713	up	AT3G16110	PDI-like 1-6
Ghir_A05G013350	5.21299	0.297908	-4.1095	0.0296378	down	AT1G79850	ribosomal protein S17
Ghir_A05G013650	0.0601743	0	-18.3828	0.0018846	down	AT3G16490	IQ-domain 26
Ghir_A05G015940	0.003264	0	-13.5701	5.37974e-05	down	AT2G38300	myb-like HTH transcriptional regulator family protein
Ghir_A05G019840	0.28498	0	-21.5144	0.0229098	down	AT1G75170	Sec14p-like phosphatidylinositol transfer family protein
Ghir_A05G023000	0.174518	0.004641	-4.88626	0.000398316	down	AT1G22360	UDP-glucosyl transferase 85A2
Ghir_A05G025490	0.0119767	0.111064	3.0578	0.029629	up	AT1G71880	sucrose-proton symporter 1
Ghir_A05G027360	0	0	29.9999	6.8944e-13	up	AT4G08180	OSBP(oxysterol binding protein)-related protein 1C
Ghir_A05G033850	38.7612	11.8513	-1.73744	0.00563093	down	AT2G01140	Aldolase superfamily protein
Ghir_A05G036950	0	0.18667	27.7714	0.000288912	up	AT5G14500	aldose 1-epimerase family protein
Ghir_A05G041150	0	0	18.8357	0.0159676	up	AT5G09860	nuclear matrix protein-related
Ghir_A05G042450	0.080147	0	-17.79	0.043088	down	AT5G04250	Cysteine proteinases superfamily protein
Ghir_A05G043220	0.871178	32.4143	5.20198	0.0463879	up	AT1G20330	sterol methyltransferase 2
Ghir_A06G005280	0.142684	1.37543	3.25638	0.0229098	up	AT5G25270	Ubiquitin-like superfamily protein
Ghir_A06G006980	0.00078	0.272655	7.78709	0.00738704	up	AT2G19950	golgin candidate 1
Ghir_A06G017200	0.189569	0	-7.18953	0.00426827	down	AT5G05360	unknown protein; INVOLVED IN: biological_process unknown; LOCATED IN: chloroplast; BEST Arabidopsis thaliana protein match is: unknown protein (TAIR:AT2G38450.1); Has 84 Blast hits to 84 proteins in 24 species: Archae - 0; Bacteria - 8; Metazoa - 0; Fungi - 0; Plants - 73; Viruses - 0; Other Eukaryotes - 3 (source: NCBI BLink).
Ghir_A06G018080	0	0	24.293	2.04517e-16	up	AT2G39420	alpha/beta-Hydrolases superfamily protein
Ghir_A06G019220	0	0.493877	24.3346	2.71767e-07	up	AT5G57655	xylose isomerase family protein
Ghir_A06G019580	0.0662117	0	-18.5448	0.0227785	down	AT1G30620	NAD(P)-binding Rossmann-fold superfamily protein
Ghir_A06G019880	6.5143	1.72238	-1.93752	0.0148295	down	AT1G61000	FUNCTIONS IN: molecular_function unknown; INVOLVED IN: mitosis; LOCATED IN: plasma membrane; EXPRESSED IN: cultured cell; CONTAINS InterPro DOMAIN/s: Kinetochore protein Nuf2 (InterPro:IPR005549); Has 50972 Blast hits to 29793 proteins in 2070 species: Archae - 902; Bacteria - 7404; Metazoa - 23628; Fungi - 4156; Plants - 2312; Viruses - 158; Other Eukaryotes - 12412 (source: NCBI BLink).
Ghir_A07G005350	0.00903033	0	-14.902	0.0383883	down	AT5G50915	basic helix-loop-helix (bHLH) DNA-binding superfamily protein
Ghir_A07G012350	2.45796	0	-24.0853	0.00463652	down	AT3G07630	arogenate dehydratase 2
Ghir_A07G015140	0.14234	0	-19.3714	0.00108775	down	AT4G00660	RNAhelicase-like 8
Ghir_A07G016590	0.002672	0.232527	6.13968	0.0415485	up	AT3G24715	Protein kinase superfamily protein with octicosapeptide/Phox/Bem1p domain
Ghir_A07G021430	0.09945	0	-6.5446	0.0391992	down	AT3G25160	ER lumen protein retaining receptor family protein
Ghir_A08G000380	74.0614	0.0353527	-10.6598	3.32956e-05	down	AT5G02560	histone H2A 12
Ghir_A08G000390	120.9	0.218462	-9.07371	0.000101185	down	AT5G02560	histone H2A 12
Ghir_A08G000790	0	2.27851	26.4599	0.000842368	up	AT5G22780	Adaptor protein complex AP-2, alpha subunit
Ghir_A08G002310	0.105728	2.85843	4.70979	0.00020402	up	AT2G19170	subtilisin-like serine protease 3
Ghir_A08G003990	0.346758	0	-20.5947	0.00902651	down	AT3G02470	S-adenosylmethionine decarboxylase
Ghir_A08G005980	0.274915	0	-21.1004	0.029629	down	AT3G53170	Tetratricopeptide repeat (TPR)-like superfamily protein
Ghir_A08G008130	0.445775	7.55732	4.07275	0.0287242	up	AT3G62830	NAD(P)-binding Rossmann-fold superfamily protein
Ghir_A08G011570	0	0.0866147	22.4581	1.75726e-08	up	AT1G32920	unknown protein; FUNCTIONS IN: molecular_function unknown; INVOLVED IN: response to wounding; LOCATED IN: endomembrane system; EXPRESSED IN: 23 plant structures; EXPRESSED DURING: 13 growth stages; BEST Arabidopsis thaliana protein match is: unknown protein (TAIR:AT1G32928.1); Has 42 Blast hits to 42 proteins in 8 species: Archae - 0; Bacteria - 0; Metazoa - 0; Fungi - 0; Plants - 42; Viruses - 0…
Ghir_A08G013370	4.74885	0.0547897	-6.42224	0.00667454	down	AT3G61710	AUTOPHAGY 6
Ghir_A08G015920	5.25958	0	-24.8692	0.00277665	down	AT4G19110	Protein kinase superfamily protein
Ghir_A08G016610	0.249673	0	-21.5049	0.0229244	down	AT1G32560	Late embryogenesis abundant protein, group 1 protein
Ghir_A08G016640	0.0568403	0	-17.8557	0.00571423	down	AT4G17970	aluminum-activated, malate transporter 12
Ghir_A08G021600	0.162749	31.4856	7.53675	9.71154e-07	up	AT1G56300	Chaperone DnaJ-domain superfamily protein
Ghir_A08G022860	0.173023	0	-20.0712	0.0383128	down	AT5G17840	DnaJ/Hsp40 cysteine-rich domain superfamily protein
Ghir_A08G023840	0.062002	0	-19.2006	0.00561637	down	AT3G24080	KRR1 family protein
Ghir_A09G000650	1.11237	6.21615	2.47788	0.029629	up	AT5G13340	unknown protein; FUNCTIONS IN: molecular_function unknown; INVOLVED IN: biological_process unknown; LOCATED IN: chloroplast; BEST Arabidopsis thaliana protein match is: unknown protein (TAIR:AT1G10890.1); Has 1807 Blast hits to 1807 proteins in 277 species: Archae - 0; Bacteria - 0; Metazoa - 736; Fungi - 347; Plants - 385; Viruses - 0; Other Eukaryotes - 339 (source: NCBI BLink).
Ghir_A09G001400	0.0109353	0.479515	5.3605	0.00563093	up	AT5G15270	RNA-binding KH domain-containing protein
Ghir_A09G001930	0.116633	0	-20.0775	1.41142e-05	down	AT4G08850	Leucine-rich repeat receptor-like protein kinase family protein
Ghir_A09G002490	0.192479	0	-7.81053	0.0415485	down	AT3G28480	Oxoglutarate/iron-dependent oxygenase
Ghir_A09G004370	0	1.08971	28.4635	0.000169548	up	AT3G49000	RNA polymerase III subunit RPC82 family protein
Ghir_A09G013820	0	1.11698	23.4953	0.0019221	up	AT1G57860	Translation protein SH3-like family protein
Ghir_A10G001300	2.39919	0	-24.0544	0.00472159	down	AT1G11480	eukaryotic translation initiation factor-related
Ghir_A10G003760	16.2039	0	-24.2482	0.00306301	down	AT2G34480	Ribosomal protein L18ae/LX family protein
Ghir_A10G005540	9.39668	0.0114127	-9.54045	0.0149366	down	AT1G72970	Glucose-methanol-choline (GMC) oxidoreductase family protein
Ghir_A10G005600	0	0	25.2755	1.56196e-14	up	AT3G13790	Glycosyl hydrolases family 32 protein
Ghir_A10G006440	0.199505	0	-21.6025	0.0220711	down	AT3G16260	tRNAse Z4
Ghir_A10G009750	0.368747	0	-20.9863	8.8046e-09	down	AT5G66030	Golgi-localized GRIP domain-containing protein
Ghir_A10G010290	0.000818667	0.268056	8.30268	0.001336	up	AT2G28290	P-loop containing nucleoside triphosphate hydrolases superfamily protein
Ghir_A10G010460	0	0.0347703	5.99016	0.000579952	up	AT5G18840	Major facilitator superfamily protein
Ghir_A10G010640	3.69507	0.77332	-2.27362	0.000120518	down	AT3G23920	beta-amylase 1
Ghir_A10G013940	0	0	15.8364	0.0240883	up	AT3G59420	crinkly4
Ghir_A10G016830	0.614225	8.49119	3.78906	0.00985211	up
Ghir_A10G018300	0.659893	0	-20.7176	0.0364477	down	AT3G10915	Reticulon family protein
Ghir_A10G021050	0.378504	0	-21.0658	2.17065e-05	down	AT2G39220	PATATIN-like protein 6
Ghir_A11G003950	8.02089	0.0368437	-7.69845	1.75149e-07	down	AT5G15740	O-fucosyltransferase family protein
Ghir_A11G004820	0.057345	3.56539	5.89918	0.00948429	up	AT2G17790	VPS35 homolog A
Ghir_A11G011050	0	0.130422	24.1699	0.00437335	up	AT3G49530	NAC domain containing protein 62
Ghir_A11G011170	0.077836	3.72269	5.55734	0.029629	up	AT2G47070	squamosa promoter binding protein-like 1
Ghir_A11G012880	0.145734	5.04275	5.07786	3.17456e-07	up	AT2G48110	reduced epidermal fluorescence 4
Ghir_A11G014210	0.155281	0.934597	2.55774	0.0333953	up	AT1G04090	Plant protein of unknown function (DUF946)
Ghir_A11G025850	0.0420647	0	-5.29926	0.0368263	down
Ghir_A11G031900	0.146464	0	-20.6007	0.012372	down	AT2G44260	Plant protein of unknown function (DUF946)
Ghir_A12G000800	0.237751	0	-20.5277	0.0148678	down	AT2G47940	DEGP protease 2
Ghir_A12G001080	0.203473	0.00340467	-5.22081	0.0383883	down	AT2G47760	asparagine-linked glycosylation 3
Ghir_A12G005070	2.88319	0	-22.2384	8.64002e-16	down
Ghir_A12G008500	0.0965997	0	-6.6178	0.0452459	down	AT5G13870	xyloglucan endotransglucosylase/hydrolase 5
Ghir_A12G009990	0.016254	4.24228	7.96518	8.43111e-08	up	AT4G39690	FUNCTIONS IN: molecular_function unknown; INVOLVED IN: biological_process unknown; LOCATED IN: mitochondrion; EXPRESSED IN: 26 plant structures; EXPRESSED DURING: 14 growth stages; CONTAINS InterPro DOMAIN/s: Mitochondrial inner membrane protein Mitofilin (InterPro:IPR019133); Has 30201 Blast hits to 17322 proteins in 780 species: Archae - 12; Bacteria - 1396; Metazoa - 17338; Fungi - 3422; Plant…
Ghir_A12G012020	1.13455	0	-23.9158	0.00517786	down	AT3G61690	nucleotidyltransferases
Ghir_A12G016500	6.12441	0.340012	-4.18081	7.25271e-09	down	AT1G25220	anthranilate synthase beta subunit 1
Ghir_A12G019220	0	2.10461	27.9554	0.000251095	up	AT5G07920	diacylglycerol kinase1
Ghir_A12G020070	0	0.110729	23.909	0.00378596	up	AT5G50390	Pentatricopeptide repeat (PPR-like) superfamily protein
Ghir_A12G022270	0	0	16.5782	0.00561637	up	AT5G46580	pentatricopeptide (PPR) repeat-containing protein
Ghir_A12G022300	0	0.189476	8.11621	0.006631	up	AT2G01050	zinc ion binding;nucleic acid binding
Ghir_A12G024510	0.0213353	1.46391	6.03591	0.0060531	up	AT4G11280	1-aminocyclopropane-1-carboxylic acid (acc) synthase 6
Ghir_A12G026210	0.902005	0	-21.5256	0.0229098	down	AT5G24310	ABL interactor-like protein 3
Ghir_A12G026280	0.295502	0	-22.5227	0.0127194	down	AT4G00990	Transcription factor jumonji (jmjC) domain-containing protein
Ghir_A13G000050	0.000246667	0.35706	7.85999	0.00206841	up
Ghir_A13G006870	12.9589	2.73438	-2.26726	7.64693e-05	down	AT4G33510	3-deoxy-d-arabino-heptulosonate 7-phosphate synthase
Ghir_A13G007580	0.67603	7.80939	3.53044	0.0157141	up	AT1G26800	RING/U-box superfamily protein
Ghir_A13G014590	0	0.395459	9.91327	0.0148678	up	AT4G26340	F-box/RNI-like/FBD-like domains-containing protein
Ghir_A13G014980	0	3.33014	26.7043	0.000682409	up	AT1G11360	Adenine nucleotide alpha hydrolases-like superfamily protein
Ghir_A13G015240	0.00183	0	-13.5303	0.00571423	down	AT1G53040	Protein of unknown function (DUF616)
Ghir_A13G023550	0	0.147308	24.1564	2.56312e-07	up	AT3G44460	Basic-leucine zipper (bZIP) transcription factor family protein
Ghir_D01G008330	0.00469833	0.972577	7.3395	0.00340048	up	AT3G13110	serine acetyltransferase 2;2
Ghir_D01G010220	0	0.898752	26.7061	0.000682409	up	AT1G76270	O-fucosyltransferase family protein
Ghir_D01G014480	0	0.111304	27.4849	0.000361231	up	AT4G15090	FRS (FAR1 Related Sequences) transcription factor family
Ghir_D01G018800	0	0	17.1717	1.42162e-06	up	AT1G50110	D-aminoacid aminotransferase-like PLP-dependent enzymes superfamily protein
Ghir_D01G020150	0	0.000477	16.4201	8.79794e-05	up	AT5G04140	glutamate synthase 1
Ghir_D01G022180	1.12068	0	-23.7887	0.00561637	down	AT2G36960	TSL-kinase interacting protein 1
Ghir_D01G022900	50.4686	0.368168	-7.10784	0.00315041	down	AT5G59970	Histone superfamily protein
Ghir_D01G023960	8.42401	27.9296	1.71273	7.64693e-05	up	AT5G01650	Tautomerase/MIF superfamily protein
Ghir_D02G000910	0	0.272135	8.75958	0.0229098	up	AT3G59770	sacI homology domain-containing protein / WW domain-containing protein
Ghir_D02G008400	0.003209	0.520638	7.20075	3.06262e-06	up	AT1G22060	LOCATED IN: vacuole; EXPRESSED IN: 23 plant structures; EXPRESSED DURING: 13 growth stages; BEST Arabidopsis thaliana protein match is: FBD, F-box and Leucine Rich Repeat domains containing protein (TAIR:AT1G22000.1); Has 84739 Blast hits to 38714 proteins in 2257 species: Archae - 1436; Bacteria - 11314; Metazoa - 40747; Fungi - 7706; Plants - 4675; Viruses - 308; Other Eukaryotes - 18553 (sourc…
Ghir_D02G017400	0	0.230604	25.0881	5.59253e-10	up	AT1G70060	SIN3-like 4
Ghir_D02G021060	0.367338	0	-20.978	0.0312284	down	AT2G04305	Magnesium transporter CorA-like family protein
Ghir_D02G021970	0	0.0131973	19.1004	1.17192e-06	up	AT3G19320	Leucine-rich repeat (LRR) family protein
Ghir_D02G022010	0.0706793	8.29454	6.83734	0.0333953	up	AT1G49760	poly(A) binding protein 8
Ghir_D03G004060	0	0.499507	10.5166	0.000150093	up	AT5G65300	unknown protein; Has 30201 Blast hits to 17322 proteins in 780 species: Archae - 12; Bacteria - 1396; Metazoa - 17338; Fungi - 3422; Plants - 5037; Viruses - 0; Other Eukaryotes - 2996 (source: NCBI BLink).
Ghir_D03G007800	4.28623	18.6829	2.09185	0.0436329	up	AT3G10300	Calcium-binding EF-hand family protein
Ghir_D03G009260	0	0	14.8226	0.0388241	up	AT3G61920	unknown protein; FUNCTIONS IN: molecular_function unknown; INVOLVED IN: N-terminal protein myristoylation; LOCATED IN: cellular_component unknown; EXPRESSED IN: shoot, hypocotyl, root, egg cell; BEST Arabidopsis thaliana protein match is: unknown protein (TAIR:AT1G64700.1); Has 77 Blast hits to 77 proteins in 8 species: Archae - 0; Bacteria - 0; Metazoa - 0; Fungi - 0; Plants - 77; Viruses - 0; O…
Ghir_D04G004070	0.00335433	0.372213	6.69346	3.92582e-05	up	AT3G58790	galacturonosyltransferase 15
Ghir_D04G004090	0	0.13597	23.2816	0.00773902	up	AT3G42170	BED zinc finger ;hAT family dimerisation domain
Ghir_D04G012830	0.0729827	0.65398	3.11725	1.08372e-06	up	AT5G02580	Plant protein 1589 of unknown function
Ghir_D04G018550	0	0.020784	6.05493	0.0484019	up	AT1G09970	Leucine-rich receptor-like protein kinase family protein
Ghir_D04G018670	1.31663	0	-22.1303	0.0160844	down	AT2G14530	TRICHOME BIREFRINGENCE-LIKE 13
Ghir_D05G001550	0.20605	3.2805	3.96375	0.0185645	up	AT5G20350	Ankyrin repeat family protein with DHHC zinc finger domain
Ghir_D05G003770	0.0174767	2.40378	6.91269	0.0416956	up
Ghir_D05G004500	0.00135	0	-13.0684	0.000144164	down	AT2G46210	Fatty acid/sphingolipid desaturase
Ghir_D05G010460	0.104426	0	-21.7856	0.0200404	down	AT1G08060	ATP-dependent helicase family protein
Ghir_D05G011910	0.00109267	0.501179	8.40832	0.0214231	up	AT1G76690	12-oxophytodienoate reductase 2
Ghir_D05G016790	0	2.02312	25.4247	7.74885e-07	up	AT4G21580	oxidoreductase, zinc-binding dehydrogenase family protein
Ghir_D05G019870	0	0.121189	8.14074	0.00985211	up
Ghir_D05G020220	0	0.214623	22.4214	0.0137224	up	AT2G26490	Transducin/WD40 repeat-like superfamily protein
Ghir_D05G022830	0.0397723	0.777782	4.22105	0.00018484	up	AT1G78280	transferases, transferring glycosyl groups
Ghir_D05G026090	1.86009	0.023222	-6.28583	0.0417797	down	AT1G75660	5'-3' exoribonuclease 3
Ghir_D05G028060	5.64643	0.0238473	-7.84436	6.62913e-05	down	AT1G71980	Protease-associated (PA) RING/U-box zinc finger family protein
Ghir_D05G034630	0	0.00115433	16.5706	0.00406206	up	AT1G53440	Leucine-rich repeat transmembrane protein kinase
Ghir_D06G000130	0.167121	2.00926	3.5236	0.000319793	up	AT1G75780	tubulin beta-1 chain
Ghir_D06G001570	0.015117	0	-16.1016	1.27387e-06	down	AT4G33330	plant glycogenin-like starch initiation protein 3
Ghir_D06G001600	0	0	17.5237	7.1203e-05	up	AT5G42890	sterol carrier protein 2
Ghir_D06G004030	0.571281	0.00303067	-7.3944	0.0415485	down	AT4G08690	Sec14p-like phosphatidylinositol transfer family protein
Ghir_D06G010950	0.636231	3.75782	2.54885	0.00788584	up	AT4G32160	Phox (PX) domain-containing protein
Ghir_D06G015130	2.29693	0.013993	-7.11239	0.0220707	down	AT5G45700	Haloacid dehalogenase-like hydrolase (HAD) superfamily protein
Ghir_D06G019080	0.677136	0	-22.0578	2.56312e-07	down	AT2G35800	mitochondrial substrate carrier family protein
Ghir_D06G020250	0	0.00846767	18.358	3.67382e-11	up	AT2G02990	ribonuclease 1
Ghir_D06G020920	0.0122597	0	-16.1616	0.000176599	down	AT1G78955	camelliol C synthase 1
Ghir_D06G021830	0.298147	2.55321	3.08806	0.00528858	up	AT5G48930	hydroxycinnamoyl-CoA shikimate/quinate hydroxycinnamoyl transferase
Ghir_D06G023650	0	0.0306223	5.55102	0.0184098	up	AT5G14980	alpha/beta-Hydrolases superfamily protein
Ghir_D07G000330	0.119423	0	-16.6794	3.11665e-05	down
Ghir_D07G003290	0.0839087	2.45534	4.8375	0.00206841	up	AT4G32330	TPX2 (targeting protein for Xklp2) protein family
Ghir_D07G010360	14.9059	1.06178	-3.83794	0.0406212	down	AT5G59730	exocyst subunit exo70 family protein H7
Ghir_D07G014900	0.618053	0	-19.5344	6.91595e-05	down	AT5G63630	P-loop containing nucleoside triphosphate hydrolases superfamily protein
Ghir_D07G021920	6.17834	0	-26.0262	0.00116692	down	AT2G20190	CLIP-associated protein
Ghir_D08G002730	0	13.0227	28.9651	3.52892e-06	up	AT1G51060	histone H2A 10
Ghir_D08G007950	0	0.394679	22.7681	4.91929e-07	up	AT2G43350	glutathione peroxidase 3
Ghir_D08G009210	0	0	15.0766	0.00651431	up	AT5G57510	unknown protein; Has 27 Blast hits to 27 proteins in 9 species: Archae - 0; Bacteria - 0; Metazoa - 0; Fungi - 0; Plants - 27; Viruses - 0; Other Eukaryotes - 0 (source: NCBI BLink).
Ghir_D08G014350	0	0.0643657	21.9455	0.0184098	up	AT2G46240	BCL-2-associated athanogene 6
Ghir_D08G014790	2.38093	9.13488	1.91863	4.99362e-05	up	AT1G01730	unknown protein; FUNCTIONS IN: molecular_function unknown; INVOLVED IN: biological_process unknown; LOCATED IN: chloroplast; EXPRESSED IN: 23 plant structures; EXPRESSED DURING: 13 growth stages; Has 42 Blast hits to 42 proteins in 17 species: Archae - 0; Bacteria - 2; Metazoa - 5; Fungi - 1; Plants - 34; Viruses - 0; Other Eukaryotes - 0 (source: NCBI BLink).
Ghir_D08G018270	0.01084	1.30989	6.5781	0.00887869	up	AT4G17510	ubiquitin C-terminal hydrolase 3
Ghir_D08G021420	19.1305	0	-27.545	0.000343434	down	AT5G21105	Plant L-ascorbate oxidase
Ghir_D09G006930	2.12499	0.165836	-3.68485	0.00182836	down	AT4G24220	NAD(P)-binding Rossmann-fold superfamily protein
Ghir_D09G007220	0.093599	2.6286	4.77075	0.0190441	up	AT3G17430	Nucleotide-sugar transporter family protein
Ghir_D09G009510	0.893215	0	-21.0545	3.49445e-13	down	AT3G11170	fatty acid desaturase 7
Ghir_D09G009730	0.002993	0	-14.0366	1.79523e-05	down	AT2G38540	lipid transfer protein 1
Ghir_D09G011070	1.17983	4.54123	1.90963	0.0447962	up	AT2G26980	CBL-interacting protein kinase 3
Ghir_D09G012170	3.93989	0	-24.5046	0.00345006	down	AT3G56720	unknown protein; FUNCTIONS IN: molecular_function unknown; INVOLVED IN: biological_process unknown; LOCATED IN: cellular_component unknown; EXPRESSED IN: 24 plant structures; EXPRESSED DURING: 15 growth stages.
Ghir_D09G012900	1.28635	0.242237	-2.41912	0.00402662	down	AT3G57790	Pectin lyase-like superfamily protein
Ghir_D09G013860	0.380152	0.0798017	-2.24473	0.00116692	down	AT3G11660	NDR1/HIN1-like 1
Ghir_D09G015490	0.11183	0.0303473	-1.88671	0.0146945	down	AT2G37090	Nucleotide-diphospho-sugar transferases superfamily protein
Ghir_D09G016670	0	1.19937	23.704	1.59018e-07	up	AT3G54140	peptide transporter 1
Ghir_D09G019640	0.678809	0	-20.9074	2.11857e-08	down	AT4G23010	UDP-galactose transporter 2
Ghir_D09G019750	0.024375	3.57132	7.14271	7.09864e-05	up	AT4G12040	A20/AN1-like zinc finger family protein
Ghir_D09G021980	0	2.12777	11.8377	0.00709815	up	AT2G38580	Mitochondrial ATP synthase D chain-related protein
Ghir_D09G022290	0	1.27284	26.2398	0.000995091	up	AT4G14880	O-acetylserine (thiol) lyase (OAS-TL) isoform A1
Ghir_D09G024910	3.51941	24.0817	2.77091	0.0294982	up	AT1G13950	eukaryotic elongation factor 5A-1
Ghir_D09G025430	0	0.337172	23.5156	2.51478e-06	up	AT5G61910	DCD (Development and Cell Death) domain protein
Ghir_D10G000250	0.914619	0	-22.2667	0.0148678	down	AT1G50430	Ergosterol biosynthesis ERG4/ERG24 family
Ghir_D10G003430	18.265	0.107232	-7.3976	3.04384e-09	down	AT2G34040	Apoptosis inhibitory protein 5 (API5)
Ghir_D10G004980	0.839683	0	-23.9155	0.00517786	down	AT2G34630	geranyl diphosphate synthase 1
Ghir_D10G006560	5.18872	0.767596	-2.75853	0.0347787	down	AT1G55160	unknown protein; FUNCTIONS IN: molecular_function unknown; INVOLVED IN: biological_process unknown; LOCATED IN: mitochondrion, plastid; EXPRESSED IN: 22 plant structures; EXPRESSED DURING: 13 growth stages; BEST Arabidopsis thaliana protein match is: unknown protein (TAIR:AT2G19530.1); Has 30201 Blast hits to 17322 proteins in 780 species: Archae - 12; Bacteria - 1396; Metazoa - 17338; Fungi - 34…
Ghir_D10G008560	0	0.0778747	20.8037	2.58607e-09	up	AT5G14030	translocon-associated protein beta (TRAPB) family protein
Ghir_D10G015060	0.163788	0	-18.7876	8.51194e-06	down	AT4G13620	Integrase-type DNA-binding superfamily protein
Ghir_D10G017810	0.0647913	1.84506	4.78472	0.00233556	up	AT5G18660	NAD(P)-binding Rossmann-fold superfamily protein
Ghir_D10G018100	0.441374	0	-20.9315	0.0320366	down	AT5G48970	Mitochondrial substrate carrier family protein
Ghir_D10G027700	2.19013	0	-23.3504	0.00738704	down	AT3G48050	BAH domain ;TFIIS helical bundle-like domain
Ghir_D11G000090	0	0.0447943	24.6877	0.0031283	up
Ghir_D11G003910	1.45438	0	-23.0165	0.000219429	down	AT5G08130	basic helix-loop-helix (bHLH) DNA-binding superfamily protein
Ghir_D11G004160	0.131433	0	-5.66585	0.030165	down	AT3G27030	unknown protein; FUNCTIONS IN: molecular_function unknown; INVOLVED IN: biological_process unknown; LOCATED IN: endomembrane system; CONTAINS InterPro DOMAIN/s: Protein of unknown function DUF3339 (InterPro:IPR021775); BEST Arabidopsis thaliana protein match is: Protein of unknown function (DUF 3339) (TAIR:AT5G40970.1); Has 538 Blast hits to 271 proteins in 16 species: Archae - 0; Bacteria - 0; M…
Ghir_D11G005770	10.1198	4.81542	-1.08732	1.1764e-05	down	AT5G10290	leucine-rich repeat transmembrane protein kinase family protein
Ghir_D11G006910	4.09938	0.118494	-5.07373	0.00240339	down	ATCG01310	ribosomal protein L2
Ghir_D11G007360	1.80815	0	-23.9864	0.00495672	down	AT5G40270	HD domain-containing metal-dependent phosphohydrolase family protein
Ghir_D11G009060	0	0.193665	7.28046	0.0440603	up	AT1G43730	RNA-directed DNA polymerase (reverse transcriptase)-related family protein
Ghir_D11G010250	12.1431	0	-27.1049	0.00049375	down	AT4G01070	UDP-Glycosyltransferase superfamily protein
Ghir_D11G010740	0	0.43509	26.6235	3.67283e-13	up	AT4G00830	RNA-binding (RRM/RBD/RNP motifs) family protein
Ghir_D11G013080	0	0.239227	24.781	2.80336e-14	up	AT4G02780	Terpenoid cyclases/Protein prenyltransferases superfamily protein
Ghir_D11G017940	0.0710887	0	-17.5101	2.22782e-05	down	AT5G37310	Endomembrane protein 70 protein family
Ghir_D11G034060	0.00577867	0.294851	5.68319	0.0192346	up	AT3G50170	Plant protein of unknown function (DUF247)
Ghir_D11G035390	9.39439	0.00814967	-9.86704	0.000287588	down
Ghir_D11G035810	0.011193	1.57916	7.00625	0.00171447	up	AT5G03470	Protein phosphatase 2A regulatory B subunit family protein
Ghir_D12G001450	0.129091	0	-20.3366	0.0441139	down	AT1G22040	Galactose oxidase/kelch repeat superfamily protein
Ghir_D12G005120	2.15313	0.004625	-8.37426	1.18579e-05	down	AT1G30825	Arp2/3 complex, 34 kD subunit p34-Arc
Ghir_D12G010290	0.0266727	0	-17.4526	0.00571423	down	AT5G21080	Uncharacterized protein
Ghir_D12G014130	0.0589013	0	-16.2691	0.000125497	down	AT1G02816	Protein of unknown function, DUF538
Ghir_D12G014790	0	0.613037	24.7965	0.00291988	up	AT1G07400	HSP20-like chaperones superfamily protein
Ghir_D12G015630	1.01051	0	-22.9323	0.00973976	down	AT1G25370	Protein of unknown function (DUF1639)
Ghir_D12G015680	0.092981	7.87182	6.37621	0.00248437	up	AT1G70330	equilibrative nucleotide transporter 1
Ghir_D12G018820	0	0.116435	8.14036	0.0404528	up	AT1G69850	nitrate transporter 1:2
Ghir_D12G018830	0	0.05074	20.5246	0.00319661	up	AT3G01280	voltage dependent anion channel 1
Ghir_D12G019420	0	0	12.2548	0.00278608	up	AT5G07910	Leucine-rich repeat (LRR) family protein
Ghir_D12G023250	5.32446	1.61118	-1.74966	0.0333953	down	AT4G16510	YbaK/aminoacyl-tRNA synthetase-associated domain
Ghir_D12G024400	0.009276	0.364437	4.98287	0.00307289	up	AT3G29360	UDP-glucose 6-dehydrogenase family protein
Ghir_D12G025120	0	1.08149	10.1456	0.0272153	up	AT5G24310	ABL interactor-like protein 3
Ghir_D12G029360	0.243216	0	-21.4646	0.0235129	down	AT5G51050	Mitochondrial substrate carrier family protein
Ghir_D13G000950	0	0.0966977	7.90927	0.000593709	up	AT4G32300	S-domain-2 5
Ghir_D13G005610	0.166689	0	-18.6472	3.04384e-09	down	AT5G64130	cAMP-regulated phosphoprotein 19-related protein
Ghir_D13G007310	0.261631	0	-19.5871	0.00352808	down	AT1G25520	Uncharacterized protein family (UPF0016)
Ghir_D13G009470	0.39028	0.00652067	-5.75756	0.0317963	down	AT1G26190	Phosphoribulokinase / Uridine kinase family
Ghir_D13G009510	0	0.0357483	20.8481	1.42162e-06	up	AT2G43290	Calcium-binding EF-hand family protein
Ghir_D13G013030	1.03848	0	-22.5159	3.32956e-05	down	AT3G57560	N-acetyl-l-glutamate kinase
Ghir_D13G015780	0	0.743002	28.2988	0.000190678	up	AT3G52880	monodehydroascorbate reductase 1
Ghir_D13G016920	0.318419	0	-21.1819	0.0282951	down	AT5G56270	WRKY DNA-binding protein 2
Ghir_D13G019200	0	0.461211	25.9661	1.20059e-19	up	AT5G27490	Integral membrane Yip1 family protein
Ghir_D13G022290	0	0.84497	24.8582	2.8848e-20	up	AT5G34850	purple acid phosphatase 26
Ghir_D13G023550	0	0	17.6914	0.0220711	up	AT3G08500	myb domain protein 83
Ghir_D13G024250	12.1802	3.45231	-1.845	0.0202317	down	AT2G27510	ferredoxin 3
Ghir_D13G025530	0.014359	1.24838	6.24177	0.0262235	up	AT2G30140	UDP-Glycosyltransferase superfamily protein
Ghir_D13G025660	2.0473	8.54202	2.02585	0.0348241	up	AT2G01070	Lung seven transmembrane receptor family protein
Ghir_Scaffold843G000020	0.240565	0	-6.95904	0.029629	down	AT1G16870	mitochondrial 28S ribosomal protein S29-related

## Sheet: L1 0DPA vs L2 0DPA
Table S4-2. The differentially expressed genes (DEGs) of each pair-wise comparison of L1 0DPA vs L2 0DPA
geneID	L1_0DPA FPKM	L2_0DPA FPKM	log2FC	FDR	up or down_regulated in L2	Arabidopsis ID	ArabDesc
Ghir_A01G001190	1.54462	22.2941	3.80284	1.47586e-07	up	AT1G78300	general regulatory factor 2
Ghir_A01G003790	0	0.37666	7.50627	0.000231769	up
Ghir_A01G003990	0.564597	0	-26.1512	0.000673618	down	AT4G27190	NB-ARC domain-containing disease resistance protein
Ghir_A01G005490	0.601108	0.070133	-3.01749	0.00340377	down	AT1G53010	RING/U-box superfamily protein
Ghir_A01G006790	0	0.437513	24.0585	2.46498e-13	up	AT4G23160	cysteine-rich RLK (RECEPTOR-like protein kinase) 8
Ghir_A01G010060	0.002245	1.44647	8.22206	0.0166935	up	AT1G30845	unknown protein; Has 120 Blast hits to 120 proteins in 67 species: Archae - 0; Bacteria - 0; Metazoa - 35; Fungi - 37; Plants - 23; Viruses - 0; Other Eukaryotes - 25 (source: NCBI BLink).
Ghir_A01G013750	0.334565	1.98849	2.53846	0.000692841	up	AT1G75010	GTP binding
Ghir_A01G014190	11.6846	4.30173	-1.48879	0.0138693	down	AT2G01650	plant UBX domain-containing protein 2
Ghir_A01G014970	0.376987	0.006359	-5.62902	0.00637592	down	AT1G13450	Homeodomain-like superfamily protein
Ghir_A01G017720	0.492372	0	-9.16434	3.85899e-08	down	AT1G09812	unknown protein; BEST Arabidopsis thaliana protein match is: unknown protein (TAIR:AT1G58007.2); Has 93 Blast hits to 93 proteins in 13 species: Archae - 0; Bacteria - 0; Metazoa - 0; Fungi - 0; Plants - 93; Viruses - 0; Other Eukaryotes - 0 (source: NCBI BLink).
Ghir_A01G019290	0.78827	0	-25.8769	0.000201565	down	AT3G54750	unknown protein; FUNCTIONS IN: molecular_function unknown; INVOLVED IN: biological_process unknown; LOCATED IN: cellular_component unknown; EXPRESSED IN: 24 plant structures; EXPRESSED DURING: 15 growth stages.
Ghir_A01G020830	0.071211	0	-5.45612	0.0029117	down	AT5G03120	unknown protein; FUNCTIONS IN: molecular_function unknown; INVOLVED IN: biological_process unknown; LOCATED IN: endomembrane system; EXPRESSED IN: 21 plant structures; EXPRESSED DURING: 13 growth stages; Has 14 Blast hits to 14 proteins in 4 species: Archae - 0; Bacteria - 0; Metazoa - 0; Fungi - 0; Plants - 14; Viruses - 0; Other Eukaryotes - 0 (source: NCBI BLink).
Ghir_A01G022340	0.072761	0	-6.14043	0.00596363	down	AT5G37070	Protein of unknown function, DUF538
Ghir_A02G000160	0	0.979329	32.508	2.73842e-06	up	AT2G37230	Tetratricopeptide repeat (TPR)-like superfamily protein
Ghir_A02G000790	0.033542	0.549123	3.52224	0.00552748	up	AT5G67480	BTB and TAZ domain protein 4
Ghir_A02G001450	0	1.32882	35.1722	7.56808e-16	up	AT3G59470	Far-red impaired responsive (FAR1) family protein
Ghir_A02G004900	0.002907	1.66005	8.13502	0.000551943	up	AT5G07900	Mitochondrial transcription termination factor family protein
Ghir_A02G005690	3.29856	7.13971	1.07618	0.0050406	up	AT5G65960	GTP binding
Ghir_A02G006140	0.04957	4.45179	6.39204	6.58332e-05	up	AT1G48280	hydroxyproline-rich glycoprotein family protein
Ghir_A02G006150	0.955305	0	-28.94	7.15447e-05	down	AT3G21760	UDP-Glycosyltransferase superfamily protein
Ghir_A02G007200	8.03134	24.9384	1.59995	0.0156356	up	AT1G76990	ACT domain repeat 3
Ghir_A02G010120	0.08574	0	-7.87863	0.00403625	down	AT4G10440	S-adenosyl-L-methionine-dependent methyltransferases superfamily protein
Ghir_A02G010860	3.91884	0	-26.0469	3.50246e-06	down	AT4G23850	AMP-dependent synthetase and ligase family protein
Ghir_A02G011320	0.19684	0	-28.8221	7.81411e-05	down	AT1G63980	D111/G-patch domain-containing protein
Ghir_A02G011620	0	0.673132	25.2861	7.69068e-06	up	AT3G10250	Plant protein 1589 of unknown function
Ghir_A02G014620	12.3743	5.3463	-1.26234	0.00448489	down
Ghir_A02G015490	0.09303	3.80325	5.2499	0.00981438	up
Ghir_A02G015600	0	1.52729	30.4845	1.85351e-05	up	AT4G17720	RNA-binding (RRM/RBD/RNP motifs) family protein
Ghir_A02G016720	0	0.371825	32.1862	3.55172e-06	up	AT3G49910	Translation protein SH3-like family protein
Ghir_A03G000310	1.8366	0.48054	-1.98348	0.000871596	down	AT1G32210	Defender against death (DAD family) protein
Ghir_A03G002900	0	0.014211	24.8914	6.77111e-06	up	AT1G55535	unknown protein; FUNCTIONS IN: molecular_function unknown; INVOLVED IN: biological_process unknown; LOCATED IN: cellular_component unknown; EXPRESSED IN: cultured cell; BEST Arabidopsis thaliana protein match is: unknown protein (TAIR:AT3G13420.1); Has 35333 Blast hits to 34131 proteins in 2444 species: Archae - 798; Bacteria - 22429; Metazoa - 974; Fungi - 991; Plants - 531; Viruses - 0; Other E…
Ghir_A03G018100	0.181527	1.94172	3.36203	0.000551943	up	AT3G21810	Zinc finger C-x8-C-x5-C-x3-H type family protein
Ghir_A03G019230	0	0.575633	26.1722	2.6369e-09	up	AT5G09420	translocon at the outer membrane of chloroplasts 64-V
Ghir_A03G020870	0.08976	0	-5.91941	0.018199	down	AT3G17840	receptor-like kinase 902
Ghir_A03G021830	0	0.459927	26.0862	5.47041e-05	up	AT1G32120	FUNCTIONS IN: molecular_function unknown; INVOLVED IN: biological_process unknown; LOCATED IN: membrane; EXPRESSED IN: 14 plant structures; EXPRESSED DURING: 4 anthesis, C globular stage, F mature embryo stage, petal differentiation and expansion stage, E expanded cotyledon stage; CONTAINS InterPro DOMAIN/s: Aminotransferase-like, plant mobile domain (InterPro:IPR019557), Protein of unknown funct…
Ghir_A03G022700	1.46344	9.95948	2.74234	0.0430959	up	AT2G17200	ubiquitin family protein
Ghir_A04G002070	0.306594	0	-22.7721	5.92421e-08	down	AT4G05320	polyubiquitin 10
Ghir_A04G002270	0	14.4489	12.7213	0.0178124	up	AT2G04890	SCARECROW-like 21
Ghir_A04G002990	0.052987	7.65158	7.0968	1.5172e-06	up	AT1G52980	GTP-binding family protein
Ghir_A04G003340	0	0.098443	43.9294	3.04063e-12	up	AT5G53870	early nodulin-like protein 1
Ghir_A04G003520	0	0.12229	24.5713	9.0128e-10	up	AT1G62930	Tetratricopeptide repeat (TPR)-like superfamily protein
Ghir_A04G006000	1.6871	0.288364	-2.56389	0.0246211	down	AT2G42140	VQ motif-containing protein
Ghir_A04G009910	1.76737	0	-33.996	5.7516e-07	down	AT3G51850	calcium-dependent protein kinase 13
Ghir_A04G013480	0.369678	0	-44.9773	5.05336e-68	down	AT4G39050	Kinesin motor family protein
Ghir_A05G003360	3.04112	0.001281	-10.5288	0.00239116	down	AT5G20610	unknown protein; BEST Arabidopsis thaliana protein match is: unknown protein (TAIR:AT5G26160.1); Has 918 Blast hits to 759 proteins in 180 species: Archae - 6; Bacteria - 105; Metazoa - 264; Fungi - 89; Plants - 167; Viruses - 5; Other Eukaryotes - 282 (source: NCBI BLink).
Ghir_A05G005170	0.00179	0.496909	6.80791	0.00319437	up	AT4G32660	Protein kinase superfamily protein
Ghir_A05G006080	1.92467	10.7836	2.44184	4.07993e-13	up	AT2G24270	aldehyde dehydrogenase 11A3
Ghir_A05G007730	0.341391	3.14697	3.16625	0.0178124	up	AT1G07910	RNAligase
Ghir_A05G009000	0.00713	1.78117	7.79022	7.62567e-05	up	AT2G29970	Double Clp-N motif-containing P-loop nucleoside triphosphate hydrolases superfamily protein
Ghir_A05G009870	0	0.889093	25.2312	0.00129793	up	AT2G37570	HSP20-like chaperones superfamily protein
Ghir_A05G010420	1.62684	5.04869	1.56379	0.00107796	up	AT5G21160	LA RNA-binding protein
Ghir_A05G010690	0	0.000527	15.1011	0.000279385	up	AT2G28260	cyclic nucleotide-gated channel 15
Ghir_A05G010710	0.402498	0	-35.5427	7.21746e-12	down	AT2G28250	Protein kinase superfamily protein
Ghir_A05G011730	0.091312	0	-21.5341	2.80887e-05	down	AT1G16860	Ubiquitin-specific protease family C19-related protein
Ghir_A05G012160	8.56753	2.68448	-1.7353	0.0268515	down	AT2G25070	Protein phosphatase 2C family protein
Ghir_A05G019400	0.299245	0	-26.3459	0.000588894	down	AT1G75430	BEL1-like homeodomain 11
Ghir_A05G022390	2.1696	0.027291	-6.26071	0.0201197	down	AT4G24530	O-fucosyltransferase family protein
Ghir_A05G022400	2.59135	0	-27.9129	0.000173253	down	AT1G09730	Cysteine proteinases superfamily protein
Ghir_A05G022920	0.082907	0.227749	1.40931	0.0155084	up	AT1G78280	transferases, transferring glycosyl groups
Ghir_A05G025390	0.131027	2.15251	3.92648	0.0438406	up	AT1G72020	unknown protein; Has 52 Blast hits to 52 proteins in 18 species: Archae - 0; Bacteria - 0; Metazoa - 0; Fungi - 0; Plants - 52; Viruses - 0; Other Eukaryotes - 0 (source: NCBI BLink).
Ghir_A05G025570	0.195682	0	-31.7501	5.40123e-06	down	AT1G72180	Leucine-rich receptor-like protein kinase family protein
Ghir_A05G030100	0.001214	0	-29.2469	7.95231e-05	down	AT3G09830	Protein kinase superfamily protein
Ghir_A05G030110	0	0.020096	27.4599	0.000260201	up	AT3G57120	Protein kinase superfamily protein
Ghir_A05G033410	0.260174	9.55375	5.13346	3.16798e-06	up	AT1G68370	Chaperone DnaJ-domain superfamily protein
Ghir_A05G035590	0	0.000363	16.1444	0.000596478	up	AT5G02950	Tudor/PWWP/MBT superfamily protein
Ghir_A05G036710	0.318218	0	-24.8661	0.00170999	down	AT5G13590	unknown protein; Has 150 Blast hits to 121 proteins in 42 species: Archae - 0; Bacteria - 8; Metazoa - 80; Fungi - 5; Plants - 17; Viruses - 0; Other Eukaryotes - 40 (source: NCBI BLink).
Ghir_A05G040310	0.333702	0	-25.7915	0.000871596	down	AT4G18530	Protein of unknown function (DUF707)
Ghir_A05G041480	1.46609	0	-11.1865	0.000272049	down	AT1G61670	Lung seven transmembrane receptor family protein
Ghir_A05G042810	0.051854	1.87485	5.03719	0.0422709	up	AT5G54130	Calcium-binding endonuclease/exonuclease/phosphatase family
Ghir_A06G000140	4.44314	0.91348	-2.34688	0.0344683	down	AT1G20225	Thioredoxin superfamily protein
Ghir_A06G000260	1.67518	0.001362	-9.84742	0.0144827	down	AT4G24190	Chaperone protein htpG family protein
Ghir_A06G001780	0.337131	7.1e-05	-9.08728	0.0451457	down	AT1G45231	S-adenosyl-L-methionine-dependent methyltransferases superfamily protein
Ghir_A06G004130	0.099338	0.009356	-3.56853	0.0451983	down
Ghir_A06G005110	7.09514	0.004431	-10.3713	1.99932e-06	down	AT5G35160	Endomembrane protein 70 protein family
Ghir_A06G006260	0.784415	0.011058	-6.07325	0.000150914	down	AT2G26910	pleiotropic drug resistance 4
Ghir_A06G006980	0	0.220002	9.1592	0.000500326	up	AT2G19950	golgin candidate 1
Ghir_A06G011090	0.054305	3.65732	5.97388	0.0376206	up	AT3G13570	SC35-like splicing factor 30A
Ghir_A06G011540	0.021203	0.996287	5.44375	0.000173253	up	AT5G49810	methionine S-methyltransferase
Ghir_A06G013260	0	0.889997	25.6607	0.000954941	up	AT1G28260	Telomerase activating protein Est1
Ghir_A06G018870	0.00197	0.726608	8.4807	2.82279e-12	up	AT5G06100	myb domain protein 33
Ghir_A06G019500	0.613357	5.3907	3.07801	0.00860909	up	AT5G36880	acetyl-CoA synthetase
Ghir_A06G019580	0.608305	0	-33.9865	1.14403e-09	down	AT1G30620	NAD(P)-binding Rossmann-fold superfamily protein
Ghir_A06G019930	43.462	22.2258	-1.01157	2.47725e-05	down	AT3G15820	phosphatidic acid phosphatase-related / PAP2-related
Ghir_A07G000660	0	0.210802	24.3973	1.0461e-12	up	AT4G32350	Regulator of Vps4 activity in the MVB pathway protein
Ghir_A07G001680	0.022199	1.69961	6.17906	0.00243982	up	AT3G14100	RNA-binding (RRM/RBD/RNP motifs) family protein
Ghir_A07G002780	2.40758	5.93811	1.26677	1.80636e-07	up	AT5G11520	aspartate aminotransferase 3
Ghir_A07G003200	12.0342	5.94561	-1.0707	0.0281381	down	AT2G24020	Uncharacterised BCR, YbaB family COG0718
Ghir_A07G003430	4.35984	10.2182	1.17328	0.00334453	up	AT2G25310	Protein of unknown function (DUF2012)
Ghir_A07G003600	0	2.85624	24.5779	0.000584099	up	AT2G32070	Polynucleotidyl transferase, ribonuclease H-like superfamily protein
Ghir_A07G006130	0.062271	2.57229	5.12578	0.0268357	up	AT4G24770	31-kDa RNA binding protein
Ghir_A07G009280	0	0.244282	32.3301	3.16798e-06	up	AT1G05010	ethylene-forming enzyme
Ghir_A07G017940	0.144579	0.758269	2.34714	0.0471072	up	AT2G04842	threonyl-tRNA synthetase, putative / threonine--tRNA ligase, putative
Ghir_A07G018170	0.006297	5.19055	9.53136	0.000534497	up	AT2G17630	Pyridoxal phosphate (PLP)-dependent transferases superfamily protein
Ghir_A07G020020	0	2.68508	11.8813	0.0492699	up	AT5G27260	unknown protein; BEST Arabidopsis thaliana protein match is: unknown protein (TAIR:AT2G29880.1); Has 1807 Blast hits to 1807 proteins in 277 species: Archae - 0; Bacteria - 0; Metazoa - 736; Fungi - 347; Plants - 385; Viruses - 0; Other Eukaryotes - 339 (source: NCBI BLink).
Ghir_A07G020260	0.078843	1.91648	4.53856	0.00410843	up
Ghir_A07G022590	0.303029	0.109542	-1.51029	0.030331	down	AT5G64560	magnesium transporter 9
Ghir_A08G000380	231.76	0.02151	-13.0113	3.51888e-08	down	AT5G02560	histone H2A 12
Ghir_A08G000390	280.733	0.198562	-10.54	7.27422e-07	down	AT5G02560	histone H2A 12
Ghir_A08G000790	0.702085	0	-24.5723	0.0020844	down	AT5G22780	Adaptor protein complex AP-2, alpha subunit
Ghir_A08G001380	0.017299	2.92094	7.2445	0.000838807	up	AT3G27830	ribosomal protein L12-A
Ghir_A08G002220	0.167314	4.58958	4.72245	0.00278682	up	AT5G58100	unknown protein; INVOLVED IN: pollen exine formation; EXPRESSED IN: 19 plant structures; EXPRESSED DURING: 8 growth stages; BEST Arabidopsis thaliana protein match is: unknown protein (TAIR:AT3G28720.1); Has 35333 Blast hits to 34131 proteins in 2444 species: Archae - 798; Bacteria - 22429; Metazoa - 974; Fungi - 991; Plants - 531; Viruses - 0; Other Eukaryotes - 9610 (source: NCBI BLink).
Ghir_A08G002310	0.088291	2.0597	4.43159	0.000542345	up	AT2G19170	subtilisin-like serine protease 3
Ghir_A08G003580	1.39645	0.443537	-1.70215	0.000630245	down	AT4G00090	Transducin/WD40 repeat-like superfamily protein
Ghir_A08G003990	0	0.157446	35.2398	1.23214e-09	up	AT3G02470	S-adenosylmethionine decarboxylase
Ghir_A08G005030	0	0.002104	20.0939	0.0383447	up	AT1G03060	Beige/BEACH domain ;WD domain, G-beta repeat protein
Ghir_A08G006790	0	0.145009	24.171	0.000846412	up	AT3G22970	Protein of unknown function (DUF506)
Ghir_A08G008240	0	1.56693	10.8204	0.0146133	up	AT1G02816	Protein of unknown function, DUF538
Ghir_A08G013370	0.037238	1.60742	5.36531	0.0495776	up	AT3G61710	AUTOPHAGY 6
Ghir_A08G013400	0	0.269647	23.4924	3.08658e-13	up	AT4G01050	thylakoid rhodanese-like
Ghir_A08G014270	0.443681	0.154024	-1.55027	0.0489028	down	AT2G45360	Protein of unknown function (DUF1442)
Ghir_A08G016640	0	0.040087	39.9526	3.54598e-18	up	AT4G17970	aluminum-activated, malate transporter 12
Ghir_A08G018570	0	0.291124	9.03817	0.0195596	up	AT4G11820	hydroxymethylglutaryl-CoA synthase / HMG-CoA synthase / 3-hydroxy-3-methylglutaryl coenzyme A synthase
Ghir_A08G021080	3.30402	0.086705	-5.29361	1.6577e-26	down	AT2G30090	Acyl-CoA N-acyltransferases (NAT) superfamily protein
Ghir_A08G021860	3.6e-05	0.815081	10.3517	7.17516e-07	up	AT1G09040	unknown protein; FUNCTIONS IN: molecular_function unknown; INVOLVED IN: biological_process unknown; LOCATED IN: membrane; EXPRESSED IN: leaf; BEST Arabidopsis thaliana protein match is: unknown protein (TAIR:AT1G09050.1); Has 614 Blast hits to 567 proteins in 104 species: Archae - 2; Bacteria - 12; Metazoa - 344; Fungi - 31; Plants - 81; Viruses - 0; Other Eukaryotes - 144 (source: NCBI BLink).
Ghir_A08G023840	0	0.957018	40.1408	6.52364e-16	up	AT3G24080	KRR1 family protein
Ghir_A08G023880	0.954163	0	-24.6519	0.0019692	down	AT5G36170	high chlorophyll fluorescent 109
Ghir_A08G024000	0.114611	2.15402	4.19456	0.0225424	up	AT3G17611	RHOMBOid-like protein 14
Ghir_A08G024610	0.061418	0	-31.3471	7.96233e-06	down	AT3G42170	BED zinc finger ;hAT family dimerisation domain
Ghir_A09G000310	0.252887	0	-22.9562	2.62576e-07	down	AT5G47860	Protein of unknown function (DUF1350)
Ghir_A09G001070	2.55736	14.2537	2.43839	0.00763429	up	AT3G29320	Glycosyl transferase, family 35
Ghir_A09G005430	7.2e-05	5.74027	7.94096	0.00118471	up
Ghir_A09G012400	1.22998	12.3962	3.24778	0.0249488	up	AT1G72040	P-loop containing nucleoside triphosphate hydrolases superfamily protein
Ghir_A09G013280	0.389129	0	-23.0621	2.758e-08	down	AT3G57630	exostosin family protein
Ghir_A09G014940	0.021294	0	-6.08373	0.0210067	down	AT3G52600	cell wall invertase 2
Ghir_A09G017620	1.23076	4.00407	1.65154	0.00020375	up	AT5G01620	TRICHOME BIREFRINGENCE-LIKE 35
Ghir_A09G019120	0.004218	0.074001	3.90931	0.0389724	up	AT5G53310	myosin heavy chain-related
Ghir_A09G021090	0.000599	0.657438	9.51826	0.00118471	up	AT2G33170	Leucine-rich repeat receptor-like protein kinase family protein
Ghir_A09G025270	1.18818	5.22206	2.07752	0.00334453	up	AT3G16630	P-loop containing nucleoside triphosphate hydrolases superfamily protein
Ghir_A10G000680	0.387301	1.53651	1.89497	0.00871316	up	AT3G21630	chitin elicitor receptor kinase 1
Ghir_A10G002440	23.7441	1.46753	-4.1449	0.0233031	down	AT5G44210	erf domain protein 9
Ghir_A10G003760	0	30.5493	31.5875	3.50246e-06	up	AT2G34480	Ribosomal protein L18ae/LX family protein
Ghir_A10G005540	0.009342	56.1401	12.3591	7.81411e-05	up	AT1G72970	Glucose-methanol-choline (GMC) oxidoreductase family protein
Ghir_A10G006440	0.281429	0	-29.1276	6.17916e-05	down	AT3G16260	tRNAse Z4
Ghir_A10G010460	0.019483	0	-5.13217	0.00672145	down	AT5G18840	Major facilitator superfamily protein
Ghir_A10G010640	3.06647	0.856605	-1.90974	0.00253246	down	AT3G23920	beta-amylase 1
Ghir_A10G010700	0.126928	0.401813	1.60679	0.000385278	up	AT5G43400	Uncharacterised conserved protein UCP015417, vWA
Ghir_A10G011910	2.46998	0.001113	-11.0427	0.0309181	down	AT3G06010	Homeotic gene regulator
Ghir_A10G013730	0	0.129037	23.0303	0.00100355	up	AT2G43160	ENTH/VHS family protein
Ghir_A10G013900	0.113177	2.39403	4.32118	0.0140851	up	AT3G59390	unknown protein; FUNCTIONS IN: molecular_function unknown; INVOLVED IN: biological_process unknown; LOCATED IN: endomembrane system; EXPRESSED IN: 22 plant structures; EXPRESSED DURING: 13 growth stages; CONTAINS InterPro DOMAIN/s: Protein of unknown function DUF2054 (InterPro:IPR019352); Has 184 Blast hits to 184 proteins in 72 species: Archae - 0; Bacteria - 0; Metazoa - 116; Fungi - 0; Plants …
Ghir_A10G013940	0	4.7987	40.3075	3.93481e-21	up	AT3G59420	crinkly4
Ghir_A10G013960	0	0.033129	30.2091	1.14403e-09	up	AT3G57880	Calcium-dependent lipid-binding (CaLB domain) plant phosphoribosyltransferase family protein
Ghir_A10G014040	6.79048	0.319818	-4.46416	0.00211539	down	AT3G59490	unknown protein; FUNCTIONS IN: molecular_function unknown; INVOLVED IN: biological_process unknown; EXPRESSED IN: 22 plant structures; EXPRESSED DURING: 13 growth stages; Has 30201 Blast hits to 17322 proteins in 780 species: Archae - 12; Bacteria - 1396; Metazoa - 17338; Fungi - 3422; Plants - 5037; Viruses - 0; Other Eukaryotes - 2996 (source: NCBI BLink).
Ghir_A10G016800	0.001134	1.081	7.50191	0.000556849	up	AT3G06890	unknown protein; Has 91 Blast hits to 91 proteins in 12 species: Archae - 0; Bacteria - 0; Metazoa - 0; Fungi - 0; Plants - 91; Viruses - 0; Other Eukaryotes - 0 (source: NCBI BLink).
Ghir_A10G021050	0	0.822196	40.0674	1.52044e-22	up	AT2G39220	PATATIN-like protein 6
Ghir_A11G001490	0.004413	0	-22.8323	0.000173253	down	AT5G24270	Calcium-binding EF-hand family protein
Ghir_A11G013100	0	0.159233	30.2943	2.21392e-05	up	AT3G63200	PATATIN-like protein 9
Ghir_A11G014210	0.105905	0.953178	3.11873	0.0012368	up	AT1G04090	Plant protein of unknown function (DUF946)
Ghir_A11G014480	0.934888	6.46854	2.76003	0.00777204	up	AT3G07030	Alba DNA/RNA-binding protein
Ghir_A11G021790	0.13844	0.006516	-4.38785	0.00890808	down	AT5G65340	Protein of unknown function, DUF617
Ghir_A11G023380	1.83887	0.394488	-2.28855	0.0410705	down	AT5G24010	Protein kinase superfamily protein
Ghir_A11G023430	74.9443	1.42812	-5.78605	0.0198987	down	AT4G37260	myb domain protein 73
Ghir_A11G028990	0	0.850388	26.2078	0.000644659	up	AT5G27730	Protein of unknown function (DUF1624)
Ghir_A11G031840	0.000785	0.979903	9.71923	0.0142948	up	AT1G56070	Ribosomal protein S5/Elongation factor G/III/V family protein
Ghir_A11G034040	0.02969	0	-21.9477	0.000165204	down	AT3G14470	NB-ARC domain-containing disease resistance protein
Ghir_A11G035400	0.331344	0.069684	-2.26386	0.00377632	down	AT5G05960	Bifunctional inhibitor/lipid-transfer protein/seed storage 2S albumin superfamily protein
Ghir_A12G009990	2.59422	0.053742	-5.66187	0.00055801	down	AT4G39690	FUNCTIONS IN: molecular_function unknown; INVOLVED IN: biological_process unknown; LOCATED IN: mitochondrion; EXPRESSED IN: 26 plant structures; EXPRESSED DURING: 14 growth stages; CONTAINS InterPro DOMAIN/s: Mitochondrial inner membrane protein Mitofilin (InterPro:IPR019133); Has 30201 Blast hits to 17322 proteins in 780 species: Archae - 12; Bacteria - 1396; Metazoa - 17338; Fungi - 3422; Plant…
Ghir_A12G013150	0.093116	15.8123	7.39297	0.000686798	up	AT5G26751	shaggy-related kinase 11
Ghir_A12G015630	0.357966	7.49503	4.34804	0.0130676	up	AT2G42490	Copper amine oxidase family protein
Ghir_A12G018670	0.165173	0.006502	-4.77352	0.0383058	down	AT2G02870	Galactose oxidase/kelch repeat superfamily protein
Ghir_A12G018870	0.040066	11.001	7.88192	0.00112109	up	AT4G19840	phloem protein 2-A1
Ghir_A12G018880	3.49896	12.2856	1.74954	2.34952e-07	up	AT3G47500	cycling DOF factor 3
Ghir_A12G019220	0.485015	0	-25.6653	0.000954941	down	AT5G07920	diacylglycerol kinase1
Ghir_A12G020070	0.435439	0	-25.7312	0.000630245	down	AT5G50390	Pentatricopeptide repeat (PPR-like) superfamily protein
Ghir_A12G022270	0	0.447623	37.4205	1.03134e-20	up	AT5G46580	pentatricopeptide (PPR) repeat-containing protein
Ghir_A12G022300	0	0.339938	8.93641	0.000801548	up	AT2G01050	zinc ion binding;nucleic acid binding
Ghir_A12G024510	2.37977	102.459	5.31156	0.0178124	up	AT4G11280	1-aminocyclopropane-1-carboxylic acid (acc) synthase 6
Ghir_A12G025020	0.487808	0	-25.8118	9.63805e-05	down	AT2G24200	Cytosol aminopeptidase family protein
Ghir_A12G026280	0.188839	0	-29.715	3.76173e-05	down	AT4G00990	Transcription factor jumonji (jmjC) domain-containing protein
Ghir_A12G027650	0.006944	0	-22.3737	0.00956457	down	AT5G62190	DEAD box RNA helicase (PRH75)
Ghir_A13G000270	0.252027	0.022254	-3.44242	0.0275842	down	AT2G41310	response regulator 3
Ghir_A13G001210	0.199005	26.4183	6.9994	0.00946679	up	AT2G41430	dehydration-induced protein (ERD15)
Ghir_A13G002540	0.127662	0.72623	2.47892	0.00140375	up	AT2G01818	PLATZ transcription factor family protein
Ghir_A13G003160	0.123811	1.3401	3.43758	0.0198987	up	AT2G16250	Leucine-rich repeat protein kinase family protein
Ghir_A13G006870	13.0178	4.57216	-1.55059	0.0366282	down	AT4G33510	3-deoxy-d-arabino-heptulosonate 7-phosphate synthase
Ghir_A13G010830	0.545309	0.011127	-5.37374	0.0289972	down	AT3G56070	rotamase cyclophilin 2
Ghir_A13G011860	0	0.593203	25.4639	0.00110929	up	AT1G09300	Metallopeptidase M24 family protein
Ghir_A13G013590	378.833	9.5923	-5.36038	0.000148963	down	AT5G56000	HEAT SHOCK PROTEIN 81.4
Ghir_A13G014750	0.397867	36.4208	6.42816	0.0382626	up	AT4G05320	polyubiquitin 10
Ghir_A13G014980	5.48156	0	-27.437	0.000254699	down	AT1G11360	Adenine nucleotide alpha hydrolases-like superfamily protein
Ghir_A13G015190	0.001059	2.64432	10.6581	0.0230437	up	AT3G15410	Leucine-rich repeat (LRR) family protein
Ghir_A13G016230	0	0.241622	24.4317	1.7209e-06	up	AT5G56270	WRKY DNA-binding protein 2
Ghir_A13G020160	2.9909	0.081244	-5.26004	0.0165844	down	AT1G73430	sec34-like family protein
Ghir_A13G021240	8.25123	0.246679	-5.04782	0.000705688	down	AT5G20190	Tetratricopeptide repeat (TPR)-like superfamily protein
Ghir_A13G022890	0.004639	0	-24.3535	0.00278008	down	AT5G12870	myb domain protein 46
Ghir_A13G023220	1.54545	0.113388	-3.82491	0.0315931	down	AT2G26920	Ubiquitin-associated/translation elongation factor EF1B protein
Ghir_A13G023550	0.444731	0	-25.5338	1.25538e-08	down	AT3G44460	Basic-leucine zipper (bZIP) transcription factor family protein
Ghir_D01G000570	3.70358	0.00193	-10.4429	0.00721283	down	AT1G10950	transmembrane nine 1
Ghir_D01G001580	0.125911	3.32761	4.70836	0.0463913	up	AT3G21820	histone-lysine N-methyltransferase ATXR2
Ghir_D01G004480	1.01215	5.52992	2.38452	1.12546e-08	up	AT1G16970	KU70 homolog
Ghir_D01G008000	0.21997	0	-27.6727	6.62338e-12	down	AT5G55500	beta-1,2-xylosyltransferase
Ghir_D01G008420	0.38113	0	-8.83781	0.00300997	down	AT5G55630	Outward rectifying potassium channel protein
Ghir_D01G008590	0	0.091014	26.9897	3.86835e-05	up	AT3G13180	NOL1/NOP2/sun family protein / antitermination NusB domain-containing protein
Ghir_D01G011130	1.38206	0.105012	-3.74227	0.0223838	down	ATCG00480	ATP synthase subunit beta
Ghir_D01G015820	0.298552	0.002491	-6.49867	0.00275208	down	AT1G70940	Auxin efflux carrier family protein
Ghir_D01G015920	0.358586	2.18011	2.53437	0.037327	up	AT1G23030	ARM repeat superfamily protein
Ghir_D01G017250	0.05576	0	-6.48526	0.0438886	down	AT4G34880	Amidase family protein
Ghir_D01G018240	0.028322	0	-5.80275	0.0176257	down	AT1G20550	O-fucosyltransferase family protein
Ghir_D01G022180	0	0.629559	29.9595	2.99921e-05	up	AT2G36960	TSL-kinase interacting protein 1
Ghir_D01G023880	1.35264	2.91254	1.06072	0.00468503	up	AT5G01590	unknown protein; FUNCTIONS IN: molecular_function unknown; INVOLVED IN: biological_process unknown; LOCATED IN: chloroplast, chloroplast envelope; EXPRESSED IN: 22 plant structures; EXPRESSED DURING: 13 growth stages; Has 60 Blast hits to 59 proteins in 31 species: Archae - 0; Bacteria - 20; Metazoa - 1; Fungi - 2; Plants - 33; Viruses - 0; Other Eukaryotes - 4 (source: NCBI BLink).
Ghir_D01G024060	1.54266	0.231816	-2.81317	0.0299382	down	AT4G10320	tRNA synthetase class I (I, L, M and V) family protein
Ghir_D02G002200	11.2694	0.793152	-3.82526	0.00334453	down	AT4G15550	indole-3-acetate beta-D-glucosyltransferase
Ghir_D02G002350	0.007326	0.26039	4.83094	0.00195179	up	AT4G13940	S-adenosyl-L-homocysteine hydrolase
Ghir_D02G002540	0.078274	0	-5.62937	0.00698988	down	AT1G26800	RING/U-box superfamily protein
Ghir_D02G005180	0.080279	0	-7.95464	0.025567	down	AT3G21430	DNA binding
Ghir_D02G013370	0.183674	0	-22.2279	5.60113e-16	down	AT1G13700	6-phosphogluconolactonase 1
Ghir_D02G018310	0	0.050965	21.8418	0.00650791	up	AT1G28130	Auxin-responsive GH3 family protein
Ghir_D02G019530	322.529	0	-31.4475	2.55546e-21	down	AT4G14320	Zinc-binding ribosomal protein family protein
Ghir_D02G021260	4.085	0.712819	-2.56622	2.80954e-32	down	AT4G33770	Inositol 1,3,4-trisphosphate 5/6-kinase family protein
Ghir_D02G021970	0	0.002822	16.897	5.68505e-05	up	AT3G19320	Leucine-rich repeat (LRR) family protein
Ghir_D03G000830	0	0.122014	8.8088	0.00699478	up	AT2G17820	histidine kinase 1
Ghir_D03G000850	0	0.151085	23.4195	1.64548e-09	up	AT5G66150	Glycosyl hydrolase family 38 protein
Ghir_D03G001680	0.012165	1.55747	6.74653	0.0029117	up	AT2G18630	Protein of unknown function (DUF677)
Ghir_D03G004060	0	0.774826	11.1449	2.17181e-05	up	AT5G65300	unknown protein; Has 30201 Blast hits to 17322 proteins in 780 species: Archae - 12; Bacteria - 1396; Metazoa - 17338; Fungi - 3422; Plants - 5037; Viruses - 0; Other Eukaryotes - 2996 (source: NCBI BLink).
Ghir_D03G006590	0	0.793707	32.1382	3.6888e-06	up	AT1G21840	urease accessory protein F
Ghir_D03G007800	3.74681	16.6089	2.09475	0.0310455	up	AT3G10300	Calcium-binding EF-hand family protein
Ghir_D03G008620	0.17749	0.050428	-1.86073	0.0142948	down	AT1G64065	Late embryogenesis abundant (LEA) hydroxyproline-rich glycoprotein family
Ghir_D03G009260	1.40413	0	-35.6266	2.59615e-17	down	AT3G61920	unknown protein; FUNCTIONS IN: molecular_function unknown; INVOLVED IN: N-terminal protein myristoylation; LOCATED IN: cellular_component unknown; EXPRESSED IN: shoot, hypocotyl, root, egg cell; BEST Arabidopsis thaliana protein match is: unknown protein (TAIR:AT1G64700.1); Has 77 Blast hits to 77 proteins in 8 species: Archae - 0; Bacteria - 0; Metazoa - 0; Fungi - 0; Plants - 77; Viruses - 0; O…
Ghir_D03G012470	8.13692	17.8943	1.08405	0.0165844	up	AT3G48730	glutamate-1-semialdehyde 2,1-aminomutase 2
Ghir_D03G014160	0	0.199005	24.4414	3.01737e-10	up	AT5G59900	Pentatricopeptide repeat (PPR) superfamily protein
Ghir_D03G015180	12.9187	0.01077	-10.0902	3.14316e-06	down	AT5G60800	Heavy metal transport/detoxification superfamily protein
Ghir_D03G016140	0.173382	4.22233	4.5815	0.00126299	up	AT2G32080	purin-rich alpha 1
Ghir_D03G017410	0.062231	0	-6.14701	0.0142948	down	AT4G12350	myb domain protein 42
Ghir_D04G000370	0.009995	0	-17.6273	2.94975e-06	down	AT3G07950	rhomboid protein-related
Ghir_D04G001370	5.76031	0.892435	-2.70657	0.00188682	down	AT2G40620	Basic-leucine zipper (bZIP) transcription factor family protein
Ghir_D04G002170	3.70689	7.72447	1.01171	0.00402366	up	AT5G26710	Glutamyl/glutaminyl-tRNA synthetase, class Ic
Ghir_D04G004090	0.161935	0	-23.4136	0.00447557	down	AT3G42170	BED zinc finger ;hAT family dimerisation domain
Ghir_D04G004720	0	0.059312	20.4388	5.12176e-14	up	AT3G02090	Insulinase (Peptidase family M16) protein
Ghir_D04G007690	0.420939	0.099061	-2.11108	0.0177581	down	AT2G16770	Basic-leucine zipper (bZIP) transcription factor family protein
Ghir_D04G011360	2.16892	29.3311	3.73919	6.31848e-05	up	AT2G36460	Aldolase superfamily protein
Ghir_D04G012710	0.084105	4.29353	5.61027	0.038336	up	AT2G37380	unknown protein; BEST Arabidopsis thaliana protein match is: unknown protein (TAIR:AT2G39370.1); Has 1284 Blast hits to 422 proteins in 114 species: Archae - 0; Bacteria - 90; Metazoa - 125; Fungi - 151; Plants - 136; Viruses - 0; Other Eukaryotes - 782 (source: NCBI BLink).
Ghir_D04G012830	0.124329	0.61819	2.24141	0.00137861	up	AT5G02580	Plant protein 1589 of unknown function
Ghir_D04G018650	0.419811	0	-31.5251	6.77111e-06	down	AT2G14530	TRICHOME BIREFRINGENCE-LIKE 13
Ghir_D04G018670	0.62935	0	-35.3369	1.46457e-07	down	AT2G14530	TRICHOME BIREFRINGENCE-LIKE 13
Ghir_D05G007240	2.69149	6.39111	1.21062	0.00748732	up	AT4G36250	aldehyde dehydrogenase 3F1
Ghir_D05G007480	0.620631	0.013162	-5.45749	0.0378198	down	AT2G26920	Ubiquitin-associated/translation elongation factor EF1B protein
Ghir_D05G009800	1.19958	0.005595	-7.49213	0.00681853	down	AT3G46220	unknown protein; CONTAINS InterPro DOMAIN/s: Protein of unknown function DUF2042 (InterPro:IPR018611); Has 559 Blast hits to 533 proteins in 154 species: Archae - 3; Bacteria - 32; Metazoa - 305; Fungi - 42; Plants - 50; Viruses - 3; Other Eukaryotes - 124 (source: NCBI BLink).
Ghir_D05G010460	0	0.039501	27.8311	0.000184169	up	AT1G08060	ATP-dependent helicase family protein
Ghir_D05G012040	0.36245	2.01245	2.42716	0.0146133	up	AT1G80830	natural resistance-associated macrophage protein 1
Ghir_D05G012090	0.154783	1.85962	3.55983	0.00814139	up	AT1G15870	Mitochondrial glycoprotein family protein
Ghir_D05G012610	1.07628	0.000397	-10.3242	0.0348752	down	AT1G15420	CONTAINS InterPro DOMAIN/s: Small-subunit processome, Utp12 (InterPro:IPR007148); Has 764 Blast hits to 656 proteins in 193 species: Archae - 0; Bacteria - 42; Metazoa - 237; Fungi - 154; Plants - 85; Viruses - 23; Other Eukaryotes - 223 (source: NCBI BLink).
Ghir_D05G016790	7.44173	0	-27.1539	3.1731e-08	down	AT4G21580	oxidoreductase, zinc-binding dehydrogenase family protein
Ghir_D05G018920	0	1.34674	26.3661	0.000584099	up
Ghir_D05G019870	0	0.107033	7.93616	0.00927404	up
Ghir_D05G020220	0	0.253261	22.6727	0.00745363	up	AT2G26490	Transducin/WD40 repeat-like superfamily protein
Ghir_D05G020530	0.385895	2.2434	2.48719	0.010845	up	AT4G11800	Calcineurin-like metallo-phosphoesterase superfamily protein
Ghir_D05G021910	1.62352	0	-10.2554	0.000801548	down	AT5G39600	CONTAINS InterPro DOMAIN/s: Ribosomal protein L53, mitochondrial (InterPro:IPR019716); Has 50 Blast hits to 50 proteins in 19 species: Archae - 0; Bacteria - 0; Metazoa - 6; Fungi - 0; Plants - 42; Viruses - 0; Other Eukaryotes - 2 (source: NCBI BLink).
Ghir_D05G022830	0.007351	0.971869	6.7659	4.7941e-11	up	AT1G78280	transferases, transferring glycosyl groups
Ghir_D05G022870	3.71146	15.4393	2.00019	0.00377632	up	AT5G64260	EXORDIUM like 2
Ghir_D05G023720	0.017046	2.36316	6.82193	0.00378581	up	AT1G44835	YbaK/aminoacyl-tRNA synthetase-associated domain
Ghir_D05G026090	0.010062	1.1253	6.64277	0.0165355	up	AT1G75660	5'-3' exoribonuclease 3
Ghir_D05G028700	0.003457	0	-16.8011	3.20166e-05	down	AT5G57655	xylose isomerase family protein
Ghir_D05G029470	1.21098	5.97769	2.23163	5.45172e-05	up	AT5G03730	Protein kinase superfamily protein
Ghir_D05G029490	0	1.40067	25.2105	0.0013151	up	AT4G40045	unknown protein; Has 30201 Blast hits to 17322 proteins in 780 species: Archae - 12; Bacteria - 1396; Metazoa - 17338; Fungi - 3422; Plants - 5037; Viruses - 0; Other Eukaryotes - 2996 (source: NCBI BLink).
Ghir_D05G033620	0.008836	1.01528	6.57616	0.00098801	up	AT3G23910	BEST Arabidopsis thaliana protein match is: RNA-directed DNA polymerase (reverse transcriptase)-related family protein (TAIR:AT3G24255.2); Has 562 Blast hits to 532 proteins in 147 species: Archae - 28; Bacteria - 51; Metazoa - 157; Fungi - 82; Plants - 85; Viruses - 6; Other Eukaryotes - 153 (source: NCBI BLink).
Ghir_D05G035270	0.174547	0	-23.6513	0.00380066	down	AT3G15030	TCP family transcription factor 4
Ghir_D05G038580	0.329176	0	-23.0029	1.88038e-07	down	AT1G48410	Stabilizer of iron transporter SufD / Polynucleotidyl transferase
Ghir_D06G004650	0.839735	5.02128	2.54457	0.00728478	up	AT1G77620	P-loop containing nucleoside triphosphate hydrolases superfamily protein
Ghir_D06G006390	0	0.135545	21.7848	0.000333789	up	AT5G25510	Protein phosphatase 2A regulatory B subunit family protein
Ghir_D06G007630	0	0.370258	10.3041	0.0391015	up	AT3G13690	Protein kinase protein with adenine nucleotide alpha hydrolases-like domain
Ghir_D06G011180	0	0.377246	24.1165	2.31701e-09	up	AT4G31880	LOCATED IN: cytosol; EXPRESSED IN: 24 plant structures; EXPRESSED DURING: 14 growth stages; BEST Arabidopsis thaliana protein match is: Tudor/PWWP/MBT superfamily protein (TAIR:AT1G15940.1).
Ghir_D06G011740	0.847412	8.99048	3.35016	3.46776e-07	up	AT2G24520	H(+)-ATPase 5
Ghir_D06G012250	3.83331	0	-27.0995	1.42555e-05	down	AT2G40840	disproportionating enzyme 2
Ghir_D06G015130	0.001492	1.8029	8.90621	0.00131673	up	AT5G45700	Haloacid dehalogenase-like hydrolase (HAD) superfamily protein
Ghir_D06G016310	0.000395	0.432221	8.98997	0.00296484	up	AT3G14075	Mono-/di-acylglycerol lipase, N-terminal;Lipase, class 3
Ghir_D06G017420	0	0.119498	6.30022	0.00233416	up
Ghir_D06G020640	0.019666	0.321778	3.87542	0.0376936	up	AT5G36880	acetyl-CoA synthetase
Ghir_D06G020920	0.01556	0	-26.4652	7.96794e-14	down	AT1G78955	camelliol C synthase 1
Ghir_D06G021910	5.75035	0	-12.4008	5.68505e-05	down	AT3G14180	sequence-specific DNA binding transcription factors
Ghir_D07G000640	3.71078	1.65569	-1.20646	0.00627354	down	AT1G55205	unknown protein; FUNCTIONS IN: molecular_function unknown; INVOLVED IN: biological_process unknown; LOCATED IN: chloroplast; BEST Arabidopsis thaliana protein match is: unknown protein (TAIR:AT3G13674.1); Has 137 Blast hits to 137 proteins in 11 species: Archae - 0; Bacteria - 0; Metazoa - 0; Fungi - 0; Plants - 137; Viruses - 0; Other Eukaryotes - 0 (source: NCBI BLink).
Ghir_D07G003170	0.058861	0	-19.6908	0.0470936	down	AT4G30600	signal recognition particle receptor alpha subunit family protein
Ghir_D07G003290	0.163601	3.04839	4.15048	0.0134924	up	AT4G32330	TPX2 (targeting protein for Xklp2) protein family
Ghir_D07G003630	0.617639	0	-24.83	0.00175403	down	AT4G31880	LOCATED IN: cytosol; EXPRESSED IN: 24 plant structures; EXPRESSED DURING: 14 growth stages; BEST Arabidopsis thaliana protein match is: Tudor/PWWP/MBT superfamily protein (TAIR:AT1G15940.1).
Ghir_D07G005260	0	0.103863	21.0701	4.95567e-05	up	AT5G61865	unknown protein; Has 30201 Blast hits to 17322 proteins in 780 species: Archae - 12; Bacteria - 1396; Metazoa - 17338; Fungi - 3422; Plants - 5037; Viruses - 0; Other Eukaryotes - 2996 (source: NCBI BLink).
Ghir_D07G006170	0.123765	1.03276	2.95321	0.000520209	up	AT3G26170	cytochrome P450, family 71, subfamily B, polypeptide 19
Ghir_D07G009350	1.17711	0	-37.29	1.56546e-08	down	AT3G21630	chitin elicitor receptor kinase 1
Ghir_D07G011900	0.074308	0.004962	-3.79929	0.00222844	down	AT2G27350	OTU-like cysteine protease family protein
Ghir_D07G013020	0.040208	1.13898	4.67289	0.00838736	up	AT4G03250	Homeodomain-like superfamily protein
Ghir_D07G015730	0	0.577752	24.2835	0.00253246	up	AT2G45630	D-isomer specific 2-hydroxyacid dehydrogenase family protein
Ghir_D07G016980	2.11029	0.979977	-1.14786	0.00397	down	AT5G48850	Tetratricopeptide repeat (TPR)-like superfamily protein
Ghir_D07G022230	0	0.192534	25.926	1.07684e-15	up	AT5G46050	peptide transporter 3
Ghir_D07G023710	0.001496	0.181289	6.25129	0.0163162	up	AT3G01480	cyclophilin 38
Ghir_D07G024050	0	0.606157	12.1247	0.000339889	up	AT5G40450	unknown protein; FUNCTIONS IN: molecular_function unknown; INVOLVED IN: biological_process unknown; LOCATED IN: chloroplast, plasma membrane; EXPRESSED IN: 24 plant structures; EXPRESSED DURING: 13 growth stages; Has 30201 Blast hits to 17322 proteins in 780 species: Archae - 12; Bacteria - 1396; Metazoa - 17338; Fungi - 3422; Plants - 5037; Viruses - 0; Other Eukaryotes - 2996 (source: NCBI BLin…
Ghir_D08G001060	3.94057	1.61122	-1.33918	0.00871316	down
Ghir_D08G001790	0.964159	6.40179	2.68316	4.68179e-06	up	AT5G13020	Emsy N Terminus (ENT)/ plant Tudor-like domains-containing protein
Ghir_D08G003000	0.001429	2.0368	9.86778	0.00152462	up	AT4G26910	Dihydrolipoamide succinyltransferase
Ghir_D08G003240	1.3911	0	-12.4075	0.000465533	down	AT5G56250	hapless 8
Ghir_D08G006260	0	2.33934	9.70285	0.0258369	up	AT2G44640	FUNCTIONS IN: molecular_function unknown; INVOLVED IN: biological_process unknown; LOCATED IN: mitochondrion, chloroplast, plasma membrane, plastid, chloroplast envelope; EXPRESSED IN: 23 plant structures; EXPRESSED DURING: 13 growth stages; CONTAINS InterPro DOMAIN/s: Protein of unknown function DUF3769 (InterPro:IPR022244); BEST Arabidopsis thaliana protein match is: pigment defective 320 (TAIR…
Ghir_D08G006300	0.090974	1.76141	4.22896	0.0210995	up	AT2G44670	Protein of unknown function (DUF581)
Ghir_D08G008290	0	3.46	25.7517	0.0008919	up	AT1G02816	Protein of unknown function, DUF538
Ghir_D08G008840	0	0.003202	23.6985	0.00473023	up	AT5G20500	Glutaredoxin family protein
Ghir_D08G011790	0.440538	14.6907	5.05054	0.00377632	up	AT1G32920	unknown protein; FUNCTIONS IN: molecular_function unknown; INVOLVED IN: response to wounding; LOCATED IN: endomembrane system; EXPRESSED IN: 23 plant structures; EXPRESSED DURING: 13 growth stages; BEST Arabidopsis thaliana protein match is: unknown protein (TAIR:AT1G32928.1); Has 42 Blast hits to 42 proteins in 8 species: Archae - 0; Bacteria - 0; Metazoa - 0; Fungi - 0; Plants - 42; Viruses - 0…
Ghir_D08G011800	0.719034	85.4769	6.80794	5.08455e-05	up	AT1G32900	UDP-Glycosyltransferase superfamily protein
Ghir_D08G018270	0.014542	0.84859	5.65078	0.0389724	up	AT4G17510	ubiquitin C-terminal hydrolase 3
Ghir_D08G021550	0.350369	35.6517	6.58058	0.000486914	up	AT2G28380	dsRNA-binding protein 2
Ghir_D08G023220	0.129613	4.28327	5.00427	0.0310455	up	AT3G04740	RNA polymerase II transcription mediators
Ghir_D09G000460	1.6611	0.736587	-1.2145	0.025567	down
Ghir_D09G007220	0.063506	2.18934	4.9883	0.00714426	up	AT3G17430	Nucleotide-sugar transporter family protein
Ghir_D09G008710	0.414473	2.55647	2.50797	0.0174792	up	AT3G27520	unknown protein; Has 28 Blast hits to 28 proteins in 10 species: Archae - 0; Bacteria - 0; Metazoa - 0; Fungi - 0; Plants - 28; Viruses - 0; Other Eukaryotes - 0 (source: NCBI BLink).
Ghir_D09G010660	5.62765	18.5831	1.68831	0.0333633	up	AT1G08470	strictosidine synthase-like 3
Ghir_D09G011440	0.710583	0	-23.6261	0.00385644	down	AT1G51510	RNA-binding (RRM/RBD/RNP motifs) family protein
Ghir_D09G013420	0.135534	2.07129	3.88305	0.0476577	up	AT3G11960	Cleavage and polyadenylation specificity factor (CPSF) A subunit protein
Ghir_D09G015070	0.013529	0	-19.2885	0.0261656	down	AT4G34340	TBP-associated factor 8
Ghir_D09G015410	0.126225	0	-25.8061	0.000867708	down	AT2G37150	RING/U-box superfamily protein
Ghir_D09G016010	0	0.650096	22.1568	0.0104625	up	AT2G28840	XB3 ortholog 1 in Arabidopsis thaliana
Ghir_D10G000120	0.708053	0	-24.1707	0.00273872	down	AT1G79000	histone acetyltransferase of the CBP family 1
Ghir_D10G001750	0.036109	1.77202	5.50294	0.00184511	up	AT3G20530	Protein kinase superfamily protein
Ghir_D10G004100	0.003126	0.603023	7.11065	0.0135985	up	AT5G45780	Leucine-rich repeat protein kinase family protein
Ghir_D10G004410	3.08573	0.025637	-6.93265	0.000385278	down	AT4G18240	starch synthase 4
Ghir_D10G004420	0	7.91935	26.5024	1.19285e-19	up	AT2G34430	light-harvesting chlorophyll-protein complex II subunit B1
Ghir_D10G008560	7.35468	0	-26.7752	7.59525e-17	down	AT5G14030	translocon-associated protein beta (TRAPB) family protein
Ghir_D10G012090	0.232807	0	-26.0413	3.0912e-09	down	AT3G08600	Protein of unknown function (DUF1191)
Ghir_D10G025740	0.054837	1.0212	4.07236	0.0027457	up	AT1G07400	HSP20-like chaperones superfamily protein
Ghir_D10G025790	0.399123	0	-9.39084	0.00272273	down	AT4G12560	F-box and associated interaction domains-containing protein
Ghir_D10G027700	2.71633	0	-31.2327	8.7835e-06	down	AT3G48050	BAH domain ;TFIIS helical bundle-like domain
Ghir_D11G000870	0.238053	0	-7.96781	0.00243982	down
Ghir_D11G003360	0	0.164093	22.1721	3.81027e-18	up	AT1G18890	calcium-dependent protein kinase 1
Ghir_D11G007330	0	1.63643	26.2443	0.000630245	up	AT5G14720	Protein kinase superfamily protein
Ghir_D11G007360	1.02538	0	-34.0512	5.48803e-07	down	AT5G40270	HD domain-containing metal-dependent phosphohydrolase family protein
Ghir_D11G010250	6.34121	0	-35.1738	1.70541e-07	down	AT4G01070	UDP-Glycosyltransferase superfamily protein
Ghir_D11G015080	0	0.173331	8.55788	0.00201977	up	AT3G07340	basic helix-loop-helix (bHLH) DNA-binding superfamily protein
Ghir_D11G016890	0	0.06493	6.76304	0.0189926	up	AT1G13680	PLC-like phosphodiesterases superfamily protein
Ghir_D11G017690	0.115225	0	-19.2331	0.000392634	down	AT5G17380	Thiamine pyrophosphate dependent pyruvate decarboxylase family protein
Ghir_D11G017940	0.067232	0	-47.4219	2.51858e-47	down	AT5G37310	Endomembrane protein 70 protein family
Ghir_D11G018680	1.17784	0	-10.982	0.00340377	down	AT5G66230	Chalcone-flavanone isomerase family protein
Ghir_D11G020840	0.886608	0	-24.3868	0.00238794	down	AT5G67230	Nucleotide-diphospho-sugar transferases superfamily protein
Ghir_D11G021100	1.35887	0	-24.73	0.00188016	down	AT2G23150	natural resistance-associated macrophage protein 3
Ghir_D11G029040	0.64313	0.271133	-1.30361	0.033916	down	AT5G27670	histone H2A 7
Ghir_D11G035050	30.638	1.89726	-4.09925	0.00860909	down	ATCG01110	NAD(P)H dehydrogenase subunit H
Ghir_D11G035230	0.540007	13.302	4.5709	0.0279211	up	AT2G36060	MMS ZWEI homologue 3
Ghir_D11G035340	2.66452	6.47431	1.21696	0.00616415	up	AT3G52750	Tubulin/FtsZ family protein
Ghir_D11G035390	0.027993	18.5275	9.26446	0.000520209	up
Ghir_D11G036580	4.11025	0.736783	-2.50336	0.0442605	down
Ghir_D12G001450	0	0.206948	29.0887	6.31848e-05	up	AT1G22040	Galactose oxidase/kelch repeat superfamily protein
Ghir_D12G002180	4.1895	8.98839	1.04987	5.03653e-07	up	AT1G49820	S-methyl-5-thioribose kinase
Ghir_D12G005470	0	0.761836	22.7099	2.69542e-12	up	AT5G16120	alpha/beta-Hydrolases superfamily protein
Ghir_D12G007230	0	0.77043	25.154	0.00136497	up	AT5G66850	mitogen-activated protein kinase kinase kinase 5
Ghir_D12G007530	0.430479	0	-23.9913	1.19195e-13	down	AT2G40980	Protein kinase superfamily protein
Ghir_D12G010290	0.001581	0	-33.8076	5.73385e-13	down	AT5G21080	Uncharacterized protein
Ghir_D12G012670	1.41727	0	-23.8665	2.22543e-06	down	AT4G00850	GRF1-interacting factor 3
Ghir_D12G013670	13.4762	0.971783	-3.89558	0.0184337	down	AT3G62420	basic region/leucine zipper motif 53
Ghir_D12G014130	0.040526	0	-40.9469	5.04256e-35	down	AT1G02816	Protein of unknown function, DUF538
Ghir_D12G014420	0	0.209876	30.9693	1.14746e-05	up	AT3G19960	myosin 1
Ghir_D12G018830	0.642134	0	-23.9775	7.81411e-05	down	AT3G01280	voltage dependent anion channel 1
Ghir_D12G020560	12.0172	5.00284	-1.29609	0.000207108	down	AT3G48710	DEK domain-containing chromatin associated protein
Ghir_D12G021760	0	0.098864	8.00708	0.0489259	up	AT3G07040	NB-ARC domain-containing disease resistance protein
Ghir_D12G022170	0.050656	1.33674	4.59128	0.0146133	up	AT3G02890	RING/FYVE/PHD zinc finger superfamily protein
Ghir_D12G023550	0.253583	2.07171	2.96095	0.0471472	up	AT1G12430	armadillo repeat kinesin 3
Ghir_D12G027400	0.012227	2.55149	7.60915	1.78408e-07	up	AT5G62090	SEUSS-like 2
Ghir_D12G029340	1.67736	4.14606	1.23504	0.0131793	up	AT5G61820	FUNCTIONS IN: molecular_function unknown; INVOLVED IN: biological_process unknown; LOCATED IN: vacuole; EXPRESSED IN: 24 plant structures; EXPRESSED DURING: 15 growth stages; CONTAINS InterPro DOMAIN/s: Stress up-regulated Nod 19 (InterPro:IPR011692); Has 30201 Blast hits to 17322 proteins in 780 species: Archae - 12; Bacteria - 1396; Metazoa - 17338; Fungi - 3422; Plants - 5037; Viruses - 0; Oth…
Ghir_D13G001750	32.4086	14.2249	-1.24357	0.00253246	down	AT3G11210	SGNH hydrolase-type esterase superfamily protein
Ghir_D13G001790	0.002178	0	-25.0096	0.00189905	down	AT4G29090	Ribonuclease H-like superfamily protein
Ghir_D13G004080	0.005309	0.173113	4.71295	0.0130676	up	AT4G34020	Class I glutamine amidotransferase-like superfamily protein
Ghir_D13G004420	0	0.274124	24.0056	0.00117085	up	AT2G14960	Auxin-responsive GH3 family protein
Ghir_D13G006000	4.79764	1.76891	-1.49318	0.00309618	down	AT5G08370	alpha-galactosidase 2
Ghir_D13G006200	1.39472	0.156435	-3.18887	0.023222	down	AT5G08320	CONTAINS InterPro DOMAIN/s: E2F-associated phosphoprotein, C-terminal (InterPro:IPR019370); Has 149 Blast hits to 149 proteins in 78 species: Archae - 0; Bacteria - 0; Metazoa - 79; Fungi - 0; Plants - 35; Viruses - 0; Other Eukaryotes - 35 (source: NCBI BLink).
Ghir_D13G007140	2.72262	6.67937	1.2567	0.0221305	up	AT1G26120	alpha/beta-Hydrolases superfamily protein
Ghir_D13G009070	0.001328	2.36785	9.96289	0.0111517	up	AT2G03890	phosphoinositide 4-kinase gamma 7
Ghir_D13G011080	0.163973	0.002921	-5.24968	0.00377632	down	AT2G32910	DCD (Development and Cell Death) domain protein
Ghir_D13G011130	0.698593	0	-11.0545	0.00129793	down	AT5G27220	Frigida-like protein
Ghir_D13G013030	0.085568	0	-23.7202	4.10075e-06	down	AT3G57560	N-acetyl-l-glutamate kinase
Ghir_D13G013830	0	0.097771	22.6551	1.1499e-07	up	AT5G63890	histidinol dehydrogenase
Ghir_D13G021030	0.058491	3.94042	5.57173	0.0148948	up
Ghir_D13G023550	0.004882	0	-31.2537	1.90763e-09	down	AT3G08500	myb domain protein 83
Ghir_D13G025510	0.000961	1.48882	8.83698	7.13734e-16	up	AT5G58480	O-Glycosyl hydrolases family 17 protein
Ghir_D13G025530	0.00035	2.7746	9.83002	5.68505e-05	up	AT2G30140	UDP-Glycosyltransferase superfamily protein
Ghir_D13G025660	1.23322	8.35899	2.72756	0.000167925	up	AT2G01070	Lung seven transmembrane receptor family protein
Ghir_Scaffold2629G000010	22.8107	0.076108	-8.28905	0.01445	down
Ghir_Scaffold3053G000020	0.28816	0.031048	-3.24377	0.0136611	down	AT5G12200	pyrimidine 2
Ghir_Scaffold3235G000020	587.885	27.8516	-4.43739	0.0217451	down

## Sheet: L1 5DPA vs L2 5DPA
Table S4-3. The differentially expressed genes (DEGs) of each pair-wise comparison of L1 5DPA vs L2 5DPA
geneID	L1_5DPA FPKM	L2_5DPA FPKM	log2FC	FDR	up or down_regulated in L2	Arabidopsis ID	ArabDesc
Ghir_A01G000180	0.0326935	0.188696	2.66977	0.0297718	up	AT4G35190	Putative lysine decarboxylase family protein
Ghir_A01G000390	0.230009	0.565867	1.48159	0.0232978	up	AT4G34660	SH3 domain-containing protein
Ghir_A01G000620	0.0752765	4.67836	6.12216	1.55664e-14	up	AT3G18990	AP2/B3-like transcriptional factor family protein
Ghir_A01G001100	0.0863455	0	-5.84194	0.00170708	down	AT3G18830	polyol/monosaccharide transporter 5
Ghir_A01G001190	1.26823	60.4731	5.79183	1.40742e-15	up	AT1G78300	general regulatory factor 2
Ghir_A01G001280	1.33352	0	-24.9611	1.20546e-29	down	AT5G64120	Peroxidase superfamily protein
Ghir_A01G001760	0	0.17481	5.86154	0.0173892	up	AT2G20875	epidermal patterning factor 1
Ghir_A01G001800	0.104376	0	-5.39705	0.0190921	down	AT4G03600	unknown protein; BEST Arabidopsis thaliana protein match is: unknown protein (TAIR:AT1G03730.1); Has 30201 Blast hits to 17322 proteins in 780 species: Archae - 12; Bacteria - 1396; Metazoa - 17338; Fungi - 3422; Plants - 5037; Viruses - 0; Other Eukaryotes - 2996 (source: NCBI BLink).
Ghir_A01G002530	0.031837	0.301015	3.34444	0.0141254	up	AT3G23130	C2H2 and C2HC zinc fingers superfamily protein
Ghir_A01G002860	0.670073	1.57661	1.46122	0.018949	up	AT4G16060	unknown protein; FUNCTIONS IN: molecular_function unknown; INVOLVED IN: biological_process unknown; LOCATED IN: chloroplast, chloroplast stroma; EXPRESSED IN: 22 plant structures; EXPRESSED DURING: 13 growth stages; Has 42 Blast hits to 42 proteins in 16 species: Archae - 0; Bacteria - 2; Metazoa - 0; Fungi - 0; Plants - 33; Viruses - 0; Other Eukaryotes - 7 (source: NCBI BLink).
Ghir_A01G002880	0	0.160845	7.01871	0.00068141	up	AT3G06778	Chaperone DnaJ-domain superfamily protein
Ghir_A01G003100	0	0.0753237	6.2696	0.0423521	up	AT3G06520	agenet domain-containing protein
Ghir_A01G003520	366.127	951.407	1.58019	1.81616e-05	up	AT1G17200	Uncharacterised protein family (UPF0497)
Ghir_A01G003780	1.36086	0.232234	-2.3358	0.0122878	down
Ghir_A01G003840	0.290658	0	-8.35011	1.75258e-05	down	AT5G18070	phosphoglucosamine mutase-related
Ghir_A01G003990	0	0.199938	22.7117	0.00535158	up	AT4G27190	NB-ARC domain-containing disease resistance protein
Ghir_A01G004010	0	0.178974	22.2289	2.3895e-09	up	AT3G14720	MAP kinase 19
Ghir_A01G004020	0.050348	0	-6.30009	0.0190215	down	AT3G02660	Tyrosyl-tRNA synthetase, class Ib, bacterial/mitochondrial
Ghir_A01G004030	0.276919	0.0256697	-3.19264	0.0406341	down	AT1G17020	senescence-related gene 1
Ghir_A01G004220	0.109812	0.00567833	-4.37107	0.0161903	down	AT3G14840	Leucine-rich repeat transmembrane protein kinase
Ghir_A01G004630	0.687458	0	-8.36243	2.93116e-05	down	AT1G78780	pathogenesis-related family protein
Ghir_A01G004640	2.26559	0.0655497	-4.84011	0.00904797	down	AT1G78780	pathogenesis-related family protein
Ghir_A01G004940	0.016102	0.203567	3.50303	0.0401414	up
Ghir_A01G005200	0.281811	0.017342	-4.19355	4.80458e-06	down	AT5G53950	NAC (No Apical Meristem) domain transcriptional regulator superfamily protein
Ghir_A01G005230	1.06361	0.044133	-4.42114	0.0262929	down	AT3G15220	Protein kinase superfamily protein
Ghir_A01G005240	0.594008	0.040025	-3.55965	0.00225626	down	AT5G53900	Serine/threonine-protein kinase WNK (With No Lysine)-related
Ghir_A01G005360	1.2672	2.58269	1.2406	0.00241616	up	AT5G53850	haloacid dehalogenase-like hydrolase family protein
Ghir_A01G005490	0.277058	0	-6.02281	0.000508834	down	AT1G53010	RING/U-box superfamily protein
Ghir_A01G005550	0	0.0824927	7.9934	0.00151504	up	AT4G12010	Disease resistance protein (TIR-NBS-LRR class) family
Ghir_A01G005670	2.59978	0.317342	-2.8288	1.89679e-05	down	AT5G53750	CBS domain-containing protein
Ghir_A01G005860	2.8279	8.45997	1.79533	0.00402641	up	AT1G52855	unknown protein; BEST Arabidopsis thaliana protein match is: unknown protein (TAIR:AT3G15534.1); Has 35333 Blast hits to 34131 proteins in 2444 species: Archae - 798; Bacteria - 22429; Metazoa - 974; Fungi - 991; Plants - 531; Viruses - 0; Other Eukaryotes - 9610 (source: NCBI BLink).
Ghir_A01G006170	0.586947	0.0374427	-3.6938	0.0325258	down	AT4G27300	S-locus lectin protein kinase family protein
Ghir_A01G006280	0.153923	0	-5.11734	0.0133293	down
Ghir_A01G006360	0.015117	0.219259	4.13021	0.0130287	up	AT5G23960	terpene synthase 21
Ghir_A01G007210	0.02368	0	-4.74934	0.0260574	down	AT4G26930	myb domain protein 97
Ghir_A01G007370	2.58751	5.72948	1.36018	0.0190268	up	AT2G41640	Glycosyltransferase family 61 protein
Ghir_A01G007480	0.312024	0	-7.02454	0.0356202	down	AT4G26780	Co-chaperone GrpE family protein
Ghir_A01G007730	3.2317	0.384544	-2.85168	0.0157826	down	AT5G55530	Calcium-dependent lipid-binding (CaLB domain) family protein
Ghir_A01G007770	1.17466	0	-10.2301	1.94216e-05	down	AT4G26640	WRKY family transcription factor family protein
Ghir_A01G007780	1.8032	0.474468	-1.71638	0.00716354	down	AT1G50600	scarecrow-like 5
Ghir_A01G008160	0.913287	0.27178	-1.52383	0.0266493	down	AT3G13180	NOL1/NOP2/sun family protein / antitermination NusB domain-containing protein
Ghir_A01G008160	0.0021915	0.104401	5.39075	0.0495137	up	AT3G13180	NOL1/NOP2/sun family protein / antitermination NusB domain-containing protein
Ghir_A01G008200	0.509382	0.0604777	-2.80849	3.96185e-12	down	AT1G55850	cellulose synthase like E1
Ghir_A01G008220	0.05196	0	-6.44733	0.00327729	down	AT5G55860	Plant protein of unknown function (DUF827)
Ghir_A01G008370	1.12997	0	-9.5604	0.000575466	down	AT4G26550	Got1/Sft2-like vescicle transport protein family
Ghir_A01G008380	0.141328	0	-5.46427	0.0472659	down	AT4G26550	Got1/Sft2-like vescicle transport protein family
Ghir_A01G008390	1.28642	0.297804	-1.89016	6.94943e-06	down	AT5G56040	Leucine-rich receptor-like protein kinase family protein
Ghir_A01G009210	5.27154	20.9871	2.17409	0.0131007	up	AT3G12710	DNA glycosylase superfamily protein
Ghir_A01G009250	0.848453	1.50663	1.03605	9.61742e-05	up	AT5G42370	Calcineurin-like metallo-phosphoesterase superfamily protein
Ghir_A01G009360	0.043471	0	-4.89365	0.0133819	down	AT1G76420	NAC (No Apical Meristem) domain transcriptional regulator superfamily protein
Ghir_A01G009820	0.789872	0.092127	-2.84571	0.00272139	down	AT4G35070	SBP (S-ribonuclease binding protein) family protein
Ghir_A01G010000	6.92516	0.044507	-7.04322	0.00013664	down	AT1G19850	Transcriptional factor B3 family protein / auxin-responsive factor AUX/IAA-related
Ghir_A01G010380	2.90559	0.969349	-1.37695	0.0045935	down	AT5G42950	GYF domain-containing protein
Ghir_A01G010460	0.117168	0.00805133	-3.68371	0.00208718	down	AT1G75100	J-domain protein required for chloroplast accumulation response 1
Ghir_A01G010560	0	0.150096	8.13904	0.0171215	up	AT4G33300	ADR1-like 1
Ghir_A01G011020	0.220616	0.0227163	-2.92039	0.0021805	down	AT1G34060	Pyridoxal phosphate (PLP)-dependent transferases superfamily protein
Ghir_A01G011580	0.0505555	0	-5.4992	0.0289823	down	AT1G35830	VQ motif-containing protein
Ghir_A01G011610	0.166245	0	-8.0154	0.0214003	down	AT4G24580	Rho GTPase activation protein (RhoGAP) with PH domain
Ghir_A01G011860	2.1649	0.715501	-1.38019	0.0277778	down	AT2G41700	ATP-binding cassette A1
Ghir_A01G012010	4.19739	0.187826	-4.27958	0.0127128	down	AT5G04560	HhH-GPD base excision DNA repair family protein
Ghir_A01G012310	0.305963	0	-7.42613	0.0134119	down
Ghir_A01G012340	0.0525355	0	-4.68969	0.0489686	down	AT3G57670	C2H2-type zinc finger family protein
Ghir_A01G012620	0.0357985	0	-4.52067	0.0246624	down	AT2G41940	zinc finger protein 8
Ghir_A01G013190	0.312663	0	-8.662	4.16643e-05	down	AT1G70300	K+ uptake permease 6
Ghir_A01G013230	4.38756	0.659304	-2.54275	0.0276851	down	AT5G51810	gibberellin 20 oxidase 2
Ghir_A01G013510	0.271045	0.0174467	-3.4925	0.00158825	down	AT5G03530	RAB GTPase homolog C2A
Ghir_A01G013590	3.58777	0.974774	-1.6573	7.91303e-05	down	AT2G01940	C2H2-like zinc finger protein
Ghir_A01G013600	0.514406	0.089107	-2.33599	0.00289953	down	AT2G01950	BRI1-like 2
Ghir_A01G013690	0.155342	0	-7.97907	0.0440439	down	AT2G02040	peptide transporter 2
Ghir_A01G013730	0.228369	0.023232	-2.89089	0.00208067	down	AT1G14600	Homeodomain-like superfamily protein
Ghir_A01G013860	1.6819	3.01371	1.04082	7.94443e-05	up	AT3G18010	WUSCHEL related homeobox 1
Ghir_A01G013920	0.73455	0.104887	-2.50953	0.00656006	down	AT2G01430	homeobox-leucine zipper protein 17
Ghir_A01G014060	0.606738	0	-7.44206	0.000276344	down	AT1G14870	PLANT CADMIUM RESISTANCE 2
Ghir_A01G014110	1.56267	0.264055	-2.35315	0.0256667	down	AT2G01630	O-Glycosyl hydrolases family 17 protein
Ghir_A01G014310	0.141271	0.000829	-5.43083	0.034954	down	AT1G25145	UDP-3-O-acyl N-acetylglycosamine deacetylase family protein
Ghir_A01G014410	1.0679	0.342522	-1.40765	1.96882e-05	down	AT3G19850	Phototropic-responsive NPH3 family protein
Ghir_A01G014420	0.0648895	4.29461	6.21916	4.01336e-05	up	AT3G19895	RING/U-box superfamily protein
Ghir_A01G014640	4.38289	1.35943	-1.45906	0.0462584	down	AT1G71010	FORMS APLOid AND BINUCLEATE CELLS 1C
Ghir_A01G014700	0.51354	0	-8.90287	1.23806e-05	down	AT1G71070	Core-2/I-branching beta-1,6-N-acetylglucosaminyltransferase family protein
Ghir_A01G014740	0.206958	0.021956	-3.02806	0.0367745	down	AT2G01275	RING/FYVE/PHD zinc finger superfamily protein
Ghir_A01G014750	1.74179	0.389446	-1.94275	0.0191676	down	AT1G27980	dihydrosphingosine phosphate lyase
Ghir_A01G014860	7.18855	26.5408	2.07904	2.47955e-06	up	AT3G01860	unknown protein; FUNCTIONS IN: molecular_function unknown; INVOLVED IN: response to cadmium ion; LOCATED IN: chloroplast; EXPRESSED IN: 24 plant structures; EXPRESSED DURING: 13 growth stages; BEST Arabidopsis thaliana protein match is: unknown protein (TAIR:AT3G27210.1); Has 66 Blast hits to 66 proteins in 13 species: Archae - 0; Bacteria - 0; Metazoa - 5; Fungi - 0; Plants - 61; Viruses - 0; Ot…
Ghir_A01G014920	0	0.120106	7.24336	0.0243943	up	AT5G63380	AMP-dependent synthetase and ligase family protein
Ghir_A01G014930	0.196657	0.537068	1.58918	0.000896927	up
Ghir_A01G015060	0.051293	0	-5.02803	0.0118388	down	AT2G23890	HAD-superfamily hydrolase, subfamily IG, 5'-nucleotidase
Ghir_A01G015130	0.791167	0.198702	-1.7764	0.0262155	down	AT1G13130	Cellulase (glycosyl hydrolase family 5) protein
Ghir_A01G015280	0.105698	0.00654167	-3.44088	0.0396092	down	AT1G10750	Protein of Unknown Function (DUF239)
Ghir_A01G015470	2.11958	0.625263	-1.54851	0.00201278	down	AT1G60490	vacuolar protein sorting 34
Ghir_A01G015570	5.46296	2.03706	-1.2132	0.0455009	down	AT1G67340	HCP-like superfamily protein with MYND-type zinc finger
Ghir_A01G015580	0.815727	3.36426	2.20673	0.00424383	up	AT1G67360	Rubber elongation factor protein (REF)
Ghir_A01G015600	0.29131	0.0332293	-2.79033	0.0101358	down	AT5G11860	SCP1-like small phosphatase 5
Ghir_A01G015630	8.43868	1.30333	-2.51925	0.0188175	down	AT2G21190	ER lumen protein retaining receptor family protein
Ghir_A01G015710	106.794	271.523	1.54358	0.00261974	up	AT2G21140	proline-rich protein 2
Ghir_A01G015850	0.028144	2.21161	6.40991	0.0250635	up	AT2G21060	glycine-rich protein 2B
Ghir_A01G015910	0.493246	0.10043	-2.00045	0.0241026	down	AT4G38660	Pathogenesis-related thaumatin superfamily protein
Ghir_A01G015930	2.43388	0.116653	-4.12512	0.00029323	down	AT4G34950	Major facilitator superfamily protein
Ghir_A01G016280	0.616503	1.17121	1.12969	0.0137949	up	AT2G20920	Protein of unknown function (DUF3353)
Ghir_A01G016550	0.128136	0	-6.66247	0.00962672	down	AT3G12500	basic chitinase
Ghir_A01G016650	1.10203	0	-9.78377	1.13106e-05	down	AT2G17120	lysm domain GPI-anchored protein 2 precursor
Ghir_A01G016920	0.156755	0	-7.3558	0.0030609	down	AT1G68140	Protein of unknown function (DUF1644)
Ghir_A01G017230	0.130269	0	-7.41437	0.0248187	down	AT1G09970	Leucine-rich receptor-like protein kinase family protein
Ghir_A01G018030	0.644974	0.121509	-2.16679	0.0495021	down	AT1G77920	bZIP transcription factor family protein
Ghir_A01G018180	0	0.0474877	5.82694	0.0159653	up	AT1G76450	Photosystem II reaction center PsbP family protein
Ghir_A01G018200	0.459917	0.0517187	-2.93803	0.00599291	down	AT1G77600	ARM repeat superfamily protein
Ghir_A01G018280	3.13257	0.760418	-1.85486	0.00834169	down	AT1G21750	PDI-like 1-1
Ghir_A01G018610	3.45521	1.30835	-1.19125	0.0210496	down	AT3G56940	dicarboxylate diiron protein, putative (Crd1)
Ghir_A01G018810	0.115638	0	-7.11356	0.0169155	down	AT3G57360	unknown protein; BEST Arabidopsis thaliana protein match is: unknown protein (TAIR:AT3G02370.2); Has 122 Blast hits to 122 proteins in 54 species: Archae - 0; Bacteria - 0; Metazoa - 74; Fungi - 4; Plants - 41; Viruses - 0; Other Eukaryotes - 3 (source: NCBI BLink).
Ghir_A01G019320	0.141809	0.337925	1.41622	0.0476283	up	AT3G11690	unknown protein; FUNCTIONS IN: molecular_function unknown; INVOLVED IN: biological_process unknown; LOCATED IN: chloroplast; EXPRESSED IN: 24 plant structures; EXPRESSED DURING: 15 growth stages; BEST Arabidopsis thaliana protein match is: unknown protein (TAIR:AT5G06380.1); Has 84 Blast hits to 84 proteins in 12 species: Archae - 0; Bacteria - 0; Metazoa - 0; Fungi - 0; Plants - 84; Viruses - 0;…
Ghir_A01G019470	1.96966	0.296152	-2.4943	0.0267751	down	AT2G35940	BEL1-like homeodomain 1
Ghir_A01G019650	1.72935	3.9371	1.38082	0.0473001	up	AT3G11600	unknown protein; FUNCTIONS IN: molecular_function unknown; INVOLVED IN: response to karrikin; EXPRESSED IN: 21 plant structures; EXPRESSED DURING: 12 growth stages; BEST Arabidopsis thaliana protein match is: unknown protein (TAIR:AT5G06270.1); Has 171 Blast hits to 171 proteins in 15 species: Archae - 0; Bacteria - 0; Metazoa - 0; Fungi - 0; Plants - 171; Viruses - 0; Other Eukaryotes - 0 (sourc…
Ghir_A01G019740	0.839174	0.0292333	-4.47691	0.000200191	down	AT2G24280	alpha/beta-Hydrolases superfamily protein
Ghir_A01G019810	0.378043	0.060314	-2.45767	0.0248654	down	AT3G52600	cell wall invertase 2
Ghir_A01G019990	0.0874755	0.007749	-2.93946	0.00464944	down	AT2G36270	Basic-leucine zipper (bZIP) transcription factor family protein
Ghir_A01G020330	1.24032	0.536921	-1.01844	0.0169996	down	AT3G53030	ser/arg-rich protein kinase 4
Ghir_A01G020340	0.0471985	0	-4.5209	0.0220153	down	AT5G03795	Exostosin family protein
Ghir_A01G020350	0.159471	0	-7.12032	0.000171963	down	AT5G03795	Exostosin family protein
Ghir_A01G020580	1.97532	9.90446	2.49936	0.00138972	up	AT2G36930	zinc finger (C2H2 type) family protein
Ghir_A01G020660	3.16799	0	-25.6523	1.0908e-30	down	AT2G37025	TRF-like 8
Ghir_A01G020830	15.5185	29.9333	1.13948	0.0210993	up	AT5G03120	unknown protein; FUNCTIONS IN: molecular_function unknown; INVOLVED IN: biological_process unknown; LOCATED IN: endomembrane system; EXPRESSED IN: 21 plant structures; EXPRESSED DURING: 13 growth stages; Has 14 Blast hits to 14 proteins in 4 species: Archae - 0; Bacteria - 0; Metazoa - 0; Fungi - 0; Plants - 14; Viruses - 0; Other Eukaryotes - 0 (source: NCBI BLink).
Ghir_A01G021360	0.120752	0	-6.18629	0.00220486	down	AT4G13710	Pectin lyase-like superfamily protein
Ghir_A01G021430	0.387589	0.0174597	-3.90971	0.0479553	down	AT2G37860	Protein of unknown function (DUF3411)
Ghir_A01G021560	2.51816	0.365466	-2.56189	6.52961e-07	down	AT2G28930	protein kinase 1B
Ghir_A01G021570	0.444003	0	-25.7453	6.97737e-18	down	AT5G02310	proteolysis 6
Ghir_A01G021580	324.208	1.6646	-7.31886	6.40475e-05	down	AT3G09390	metallothionein 2A
Ghir_A01G021750	1.77102	0	-9.64061	5.55241e-07	down	AT3G54040	PAR1 protein
Ghir_A01G022010	2.03523	0.536917	-1.707	0.00046603	down	AT2G38120	Transmembrane amino acid transporter family protein
Ghir_A01G022100	6.06339	1.23566	-2.09769	6.93734e-05	down	AT5G04060	S-adenosyl-L-methionine-dependent methyltransferases superfamily protein
Ghir_A01G022190	0.0240245	0.172338	3.06614	0.0374236	up	AT3G08940	light harvesting complex photosystem II
Ghir_A01G022270	0.649148	0.196306	-1.52469	0.00144277	down	AT2G38290	ammonium transporter 2
Ghir_A01G022350	2.13119	0.715694	-1.35938	0.0258034	down	AT2G38310	PYR1-like 4
Ghir_A01G022430	1.53683	0.353224	-1.89921	0.0268518	down	AT5G01720	RNI-like superfamily protein
Ghir_A01G022710	0.692547	1.69658	1.48008	0.0254718	up	AT5G42290	transcription activator-related
Ghir_A01G022830	3.58918	1.50917	-1.0474	0.00038916	down
Ghir_A01G022840	0.717397	0.0234843	-4.6957	0.00159434	down	AT1G53210	sodium/calcium exchanger family protein / calcium-binding EF hand family protein
Ghir_A01G023010	0.56086	0.0774663	-2.61264	0.00526565	down	AT5G06700	Plant protein of unknown function (DUF828)
Ghir_A01G023100	0.040151	0	-5.08184	0.0183188	down	AT1G30950	F-box family protein
Ghir_A02G000100	0.114297	2.56196	4.6173	0.030081	up	AT5G01015	unknown protein; FUNCTIONS IN: molecular_function unknown; INVOLVED IN: biological_process unknown; LOCATED IN: endomembrane system; EXPRESSED IN: 23 plant structures; EXPRESSED DURING: 13 growth stages; BEST Arabidopsis thaliana protein match is: unknown protein (TAIR:AT1G65295.1); Has 30201 Blast hits to 17322 proteins in 780 species: Archae - 12; Bacteria - 1396; Metazoa - 17338; Fungi - 3422;…
Ghir_A02G000160	0	1.47164	30.8668	4.35733e-05	up	AT2G37230	Tetratricopeptide repeat (TPR)-like superfamily protein
Ghir_A02G000290	0.194248	0.0393387	-2.12111	0.00263397	down	AT5G01920	Protein kinase superfamily protein
Ghir_A02G000310	0.299007	0.0365993	-2.53714	0.0473001	down	AT5G01910	unknown protein; Has 66 Blast hits to 66 proteins in 27 species: Archae - 0; Bacteria - 2; Metazoa - 18; Fungi - 7; Plants - 29; Viruses - 0; Other Eukaryotes - 10 (source: NCBI BLink).
Ghir_A02G000380	0.224247	0.0412243	-2.27981	0.0162693	down	AT5G64320	Pentatricopeptide repeat (PPR) superfamily protein
Ghir_A02G000410	0.374501	0	-7.15413	2.52252e-06	down
Ghir_A02G000570	1.64935	0.104729	-3.66949	0.0185965	down	AT3G51730	saposin B domain-containing protein
Ghir_A02G000670	1.98446	4.40349	1.34168	0.00123729	up	AT3G03080	Zinc-binding dehydrogenase family protein
Ghir_A02G000860	0.266653	0	-8.9444	1.14354e-05	down	AT3G14470	NB-ARC domain-containing disease resistance protein
Ghir_A02G001020	0.051829	0	-5.76415	0.0363972	down
Ghir_A02G001110	1.31884	6.15562	2.44847	6.30987e-06	up	AT3G59690	IQ-domain 13
Ghir_A02G001450	0	0.166338	29.2959	6.06994e-09	up	AT3G59470	Far-red impaired responsive (FAR1) family protein
Ghir_A02G001470	0.834189	0	-8.81897	0.000131257	down	AT2G43280	Far-red impaired responsive (FAR1) family protein
Ghir_A02G001480	0	0.481026	8.74173	0.00196864	up	AT1G05990	EF hand calcium-binding protein family
Ghir_A02G001830	1.73284	0.192534	-2.93345	0.0168427	down	AT1G30840	purine permease 4
Ghir_A02G002180	0.939195	1.92103	1.22909	0.0011869	up	AT4G29660	embryo defective 2752
Ghir_A02G002380	0.319783	0.0930797	-1.50913	0.00657552	down	AT1G04840	Tetratricopeptide repeat (TPR)-like superfamily protein
Ghir_A02G002430	0.278468	0	-6.9217	0.00316458	down	AT4G13600	Carbohydrate-binding X8 domain superfamily protein
Ghir_A02G002710	2.54495	0.73729	-1.57532	0.00724378	down	AT3G06190	BTB-POZ and MATH domain 2
Ghir_A02G002720	16.6465	4.29768	-1.74013	0.0331473	down	AT5G35630	glutamine synthetase 2
Ghir_A02G003390	3.03405	21.7225	3.01707	0.016386	up	AT4G10250	HSP20-like chaperones superfamily protein
Ghir_A02G003630	1.05954	0.172	-2.37426	0.0497181	down	AT3G63410	S-adenosyl-L-methionine-dependent methyltransferases superfamily protein
Ghir_A02G003750	0.305864	0	-7.81402	2.01396e-06	down	AT4G29090	Ribonuclease H-like superfamily protein
Ghir_A02G003890	4.20747	10.4399	1.51135	0.0036392	up	AT4G14440	3-hydroxyacyl-CoA dehydratase 1
Ghir_A02G003900	11.3016	0.23837	-5.23498	0.00153785	down	AT4G14420	HR-like lesion-inducing protein-related
Ghir_A02G004000	7.13241	0.506239	-3.64782	1.09443e-05	down	AT3G22142	Bifunctional inhibitor/lipid-transfer protein/seed storage 2S albumin superfamily protein
Ghir_A02G004010	0.677914	0.236183	-1.28023	0.0325258	down	AT5G43380	type one serine/threonine protein phosphatase 6
Ghir_A02G004080	0.0027895	1.25379	8.54079	0.0312478	up	AT4G14350	AGC (cAMP-dependent, cGMP-dependent and protein kinase C) kinase family protein
Ghir_A02G004130	3.32057	1.13929	-1.33767	0.00614173	down	AT4G14330	P-loop containing nucleoside triphosphate hydrolases superfamily protein
Ghir_A02G004290	2.11127	4.28906	1.22884	0.0167248	up	AT2G33410	RNA-binding (RRM/RBD/RNP motifs) family protein
Ghir_A02G004330	1.45596	0.351943	-1.8433	0.036484	down	AT2G33360	Protein of unknown function (DUF3527)
Ghir_A02G004420	0.097382	0	-5.36598	0.0381573	down	AT1G04540	Calcium-dependent lipid-binding (CaLB domain) family protein
Ghir_A02G004590	1.03205	0.329061	-1.41723	0.000467368	down	AT3G06270	Protein phosphatase 2C family protein
Ghir_A02G004650	0.154847	0	-7.48588	6.33271e-06	down	AT5G18860	inosine-uridine preferring nucleoside hydrolase family protein
Ghir_A02G004720	1.85609	0.344509	-2.19682	0.0146371	down	AT5G18700	Protein kinase family protein with ARM repeat domain
Ghir_A02G004890	1.93227	0	-24.1883	0.000127917	down	AT5G07900	Mitochondrial transcription termination factor family protein
Ghir_A02G004960	0.142409	0	-5.67183	0.0053242	down	AT2G47810	nuclear factor Y, subunit B5
Ghir_A02G005570	1.24319	0.386569	-1.44811	0.0495137	down	AT3G06620	PAS domain-containing protein tyrosine kinase family protein
Ghir_A02G005640	0.063639	0	-5.93351	0.0358982	down	AT5G49520	WRKY DNA-binding protein 48
Ghir_A02G005840	1.39866	0	-10.6709	2.44373e-14	down	AT2G47160	HCO3- transporter family
Ghir_A02G005860	0.023141	1.94539	6.43766	1.01087e-08	up	AT3G17310	S-adenosyl-L-methionine-dependent methyltransferases superfamily protein
Ghir_A02G005970	14.1245	2.99377	-2.06405	0.000300563	down	AT3G17390	S-adenosylmethionine synthetase family protein
Ghir_A02G006150	0	1.19067	28.6271	0.000197329	up	AT3G21760	UDP-Glycosyltransferase superfamily protein
Ghir_A02G006160	0.09276	0	-5.8417	0.0117143	down	AT3G21760	UDP-Glycosyltransferase superfamily protein
Ghir_A02G006180	7.7432	3.0957	-1.10809	0.0297909	down	AT1G48320	Thioesterase superfamily protein
Ghir_A02G006240	0	0.198621	7.01816	0.0169062	up	AT4G09580	SNARE associated Golgi protein family
Ghir_A02G006340	0.045647	0	-5.36099	0.00477405	down	AT1G34340	alpha/beta-Hydrolases superfamily protein
Ghir_A02G006480	2.26823	0	-10.9467	0.000125085	down	AT5G09360	laccase 14
Ghir_A02G006500	0.165677	0	-7.46666	5.06114e-05	down	AT1G71720	Nucleic acid-binding proteins superfamily
Ghir_A02G006610	0	0.038428	6.08276	0.00270239	up	AT5G61890	Integrase-type DNA-binding superfamily protein
Ghir_A02G006640	0.864857	4.14443	2.42903	0.0296153	up	AT1G43170	ribosomal protein 1
Ghir_A02G006810	0.029356	0	-4.92036	0.0220807	down	AT5G42120	Concanavalin A-like lectin protein kinase family protein
Ghir_A02G006850	0.914585	0.0713017	-3.43925	0.00118909	down	AT5G48940	Leucine-rich repeat transmembrane protein kinase family protein
Ghir_A02G006970	5.33207	0.943882	-2.28817	0.0064747	down	AT1G77110	Auxin efflux carrier family protein
Ghir_A02G007550	0.108243	0	-6.74691	0.00148634	down	AT1G11050	Protein kinase superfamily protein
Ghir_A02G008110	0.278952	0	-8.29148	0.000146612	down	AT1G34630	BEST Arabidopsis thaliana protein match is: Mitochondrial import inner membrane translocase subunit Tim17/Tim22/Tim23 family protein (TAIR:AT5G51150.1); Has 323 Blast hits to 315 proteins in 124 species: Archae - 0; Bacteria - 0; Metazoa - 95; Fungi - 110; Plants - 73; Viruses - 0; Other Eukaryotes - 45 (source: NCBI BLink).
Ghir_A02G008370	2.55945	0.575407	-1.92817	0.00124359	down	AT4G24560	ubiquitin-specific protease 16
Ghir_A02G008550	0	0.139738	7.27627	0.00264191	up	AT4G37790	Homeobox-leucine zipper protein family
Ghir_A02G008590	0.864622	0.292357	-1.33846	0.0448938	down	AT4G07960	Cellulose-synthase-like C12
Ghir_A02G008610	0.233592	0	-7.93207	9.44643e-07	down	AT1G59540	P-loop containing nucleoside triphosphate hydrolases superfamily protein
Ghir_A02G008730	2.01831	5.62875	1.69224	0.000125085	up	AT1G49890	Family of unknown function (DUF566)
Ghir_A02G008880	6.83487	0.404145	-3.91442	0.0131481	down	AT5G67360	Subtilase family protein
Ghir_A02G009240	3.94418	7.31918	1.09291	0.00134209	up	AT3G54200	Late embryogenesis abundant (LEA) hydroxyproline-rich glycoprotein family
Ghir_A02G009300	0.51334	0	-8.27694	0.00303012	down	AT2G30710	Ypt/Rab-GAP domain of gyp1p superfamily protein
Ghir_A02G009660	0.0733675	0	-5.92567	0.00754511	down	AT4G25810	xyloglucan endotransglycosylase 6
Ghir_A02G010010	0.714831	0.129825	-2.2859	0.0498032	down	AT1G19860	Zinc finger C-x8-C-x5-C-x3-H type family protein
Ghir_A02G010110	0.25656	1.05787	2.22765	0.0070107	up	AT1G76890	Duplicated homeodomain-like superfamily protein
Ghir_A02G010310	0.133532	0	-6.38678	0.00898845	down	AT4G31240	protein kinase C-like zinc finger protein
Ghir_A02G010420	1.28324	0.521566	-1.08356	0.0135761	down	AT1G64610	Transducin/WD40 repeat-like superfamily protein
Ghir_A02G010520	1.30175	0	-10.3572	0.00709433	down	AT5G41960	unknown protein; FUNCTIONS IN: molecular_function unknown; INVOLVED IN: biological_process unknown; LOCATED IN: chloroplast; EXPRESSED IN: 22 plant structures; EXPRESSED DURING: 13 growth stages; Has 1807 Blast hits to 1807 proteins in 277 species: Archae - 0; Bacteria - 0; Metazoa - 736; Fungi - 347; Plants - 385; Viruses - 0; Other Eukaryotes - 339 (source: NCBI BLink).
Ghir_A02G010940	0.335145	0.112132	-1.42229	0.00963756	down	AT5G41800	Transmembrane amino acid transporter family protein
Ghir_A02G010970	0.360577	0	-8.77745	0.0256519	down	AT5G41790	COP1-interactive protein 1
Ghir_A02G011000	0.309055	0.0681997	-1.96216	0.0021852	down	AT4G23750	cytokinin response factor 2
Ghir_A02G011090	0.216007	0	-8.14389	0.000975845	down	AT5G41610	cation/H+ exchanger 18
Ghir_A02G011240	0.63322	0.058224	-3.21818	0.00434008	down	AT1G64080	unknown protein; FUNCTIONS IN: molecular_function unknown; INVOLVED IN: biological_process unknown; LOCATED IN: plasma membrane; BEST Arabidopsis thaliana protein match is: unknown protein (TAIR:AT5G52870.1); Has 1546 Blast hits to 738 proteins in 176 species: Archae - 0; Bacteria - 143; Metazoa - 278; Fungi - 131; Plants - 95; Viruses - 4; Other Eukaryotes - 895 (source: NCBI BLink).
Ghir_A02G011270	0.621451	0.037845	-3.77629	0.000126671	down	AT1G64060	respiratory burst oxidase protein F
Ghir_A02G011330	0.402388	1.53455	2.09734	0.00645385	up	AT5G41560	FUNCTIONS IN: molecular_function unknown; INVOLVED IN: biological_process unknown; LOCATED IN: chloroplast; EXPRESSED IN: 24 plant structures; EXPRESSED DURING: 15 growth stages; CONTAINS InterPro DOMAIN/s: Ubiquitin ligase, Det1/DDB1-complexing (InterPro:IPR018276); Has 1807 Blast hits to 1807 proteins in 277 species: Archae - 0; Bacteria - 0; Metazoa - 736; Fungi - 347; Plants - 385; Viruses - …
Ghir_A02G011560	2.56772	0.031617	-6.11432	0.0010878	down	AT3G57660	nuclear RNA polymerase A1
Ghir_A02G011760	2.28116	0.942922	-1.0465	5.16059e-07	down	AT5G25460	Protein of unknown function, DUF642
Ghir_A02G011830	0.060672	0	-7.00878	0.00105002	down	AT1G15520	pleiotropic drug resistance 12
Ghir_A02G011940	0.0740875	0	-20.4767	0.000128186	down	AT1G21640	NAD kinase 2
Ghir_A02G012000	2.02037	0.498291	-1.80063	0.00876327	down	AT1G77280	Protein kinase protein with adenine nucleotide alpha hydrolases-like domain
Ghir_A02G012100	1.06792	3.47311	1.88377	0.00794365	up	AT1G21390	embryo defective 2170
Ghir_A02G012130	0.0224915	3.51903	7.18712	0.000659598	up	AT1G10020	Protein of unknown function (DUF1005)
Ghir_A02G012190	0.406063	0	-8.05453	0.000377577	down	AT1G31130	unknown protein; FUNCTIONS IN: molecular_function unknown; INVOLVED IN: biological_process unknown; LOCATED IN: cellular_component unknown; EXPRESSED IN: 23 plant structures; EXPRESSED DURING: 13 growth stages; BEST Arabidopsis thaliana protein match is: unknown protein (TAIR:AT4G19950.1); Has 246 Blast hits to 244 proteins in 29 species: Archae - 2; Bacteria - 16; Metazoa - 0; Fungi - 0; Plants …
Ghir_A02G012250	0	0.038705	6.43452	0.0296774	up	AT1G78780	pathogenesis-related family protein
Ghir_A02G012280	0.152913	0	-7.49716	0.000595491	down	AT2G41640	Glycosyltransferase family 61 protein
Ghir_A02G012770	2.48981	0	-25.5734	1.83701e-14	down	AT4G26500	chloroplast sulfur E
Ghir_A02G012790	1.40023	0.186761	-2.67766	0.00153085	down	AT1G64940	cytochrome P450, family 87, subfamily A, polypeptide 6
Ghir_A02G013260	2.20216	4.60351	1.25046	0.00063932	up	AT3G16310	mitotic phosphoprotein N' end (MPPN) family protein
Ghir_A02G013370	0	0.413517	23.3467	6.22685e-07	up	AT1G52190	Major facilitator superfamily protein
Ghir_A02G013580	0.0921595	0.000208667	-6.00469	0.0098653	down	AT1G79990	structural molecules
Ghir_A02G013630	1.32573	0	-10.9607	9.50652e-08	down	AT1G80410	tetratricopeptide repeat (TPR)-containing protein
Ghir_A02G013770	5.23839	1.67696	-1.43074	0.00291243	down	AT3G15550	unknown protein; Has 25732 Blast hits to 16979 proteins in 961 species: Archae - 144; Bacteria - 1801; Metazoa - 12681; Fungi - 1868; Plants - 912; Viruses - 94; Other Eukaryotes - 8232 (source: NCBI BLink).
Ghir_A02G013970	69.8792	207.549	1.74981	0.0160899	up	AT4G25980	Peroxidase superfamily protein
Ghir_A02G013990	0.433923	0.0172147	-4.17679	2.27066e-05	down	AT3G13960	growth-regulating factor 5
Ghir_A02G014130	0	0.143478	7.5182	0.0083567	up	AT3G11290	unknown protein; BEST Arabidopsis thaliana protein match is: unknown protein (TAIR:AT3G11310.1); Has 720 Blast hits to 435 proteins in 28 species: Archae - 0; Bacteria - 2; Metazoa - 0; Fungi - 32; Plants - 682; Viruses - 0; Other Eukaryotes - 4 (source: NCBI BLink).
Ghir_A02G014230	0.035464	0	-5.14842	0.0187481	down	AT5G19440	NAD(P)-binding Rossmann-fold superfamily protein
Ghir_A02G014290	2.03211	0.618455	-1.51024	0.0156985	down	AT4G08980	F-BOX WITH WD-40 2
Ghir_A02G014520	0	0.0574077	5.50244	0.0390742	up	AT4G38100	unknown protein; LOCATED IN: chloroplast thylakoid membrane; EXPRESSED IN: 23 plant structures; EXPRESSED DURING: 13 growth stages; BEST Arabidopsis thaliana protein match is: unknown protein (TAIR:AT4G01150.1); Has 30201 Blast hits to 17322 proteins in 780 species: Archae - 12; Bacteria - 1396; Metazoa - 17338; Fungi - 3422; Plants - 5037; Viruses - 0; Other Eukaryotes - 2996 (source: NCBI BLink…
Ghir_A02G014620	3.84794	1.1056	-1.5995	0.000125085	down
Ghir_A02G014820	22.6974	43.5791	1.13737	0.002608	up	AT1G15100	RING-H2 finger A2A
Ghir_A02G015240	0	1.45762	10.6725	1.47896e-05	up	AT3G57750	Protein kinase superfamily protein
Ghir_A02G015410	0.766025	0.25575	-1.36858	0.0110906	down	AT3G18110	Pentatricopeptide repeat (PPR) superfamily protein
Ghir_A02G015470	7.13958	0	-11.692	0.000285421	down	AT1G05205	unknown protein; Has 44 Blast hits to 44 proteins in 16 species: Archae - 0; Bacteria - 0; Metazoa - 0; Fungi - 0; Plants - 44; Viruses - 0; Other Eukaryotes - 0 (source: NCBI BLink).
Ghir_A02G015820	1.51127	0.03488	-5.05936	0.000110578	down	AT4G39910	ubiquitin-specific protease 3
Ghir_A02G016150	1.05075	0.004634	-7.38456	0.00381384	down	AT2G22660	Protein of unknown function (duplicated DUF1399)
Ghir_A02G016290	8.67562	1.92189	-1.96634	0.000809002	down	AT5G65700	Leucine-rich receptor-like protein kinase family protein
Ghir_A02G016300	18.4986	5.9981	-1.41085	0.0178487	down	AT5G65700	Leucine-rich receptor-like protein kinase family protein
Ghir_A02G016320	0.472806	0.0807027	-2.32593	0.0165133	down	AT5G65710	HAESA-like 2
Ghir_A02G016570	0.0697135	0	-4.39437	0.0397019	down	AT4G37700	unknown protein; Has 64 Blast hits to 64 proteins in 11 species: Archae - 0; Bacteria - 0; Metazoa - 0; Fungi - 0; Plants - 64; Viruses - 0; Other Eukaryotes - 0 (source: NCBI BLink).
Ghir_A02G016680	0	0.470531	23.3396	1.2195e-05	up	AT5G67540	Arabinanase/levansucrase/invertase
Ghir_A02G016720	0	15.3906	35.5629	1.1052e-06	up	AT3G49910	Translation protein SH3-like family protein
Ghir_A02G016860	1.00567	0.39912	-1.13779	0.0257849	down	AT5G67350	unknown protein; Has 1807 Blast hits to 1807 proteins in 277 species: Archae - 0; Bacteria - 0; Metazoa - 736; Fungi - 347; Plants - 385; Viruses - 0; Other Eukaryotes - 339 (source: NCBI BLink).
Ghir_A02G016910	0.11755	0	-7.47901	0.0218107	down	AT2G23140	RING/U-box superfamily protein with ARM repeat domain
Ghir_A02G016990	0.540851	0.194932	-1.23165	0.0473881	down	AT2G23200	Protein kinase superfamily protein
Ghir_A02G017030	0.791284	3.40588	2.2943	2.52099e-05	up	AT5G67250	SKP1/ASK1-interacting protein 2
Ghir_A02G017270	0.167585	0	-5.54847	0.00675783	down
Ghir_A02G017560	0.21807	0.0306643	-2.31883	0.000263678	down	AT4G31650	Transcriptional factor B3 family protein
Ghir_A02G017610	0.735971	0.218017	-1.5584	0.00906494	down	AT3G18990	AP2/B3-like transcriptional factor family protein
Ghir_A02G017620	0.485175	0.133551	-1.56851	0.0265218	down	AT2G23470	Protein of unknown function, DUF647
Ghir_A02G017720	0.501041	0	-8.77731	0.000147328	down	AT5G66600	Protein of unknown function, DUF547
Ghir_A02G018550	1.49733	0.296243	-2.12933	0.0436983	down	AT4G36180	Leucine-rich receptor-like protein kinase family protein
Ghir_A02G018580	0.161224	0.0203157	-2.42448	0.0297791	down	AT2G18060	vascular related NAC-domain protein 1
Ghir_A02G018660	0.77552	0.0362613	-4.00551	1.95973e-08	down	AT5G66230	Chalcone-flavanone isomerase family protein
Ghir_A02G018690	0.29538	0	-7.6864	0.000381096	down	AT1G75800	Pathogenesis-related thaumatin superfamily protein
Ghir_A02G018810	3.92485	1.02259	-1.72568	0.0209413	down	AT3G51290	Protein of unknown function (DUF630) ;Protein of unknown function (DUF632)
Ghir_A02G018940	2.32868	0.802442	-1.32013	0.0486806	down	AT2G17760	Eukaryotic aspartyl protease family protein
Ghir_A02G018960	12.9934	3.65628	-1.62302	0.00546256	down	AT2G27090	Protein of unknown function (DUF630 and DUF632)
Ghir_A02G019030	0.345636	1.31651	2.13169	0.00426289	up	AT1G76070	unknown protein; FUNCTIONS IN: molecular_function unknown; INVOLVED IN: biological_process unknown; LOCATED IN: plasma membrane; EXPRESSED IN: 8 plant structures; EXPRESSED DURING: LP.04 four leaves visible, 4 anthesis, petal differentiation and expansion stage; BEST Arabidopsis thaliana protein match is: unknown protein (TAIR:AT1G20310.1); Has 66 Blast hits to 66 proteins in 15 species: Archae -…
Ghir_A02G019250	0.9353	0.0525717	-3.91169	0.000535193	down	AT2G17650	AMP-dependent synthetase and ligase family protein
Ghir_A02G019300	0.646591	0.118013	-2.17013	0.0148015	down	AT4G35090	catalase 2
Ghir_A02G019370	0	0.541213	24.5166	2.17066e-07	up	AT2G17550	unknown protein; Has 264 Blast hits to 258 proteins in 65 species: Archae - 5; Bacteria - 5; Metazoa - 66; Fungi - 16; Plants - 107; Viruses - 0; Other Eukaryotes - 65 (source: NCBI BLink).
Ghir_A02G019530	0.252391	0	-7.84371	4.06712e-06	down	AT2G17410	ARid/BRIGHT DNA-binding domain-containing protein
Ghir_A02G019680	0.442082	2.64942	2.78901	3.23662e-13	up	AT1G26800	RING/U-box superfamily protein
Ghir_A03G000110	0.61817	1.61022	1.57804	0.0246966	up	AT4G19390	Uncharacterised protein family (UPF0114)
Ghir_A03G000200	0	0.042956	20.4954	3.559e-05	up	AT5G45500	RNI-like superfamily protein
Ghir_A03G000550	0.428529	2.40656	2.71585	0.0326481	up
Ghir_A03G000600	3.85789	0.971393	-1.81469	0.00485001	down	AT4G17880	Basic helix-loop-helix (bHLH) DNA-binding family protein
Ghir_A03G000760	0	0.216973	7.48133	0.0264615	up	AT2G35370	glycine decarboxylase complex H
Ghir_A03G000790	0.0535635	0	-5.5804	0.000423341	down	AT1G32450	nitrate transporter 1.5
Ghir_A03G001160	1.11732	2.32109	1.23508	0.00121835	up	AT4G16845	VEFS-Box of polycomb protein
Ghir_A03G001250	0	0.233207	8.42951	0.000205491	up	AT4G17430	O-fucosyltransferase family protein
Ghir_A03G001300	0.185095	0	-7.00049	0.000243557	down
Ghir_A03G001330	0	0.529254	23.6411	0.000971937	up	AT4G17350	Plant protein of unknown function (DUF828) with plant pleckstrin homology-like region
Ghir_A03G001520	1.79474	3.79241	1.26703	0.0110548	up	AT3G60670	PLATZ transcription factor family protein
Ghir_A03G001740	0.0823335	0.00365333	-4.26052	0.00669804	down	AT1G12370	photolyase 1
Ghir_A03G001860	0.22786	0	-7.96994	0.00869128	down	AT1G79740	hAT transposon superfamily
Ghir_A03G002140	0.03701	0	-4.78189	0.0131492	down	AT1G12740	cytochrome P450, family 87, subfamily A, polypeptide 2
Ghir_A03G002180	1.50359	0.339592	-1.90424	0.000540992	down	AT4G23060	IQ-domain 22
Ghir_A03G002480	0.415328	0.001771	-6.38957	0.000425367	down	AT4G00430	plasma membrane intrinsic protein 1;4
Ghir_A03G002570	0.124292	0.601512	2.45632	0.00480058	up	AT5G41350	RING/U-box superfamily protein
Ghir_A03G002680	0.14057	1.68909	3.59906	0.00509816	up
Ghir_A03G002710	0.030393	0	-5.38726	0.0336212	down	AT5G41410	POX (plant homeobox) family protein
Ghir_A03G002860	1.89797	0.0859883	-4.16996	4.06767e-07	down	AT5G57240	OSBP(oxysterol binding protein)-related protein 4C
Ghir_A03G002900	0	0.308108	28.5354	6.07628e-07	up	AT1G55535	unknown protein; FUNCTIONS IN: molecular_function unknown; INVOLVED IN: biological_process unknown; LOCATED IN: cellular_component unknown; EXPRESSED IN: cultured cell; BEST Arabidopsis thaliana protein match is: unknown protein (TAIR:AT3G13420.1); Has 35333 Blast hits to 34131 proteins in 2444 species: Archae - 798; Bacteria - 22429; Metazoa - 974; Fungi - 991; Plants - 531; Viruses - 0; Other E…
Ghir_A03G003070	0.075275	0	-5.26384	0.00339084	down	AT2G30370	allergen-related
Ghir_A03G003270	0.101441	0	-7.09713	0.00239775	down	AT2G38470	WRKY DNA-binding protein 33
Ghir_A03G003300	3.81983	18.9871	2.51944	5.76324e-05	up	AT5G58440	sorting nexin 2A
Ghir_A03G003500	1.11498	86.3235	6.47147	0.0106023	up	AT3G11110	RING/U-box superfamily protein
Ghir_A03G003520	3.92492	1.66662	-1.02492	4.88727e-05	down	AT1G07110	fructose-2,6-bisphosphatase
Ghir_A03G003570	0.09278	0	-5.98263	0.000488768	down	AT1G07150	mitogen-activated protein kinase kinase kinase 13
Ghir_A03G003750	0.0301085	1.33e-05	-4.12392	0.0495245	down	AT3G45020	Ribosomal L18p/L5e family protein
Ghir_A03G003780	1.16009	0.387253	-1.35875	0.00480412	down	AT3G45040	phosphatidate cytidylyltransferase family protein
Ghir_A03G003800	0.575569	0	-9.6408	0.000242635	down	AT2G28070	ABC-2 type transporter family protein
Ghir_A03G003870	0.215206	0	-7.38531	0.00303012	down	AT3G45100	UDP-Glycosyltransferase superfamily protein
Ghir_A03G003870	0.050541	0	-5.68777	0.00649737	down	AT3G45100	UDP-Glycosyltransferase superfamily protein
Ghir_A03G003870	0.145129	0	-7.24077	0.000343395	down	AT3G45100	UDP-Glycosyltransferase superfamily protein
Ghir_A03G003950	0.366393	0.0155787	-4.26515	0.000186812	down	AT5G60700	glycosyltransferase family protein 2
Ghir_A03G004490	0	0.0346903	5.80431	0.0488629	up	AT1G07710	Ankyrin repeat family protein
Ghir_A03G004560	0.271188	0	-7.51749	0.0183021	down	AT5G59750	DHBP synthase RibB-like alpha/beta domain;GTP cyclohydrolase II
Ghir_A03G004620	0.855445	0	-9.0028	5.12494e-08	down	AT5G59790	Domain of unknown function (DUF966)
Ghir_A03G004810	0.159465	3.18435	4.55359	0.0115851	up	AT3G46450	SEC14 cytosolic factor family protein / phosphoglyceride transfer family protein
Ghir_A03G004860	0	0.128505	22.4633	4.70749e-06	up	AT2G28800	63 kDa inner membrane family protein
Ghir_A03G004900	0.415936	0.00145167	-7.50106	0.00129361	down	AT1G06720	P-loop containing nucleoside triphosphate hydrolases superfamily protein
Ghir_A03G005190	1.48261	0.364064	-1.81067	0.000154296	down	AT1G07530	SCARECROW-like 14
Ghir_A03G005250	0	0.116296	21.6686	1.44112e-14	up	AT5G59480	Haloacid dehalogenase-like hydrolase (HAD) superfamily protein
Ghir_A03G005460	0	0.192877	7.19461	0.00420015	up	AT5G59160	type one serine/threonine protein phosphatase 2
Ghir_A03G005480	0.082487	0	-5.77441	0.00951074	down	AT1G07410	RAB GTPase homolog A2B
Ghir_A03G005660	1.08425	0.45916	-1.03166	0.0484165	down	AT1G34300	lectin protein kinase family protein
Ghir_A03G005730	0.055706	0.326262	2.67188	0.0471948	up	AT2G41350	unknown protein; BEST Arabidopsis thaliana protein match is: unknown protein (TAIR:AT2G21980.1); Has 188 Blast hits to 188 proteins in 66 species: Archae - 0; Bacteria - 12; Metazoa - 90; Fungi - 15; Plants - 54; Viruses - 0; Other Eukaryotes - 17 (source: NCBI BLink).
Ghir_A03G005800	0.940555	0.0704273	-3.49709	0.0298831	down	AT2G38080	Laccase/Diphenol oxidase family protein
Ghir_A03G006120	1.19128	0	-10.8267	0.000219079	down	AT5G24320	Transducin/WD40 repeat-like superfamily protein
Ghir_A03G006700	2.64504	0.671199	-1.76881	0.00608583	down	AT2G42490	Copper amine oxidase family protein
Ghir_A03G007000	4.30026	1.06372	-1.79527	0.00465684	down	AT5G04620	biotin F
Ghir_A03G007280	0.212949	0.023789	-3.06072	0.0402538	down	AT3G48510	unknown protein; BEST Arabidopsis thaliana protein match is: unknown protein (TAIR:AT5G63350.1); Has 98 Blast hits to 98 proteins in 11 species: Archae - 0; Bacteria - 0; Metazoa - 0; Fungi - 0; Plants - 98; Viruses - 0; Other Eukaryotes - 0 (source: NCBI BLink).
Ghir_A03G007310	0.815876	0.076569	-3.20432	0.0151227	down	AT5G50300	Xanthine/uracil permease family protein
Ghir_A03G007460	0.0576275	0.00538067	-2.57205	0.0389009	down	AT2G31880	Leucine-rich repeat protein kinase family protein
Ghir_A03G007780	0.331718	0.11438	-1.29268	0.0257932	down	AT1G74630	Tetratricopeptide repeat (TPR)-like superfamily protein
Ghir_A03G008190	30.4201	6.36596	-2.05421	0.000206681	down	AT5G08000	glucan endo-1,3-beta-glucosidase-like protein 3
Ghir_A03G008420	2.03605	0.890911	-1.00282	0.00454038	down	AT3G48810	Pentatricopeptide repeat (PPR) superfamily protein
Ghir_A03G008450	1.49287	0.0905927	-3.84792	0.0453256	down	AT3G42660	transducin family protein / WD-40 repeat family protein
Ghir_A03G008730	0	0.127537	8.0037	0.0329469	up	AT4G24730	Calcineurin-like metallo-phosphoesterase superfamily protein
Ghir_A03G008800	1.80443	0.59359	-1.38919	0.0054472	down	AT1G74790	catalytics
Ghir_A03G009120	0.487536	0	-8.95829	1.83257e-09	down	AT1G75400	RING/U-box superfamily protein
Ghir_A03G009180	0.154273	0.009282	-3.75198	0.000101606	down	AT4G36210	Protein of unknown function (DUF726)
Ghir_A03G009190	0.838228	0	-24.1229	0.000125085	down	AT4G16310	LSD1-like 3
Ghir_A03G009610	0	0.0759793	6.86418	0.0368821	up	AT3G52850	vacuolar sorting receptor homolog 1
Ghir_A03G009840	0.293859	0	-7.47901	0.0225168	down	AT2G02470	alfin-like 6
Ghir_A03G009970	0.130994	0.00289233	-4.22645	0.0481996	down	AT4G23160	cysteine-rich RLK (RECEPTOR-like protein kinase) 8
Ghir_A03G010030	1.15003	2.17062	1.13109	0.00506895	up	AT1G17100	SOUL heme-binding family protein
Ghir_A03G010250	0.10531	0.005575	-3.46988	0.0157499	down	AT3G17770	Dihydroxyacetone kinase
Ghir_A03G010340	19.5822	8.44655	-1.0117	0.01165	down	AT1G48480	receptor-like kinase 1
Ghir_A03G010380	0.025332	0	-4.87705	0.0276054	down	AT5G41980	CONTAINS InterPro DOMAIN/s: Putative harbinger transposase-derived nuclease (InterPro:IPR006912); BEST Arabidopsis thaliana protein match is: unknown protein (TAIR:AT1G43722.1); Has 1807 Blast hits to 1807 proteins in 277 species: Archae - 0; Bacteria - 0; Metazoa - 736; Fungi - 347; Plants - 385; Viruses - 0; Other Eukaryotes - 339 (source: NCBI BLink).
Ghir_A03G010930	117.856	251.973	1.30104	0.000167871	up	AT1G70370	polygalacturonase 2
Ghir_A03G011040	0	0.443205	9.29902	0.00760904	up	AT1G26110	decapping 5
Ghir_A03G011080	0.0830665	0.00940267	-2.97524	0.00367761	down	AT4G23160	cysteine-rich RLK (RECEPTOR-like protein kinase) 8
Ghir_A03G011100	0.234143	0.089077	-1.12791	0.0347428	down	AT4G21300	Tetratricopeptide repeat (TPR)-like superfamily protein
Ghir_A03G011120	1.93323	0.371027	-2.1629	3.3024e-06	down	AT1G14390	Leucine-rich repeat protein kinase family protein
Ghir_A03G011350	1.32135	0.46161	-1.29648	0.0165488	down	AT2G02710	PAS/LOV protein B
Ghir_A03G011400	0.835305	0	-9.59556	0.000570787	down	AT1G68570	Major facilitator superfamily protein
Ghir_A03G011410	0.0934995	0	-6.37804	5.47348e-05	down	AT1G69850	nitrate transporter 1:2
Ghir_A03G011460	0	0.0489477	5.94613	0.018423	up	AT3G11510	Ribosomal protein S11 family protein
Ghir_A03G011480	1.62893	0.370651	-1.89216	0.0121975	down	AT1G69580	Homeodomain-like superfamily protein
Ghir_A03G012010	0.14624	0	-7.22525	0.00055887	down	AT2G03810	18S pre-ribosomal assembly protein gar2-related
Ghir_A03G012290	0	1.75637	24.4677	2.33394e-08	up	AT2G37790	NAD(P)-linked oxidoreductase superfamily protein
Ghir_A03G012320	0.610247	0	-8.52997	0.00353546	down	AT2G37790	NAD(P)-linked oxidoreductase superfamily protein
Ghir_A03G012410	0.0891305	0	-6.42795	6.607e-05	down	AT4G21200	gibberellin 2-oxidase 8
Ghir_A03G012560	4.10328	10.3605	1.53556	0.00627272	up	AT1G14720	xyloglucan endotransglucosylase/hydrolase 28
Ghir_A03G012910	2.84225	1.17405	-1.0667	0.00319115	down	AT1G24265	Protein of unknown function (DUF1664)
Ghir_A03G013050	7.75884	3.24555	-1.05406	0.0055164	down	AT1G75080	Brassinosteroid signalling positive regulator (BZR1) family protein
Ghir_A03G013060	1.44783	0.490075	-1.34971	0.0286103	down	AT3G50410	OBF binding protein 1
Ghir_A03G013380	0.0628305	4.15742	6.16378	0.00347327	up	AT5G17190	FUNCTIONS IN: molecular_function unknown; INVOLVED IN: intracellular protein transport; LOCATED IN: endomembrane system, integral to membrane, endoplasmic reticulum; EXPRESSED IN: 23 plant structures; EXPRESSED DURING: 13 growth stages; CONTAINS InterPro DOMAIN/s: B-cell receptor-associated 31-like (InterPro:IPR008417); BEST Arabidopsis thaliana protein match is: unknown protein (TAIR:AT3G03160.1…
Ghir_A03G013410	0.212909	0.00943667	-3.96885	0.00248152	down	AT2G01630	O-Glycosyl hydrolases family 17 protein
Ghir_A03G013510	0.0088315	0.0969307	3.79806	7.9937e-05	up	AT1G70710	glycosyl hydrolase 9B1
Ghir_A03G013600	0.229101	1.55504	2.97658	0.0351576	up	AT2G01505	CLAVATA3/ESR-RELATED 16
Ghir_A03G013620	0.276241	0	-7.78267	0.00440748	down	AT2G42730	F-box family protein
Ghir_A03G013680	2.393	0.57935	-1.83411	0.0024493	down	AT1G15000	serine carboxypeptidase-like 50
Ghir_A03G013740	3.35414	0.200369	-3.79479	0.0108521	down	AT1G70950	TPX2 (targeting protein for Xklp2) protein family
Ghir_A03G013830	0.0435155	0.329312	3.16024	0.0335663	up	AT1G23010	Cupredoxin superfamily protein
Ghir_A03G013940	0.180653	0.0158373	-2.94865	0.0136426	down	AT2G01275	RING/FYVE/PHD zinc finger superfamily protein
Ghir_A03G014050	0.0415415	0.382708	3.37452	0.0152506	up	AT1G67325	Ran BP2/NZF zinc finger-like superfamily protein
Ghir_A03G014100	15.9424	42.1049	1.63115	0.0141943	up	AT1G67350	unknown protein; FUNCTIONS IN: molecular_function unknown; INVOLVED IN: photorespiration; LOCATED IN: mitochondrial membrane, mitochondrial respiratory chain complex I, respiratory chain complex I; EXPRESSED IN: 24 plant structures; EXPRESSED DURING: 15 growth stages; Has 2 Blast hits to 2 proteins in 1 species: Archae - 0; Bacteria - 0; Metazoa - 0; Fungi - 0; Plants - 2; Viruses - 0; Other Euka…
Ghir_A03G014430	0.689264	5.62945	3.26947	0.0365918	up	AT3G04120	glyceraldehyde-3-phosphate dehydrogenase C subunit 1
Ghir_A03G014460	0.312017	0.00194367	-6.55941	0.0172722	down	AT5G08430	SWIB/MDM2 domain;Plus-3;GYF
Ghir_A03G014540	0.529684	0.0306923	-4.01154	0.00249446	down	AT1G67710	response regulator 11
Ghir_A03G014570	0	0.132918	22.8624	1.27107e-13	up	AT1G24460	unknown protein; FUNCTIONS IN: molecular_function unknown; INVOLVED IN: biological_process unknown; LOCATED IN: cellular_component unknown; EXPRESSED IN: 23 plant structures; EXPRESSED DURING: 14 growth stages; BEST Arabidopsis thaliana protein match is: unknown protein (TAIR:AT4G31570.1); Has 181008 Blast hits to 85359 proteins in 3551 species: Archae - 3290; Bacteria - 48304; Metazoa - 70793; F…
Ghir_A03G014720	1.87757	0.180682	-3.16556	0.00285986	down	AT1G24530	Transducin/WD40 repeat-like superfamily protein
Ghir_A03G014920	1.20743	0.0939277	-3.50417	0.0381135	down	AT3G26430	GDSL-like Lipase/Acylhydrolase superfamily protein
Ghir_A03G015080	4.06191	9.27823	1.39526	0.012245	up	AT3G26510	Octicosapeptide/Phox/Bem1p family protein
Ghir_A03G015450	4.12676	25.3859	2.79259	0.0306005	up	AT1G60420	DC1 domain-containing protein
Ghir_A03G015960	0.60882	0.172717	-1.60342	0.0408907	down	AT1G59990	DEA(D/H)-box RNA helicase family protein
Ghir_A03G016290	0.525655	0.061345	-2.87056	0.0358982	down	AT3G01470	homeobox 1
Ghir_A03G016470	0.144667	0.005228	-4.11191	0.030683	down	AT1G68390	Core-2/I-branching beta-1,6-N-acetylglucosaminyltransferase family protein
Ghir_A03G016510	9.30014	0	-26.806	1.56038e-33	down	AT1G68410	Protein phosphatase 2C family protein
Ghir_A03G016590	5.50447	1.3721	-1.80476	0.00255994	down	AT2G01210	Leucine-rich repeat protein kinase family protein
Ghir_A03G017130	2.77573	0.823494	-1.5379	0.00191863	down	AT3G54680	proteophosphoglycan-related
Ghir_A03G017280	0	0.0893153	6.78733	0.00728042	up	AT5G19620	outer envelope protein of 80 kDa
Ghir_A03G017410	0.09578	2.37612	4.76012	0.00386958	up	AT4G03550	glucan synthase-like 5
Ghir_A03G018070	0.112267	0.0163783	-2.53644	0.0451238	down	AT3G21870	cyclin p2;1
Ghir_A03G018620	0.386696	0.0485287	-2.75692	0.00316265	down	AT5G45830	delay of germination 1
Ghir_A03G019250	1.04345	0.314613	-1.51402	0.0401959	down	AT1G02170	metacaspase 1
Ghir_A03G019390	0.706082	0	-9.75607	3.08062e-05	down	AT5G64330	Phototropic-responsive NPH3 family protein
Ghir_A03G019490	0.366428	0	-7.55498	0.0153968	down
Ghir_A03G019500	0.740259	0	-8.74513	0.00540898	down
Ghir_A03G019520	0.0808525	0	-5.82214	0.013194	down	AT2G22540	K-box region and MADS-box transcription factor family protein
Ghir_A03G019630	1.20406	0	-23.6292	3.03606e-20	down	AT2G14170	aldehyde dehydrogenase 6B2
Ghir_A03G019710	0.987148	0.256869	-1.68389	0.0398309	down	AT5G61930	Arabidopsis thaliana protein of unknown function (DUF794)
Ghir_A03G019970	0.326468	0	-6.87911	0.00105002	down	AT3G18280	Bifunctional inhibitor/lipid-transfer protein/seed storage 2S albumin superfamily protein
Ghir_A03G020010	7.32408	72.3465	3.50211	8.56773e-16	up	AT1G10200	GATA type zinc finger transcription factor family protein
Ghir_A03G020030	0.279705	0	-22.0697	1.48287e-09	down	AT4G33820	Glycosyl hydrolase superfamily protein
Ghir_A03G020180	13.3548	39.6128	1.82435	0.04703	up	AT2G23090	Uncharacterised protein family SERF
Ghir_A03G020290	11.9272	26.4764	1.32484	0.0098653	up	AT2G18990	thioredoxin domain-containing protein 9 homolog
Ghir_A03G020490	5.71738	1.76527	-1.49736	0.0338744	down	AT4G34160	CYCLIN D3;1
Ghir_A03G020600	3.85472	1.49605	-1.15458	0.00370986	down	AT2G23360	Plant protein of unknown function (DUF869)
Ghir_A03G020890	0.0091575	0	-5.07996	0.0438022	down	AT3G19050	phragmoplast orienting kinesin 2
Ghir_A03G020980	2.83538	0.825005	-1.58169	0.0105601	down	AT3G19120	PIF / Ping-Pong family of plant transposases
Ghir_A03G021160	0.928543	0	-23.9708	7.05874e-16	down	AT4G22200	potassium transport 2/3
Ghir_A03G021380	0.0367065	1.67142	5.60761	0.0001299	up	AT4G34540	NmrA-like negative transcriptional regulator family protein
Ghir_A03G021470	0.0235645	1.08894	5.70727	0.0461308	up	AT2G16370	thymidylate synthase 1
Ghir_A03G021680	0	0.144981	8.10267	0.000261714	up	AT2G21340	MATE efflux family protein
Ghir_A03G021790	4.74757	1.44541	-1.50414	0.0298831	down	AT4G34710	arginine decarboxylase 2
Ghir_A03G022030	3.18318	13.1228	2.2175	0.0118825	up	AT2G21210	SAUR-like auxin-responsive protein family
Ghir_A03G022230	5.51284	11.9276	1.31652	0.0334265	up	AT2G16700	actin depolymerizing factor 5
Ghir_A03G022250	2.87641	5.00259	1.00904	0.00125695	up	AT3G51260	20S proteasome alpha subunit PAD1
Ghir_A03G022470	1.94853	0	-10.199	8.9098e-13	down	AT2G41990	CONTAINS InterPro DOMAIN/s: Late embryogenesis abundant protein, group 2 (InterPro:IPR004864); BEST Arabidopsis thaliana protein match is: Late embryogenesis abundant (LEA) hydroxyproline-rich glycoprotein family (TAIR:AT4G35170.1); Has 172 Blast hits to 168 proteins in 15 species: Archae - 0; Bacteria - 0; Metazoa - 0; Fungi - 0; Plants - 172; Viruses - 0; Other Eukaryotes - 0 (source: NCBI BLin…
Ghir_A03G022510	0	16.727	13.0451	0.00141337	up	AT1G29500	SAUR-like auxin-responsive protein family
Ghir_A03G022630	0.120215	0	-5.75809	0.00893305	down	AT3G12500	basic chitinase
Ghir_A03G022650	0.120983	0	-6.70826	0.000153673	down	AT4G35250	NAD(P)-binding Rossmann-fold superfamily protein
Ghir_A03G022710	0	1.74744	10.9466	0.00014441	up
Ghir_A03G022770	1.13836	0.0800203	-3.56251	0.00243354	down	AT1G25270	nodulin MtN21 /EamA-like transporter family protein
Ghir_A03G022990	0	0.0680743	6.22985	0.00582974	up	AT4G21860	methionine sulfoxide reductase B 2
Ghir_A03G023030	1.27538	0.178767	-2.58107	0.00274931	down	AT4G17000	unknown protein; Has 2862 Blast hits to 2331 proteins in 349 species: Archae - 6; Bacteria - 408; Metazoa - 833; Fungi - 223; Plants - 134; Viruses - 7; Other Eukaryotes - 1251 (source: NCBI BLink).
Ghir_A03G023240	0.165689	0.853718	2.58592	0.0451965	up	AT1G34470	Protein of unknown function (DUF803)
Ghir_A03G023430	0	0.414703	9.7771	0.0170666	up	AT4G21120	amino acid transporter 1
Ghir_A03G023620	0.973853	7.96251	3.29534	0.0407856	up	AT2G35020	N-acetylglucosamine-1-phosphate uridylyltransferase 2
Ghir_A03G023740	0.088859	0.00317567	-4.24261	0.0386756	down	AT2G01830	CHASE domain containing histidine kinase protein
Ghir_A03G023820	0.894888	0.380628	-1.01965	0.036875	down	AT2G30160	Mitochondrial substrate carrier family protein
Ghir_A03G023890	1.11928	0	-10.4985	2.32448e-14	down	AT1G05230	homeodomain GLABROUS 2
Ghir_A04G000170	0.798279	0.169997	-2.04222	0.0378161	down
Ghir_A04G000460	0.287884	0.0146293	-4.09588	0.040553	down	AT4G26490	Late embryogenesis abundant (LEA) hydroxyproline-rich glycoprotein family
Ghir_A04G000480	0.251325	0	-8.73429	0.00485084	down	AT3G44730	kinesin-like protein 1
Ghir_A04G000510	0	0.0963957	6.66435	0.0125894	up	AT3G13226	regulatory protein RecX family protein
Ghir_A04G000560	0.014915	2.95135	7.7845	0.000132946	up	AT5G55860	Plant protein of unknown function (DUF827)
Ghir_A04G000960	0.216684	0	-7.38545	0.0141005	down	AT5G55530	Calcium-dependent lipid-binding (CaLB domain) family protein
Ghir_A04G000980	0.542433	0.173479	-1.43714	0.004521	down	AT5G55500	beta-1,2-xylosyltransferase
Ghir_A04G001030	0.389404	0.032761	-2.88391	0.000315055	down	AT5G55410	Bifunctional inhibitor/lipid-transfer protein/seed storage 2S albumin superfamily protein
Ghir_A04G001210	0.110344	0	-5.68909	0.0181102	down	AT2G31320	poly(ADP-ribose) polymerase 2
Ghir_A04G001970	0.071257	0	-5.73321	0.000999424	down	AT3G15160	unknown protein; Has 266 Blast hits to 264 proteins in 44 species: Archae - 0; Bacteria - 0; Metazoa - 58; Fungi - 0; Plants - 199; Viruses - 0; Other Eukaryotes - 9 (source: NCBI BLink).
Ghir_A04G002190	1.33593	0	-10.7206	5.65624e-09	down	AT5G54670	kinesin 3
Ghir_A04G002280	0.888607	0	-21.6068	2.43478e-17	down
Ghir_A04G002420	0.126625	0	-5.7341	0.000647604	down	AT5G54530	Protein of unknown function, DUF538
Ghir_A04G002590	0	0.12738	7.94739	0.0138271	up	AT4G27350	Protein of unknown function (DUF1223)
Ghir_A04G002600	0.0715375	0	-6.00748	0.0309423	down	AT5G54260	DNA repair and meiosis protein (Mre11)
Ghir_A04G002870	7.37819	1.16351	-2.47608	0.000209536	down
Ghir_A04G003260	0.37314	0	-22.957	7.45463e-05	down	AT4G27220	NB-ARC domain-containing disease resistance protein
Ghir_A04G003380	0	0.074626	6.76143	0.0112265	up	AT3G23550	MATE efflux family protein
Ghir_A04G003510	1.58601	0	-10.1945	2.3011e-13	down	AT5G53900	Serine/threonine-protein kinase WNK (With No Lysine)-related
Ghir_A04G003520	0	0.118288	21.3777	3.16197e-06	up	AT1G62930	Tetratricopeptide repeat (TPR)-like superfamily protein
Ghir_A04G003670	0.180164	0.323053	1.06494	0.0203031	up	AT4G27190	NB-ARC domain-containing disease resistance protein
Ghir_A04G003730	0.123832	0	-8.11383	0.014974	down	AT3G03300	dicer-like 2
Ghir_A04G003760	0.113799	0	-6.52975	1.47896e-05	down	AT5G62220	glycosyltransferase 18
Ghir_A04G003880	0.073586	0	-5.62107	0.00986706	down	AT1G73160	UDP-Glycosyltransferase superfamily protein
Ghir_A04G004040	23.8897	0.10284	-7.55729	2.56818e-11	down	ATCG00040	maturase K
Ghir_A04G004160	1.12859	0	-9.70789	0.0061362	down	AT1G16670	Protein kinase superfamily protein
Ghir_A04G004580	0.017032	0	-4.93684	0.0344181	down	AT1G78580	trehalose-6-phosphate synthase
Ghir_A04G005170	0.260387	0	-21.2286	0.000107074	down	AT1G79080	Pentatricopeptide repeat (PPR) superfamily protein
Ghir_A04G005190	1.24957	0.406639	-1.38718	0.0170182	down	AT1G79420	Protein of unknown function (DUF620)
Ghir_A04G005250	0.962225	0.363007	-1.18165	0.0344587	down	AT3G19330	Protein of unknown function (DUF677)
Ghir_A04G005400	0	0.455208	24.6753	1.40742e-15	up	AT2G23950	Leucine-rich repeat protein kinase family protein
Ghir_A04G005610	0.060566	0	-5.61875	0.0145567	down	AT3G54750	unknown protein; FUNCTIONS IN: molecular_function unknown; INVOLVED IN: biological_process unknown; LOCATED IN: cellular_component unknown; EXPRESSED IN: 24 plant structures; EXPRESSED DURING: 15 growth stages.
Ghir_A04G005630	3.01212	0	-12.4082	6.90466e-12	down	AT5G06600	ubiquitin-specific protease 12
Ghir_A04G006160	0.482177	0.0674327	-2.66045	0.000773774	down	AT3G12040	DNA-3-methyladenine glycosylase (MAG)
Ghir_A04G006190	0.876997	0.0256017	-4.85724	0.0170761	down	AT2G41970	Protein kinase superfamily protein
Ghir_A04G006660	0	0.130505	6.58866	0.0054352	up	AT3G09970	Calcineurin-like metallo-phosphoesterase superfamily protein
Ghir_A04G006700	0.178	0.0118213	-4.28524	3.77013e-06	down	AT3G52870	IQ calmodulin-binding motif family protein
Ghir_A04G006960	0.146389	0	-7.31056	0.00649703	down	AT3G52660	RNA-binding (RRM/RBD/RNP motifs) family protein
Ghir_A04G007020	0.064361	0.009906	-2.26682	0.0156032	down	AT2G36026	Ovate family protein
Ghir_A04G007040	0.0390335	0.17195	2.33317	0.0292933	up	AT3G11620	alpha/beta-Hydrolases superfamily protein
Ghir_A04G007340	0.0635195	1.97e-05	-5.65388	0.00959208	down	ATMG00820	Reverse transcriptase (RNA-dependent DNA polymerase)
Ghir_A04G007380	0.149086	1.14977	3.12945	0.0054484	up	AT4G12080	AT-hook motif nuclear-localized protein 1
Ghir_A04G007610	0.235121	0	-6.93305	0.00482088	down	AT5G03560	Tetratricopeptide repeat (TPR)-like superfamily protein
Ghir_A04G007650	0.192452	0	-7.02341	0.0100786	down	AT2G36690	2-oxoglutarate (2OG) and Fe(II)-dependent oxygenase superfamily protein
Ghir_A04G007750	0.0609465	0	-6.12653	0.0402328	down	AT3G53180	glutamate-ammonia ligases;catalytics;glutamate-ammonia ligases
Ghir_A04G007780	1.05913	0.385686	-1.25305	0.00440748	down	AT3G09920	phosphatidyl inositol monophosphate 5 kinase
Ghir_A04G008120	3.1358	0.522515	-2.36793	0.0164124	down	AT2G37040	PHE ammonia lyase 1
Ghir_A04G008200	0.101219	0	-5.68747	0.00812969	down	AT2G37210	lysine decarboxylase family protein
Ghir_A04G008240	0.311996	0	-6.08558	6.49973e-05	down	AT5G03230	Protein of unknown function, DUF584
Ghir_A04G008260	12.062	28.7213	1.44271	0.00333097	up	AT3G01390	vacuolar membrane ATPase 10
Ghir_A04G008280	0.249589	2.37572	3.478	0.037877	up	AT3G53390	Transducin/WD40 repeat-like superfamily protein
Ghir_A04G008390	0	0.180936	20.6767	0.000780021	up	AT5G03110	FUNCTIONS IN: molecular_function unknown; INVOLVED IN: biological_process unknown; LOCATED IN: plasma membrane; BEST Arabidopsis thaliana protein match is: protamine P1 family protein (TAIR:AT2G37100.1); Has 81 Blast hits to 73 proteins in 9 species: Archae - 0; Bacteria - 0; Metazoa - 0; Fungi - 0; Plants - 81; Viruses - 0; Other Eukaryotes - 0 (source: NCBI BLink).
Ghir_A04G008560	1.21042	0.249623	-2.05966	0.0102173	down	AT3G12620	Protein phosphatase 2C family protein
Ghir_A04G008640	0.0294555	0.265707	3.35644	0.0202768	up	AT3G09560	Lipin family protein
Ghir_A04G008730	0.0787435	0	-5.53893	0.0036969	down	AT5G02580	Plant protein 1589 of unknown function
Ghir_A04G008770	0.228801	0.0392273	-2.27434	0.0379796	down	AT2G37440	DNAse I-like superfamily protein
Ghir_A04G008930	0.165078	0	-8.12989	0.000242635	down	AT2G37570	HSP20-like chaperones superfamily protein
Ghir_A04G009020	0.1802	0	-6.33779	0.0187481	down	AT4G23160	cysteine-rich RLK (RECEPTOR-like protein kinase) 8
Ghir_A04G009860	0.07655	0	-5.33094	0.0325535	down
Ghir_A04G009870	0.211005	0	-7.12103	0.0325632	down	AT1G48175	Cytidine/deoxycytidylate deaminase family protein
Ghir_A04G009880	0.151	0.012772	-3.20095	0.0342564	down	AT1G55480	protein containing PDZ domain, a K-box domain, and a TPR region
Ghir_A04G009910	0	2.79334	33.3794	6.63307e-06	up	AT3G51850	calcium-dependent protein kinase 13
Ghir_A04G009920	0.197217	0	-7.01873	0.00118516	down	AT2G38250	Homeodomain-like superfamily protein
Ghir_A04G009950	0.056909	0	-5.1997	0.00454038	down	AT5G01370	ALC-interacting protein 1
Ghir_A04G010270	2.26352	4.24983	1.11626	0.0272133	up
Ghir_A04G010360	1.21953	0.463886	-1.1775	0.0326481	down	AT3G08800	ARM repeat superfamily protein
Ghir_A04G010510	0.742965	0.184875	-1.78472	0.000937486	down	AT5G62620	Galactosyltransferase family protein
Ghir_A04G010780	0.108401	0	-5.8403	0.00335601	down	AT1G09530	phytochrome interacting factor 3
Ghir_A04G011130	0.000377	1.22461	10.043	0.000285931	up	AT4G28310	unknown protein; BEST Arabidopsis thaliana protein match is: unknown protein (TAIR:AT1G52270.1); Has 30201 Blast hits to 17322 proteins in 780 species: Archae - 12; Bacteria - 1396; Metazoa - 17338; Fungi - 3422; Plants - 5037; Viruses - 0; Other Eukaryotes - 2996 (source: NCBI BLink).
Ghir_A04G011340	2.51082	14.2739	2.69075	0.00667776	up	AT2G20820	unknown protein; Has 44 Blast hits to 44 proteins in 13 species: Archae - 0; Bacteria - 0; Metazoa - 0; Fungi - 0; Plants - 44; Viruses - 0; Other Eukaryotes - 0 (source: NCBI BLink).
Ghir_A04G011490	0.133701	0	-6.92353	0.0286133	down	AT4G16740	terpene synthase 03
Ghir_A04G011660	0.118047	0	-6.33024	1.57162e-05	down	AT5G08280	hydroxymethylbilane synthase
Ghir_A04G011900	5.6149	0.03226	-7.11068	3.10155e-05	down	AT5G23395	Cox19-like CHCH family protein
Ghir_A04G012310	0.160465	0	-6.51046	0.0159485	down	AT5G64210	alternative oxidase 2
Ghir_A04G012370	36.7098	7.12602	-2.21763	0.0252815	down	AT5G64260	EXORDIUM like 2
Ghir_A04G012470	0	0.0804833	6.64322	0.00474003	up	AT5G09550	GDP dissociation inhibitor family protein / Rab GTPase activator family protein
Ghir_A04G012580	0.0274015	0	-4.73612	0.0479723	down	AT5G10530	Concanavalin A-like lectin protein kinase family protein
Ghir_A04G012800	204.132	928.353	2.35573	0.0263272	up	AT1G50010	tubulin alpha-2 chain
Ghir_A04G013200	0.015956	0.565015	5.38764	0.0107956	up	AT2G15900	Phox-associated domain;Phox-like;Sorting nexin, C-terminal
Ghir_A04G013310	1.11248	0.178239	-2.4578	0.0189983	down	AT1G07750	RmlC-like cupins superfamily protein
Ghir_A04G013330	0.085839	0	-5.01273	0.014715	down
Ghir_A04G013730	0.41294	0	-7.93674	0.0013527	down	AT4G35160	O-methyltransferase family protein
Ghir_A04G013900	2.25675	0.25449	-2.92018	0.000135743	down	AT1G43670	Inositol monophosphatase family protein
Ghir_A04G014110	2.01689	0	-11.3998	5.05973e-12	down	AT1G58440	FAD/NAD(P)-binding oxidoreductase family protein
Ghir_A04G014260	0.399092	0.705769	1.02303	0.036875	up
Ghir_A04G014340	2.70019	1.10893	-1.07146	0.00454038	down	AT1G58100	TCP family transcription factor
Ghir_A04G014400	0	0.114487	22.7871	2.63572e-06	up	AT1G09795	ATP phosphoribosyl transferase 2
Ghir_A04G014630	0.675986	0.137628	-2.06866	0.000188877	down	AT5G63700	zinc ion binding;DNA binding
Ghir_A04G014940	0.0088375	0.110672	3.87039	0.0169299	up	AT1G13120
Ghir_A04G015060	0.800055	0.066887	-3.39465	0.000141788	down	AT3G13080	multidrug resistance-associated protein 3
Ghir_A04G015100	1.08181	0	-24.7484	7.63057e-14	down	AT1G67550	urease
Ghir_A04G015160	0.821233	2.05573	1.51046	0.00535706	up	AT1G67360	Rubber elongation factor protein (REF)
Ghir_A04G015240	0	0.0412663	5.83791	0.0264722	up	AT1G32490	RNA helicase family protein
Ghir_A04G015430	0.0377365	0.277915	3.00745	0.0132252	up	AT1G15000	serine carboxypeptidase-like 50
Ghir_A04G015460	6.06133	11.5959	1.1387	0.0015739	up	AT1G70670	Caleosin-related family protein
Ghir_A04G016030	0	0.0498743	5.81987	0.019631	up	AT1G14420	Pectate lyase family protein
Ghir_A04G016220	0.0753275	0	-5.79948	0.0417763	down	AT4G35390	AT-hook protein of GA feedback 1
Ghir_A04G016390	0.988536	0.241712	-1.7973	0.00682609	down	AT1G64860	sigma factor A
Ghir_A05G000130	0.913223	0.0428503	-4.17152	0.0377456	down
Ghir_A05G000650	0.724668	3.20129	2.31616	0.0319817	up	AT4G30310	FGGY family of carbohydrate kinase
Ghir_A05G001080	5.22429	1.60899	-1.48293	1.41699e-05	down	AT3G55430	O-Glycosyl hydrolases family 17 protein
Ghir_A05G001480	0.094222	0	-6.77618	0.000104143	down	AT5G33280	Voltage-gated chloride channel family protein
Ghir_A05G001520	74.5853	16.9422	-1.95943	0.00474418	down	AT2G10940	Bifunctional inhibitor/lipid-transfer protein/seed storage 2S albumin superfamily protein
Ghir_A05G001590	0.871369	0	-9.05541	1.41456e-05	down	AT5G20230	blue-copper-binding protein
Ghir_A05G001650	2.01808	0.350384	-2.3402	0.00010078	down	AT2G25490	EIN3-binding F box protein 1
Ghir_A05G002000	0.785856	0.0358623	-4.13452	0.0147288	down	AT4G30380	Barwin-related endoglucanase
Ghir_A05G002010	2.32204	0.047133	-5.34431	0.00330121	down	AT5G19990	regulatory particle triple-A ATPase 6A
Ghir_A05G002330	2.47458	0.286236	-2.90507	0.0196941	down	AT3G24503	aldehyde dehydrogenase 2C4
Ghir_A05G002380	0	0.072398	6.39146	0.0317682	up	AT3G24520	heat shock transcription factor C1
Ghir_A05G002590	7.761	2.09409	-1.67111	5.61163e-05	down	AT4G29080	phytochrome-associated protein 2
Ghir_A05G002650	0.186738	0.0539563	-1.54935	0.0337958	down	AT2G20010	Protein of unknown function (DUF810)
Ghir_A05G002840	0.300119	0.0548017	-2.18678	0.00246095	down	AT4G26270	phosphofructokinase 3
Ghir_A05G002920	0.54996	0	-25.4063	3.5471e-13	down	AT5G56730	Insulinase (Peptidase family M16) protein
Ghir_A05G003260	1.54662	4.74321	1.81502	0.0275533	up	AT4G33080	AGC (cAMP-dependent, cGMP-dependent and protein kinase C) kinase family protein
Ghir_A05G003580	0.0635465	0	-5.599	0.0096388	down	AT3G42880	Leucine-rich repeat protein kinase family protein
Ghir_A05G003620	1.57367	3.05195	1.15865	0.0208539	up	AT1G19210	Integrase-type DNA-binding superfamily protein
Ghir_A05G004000	1.04248	0.154453	-2.52975	0.000691192	down	AT1G02180	ferredoxin-related
Ghir_A05G004020	5.5873	1.37586	-1.81254	0.00537136	down	AT5G21482	cytokinin oxidase 7
Ghir_A05G004160	0.150634	27.9435	7.64219	0.000219079	up	AT5G26180	S-adenosyl-L-methionine-dependent methyltransferases superfamily protein
Ghir_A05G004180	5.24698	1.74506	-1.3716	0.0451006	down	AT4G33110	S-adenosyl-L-methionine-dependent methyltransferases superfamily protein
Ghir_A05G004330	0.102308	0	-6.09264	0.00165765	down	AT2G26170	cytochrome P450, family 711, subfamily A, polypeptide 1
Ghir_A05G004340	0.128709	0	-6.33345	0.00134209	down	AT4G33040	Thioredoxin superfamily protein
Ghir_A05G004450	0.522359	5.75936	3.65814	0.0257464	up	AT5G11850	Protein kinase superfamily protein
Ghir_A05G004490	1.02083	0.131837	-2.68066	5.45468e-06	down	AT4G33000	calcineurin B-like protein 10
Ghir_A05G004640	0.483174	17.8845	5.35969	0.0252202	up	AT5G11740	arabinogalactan protein 15
Ghir_A05G004760	2.13272	0	-9.83432	2.44015e-05	down	AT2G37410	translocase inner membrane subunit 17-2
Ghir_A05G004770	0.327919	0.0360893	-2.81715	0.011366	down	AT1G51950	indole-3-acetic acid inducible 18
Ghir_A05G004840	1.47846	0.437288	-1.55577	0.00104893	down	AT4G32880	homeobox gene 8
Ghir_A05G005040	2.22099	0.41554	-2.19715	1.81605e-09	down	AT4G32730	Homeodomain-like protein
Ghir_A05G005110	3.05058	5.62868	1.07231	0.0367033	up	AT5G25610	BURP domain-containing protein
Ghir_A05G005180	0.080684	0	-5.38714	0.038016	down	AT4G32660	Protein kinase superfamily protein
Ghir_A05G005310	0.197676	0.0264363	-2.68326	0.0166352	down	AT4G31020	alpha/beta-Hydrolases superfamily protein
Ghir_A05G005370	0.17274	0.552484	1.88413	0.0357107	up	AT5G58170	SHV3-like 5
Ghir_A05G005440	11.2361	2.31391	-2.08245	0.0088081	down	AT4G30960	SOS3-interacting protein 3
Ghir_A05G005470	1.3502	0	-10.7007	1.33302e-09	down	AT5G57990	ubiquitin-specific protease 23
Ghir_A05G005500	0.34472	0.902961	1.5622	0.0389009	up	AT4G28088	Low temperature and salt responsive protein family
Ghir_A05G005640	0.187111	0.0181207	-3.04117	0.0223901	down	AT5G25370	phospholipase D alpha 3
Ghir_A05G005720	2.80246	12.7239	2.39176	0.0126031	up	AT5G57970	DNA glycosylase superfamily protein
Ghir_A05G005830	0.186264	0	-7.24803	0.0475347	down	AT5G25310	Exostosin family protein
Ghir_A05G005880	0.00912	1.74171	7.57075	0.000510491	up	AT1G80490	TOPLESS-related 1
Ghir_A05G005930	0.378473	0.030456	-3.41157	0.0108019	down	AT5G25220	KNOTTED1-like homeobox gene 3
Ghir_A05G005940	0	1.03893	11.2042	0.00166996	up	AT4G32030	unknown protein; BEST Arabidopsis thaliana protein match is: unknown protein (TAIR:AT1G80610.1); Has 63 Blast hits to 59 proteins in 12 species: Archae - 0; Bacteria - 0; Metazoa - 6; Fungi - 0; Plants - 53; Viruses - 0; Other Eukaryotes - 4 (source: NCBI BLink).
Ghir_A05G005960	10.2128	2.54891	-1.79911	3.43959e-16	down	AT4G31990	aspartate aminotransferase 5
Ghir_A05G006010	1.65264	0.023623	-5.89571	0.000578943	down	AT5G10970	C2H2 and C2HC zinc fingers superfamily protein
Ghir_A05G006080	0.216339	3.27721	4.12578	5.23878e-29	up	AT2G24270	aldehyde dehydrogenase 11A3
Ghir_A05G006150	0.160208	0	-6.56752	0.0451238	down	AT4G31805	WRKY family transcription factor
Ghir_A05G006280	0.755927	0.0191827	-4.8785	3.46085e-09	down	AT5G25050	Major facilitator superfamily protein
Ghir_A05G006290	1.35974	0.139405	-3.01131	2.03498e-13	down	AT2G24820	translocon at the inner envelope membrane of chloroplasts 55-II
Ghir_A05G006390	0.065144	0	-5.7208	0.037877	down	AT5G10770	Eukaryotic aspartyl protease family protein
Ghir_A05G006400	0.149845	0	-6.98355	9.6467e-06	down	AT5G10770	Eukaryotic aspartyl protease family protein
Ghir_A05G006650	1.68652	0	-10.588	6.48292e-05	down	AT5G24870	RING/U-box superfamily protein
Ghir_A05G006830	2.23054	0.540275	-1.8332	9.22012e-05	down	AT4G31115	Protein of unknown function (DUF1997)
Ghir_A05G007030	41.6368	3.29731	-3.43998	0.00397953	down	AT4G12320	cytochrome P450, family 706, subfamily A, polypeptide 6
Ghir_A05G007600	0.111291	0	-5.59513	0.00657995	down
Ghir_A05G007760	2.26769	0.718213	-1.44636	0.0330102	down	AT5G60210	ROP interactive partner 5
Ghir_A05G007820	0.119926	0	-5.54812	0.00178679	down
Ghir_A05G007880	0	34.4377	27.5889	9.52497e-11	up	AT2G27030	calmodulin 5
Ghir_A05G008100	0.0788145	0	-6.92583	2.1361e-05	down	AT2G35940	BEL1-like homeodomain 1
Ghir_A05G008150	0	0.0198547	5.35166	0.0406091	up	AT1G03060	Beige/BEACH domain ;WD domain, G-beta repeat protein
Ghir_A05G008210	0.547872	0	-8.49306	6.9595e-10	down	AT5G22290	NAC domain containing protein 89
Ghir_A05G008530	0	0.123614	7.13058	0.0163846	up	AT2G27600	AAA-type ATPase family protein
Ghir_A05G008670	0.258035	0.0108513	-4.13601	0.00319641	down	AT2G27770	Plant protein of unknown function (DUF868)
Ghir_A05G008790	2.84216	16.5253	2.74656	0.000286404	up	AT5G22870	Late embryogenesis abundant (LEA) hydroxyproline-rich glycoprotein family
Ghir_A05G008900	1.66027	0.431	-1.71155	0.000469846	down	AT2G28190	copper/zinc superoxide dismutase 2
Ghir_A05G008940	0	0.127611	7.13725	0.0111464	up	AT3G54890	photosystem I light harvesting complex gene 1
Ghir_A05G009080	0.0566585	0	-5.79899	0.0209802	down	AT3G51860	cation exchanger 3
Ghir_A05G009100	1.93481	0	-26.5374	9.37255e-28	down	AT2G29890	villin-like 1
Ghir_A05G009220	4.77038	1.76622	-1.22061	0.00465684	down	AT2G38090	Duplicated homeodomain-like superfamily protein
Ghir_A05G009660	0.0822305	0	-6.66248	0.00987184	down	AT2G29060	GRAS family transcription factor
Ghir_A05G009730	6.76573	2.44878	-1.25953	0.0179971	down	AT2G39700	expansin A4
Ghir_A05G009800	0.0239605	0.132663	2.80357	0.00685097	up	AT3G46540	ENTH/VHS family protein
Ghir_A05G009860	1.33819	0	-10.159	7.45991e-06	down	AT5G59350	unknown protein; FUNCTIONS IN: molecular_function unknown; INVOLVED IN: biological_process unknown; LOCATED IN: endomembrane system; EXPRESSED IN: 23 plant structures; EXPRESSED DURING: 13 growth stages; Has 1807 Blast hits to 1807 proteins in 277 species: Archae - 0; Bacteria - 0; Metazoa - 736; Fungi - 347; Plants - 385; Viruses - 0; Other Eukaryotes - 339 (source: NCBI BLink).
Ghir_A05G009940	0.21267	0	-7.11123	0.000285736	down	AT5G24910	cytochrome P450, family 714, subfamily A, polypeptide 1
Ghir_A05G009970	0.380356	0	-8.15224	0.000908896	down	AT3G55350	PIF / Ping-Pong family of plant transposases
Ghir_A05G010030	0.652567	0.0390367	-3.85501	0.0181025	down	AT1G07745	homolog of RAD51 D
Ghir_A05G010080	0.539339	4.31619	3.19143	0.000822174	up	AT3G46220	unknown protein; CONTAINS InterPro DOMAIN/s: Protein of unknown function DUF2042 (InterPro:IPR018611); Has 559 Blast hits to 533 proteins in 154 species: Archae - 3; Bacteria - 32; Metazoa - 305; Fungi - 42; Plants - 50; Viruses - 3; Other Eukaryotes - 124 (source: NCBI BLink).
Ghir_A05G010120	0.482295	0	-24.5064	7.96074e-25	down	AT5G59980	Polymerase/histidinol phosphatase-like
Ghir_A05G010440	0.225749	0.020378	-3.08772	0.0151806	down	AT3G43790	zinc induced facilitator-like 2
Ghir_A05G010680	1.72102	0.228195	-2.73787	0.0297307	down	AT2G28305	Putative lysine decarboxylase family protein
Ghir_A05G010850	4.13791	1.74531	-1.03295	6.08904e-06	down	AT5G60760	P-loop containing nucleoside triphosphate hydrolases superfamily protein
Ghir_A05G010890	0.446968	0	-9.37733	8.45594e-07	down	AT2G28070	ABC-2 type transporter family protein
Ghir_A05G011140	0	0.004337	18.956	0.000491832	up	AT2G30170	Protein phosphatase 2C family protein
Ghir_A05G011680	0.063826	0	-5.76622	0.0172551	down	AT4G31540	exocyst subunit exo70 family protein G1
Ghir_A05G012220	1.00261	0.259398	-1.74533	0.00462917	down	AT1G80870	Protein kinase superfamily protein
Ghir_A05G012260	0.050465	0	-21.0731	3.28756e-12	down	AT2G07680	multidrug resistance-associated protein 11
Ghir_A05G012300	0.293422	0	-7.85063	0.00541195	down	AT1G80840	WRKY DNA-binding protein 40
Ghir_A05G012420	0.117188	0	-5.54711	0.00129361	down	AT5G25190	Integrase-type DNA-binding superfamily protein
Ghir_A05G012690	0.115613	0	-6.05414	0.000280916	down	AT3G15810	Protein of unknown function (DUF567)
Ghir_A05G012710	0.152884	0.010315	-3.5446	0.000505337	down	AT1G15520	pleiotropic drug resistance 12
Ghir_A05G012730	0.289392	0	-9.05218	0.000628507	down	AT1G15520	pleiotropic drug resistance 12
Ghir_A05G012970	0.66789	1.26258	1.11631	0.0316225	up	AT3G15780	unknown protein; BEST Arabidopsis thaliana protein match is: unknown protein (TAIR:AT1G52550.1); Has 20 Blast hits to 20 proteins in 5 species: Archae - 0; Bacteria - 0; Metazoa - 0; Fungi - 0; Plants - 20; Viruses - 0; Other Eukaryotes - 0 (source: NCBI BLink).
Ghir_A05G013150	0	0.0973647	26.9365	0.000352089	up	AT1G79990	structural molecules
Ghir_A05G013450	12.4845	2.65264	-2.03672	0.0102424	down	AT4G29080	phytochrome-associated protein 2
Ghir_A05G013550	2.20229	0.498509	-1.93535	0.00227747	down	AT1G52150	Homeobox-leucine zipper family protein / lipid-binding START domain-containing protein
Ghir_A05G013650	0	0.129897	28.6927	2.85271e-08	up	AT3G16490	IQ-domain 26
Ghir_A05G013990	2.87414	13.4506	2.43768	3.3024e-06	up	AT5G56890	Protein kinase superfamily protein
Ghir_A05G014160	0.078777	0.011294	-2.50565	0.024915	down	AT4G33090	aminopeptidase M1
Ghir_A05G014600	1.98819	0.416805	-2.05514	0.00069458	down	AT1G53840	pectin methylesterase 1
Ghir_A05G014620	0.410571	0.0155477	-4.41773	0.000472379	down	AT1G72320	pumilio 23
Ghir_A05G014840	0.799558	2.0619	1.59533	0.0030671	up	AT1G76750	Protein of unknown function (DUF1278)
Ghir_A05G014950	1.08867	0	-10.7002	5.90947e-08	down	AT5G45030	Trypsin family protein
Ghir_A05G015050	0.181622	0	-8.28587	1.39025e-06	down	AT1G30330	auxin response factor 6
Ghir_A05G015180	0.910891	0.112054	-2.73665	0.000101386	down	AT3G14420	Aldolase-type TIM barrel family protein
Ghir_A05G015310	7.38802	1.99813	-1.67242	7.3975e-05	down	AT1G29980	Protein of unknown function, DUF642
Ghir_A05G015340	0.524351	0.0416097	-3.41698	0.000504767	down	AT2G34500	cytochrome P450, family 710, subfamily A, polypeptide 1
Ghir_A05G015430	0.162484	0	-7.17865	0.00251644	down	AT1G23465	Peptidase S24/S26A/S26B/S26C family protein
Ghir_A05G015590	3.74089	0	-11.2011	1.55906e-10	down
Ghir_A05G015640	0.353264	0	-5.78127	0.00239775	down	AT2G34340	Protein of unknown function, DUF584
Ghir_A05G015670	1.62421	0.675573	-1.04328	0.0149688	down	AT5G45660	unknown protein; FUNCTIONS IN: molecular_function unknown; INVOLVED IN: biological_process unknown; LOCATED IN: endomembrane system; Has 35333 Blast hits to 34131 proteins in 2444 species: Archae - 798; Bacteria - 22429; Metazoa - 974; Fungi - 991; Plants - 531; Viruses - 0; Other Eukaryotes - 9610 (source: NCBI BLink).
Ghir_A05G015840	0.087092	0	-5.94771	0.000381096	down	AT1G29280	WRKY DNA-binding protein 65
Ghir_A05G016070	0.175777	0	-21.4292	1.45615e-08	down	AT5G45900	ThiF family protein
Ghir_A05G016540	4.01194	9.91292	1.48997	9.55176e-06	up	AT5G49800	Polyketide cyclase/dehydrase and lipid transport superfamily protein
Ghir_A05G016560	0.86507	0	-24.0116	8.26285e-08	down	AT1G28310	Dof-type zinc finger DNA-binding family protein
Ghir_A05G016960	0.10793	0	-6.63942	0.009565	down	AT5G18390	Pentatricopeptide repeat (PPR) superfamily protein
Ghir_A05G016960	0.444649	0	-8.76435	1.4409e-08	down	AT5G18390	Pentatricopeptide repeat (PPR) superfamily protein
Ghir_A05G017040	33.0166	59.2293	1.03835	0.0205224	up	AT1G61260	Protein of unknown function (DUF761)
Ghir_A05G017250	0.412052	0	-21.9167	3.10317e-16	down	AT1G11380	PLAC8 family protein
Ghir_A05G017270	0.0679735	0	-6.35228	0.00309994	down	AT4G27290	S-locus lectin protein kinase family protein
Ghir_A05G017470	0.736496	0.122459	-2.33113	0.00940923	down	AT1G61850	phospholipases;galactolipases
Ghir_A05G017890	4.12164	1.64774	-1.12218	0.0125628	down	AT3G07880	Immunoglobulin E-set superfamily protein
Ghir_A05G018390	0.364934	0.0639473	-2.25658	0.0458679	down	AT5G42320	Zn-dependent exopeptidases superfamily protein
Ghir_A05G018590	2.39336	0.695547	-1.60085	3.70792e-05	down	AT4G38430	rho guanyl-nucleotide exchange factor 1
Ghir_A05G018610	0.0588985	0	-5.0102	0.0376077	down	AT1G76110	HMG (high mobility group) box protein with ARid/BRIGHT DNA-binding domain
Ghir_A05G018670	0.054118	0	-5.07385	0.0244456	down	AT1G76070	unknown protein; FUNCTIONS IN: molecular_function unknown; INVOLVED IN: biological_process unknown; LOCATED IN: plasma membrane; EXPRESSED IN: 8 plant structures; EXPRESSED DURING: LP.04 four leaves visible, 4 anthesis, petal differentiation and expansion stage; BEST Arabidopsis thaliana protein match is: unknown protein (TAIR:AT1G20310.1); Has 66 Blast hits to 66 proteins in 15 species: Archae -…
Ghir_A05G018710	0.113069	0	-6.34584	0.00197659	down	AT1G76040	calcium-dependent protein kinase 29
Ghir_A05G018740	0.0785935	0.002193	-4.50515	0.043448	down	AT1G60420	DC1 domain-containing protein
Ghir_A05G018750	2.95952	0.120752	-4.37709	0.0367571	down	AT1G60420	DC1 domain-containing protein
Ghir_A05G018930	0.345606	0	-8.83935	0.000140405	down	AT1G20060	ATP binding microtubule motor family protein
Ghir_A05G018940	0.734311	0	-10.217	6.03816e-06	down	AT4G24200	Transcription elongation factor (TFIIS) family protein
Ghir_A05G018980	1.43523	0.401597	-1.62896	0.00696883	down	AT1G75800	Pathogenesis-related thaumatin superfamily protein
Ghir_A05G019370	0	0.156599	9.24717	0.00842095	up	AT1G19720	Pentatricopeptide repeat (PPR-like) superfamily protein
Ghir_A05G019590	0.0837775	0	-5.70407	0.00982453	down	AT1G19640	jasmonic acid carboxyl methyltransferase
Ghir_A05G019660	1.01312	0.304523	-1.54532	0.00597033	down	AT1G19600	pfkB-like carbohydrate kinase family protein
Ghir_A05G019770	0.711857	0	-9.57762	6.50813e-05	down	AT1G47330	CBS domain-containing protein with a domain of unknown function (DUF21)
Ghir_A05G019840	0.224512	0	-8.26203	0.000841981	down	AT1G75170	Sec14p-like phosphatidylinositol transfer family protein
Ghir_A05G020080	0.0188825	0	-3.87763	0.0425911	down	AT5G42610	Protein of unknown function (DUF607)
Ghir_A05G020100	0.153126	0	-7.27561	2.46127e-05	down	AT1G75050	Pathogenesis-related thaumatin superfamily protein
Ghir_A05G020170	9.65265	24.9161	1.56893	0.00556333	up	AT5G42655	Disease resistance-responsive (dirigent-like protein) family protein
Ghir_A05G020310	0	0.0198707	5.1615	0.0244104	up	AT4G31940	cytochrome P450, family 82, subfamily C, polypeptide 4
Ghir_A05G020490	0.793061	0.252418	-1.45935	0.0411199	down	AT5G42680	Protein of unknown function, DUF617
Ghir_A05G020550	0	0.155991	8.41372	0.000269603	up	AT2G26540	uroporphyrinogen-III synthase family protein
Ghir_A05G020600	0.232212	0	-6.36209	0.000154393	down
Ghir_A05G020680	0.508378	0.00444367	-6.61334	0.00197545	down	AT4G33360	NAD(P)-binding Rossmann-fold superfamily protein
Ghir_A05G021150	7.15811	1.69743	-1.89245	0.0385517	down	AT5G67260	CYCLIN D3;2
Ghir_A05G021440	0.204245	0.0567373	-1.53865	0.0143645	down	AT1G70210	CYCLIN D1;1
Ghir_A05G021970	535.048	84.7183	-2.49863	0.0397946	down	AT1G50010	tubulin alpha-2 chain
Ghir_A05G022080	0.252561	0	-8.3995	0.00419835	down	AT1G58290	Glutamyl-tRNA reductase family protein
Ghir_A05G022090	0.971368	0.26346	-1.68352	0.0235467	down	AT5G49665	Zinc finger (C3HC4-type RING finger) family protein
Ghir_A05G022190	0.0544495	0	-5.77374	0.0199364	down	AT5G64410	oligopeptide transporter 4
Ghir_A05G022320	0.0712305	0	-5.44719	0.00475489	down	AT1G07840	Sas10/Utp3/C1D family
Ghir_A05G022490	5.01161	0.253248	-4.10309	0.0105823	down	AT1G09750	Eukaryotic aspartyl protease family protein
Ghir_A05G022610	0.0209975	0.382911	4.31494	0.0190335	up	AT5G10940	transducin family protein / WD-40 repeat family protein
Ghir_A05G022620	0.371104	0.032222	-3.09237	0.00242838	down	AT1G02070	unknown protein; BEST Arabidopsis thaliana protein match is: unknown protein (TAIR:AT3G60520.1); Has 98 Blast hits to 98 proteins in 13 species: Archae - 0; Bacteria - 0; Metazoa - 0; Fungi - 0; Plants - 98; Viruses - 0; Other Eukaryotes - 0 (source: NCBI BLink).
Ghir_A05G022630	0	0.272143	8.50392	0.0266162	up	AT4G24660	homeobox protein 22
Ghir_A05G023810	0.0038305	0.267526	5.95458	0.00465684	up	AT1G77680	Ribonuclease II/R family protein
Ghir_A05G024020	0	0.0454393	6.80632	0.0107956	up	AT3G05270	Plant protein of unknown function (DUF869)
Ghir_A05G024110	0.760071	0.000431667	-9.18687	0.00154236	down	AT1G21740	Protein of unknown function (DUF630 and DUF632)
Ghir_A05G024210	2.71959	0.170349	-3.71782	0.0076874	down	AT1G21710	8-oxoguanine-DNA glycosylase 1
Ghir_A05G024270	1.8841	0.556599	-1.5384	0.0401192	down	AT1G77380	amino acid permease 3
Ghir_A05G024640	0.573194	0	-8.57699	4.35786e-07	down	AT1G17950	myb domain protein 52
Ghir_A05G025790	1.15404	0.32965	-1.59903	0.00899536	down	AT5G50160	ferric reduction oxidase 8
Ghir_A05G026200	0.0327345	0	-4.31399	0.0415979	down	AT5G66440	unknown protein; BEST Arabidopsis thaliana protein match is: unknown protein (TAIR:AT4G34560.1); Has 1807 Blast hits to 1807 proteins in 277 species: Archae - 0; Bacteria - 0; Metazoa - 736; Fungi - 347; Plants - 385; Viruses - 0; Other Eukaryotes - 339 (source: NCBI BLink).
Ghir_A05G026690	0.0155365	0	-4.39764	0.02574	down	AT2G19130	S-locus lectin protein kinase family protein
Ghir_A05G027100	0	0.202372	8.79116	0.00209004	up	AT1G22460	O-fucosyltransferase family protein
Ghir_A05G027330	0	0.682988	22.8035	3.77276e-18	up	AT1G36990	unknown protein; LOCATED IN: chloroplast; EXPRESSED IN: 24 plant structures; EXPRESSED DURING: 14 growth stages; BEST Arabidopsis thaliana protein match is: unknown protein (TAIR:AT4G08510.1); Has 5029 Blast hits to 1779 proteins in 339 species: Archae - 2; Bacteria - 1372; Metazoa - 990; Fungi - 933; Plants - 111; Viruses - 28; Other Eukaryotes - 1593 (source: NCBI BLink).
Ghir_A05G027580	0.205674	0.55628	1.64044	0.00794365	up	AT1G74450	Protein of unknown function (DUF793)
Ghir_A05G027850	11.3686	23.8345	1.25602	0.00244955	up	AT4G09160	SEC14 cytosolic factor family protein / phosphoglyceride transfer family protein
Ghir_A05G028000	0.583557	0	-8.37124	0.0236611	down	AT5G36970	NDR1/HIN1-like 25
Ghir_A05G028230	0.092983	0	-6.08773	0.000128506	down	AT2G39970	Mitochondrial substrate carrier family protein
Ghir_A05G028240	1.23464	0	-10.0638	2.68456e-06	down	AT3G54190	Transducin/WD40 repeat-like superfamily protein
Ghir_A05G028320	1.17977	0.303631	-1.72664	0.0453793	down	AT3G10870	methyl esterase 17
Ghir_A05G028400	4.39315	8.4181	1.13905	0.0428026	up	AT2G40610	expansin A8
Ghir_A05G028410	0	0.224083	7.58543	0.0244412	up	AT2G40620	Basic-leucine zipper (bZIP) transcription factor family protein
Ghir_A05G028420	1.19115	0.130785	-3.00701	0.00788816	down	AT3G56360	unknown protein; FUNCTIONS IN: molecular_function unknown; INVOLVED IN: biological_process unknown; LOCATED IN: chloroplast; EXPRESSED IN: 24 plant structures; EXPRESSED DURING: 15 growth stages; BEST Arabidopsis thaliana protein match is: unknown protein (TAIR:AT5G05250.1); Has 45 Blast hits to 45 proteins in 13 species: Archae - 0; Bacteria - 0; Metazoa - 0; Fungi - 0; Plants - 45; Viruses - 0;…
Ghir_A05G028430	0.0832585	0	-6.33624	0.0251707	down	AT5G05240	Uncharacterised conserved protein (UCP030365)
Ghir_A05G028660	0.235295	0.006673	-4.76398	0.00430121	down	AT3G54500	BEST Arabidopsis thaliana protein match is: dentin sialophosphoprotein-related (TAIR:AT5G64170.1); Has 183 Blast hits to 175 proteins in 44 species: Archae - 0; Bacteria - 4; Metazoa - 38; Fungi - 11; Plants - 120; Viruses - 0; Other Eukaryotes - 10 (source: NCBI BLink).
Ghir_A05G028800	0.131731	0.0196823	-2.53513	0.00220486	down	AT3G07960	Phosphatidylinositol-4-phosphate 5-kinase family protein
Ghir_A05G028820	0.84536	0.213439	-1.74323	0.0378759	down	AT3G54400	Eukaryotic aspartyl protease family protein
Ghir_A05G029010	0.111624	0.7198	2.7867	0.0430149	up
Ghir_A05G029090	2.0036	0.41973	-2.03442	0.0428775	down	AT3G56850	ABA-responsive element binding protein 3
Ghir_A05G029100	3.84858	1.21019	-1.45538	0.0373575	down	AT1G73100	SU(VAR)3-9 homolog 3
Ghir_A05G029480	0.097206	0	-5.44214	0.0211297	down
Ghir_A05G029650	1.11418	0.126122	-2.96441	0.0310431	down	AT5G04500	glycosyltransferase family protein 47
Ghir_A05G029670	0.321847	1.59624	2.51348	4.0542e-05	up	AT5G04480	UDP-Glycosyltransferase superfamily protein
Ghir_A05G029950	0.100151	0	-6.62177	2.00213e-05	down	AT1G65550	Xanthine/uracil permease family protein
Ghir_A05G030860	0.887448	0.149603	-2.24679	6.0951e-06	down	AT1G65520	delta(3), delta(2)-enoyl CoA isomerase 1
Ghir_A05G030940	0.590596	0	-8.92339	7.3185e-09	down	AT2G39670	Radical SAM superfamily protein
Ghir_A05G031010	0.070324	1.38847	4.4257	2.36666e-06	up	AT5G05970	Transducin/WD40 repeat-like superfamily protein
Ghir_A05G031180	0.051978	0	-4.72788	0.0274307	down	AT3G55770	GATA type zinc finger transcription factor family protein
Ghir_A05G031640	2.0402	0.833573	-1.07561	0.0297774	down	AT3G25560	NSP-interacting kinase 2
Ghir_A05G031800	0.0773755	0	-6.10282	0.000125085	down	AT2G01940	C2H2-like zinc finger protein
Ghir_A05G032160	0.279895	0	-22.2109	0.000677051	down	AT1G67590	Remorin family protein
Ghir_A05G032360	1.58905	0.001918	-8.19539	0.00173342	down	AT1G10740	alpha/beta-Hydrolases superfamily protein
Ghir_A05G032380	0.131933	0.007889	-3.77791	0.0067268	down	AT3G26610	Pectin lyase-like superfamily protein
Ghir_A05G032970	0.696244	0	-24.4252	0.00203912	down	AT3G23670	phragmoplast-associated kinesin-related protein, putative
Ghir_A05G033150	1.01758	0.159664	-2.3867	1.0687e-05	down	AT1G27060	Regulator of chromosome condensation (RCC1) family protein
Ghir_A05G033910	0.682421	3.72112	2.63187	6.40867e-06	up	AT1G15140	FAD/NAD(P)-binding oxidoreductase
Ghir_A05G034160	0.510868	0.089551	-2.30085	0.000205491	down	AT2G40095	Alpha/beta hydrolase related protein
Ghir_A05G034520	0.163959	0.611989	2.07089	3.35414e-07	up	AT3G15750	Essential protein Yae1, N-terminal
Ghir_A05G034730	0.450267	0.04036	-3.16874	0.00268145	down	AT2G33500	B-box type zinc finger protein with CCT domain
Ghir_A05G034860	0.530457	0.163997	-1.47209	0.00465907	down	AT3G27010	TEOSINTE BRANCHED 1, cycloidea, PCF (TCP)-domain family protein 20
Ghir_A05G035210	0.501441	0	-9.02777	0.000755767	down	AT5G14230	CONTAINS InterPro DOMAIN/s: Ankyrin repeat-containing domain (InterPro:IPR020683), Ankyrin repeat (InterPro:IPR002110); BEST Arabidopsis thaliana protein match is: XB3 ortholog 2 in Arabidopsis thaliana (TAIR:AT5G57740.1); Has 66374 Blast hits to 25358 proteins in 1201 species: Archae - 121; Bacteria - 8133; Metazoa - 29530; Fungi - 5885; Plants - 3349; Viruses - 785; Other Eukaryotes - 18571 (so…
Ghir_A05G035520	0.0770855	0.440243	2.74334	0.00105729	up	AT3G12620	Protein phosphatase 2C family protein
Ghir_A05G035950	0.764397	0.0350597	-4.10252	0.00730998	down	AT1G36280	L-Aspartase-like family protein
Ghir_A05G036010	5.29585	1.15296	-1.99806	0.005252	down	AT3G11340	UDP-Glycosyltransferase superfamily protein
Ghir_A05G036520	2.40582	0	-12.0992	2.57369e-14	down	AT3G55320	P-glycoprotein 20
Ghir_A05G036570	0	0.0531397	7.33488	0.0266943	up	AT3G55270	mitogen-activated protein kinase phosphatase 1
Ghir_A05G036640	0	0.419551	21.3925	4.32994e-12	up	AT5G13560	unknown protein; BEST Arabidopsis thaliana protein match is: unknown protein (TAIR:AT2G37370.1); Has 12055 Blast hits to 8846 proteins in 811 species: Archae - 217; Bacteria - 1046; Metazoa - 6104; Fungi - 1115; Plants - 528; Viruses - 14; Other Eukaryotes - 3031 (source: NCBI BLink).
Ghir_A05G036700	0.017107	0	-3.88007	0.03801	down	AT3G55080	SET domain-containing protein
Ghir_A05G036820	12.5556	1.47366	-2.88667	0.0479444	down	AT5G40580	20S proteasome beta subunit PBB2
Ghir_A05G036860	0.0444205	0	-4.39365	0.0447819	down	AT3G27460	SGF29 tudor-like domain
Ghir_A05G036880	1.66558	0.532967	-1.40675	0.0329469	down	AT5G14460	Pseudouridine synthase family protein
Ghir_A05G037450	1.00342	0.00524233	-7.31055	0.0334947	down	AT5G14940	Major facilitator superfamily protein
Ghir_A05G037490	0	0.643155	10.525	6.71493e-05	up	AT5G62910	RING/U-box superfamily protein
Ghir_A05G037730	4.03026	1.18878	-1.57748	0.0482557	down	AT5G15140	Galactose mutarotase-like superfamily protein
Ghir_A05G037810	11.3478	34.1047	1.76198	0.0475966	up	AT4G31130	Protein of unknown function (DUF1218)
Ghir_A05G037870	2.62007	0.889641	-1.36039	0.0298157	down	AT5G15210	homeobox protein 30
Ghir_A05G037980	0.281411	0	-8.23806	0.0173697	down	AT3G01170	Ribosomal protein L34e superfamily protein
Ghir_A05G038150	0.365065	0.102636	-1.51575	0.00656883	down	AT3G29230	Tetratricopeptide repeat (TPR)-like superfamily protein
Ghir_A05G038330	0.533547	0	-8.14142	2.66366e-06	down	AT5G15510	TPX2 (targeting protein for Xklp2) protein family
Ghir_A05G038730	0.152288	0.964051	2.89931	0.0227756	up	AT5G08500	Transmembrane CLPTM1 family protein
Ghir_A05G038790	0.165225	0	-21.1587	0.000125085	down	AT4G24290	MAC/Perforin domain-containing protein
Ghir_A05G038900	0.0535825	0	-5.5916	0.0293648	down	AT4G18880	heat shock transcription factor A4A
Ghir_A05G039230	1.04327	0.298268	-1.57573	0.0325535	down	AT1G06490	glucan synthase-like 7
Ghir_A05G039510	0.267674	0	-28.3052	0.000206142	down	AT5G08750	RING/FYVE/PHD zinc finger superfamily protein
Ghir_A05G039550	1.25059	0.525642	-1.03268	0.0107124	down	AT5G39450	F-box family protein
Ghir_A05G039960	0.568172	0.125595	-1.94917	0.00222266	down	AT5G60900	receptor-like protein kinase 1
Ghir_A05G040130	0	0.190237	6.78598	0.00647353	up	AT1G49230	RING/U-box superfamily protein
Ghir_A05G040360	1.62201	0.430985	-1.70373	0.0311322	down	AT3G02800	Tyrosine phosphatase family protein
Ghir_A05G040510	0.47132	0	-8.66153	0.000647604	down	AT5G04190	phytochrome kinase substrate 4
Ghir_A05G040610	0.065996	0	-5.07323	0.0191477	down
Ghir_A05G040990	0.127839	0	-6.69304	0.017561	down	AT5G52070	Agenet domain-containing protein
Ghir_A05G041220	4.86217	1.38386	-1.59878	0.0246059	down	AT3G54390	sequence-specific DNA binding transcription factors
Ghir_A05G041390	0.217715	0	-7.12734	0.000195552	down	AT3G56230	BTB/POZ domain-containing protein
Ghir_A05G041410	0.331524	0.0240873	-3.595	0.0166279	down	AT5G05340	Peroxidase superfamily protein
Ghir_A05G041430	4.61422	1.68126	-1.25335	0.000662989	down	AT2G40475	unknown protein; BEST Arabidopsis thaliana protein match is: unknown protein (TAIR:AT3G56260.2); Has 477 Blast hits to 219 proteins in 41 species: Archae - 0; Bacteria - 4; Metazoa - 91; Fungi - 61; Plants - 144; Viruses - 0; Other Eukaryotes - 177 (source: NCBI BLink).
Ghir_A05G041480	0.203795	0	-7.44268	0.0296428	down	AT1G61670	Lung seven transmembrane receptor family protein
Ghir_A05G041500	0	0.168313	7.75975	0.00566252	up	AT2G40690	NAD-dependent glycerol-3-phosphate dehydrogenase family protein
Ghir_A05G041540	0.401869	0	-22.7291	2.17155e-14	down	AT5G05240	Uncharacterised conserved protein (UCP030365)
Ghir_A05G041660	0.481527	0.00246733	-6.70206	0.00220621	down	AT5G05190	Protein of unknown function (DUF3133)
Ghir_A05G041840	0.184621	0	-6.70771	0.00501672	down	AT3G13970	Ubiquitin-like superfamily protein
Ghir_A05G041880	1.53868	0.263307	-2.33191	0.00763789	down	AT3G14000	DZC (Disease resistance/zinc finger/chromosome condensation-like region) domain containing protein
Ghir_A05G042330	0.0020935	1.57552	7.53109	0.00173136	up	AT2G31305	inhibitor-3
Ghir_A05G042420	1.26229	0	-24.1922	4.51268e-28	down	AT1G60900	U2 snRNP auxilliary factor, large subunit, splicing factor
Ghir_A05G042450	0	0.300105	47.9543	3.98295e-16	up	AT5G04250	Cysteine proteinases superfamily protein
Ghir_A05G042520	0.512792	0.0277287	-3.90112	0.0169155	down	AT2G27490	dephospho-CoA kinase family
Ghir_A05G042630	0.03381	0	-5.17134	0.0275373	down	AT5G53130	cyclic nucleotide gated channel 1
Ghir_A05G042660	0.0335715	0	-5.09515	0.00877381	down	AT5G38280	PR5-like receptor kinase
Ghir_A05G042780	7.83272	0.503363	-3.73678	0.0302341	down	AT1G70140	formin 8
Ghir_A05G042810	0.0066485	0.37401	5.85246	0.00929194	up	AT5G54130	Calcium-binding endonuclease/exonuclease/phosphatase family
Ghir_A05G042830	0.0637055	0.584579	3.40222	0.00144806	up
Ghir_A05G043220	1.7278	49.742	5.04419	0.0203743	up	AT1G20330	sterol methyltransferase 2
Ghir_A05G043340	0.051247	0	-5.3055	0.00178172	down	AT1G70230	TRICHOME BIREFRINGENCE-LIKE 27
Ghir_A05G043510	0.135021	0.007696	-3.59003	0.0011533	down	AT5G41040	HXXXD-type acyl-transferase family protein
Ghir_A06G000120	0.0033845	0.392532	6.38853	0.0299887	up	AT5G42200	RING/U-box superfamily protein
Ghir_A06G000140	12.2757	1.13858	-3.22673	0.000304814	down	AT1G20225	Thioredoxin superfamily protein
Ghir_A06G000230	0.855698	0.190594	-1.9431	1.31379e-05	down	AT1G27940	P-glycoprotein 13
Ghir_A06G000420	0.0602965	0	-4.79604	0.0248341	down	AT1G75720	Plant protein of unknown function (DUF827)
Ghir_A06G000870	0.221341	0.020606	-3.00967	0.0436983	down
Ghir_A06G001030	0	0.245482	8.45694	0.00194095	up	AT3G50700	indeterminate(id)-domain 2
Ghir_A06G001430	0.70379	0.15296	-1.96824	0.0118347	down	AT1G47670	Transmembrane amino acid transporter family protein
Ghir_A06G001490	0.226309	0.00735533	-4.27843	0.0200081	down	AT5G67300	myb domain protein r1
Ghir_A06G001520	0	0.146423	7.28283	7.66523e-05	up
Ghir_A06G001540	0.112475	0	-4.72053	0.0111529	down	AT5G66816	unknown protein; FUNCTIONS IN: molecular_function unknown; INVOLVED IN: biological_process unknown; LOCATED IN: endomembrane system; BEST Arabidopsis thaliana protein match is: unknown protein (TAIR:AT3G50610.1); Has 30201 Blast hits to 17322 proteins in 780 species: Archae - 12; Bacteria - 1396; Metazoa - 17338; Fungi - 3422; Plants - 5037; Viruses - 0; Other Eukaryotes - 2996 (source: NCBI BLin…
Ghir_A06G001760	3.38077	1.31801	-1.1246	0.0187225	down	AT5G09890	Protein kinase family protein
Ghir_A06G001990	0.229793	0	-6.86508	0.00540898	down	AT5G47820	P-loop containing nucleoside triphosphate hydrolases superfamily protein
Ghir_A06G002190	5.17932	0.895809	-2.30598	5.50098e-11	down	AT3G19540	Protein of unknown function (DUF620)
Ghir_A06G002290	0.632499	0	-7.70483	6.88673e-06	down	AT1G27730	salt tolerance zinc finger
Ghir_A06G002770	0	0.0665213	6.92884	0.00498538	up	AT1G58340	MATE efflux family protein
Ghir_A06G002800	0.056932	0.012564	-2.20768	0.0126325	down	AT3G14470	NB-ARC domain-containing disease resistance protein
Ghir_A06G002930	0.02805	0	-4.61455	0.0284332	down	AT2G22070	pentatricopeptide (PPR) repeat-containing protein
Ghir_A06G002960	0.0100725	0.238168	4.73995	0.0186142	up	AT3G57230	AGAMOUS-like 16
Ghir_A06G003010	0.833624	0	-8.83506	3.03178e-09	down	AT1G74520	HVA22 homologue A
Ghir_A06G003050	0.189444	0.00567633	-4.2441	0.000245591	down	AT5G49690	UDP-Glycosyltransferase superfamily protein
Ghir_A06G003070	2.09798	0.309474	-2.56191	0.000101509	down	AT4G24480	Protein kinase superfamily protein
Ghir_A06G003220	12.6747	47.0031	2.10275	0.00278119	up	AT1G09740	Adenine nucleotide alpha hydrolases-like superfamily protein
Ghir_A06G003320	0.42947	0.100887	-1.8728	0.00242838	down	AT4G24660	homeobox protein 22
Ghir_A06G003380	0.122675	0	-6.21036	0.0088182	down
Ghir_A06G003490	7.0651	0.116725	-5.69769	0.00208292	down	AT1G22460	O-fucosyltransferase family protein
Ghir_A06G003540	0.707377	0.111393	-2.4676	0.00587029	down	AT1G22430	GroES-like zinc-binding dehydrogenase family protein
Ghir_A06G003810	2.87924	0.981158	-1.34361	0.00816162	down	AT1G78110	unknown protein; FUNCTIONS IN: molecular_function unknown; INVOLVED IN: biological_process unknown; LOCATED IN: plasma membrane; EXPRESSED IN: 17 plant structures; EXPRESSED DURING: 7 growth stages; BEST Arabidopsis thaliana protein match is: unknown protein (TAIR:AT1G22230.1); Has 5452 Blast hits to 3541 proteins in 289 species: Archae - 4; Bacteria - 165; Metazoa - 1756; Fungi - 532; Plants - 2…
Ghir_A06G004130	0.848703	3.35718	2.15008	0.0429704	up
Ghir_A06G004410	0	0.069752	20.2732	3.98474e-06	up	AT2G41705	camphor resistance CrcB family protein
Ghir_A06G004560	1.30365	0.484066	-1.20068	0.00918689	down	AT1G77620	P-loop containing nucleoside triphosphate hydrolases superfamily protein
Ghir_A06G004810	0.117461	0	-5.32766	0.0292461	down	AT3G47180	RING/U-box superfamily protein
Ghir_A06G004970	6.551	13.4549	1.21261	0.0219069	up	AT5G11440	CTC-interacting domain 5
Ghir_A06G005040	0.0971825	1.43299	4.11012	0.000404961	up	AT2G25680	molybdate transporter 1
Ghir_A06G005280	0.088891	0.941399	3.58798	0.00350448	up	AT5G25270	Ubiquitin-like superfamily protein
Ghir_A06G005550	18.3899	32.0868	1.01218	0.00483432	up	AT5G20260	Exostosin family protein
Ghir_A06G005830	0	0.00103533	16.2242	0.000306447	up	AT5G62960	unknown protein; BEST Arabidopsis thaliana protein match is: unknown protein (TAIR:AT1G10660.1); Has 35333 Blast hits to 34131 proteins in 2444 species: Archae - 798; Bacteria - 22429; Metazoa - 974; Fungi - 991; Plants - 531; Viruses - 0; Other Eukaryotes - 9610 (source: NCBI BLink).
Ghir_A06G006300	0.571962	0	-9.13195	4.91658e-10	down	AT5G25510	Protein phosphatase 2A regulatory B subunit family protein
Ghir_A06G006910	0.093872	0	-5.96353	0.00637416	down	AT5G11590	Integrase-type DNA-binding superfamily protein
Ghir_A06G006980	0	0.428472	10.0028	0.000267323	up	AT2G19950	golgin candidate 1
Ghir_A06G007040	0.46457	0.0826877	-2.23243	0.00133754	down	AT3G28345	ABC transporter family protein
Ghir_A06G007090	0.131033	0	-7.24293	1.78357e-06	down
Ghir_A06G007100	0.881669	0.090165	-3.03586	0.0368536	down	AT4G29140	MATE efflux family protein
Ghir_A06G007340	1.17436	3.94713	1.95452	0.00194095	up	AT1G17800	early nodulin-like protein 22
Ghir_A06G007420	0.037707	1.71889	5.69111	0.0274014	up	AT4G29510	arginine methyltransferase 11
Ghir_A06G007700	0.823393	0	-8.82226	3.93583e-09	down	AT2G19490	recA DNA recombination family protein
Ghir_A06G008070	20.2422	7.51934	-1.22977	6.53481e-05	down	AT3G45310	Cysteine proteinases superfamily protein
Ghir_A06G008120	0.118456	0	-5.33639	0.0475545	down	AT5G20635	FUNCTIONS IN: molecular_function unknown; INVOLVED IN: biological_process unknown; LOCATED IN: keratin filament, chloroplast; CONTAINS InterPro DOMAIN/s: Keratin, high sulphur B2 protein (InterPro:IPR002494); Has 6153 Blast hits to 2882 proteins in 265 species: Archae - 6; Bacteria - 47; Metazoa - 4777; Fungi - 68; Plants - 187; Viruses - 30; Other Eukaryotes - 1038 (source: NCBI BLink).
Ghir_A06G008150	1.45881	0.221357	-2.42484	0.0499636	down	AT5G20670	Protein of unknown function (DUF1677)
Ghir_A06G008420	0.053547	0	-5.351	0.00207847	down	AT4G05450	mitochondrial ferredoxin 1
Ghir_A06G008490	0.0452935	0	-5.27257	0.0266444	down	AT3G43860	glycosyl hydrolase 9A4
Ghir_A06G008510	40.9775	91.7835	1.38094	0.00265197	up	AT4G33180	alpha/beta-Hydrolases superfamily protein
Ghir_A06G008640	0.19529	0.0214143	-2.79088	6.25967e-05	down	AT5G21280	hydroxyproline-rich glycoprotein family protein
Ghir_A06G008770	5.77108	1.61893	-1.64122	1.38617e-07	down	AT5G19530	S-adenosyl-L-methionine-dependent methyltransferases superfamily protein
Ghir_A06G008940	1.70625	0.542393	-1.43088	0.0132011	down	AT5G20850	RAS associated with diabetes protein 51
Ghir_A06G009130	1.02076	10.042	3.43678	0.00247429	up	AT3G13920	eukaryotic translation initiation factor 4A1
Ghir_A06G009210	2.73464	0.0267137	-6.44097	0.0069803	down	AT3G13790	Glycosyl hydrolases family 32 protein
Ghir_A06G009220	0.412305	0.0499803	-2.7598	0.000762371	down	AT1G55110	indeterminate(id)-domain 7
Ghir_A06G009450	0.0091005	0.201624	4.32183	0.0198888	up	AT2G25950	Protein of unknown function (DUF1000)
Ghir_A06G009870	1.63926	0	-10.3847	4.24811e-08	down	AT1G67280	Glyoxalase/Bleomycin resistance protein/Dioxygenase superfamily protein
Ghir_A06G009890	2.22806	0	-11.1507	7.62137e-06	down	AT4G29000	Tesmin/TSO1-like CXC domain-containing protein
Ghir_A06G009910	1.73334	0	-10.4462	2.33355e-06	down	AT5G25760	peroxin4
Ghir_A06G009960	0	0.38229	9.4432	0.0311225	up	AT5G57850	D-aminoacid aminotransferase-like PLP-dependent enzymes superfamily protein
Ghir_A06G010050	3.48908	0.497566	-2.60964	0.00794365	down	AT4G32710	Protein kinase superfamily protein
Ghir_A06G010130	0.504419	0.101675	-2.09168	0.0169824	down	AT5G51350	Leucine-rich repeat transmembrane protein kinase family protein
Ghir_A06G010240	2.33132	0.439264	-2.20181	0.000186711	down	AT2G24260	LJRHL1-like 1
Ghir_A06G010250	20.2323	8.17757	-1.10479	1.00724e-05	down	AT4G30960	SOS3-interacting protein 3
Ghir_A06G010550	0.0609555	0	-5.49789	0.00329355	down	AT4G32295	unknown protein; BEST Arabidopsis thaliana protein match is: unknown protein (TAIR:AT3G24150.1); Has 39 Blast hits to 39 proteins in 10 species: Archae - 0; Bacteria - 0; Metazoa - 0; Fungi - 0; Plants - 39; Viruses - 0; Other Eukaryotes - 0 (source: NCBI BLink).
Ghir_A06G010640	1.55455	0	-24.4632	9.22516e-10	down	AT5G34850	purple acid phosphatase 26
Ghir_A06G010870	0.521793	0	-8.69736	5.61476e-09	down	AT1G80840	WRKY DNA-binding protein 40
Ghir_A06G011180	0.692044	0.0429097	-3.74493	0.00739345	down	AT4G31730	glutamine dumper 1
Ghir_A06G011250	0.161726	0.035345	-1.61351	0.0237093	down	AT3G42860	zinc knuckle (CCHC-type) family protein
Ghir_A06G011330	0.481672	0.025583	-3.93981	0.000799809	down	AT1G13680	PLC-like phosphodiesterases superfamily protein
Ghir_A06G011460	0.246433	0	-6.95188	0.00488901	down	AT1G78915	Tetratricopeptide repeat (TPR)-like superfamily protein
Ghir_A06G011610	0.433752	0.0284383	-3.66959	0.00988513	down	AT1G15290	Tetratricopeptide repeat (TPR)-like superfamily protein
Ghir_A06G011660	5.44235	0	-24.0227	2.38548e-21	down	AT2G02470	alfin-like 6
Ghir_A06G011900	1.2252	0.176492	-2.5602	0.0215221	down	AT1G48310	chromatin remodeling factor18
Ghir_A06G012100	0.018722	0.1246	2.71602	0.0254929	up	AT1G22750	unknown protein; FUNCTIONS IN: molecular_function unknown; INVOLVED IN: biological_process unknown; LOCATED IN: vacuole; EXPRESSED IN: 23 plant structures; EXPRESSED DURING: 15 growth stages; CONTAINS InterPro DOMAIN/s: Protein of unknown function DUF1475 (InterPro:IPR009943); Has 185 Blast hits to 155 proteins in 21 species: Archae - 0; Bacteria - 8; Metazoa - 3; Fungi - 0; Plants - 64; Viruses …
Ghir_A06G012620	0.182693	0.011088	-3.51947	0.0171152	down	AT1G71230	COP9-signalosome 5B
Ghir_A06G012760	8.44895	2.53991	-1.52339	0.0270417	down	AT2G24580	FAD-dependent oxidoreductase family protein
Ghir_A06G013330	1.07235	0.124912	-2.90749	0.00865613	down	AT1G28280	VQ motif-containing protein
Ghir_A06G013390	0.563746	1.21103	1.31112	0.0379796	up	AT4G18910	NOD26-like intrinsic protein 1;2
Ghir_A06G013430	0	0.104207	8.12451	0.00775952	up	AT1G53430	Leucine-rich repeat transmembrane protein kinase
Ghir_A06G014040	2.12618	0.805617	-1.17835	0.0144429	down	AT1G28240	Protein of unknown function (DUF616)
Ghir_A06G014660	0	0.476717	9.22997	0.000493237	up	AT5G46410	SCP1-like small phosphatase 4
Ghir_A06G014680	0.0781105	30.035	8.76552	0.00717305	up	AT1G29790	S-adenosyl-L-methionine-dependent methyltransferases superfamily protein
Ghir_A06G014980	0	2.38582	25.7573	1.43338e-08	up	AT5G46180	ornithine-delta-aminotransferase
Ghir_A06G015060	0.912895	2.90625	1.84344	0.00498448	up	AT2G20490	nucleolar RNA-binding Nop10p family protein
Ghir_A06G015080	0.116319	3.96507	5.32772	0.0475674	up	AT1G30270	CBL-interacting protein kinase 23
Ghir_A06G015170	0	0.072281	6.71956	0.0109907	up	AT5G45160	Root hair defective 3 GTP-binding protein (RHD3)
Ghir_A06G015500	0.772554	0	-23.9658	3.54689e-09	down	AT3G14075	Mono-/di-acylglycerol lipase, N-terminal;Lipase, class 3
Ghir_A06G015550	0	0.0362887	5.40926	0.04829	up
Ghir_A06G015850	0.143098	0.046013	-1.32593	0.030496	down	AT1G61800	glucose-6-phosphate/phosphate translocator 2
Ghir_A06G016000	0.335264	0	-8.74313	0.0169155	down	AT1G11710	Pentatricopeptide repeat (PPR) superfamily protein
Ghir_A06G016140	0.312125	0.014208	-4.03139	0.000221194	down	AT5G64840	general control non-repressible 5
Ghir_A06G016270	1.17595	0.325032	-1.61541	0.00124178	down	AT4G04350	tRNA synthetase class I (I, L, M and V) family protein
Ghir_A06G016490	0.101969	0	-5.87754	0.000193347	down	AT1G62400	Protein kinase superfamily protein
Ghir_A06G016730	0.175125	0	-5.50574	0.0050382	down	AT4G16447	unknown protein; Has 30201 Blast hits to 17322 proteins in 780 species: Archae - 12; Bacteria - 1396; Metazoa - 17338; Fungi - 3422; Plants - 5037; Viruses - 0; Other Eukaryotes - 2996 (source: NCBI BLink).
Ghir_A06G016780	0.063349	0	-5.03749	0.00521443	down	AT4G16410	unknown protein; CONTAINS InterPro DOMAIN/s: Protein of unknown function DUF751 (InterPro:IPR008470); Has 30201 Blast hits to 17322 proteins in 780 species: Archae - 12; Bacteria - 1396; Metazoa - 17338; Fungi - 3422; Plants - 5037; Viruses - 0; Other Eukaryotes - 2996 (source: NCBI BLink).
Ghir_A06G016800	0.72548	0.0588803	-3.60825	0.0415684	down	AT3G13130	unknown protein; FUNCTIONS IN: molecular_function unknown; INVOLVED IN: biological_process unknown; LOCATED IN: endomembrane system; EXPRESSED IN: male gametophyte; Has 140 Blast hits to 132 proteins in 41 species: Archae - 2; Bacteria - 4; Metazoa - 29; Fungi - 20; Plants - 51; Viruses - 0; Other Eukaryotes - 34 (source: NCBI BLink).
Ghir_A06G017030	10.0575	3.10555	-1.49677	0.0279244	down	AT3G51950	Zinc finger (CCCH-type) family protein / RNA recognition motif (RRM)-containing protein
Ghir_A06G017130	1.84733	0.059958	-4.75515	0.00721963	down	AT3G56200	Transmembrane amino acid transporter family protein
Ghir_A06G017270	2.06289	0.31103	-2.51279	0.0124399	down	AT3G51740	inflorescence meristem receptor-like kinase 2
Ghir_A06G017660	19.5467	7.08922	-1.25311	2.62962e-13	down	AT4G00430	plasma membrane intrinsic protein 1;4
Ghir_A06G017750	0.235127	0.882356	2.12278	0.00564405	up	AT3G54000	unknown protein; Has 35333 Blast hits to 34131 proteins in 2444 species: Archae - 798; Bacteria - 22429; Metazoa - 974; Fungi - 991; Plants - 531; Viruses - 0; Other Eukaryotes - 9610 (source: NCBI BLink).
Ghir_A06G018140	0.0438025	0.94701	4.72065	0.0260574	up	AT3G52260	Pseudouridine synthase family protein
Ghir_A06G018210	0.580144	0.0617323	-2.91898	0.0466535	down	AT2G35800	mitochondrial substrate carrier family protein
Ghir_A06G018620	3.03321	0.760514	-1.76465	0.0180821	down	AT3G03770	Leucine-rich repeat protein kinase family protein
Ghir_A06G018650	0.21886	0.0196847	-3.14234	0.0229176	down	AT3G10660	calmodulin-domain protein kinase cdpk isoform 2
Ghir_A06G018840	0.778248	0	-9.64446	0.00068342	down	AT5G04980	DNAse I-like superfamily protein
Ghir_A06G019250	0.13437	0	-6.92562	0.000221194	down	AT2G40460	Major facilitator superfamily protein
Ghir_A06G019330	3.1504	0.978974	-1.47108	0.00674399	down	AT3G56370	Leucine-rich repeat protein kinase family protein
Ghir_A06G019350	0.129726	0	-5.8064	0.00104247	down	AT3G10910	RING/U-box superfamily protein
Ghir_A06G019580	0.179479	0	-30.978	5.45744e-07	down	AT1G30620	NAD(P)-binding Rossmann-fold superfamily protein
Ghir_A06G019630	0	2.17737	11.4338	0.016386	up	AT2G34770	fatty acid hydroxylase 1
Ghir_A06G019640	0.676797	0	-8.98655	0.00746591	down	AT4G20840	FAD-binding Berberine family protein
Ghir_A06G019700	0.337722	0	-8.27009	0.000683031	down	AT4G33270	Transducin family protein / WD-40 repeat family protein
Ghir_A06G019760	1.25193	0.025544	-5.41171	0.00554226	down	AT5G25190	Integrase-type DNA-binding superfamily protein
Ghir_A06G020180	0.613676	0	-24.6853	1.17745e-25	down	AT3G16010	Pentatricopeptide repeat (PPR-like) superfamily protein
Ghir_A06G020200	0	0.173781	9.60509	3.41414e-07	up	AT1G79950	RAD3-like DNA-binding helicase protein
Ghir_A06G020350	0.516026	0	-8.60501	4.44638e-09	down	AT4G12540	unknown protein; Has 29 Blast hits to 26 proteins in 11 species: Archae - 2; Bacteria - 0; Metazoa - 0; Fungi - 0; Plants - 27; Viruses - 0; Other Eukaryotes - 0 (source: NCBI BLink).
Ghir_A06G020440	0.260452	0.0141223	-3.64786	0.00280873	down	AT1G08130	DNA ligase 1
Ghir_A06G020920	1.95534	26.44	3.99836	0.0356888	up	AT1G16180	Serinc-domain containing serine and sphingolipid biosynthesis protein
Ghir_A06G020970	0.162999	0.54683	1.94898	0.00996992	up	AT5G45130	RAB homolog 1
Ghir_A06G021010	0.102466	0	-21.5458	0.00844426	down	AT4G19860	alpha/beta-Hydrolases superfamily protein
Ghir_A06G021330	4.93269	1.89328	-1.16095	0.0169155	down	AT1G78700	BES1/BZR1 homolog 4
Ghir_A06G021350	1.89781	0.532975	-1.61043	0.000994025	down	AT4G18820	AAA-type ATPase family protein
Ghir_A06G021460	0.499576	0	-8.85963	0.00846614	down	AT4G18593	dual specificity protein phosphatase-related
Ghir_A06G021530	5.05858	0.0252813	-7.3969	0.000126986	down	AT2G34040	Apoptosis inhibitory protein 5 (API5)
Ghir_A06G021610	2.0284	0.17386	-3.31607	0.0159653	down	AT1G28420	homeobox-1
Ghir_A06G021710	4.79456	14.5025	1.7872	0.0380028	up	AT1G28270	ralf-like 4
Ghir_A06G021800	0.080059	0	-6.57896	0.00629871	down	AT4G21670	C-terminal domain phosphatase-like 1
Ghir_A06G021830	2.88032	0	-10.2982	2.55184e-06	down	AT1G61150	LisH and RanBPM domains containing protein
Ghir_A06G022170	0.139239	0	-6.59194	0.0214338	down	AT1G11915	unknown protein; FUNCTIONS IN: molecular_function unknown; INVOLVED IN: biological_process unknown; LOCATED IN: endomembrane system; EXPRESSED IN: root; BEST Arabidopsis thaliana protein match is: unknown protein (TAIR:AT3G17350.1); Has 261 Blast hits to 261 proteins in 13 species: Archae - 0; Bacteria - 0; Metazoa - 0; Fungi - 0; Plants - 261; Viruses - 0; Other Eukaryotes - 0 (source: NCBI BLin…
Ghir_A06G022300	10.5448	4.45021	-1.03627	0.0123474	down	AT4G22360	SWIB complex BAF60b domain-containing protein
Ghir_A06G022470	0.799738	0	-22.9603	0.00430428	down	AT5G47750	D6 protein kinase like 2
Ghir_A06G022590	0.350073	0.0548847	-2.5022	0.0237946	down	AT4G20380	LSD1 zinc finger family protein
Ghir_A06G022630	0.063035	0	-5.21104	0.0343979	down	AT4G21160	Calcium-dependent ARF-type GTPase activating protein family
Ghir_A06G022750	0.323991	0	-8.43957	7.98117e-05	down	AT2G16400	BEL1-like homeodomain 7
Ghir_A06G022930	0	0.066468	22.3916	7.06566e-06	up	AT1G61140	SNF2 domain-containing protein / helicase domain-containing protein / zinc finger protein-related
Ghir_A07G000040	1.06423	0.16833	-2.44275	0.0489955	down	AT4G31290	ChaC-like family protein
Ghir_A07G000200	1.3454	5.98136	2.38053	0.0333073	up	AT4G17486	PPPDE putative thiol peptidase family protein
Ghir_A07G000310	0	0.564549	23.8079	1.16072e-22	up	AT4G32600	RING/U-box superfamily protein
Ghir_A07G000350	0.096956	0.979943	3.45451	0.000103156	up	AT3G31430	unknown protein; FUNCTIONS IN: molecular_function unknown; INVOLVED IN: biological_process unknown; LOCATED IN: endomembrane system; BEST Arabidopsis thaliana protein match is: unknown protein (TAIR:AT5G18636.1); Has 295 Blast hits to 291 proteins in 12 species: Archae - 0; Bacteria - 0; Metazoa - 0; Fungi - 0; Plants - 295; Viruses - 0; Other Eukaryotes - 0 (source: NCBI BLink).
Ghir_A07G000470	0	0.202156	8.23399	0.00287384	up	AT4G32360	Pyridine nucleotide-disulphide oxidoreductase family protein
Ghir_A07G000550	0.258632	0	-8.51785	0.00517019	down	AT2G03670	cell division cycle 48B
Ghir_A07G000560	0.293063	4.27e-05	-7.68249	0.0203866	down	AT2G32230	proteinaceous RNase P 1
Ghir_A07G000580	1.16383	0.143304	-2.66387	0.0134217	down	AT3G24630	unknown protein; Has 5348 Blast hits to 3182 proteins in 353 species: Archae - 0; Bacteria - 481; Metazoa - 1959; Fungi - 405; Plants - 180; Viruses - 10; Other Eukaryotes - 2313 (source: NCBI BLink).
Ghir_A07G001120	0.526958	0	-8.19483	2.49627e-05	down	AT2G19590	ACC oxidase 1
Ghir_A07G001380	0	0.172785	22.0688	3.34099e-08	up	AT4G29810	MAP kinase kinase 2
Ghir_A07G001510	0.256148	0.0212497	-3.12368	0.000321542	down	AT2G06255	ELF4-like 3
Ghir_A07G001660	0.67637	0.070963	-2.86103	8.28188e-07	down	AT1G19150	photosystem I light harvesting complex gene 6
Ghir_A07G001710	6.53285	2.4947	-1.17732	0.0179622	down	AT1G19220	auxin response factor 19
Ghir_A07G001980	0.004271	0.136241	4.91264	0.0157878	up	AT2G26310	Chalcone-flavanone isomerase family protein
Ghir_A07G002020	2.10663	0.808797	-1.17443	0.00140402	down	AT2G06040	CONTAINS InterPro DOMAIN/s: Leucine-rich repeat, cysteine-containing subtype (InterPro:IPR006553); BEST Arabidopsis thaliana protein match is: RNI-like superfamily protein (TAIR:AT5G21900.1); Has 5028 Blast hits to 2547 proteins in 240 species: Archae - 0; Bacteria - 125; Metazoa - 2326; Fungi - 765; Plants - 1373; Viruses - 0; Other Eukaryotes - 439 (source: NCBI BLink).
Ghir_A07G002150	0.0833145	0	-5.1504	0.00910978	down	AT5G20510	alfin-like 5
Ghir_A07G002220	0.027238	0	-4.59949	0.0298831	down	AT5G12010	unknown protein; INVOLVED IN: response to salt stress; LOCATED IN: chloroplast, plasma membrane, membrane; EXPRESSED IN: 23 plant structures; EXPRESSED DURING: 13 growth stages; BEST Arabidopsis thaliana protein match is: unknown protein (TAIR:AT4G29780.1); Has 1807 Blast hits to 1807 proteins in 277 species: Archae - 0; Bacteria - 0; Metazoa - 736; Fungi - 347; Plants - 385; Viruses - 0; Other E…
Ghir_A07G002300	0.895683	0.239328	-1.63974	0.00197244	down	AT2G26110	Protein of unknown function (DUF761)
Ghir_A07G002560	0.552629	0	-23.8263	6.19462e-31	down	AT4G32850	nuclear poly(a) polymerase
Ghir_A07G002570	0.391738	0.050926	-2.72597	0.000154298	down	AT5G25930	Protein kinase family protein with leucine-rich repeat domain
Ghir_A07G002590	1.65944	0.51489	-1.4703	0.0088182	down	AT5G25880	NADP-malic enzyme 3
Ghir_A07G002960	0	0.060393	6.30947	0.0265546	up	AT4G19810	Glycosyl hydrolase family protein with chitinase insertion domain
Ghir_A07G003010	0	0.089014	7.80524	0.0441375	up	AT2G25180	response regulator 12
Ghir_A07G003060	0.275278	0.845363	1.81587	0.0232446	up	AT5G58060	SNARE-like superfamily protein
Ghir_A07G003110	0.145043	0	-4.51679	0.0270417	down
Ghir_A07G003170	0.328416	7.49303	4.75558	0.0182095	up	AT4G30920	Cytosol aminopeptidase family protein
Ghir_A07G003320	0.301347	0	-7.86121	2.64086e-08	down	AT4G32295	unknown protein; BEST Arabidopsis thaliana protein match is: unknown protein (TAIR:AT3G24150.1); Has 39 Blast hits to 39 proteins in 10 species: Archae - 0; Bacteria - 0; Metazoa - 0; Fungi - 0; Plants - 39; Viruses - 0; Other Eukaryotes - 0 (source: NCBI BLink).
Ghir_A07G003450	0.557924	0	-24.5175	5.15556e-29	down	AT2G31650	homologue of trithorax
Ghir_A07G003560	0.3737	0.0778367	-1.76776	0.00492299	down	AT5G11000	Plant protein of unknown function (DUF868)
Ghir_A07G003700	0	0.119712	7.29344	0.000830118	up
Ghir_A07G003740	0.086877	0	-6.18175	0.0335413	down	AT2G25080	glutathione peroxidase 1
Ghir_A07G003870	0.070879	0.241572	1.89671	0.0032398	up	AT4G31720	TBP-associated factor II 15
Ghir_A07G003950	0.324966	0.135129	-1.03549	0.0380061	down	AT1G08070	Tetratricopeptide repeat (TPR)-like superfamily protein
Ghir_A07G003970	5.23711	0.861607	-2.38571	0.00245869	down	AT1G15410	aspartate-glutamate racemase family
Ghir_A07G004190	0.100859	0	-5.33112	0.0286513	down	AT3G15810	Protein of unknown function (DUF567)
Ghir_A07G004210	2.02108	0	-10.838	7.69406e-08	down	AT3G33520	actin-related protein 6
Ghir_A07G004420	1.50812	0.612944	-1.1028	0.00736636	down	AT5G51545	low psii accumulation2
Ghir_A07G004810	0.0760285	0	-5.0648	0.0290622	down	AT2G44940	Integrase-type DNA-binding superfamily protein
Ghir_A07G005110	0.0701005	0	-5.21127	0.0297909	down	AT4G33270	Transducin family protein / WD-40 repeat family protein
Ghir_A07G005350	1.96516	0	-36.3365	3.49376e-14	down	AT5G50915	basic helix-loop-helix (bHLH) DNA-binding superfamily protein
Ghir_A07G005380	0.425572	0.0985267	-1.94437	2.83237e-05	down	AT5G50900	ARM repeat superfamily protein
Ghir_A07G005390	6.26582	2.4732	-1.12756	0.00432111	down	AT5G50860	Protein kinase superfamily protein
Ghir_A07G005480	4.0376	1.37619	-1.33083	0.0420921	down	AT3G48710	DEK domain-containing chromatin associated protein
Ghir_A07G005560	0.668939	0.0154257	-4.90856	1.36698e-06	down	AT5G13090	unknown protein; BEST Arabidopsis thaliana protein match is: unknown protein (TAIR:AT1G24270.1); Has 30201 Blast hits to 17322 proteins in 780 species: Archae - 12; Bacteria - 1396; Metazoa - 17338; Fungi - 3422; Plants - 5037; Viruses - 0; Other Eukaryotes - 2996 (source: NCBI BLink).
Ghir_A07G005610	0.123131	0.00229767	-5.02227	0.00467079	down	AT5G50530	CBS / octicosapeptide/Phox/Bemp1 (PB1) domains-containing protein
Ghir_A07G005690	0.0072955	0.299729	5.5014	0.000387111	up	AT4G24900	unknown protein; Has 119 Blast hits to 96 proteins in 40 species: Archae - 0; Bacteria - 0; Metazoa - 81; Fungi - 0; Plants - 34; Viruses - 0; Other Eukaryotes - 4 (source: NCBI BLink).
Ghir_A07G005720	9.27397	3.56919	-1.18821	0.0179622	down	AT3G48530	SNF1-related protein kinase regulatory subunit gamma 1
Ghir_A07G005970	1.01521	0.0386427	-4.44662	0.0401581	down	AT3G48470	embryo defective 2423
Ghir_A07G006350	2.41392	0.135502	-3.93123	0.018949	down	AT1G74000	strictosidine synthase 3
Ghir_A07G006400	0.368838	0.0956537	-1.73452	0.0111464	down	AT4G26090	NB-ARC domain-containing disease resistance protein
Ghir_A07G006640	1.29578	0.459126	-1.27974	0.027665	down	AT5G16560	Homeodomain-like superfamily protein
Ghir_A07G006710	1.10159	0	-8.97666	1.1373e-05	down	AT1G73470	unknown protein; FUNCTIONS IN: molecular_function unknown; INVOLVED IN: biological_process unknown; LOCATED IN: chloroplast; EXPRESSED IN: 22 plant structures; EXPRESSED DURING: 13 growth stages.
Ghir_A07G006720	4.4141	1.84163	-1.05533	0.0110838	down	AT1G73460	Protein kinase superfamily protein
Ghir_A07G006990	0	0.942458	23.8143	1.27554e-09	up	AT5G63050	embryo defective 2759
Ghir_A07G007000	1.46672	0.601031	-1.09113	0.0222924	down	AT1G26850	S-adenosyl-L-methionine-dependent methyltransferases superfamily protein
Ghir_A07G007050	0.546303	0.185445	-1.33523	0.0094981	down	AT5G50130	NAD(P)-binding Rossmann-fold superfamily protein
Ghir_A07G007070	1.96651	0	-25.86	3.93373e-47	down	AT1G74690	IQ-domain 31
Ghir_A07G007160	2.7069	0.796139	-1.53993	0.0221603	down	AT3G01470	homeobox 1
Ghir_A07G007320	0.266151	0	-8.61317	0.000247662	down	AT1G18370	ATP binding microtubule motor family protein
Ghir_A07G007380	4.21557	0.824347	-2.14471	0.0120189	down	AT5G39040	transporter associated with antigen processing protein 2
Ghir_A07G007540	0.10024	0	-5.85788	0.0030998	down	AT3G05010	Protein of unknown function, transmembrane-40
Ghir_A07G007830	0.105669	0.017015	-2.43336	0.0165813	down	AT2G20340	Pyridoxal phosphate (PLP)-dependent transferases superfamily protein
Ghir_A07G008050	22.4665	44.2357	1.18489	0.000226916	up	AT3G03220	expansin A13
Ghir_A07G008080	0	0.133054	6.7403	0.0263173	up	AT5G17220	glutathione S-transferase phi 12
Ghir_A07G008230	0.8183	0.00864633	-5.43885	0.0363514	down	AT2G15050	lipid transfer protein
Ghir_A07G008340	2.27053	0.57749	-1.7491	0.00685097	down	AT3G18080	B-S glucosidase 44
Ghir_A07G008350	0.0625625	0	-6.24019	0.0136761	down	AT3G51500	unknown protein; FUNCTIONS IN: molecular_function unknown; INVOLVED IN: biological_process unknown; LOCATED IN: chloroplast; EXPRESSED IN: 22 plant structures; EXPRESSED DURING: 13 growth stages; Has 23 Blast hits to 23 proteins in 10 species: Archae - 0; Bacteria - 0; Metazoa - 0; Fungi - 0; Plants - 23; Viruses - 0; Other Eukaryotes - 0 (source: NCBI BLink).
Ghir_A07G008760	5.24381	0.513639	-3.18971	0.00587029	down	AT3G02230	reversibly glycosylated polypeptide 1
Ghir_A07G009830	1.56509	0.136783	-3.21005	0.0234814	down	AT5G48480	Lactoylglutathione lyase / glyoxalase I family protein
Ghir_A07G010160	1.00506	0.359396	-1.27325	0.0284332	down	AT2G28560	DNA repair (Rad51) family protein
Ghir_A07G010400	0.616721	0.0580223	-3.17538	0.038356	down	AT5G59790	Domain of unknown function (DUF966)
Ghir_A07G010450	2.2521	0.324738	-2.57435	0.00014884	down	AT5G59950	RNA-binding (RRM/RBD/RNP motifs) family protein
Ghir_A07G010510	0	0.0476107	6.44479	0.0111796	up	AT5G59350	unknown protein; FUNCTIONS IN: molecular_function unknown; INVOLVED IN: biological_process unknown; LOCATED IN: endomembrane system; EXPRESSED IN: 23 plant structures; EXPRESSED DURING: 13 growth stages; Has 1807 Blast hits to 1807 proteins in 277 species: Archae - 0; Bacteria - 0; Metazoa - 736; Fungi - 347; Plants - 385; Viruses - 0; Other Eukaryotes - 339 (source: NCBI BLink).
Ghir_A07G010610	0.329605	0	-7.39927	0.00102133	down	AT5G02440	unknown protein; Has 71 Blast hits to 71 proteins in 12 species: Archae - 0; Bacteria - 0; Metazoa - 0; Fungi - 0; Plants - 71; Viruses - 0; Other Eukaryotes - 0 (source: NCBI BLink).
Ghir_A07G010720	0.868764	0.345698	-1.09427	0.0456487	down	AT1G07530	SCARECROW-like 14
Ghir_A07G010730	2.87531	0.0119263	-7.64321	4.016e-05	down	AT1G07530	SCARECROW-like 14
Ghir_A07G010970	0.509142	2.01144	2.14762	0.0114712	up	AT1G07400	HSP20-like chaperones superfamily protein
Ghir_A07G011110	0	0.168725	8.47815	0.0191477	up	AT2G29670	Tetratricopeptide repeat (TPR)-like superfamily protein
Ghir_A07G011500	0.0473255	0	-5.37378	0.00202226	down	AT1G49320	unknown seed protein like 1
Ghir_A07G011530	0.1379	0.00261267	-4.51674	0.0137221	down	AT2G27770	Plant protein of unknown function (DUF868)
Ghir_A07G011830	0.274504	0	-6.99821	2.52324e-05	down	AT3G44350	NAC domain containing protein 61
Ghir_A07G011960	0.020037	0.38542	4.24813	0.0469656	up	AT5G22220	E2F transcription factor 1
Ghir_A07G011990	0.090911	0	-5.56573	0.0420921	down	AT3G44220	Late embryogenesis abundant (LEA) hydroxyproline-rich glycoprotein family
Ghir_A07G012060	0	0.0406783	24.6766	0.00203072	up	AT2G35940	BEL1-like homeodomain 1
Ghir_A07G012360	0.779319	0.256495	-1.32247	0.0452274	down	AT2G28510	Dof-type zinc finger DNA-binding family protein
Ghir_A07G012460	0.566118	0	-8.91327	0.00144806	down	AT3G02280	Flavodoxin family protein
Ghir_A07G012500	0.0427495	0	-5.0597	0.00999501	down	AT1G61560	Seven transmembrane MLO family protein
Ghir_A07G012780	0.225935	0.0304913	-2.53562	0.0215459	down	AT5G12330	Lateral root primordium (LRP) protein-related
Ghir_A07G012830	0.0146555	0.364954	4.80482	0.0447733	up	AT4G03250	Homeodomain-like superfamily protein
Ghir_A07G013390	2.16733	0.890906	-1.07441	0.0397514	down	AT1G33390	RNA helicase family protein
Ghir_A07G014390	1.22682	0.385481	-1.45256	0.000386621	down	AT1G76390	ARM repeat superfamily protein
Ghir_A07G014430	0.804532	0.330319	-1.05039	0.0276054	down	AT3G61850	Dof-type zinc finger DNA-binding family protein
Ghir_A07G014520	4.12391	0.917876	-1.97006	0.000290704	down	AT1G01300	Eukaryotic aspartyl protease family protein
Ghir_A07G014540	0.519819	1.08616	1.27228	0.00799982	up	AT3G61770	Acid phosphatase/vanadium-dependent haloperoxidase-related protein
Ghir_A07G014750	1.53225	0.11456	-3.57004	0.0200503	down	AT2G46370	Auxin-responsive GH3 family protein
Ghir_A07G014810	2.82139	0.674075	-1.85546	0.00996837	down	AT1G01490	Heavy metal transport/detoxification superfamily protein
Ghir_A07G014990	0	0.077172	6.27439	0.00482088	up	AT4G00330	calmodulin-binding receptor-like cytoplasmic kinase 2
Ghir_A07G015070	1.56395	0	-10.7677	4.38946e-08	down	AT2G45910	U-box domain-containing protein kinase family protein
Ghir_A07G015120	0.0876575	0.00479733	-3.79697	0.0424542	down	AT1G07910	RNAligase
Ghir_A07G015240	0.315246	0.030428	-3.11717	0.0149224	down	AT1G01800	NAD(P)-binding Rossmann-fold superfamily protein
Ghir_A07G015250	0.222932	0	-6.60248	0.00255994	down	AT3G61220	NAD(P)-binding Rossmann-fold superfamily protein
Ghir_A07G015370	0.091952	0	-6.46702	0.000133622	down	AT1G01920	SET domain-containing protein
Ghir_A07G015580	0.001386	1.79597	10.0519	8.45594e-07	up	AT3G60800	DHHC-type zinc finger family protein
Ghir_A07G015590	4.48782	21.6118	2.49217	0.0437192	up	AT4G00100	ribosomal protein S13A
Ghir_A07G015620	25.5582	10.2466	-1.11259	0.00713368	down	AT2G45290	Transketolase
Ghir_A07G016060	0.188681	0.0183843	-2.85741	0.0352687	down	AT4G28560	ROP-interactive CRIB motif-containing protein 7
Ghir_A07G016130	0.004548	0.566066	4.60458	0.0252202	up	AT5G44005	unknown protein; FUNCTIONS IN: molecular_function unknown; INVOLVED IN: biological_process unknown; LOCATED IN: plasma membrane; Has 35333 Blast hits to 34131 proteins in 2444 species: Archae - 798; Bacteria - 22429; Metazoa - 974; Fungi - 991; Plants - 531; Viruses - 0; Other Eukaryotes - 9610 (source: NCBI BLink).
Ghir_A07G016570	1.04396	0.321166	-1.48746	0.000139581	down	AT4G13710	Pectin lyase-like superfamily protein
Ghir_A07G016590	0	0.0540413	7.31882	0.0173717	up	AT3G24715	Protein kinase superfamily protein with octicosapeptide/Phox/Bem1p domain
Ghir_A07G016730	0.048826	0.328265	3.00229	0.0345064	up	AT3G24840	Sec14p-like phosphatidylinositol transfer family protein
Ghir_A07G017460	0	0.257088	7.85619	0.0363647	up	AT3G13224	RNA-binding (RRM/RBD/RNP motifs) family protein
Ghir_A07G017610	5.21729	10.0114	1.11089	0.00887088	up	AT1G04990	Zinc finger C-x8-C-x5-C-x3-H type family protein
Ghir_A07G017730	0.412533	0.00905567	-4.96365	0.00384609	down	AT1G66140	zinc finger protein 4
Ghir_A07G018050	1.58178	4.20759	1.60925	0.00406435	up	AT5G35740	Carbohydrate-binding X8 domain superfamily protein
Ghir_A07G018090	1.93541	4.1708	1.30677	0.0245109	up	AT3G21610	Acid phosphatase/vanadium-dependent haloperoxidase-related protein
Ghir_A07G018170	0.009423	26.1078	11.2909	2.46184e-05	up	AT2G17630	Pyridoxal phosphate (PLP)-dependent transferases superfamily protein
Ghir_A07G018520	1.42379	0.591491	-1.05826	0.0172129	down	AT2G05230	DNAJ heat shock N-terminal domain-containing protein
Ghir_A07G018820	0.732416	0.274632	-1.21176	0.00794365	down	AT3G02450	cell division protein ftsH, putative
Ghir_A07G018870	0.629744	0	-9.769	2.63749e-08	down	AT5G37020	auxin response factor 8
Ghir_A07G019390	0	0.0414687	6.51894	0.0185899	up	AT5G38990	Malectin/receptor-like protein kinase family protein
Ghir_A07G019540	0.0168205	0	-3.7201	0.0473881	down	AT3G51550	Malectin/receptor-like protein kinase family protein
Ghir_A07G019740	0.059486	0	-5.54674	0.00582974	down	AT1G03475	Coproporphyrinogen III oxidase
Ghir_A07G019860	0.759359	0	-25.3776	8.0823e-39	down	AT3G21620	ERD (early-responsive to dehydration stress) family protein
Ghir_A07G019900	0.0916505	0	-6.3642	1.38882e-05	down	AT2G01050	zinc ion binding;nucleic acid binding
Ghir_A07G019940	9.27705	0.116188	-6.08993	0.00534511	down	AT4G15415	Protein phosphatase 2A regulatory B subunit family protein
Ghir_A07G020220	0	0.355182	22.0946	1.3504e-19	up	AT2G04550	indole-3-butyric acid response 5
Ghir_A07G020260	0.534264	12.6865	4.81534	0.00128586	up
Ghir_A07G021060	0.13868	0	-6.53631	0.00279864	down	AT5G12230	MED19A; BEST Arabidopsis thaliana protein match is: unknown protein (TAIR:AT5G19480.2); Has 1807 Blast hits to 1807 proteins in 277 species: Archae - 0; Bacteria - 0; Metazoa - 736; Fungi - 347; Plants - 385; Viruses - 0; Other Eukaryotes - 339 (source: NCBI BLink).
Ghir_A07G021300	2.22873	0.238073	-3.00569	1.48722e-07	down	AT3G07390	auxin-responsive family protein
Ghir_A07G021330	0	0.584081	10.2709	0.00358107	up	AT3G07360	plant U-box 9
Ghir_A07G021540	0.108527	0	-6.63909	0.0340908	down	AT3G25100	cell division cycle 45
Ghir_A07G021630	3.48539	0.770512	-1.97656	0.00564405	down	AT5G48720	x-ray induced transcript 1
Ghir_A07G021650	0.010181	0.208951	3.93471	0.00145609	up
Ghir_A07G021690	0.978892	0	-11.3293	4.08559e-06	down	AT3G24880	Helicase/SANT-associated, DNA binding protein
Ghir_A07G021720	0.197946	0.0303623	-2.3485	0.0147813	down	AT5G48800	Phototropic-responsive NPH3 family protein
Ghir_A07G021870	0	0.10503	5.82204	0.038847	up	AT2G20260	photosystem I subunit E-2
Ghir_A07G021920	0	0.719138	9.64253	2.96526e-05	up	AT4G28706	pfkB-like carbohydrate kinase family protein
Ghir_A07G022020	3.14739	0.45642	-2.57891	0.0115056	down	AT4G28650	Leucine-rich repeat transmembrane protein kinase family protein
Ghir_A07G022060	1.26987	0.200867	-2.42558	0.00744584	down	AT1G04080	Tetratricopeptide repeat (TPR)-like superfamily protein
Ghir_A07G022110	0.038824	0.00344967	-3.22635	0.0402328	down	AT5G44030	cellulose synthase A4
Ghir_A07G022170	0.157187	0	-7.85462	0.00174385	down	AT3G28880	Ankyrin repeat family protein
Ghir_A07G022360	0	0.247949	6.64979	0.00177527	up	AT3G02920	Replication protein A, subunit RPA32
Ghir_A07G022400	0.0305785	0	-5.08016	0.0389586	down	AT5G63710	Leucine-rich repeat protein kinase family protein
Ghir_A07G022700	0.41325	0.00982867	-5.22421	0.0120976	down	AT5G63450	cytochrome P450, family 94, subfamily B, polypeptide 1
Ghir_A07G022970	0.394282	0.0665057	-2.31525	0.00165765	down	AT4G28530	NAC domain containing protein 74
Ghir_A07G022980	24.5675	45.0044	1.09547	0.00658427	up	AT1G03900	non-intrinsic ABC protein 4
Ghir_A07G023060	0.253254	0	-7.34997	1.29653e-05	down	AT2G20430	ROP-interactive CRIB motif-containing protein 6
Ghir_A07G023450	11.6424	0.12101	-6.37223	0.0155724	down	AT5G40150	Peroxidase superfamily protein
Ghir_A07G023550	0.189724	0	-6.94487	0.000139923	down	AT5G26280	TRAF-like family protein
Ghir_A07G023720	0.215555	0	-22.0144	1.13909e-11	down	AT5G14760	L-aspartate oxidase
Ghir_A07G023730	0	0.232893	8.18796	0.0240096	up	AT3G27930	unknown protein; FUNCTIONS IN: molecular_function unknown; INVOLVED IN: N-terminal protein myristoylation; LOCATED IN: cellular_component unknown; EXPRESSED IN: 23 plant structures; EXPRESSED DURING: 14 growth stages; Has 35 Blast hits to 35 proteins in 12 species: Archae - 0; Bacteria - 0; Metazoa - 0; Fungi - 0; Plants - 35; Viruses - 0; Other Eukaryotes - 0 (source: NCBI BLink).
Ghir_A07G023880	0.875949	0.068988	-3.42451	0.000438775	down	AT5G40380	cysteine-rich RLK (RECEPTOR-like protein kinase) 42
Ghir_A07G023890	1.12001	0.151966	-2.61833	0.0398713	down	AT2G46780	RNA-binding (RRM/RBD/RNP motifs) family protein
Ghir_A07G024120	1.93081	0.808528	-1.05043	0.0292461	down	AT3G27560	Protein kinase superfamily protein
Ghir_A07G024190	2.00214	4.57799	1.38749	3.84121e-05	up	AT4G35860	GTP-binding 2
Ghir_A07G024520	0	0.262453	8.68418	0.0208256	up	AT3G27150	Galactose oxidase/kelch repeat superfamily protein
Ghir_A07G024840	0	0.82126	25.4564	0.00131445	up	AT3G26890	unknown protein; FUNCTIONS IN: molecular_function unknown; INVOLVED IN: biological_process unknown; EXPRESSED IN: 24 plant structures; EXPRESSED DURING: 15 growth stages; BEST Arabidopsis thaliana protein match is: unknown protein (TAIR:AT5G41110.1); Has 30201 Blast hits to 17322 proteins in 780 species: Archae - 12; Bacteria - 1396; Metazoa - 17338; Fungi - 3422; Plants - 5037; Viruses - 0; Othe…
Ghir_A07G024960	0.05483	0	-5.9767	0.000739839	down	AT2G13620	cation/hydrogen exchanger 15
Ghir_A07G025280	1.00609	0.001443	-8.36092	0.00151082	down	AT5G58600	Plant protein of unknown function (DUF828)
Ghir_A08G000130	1.1937	0	-9.03834	0.0286513	down	AT5G27430	Signal peptidase subunit
Ghir_A08G000910	1.14975	0	-9.89732	4.43026e-06	down	AT4G33790	Jojoba acyl CoA reductase-related male sterility protein
Ghir_A08G000940	0.091598	0	-5.56576	0.000548344	down	AT1G08280	Glycosyltransferase family 29 (sialyltransferase) family protein
Ghir_A08G001010	0.020639	0	-4.3954	0.03404	down	AT3G52660	RNA-binding (RRM/RBD/RNP motifs) family protein
Ghir_A08G001170	0	3.18032	25.5139	2.46995e-06	up	AT5G21990	Tetratricopeptide repeat (TPR)-like superfamily protein
Ghir_A08G001280	0.231781	0.999828	2.32114	0.0296804	up	AT2G28500	LOB domain-containing protein 11
Ghir_A08G001760	0.196498	1.78097	3.39028	0.0257464	up	AT3G20860	NIMA-related kinase 5
Ghir_A08G001830	2.61094	0.200162	-3.52046	0.00155907	down	AT4G12620	origin of replication complex 1B
Ghir_A08G002160	0.012228	0.070185	2.83745	0.0456451	up	AT5G24710	Transducin/WD40 repeat-like superfamily protein
Ghir_A08G002450	0	0.58825	8.0749	0.0305297	up	AT3G55820	Fasciclin-like arabinogalactan family protein
Ghir_A08G002660	0.0248145	0.299356	3.65583	0.0411266	up	AT1G11390	Protein kinase superfamily protein
Ghir_A08G002760	0.969318	0.227456	-1.85332	0.0282784	down	AT3G15095	unknown protein; FUNCTIONS IN: molecular_function unknown; INVOLVED IN: biological_process unknown; EXPRESSED IN: 22 plant structures; EXPRESSED DURING: 13 growth stages; Has 30201 Blast hits to 17322 proteins in 780 species: Archae - 12; Bacteria - 1396; Metazoa - 17338; Fungi - 3422; Plants - 5037; Viruses - 0; Other Eukaryotes - 2996 (source: NCBI BLink).
Ghir_A08G002960	4.9986	9.66419	1.13817	2.00664e-06	up	AT1G50640	ethylene responsive element binding factor 3
Ghir_A08G002970	0	0.0571983	6.45244	0.0365047	up	AT4G22340	cytidinediphosphate diacylglycerol synthase 2
Ghir_A08G003540	0.276199	0	-7.50506	0.00164989	down	AT1G02090	Proteasome component (PCI) domain protein
Ghir_A08G003750	0.108415	0	-5.65197	0.0140309	down	AT4G33565	RING/U-box superfamily protein
Ghir_A08G003990	0.488196	0	-33.8856	9.37657e-08	down	AT3G02470	S-adenosylmethionine decarboxylase
Ghir_A08G004460	0.591422	0	-9.68355	7.91226e-05	down	AT2G47330	P-loop containing nucleoside triphosphate hydrolases superfamily protein
Ghir_A08G004780	0.0436355	0	-5.47195	0.0224291	down	AT3G42170	BED zinc finger ;hAT family dimerisation domain
Ghir_A08G005370	6.12918	0.442619	-3.5607	0.00492299	down	AT5G39740	ribosomal protein L5 B
Ghir_A08G005490	1.03685	0	-26.9122	0.000491832	down	AT2G04780	FASCICLIN-like arabinoogalactan 7
Ghir_A08G005680	0	0.0997793	21.0998	2.9656e-05	up	AT5G15710	Galactose oxidase/kelch repeat superfamily protein
Ghir_A08G006740	4.36967	1.71069	-1.14536	0.0401582	down	AT4G02590	basic helix-loop-helix (bHLH) DNA-binding superfamily protein
Ghir_A08G006820	0.720947	0.138627	-2.11873	0.00193119	down	AT4G32440	Plant Tudor-like RNA-binding protein
Ghir_A08G007190	0.093814	0	-5.71543	0.000813303	down	AT1G03150	Acyl-CoA N-acyltransferases (NAT) superfamily protein
Ghir_A08G007260	1.10131	2.29976	1.27045	0.0163795	up	AT3G63140	chloroplast stem-loop binding protein of 41 kDa
Ghir_A08G007330	0	0.0911073	6.21246	0.0212563	up	AT4G02830	unknown protein; FUNCTIONS IN: molecular_function unknown; INVOLVED IN: biological_process unknown; LOCATED IN: cellular_component unknown.
Ghir_A08G007430	0.819146	0.326906	-1.11339	0.0297573	down	AT1G03250	unknown protein; Has 89 Blast hits to 89 proteins in 31 species: Archae - 0; Bacteria - 0; Metazoa - 31; Fungi - 0; Plants - 48; Viruses - 0; Other Eukaryotes - 10 (source: NCBI BLink).
Ghir_A08G007530	0	0.168358	7.71803	0.00534191	up	AT1G03350	BSD domain-containing protein
Ghir_A08G007610	0	4.98864	26.4863	2.80058e-12	up
Ghir_A08G008110	4.81205	9.02309	1.08918	0.00296788	up	AT4G02425	unknown protein; FUNCTIONS IN: molecular_function unknown; INVOLVED IN: biological_process unknown; LOCATED IN: chloroplast; Has 29 Blast hits to 28 proteins in 15 species: Archae - 0; Bacteria - 0; Metazoa - 6; Fungi - 0; Plants - 23; Viruses - 0; Other Eukaryotes - 0 (source: NCBI BLink).
Ghir_A08G008490	0.0310385	0	-4.7101	0.00850081	down	AT3G13620	Amino acid permease family protein
Ghir_A08G008530	0.0106475	0.607621	5.85287	0.000312726	up	AT1G16330	cyclin b3;1
Ghir_A08G008770	2.06689	0.424979	-2.05172	5.57999e-10	down	AT5G58090	O-Glycosyl hydrolases family 17 protein
Ghir_A08G008960	0.20322	0.0362897	-2.16053	0.0372432	down	AT5G57480	P-loop containing nucleoside triphosphate hydrolases superfamily protein
Ghir_A08G009820	0	0.177143	21.4566	7.09473e-05	up	AT2G23910	NAD(P)-binding Rossmann-fold superfamily protein
Ghir_A08G009930	0.132656	0.00193667	-4.90958	0.0214976	down	AT5G53420	CCT motif family protein
Ghir_A08G010470	0	0.49622	28.1787	0.000262772	up
Ghir_A08G010510	0	0.128413	22.8298	7.45928e-16	up	AT4G11070	WRKY family transcription factor
Ghir_A08G010700	0.824422	1.58795	1.13541	0.0421999	up	AT4G27700	Rhodanese/Cell cycle control phosphatase superfamily protein
Ghir_A08G010820	1.85679	0.0168547	-6.53349	0.0119498	down	AT4G00730	Homeobox-leucine zipper family protein / lipid-binding START domain-containing protein
Ghir_A08G010890	0.153614	0	-5.66119	0.0220712	down
Ghir_A08G010950	0.455046	0	-7.77702	6.41229e-06	down	AT5G52260	myb domain protein 19
Ghir_A08G011060	0	3.48056	26.0525	1.01092e-12	up	AT4G25630	fibrillarin 2
Ghir_A08G011400	1.68814	4.10652	1.46221	0.0432847	up	AT2G46500	phosphoinositide 4-kinase gamma 4
Ghir_A08G011630	0.17942	0.020693	-2.71552	3.76196e-05	down	AT5G19790	related to AP2 11
Ghir_A08G011790	0.056158	0	-4.75128	0.0448992	down	AT3G42170	BED zinc finger ;hAT family dimerisation domain
Ghir_A08G012030	0.0589385	1.96148	5.25134	0.0217721	up	AT5G53620	unknown protein; INVOLVED IN: biological_process unknown; EXPRESSED IN: 23 plant structures; EXPRESSED DURING: 13 growth stages; Has 28929 Blast hits to 19542 proteins in 1425 species: Archae - 211; Bacteria - 3079; Metazoa - 14558; Fungi - 2157; Plants - 966; Viruses - 80; Other Eukaryotes - 7878 (source: NCBI BLink).
Ghir_A08G012040	0.51319	3.86167	3.10677	0.00231248	up
Ghir_A08G012070	1.30902	0.536341	-1.07207	0.0290061	down	AT5G60750	CAAX amino terminal protease family protein
Ghir_A08G012300	3.7074	1.56074	-1.03856	0.0228755	down	AT5G41460	Protein of unknown function (DUF604)
Ghir_A08G012570	0.99382	2.51263	1.50983	0.0266205	up	AT2G47700	RING/U-box superfamily protein
Ghir_A08G012840	0.042538	0	-4.69297	0.021855	down	AT2G47260	WRKY DNA-binding protein 23
Ghir_A08G012860	0.445646	0	-8.29844	0.000182343	down	AT1G02380	unknown protein; BEST Arabidopsis thaliana protein match is: unknown protein (TAIR:AT4G01960.1); Has 66 Blast hits to 66 proteins in 11 species: Archae - 0; Bacteria - 0; Metazoa - 0; Fungi - 0; Plants - 66; Viruses - 0; Other Eukaryotes - 0 (source: NCBI BLink).
Ghir_A08G013100	0.414349	0	-7.04776	4.73091e-05	down	AT1G02335	germin-like protein subfamily 2 member 2 precursor
Ghir_A08G013140	0.238091	0	-6.05189	0.0209029	down	AT5G63140	purple acid phosphatase 29
Ghir_A08G013590	4.33859	30.4585	3.02343	0.034941	up	AT2G46170	Reticulon family protein
Ghir_A08G013960	0	0.257207	8.93768	0.0225542	up	AT3G61415	SKP1-like 21
Ghir_A08G013960	0	0.125197	21.6268	9.38109e-13	up	AT3G61415	SKP1-like 21
Ghir_A08G013990	0.0642855	0	-4.80843	0.00369742	down	AT4G00310	Putative membrane lipoprotein
Ghir_A08G014220	0	0.147229	6.41148	0.00800151	up	AT1G12390	Cornichon family protein
Ghir_A08G014560	0.753205	0.0597847	-3.43241	0.0082667	down	AT3G60530	GATA transcription factor 4
Ghir_A08G014590	0.061629	0	-6.23995	0.0234155	down	AT2G44980	SNF2 domain-containing protein / helicase domain-containing protein
Ghir_A08G014640	0.383412	0	-7.80982	0.0128638	down	AT2G44940	Integrase-type DNA-binding superfamily protein
Ghir_A08G014760	0.0974665	1.25917	3.86715	0.0486922	up	AT1G02120	GRAM domain family protein
Ghir_A08G014800	4.70896	1.66185	-1.2858	0.0032398	down	AT3G07720	Galactose oxidase/kelch repeat superfamily protein
Ghir_A08G014890	2.75252	1.13958	-1.06969	0.0195932	down	AT4G17080	Histone H3 K4-specific methyltransferase SET7/9 family protein
Ghir_A08G015060	0.204704	0	-7.53687	0.000323882	down	AT3G63470	serine carboxypeptidase-like 40
Ghir_A08G015230	5.45888	1.31214	-1.87547	0.000548773	down	AT3G08030	Protein of unknown function, DUF642
Ghir_A08G015500	0.083322	0	-4.8793	0.00864071	down	AT3G52120	SWAP (Suppressor-of-White-APricot)/surp domain-containing protein / D111/G-patch domain-containing protein
Ghir_A08G015700	0.123649	0	-6.10679	0.00191836	down	AT5G45320	FUNCTIONS IN: molecular_function unknown; INVOLVED IN: biological_process unknown; LOCATED IN: endomembrane system; EXPRESSED IN: inflorescence meristem, root, flower; EXPRESSED DURING: petal differentiation and expansion stage; CONTAINS InterPro DOMAIN/s: Late embryogenesis abundant protein, group 2 (InterPro:IPR004864); BEST Arabidopsis thaliana protein match is: unknown protein (TAIR:AT3G26350…
Ghir_A08G015920	6.73964	0	-33.4516	4.92932e-06	down	AT4G19110	Protein kinase superfamily protein
Ghir_A08G015980	0	0.086937	6.95657	0.00132706	up	AT1G72030	Acyl-CoA N-acyltransferases (NAT) superfamily protein
Ghir_A08G016050	0.338178	0	-8.86933	0.00145609	down	AT4G19020	chromomethylase 2
Ghir_A08G016150	3.65129	0.684365	-2.23382	0.0371444	down	AT1G31930	extra-large GTP-binding protein 3
Ghir_A08G016300	11.7363	0.572716	-4.17398	0.000885568	down	AT2G35470	unknown protein; Has 25 Blast hits to 25 proteins in 8 species: Archae - 0; Bacteria - 0; Metazoa - 0; Fungi - 0; Plants - 25; Viruses - 0; Other Eukaryotes - 0 (source: NCBI BLink).
Ghir_A08G016540	0.352309	0	-7.01677	1.19804e-05	down	AT4G17800	Predicted AT-hook DNA-binding family protein
Ghir_A08G016610	0	0.226336	29.4792	0.000114235	up	AT1G32560	Late embryogenesis abundant protein, group 1 protein
Ghir_A08G016770	0.000886	0.36299	8.228	0.0452564	up	AT4G18010	myo-inositol polyphosphate 5-phosphatase 2
Ghir_A08G017470	4.73989	1.80722	-1.17277	0.0448232	down	AT5G47240	nudix hydrolase homolog 8
Ghir_A08G017530	0	0.0605473	6.87647	0.00988212	up	AT4G17440	Protein of unknown function (DUF1639)
Ghir_A08G017730	0.0632295	0	-4.9658	0.00272139	down	AT3G21420	2-oxoglutarate (2OG) and Fe(II)-dependent oxygenase superfamily protein
Ghir_A08G018030	0.102948	0	-6.39119	0.0222443	down	AT1G62710	beta vacuolar processing enzyme
Ghir_A08G018110	1.19036	0.251772	-2.01326	0.00317249	down	AT4G12290	Copper amine oxidase family protein
Ghir_A08G018790	1.05515	0.0725303	-3.65249	0.00195306	down	AT1G12780	UDP-D-glucose/UDP-D-galactose 4-epimerase 1
Ghir_A08G019030	3.75972	1.11494	-1.54596	0.0197854	down	AT1G63470	AT hook motif DNA-binding family protein
Ghir_A08G019170	0.264445	0	-6.36602	0.0329065	down	AT1G63770	Peptidase M1 family protein
Ghir_A08G019290	0.495733	0.0151243	-4.65863	0.00683205	down	AT3G63010	alpha/beta-Hydrolases superfamily protein
Ghir_A08G019300	1.37918	0.150183	-2.97316	0.00173136	down	AT1G03440	Leucine-rich repeat (LRR) family protein
Ghir_A08G019390	8.42339	21.3153	1.55297	0.0224335	up	AT3G63060	Eid1-like 3
Ghir_A08G019430	2.47229	0.483917	-2.13571	0.00371418	down	AT1G03220	Eukaryotic aspartyl protease family protein
Ghir_A08G019470	8.53527	2.89768	-1.36143	0.0225542	down	AT3G63200	PATATIN-like protein 9
Ghir_A08G019800	0.144006	0.756892	2.66555	0.0301801	up	AT3G15420	Transcription factor TFIIIC, tau55-related protein
Ghir_A08G020350	0.250665	0.027388	-2.90865	0.0482578	down	AT5G48820	inhibitor/interactor with cyclin-dependent kinase
Ghir_A08G020570	1.08399	0	-10.6488	0.000141471	down	AT2G27110	FAR1-related sequence 3
Ghir_A08G020930	0.0217525	2.3244	6.85762	0.0276717	up	AT2G28100	alpha-L-fucosidase 1
Ghir_A08G021020	0.407364	0.095264	-1.80729	0.027203	down	AT2G28150	Domain of unknown function (DUF966)
Ghir_A08G021460	0.0737845	0	-6.41369	0.0050382	down	AT1G74150	Galactose oxidase/kelch repeat superfamily protein
Ghir_A08G021860	0.519184	0	-9.56272	9.05229e-06	down	AT1G09040	unknown protein; FUNCTIONS IN: molecular_function unknown; INVOLVED IN: biological_process unknown; LOCATED IN: membrane; EXPRESSED IN: leaf; BEST Arabidopsis thaliana protein match is: unknown protein (TAIR:AT1G09050.1); Has 614 Blast hits to 567 proteins in 104 species: Archae - 2; Bacteria - 12; Metazoa - 344; Fungi - 31; Plants - 81; Viruses - 0; Other Eukaryotes - 144 (source: NCBI BLink).
Ghir_A08G021990	1.76379	0.478153	-1.65445	0.00155679	down	AT3G05330	cyclin family
Ghir_A08G022450	0.177299	0.0131287	-4.04712	0.000887415	down	AT5G28650	WRKY DNA-binding protein 74
Ghir_A08G022540	0.0826775	0.00506133	-3.48384	0.0115459	down	AT2G34930	disease resistance family protein / LRR family protein
Ghir_A08G022580	0.0084465	0.191048	4.61766	4.54603e-05	up	AT4G14340	casein kinase I
Ghir_A08G022660	1.9487	3.69379	1.11624	0.0036969	up	AT1G08530	unknown protein; FUNCTIONS IN: molecular_function unknown; INVOLVED IN: biological_process unknown; LOCATED IN: chloroplast; BEST Arabidopsis thaliana protein match is: unknown protein (TAIR:AT5G09995.2); Has 140 Blast hits to 140 proteins in 53 species: Archae - 0; Bacteria - 63; Metazoa - 0; Fungi - 0; Plants - 76; Viruses - 0; Other Eukaryotes - 1 (source: NCBI BLink).
Ghir_A08G022730	0.124279	1.34575	3.64398	0.0268439	up
Ghir_A08G022860	0	0.0443957	31.1569	1.918e-05	up	AT5G17840	DnaJ/Hsp40 cysteine-rich domain superfamily protein
Ghir_A08G022910	0.631683	0.141063	-1.97645	0.000608102	down	AT5G39660	cycling DOF factor 2
Ghir_A08G023250	1.09606	0	-11.0534	6.56113e-08	down	AT3G03050	cellulose synthase-like D3
Ghir_A08G023410	6.48298	2.76113	-1.02865	0.01172	down	AT5G08430	SWIB/MDM2 domain;Plus-3;GYF
Ghir_A08G023690	0.003002	0.826	8.09813	0.0214045	up	AT1G48380	root hair initiation protein root hairless 1 (RHL1)
Ghir_A08G023780	7.06329	0.0269007	-7.70763	0.0122642	down	AT3G49910	Translation protein SH3-like family protein
Ghir_A08G023930	22.7206	6.09862	-1.69005	0.000122716	down	AT1G65450	HXXXD-type acyl-transferase family protein
Ghir_A08G024060	0.580661	0	-8.45384	7.45463e-05	down	AT5G06720	peroxidase 2
Ghir_A08G024230	0.234096	0	-7.71801	0.011641	down	AT1G22870	Protein kinase family protein with ARM repeat domain
Ghir_A08G024420	0.596484	0	-27.9853	0.000251013	down	AT1G79190	ARM repeat superfamily protein
Ghir_A08G024430	0.191891	0	-7.05304	0.000214649	down	AT1G79180	myb domain protein 63
Ghir_A08G024560	0.086781	0	-5.85733	0.00475499	down	AT3G14440	nine-cis-epoxycarotenoid dioxygenase 3
Ghir_A08G024610	0.697007	0	-33.3302	5.45091e-06	down	AT3G42170	BED zinc finger ;hAT family dimerisation domain
Ghir_A08G024660	1.71354	3.0382	1.04119	0.0105385	up	AT1G53320	tubby like protein 7
Ghir_A08G024940	0.00012	0.3513	8.5089	0.0436983	up	AT5G11430	SPOC domain / Transcription elongation factor S-II protein
Ghir_A08G025150	0.239102	0.0356973	-2.34034	0.0169062	down	AT5G20120	unknown protein; Has 54 Blast hits to 54 proteins in 26 species: Archae - 0; Bacteria - 0; Metazoa - 18; Fungi - 0; Plants - 18; Viruses - 0; Other Eukaryotes - 18 (source: NCBI BLink).
Ghir_A08G025330	0.071704	0.321178	2.30772	0.0488704	up
Ghir_A08G025340	0	0.646271	21.6161	3.45205e-18	up	AT3G24506	unknown protein; FUNCTIONS IN: molecular_function unknown; INVOLVED IN: biological_process unknown; LOCATED IN: chloroplast; EXPRESSED IN: 22 plant structures; EXPRESSED DURING: 14 growth stages; BEST Arabidopsis thaliana protein match is: unknown protein (TAIR:AT2G17240.1); Has 4864 Blast hits to 709 proteins in 125 species: Archae - 0; Bacteria - 592; Metazoa - 786; Fungi - 33; Plants - 410; Vi…
Ghir_A08G025770	0	0.0772083	6.84684	0.0407503	up	AT2G19600	K+ efflux antiporter 4
Ghir_A08G025820	1.066	0.226449	-2.01893	0.0192909	down	AT1G64280	regulatory protein (NPR1)
Ghir_A08G026190	0.243844	0.0128027	-3.89445	0.0267867	down	AT5G25950	Protein of Unknown Function (DUF239)
Ghir_A08G026330	0	0.421797	23.9928	3.45205e-18	up	AT4G28880	casein kinase I-like 3
Ghir_A08G026490	4.59172	22.6002	2.51214	0.025486	up	AT5G57800	Fatty acid hydroxylase superfamily
Ghir_A09G000310	0.057134	0	-19.2342	0.000114235	down	AT5G47860	Protein of unknown function (DUF1350)
Ghir_A09G000490	1.5643	0.228668	-2.53909	0.000543157	down	AT5G51810	gibberellin 20 oxidase 2
Ghir_A09G000500	0.110254	0.006732	-3.58984	0.000340277	down	AT1G16570	UDP-Glycosyltransferase superfamily protein
Ghir_A09G000540	1.79744	0	-10.4603	1.30795e-05	down	AT1G15110	phosphatidyl serine synthase family protein
Ghir_A09G000560	1.00344	1.86458	1.11051	0.00834169	up	AT3G19810	Protein of unknown function (DUF177)
Ghir_A09G000600	0.0299125	0	-4.55326	0.0233289	down	AT2G01170	bidirectional amino acid transporter 1
Ghir_A09G000680	1.33952	0.5145	-1.15877	0.0114321	down
Ghir_A09G000760	0.0643195	0	-4.43001	0.0248721	down
Ghir_A09G001170	0	0.010797	18.8161	3.05459e-06	up	AT5G15410	Cyclic nucleotide-regulated ion channel family protein
Ghir_A09G001480	0	0.283989	23.5311	3.42856e-17	up	AT5G39660	cycling DOF factor 2
Ghir_A09G001630	0.03749	0	-5.61512	0.00355883	down	AT1G26810	galactosyltransferase1
Ghir_A09G002050	0	2.54881	11.6625	3.54689e-09	up	AT1G14340	RNA-binding (RRM/RBD/RNP motifs) family protein
Ghir_A09G002070	0.016736	0.116424	2.83659	0.00275192	up	AT3G01220	homeobox protein 20
Ghir_A09G002110	0.226383	0	-8.50624	0.00194095	down	AT5G25500	unknown protein; Has 1807 Blast hits to 1807 proteins in 277 species: Archae - 0; Bacteria - 0; Metazoa - 736; Fungi - 347; Plants - 385; Viruses - 0; Other Eukaryotes - 339 (source: NCBI BLink).
Ghir_A09G002320	32.6182	12.9921	-1.12251	0.0301708	down	AT3G01280	voltage dependent anion channel 1
Ghir_A09G002710	0.0449155	0	-4.73448	0.0212334	down	AT5G40240	nodulin MtN21 /EamA-like transporter family protein
Ghir_A09G003170	0.020443	0	-4.04217	0.0284948	down	AT2G01050	zinc ion binding;nucleic acid binding
Ghir_A09G003240	1.19999	0.293738	-1.79647	0.00601053	down	AT5G40540	Protein kinase superfamily protein
Ghir_A09G003560	0.15888	0.0227137	-2.82263	0.00745845	down	AT2G40435	BEST Arabidopsis thaliana protein match is: transcription regulators (TAIR:AT3G56220.1); Has 289 Blast hits to 289 proteins in 30 species: Archae - 0; Bacteria - 0; Metazoa - 0; Fungi - 0; Plants - 289; Viruses - 0; Other Eukaryotes - 0 (source: NCBI BLink).
Ghir_A09G003580	1.41355	0.417284	-1.54447	0.0398713	down	AT3G27330	zinc finger (C3HC4-type RING finger) family protein
Ghir_A09G003620	0.0281625	0.187743	2.90681	0.0232978	up	AT3G19340	Protein of unknown function (DUF3754)
Ghir_A09G003820	0.0871635	0	-5.91476	0.000659598	down	AT1G51540	Galactose oxidase/kelch repeat superfamily protein
Ghir_A09G003900	0	0.0821467	6.94309	0.0102345	up	AT5G14180	Myzus persicae-induced lipase 1
Ghir_A09G004400	0.230867	2.3494	3.55207	0.0133635	up	AT5G23890	LOCATED IN: mitochondrion, chloroplast thylakoid membrane, chloroplast, plastid, chloroplast envelope; EXPRESSED IN: 24 plant structures; EXPRESSED DURING: 14 growth stages; CONTAINS InterPro DOMAIN/s: S-layer homology domain (InterPro:IPR001119); BEST Arabidopsis thaliana protein match is: unknown protein (TAIR:AT5G52410.2); Has 1807 Blast hits to 1807 proteins in 277 species: Archae - 0; Bacter…
Ghir_A09G004570	0.112211	0	-5.31016	0.00330121	down
Ghir_A09G004580	0	0.0624583	22.38	1.40925e-21	up	AT4G25520	SEUSS-like 1
Ghir_A09G004620	0.137206	0.004635	-4.32029	1.31895e-05	down	AT5G52100	Dihydrodipicolinate reductase, bacterial/plant
Ghir_A09G004870	0.147584	0	-22.6027	2.50307e-09	down	AT1G24300	GYF domain-containing protein
Ghir_A09G004920	0.133166	0.0273053	-1.95282	0.0104224	down	AT3G27010	TEOSINTE BRANCHED 1, cycloidea, PCF (TCP)-domain family protein 20
Ghir_A09G005340	0.605044	0.153166	-1.72156	0.027186	down	AT1G18470	Transmembrane Fragile-X-F-associated protein
Ghir_A09G005920	15.458	1.31632	-3.40104	0.00820731	down	AT3G18080	B-S glucosidase 44
Ghir_A09G005970	0.277552	0.0611303	-1.76001	0.0181025	down	AT4G13690	unknown protein; Has 37 Blast hits to 37 proteins in 16 species: Archae - 0; Bacteria - 2; Metazoa - 2; Fungi - 0; Plants - 27; Viruses - 0; Other Eukaryotes - 6 (source: NCBI BLink).
Ghir_A09G006010	0.384709	0.0932127	-1.8151	0.0121079	down	AT1G04730	P-loop containing nucleoside triphosphate hydrolases superfamily protein
Ghir_A09G006280	0.112653	0	-6.68485	0.0374848	down	AT1G04160	myosin XI B
Ghir_A09G006310	0.0005535	0.125277	6.70538	0.018391	up	AT3G06030	NPK1-related protein kinase 3
Ghir_A09G006420	0.425122	0.0318533	-3.50679	0.0220287	down	AT1G05410	Protein of unknown function (DUF1423)
Ghir_A09G006720	0.186362	0.00111	-6.82559	0.00978954	down	AT4G13430	isopropyl malate isomerase large subunit 1
Ghir_A09G006790	0	0.635639	23.6269	0.000107987	up	AT5G18950	Tetratricopeptide repeat (TPR)-like superfamily protein
Ghir_A09G006860	0.431957	0.157166	-1.19481	0.0373087	down	AT5G18910	Protein kinase superfamily protein
Ghir_A09G006970	0.140489	0.013293	-2.68859	0.000233978	down	AT4G15720	Tetratricopeptide repeat (TPR)-like superfamily protein
Ghir_A09G007190	0.001164	0	-16.3227	0.000279193	down	AT3G58650	unknown protein; FUNCTIONS IN: molecular_function unknown; INVOLVED IN: biological_process unknown; LOCATED IN: plasma membrane; EXPRESSED IN: 14 plant structures; EXPRESSED DURING: 8 growth stages; BEST Arabidopsis thaliana protein match is: unknown protein (TAIR:AT5G26910.1); Has 2350 Blast hits to 1412 proteins in 248 species: Archae - 0; Bacteria - 487; Metazoa - 577; Fungi - 236; Plants - 18…
Ghir_A09G007310	0.540605	0	-10.1924	4.58272e-07	down	AT5G49430	WD40/YVTN repeat-like-containing domain;Bromodomain
Ghir_A09G007820	0.222054	0	-6.92571	6.25967e-05	down	AT4G21510	F-box family protein
Ghir_A09G008080	0.335915	0.0473637	-2.50007	0.0495114	down	AT5G44210	erf domain protein 9
Ghir_A09G008140	0.0013785	0.121826	6.1308	0.00464944	up	AT2G39200	Seven transmembrane MLO family protein
Ghir_A09G008160	6.32306	1.17156	-2.2191	0.00279864	down	AT4G18570	Tetratricopeptide repeat (TPR)-like superfamily protein
Ghir_A09G008270	1.80825	0.498324	-1.6475	0.0037353	down	AT4G18820	AAA-type ATPase family protein
Ghir_A09G008340	0.129562	0	-5.88701	0.00498918	down	AT3G14280	unknown protein; Has 51 Blast hits to 51 proteins in 13 species: Archae - 0; Bacteria - 0; Metazoa - 0; Fungi - 0; Plants - 51; Viruses - 0; Other Eukaryotes - 0 (source: NCBI BLink).
Ghir_A09G008440	0.989152	0.0279063	-4.88142	2.2497e-07	down	AT1G56130	Leucine-rich repeat transmembrane protein kinase
Ghir_A09G008480	1.90194	0.566464	-1.54997	8.62953e-06	down	AT5G45110	NPR1-like protein 3
Ghir_A09G008610	0.207905	0.670547	1.85986	0.0290069	up	AT4G18230	FUNCTIONS IN: molecular_function unknown; INVOLVED IN: biological_process unknown; LOCATED IN: endomembrane system; EXPRESSED IN: 23 plant structures; EXPRESSED DURING: 13 growth stages; CONTAINS InterPro DOMAIN/s: Oligosaccharide biosynthesis protein Alg14 like (InterPro:IPR013969); Has 640 Blast hits to 640 proteins in 277 species: Archae - 4; Bacteria - 281; Metazoa - 94; Fungi - 127; Plants -…
Ghir_A09G009140	0.041183	0.30369	3.05796	0.0169356	up	AT1G79990	structural molecules
Ghir_A09G009390	0.231105	0.0262573	-2.87903	0.00215757	down	AT1G52510	alpha/beta-Hydrolases superfamily protein
Ghir_A09G009440	7.50409	1.82649	-1.82867	0.00473027	down	AT1G15690	Inorganic H pyrophosphatase family protein
Ghir_A09G009860	0.640061	0	-8.52368	0.00354769	down	AT2G29960	cyclophilin 5
Ghir_A09G009970	0.50099	0	-8.14345	0.00426046	down	AT3G53310	AP2/B3-like transcriptional factor family protein
Ghir_A09G010110	12.5688	23.1723	1.08269	0.00250795	up	AT5G03740	histone deacetylase 2C
Ghir_A09G010120	11.0044	3.56198	-1.42089	1.00742e-06	down	AT2G27830	unknown protein; BEST Arabidopsis thaliana protein match is: unknown protein (TAIR:AT4G22758.1); Has 131 Blast hits to 131 proteins in 17 species: Archae - 0; Bacteria - 0; Metazoa - 0; Fungi - 0; Plants - 131; Viruses - 0; Other Eukaryotes - 0 (source: NCBI BLink).
Ghir_A09G010170	2.64628	1.0711	-1.09183	0.0159485	down	AT3G44716	unknown protein; FUNCTIONS IN: molecular_function unknown; INVOLVED IN: biological_process unknown; LOCATED IN: endomembrane system; Has 30201 Blast hits to 17322 proteins in 780 species: Archae - 12; Bacteria - 1396; Metazoa - 17338; Fungi - 3422; Plants - 5037; Viruses - 0; Other Eukaryotes - 2996 (source: NCBI BLink).
Ghir_A09G010180	4.01312	0.078352	-5.41215	0.00458698	down	AT2G27760	tRNAisopentenyltransferase 2
Ghir_A09G010740	3.17189	0.912152	-1.58289	0.000604632	down	AT2G27230	transcription factor-related
Ghir_A09G010920	0.107652	0	-5.29752	0.00191863	down	AT2G27180	unknown protein; BEST Arabidopsis thaliana protein match is: unknown protein (TAIR:AT3G11690.1); Has 99 Blast hits to 99 proteins in 14 species: Archae - 0; Bacteria - 0; Metazoa - 0; Fungi - 0; Plants - 99; Viruses - 0; Other Eukaryotes - 0 (source: NCBI BLink).
Ghir_A09G011470	2.02719	1848.66	10.0097	6.95336e-13	up	AT5G03170	FASCICLIN-like arabinogalactan-protein 11
Ghir_A09G011620	0.0980745	0	-5.49395	0.0317178	down	AT2G01250	Ribosomal protein L30/L7 family protein
Ghir_A09G011800	0	0.634218	23.6224	5.32151e-15	up	AT5G13500	unknown protein; FUNCTIONS IN: molecular_function unknown; INVOLVED IN: biological_process unknown; LOCATED IN: endomembrane system; EXPRESSED IN: 22 plant structures; EXPRESSED DURING: 13 growth stages; BEST Arabidopsis thaliana protein match is: unknown protein (TAIR:AT5G25265.1); Has 35333 Blast hits to 34131 proteins in 2444 species: Archae - 798; Bacteria - 22429; Metazoa - 974; Fungi - 991;…
Ghir_A09G012000	3.70557	0.862532	-1.90198	0.0124376	down	AT5G12440	CCCH-type zinc fingerfamily protein with RNA-binding domain
Ghir_A09G012060	0.0704235	0	-3.87713	0.0436983	down
Ghir_A09G012550	0.132627	2.13482	4.14665	0.00159455	up	AT1G71860	protein tyrosine phosphatase 1
Ghir_A09G013020	3.55589	0.951414	-1.68627	0.00717305	down	AT3G57330	autoinhibited Ca2+-ATPase 11
Ghir_A09G013260	0.178112	0	-7.54258	0.00593446	down	AT1G68030	RING/FYVE/PHD zinc finger superfamily protein
Ghir_A09G013310	0.101664	47.7379	9.0088	0.00230909	up
Ghir_A09G013340	6.50923	2.50625	-1.16331	0.0390231	down	AT5G06940	Leucine-rich repeat receptor-like protein kinase family protein
Ghir_A09G013410	0.193583	0.00148233	-5.45218	0.000332015	down	AT3G57810	Cysteine proteinases superfamily protein
Ghir_A09G013450	0	0.0289557	5.54527	0.0421623	up	AT5G06905	cytochrome P450, family 712, subfamily A, polypeptide 2
Ghir_A09G013860	0.668972	0.117616	-2.26223	0.000843133	down	AT3G11980	Jojoba acyl CoA reductase-related male sterility protein
Ghir_A09G013960	0.361059	0	-8.38557	0.00106723	down	AT3G11950	TRAF-like superfamily protein
Ghir_A09G014190	1.49379	0	-25.732	7.04551e-28	down	AT5G22030	ubiquitin-specific protease 8
Ghir_A09G014400	1.06568	0.374079	-1.26733	0.0102962	down	AT3G52480	unknown protein; FUNCTIONS IN: molecular_function unknown; INVOLVED IN: biological_process unknown; LOCATED IN: endomembrane system; EXPRESSED IN: 10 plant structures; EXPRESSED DURING: LP.04 four leaves visible, 4 anthesis, petal differentiation and expansion stage; Has 28 Blast hits to 28 proteins in 7 species: Archae - 0; Bacteria - 0; Metazoa - 0; Fungi - 0; Plants - 28; Viruses - 0; Other Eu…
Ghir_A09G014420	0.206948	0.001349	-6.10729	0.0054352	down	AT3G28430	unknown protein; FUNCTIONS IN: molecular_function unknown; INVOLVED IN: biological_process unknown; LOCATED IN: mitochondrion; EXPRESSED IN: 17 plant structures; EXPRESSED DURING: 6 growth stages; CONTAINS InterPro DOMAIN/s: Protein of unknown function FPL (InterPro:IPR019155); Has 243 Blast hits to 233 proteins in 101 species: Archae - 0; Bacteria - 0; Metazoa - 110; Fungi - 0; Plants - 53; Viru…
Ghir_A09G014510	0.2041	0	-6.25652	0.0445324	down	AT1G52340	NAD(P)-binding Rossmann-fold superfamily protein
Ghir_A09G014520	2.01778	5.00544	1.50706	0.00168811	up	AT1G52340	NAD(P)-binding Rossmann-fold superfamily protein
Ghir_A09G014550	0.0005515	0.32065	7.21218	0.00361915	up	AT4G12080	AT-hook motif nuclear-localized protein 1
Ghir_A09G014650	1.40642	0.232143	-2.36424	1.76279e-06	down	AT5G03670	unknown protein; BEST Arabidopsis thaliana protein match is: unknown protein (TAIR:AT2G36420.1); Has 700 Blast hits to 624 proteins in 104 species: Archae - 0; Bacteria - 18; Metazoa - 333; Fungi - 60; Plants - 73; Viruses - 24; Other Eukaryotes - 192 (source: NCBI BLink).
Ghir_A09G014670	0.24179	0	-7.60383	0.000510702	down	AT3G52910	growth-regulating factor 4
Ghir_A09G014770	0.049818	0	-5.10611	0.0088346	down	AT3G52780	Purple acid phosphatases superfamily protein
Ghir_A09G014830	0	0.06391	5.70069	0.0275104	up	AT3G10120	unknown protein; BEST Arabidopsis thaliana protein match is: unknown protein (TAIR:AT5G03890.1); Has 57 Blast hits to 57 proteins in 10 species: Archae - 0; Bacteria - 0; Metazoa - 0; Fungi - 0; Plants - 57; Viruses - 0; Other Eukaryotes - 0 (source: NCBI BLink).
Ghir_A09G014850	1.49641	0.31844	-2.00392	0.00535706	down	AT5G03870	Glutaredoxin family protein
Ghir_A09G014910	5.57533	2.3149	-1.05671	0.0352625	down	AT3G52610	unknown protein; Has 68 Blast hits to 67 proteins in 21 species: Archae - 0; Bacteria - 11; Metazoa - 0; Fungi - 0; Plants - 55; Viruses - 0; Other Eukaryotes - 2 (source: NCBI BLink).
Ghir_A09G014920	0.425028	0.0342737	-3.36706	0.0286702	down	AT3G52610	unknown protein; Has 68 Blast hits to 67 proteins in 21 species: Archae - 0; Bacteria - 11; Metazoa - 0; Fungi - 0; Plants - 55; Viruses - 0; Other Eukaryotes - 2 (source: NCBI BLink).
Ghir_A09G014930	1.54209	0.012814	-6.58787	0.00053515	down	AT2G36200	P-loop containing nucleoside triphosphate hydrolases superfamily protein
Ghir_A09G015250	0.101399	0.290591	1.73954	0.0163355	up	AT2G36650	unknown protein; Has 35333 Blast hits to 34131 proteins in 2444 species: Archae - 798; Bacteria - 22429; Metazoa - 974; Fungi - 991; Plants - 531; Viruses - 0; Other Eukaryotes - 9610 (source: NCBI BLink).
Ghir_A09G015260	0.00675	0.166186	4.52358	0.0120821	up	AT2G27930	PLATZ transcription factor family protein
Ghir_A09G015330	0.110489	0.0336063	-2.17548	0.0179103	down	AT1G75800	Pathogenesis-related thaumatin superfamily protein
Ghir_A09G015500	6.37862	12.1863	1.13035	0.000118472	up	AT2G36880	methionine adenosyltransferase 3
Ghir_A09G015650	0.0870305	0	-4.9929	0.0245335	down	AT2G36985	DVL family protein
Ghir_A09G015770	0.401693	0.0243903	-3.36861	0.0192874	down
Ghir_A09G015850	1.71467	3.96263	1.40944	0.00125897	up	AT5G03230	Protein of unknown function, DUF584
Ghir_A09G015880	5.2378	0.586062	-2.97051	0.00267726	down	AT2G37170	plasma membrane intrinsic protein 2
Ghir_A09G016050	0.864393	0.0371597	-4.29844	0.00029166	down	AT5G03040	IQ-domain 2
Ghir_A09G016070	0.627635	0	-9.44265	0.000219435	down	AT2G37080	ROP interactive partner 3
Ghir_A09G016160	1.52607	0.304883	-2.08775	0.00451569	down	AT3G53950	glyoxal oxidase-related protein
Ghir_A09G016280	0.652866	0.10663	-2.39909	0.0433729	down	AT3G53810	Concanavalin A-like lectin protein kinase family protein
Ghir_A09G016380	0	0.103115	7.66457	0.000588569	up	AT3G46590	TRF-like 1
Ghir_A09G016610	0.900775	0.12269	-2.55377	5.45091e-06	down	AT5G02520	CONTAINS InterPro DOMAIN/s: SANT associated (InterPro:IPR015216); BEST Arabidopsis thaliana protein match is: kinase interacting family protein (TAIR:AT1G58210.1); Has 842 Blast hits to 736 proteins in 154 species: Archae - 2; Bacteria - 99; Metazoa - 236; Fungi - 52; Plants - 90; Viruses - 0; Other Eukaryotes - 363 (source: NCBI BLink).
Ghir_A09G016750	0.109081	0.00422967	-4.39775	0.010432	down	AT2G37440	DNAse I-like superfamily protein
Ghir_A09G016760	0.244729	0.019589	-3.39562	0.0252443	down	AT2G37430	C2H2 and C2HC zinc fingers superfamily protein
Ghir_A09G016830	0.034403	0	-4.29761	0.0347861	down	AT2G39370	unknown protein; BEST Arabidopsis thaliana protein match is: unknown protein (TAIR:AT2G37380.1); Has 184 Blast hits to 178 proteins in 53 species: Archae - 0; Bacteria - 58; Metazoa - 9; Fungi - 0; Plants - 103; Viruses - 0; Other Eukaryotes - 14 (source: NCBI BLink).
Ghir_A09G017230	5.39461	1.10555	-2.09552	0.0113631	down	AT3G54140	peptide transporter 1
Ghir_A09G017440	0.037712	0	-4.83949	0.0473881	down	AT5G01380	Homeodomain-like superfamily protein
Ghir_A09G017450	0.144454	0	-7.30568	0.00264191	down	AT5G01370	ALC-interacting protein 1
Ghir_A09G017620	0.575074	7.48087	3.91628	1.05609e-22	up	AT5G01620	TRICHOME BIREFRINGENCE-LIKE 35
Ghir_A09G018190	0.030565	0	-3.90561	0.0464267	down	AT4G24660	homeobox protein 22
Ghir_A09G018310	1.6111	0.573548	-1.27153	0.0116783	down	AT1G73590	Auxin efflux carrier family protein
Ghir_A09G018480	3.33569	6.79946	1.21883	0.04829	up
Ghir_A09G018570	1.86309	0.532061	-1.58936	0.00943512	down	AT1G13360	unknown protein; BEST Arabidopsis thaliana protein match is: unknown protein (TAIR:AT3G25870.1); Has 69 Blast hits to 69 proteins in 16 species: Archae - 0; Bacteria - 0; Metazoa - 6; Fungi - 0; Plants - 63; Viruses - 0; Other Eukaryotes - 0 (source: NCBI BLink).
Ghir_A09G018640	8.21513	41.3196	2.52467	0.00701451	up	AT4G22680	myb domain protein 85
Ghir_A09G018750	0.354226	0	-8.67886	0.000698692	down	AT5G62170	unknown protein; BEST Arabidopsis thaliana protein match is: unknown protein (TAIR:AT5G51850.1); Has 381 Blast hits to 359 proteins in 81 species: Archae - 0; Bacteria - 16; Metazoa - 101; Fungi - 21; Plants - 99; Viruses - 3; Other Eukaryotes - 141 (source: NCBI BLink).
Ghir_A09G018830	0.131269	0	-7.985	0.00402866	down	AT5G07280	Leucine-rich repeat transmembrane protein kinase
Ghir_A09G019080	0.0997635	0	-4.86169	0.0176462	down	AT3G16520	UDP-glucosyl transferase 88A1
Ghir_A09G019370	0.212371	0	-8.43397	0.00744834	down	AT5G24350	CONTAINS InterPro DOMAIN/s: Secretory pathway Sec39 (InterPro:IPR013244); Has 1807 Blast hits to 1807 proteins in 277 species: Archae - 0; Bacteria - 0; Metazoa - 736; Fungi - 347; Plants - 385; Viruses - 0; Other Eukaryotes - 339 (source: NCBI BLink).
Ghir_A09G019440	0.498189	0	-9.39866	0.000759064	down	AT5G53620	unknown protein; INVOLVED IN: biological_process unknown; EXPRESSED IN: 23 plant structures; EXPRESSED DURING: 13 growth stages; Has 28929 Blast hits to 19542 proteins in 1425 species: Archae - 211; Bacteria - 3079; Metazoa - 14558; Fungi - 2157; Plants - 966; Viruses - 80; Other Eukaryotes - 7878 (source: NCBI BLink).
Ghir_A09G019670	0.112106	0	-6.43167	0.000588569	down	AT4G24140	alpha/beta-Hydrolases superfamily protein
Ghir_A09G019840	0	0.0529687	5.53742	0.0221705	up	AT1G64480	calcineurin B-like protein 8
Ghir_A09G020050	0.16879	0	-6.26288	0.000221194	down	AT5G41380	CCT motif family protein
Ghir_A09G020060	0.09419	0.00120967	-5.00548	0.0454391	down	AT1G19330	unknown protein; FUNCTIONS IN: molecular_function unknown; INVOLVED IN: biological_process unknown; LOCATED IN: cellular_component unknown; EXPRESSED IN: 22 plant structures; EXPRESSED DURING: 13 growth stages; BEST Arabidopsis thaliana protein match is: unknown protein (TAIR:AT1G75060.1).
Ghir_A09G020120	1.5573	0.00336	-8.40785	3.16197e-06	down	AT1G63430	Leucine-rich repeat protein kinase family protein
Ghir_A09G020190	1.97397	0.730281	-1.20178	0.0114178	down	AT4G11860	Protein of unknown function (DUF544)
Ghir_A09G020410	2.32062	0.355546	-2.54251	0.0116434	down	AT1G12240	Glycosyl hydrolases family 32 protein
Ghir_A09G020990	1.09453	0.0200527	-5.36155	2.31943e-05	down	AT3G23880	F-box and associated interaction domains-containing protein
Ghir_A09G021440	0	0.325578	9.2704	3.58503e-05	up	AT3G07130	purple acid phosphatase 15
Ghir_A09G021490	0.532958	0	-8.32445	0.00447182	down	AT4G22330	Alkaline phytoceramidase (aPHC)
Ghir_A09G021670	1.23908	0.058295	-4.18121	0.030812	down	AT3G23740	unknown protein; FUNCTIONS IN: molecular_function unknown; INVOLVED IN: biological_process unknown; LOCATED IN: chloroplast; EXPRESSED IN: 9 plant structures; EXPRESSED DURING: C globular stage, F mature embryo stage, petal differentiation and expansion stage, E expanded cotyledon stage, D bilateral stage; BEST Arabidopsis thaliana protein match is: unknown protein (TAIR:AT4G14120.1); Has 155 Bla…
Ghir_A09G021780	0.111217	0	-6.20591	0.00222181	down	AT3G07880	Immunoglobulin E-set superfamily protein
Ghir_A09G021860	9.60254	2.35759	-1.81685	0.00924237	down	AT3G28040	Leucine-rich receptor-like protein kinase family protein
Ghir_A09G021880	2.28403	0	-25.8607	6.11884e-38	down	AT1G05950	unknown protein; Has 50 Blast hits to 45 proteins in 14 species: Archae - 5; Bacteria - 0; Metazoa - 4; Fungi - 0; Plants - 34; Viruses - 0; Other Eukaryotes - 7 (source: NCBI BLink).
Ghir_A09G022330	0.171805	0	-8.11921	0.00244871	down	AT4G27190	NB-ARC domain-containing disease resistance protein
Ghir_A09G022870	13.4153	25.0879	1.09001	0.0161819	up	AT3G05980	unknown protein; BEST Arabidopsis thaliana protein match is: unknown protein (TAIR:AT5G19340.1); Has 202 Blast hits to 202 proteins in 28 species: Archae - 0; Bacteria - 0; Metazoa - 39; Fungi - 4; Plants - 148; Viruses - 0; Other Eukaryotes - 11 (source: NCBI BLink).
Ghir_A09G022880	0.060368	0	-5.62977	0.00551564	down	AT5G26340	Major facilitator superfamily protein
Ghir_A09G022980	5.41021	10.2079	1.11788	0.0067268	up	AT2G32120	heat-shock protein 70T-2
Ghir_A09G023050	94.4551	36.0893	-1.18099	0.025697	down	AT3G22440	FRIGidA-like protein
Ghir_A09G023250	0.104539	0	-6.81423	0.0162716	down	AT2G32010	CVP2 like 1
Ghir_A09G023340	7.04362	14.0843	1.1928	0.000937486	up	AT5G43850	RmlC-like cupins superfamily protein
Ghir_A09G023410	0.08323	0.0101473	-2.54493	0.0308492	down	AT3G22880	DNA repair (Rad51) family protein
Ghir_A09G023430	4.50872	0.0257943	-7.24266	0.000237126	down	AT5G43810	Stabilizer of iron transporter SufD / Polynucleotidyl transferase
Ghir_A09G023500	0.448692	0.0115377	-4.1064	0.0114321	down	AT3G22942	G-protein gamma subunit 2
Ghir_A09G023670	0.114002	0.00218567	-4.97078	0.0434866	down	AT5G43745	Protein of unknown function (DUF1012)
Ghir_A09G023760	57.246	149.989	1.57648	0.0165488	up	AT5G09500	Ribosomal protein S19 family protein
Ghir_A09G024010	0.142606	0	-7.79356	2.51296e-08	down	AT1G06620	2-oxoglutarate (2OG) and Fe(II)-dependent oxygenase superfamily protein
Ghir_A09G024590	0.274666	0	-7.72888	0.0408907	down	AT4G13110	BSD domain-containing protein
Ghir_A09G025200	4.61115	9.69596	1.27986	0.00460897	up	AT5G49120	Protein of unknown function (DUF581)
Ghir_A09G025810	0.0034195	0.065033	4.3271	0.0133467	up	AT5G07940	FUNCTIONS IN: molecular_function unknown; INVOLVED IN: biological_process unknown; LOCATED IN: cellular_component unknown; EXPRESSED IN: pollen tube; BEST Arabidopsis thaliana protein match is: dentin sialophosphoprotein-related (TAIR:AT5G07980.1).
Ghir_A09G025850	3.6123	0.494031	-2.65644	0.0105449	down	AT3G02310	K-box region and MADS-box transcription factor family protein
Ghir_A09G025990	3.19172	1.26673	-1.12666	0.000449056	down	AT3G48430	relative of early flowering 6
Ghir_A09G026310	0.182995	0.019912	-2.83692	0.00676999	down	AT5G61910	DCD (Development and Cell Death) domain protein
Ghir_A09G026360	0.130902	0.004399	-4.30641	6.51486e-06	down	AT4G25120	P-loop containing nucleoside triphosphate hydrolases superfamily protein
Ghir_A10G000120	0.172862	1.53664	3.35865	0.00415049	up	AT1G30620	NAD(P)-binding Rossmann-fold superfamily protein
Ghir_A10G000290	2.7994	0.222342	-3.47962	0.00535158	down	AT5G44400	FAD-binding Berberine family protein
Ghir_A10G000330	0	1.47438	26.6303	0.000672258	up	AT3G21215	RNA-binding (RRM/RBD/RNP motifs) family protein
Ghir_A10G000360	7.041	2.50732	-1.27677	3.51505e-06	down	AT4G16380	Heavy metal transport/detoxification superfamily protein
Ghir_A10G000390	25.3422	49.573	1.17207	0.0230043	up	AT2G35760	Uncharacterised protein family (UPF0497)
Ghir_A10G000400	2.6668	5.82979	1.35098	0.037132	up	AT5G47520	RAB GTPase homolog A5A
Ghir_A10G000540	2.79471	1.05957	-1.18846	0.017629	down	AT4G22290	Ubiquitin-specific protease family C19-related protein
Ghir_A10G000730	0.516579	0.01141	-5.314	0.0143686	down	AT1G62300	WRKY family transcription factor
Ghir_A10G001210	0.079094	0	-5.85578	0.000683489	down	AT1G61740	Sulfite exporter TauE/SafE family protein
Ghir_A10G001300	0	1.45852	23.9965	0.00284655	up	AT1G11480	eukaryotic translation initiation factor-related
Ghir_A10G001400	0.518409	0.055622	-3.02696	0.0278045	down	AT1G11300	protein serine/threonine kinases;protein kinases;ATP binding;sugar binding;kinases;carbohydrate binding
Ghir_A10G001580	0.1272	0.003276	-4.72931	0.000902669	down	AT1G11380	PLAC8 family protein
Ghir_A10G001630	0.981997	0.081703	-3.37272	0.0110421	down	AT1G11190	bifunctional nuclease i
Ghir_A10G001920	0.161569	0	-7.66203	0.00247429	down	AT1G61210	Transducin/WD40 repeat-like superfamily protein
Ghir_A10G001940	0.694461	0.0246717	-4.42321	0.000844259	down	AT1G11120	unknown protein; FUNCTIONS IN: molecular_function unknown; INVOLVED IN: biological_process unknown; LOCATED IN: cellular_component unknown; EXPRESSED IN: 10 plant structures; EXPRESSED DURING: 4 anthesis, F mature embryo stage, petal differentiation and expansion stage, E expanded cotyledon stage, D bilateral stage; BEST Arabidopsis thaliana protein match is: unknown protein (TAIR:AT4G28170.1); H…
Ghir_A10G001970	0.0234315	0	-4.32867	0.0313836	down	AT1G11080	serine carboxypeptidase-like 31
Ghir_A10G002060	0.106966	0	-7.49746	0.00370483	down	AT4G04920	sensitive to freezing 6
Ghir_A10G002390	1.22859	0.320148	-1.704	0.00118328	down	AT1G28310	Dof-type zinc finger DNA-binding family protein
Ghir_A10G002430	2.22537	0.504942	-1.9388	0.00124849	down	AT1G28360	ERF domain protein 12
Ghir_A10G002700	0.119695	0	-6.32926	0.0160279	down	AT2G34010	unknown protein; BEST Arabidopsis thaliana protein match is: unknown protein (TAIR:AT1G29010.1); Has 32 Blast hits to 31 proteins in 9 species: Archae - 0; Bacteria - 0; Metazoa - 0; Fungi - 5; Plants - 25; Viruses - 0; Other Eukaryotes - 2 (source: NCBI BLink).
Ghir_A10G002890	0.146096	0.007567	-3.59919	0.0411199	down	AT1G29530	unknown protein; BEST Arabidopsis thaliana protein match is: unknown protein (TAIR:AT2G34310.3); Has 84 Blast hits to 78 proteins in 24 species: Archae - 2; Bacteria - 4; Metazoa - 9; Fungi - 8; Plants - 55; Viruses - 0; Other Eukaryotes - 6 (source: NCBI BLink).
Ghir_A10G002920	0.06877	0	-5.44341	0.00327218	down	AT1G17020	senescence-related gene 1
Ghir_A10G003130	0.596285	0	-9.87139	3.83258e-07	down	AT4G18820	AAA-type ATPase family protein
Ghir_A10G003370	2.18175	0.37251	-2.33043	0.0236176	down	AT1G29240	Protein of unknown function (DUF688)
Ghir_A10G003690	0.290876	0.0154487	-3.49614	0.0187594	down	AT1G06475	unknown protein; Has 35333 Blast hits to 34131 proteins in 2444 species: Archae - 798; Bacteria - 22429; Metazoa - 974; Fungi - 991; Plants - 531; Viruses - 0; Other Eukaryotes - 9610 (source: NCBI BLink).
Ghir_A10G003700	5.21977	0	-11.5833	1.55472e-14	down	AT2G34450	HMG-box (high mobility group) DNA-binding family protein
Ghir_A10G003800	27.142	6.78152	-1.7983	0.00201278	down	AT2G34510	Protein of unknown function, DUF642
Ghir_A10G003820	0.876629	0.140991	-2.46429	0.0431536	down	AT5G46240	potassium channel in Arabidopsis thaliana 1
Ghir_A10G003960	0.0046455	0.274836	6.01554	0.00681976	up	AT5G46210	cullin4
Ghir_A10G004230	0.449136	0.127795	-1.53543	0.00123869	down	AT1G30320	Remorin family protein
Ghir_A10G004300	0	0.544952	24.5867	3.00366e-08	up	AT2G35140	DCD (Development and Cell Death) domain protein
Ghir_A10G004420	0.191532	0.025434	-2.50182	0.0342836	down	AT2G35640	Homeodomain-like superfamily protein
Ghir_A10G004450	1.17756	0.167723	-2.5612	0.00384536	down	AT5G45170	Haloacid dehalogenase-like hydrolase (HAD) superfamily protein
Ghir_A10G004530	4.30239	0.0690733	-5.76727	4.87459e-05	down	AT2G30070	potassium transporter 1
Ghir_A10G004840	0.142489	0	-5.55955	0.00613915	down	AT1G53903	Protein of unknown function (DUF581)
Ghir_A10G005030	0.38849	0	-8.10242	0.00341292	down	AT1G72830	nuclear factor Y, subunit A3
Ghir_A10G005090	0.0951215	2.14221	4.6082	0.0347428	up	AT1G72650	TRF-like 6
Ghir_A10G005100	0.033526	0.392163	3.71578	0.00857618	up	AT1G17455	ELF4-like 4
Ghir_A10G005220	0.40304	0	-7.77396	0.000391845	down	AT2G25940	alpha-vacuolar processing enzyme
Ghir_A10G005730	11.1122	20.2255	1.0765	0.0310724	up	AT1G55160	unknown protein; FUNCTIONS IN: molecular_function unknown; INVOLVED IN: biological_process unknown; LOCATED IN: mitochondrion, plastid; EXPRESSED IN: 22 plant structures; EXPRESSED DURING: 13 growth stages; BEST Arabidopsis thaliana protein match is: unknown protein (TAIR:AT2G19530.1); Has 30201 Blast hits to 17322 proteins in 780 species: Archae - 12; Bacteria - 1396; Metazoa - 17338; Fungi - 34…
Ghir_A10G005810	0.0830165	0.00978	-2.70502	0.0111684	down	AT3G21250	multidrug resistance-associated protein 6
Ghir_A10G005860	0.223148	0.0267197	-2.64695	0.0181025	down	AT1G51700	DOF zinc finger protein 1
Ghir_A10G005890	0	0.317126	23.7388	2.78245e-08	up	AT1G51745	Tudor/PWWP/MBT superfamily protein
Ghir_A10G006000	0.308445	0	-7.966	1.46579e-06	down	AT5G40850	urophorphyrin methylase 1
Ghir_A10G006080	0.0385685	0	-4.83721	0.0228755	down	AT1G14520	myo-inositol oxygenase 1
Ghir_A10G006120	0	0.0187747	5.72594	0.0362382	up	AT4G29990	Leucine-rich repeat transmembrane protein kinase protein
Ghir_A10G006270	0.160338	0	-19.9732	0.000610561	down	AT4G26080	Protein phosphatase 2C family protein
Ghir_A10G006280	7.01778	22.6603	1.91869	0.0244897	up	AT1G79750	NADP-malic enzyme 4
Ghir_A10G006370	3.99993	1.63475	-1.07877	0.000499889	down	AT2G25760	Protein kinase family protein
Ghir_A10G006530	0.331211	0.00644767	-5.13556	0.000112771	down	AT5G64440	fatty acid amide hydrolase
Ghir_A10G006700	0.898334	0	-24.0977	2.42934e-25	down	AT3G02065	P-loop containing nucleoside triphosphate hydrolases superfamily protein
Ghir_A10G007170	1.73486	4.90257	1.68959	0.00102363	up	AT1G15370	SNARE-like superfamily protein
Ghir_A10G007320	0.305424	0.0199783	-3.42973	0.00549228	down	AT1G15410	aspartate-glutamate racemase family
Ghir_A10G007380	0.148017	0	-6.59291	0.000132121	down	AT3G15650	alpha/beta-Hydrolases superfamily protein
Ghir_A10G007470	0.903687	0.161114	-2.25948	0.00972765	down	AT1G15490	alpha/beta-Hydrolases superfamily protein
Ghir_A10G007500	0.977005	0.396629	-1.08859	0.0146274	down	AT1G80310	sulfate transmembrane transporters
Ghir_A10G007510	0.152858	0	-22.1946	5.33062e-08	down	AT1G52780	Protein of unknown function (DUF2921)
Ghir_A10G007690	0.0985235	1.29086	3.93206	0.0144002	up	AT1G79990	structural molecules
Ghir_A10G007740	0.142354	0.0167627	-2.44325	0.0330476	down	AT1G02410	cytochrome c oxidase assembly protein CtaG / Cox11 family
Ghir_A10G008050	0.060719	0	-4.74757	0.0465307	down	AT5G27620	cyclin H;1
Ghir_A10G008270	0.179174	0.412121	1.42299	0.0324133	up	AT5G10320	unknown protein; Has 51 Blast hits to 50 proteins in 17 species: Archae - 0; Bacteria - 4; Metazoa - 0; Fungi - 0; Plants - 47; Viruses - 0; Other Eukaryotes - 0 (source: NCBI BLink).
Ghir_A10G008300	0.454861	0.132464	-1.51445	0.0405652	down	AT5G65170	VQ motif-containing protein
Ghir_A10G008640	0.068302	0	-6.61934	1.31379e-05	down	AT2G22560	Kinase interacting (KIP1-like) family protein
Ghir_A10G008790	0.92395	0	-9.7451	0.000142945	down	AT2G22840	growth-regulating factor 1
Ghir_A10G009040	0.161192	0.011087	-3.41606	0.000150573	down	AT3G50620	P-loop containing nucleoside triphosphate hydrolases superfamily protein
Ghir_A10G009180	0.186989	0.004055	-4.92168	0.000549222	down	AT2G23450	Protein kinase superfamily protein
Ghir_A10G009350	0	0.0762623	5.6851	0.0425989	up	AT2G18460	like COV 3
Ghir_A10G009750	0.993803	0	-37.5474	1.64726e-26	down	AT5G66030	Golgi-localized GRIP domain-containing protein
Ghir_A10G009820	0	0.0942103	6.12028	0.0252099	up
Ghir_A10G010120	3.07868	5.70107	1.10182	0.0108622	up	AT1G02680	TBP-associated factor 13
Ghir_A10G010170	0.08388	0.922656	3.68916	0.00709433	up	AT5G18650	CHY-type/CTCHY-type/RING-type Zinc finger protein
Ghir_A10G010280	1.12288	0	-11.1797	2.1361e-05	down	AT5G18700	Protein kinase family protein with ARM repeat domain
Ghir_A10G010290	0.0011555	0.226605	7.23692	0.00445732	up	AT2G28290	P-loop containing nucleoside triphosphate hydrolases superfamily protein
Ghir_A10G010640	2.46473	0.329938	-2.69131	5.1087e-06	down	AT3G23920	beta-amylase 1
Ghir_A10G010820	0.48878	0	-24.4386	4.02065e-13	down	AT2G33435	RNA-binding (RRM/RBD/RNP motifs) family protein
Ghir_A10G010920	14.2048	37.1821	1.58437	0.00220486	up	AT5G35620	Eukaryotic initiation factor 4E protein
Ghir_A10G010950	0	4.86562	25.8742	6.29072e-15	up	AT3G04400	Ribosomal protein L14p/L23e family protein
Ghir_A10G011260	3.27497	0.104693	-4.76921	0.000226718	down
Ghir_A10G011300	0.583693	0.204295	-1.30954	0.0100789	down	AT4G14410	basic helix-loop-helix (bHLH) DNA-binding superfamily protein
Ghir_A10G011470	0.144023	0.00762167	-3.48526	0.036737	down	AT5G43700	AUX/IAA transcriptional regulator family protein
Ghir_A10G011480	0	0.358629	9.73871	0.000419267	up	AT5G43745	Protein of unknown function (DUF1012)
Ghir_A10G011870	3.79533	1.32427	-1.29884	0.0236713	down	AT1G04210	Leucine-rich repeat protein kinase family protein
Ghir_A10G011900	8.68096	3.30421	-1.20207	0.0360462	down	AT5G19320	RAN GTPase activating protein 2
Ghir_A10G012020	0.0327895	0	-4.42249	0.0191477	down	AT5G43750	NAD(P)H dehydrogenase 18
Ghir_A10G012250	0	0.173671	23.6618	6.87754e-18	up	AT2G33180	unknown protein; FUNCTIONS IN: molecular_function unknown; INVOLVED IN: biological_process unknown; LOCATED IN: chloroplast stroma; EXPRESSED IN: 22 plant structures; EXPRESSED DURING: 13 growth stages; Has 57 Blast hits to 57 proteins in 22 species: Archae - 0; Bacteria - 8; Metazoa - 0; Fungi - 0; Plants - 35; Viruses - 0; Other Eukaryotes - 14 (source: NCBI BLink).
Ghir_A10G012320	0.808164	0.229773	-1.59816	0.0039514	down	AT3G24240	Leucine-rich repeat receptor-like protein kinase family protein
Ghir_A10G012350	0	0.383352	9.09518	0.0238738	up	AT5G63520	CONTAINS InterPro DOMAIN/s: F-box domain, Skp2-like (InterPro:IPR022364), FIST C domain (InterPro:IPR019494), FIST domain, N-terminal (InterPro:IPR013702); Has 137 Blast hits to 137 proteins in 56 species: Archae - 0; Bacteria - 88; Metazoa - 6; Fungi - 0; Plants - 32; Viruses - 0; Other Eukaryotes - 11 (source: NCBI BLink).
Ghir_A10G012370	0.964557	0.132379	-2.6447	0.00458698	down	AT3G23940	dehydratase family
Ghir_A10G012640	2.46001	0.335934	-2.66037	0.00433766	down	AT2G32800	protein kinase family protein
Ghir_A10G012760	0.669202	0.104755	-2.48897	0.0343979	down	AT4G13600	Carbohydrate-binding X8 domain superfamily protein
Ghir_A10G012940	0.155414	0	-7.93641	0.000336969	down	AT1G47890	receptor like protein 7
Ghir_A10G013210	0.414108	0	-8.81699	0.000953721	down	AT1G05520	Sec23/Sec24 protein transport family protein
Ghir_A10G013730	0	0.755347	25.1339	0.000309068	up	AT2G43160	ENTH/VHS family protein
Ghir_A10G014000	0.016961	0.377756	4.71526	0.00517019	up	AT2G43280	Far-red impaired responsive (FAR1) family protein
Ghir_A10G014080	11.4153	4.0539	-1.30262	0.0207211	down	AT3G48560	chlorsulfuron/imidazolinone resistant 1
Ghir_A10G014300	0.0430985	0	-5.51469	0.0050382	down	AT5G67550	unknown protein; FUNCTIONS IN: molecular_function unknown; INVOLVED IN: biological_process unknown; LOCATED IN: endomembrane system; EXPRESSED IN: flower; EXPRESSED DURING: 4 anthesis; BEST Arabidopsis thaliana protein match is: unknown protein (TAIR:AT1G71110.1); Has 161 Blast hits to 154 proteins in 16 species: Archae - 0; Bacteria - 0; Metazoa - 0; Fungi - 0; Plants - 161; Viruses - 0; Other E…
Ghir_A10G014640	1.58189	0	-25.1555	5.39215e-32	down	AT3G59690	IQ-domain 13
Ghir_A10G014850	2.01744	0.331913	-2.38227	1.12191e-05	down	AT3G25500	formin homology 1
Ghir_A10G015010	3.44441	0.594999	-2.33229	0.0154535	down	AT2G38400	alanine:glyoxylate aminotransferase 3
Ghir_A10G015150	0.156927	0	-6.50241	1.75882e-05	down	AT2G30360	SOS3-interacting protein 4
Ghir_A10G015220	0.092695	0.007997	-3.19767	0.00255994	down	AT2G25010	Aminotransferase-like, plant mobile domain family protein
Ghir_A10G015570	0.730927	0.137397	-2.14865	0.00618443	down	AT5G01930	Glycosyl hydrolase superfamily protein
Ghir_A10G015620	0	0.099126	23.2213	8.05263e-18	up	AT3G58110	unknown protein; FUNCTIONS IN: molecular_function unknown; INVOLVED IN: biological_process unknown; LOCATED IN: cellular_component unknown; EXPRESSED IN: cultured cell; BEST Arabidopsis thaliana protein match is: unknown protein (TAIR:AT2G42370.1); Has 2534 Blast hits to 1905 proteins in 233 species: Archae - 11; Bacteria - 102; Metazoa - 890; Fungi - 241; Plants - 124; Viruses - 59; Other Eukary…
Ghir_A10G015650	0.198871	1.64737	3.24157	4.47962e-05	up	AT2G31130	unknown protein; Has 116 Blast hits to 113 proteins in 44 species: Archae - 0; Bacteria - 3; Metazoa - 21; Fungi - 2; Plants - 40; Viruses - 0; Other Eukaryotes - 50 (source: NCBI BLink).
Ghir_A10G015690	6.57392	13.1245	1.19248	0.00413667	up	AT2G31090	unknown protein; FUNCTIONS IN: molecular_function unknown; INVOLVED IN: biological_process unknown; LOCATED IN: endomembrane system; EXPRESSED IN: 24 plant structures; EXPRESSED DURING: 13 growth stages; BEST Arabidopsis thaliana protein match is: unknown protein (TAIR:AT2G20562.1); Has 70 Blast hits to 70 proteins in 13 species: Archae - 0; Bacteria - 0; Metazoa - 0; Fungi - 0; Plants - 70; Viru…
Ghir_A10G015790	5.13323	2.13953	-1.06388	0.0230567	down	AT5G63620	GroES-like zinc-binding alcohol dehydrogenase family protein
Ghir_A10G016020	0.187939	0.0137917	-3.54391	0.00656883	down	AT1G49780	plant U-box 26
Ghir_A10G016070	0.118439	0	-7.38549	0.000937395	down	AT5G58610	PHD finger transcription factor, putative
Ghir_A10G016070	0.255306	0	-8.48545	0.000813303	down	AT5G58610	PHD finger transcription factor, putative
Ghir_A10G016070	0.422135	0	-9.23464	1.32002e-06	down	AT5G58610	PHD finger transcription factor, putative
Ghir_A10G016110	11.3054	21.1647	1.10434	0.00335588	up	AT5G49800	Polyketide cyclase/dehydrase and lipid transport superfamily protein
Ghir_A10G016160	1.58489	0.612412	-1.16959	0.0230856	down	AT1G14440	homeobox protein 31
Ghir_A10G016310	2.54694	6.39593	1.52571	0.0323678	up	AT3G27250	unknown protein; BEST Arabidopsis thaliana protein match is: unknown protein (TAIR:AT5G40800.1); Has 104 Blast hits to 104 proteins in 13 species: Archae - 0; Bacteria - 0; Metazoa - 0; Fungi - 0; Plants - 104; Viruses - 0; Other Eukaryotes - 0 (source: NCBI BLink).
Ghir_A10G016750	0.340956	5.07496	4.0524	0.0171215	up	AT5G49020	protein arginine methyltransferase 4A
Ghir_A10G016800	0.108483	13.1148	7.01233	0.000165785	up	AT3G06890	unknown protein; Has 91 Blast hits to 91 proteins in 12 species: Archae - 0; Bacteria - 0; Metazoa - 0; Fungi - 0; Plants - 91; Viruses - 0; Other Eukaryotes - 0 (source: NCBI BLink).
Ghir_A10G017190	0.029615	0	-4.3106	0.0181102	down	AT5G49330	myb domain protein 111
Ghir_A10G017200	1.13192	0	-10.7616	0.00122116	down	AT5G26910	unknown protein; BEST Arabidopsis thaliana protein match is: unknown protein (TAIR:AT3G58650.1); Has 990 Blast hits to 447 proteins in 125 species: Archae - 0; Bacteria - 525; Metazoa - 80; Fungi - 59; Plants - 91; Viruses - 0; Other Eukaryotes - 235 (source: NCBI BLink).
Ghir_A10G017240	0	0.505104	8.9205	8.59442e-06	up	AT1G05385	photosystem II 11 kDa protein-related
Ghir_A10G017360	1.17969	0.0790507	-3.40829	2.73049e-06	down
Ghir_A10G017440	6.69959	1.80391	-1.70391	1.15292e-10	down	AT3G16910	acyl-activating enzyme 7
Ghir_A10G017600	0.296333	0	-8.14117	0.000230029	down	AT3G17040	high chlorophyll fluorescent 107
Ghir_A10G017690	0.127924	0.611902	2.40977	1.72856e-06	up	AT2G23540	GDSL-like Lipase/Acylhydrolase superfamily protein
Ghir_A10G018310	3.00861	5.75602	1.14642	0.0250249	up	AT2G40600	appr-1-p processing enzyme family protein
Ghir_A10G018430	0.087969	0	-5.81533	0.0236844	down	AT4G26900	HIS HF
Ghir_A10G018580	0.452207	0.126505	-1.63342	0.000362958	down	AT2G19260	RING/FYVE/PHD zinc finger superfamily protein
Ghir_A10G018900	0.127738	1.79726	3.81996	0.0088346	up	AT3G07910	FUNCTIONS IN: molecular_function unknown; INVOLVED IN: biological_process unknown; LOCATED IN: endomembrane system; EXPRESSED IN: 24 plant structures; EXPRESSED DURING: 15 growth stages; CONTAINS InterPro DOMAIN/s: Reactive oxygen species modulator 1 (InterPro:IPR018450); Has 192 Blast hits to 192 proteins in 80 species: Archae - 0; Bacteria - 0; Metazoa - 139; Fungi - 6; Plants - 39; Viruses - 0…
Ghir_A10G018990	3.62345	0.010222	-7.94326	5.76438e-07	down	AT1G49320	unknown seed protein like 1
Ghir_A10G019080	0.12284	0.662493	2.6689	0.0363057	up	AT3G61680	alpha/beta-Hydrolases superfamily protein
Ghir_A10G019130	0	0.298262	7.92519	0.000246872	up
Ghir_A10G019140	0.0236205	0.670521	4.96017	0.037896	up	AT1G40087	Plant transposase (Ptta/En/Spm family)
Ghir_A10G019390	0.075162	0.00901867	-3.0709	0.00544252	down	AT3G14470	NB-ARC domain-containing disease resistance protein
Ghir_A10G019420	0.068863	0	-7.21558	0.0389009	down
Ghir_A10G019460	2.76997	0.833305	-1.52722	0.000787202	down	AT2G38720	microtubule-associated protein 65-5
Ghir_A10G019760	0.112103	0	-6.30721	0.00713368	down	AT4G31500	cytochrome P450, family 83, subfamily B, polypeptide 1
Ghir_A10G019770	0.14243	0	-7.13004	0.000199304	down	AT4G31500	cytochrome P450, family 83, subfamily B, polypeptide 1
Ghir_A10G020430	0	0.003094	17.7365	6.27456e-06	up	AT5G04460	RING/U-box superfamily protein
Ghir_A10G020470	1.74574	0.695692	-1.11713	0.00832376	down	AT3G10490	NAC domain containing protein 52
Ghir_A10G020660	0.635601	0	-23.744	1.70838e-23	down	AT3G54870	Armadillo/beta-catenin repeat family protein / kinesin motor family protein
Ghir_A10G020870	4.63438	0.884309	-2.1808	0.00500386	down	AT3G53260	phenylalanine ammonia-lyase 2
Ghir_A10G020950	0.07705	0.359379	2.40654	0.0253723	up	AT5G17530	phosphoglucosamine mutase family protein
Ghir_A10G021010	0.083892	0	-5.75049	0.0268274	down
Ghir_A10G021180	1.15916	0	-9.10649	0.00140673	down	AT2G37060	nuclear factor Y, subunit B8
Ghir_A10G021690	0.0227565	7.57815	8.54235	0.00645227	up	AT5G04530	3-ketoacyl-CoA synthase 19
Ghir_A10G022250	0.137429	0	-7.73101	0.0228038	down	AT3G47570	Leucine-rich repeat protein kinase family protein
Ghir_A10G022330	8.82495	19.6999	1.34668	0.0265218	up	AT3G55420	unknown protein; Has 21 Blast hits to 21 proteins in 8 species: Archae - 0; Bacteria - 0; Metazoa - 0; Fungi - 0; Plants - 21; Viruses - 0; Other Eukaryotes - 0 (source: NCBI BLink).
Ghir_A10G022420	1.39545	0.312819	-1.95973	1.53945e-05	down	AT1G07570	Protein kinase superfamily protein
Ghir_A10G022620	0.76	0.187722	-1.79885	0.029572	down	AT3G55550	Concanavalin A-like lectin protein kinase family protein
Ghir_A10G022690	0.522189	0.0321287	-3.79598	1.2195e-05	down	AT5G06070	C2H2 and C2HC zinc fingers superfamily protein
Ghir_A10G022760	1.59949	0.345891	-2.00322	0.0030657	down	AT5G02070	Protein kinase family protein
Ghir_A10G023120	0.118678	9.2366	6.43661	0.0127787	up	AT5G05950	maternal effect embryo arrest 60
Ghir_A10G023150	0.001695	0.213449	6.70849	0.0341746	up	AT5G05930	guanylyl cyclase 1
Ghir_A10G023650	2.01258	0.065246	-4.712	0.00159055	down	AT2G39980	HXXXD-type acyl-transferase family protein
Ghir_A10G023790	1.82205	0.346212	-2.17615	0.00030417	down	AT3G47570	Leucine-rich repeat protein kinase family protein
Ghir_A10G023880	0.051536	0.274826	2.59452	0.016599	up	AT5G05690	Cytochrome P450 superfamily protein
Ghir_A10G023900	0.465712	0	-6.80018	0.0135184	down	AT2G40095	Alpha/beta hydrolase related protein
Ghir_A10G024050	0.805686	0.183658	-1.89688	0.00632886	down	AT3G26300	cytochrome P450, family 71, subfamily B, polypeptide 34
Ghir_A10G024160	2.0165	0.499293	-1.7927	0.00226043	down	AT5G05580	fatty acid desaturase 8
Ghir_A10G024170	0.030671	0	-5.29797	0.0090271	down	AT2G22410	SLOW GROWTH 1
Ghir_A10G024540	0.104739	0	-6.31734	0.0119318	down	AT2G16530	3-oxo-5-alpha-steroid 4-dehydrogenase family protein
Ghir_A10G024880	0.217893	0.00522367	-5.16071	0.000805173	down	AT3G23410	fatty alcohol oxidase 3
Ghir_A11G000090	0.895549	0.258553	-1.55982	0.0147734	down	AT5G62790	1-deoxy-D-xylulose 5-phosphate reductoisomerase
Ghir_A11G000170	0.164919	0.013592	-3.39794	0.0357808	down	AT2G01940	C2H2-like zinc finger protein
Ghir_A11G000180	0.421407	0.0158767	-4.44865	0.00709632	down	AT1G73480	alpha/beta-Hydrolases superfamily protein
Ghir_A11G000570	1.17989	0	-11.1696	1.51372e-05	down	AT1G48650	DEA(D/H)-box RNA helicase family protein
Ghir_A11G000590	0.0829355	0	-5.33093	0.0327765	down	AT2G28105	CONTAINS InterPro DOMAIN/s: Nucleic acid-binding, OB-fold-like (InterPro:IPR016027), Replication factor A, C-terminal (InterPro:IPR013955); Has 20 Blast hits to 20 proteins in 10 species: Archae - 0; Bacteria - 0; Metazoa - 2; Fungi - 0; Plants - 18; Viruses - 0; Other Eukaryotes - 0 (source: NCBI BLink).
Ghir_A11G000640	0.122402	0.468952	2.17537	0.0235432	up	AT3G18500	DNAse I-like superfamily protein
Ghir_A11G000750	0.581945	0.215662	-1.19052	0.033018	down	AT5G51550	EXORDIUM like 3
Ghir_A11G000810	0.300731	0	-8.85431	0.0229741	down	AT5G62230	ERECTA-like 1
Ghir_A11G000840	0.651932	0.041062	-3.64403	1.16443e-08	down	AT5G62220	glycosyltransferase 18
Ghir_A11G001110	2.66397	0.45183	-2.31293	0.00285079	down	AT4G33270	Transducin family protein / WD-40 repeat family protein
Ghir_A11G001160	0.751723	24.2316	5.27093	0.0238023	up	AT5G52510	SCARECROW-like 8
Ghir_A11G001320	0.130507	0	-5.80044	0.00608178	down	AT5G52900	unknown protein; Has 30201 Blast hits to 17322 proteins in 780 species: Archae - 12; Bacteria - 1396; Metazoa - 17338; Fungi - 3422; Plants - 5037; Viruses - 0; Other Eukaryotes - 2996 (source: NCBI BLink).
Ghir_A11G001440	0.121639	0.000846667	-4.58186	0.0242857	down	AT1G67190	F-box/RNI-like superfamily protein
Ghir_A11G001490	0	0.229542	26.6603	9.3324e-06	up	AT5G24270	Calcium-binding EF-hand family protein
Ghir_A11G001570	3.45968	1.43165	-1.05046	0.00204556	down	AT2G43950	chloroplast outer envelope protein 37
Ghir_A11G001660	0.319402	0	-7.43662	4.22391e-06	down	AT5G53730	Late embryogenesis abundant (LEA) hydroxyproline-rich glycoprotein family
Ghir_A11G001730	0.111319	0	-5.97577	0.00561432	down	AT1G33260	Protein kinase superfamily protein
Ghir_A11G002030	6.60228	1.7982	-1.67007	0.0167248	down	AT1G62750	Translation elongation factor EFG/EF2 protein
Ghir_A11G002370	6.60739	2.81142	-1.01598	0.0171845	down	AT1G64050	unknown protein; INVOLVED IN: biological_process unknown; LOCATED IN: cellular_component unknown; EXPRESSED IN: 22 plant structures; EXPRESSED DURING: 13 growth stages.
Ghir_A11G002510	0.161303	0	-5.89617	0.00797488	down
Ghir_A11G002610	20.9027	1.51002	-3.62407	0.00873614	down	AT2G45180	Bifunctional inhibitor/lipid-transfer protein/seed storage 2S albumin superfamily protein
Ghir_A11G002620	0.46741	0.0195063	-4.1187	0.00477405	down	AT4G12510	Bifunctional inhibitor/lipid-transfer protein/seed storage 2S albumin superfamily protein
Ghir_A11G002760	2.59212	0.819832	-1.44765	0.0124342	down	AT1G68580	agenet domain-containing protein / bromo-adjacent homology (BAH) domain-containing protein
Ghir_A11G002910	0.049673	0	-5.52354	0.00718912	down	AT5G04770	cationic amino acid transporter 6
Ghir_A11G002920	0.016795	1.17334	6.07986	0.001207	up	AT4G17615	calcineurin B-like protein 1
Ghir_A11G003890	0	0.240822	7.54884	0.0135924	up	AT3G03290	Adenine nucleotide alpha hydrolases-like superfamily protein
Ghir_A11G004700	0.26724	0	-7.28611	1.3942e-05	down	AT2G18060	vascular related NAC-domain protein 1
Ghir_A11G004790	0.717075	0	-9.81148	2.40281e-05	down	AT4G10770	oligopeptide transporter 7
Ghir_A11G004810	2.49513	0.30569	-2.81451	0.000472626	down	AT3G51290	Protein of unknown function (DUF630) ;Protein of unknown function (DUF632)
Ghir_A11G004820	0.183815	9.25173	5.88951	0.00443241	up	AT2G17790	VPS35 homolog A
Ghir_A11G005010	0.386502	0	-7.82728	0.00593446	down	AT4G36800	RUB1 conjugating enzyme 1
Ghir_A11G005370	0.119111	0.000388667	-5.9557	0.00641167	down	AT5G67320	WD-40 repeat family protein
Ghir_A11G005470	0.146654	0	-6.06434	0.00398045	down	AT2G22880	VQ motif-containing protein
Ghir_A11G005480	0.249471	0.022598	-3.11815	0.00407424	down	AT2G22850	basic leucine-zipper 6
Ghir_A11G005500	1.4639	0.238319	-2.37735	6.37739e-05	down	AT4G37790	Homeobox-leucine zipper protein family
Ghir_A11G005610	0.160229	0.007383	-3.8881	0.0043257	down
Ghir_A11G005680	0	0.0538217	5.08545	0.0268156	up	AT4G38070	basic helix-loop-helix (bHLH) DNA-binding superfamily protein
Ghir_A11G005820	0.836706	0	-23.5625	4.8885e-18	down	AT5G10290	leucine-rich repeat transmembrane protein kinase family protein
Ghir_A11G005840	0.0758755	0	-5.32518	0.0053139	down	AT1G34370	C2H2 and C2HC zinc fingers superfamily protein
Ghir_A11G006240	10.1886	3.45658	-1.34474	0.0446533	down	AT5G09760	Plant invertase/pectin methylesterase inhibitor superfamily
Ghir_A11G006250	2.61062	0.796197	-1.48574	0.00499546	down	AT1G77120	alcohol dehydrogenase 1
Ghir_A11G006520	0.0607795	0	-4.80215	0.00347772	down
Ghir_A11G006770	0.22864	0.031953	-2.54496	0.00611983	down	AT2G42920	Pentatricopeptide repeat (PPR-like) superfamily protein
Ghir_A11G006910	30.2006	62.662	1.26324	0.00108319	up	AT5G46860	Syntaxin/t-SNARE family protein
Ghir_A11G006930	2.69481	0.0689673	-5.0618	2.36296e-10	down	AT1G27430	GYF domain-containing protein
Ghir_A11G007480	0.947805	0.00732067	-6.40719	4.28075e-05	down	AT5G15020	SIN3-like 2
Ghir_A11G008280	4.36823	1.61186	-1.24012	0.00241599	down	AT3G60380	FUNCTIONS IN: molecular_function unknown; INVOLVED IN: biological_process unknown; LOCATED IN: cellular_component unknown; EXPRESSED IN: 24 plant structures; EXPRESSED DURING: 13 growth stages; BEST Arabidopsis thaliana protein match is: hydroxyproline-rich glycoprotein family protein (TAIR:AT4G16790.1); Has 6102 Blast hits to 3981 proteins in 424 species: Archae - 6; Bacteria - 372; Metazoa - 26…
Ghir_A11G008290	0.63037	0.0513407	-3.32764	0.0197599	down	AT3G60390	homeobox-leucine zipper protein 3
Ghir_A11G008580	1.1788	0.304871	-1.70812	0.030081	down	AT1G63370	Flavin-binding monooxygenase family protein
Ghir_A11G008590	0.102508	0.00931333	-3.26943	0.00572856	down	AT3G60670	PLATZ transcription factor family protein
Ghir_A11G008750	0.0528195	0	-4.28008	0.0442271	down	AT3G60810	unknown protein; CONTAINS InterPro DOMAIN/s: Protein of unknown function DUF1499 (InterPro:IPR010865); Has 444 Blast hits to 444 proteins in 143 species: Archae - 0; Bacteria - 268; Metazoa - 0; Fungi - 0; Plants - 51; Viruses - 0; Other Eukaryotes - 125 (source: NCBI BLink).
Ghir_A11G008860	2.29137	0.648107	-1.59486	0.000528905	down	AT3G60900	FASCICLIN-like arabinogalactan-protein 10
Ghir_A11G008870	0.853366	0	-9.41575	0.000226718	down	AT2G45480	growth-regulating factor 9
Ghir_A11G009040	0.191596	0.0173223	-3.08555	0.0225289	down	AT4G00230	xylem serine peptidase 1
Ghir_A11G009170	0	1.01178	24.3861	4.95959e-11	up	AT2G45720	ARM repeat superfamily protein
Ghir_A11G009200	0.0670605	0	-5.53029	0.000457875	down	AT3G61060	phloem protein 2-A13
Ghir_A11G009210	0.327519	0.030606	-3.0827	0.0246624	down	AT4G00750	S-adenosyl-L-methionine-dependent methyltransferases superfamily protein
Ghir_A11G009500	10.188	2.12991	-2.04853	1.0829e-06	down	AT2G45850	AT hook motif DNA-binding family protein
Ghir_A11G009610	0.465927	0	-22.8127	2.32448e-14	down	AT1G01650	SIGNAL PEPTidE PEPTidASE-LIKE 4
Ghir_A11G009670	0.635115	0.201603	-1.42238	0.0334521	down	AT4G29910	origin recognition complex protein 5
Ghir_A11G009730	0.059762	0	-5.85575	0.0290622	down	AT4G00335	RING-H2 finger B1A
Ghir_A11G009810	0.062393	0.00805633	-2.74163	0.0301832	down	AT3G61460	brassinosteroid-responsive RING-H2
Ghir_A11G010230	0.2456	0.0133243	-3.85471	0.00145609	down	AT2G46340	SPA (suppressor of phyA-105) protein family
Ghir_A11G010490	0	0.204397	22.1369	3.45832e-17	up	AT4G00980	zinc knuckle (CCHC-type) family protein
Ghir_A11G010670	0.381375	0.0433863	-2.88621	0.00666132	down	AT1G01200	RAB GTPase homolog A3
Ghir_A11G010760	0.525795	0.102801	-2.11924	0.0151634	down	AT2G46710	Rho GTPase activating protein with PAK-box/P21-Rho-binding domain
Ghir_A11G010970	0	0.028245	5.6299	0.0257527	up	AT2G46820	photosystem I P subunit
Ghir_A11G011000	1.18776	0.203998	-2.28155	0.0190268	down	AT3G61960	Protein kinase superfamily protein
Ghir_A11G011050	0.0003105	0.0841577	6.32651	0.0150267	up	AT3G49530	NAC domain containing protein 62
Ghir_A11G011100	0.438778	0.121402	-1.72968	0.0128638	down	AT2G46910	Plastid-lipid associated protein PAP / fibrillin family protein
Ghir_A11G011300	0.186365	0	-6.24723	0.0213505	down	AT1G02360	Chitinase family protein
Ghir_A11G011490	0.366858	0.0591247	-2.42059	0.0427325	down	AT1G02460	Pectin lyase-like superfamily protein
Ghir_A11G011520	1.15105	0.2598	-1.9381	0.00418416	down	AT1G09390	GDSL-like Lipase/Acylhydrolase superfamily protein
Ghir_A11G011600	0.11042	0	-6.41116	0.00203056	down	AT1G02380	unknown protein; BEST Arabidopsis thaliana protein match is: unknown protein (TAIR:AT4G01960.1); Has 66 Blast hits to 66 proteins in 11 species: Archae - 0; Bacteria - 0; Metazoa - 0; Fungi - 0; Plants - 66; Viruses - 0; Other Eukaryotes - 0 (source: NCBI BLink).
Ghir_A11G011610	0.901103	0.0984197	-3.05117	0.00039959	down	AT2G47260	WRKY DNA-binding protein 23
Ghir_A11G011730	0	0.654709	9.0157	1.24514e-06	up	AT2G16760	Calcium-dependent phosphotriesterase superfamily protein
Ghir_A11G011740	6.14473	0.124955	-5.43907	8.64443e-13	down	AT2G16760	Calcium-dependent phosphotriesterase superfamily protein
Ghir_A11G011770	0	0.123765	8.03528	0.031174	up	AT4G02030	Vps51/Vps67 family (components of vesicular transport) protein
Ghir_A11G011950	0.068943	0	-5.70698	0.00523937	down	AT1G67030	zinc finger protein 6
Ghir_A11G012270	4.27354	0.869138	-2.07412	0.00446125	down	AT1G02840	RNA-binding (RRM/RBD/RNP motifs) family protein
Ghir_A11G012610	0.023498	0	-4.02341	0.0436983	down	AT2G47930	arabinogalactan protein 26
Ghir_A11G012620	0.167098	0.00522567	-4.43276	0.0048013	down	AT1G59750	auxin response factor 1
Ghir_A11G012650	0.0360895	0	-5.26466	0.0135472	down	AT4G03140	NAD(P)-binding Rossmann-fold superfamily protein
Ghir_A11G012700	0.176374	0	-6.46684	0.00819772	down	AT1G04420	NAD(P)-linked oxidoreductase superfamily protein
Ghir_A11G012750	0.239923	0.041121	-2.30698	0.037102	down	AT2G48010	receptor-like kinase in in flowers 3
Ghir_A11G013080	1.11735	0	-23.9097	1.14399e-09	down	AT3G63120	cyclin p1;1
Ghir_A11G013100	0	0.660675	29.9191	8.44268e-05	up	AT3G63200	PATATIN-like protein 9
Ghir_A11G013200	0.0197085	0.435376	4.74654	0.0298618	up	AT1G03120	responsive to abscisic acid 28
Ghir_A11G013490	1.7231	0	-25.8251	5.20488e-24	down	AT3G54660	glutathione reductase
Ghir_A11G013660	0.235043	1.36911	2.7042	0.00114411	up	AT3G58170	BET1P/SFT1P-like protein 14A
Ghir_A11G013990	0	0.0759083	7.50083	0.000458509	up	AT2G20470	AGC (cAMP-dependent, cGMP-dependent and protein kinase C) kinase family protein
Ghir_A11G014100	3.66066	1.1985	-1.39349	0.00349716	down	AT1G04030	unknown protein; BEST Arabidopsis thaliana protein match is: unknown protein (TAIR:AT5G44040.1); Has 1835 Blast hits to 1511 proteins in 238 species: Archae - 7; Bacteria - 164; Metazoa - 377; Fungi - 135; Plants - 187; Viruses - 22; Other Eukaryotes - 943 (source: NCBI BLink).
Ghir_A11G014180	0.053874	0	-6.28657	0.0278054	down	AT1G04080	Tetratricopeptide repeat (TPR)-like superfamily protein
Ghir_A11G014210	0.117709	2.27594	4.46164	6.46152e-07	up	AT1G04090	Plant protein of unknown function (DUF946)
Ghir_A11G014390	0.373771	0.00536967	-5.7246	0.025488	down	AT2G20180	phytochrome interacting factor 3-like 5
Ghir_A11G014480	0.569748	5.30095	3.44459	0.000257302	up	AT3G07030	Alba DNA/RNA-binding protein
Ghir_A11G014490	0.504912	0.0625863	-2.73043	0.0389127	down	AT5G48850	Tetratricopeptide repeat (TPR)-like superfamily protein
Ghir_A11G014680	0.60168	0.114387	-2.1697	0.000110329	down	AT5G48800	Phototropic-responsive NPH3 family protein
Ghir_A11G014840	0.0357255	0	-4.61767	0.0111824	down	AT4G13040	Integrase-type DNA-binding superfamily protein
Ghir_A11G014880	0.170223	0	-5.73253	0.00436454	down	AT3G07250	nuclear transport factor 2 (NTF2) family protein / RNA recognition motif (RRM)-containing protein
Ghir_A11G015090	42.301	78.0465	1.09343	0.00629871	up	AT3G25290	Auxin-responsive family protein
Ghir_A11G015430	2.54768	0	-26.0631	1.00929e-36	down	AT3G07560	peroxin 13
Ghir_A11G015440	0.83561	0.331111	-1.11579	6.802e-05	down	AT3G07565	Protein of unknown function (DUF3755)
Ghir_A11G015540	0.156745	0	-5.46452	0.022247	down	AT2G04039	unknown protein; FUNCTIONS IN: molecular_function unknown; LOCATED IN: chloroplast; EXPRESSED IN: 21 plant structures; EXPRESSED DURING: 13 growth stages; CONTAINS InterPro DOMAIN/s: Protein of unknown function DUF2996 (InterPro:IPR021374); Has 159 Blast hits to 159 proteins in 52 species: Archae - 0; Bacteria - 76; Metazoa - 0; Fungi - 0; Plants - 38; Viruses - 0; Other Eukaryotes - 45 (source: …
Ghir_A11G015640	0.112538	0	-6.45038	9.65705e-05	down	AT3G50660	Cytochrome P450 superfamily protein
Ghir_A11G015650	0.035541	0	-5.29136	0.00201618	down	AT2G04160	Subtilisin-like serine endopeptidase family protein
Ghir_A11G015820	0	0.0960333	7.17762	0.00222518	up	AT3G12700	Eukaryotic aspartyl protease family protein
Ghir_A11G015880	0.00236	0.07821	5.29266	0.00489298	up	AT2G05160	CCCH-type zinc fingerfamily protein with RNA-binding domain
Ghir_A11G016560	19.9973	5.50954	-1.66533	0.00011648	down	AT3G22200	Pyridoxal phosphate (PLP)-dependent transferases superfamily protein
Ghir_A11G016710	11.5987	2.93519	-1.77223	0.0054484	down	AT3G51550	Malectin/receptor-like protein kinase family protein
Ghir_A11G016840	0.061496	0.445239	3.07837	0.0217062	up	AT3G02300	Regulator of chromosome condensation (RCC1) family protein
Ghir_A11G017290	2.8754	8.85222	1.83698	9.68638e-05	up	AT5G16110	unknown protein; FUNCTIONS IN: molecular_function unknown; INVOLVED IN: biological_process unknown; LOCATED IN: chloroplast; EXPRESSED IN: 24 plant structures; EXPRESSED DURING: 15 growth stages; BEST Arabidopsis thaliana protein match is: unknown protein (TAIR:AT3G02555.1); Has 133 Blast hits to 133 proteins in 18 species: Archae - 0; Bacteria - 0; Metazoa - 0; Fungi - 0; Plants - 133; Viruses -…
Ghir_A11G017540	0.851291	0.040264	-4.03287	9.69537e-06	down	AT3G18270	cytochrome P450, family 77, subfamily A, polypeptide 5 pseudogene
Ghir_A11G017830	1.46029	0.0702817	-4.11777	3.59657e-05	down	AT5G37630	ARM repeat superfamily protein
Ghir_A11G018080	0.0531845	1.02824	4.46389	0.0112653	up	AT3G51390	DHHC-type zinc finger family protein
Ghir_A11G018290	0.150127	0.008176	-4.23454	0.0192531	down	AT4G35920	PLAC8 family protein
Ghir_A11G018420	0.127579	0	-6.27236	0.000930891	down	AT4G38660	Pathogenesis-related thaumatin superfamily protein
Ghir_A11G018700	0.426494	1.09091	1.52632	0.0236745	up	AT5G10980	Histone superfamily protein
Ghir_A11G019160	0.0731275	0	-5.47443	0.0245335	down	AT2G18160	basic leucine-zipper 2
Ghir_A11G019490	0.344987	0.0739933	-2.00026	0.00478134	down	AT3G50660	Cytochrome P450 superfamily protein
Ghir_A11G019560	1.6019	0.53911	-1.34933	1.93868e-05	down	AT5G49610	F-box family protein
Ghir_A11G019670	0.219638	0	-8.03346	0.000431788	down	AT4G36730	G-box binding factor 1
Ghir_A11G019730	0.14704	0	-7.09195	0.00343041	down	AT4G36790	Major facilitator superfamily protein
Ghir_A11G019860	0	0.0734187	5.78841	0.0130215	up	AT5G66580	unknown protein; FUNCTIONS IN: molecular_function unknown; INVOLVED IN: N-terminal protein myristoylation; LOCATED IN: cellular_component unknown; BEST Arabidopsis thaliana protein match is: unknown protein (TAIR:AT3G50800.1); Has 1807 Blast hits to 1807 proteins in 277 species: Archae - 0; Bacteria - 0; Metazoa - 736; Fungi - 347; Plants - 385; Viruses - 0; Other Eukaryotes - 339 (source: NCBI B…
Ghir_A11G019920	0	0.0996317	6.77087	0.0418317	up	AT4G37210	Tetratricopeptide repeat (TPR)-like superfamily protein
Ghir_A11G020010	0	0.0226933	5.313	0.0144841	up	AT3G18990	AP2/B3-like transcriptional factor family protein
Ghir_A11G020390	0	0.117896	7.34584	0.0116783	up	AT4G29140	MATE efflux family protein
Ghir_A11G020530	1.8231	0	-11.8847	7.77585e-06	down	AT5G67100	DNA-directed DNA polymerases
Ghir_A11G020560	0.0937245	0.447091	2.4611	0.00678316	up	AT1G45180	RING/U-box superfamily protein
Ghir_A11G020640	0.0796645	0	-5.52369	0.0039466	down	AT5G67150	HXXXD-type acyl-transferase family protein
Ghir_A11G020680	0.199594	0.010538	-3.54082	0.00219541	down	AT2G42240	RNA-binding (RRM/RBD/RNP motifs) family protein
Ghir_A11G021470	5.4033	2.12053	-1.14475	0.000320963	down	AT5G64970	Mitochondrial substrate carrier family protein
Ghir_A11G021520	0.716714	0.001424	-7.50001	0.0296919	down	AT4G39920	C-CAP/cofactor C-like domain-containing protein
Ghir_A11G021660	0.813577	0.0268967	-4.58891	0.0353556	down	AT2G22420	Peroxidase superfamily protein
Ghir_A11G021860	0.788643	0	-8.30286	5.16511e-07	down	AT2G22475	GRAM domain family protein
Ghir_A11G021940	0.008915	0.932709	6.79527	0.000284187	up	AT4G02210	unknown protein; FUNCTIONS IN: molecular_function unknown; INVOLVED IN: biological_process unknown; LOCATED IN: cellular_component unknown; EXPRESSED IN: 22 plant structures; EXPRESSED DURING: 13 growth stages; BEST Arabidopsis thaliana protein match is: unknown protein (TAIR:AT2G24960.2).
Ghir_A11G021980	3.35218	0	-29.9108	7.0199e-24	down	AT5G10470	kinesin like protein for actin based chloroplast movement 1
Ghir_A11G022120	8.04357	1.40698	-2.3069	2.01396e-06	down	AT4G37970	cinnamyl alcohol dehydrogenase 6
Ghir_A11G022350	0.201793	0	-7.56717	0.0362175	down	AT3G49650	P-loop containing nucleoside triphosphate hydrolases superfamily protein
Ghir_A11G022530	0	0.0612503	6.49124	0.01844	up	AT3G49690	myb domain protein 84
Ghir_A11G022600	0.814145	0.247474	-1.49915	0.00170708	down	AT4G37750	Integrase-type DNA-binding superfamily protein
Ghir_A11G022780	0.16798	0	-5.97303	0.00031823	down	AT2G32190	unknown protein; BEST Arabidopsis thaliana protein match is: unknown protein (TAIR:AT2G32210.1); Has 218 Blast hits to 218 proteins in 24 species: Archae - 0; Bacteria - 0; Metazoa - 0; Fungi - 16; Plants - 202; Viruses - 0; Other Eukaryotes - 0 (source: NCBI BLink).
Ghir_A11G022810	0	0.0255567	6.22777	0.0169356	up	AT5G67570	Tetratricopeptide repeat (TPR)-like superfamily protein
Ghir_A11G023020	6.76262	0.843635	-2.80477	6.50134e-05	down	AT3G49940	LOB domain-containing protein 38
Ghir_A11G023240	0.360093	0	-8.48417	0.00169174	down	AT4G37440	unknown protein; LOCATED IN: cellular_component unknown; BEST Arabidopsis thaliana protein match is: unknown protein (TAIR:AT3G50040.1); Has 121 Blast hits to 117 proteins in 32 species: Archae - 0; Bacteria - 6; Metazoa - 13; Fungi - 5; Plants - 66; Viruses - 0; Other Eukaryotes - 31 (source: NCBI BLink).
Ghir_A11G023380	0.392585	0.053054	-2.7211	0.00540898	down	AT5G24010	Protein kinase superfamily protein
Ghir_A11G023400	0.300097	0	-7.54617	0.0173892	down	AT2G23250	UDP-glucosyl transferase 84B2
Ghir_A11G023450	0.0050575	0.166242	4.85037	0.0473881	up	AT1G16570	UDP-Glycosyltransferase superfamily protein
Ghir_A11G023730	0.612837	0.165389	-1.67704	0.0217783	down	AT3G18730	tetratricopeptide repeat (TPR)-containing protein
Ghir_A11G023840	12.3494	2.30974	-2.20234	0.0440566	down	AT5G52860	ABC-2 type transporter family protein
Ghir_A11G023980	0.0662215	0.581988	3.40657	0.00162107	up
Ghir_A11G024130	0	0.0380987	5.58734	0.0388102	up	AT1G31350	KAR-UP F-box 1
Ghir_A11G024180	1.54821	0.258923	-2.29156	1.08538e-15	down	AT5G64620	cell wall / vacuolar inhibitor of fructosidase 2
Ghir_A11G024820	1.60524	0.630616	-1.12413	0.0058029	down	AT5G39660	cycling DOF factor 2
Ghir_A11G025370	1.80972	3.28518	1.07193	0.00769282	up	AT3G03800	syntaxin of plants 131
Ghir_A11G025620	0	1.47468	12.198	6.5387e-12	up	AT5G48385	FRIGidA-like protein
Ghir_A11G026450	0.0688335	0	-22.4662	2.15314e-06	down	AT1G64790	ILITYHIA
Ghir_A11G026560	0.188167	0.0372823	-2.11936	0.0333515	down	AT3G14470	NB-ARC domain-containing disease resistance protein
Ghir_A11G026590	3.15431	1.32956	-1.03566	0.0410457	down	AT1G08590	Leucine-rich receptor-like protein kinase family protein
Ghir_A11G026700	0.096329	0	-7.21275	0.00151667	down	AT3G04470	Ankyrin repeat family protein
Ghir_A11G026820	0	0.238076	24.0073	1.46991e-10	up	AT1G08620	Transcription factor jumonji (jmj) family protein / zinc finger (C5HC2 type) family protein
Ghir_A11G027080	1.73139	0.635368	-1.23991	0.0188367	down	AT1G54460	TPX2 (targeting protein for Xklp2) protein family
Ghir_A11G027490	0.005088	0	-15.0918	0.00751243	down	AT1G54510	NIMA-related serine/threonine kinase 1
Ghir_A11G027540	0.320675	0.0153643	-4.13123	0.0227081	down	AT5G11880	Pyridoxal-dependent decarboxylase family protein
Ghir_A11G027850	0	0.000488667	18.9228	0.0317171	up	AT1G54610	Protein kinase superfamily protein
Ghir_A11G028010	2.49256	0.942055	-1.19511	0.0126255	down	AT1G54385	ARM repeat superfamily protein
Ghir_A11G028070	1.58711	3.8734	1.46152	0.0137234	up	AT5G18170	glutamate dehydrogenase 1
Ghir_A11G028240	0	0.0817673	6.87947	0.0395801	up
Ghir_A11G028330	0.482332	0.132802	-1.62415	0.00432395	down	AT1G09570	phytochrome A
Ghir_A11G028500	1.55469	0.254874	-2.44369	0.00703234	down	AT3G05200	RING/U-box superfamily protein
Ghir_A11G028690	0.056407	0.190334	1.98349	0.0164482	up	AT3G05345	Chaperone DnaJ-domain superfamily protein
Ghir_A11G029620	0.091994	0.00827967	-2.91874	0.021809	down	AT1G23380	KNOTTED1-like homeobox gene 6
Ghir_A11G029870	12.0042	5.11983	-1.02748	0.0184773	down	AT1G09460	Carbohydrate-binding X8 domain superfamily protein
Ghir_A11G030250	0.49253	0.0275947	-3.83235	6.3215e-09	down	AT5G60900	receptor-like protein kinase 1
Ghir_A11G030280	0.986888	0.228734	-1.90469	0.0114627	down	AT1G50660	unknown protein; INVOLVED IN: biological_process unknown; LOCATED IN: chloroplast; EXPRESSED IN: 22 plant structures; EXPRESSED DURING: 13 growth stages; BEST Arabidopsis thaliana protein match is: unknown protein (TAIR:AT3G20350.1); Has 21445 Blast hits to 15134 proteins in 1325 species: Archae - 461; Bacteria - 2309; Metazoa - 11052; Fungi - 1737; Plants - 1035; Viruses - 42; Other Eukaryotes -…
Ghir_A11G030350	0.394888	0.0820397	-2.00744	0.00307142	down	AT5G36930	Disease resistance protein (TIR-NBS-LRR class) family
Ghir_A11G030700	0.665995	0.151863	-1.90405	0.0110481	down	AT1G69550	disease resistance protein (TIR-NBS-LRR class)
Ghir_A11G030710	0.370387	0	-6.008	0.0125655	down	AT5G36930	Disease resistance protein (TIR-NBS-LRR class) family
Ghir_A11G031080	17.4946	7.12819	-1.08777	0.0255472	down	AT1G53050	Protein kinase superfamily protein
Ghir_A11G031120	0.201309	0.0345913	-2.26269	0.00115684	down	AT4G27220	NB-ARC domain-containing disease resistance protein
Ghir_A11G031650	2.44871	4.48755	1.08639	0.00419637	up	AT3G14770	Nodulin MtN3 family protein
Ghir_A11G031900	1.16	0	-35.7963	2.63749e-08	down	AT2G44260	Plant protein of unknown function (DUF946)
Ghir_A11G031910	0.172858	0.00182	-5.80909	0.0120302	down	AT1G56170	nuclear factor Y, subunit C2
Ghir_A11G032120	0.378919	0.0131077	-4.62007	0.02422	down	AT1G09130	ATP-dependent caseinolytic (Clp) protease/crotonase family protein
Ghir_A11G032450	0.0827755	0.00926533	-2.7487	0.0234603	down	AT5G17680	disease resistance protein (TIR-NBS-LRR class), putative
Ghir_A11G032600	0.532633	0	-9.24319	0.0107124	down	AT5G28150	Plant protein of unknown function (DUF868)
Ghir_A11G032740	0.0964265	0	-5.24307	0.00220625	down	AT2G34320	Polynucleotidyl transferase, ribonuclease H-like superfamily protein
Ghir_A11G033480	5.23959	2.09476	-1.11148	0.00184875	down	AT2G41130	basic helix-loop-helix (bHLH) DNA-binding superfamily protein
Ghir_A11G033580	1.13347	0.0335067	-4.77133	0.00400998	down	AT3G10250	Plant protein 1589 of unknown function
Ghir_A11G034040	0	0.142611	22.7338	0.000161366	up	AT3G14470	NB-ARC domain-containing disease resistance protein
Ghir_A11G034050	0.400954	0.0899827	-1.91101	0.0212275	down	AT3G14470	NB-ARC domain-containing disease resistance protein
Ghir_A11G034400	0.0667175	0	-6.54695	0.00641656	down	AT3G14470	NB-ARC domain-containing disease resistance protein
Ghir_A11G034610	17.4656	1.89969	-2.99558	0.0423067	down	AT1G68560	alpha-xylosidase 1
Ghir_A11G034820	0.147728	0	-7.20823	0.0251113	down	AT3G10030	aspartate/glutamate/uridylate kinase family protein
Ghir_A11G035130	0.203634	1.42617	3.05143	0.016338	up	AT5G02810	pseudo-response regulator 7
Ghir_A11G035270	3.37229	6.27558	1.07996	0.0288101	up	AT5G02280	SNARE-like superfamily protein
Ghir_A11G035400	0.351139	0	-7.16242	2.63428e-06	down	AT5G05960	Bifunctional inhibitor/lipid-transfer protein/seed storage 2S albumin superfamily protein
Ghir_A11G035510	0.509319	0.033943	-3.34336	0.000967856	down	AT4G00430	plasma membrane intrinsic protein 1;4
Ghir_A11G035580	0.205918	0	-7.09732	5.94246e-07	down	AT5G01260	Carbohydrate-binding-like fold
Ghir_A11G035810	1.33248	0.115432	-3.2999	0.0232461	down	AT1G45688	unknown protein; FUNCTIONS IN: molecular_function unknown; INVOLVED IN: biological_process unknown; LOCATED IN: plasma membrane; EXPRESSED IN: 22 plant structures; EXPRESSED DURING: 13 growth stages; BEST Arabidopsis thaliana protein match is: unknown protein (TAIR:AT5G42860.1); Has 258 Blast hits to 242 proteins in 39 species: Archae - 0; Bacteria - 11; Metazoa - 10; Fungi - 14; Plants - 198; Vi…
Ghir_A11G035820	0.103191	0.00598933	-3.41782	0.0373498	down	AT4G36950	mitogen-activated protein kinase kinase kinase 21
Ghir_A11G036010	0.359397	0	-7.47932	0.00151845	down	AT3G10140	RECA homolog 3
Ghir_A12G000360	0.190359	0	-7.74037	0.000112685	down	AT3G63240	DNAse I-like superfamily protein
Ghir_A12G000470	2.56914	0.469005	-2.24126	0.000748612	down	AT3G63200	PATATIN-like protein 9
Ghir_A12G000630	0.0241305	4.55553	7.33441	0.019983	up	AT4G02980	endoplasmic reticulum auxin binding protein 1
Ghir_A12G000930	0.419195	0	-9.84199	1.1052e-06	down	AT3G62900	CW-type Zinc Finger
Ghir_A12G001020	0.106034	0	-6.06427	0.00336404	down	AT5G27690	Heavy metal transport/detoxification superfamily protein
Ghir_A12G001330	0.241644	0	-8.75071	0.038016	down	AT4G35290	glutamate receptor 2
Ghir_A12G001420	0.434482	0.011002	-4.74143	1.29409e-05	down	AT5G02600	Heavy metal transport/detoxification superfamily protein
Ghir_A12G001430	2.47963	0.788318	-1.43684	0.000842155	down	AT5G64080	Bifunctional inhibitor/lipid-transfer protein/seed storage 2S albumin superfamily protein
Ghir_A12G001770	13.9815	0	-28.0886	4.00823e-19	down	AT5G09590	mitochondrial HSO70 2
Ghir_A12G001790	2.46852	0.00796567	-7.77512	0.00400266	down	AT1G11755	Undecaprenyl pyrophosphate synthetase family protein
Ghir_A12G001880	0.050322	0.151325	1.78664	0.0167339	up	AT1G50000	methyltransferases
Ghir_A12G002270	0.217489	0	-8.49437	0.000276344	down	AT2G15530	RING/U-box superfamily protein
Ghir_A12G002270	0.208616	0.00443833	-5.1429	0.0192746	down	AT2G15530	RING/U-box superfamily protein
Ghir_A12G002380	0.0836385	0.00641767	-3.2315	0.0235511	down	AT3G19260	LAG1 homologue 2
Ghir_A12G002630	0.014139	0.118868	3.21922	0.046039	up	AT2G15900	Phox-associated domain;Phox-like;Sorting nexin, C-terminal
Ghir_A12G002820	1.08428	0.01026	-6.20974	0.000278105	down	AT5G53070	Ribosomal protein L9/RNase H1
Ghir_A12G002900	0.207083	0	-5.79861	0.0132024	down	AT2G21620	Adenine nucleotide alpha hydrolases-like superfamily protein
Ghir_A12G003200	0	0.270306	8.68451	0.000494838	up	AT1G10780	F-box/RNI-like superfamily protein
Ghir_A12G003630	0.341664	3.75346	3.6922	0.00819962	up	AT4G35140	Transducin/WD40 repeat-like superfamily protein
Ghir_A12G003750	0.0149125	0.54146	5.18067	0.0236844	up	AT4G35030	Protein kinase superfamily protein
Ghir_A12G003760	0.263117	0	-5.78408	0.00662446	down	AT5G53300	ubiquitin-conjugating enzyme 10
Ghir_A12G003790	0.0273695	0	-5.01174	0.020177	down	AT2G16730	glycosyl hydrolase family 35 protein
Ghir_A12G003910	0.179739	0.0372143	-1.88581	0.00125695	down	AT4G34940	armadillo repeat only 1
Ghir_A12G004080	0.131894	0.00871233	-3.58872	0.00129957	down	AT4G38810	Calcium-binding EF-hand family protein
Ghir_A12G004210	1.02233	0.0967337	-3.18268	0.00309994	down	AT2G21385	unknown protein; FUNCTIONS IN: molecular_function unknown; INVOLVED IN: biological_process unknown; LOCATED IN: chloroplast, chloroplast envelope; EXPRESSED IN: 22 plant structures; EXPRESSED DURING: 13 growth stages; Has 49 Blast hits to 49 proteins in 20 species: Archae - 0; Bacteria - 0; Metazoa - 0; Fungi - 0; Plants - 44; Viruses - 0; Other Eukaryotes - 5 (source: NCBI BLink).
Ghir_A12G004260	2.05732	0.565084	-1.65695	4.58272e-07	down	AT4G34610	BEL1-like homeodomain 6
Ghir_A12G004300	0.0555015	0.00305867	-3.72469	0.00174385	down	AT1G07650	Leucine-rich repeat transmembrane protein kinase
Ghir_A12G004510	0	0.016047	18.1937	3.60524e-06	up	AT1G33980	Smg-4/UPF3 family protein
Ghir_A12G004990	2.26071	0.708977	-1.46907	0.0168914	down	AT4G20070	allantoate amidohydrolase
Ghir_A12G005220	0	0.077242	7.39719	0.00243219	up	AT1G59640	BIG PETAL P
Ghir_A12G005290	0.0002775	0	-15.2126	0.00103619	down	AT1G60070	Adaptor protein complex AP-1, gamma subunit
Ghir_A12G005460	1.68768	0.422488	-1.76754	0.0233703	down	AT1G67080	abscisic acid (aba)-deficient 4
Ghir_A12G005620	0	0.904326	10.4779	0.00250405	up	AT3G57390	AGAMOUS-like 18
Ghir_A12G006120	0.025288	0	-4.05527	0.0292422	down	AT5G66190	ferredoxin-NADP(+)-oxidoreductase 1
Ghir_A12G006170	3.59873	0.574206	-2.44078	0.000351215	down	AT5G66230	Chalcone-flavanone isomerase family protein
Ghir_A12G006200	0.966312	0	-23.6512	1.39834e-09	down	AT2G18030	Peptide methionine sulfoxide reductase family protein
Ghir_A12G006260	2.31103	4.5202	1.16446	0.00713306	up	AT5G08391	Protein of unknown function (DUF 3339)
Ghir_A12G006360	0	0.0614247	6.33152	0.00711925	up	AT3G54340	K-box region and MADS-box transcription factor family protein
Ghir_A12G006400	0.732839	0	-8.82858	8.95727e-10	down	AT2G18170	MAP kinase 7
Ghir_A12G006610	0.113082	0.00864667	-3.17667	0.0210056	down	AT2G18300	basic helix-loop-helix (bHLH) DNA-binding superfamily protein
Ghir_A12G006670	1.77592	0	-10.1123	0.00291775	down	AT5G66770	GRAS family transcription factor
Ghir_A12G006750	0.475754	0.006791	-5.42322	0.0110763	down	AT4G36730	G-box binding factor 1
Ghir_A12G007150	0.721028	0.131892	-2.15782	0.00109501	down	AT1G02130	RAS 5
Ghir_A12G007530	0.351442	0.072879	-2.00856	0.0356113	down	AT3G23880	F-box and associated interaction domains-containing protein
Ghir_A12G007550	4.12859	1.54907	-1.1996	0.0235467	down	AT4G36970	Remorin family protein
Ghir_A12G007580	17.2835	31.0631	1.04433	0.0356241	up	AT5G67070	ralf-like 34
Ghir_A12G007700	0.193602	0.0130097	-3.66649	0.0475545	down	AT5G67210	Protein of unknown function (DUF579)
Ghir_A12G008000	0.171947	0	-6.80225	0.000269603	down	AT4G37370	cytochrome P450, family 81, subfamily D, polypeptide 8
Ghir_A12G008230	0.442128	0	-23.8521	4.47364e-18	down	AT3G10550	Myotubularin-like phosphatases II superfamily
Ghir_A12G008500	0.514672	0	-8.12167	0.0008391	down	AT5G13870	xyloglucan endotransglucosylase/hydrolase 5
Ghir_A12G008740	0	0.644887	9.88782	1.58855e-06	up	AT3G49810	ARM repeat superfamily protein
Ghir_A12G008950	0.0255445	0	-5.08346	0.0107586	down
Ghir_A12G008990	2.12474	0.725397	-1.35966	0.0453314	down	AT5G65700	Leucine-rich receptor-like protein kinase family protein
Ghir_A12G009990	0.025816	1.82877	6.28478	0.000155754	up	AT4G39690	FUNCTIONS IN: molecular_function unknown; INVOLVED IN: biological_process unknown; LOCATED IN: mitochondrion; EXPRESSED IN: 26 plant structures; EXPRESSED DURING: 14 growth stages; CONTAINS InterPro DOMAIN/s: Mitochondrial inner membrane protein Mitofilin (InterPro:IPR019133); Has 30201 Blast hits to 17322 proteins in 780 species: Archae - 12; Bacteria - 1396; Metazoa - 17338; Fungi - 3422; Plant…
Ghir_A12G010000	0.0200335	0	-5.92178	0.0334191	down	AT2G22125	binding
Ghir_A12G010220	0.15409	0.00284967	-4.92775	0.0131328	down	AT1G12244	Polynucleotidyl transferase, ribonuclease H-like superfamily protein
Ghir_A12G010290	0.867999	0.001425	-8.9066	0.00547477	down	AT1G02080	transcription regulators
Ghir_A12G010590	0.188269	0.470065	1.52109	0.00678993	up	AT5G24910	cytochrome P450, family 714, subfamily A, polypeptide 1
Ghir_A12G010640	0.716001	0.134653	-2.16013	0.00854708	down	AT5G01110	Tetratricopeptide repeat (TPR)-like superfamily protein
Ghir_A12G010750	0.025853	0	-4.04479	0.029747	down	AT5G13800	pheophytinase
Ghir_A12G010780	0.100473	0	-7.16533	0.00906919	down	AT5G13790	AGAMOUS-like 15
Ghir_A12G011120	0.511807	0.0874947	-2.33667	0.0368728	down	AT1G01900	subtilase family protein
Ghir_A12G011530	4.13848	87.9421	4.67263	0.0190268	up	AT3G61550	RING/U-box superfamily protein
Ghir_A12G011610	2.17721	4.10222	1.11908	0.00801392	up	AT4G01370	MAP kinase 4
Ghir_A12G011700	0.0420235	0	-5.7736	0.0237244	down	AT2G46040	ARid/BRIGHT DNA-binding domain;ELM2 domain protein
Ghir_A12G011730	1.22158	0	-24.0614	5.40665e-13	down	AT4G00460	RHO guanyl-nucleotide exchange factor 3
Ghir_A12G011780	1.11309	0	-9.75319	0.000117246	down	AT2G45850	AT hook motif DNA-binding family protein
Ghir_A12G011970	0.416866	0.0484097	-2.81077	0.0284948	down	AT1G01430	TRICHOME BIREFRINGENCE-LIKE 25
Ghir_A12G012020	0.211757	0	-34.7534	1.69051e-06	down	AT3G61690	nucleotidyltransferases
Ghir_A12G012080	0	0.0775433	21.8082	2.87628e-07	up	AT1G01320	Tetratricopeptide repeat (TPR)-like superfamily protein
Ghir_A12G012210	1.23573	0.382384	-1.43812	0.0229438	down	AT3G61850	Dof-type zinc finger DNA-binding family protein
Ghir_A12G012410	4.01649	1.2377	-1.48662	0.0241026	down	AT4G00850	GRF1-interacting factor 3
Ghir_A12G012610	0	0.275071	9.05031	0.00264191	up	AT2G46800	zinc transporter of Arabidopsis thaliana
Ghir_A12G012650	1.56024	0	-10.5992	1.37529e-13	down	AT1G01060	Homeodomain-like superfamily protein
Ghir_A12G012830	0.813956	0.320969	-1.08213	0.0151177	down	AT2G46930	Pectinacetylesterase family protein
Ghir_A12G013060	0.142249	0	-5.73792	0.00197367	down	AT2G43670	Carbohydrate-binding X8 domain superfamily protein
Ghir_A12G013360	0.529733	0.0616597	-2.84015	0.0261986	down	AT1G02560	nuclear encoded CLP protease 5
Ghir_A12G013370	0.0938055	0	-5.92473	0.0189886	down	AT1G29280	WRKY DNA-binding protein 65
Ghir_A12G013640	0.25418	0	-8.84424	0.0399661	down	AT4G02110	transcription coactivators
Ghir_A12G013820	3.05172	0.644452	-2.02683	0.00350448	down	AT1G02730	cellulose synthase-like D5
Ghir_A12G013850	6.31014	2.49138	-1.1487	0.000283638	down	AT2G40940	ethylene response sensor 1
Ghir_A12G014050	0.17777	0.000544667	-7.06823	0.0100379	down	AT4G02400	U3 ribonucleoprotein (Utp) family protein
Ghir_A12G014340	0.717287	3.896	2.57281	0.0328424	up	AT3G19950	RING/U-box superfamily protein
Ghir_A12G014480	1.60159	0	-11.7255	5.85715e-07	down	AT3G13530	mitogen-activated protein kinase kinase kinase 7
Ghir_A12G014560	0.0572015	0	-5.54485	0.0213505	down	AT1G05280	Protein of unknown function (DUF604)
Ghir_A12G014910	0.0351655	0	-4.81671	0.00663147	down	AT4G28140	Integrase-type DNA-binding superfamily protein
Ghir_A12G014970	0.0634355	0	-4.92026	0.0214793	down	AT4G20970	basic helix-loop-helix (bHLH) DNA-binding superfamily protein
Ghir_A12G014980	1.76629	0	-11.355	3.14523e-10	down	AT1G03750	switch 2
Ghir_A12G015060	0	0.000416667	15.8936	0.0106943	up	AT5G44180	Homeodomain-like transcriptional regulator
Ghir_A12G015100	1.3697	269.435	7.80855	1.20008e-10	up	AT1G03870	FASCICLIN-like arabinoogalactan 9
Ghir_A12G015170	0	0.0489663	6.1587	0.00637027	up	AT5G13250	RING finger protein
Ghir_A12G015580	4.01655	0.228077	-3.91336	2.21822e-07	down	AT1G70530	cysteine-rich RLK (RECEPTOR-like protein kinase) 3
Ghir_A12G015800	0.091571	0	-6.5098	0.00285083	down	AT1G24510	TCP-1/cpn60 chaperonin family protein
Ghir_A12G016140	0	0.0849007	21.2986	2.44933e-20	up	AT3G49100	Signal recognition particle, SRP9/SRP14 subunit
Ghir_A12G016720	0.626426	0	-9.37476	0.0219623	down	AT1G05230	homeodomain GLABROUS 2
Ghir_A12G016770	0.999797	0	-23.2634	1.24387e-19	down	AT1G05200	glutamate receptor 3.4
Ghir_A12G016900	0.212171	0	-8.10595	1.30005e-05	down	AT1G68990	male gametophyte defective 3
Ghir_A12G016910	0.0825295	0	-5.44427	0.00614694	down	AT5G03490	UDP-Glycosyltransferase superfamily protein
Ghir_A12G016940	0.235875	0	-7.02467	0.0160872	down	AT1G69010	BES1-interacting Myc-like protein 2
Ghir_A12G017280	0.329711	0	-8.32613	0.00582434	down	AT5G15490	UDP-glucose 6-dehydrogenase family protein
Ghir_A12G017420	0	2.34468	25.5369	0.00125695	up	AT1G14000	VH1-interacting kinase
Ghir_A12G017520	0.36376	0	-7.14099	6.48166e-05	down	AT1G14205	Ribosomal L18p/L5e family protein
Ghir_A12G017530	0.0587755	0	-6.21016	0.0028829	down	AT1G26810	galactosyltransferase1
Ghir_A12G017710	0	0.941991	24.0761	7.12001e-18	up	AT2G02760	ubiquiting-conjugating enzyme 2
Ghir_A12G017980	4.41378	0.883707	-2.11658	0.0237093	down	AT1G25510	Eukaryotic aspartyl protease family protein
Ghir_A12G018130	4.84892	2.02145	-1.0602	0.04829	down	AT1G68810	basic helix-loop-helix (bHLH) DNA-binding superfamily protein
Ghir_A12G018180	0.149152	0	-6.73719	0.00855856	down	AT3G25680	FUNCTIONS IN: molecular_function unknown; INVOLVED IN: biological_process unknown; LOCATED IN: chloroplast; EXPRESSED IN: 21 plant structures; EXPRESSED DURING: 13 growth stages; CONTAINS InterPro DOMAIN/s: S-layer homology domain (InterPro:IPR001119); BEST Arabidopsis thaliana protein match is: unknown protein (TAIR:AT5G23890.1); Has 2454 Blast hits to 2065 proteins in 355 species: Archae - 39; …
Ghir_A12G018360	1.15404	0	-10.1123	0.000437212	down	AT1G26150	proline-rich extensin-like receptor kinase 10
Ghir_A12G018400	2.7935	0	-26.7989	4.79564e-14	down	AT4G16340	guanyl-nucleotide exchange factors;GTPase binding;GTP binding
Ghir_A12G018450	1.65464	0.693948	-1.048	0.00498989	down	AT5G20110	Dynein light chain type 1 family protein
Ghir_A12G018670	0.0999125	0	-6.01056	0.00844969	down	AT2G02870	Galactose oxidase/kelch repeat superfamily protein
Ghir_A12G018790	0.725828	1.26593	1.00568	0.00962537	up	AT1G74580	Pentatricopeptide repeat (PPR) superfamily protein
Ghir_A12G018820	1.98482	4.19712	1.27732	0.0382751	up	AT3G47600	myb domain protein 94
Ghir_A12G018890	0.620062	1.13659	1.0845	0.0430149	up	AT3G47490	HNH endonuclease
Ghir_A12G018990	1.47355	0	-24.5058	1.47299e-31	down	AT5G61360	unknown protein; BEST Arabidopsis thaliana protein match is: unknown protein (TAIR:AT5G07730.1); Has 20 Blast hits to 20 proteins in 7 species: Archae - 0; Bacteria - 0; Metazoa - 0; Fungi - 0; Plants - 16; Viruses - 0; Other Eukaryotes - 4 (source: NCBI BLink).
Ghir_A12G019550	0.0167825	0.69072	5.48713	0.037877	up	AT1G73805	Calmodulin binding protein-like
Ghir_A12G019730	1.78393	0.291092	-2.40906	0.00463458	down	AT3G48280	cytochrome P450, family 71, subfamily A, polypeptide 25
Ghir_A12G019780	0.144953	0	-7.48653	0.0371961	down	AT1G74100	sulfotransferase 16
Ghir_A12G019820	0.544197	0.0421363	-3.44906	0.00109258	down	AT2G31880	Leucine-rich repeat protein kinase family protein
Ghir_A12G020000	0.009529	0.202631	4.68186	0.0405046	up	AT5G14210	Leucine-rich repeat protein kinase family protein
Ghir_A12G020000	0.011093	0.303493	4.9148	0.045759	up	AT5G14210	Leucine-rich repeat protein kinase family protein
Ghir_A12G020010	0.0818235	0	-5.53842	0.00233083	down	AT4G02480	AAA-type ATPase family protein
Ghir_A12G020380	1.61537	0	-11.1271	2.44373e-14	down	AT5G50780	Histidine kinase-, DNA gyrase B-, and HSP90-like ATPase family protein
Ghir_A12G020430	0.159712	0	-6.45637	0.00384634	down	AT5G50800	Nodulin MtN3 family protein
Ghir_A12G020700	4.32298	11.5193	1.63569	0.0149143	up
Ghir_A12G020740	0.0432365	0.135465	1.89345	0.0322279	up	AT5G07380	unknown protein; Has 84 Blast hits to 81 proteins in 31 species: Archae - 0; Bacteria - 0; Metazoa - 42; Fungi - 0; Plants - 41; Viruses - 0; Other Eukaryotes - 1 (source: NCBI BLink).
Ghir_A12G020750	3.94922	1.38387	-1.29971	0.0259514	down	AT5G51060	NADPH/respiratory burst oxidase protein D
Ghir_A12G020760	0.123289	0.0120617	-3.58021	0.00920896	down	AT4G33260	Transducin family protein / WD-40 repeat family protein
Ghir_A12G021010	2.29973	0.493909	-2.03074	0.0356888	down	AT5G61480	Leucine-rich repeat protein kinase family protein
Ghir_A12G021110	0.21581	0.00599533	-4.58156	0.000130475	down	AT3G47420	phosphate starvation-induced gene 3
Ghir_A12G021200	0.25215	0	-7.28741	0.000511239	down	AT1G23280	MAK16 protein-related
Ghir_A12G021230	0.715161	0.209782	-1.55912	0.010029	down	AT1G15530	Concanavalin A-like lectin protein kinase family protein
Ghir_A12G021240	0.687087	0	-9.13902	1.05173e-06	down	AT3G48080	alpha/beta-Hydrolases superfamily protein
Ghir_A12G021500	0.070684	0	-6.13192	0.000372532	down
Ghir_A12G021520	2.53557	0.802934	-1.44843	0.0365918	down	AT5G45400	Replication factor-A protein 1-related
Ghir_A12G021790	0.984453	0.0990897	-3.06828	0.0141853	down	AT1G31930	extra-large GTP-binding protein 3
Ghir_A12G021850	0.776604	0.213202	-1.63541	0.000111032	down	AT1G32190	alpha/beta-Hydrolases superfamily protein
Ghir_A12G021960	0	0.350651	22.1864	3.7507e-14	up	AT5G46850	FUNCTIONS IN: molecular_function unknown; INVOLVED IN: GPI anchor biosynthetic process; LOCATED IN: endomembrane system, endoplasmic reticulum membrane; EXPRESSED IN: 22 plant structures; EXPRESSED DURING: 13 growth stages; CONTAINS InterPro DOMAIN/s: PIG-X/PBN1 (InterPro:IPR013233).
Ghir_A12G022210	0.000751	0.064652	5.57769	0.0235236	up	AT1G32540	lsd one like 1
Ghir_A12G022300	0	0.235349	8.30087	0.00407955	up	AT2G01050	zinc ion binding;nucleic acid binding
Ghir_A12G022660	1.98193	0	-11.6109	1.18882e-12	down	AT2G22740	SU(VAR)3-9 homolog 6
Ghir_A12G022680	0.0914395	0	-6.57024	0.0160478	down	AT4G17570	GATA transcription factor 26
Ghir_A12G022830	0.52716	0	-8.13989	0.00203057	down	AT3G60410	Protein of unknown function (DUF1639)
Ghir_A12G023000	0.709677	0.268273	-1.18553	0.0413164	down	AT3G60580	C2H2-like zinc finger protein
Ghir_A12G023380	0.052997	0	-5.1192	0.00507033	down	AT4G12350	myb domain protein 42
Ghir_A12G023480	0.104317	0.00841167	-3.356	0.0311136	down	AT4G12110	sterol-4alpha-methyl oxidase 1-1
Ghir_A12G023620	0.0486265	0	-5.3841	0.0186142	down	AT1G62960	ACC synthase 10
Ghir_A12G023630	0.15265	0	-7.30092	0.000206297	down	AT4G22860	Cell cycle regulated microtubule associated protein
Ghir_A12G023740	0.095408	0	-5.38742	0.0302083	down	AT1G62990	KNOTTED-like homeobox of Arabidopsis thaliana 7
Ghir_A12G023870	1.08357	0	-25.0407	1.03455e-35	down	AT1G63100	GRAS family transcription factor
Ghir_A12G024140	5.66102	1.39491	-1.8151	0.00196947	down	AT1G63470	AT hook motif DNA-binding family protein
Ghir_A12G024180	0.483548	0.106853	-1.93904	0.00797488	down	AT1G63640	P-loop nucleoside triphosphate hydrolases superfamily protein with CH (Calponin Homology) domain
Ghir_A12G024220	1.09175	8.00989	3.03618	0.0443587	up	ATCG00650	ribosomal protein S18
Ghir_A12G024400	0	0.0837333	6.5987	0.00163575	up	AT3G05170	Phosphoglycerate mutase family protein
Ghir_A12G024430	1.35403	0.184834	-2.64206	0.000406281	down	AT4G23490	Protein of unknown function (DUF604)
Ghir_A12G024510	0.32201	13.7365	5.64811	0.00537927	up	AT4G11280	1-aminocyclopropane-1-carboxylic acid (acc) synthase 6
Ghir_A12G024680	0.316406	0	-22.8086	3.14243e-10	down	AT3G61600	POZ/BTB containin G-protein 1
Ghir_A12G024760	0	0.152206	22.348	7.11314e-17	up	AT4G11110	SPA1-related 2
Ghir_A12G024820	0.106686	0	-6.69506	0.00246998	down	AT4G23810	WRKY family transcription factor
Ghir_A12G024980	0.344562	0.037417	-2.81788	0.00381384	down	AT1G64430	Pentatricopeptide repeat (PPR) superfamily protein
Ghir_A12G024990	1.05309	0.331127	-1.42815	0.00352198	down	AT5G42080	dynamin-like protein
Ghir_A12G025020	0.0963105	0	-22.4195	0.00163575	down	AT2G24200	Cytosol aminopeptidase family protein
Ghir_A12G025040	2.13509	0.559586	-1.71927	0.0128489	down	AT2G46500	phosphoinositide 4-kinase gamma 4
Ghir_A12G025280	0.505702	6.7247	3.96096	0.0291361	up	AT5G41940	Ypt/Rab-GAP domain of gyp1p superfamily protein
Ghir_A12G025540	0.119484	0.01594	-2.83303	0.0190214	down	AT2G46870	AP2/B3-like transcriptional factor family protein
Ghir_A12G025790	6.17565	1.64885	-1.71615	0.00312796	down	AT5G24600	Protein of unknown function, DUF599
Ghir_A12G025920	0.29904	0	-7.5071	6.8613e-06	down	AT5G54160	O-methyltransferase 1
Ghir_A12G025930	1.18206	0	-9.1086	0.000431788	down	AT5G24530	2-oxoglutarate (2OG) and Fe(II)-dependent oxygenase superfamily protein
Ghir_A12G026280	0	0.0417937	27.0123	0.000538465	up	AT4G00990	Transcription factor jumonji (jmjC) domain-containing protein
Ghir_A12G026470	1.65955	0.501837	-1.50524	0.000206297	down	AT5G53220	unknown protein; FUNCTIONS IN: molecular_function unknown; INVOLVED IN: biological_process unknown; LOCATED IN: cellular_component unknown; EXPRESSED IN: 23 plant structures; EXPRESSED DURING: 13 growth stages; Has 30201 Blast hits to 17322 proteins in 780 species: Archae - 12; Bacteria - 1396; Metazoa - 17338; Fungi - 3422; Plants - 5037; Viruses - 0; Other Eukaryotes - 2996 (source: NCBI BLink).
Ghir_A12G026510	9.50392	19.4413	1.22402	0.0265218	up	AT1G64230	ubiquitin-conjugating enzyme 28
Ghir_A12G027590	0.022712	0	-4.77909	0.0229638	down	AT5G51800	Protein kinase superfamily protein
Ghir_A12G027640	6.64345	2.72831	-1.06816	0.00864299	down	AT2G28100	alpha-L-fucosidase 1
Ghir_A12G027860	1.09074	0	-10.1075	4.47833e-13	down	AT3G18490	Eukaryotic aspartyl protease family protein
Ghir_A12G027870	0	9.32076	27.3766	1.06795e-15	up	AT3G25800	protein phosphatase 2A subunit A2
Ghir_A12G028060	0	0.202487	7.86595	0.00221983	up	AT1G18060	unknown protein; INVOLVED IN: biological_process unknown; LOCATED IN: chloroplast; EXPRESSED IN: 22 plant structures; EXPRESSED DURING: 13 growth stages; Has 74 Blast hits to 74 proteins in 29 species: Archae - 0; Bacteria - 19; Metazoa - 0; Fungi - 0; Plants - 49; Viruses - 0; Other Eukaryotes - 6 (source: NCBI BLink).
Ghir_A12G028130	0.312112	0.603169	1.14925	0.0241344	up	AT4G02750	Tetratricopeptide repeat (TPR)-like superfamily protein
Ghir_A12G028540	0.962746	0.0801023	-3.3624	0.0339365	down
Ghir_A12G028630	4.83137	11.0181	1.43018	0.0149143	up	AT3G48000	aldehyde dehydrogenase 2B4
Ghir_A12G028700	0.363099	0	-7.56352	0.0155676	down	AT5G14740	carbonic anhydrase 2
Ghir_A12G028870	0.118029	0	-5.81678	0.00506895	down	AT1G23380	KNOTTED1-like homeobox gene 6
Ghir_A12G029040	0.250182	0.0778107	-1.4021	0.0385517	down	AT3G26540	Tetratricopeptide repeat (TPR)-like superfamily protein
Ghir_A13G000110	0.694396	0.001936	-7.78175	0.000159885	down	AT5G06390	FASCICLIN-like arabinogalactan protein 17 precursor
Ghir_A13G000410	0.053583	0.00398	-2.88273	0.045759	down	AT1G60500	Dynamin related protein 4C
Ghir_A13G000510	0.034057	0	-5.25594	0.00778246	down	AT5G59920	Cysteine/Histidine-rich C1 domain family protein
Ghir_A13G000530	0.058494	0	-4.53537	0.0261397	down
Ghir_A13G000740	2.54582	4.73422	1.10088	6.87651e-06	up	AT5G04830	Nuclear transport factor 2 (NTF2) family protein
Ghir_A13G000830	2.03499	0	-28.7112	0.000155754	down	AT4G02510	translocon at the outer envelope membrane of chloroplasts 159
Ghir_A13G000910	1.06918	0.238828	-1.90758	4.75084e-06	down	AT5G04710	Zn-dependent exopeptidases superfamily protein
Ghir_A13G001380	0.113994	0	-6.61593	0.0116783	down	AT3G55990	Plant protein of unknown function (DUF828)
Ghir_A13G001560	0.155944	0.00926367	-3.24927	0.00672398	down	AT4G00430	plasma membrane intrinsic protein 1;4
Ghir_A13G001590	0	0.127851	6.64979	0.0218043	up	AT2G39960	Microsomal signal peptidase 25 kDa subunit (SPC25)
Ghir_A13G001700	0.0499265	0	-4.86265	0.0142601	down	AT4G33540	metallo-beta-lactamase family protein
Ghir_A13G001710	0.276552	0.014732	-3.68956	0.0111503	down	AT5G49690	UDP-Glycosyltransferase superfamily protein
Ghir_A13G001930	3.19741	0.454171	-2.61694	0.0265162	down	AT3G19500	basic helix-loop-helix (bHLH) DNA-binding superfamily protein
Ghir_A13G002030	0.035595	0	-20.3898	5.23955e-08	down	AT2G39290	phosphatidylglycerolphosphate synthase 1
Ghir_A13G002210	0	0.0645963	6.12466	0.00978804	up	AT3G54890	photosystem I light harvesting complex gene 1
Ghir_A13G002340	0.16828	0	-7.12427	1.96298e-05	down	AT5G03250	Phototropic-responsive NPH3 family protein
Ghir_A13G002430	0.378038	0.0733193	-2.20384	0.0387417	down	AT4G21200	gibberellin 2-oxidase 8
Ghir_A13G002470	2.21224	0.958711	-1.00556	0.0155724	down	AT1G14790	RNA-dependent RNA polymerase 1
Ghir_A13G002540	0.841681	2.50563	1.79807	0.0307712	up	AT2G01818	PLATZ transcription factor family protein
Ghir_A13G002560	0.0545635	0	-5.60021	0.0116643	down	AT5G37490	ARM repeat superfamily protein
Ghir_A13G002650	9.31711	2.84262	-1.50712	0.00526499	down	AT2G01830	CHASE domain containing histidine kinase protein
Ghir_A13G002740	0.243037	0.0335117	-2.51925	0.0148253	down	AT4G39010	glycosyl hydrolase 9B18
Ghir_A13G002820	1.53913	4.5274	1.77124	0.0043257	up	AT1G75540	salt tolerance homolog2
Ghir_A13G003120	0	0.0685413	7.18574	0.0351599	up	AT4G34530	cryptochrome-interacting basic-helix-loop-helix 1
Ghir_A13G003320	0.0418515	0	-5.23523	0.00721963	down	AT1G22030	CONTAINS InterPro DOMAIN/s: Protein BYPASS related (InterPro:IPR008511); BEST Arabidopsis thaliana protein match is: unknown protein (TAIR:AT1G77855.1); Has 99 Blast hits to 99 proteins in 17 species: Archae - 0; Bacteria - 0; Metazoa - 3; Fungi - 0; Plants - 96; Viruses - 0; Other Eukaryotes - 0 (source: NCBI BLink).
Ghir_A13G003430	0.457924	0	-8.1995	0.000614991	down	AT1G09790	COBRA-like protein 6 precursor
Ghir_A13G003680	1.32241	2.68947	1.24768	0.00398041	up	AT2G15730	P-loop containing nucleoside triphosphate hydrolases superfamily protein
Ghir_A13G004080	0.458927	0	-8.74499	0.00226043	down	AT4G34131	UDP-glucosyl transferase 73B3
Ghir_A13G004090	0.154323	0	-6.75621	3.40105e-05	down	AT2G15490	UDP-glycosyltransferase 73B4
Ghir_A13G004170	4.18507	0.725167	-2.31465	0.025467	down	AT4G34220	Leucine-rich repeat protein kinase family protein
Ghir_A13G004220	1.15936	0.047298	-4.35799	0.0011426	down	AT2G15220	Plant basic secretory protein (BSP) family protein
Ghir_A13G004300	1.06241	0.334618	-1.43576	0.0480772	down	AT3G19540	Protein of unknown function (DUF620)
Ghir_A13G004400	1.79175	0.567737	-1.44436	0.0214003	down	AT1G49890	Family of unknown function (DUF566)
Ghir_A13G004490	0.247489	0.04096	-2.46381	0.000135695	down	AT1G27760	interferon-related developmental regulator family protein / IFRD protein family
Ghir_A13G004550	0.338271	0.01207	-4.48412	0.0406091	down	AT4G33800	unknown protein; Has 30201 Blast hits to 17322 proteins in 780 species: Archae - 12; Bacteria - 1396; Metazoa - 17338; Fungi - 3422; Plants - 5037; Viruses - 0; Other Eukaryotes - 2996 (source: NCBI BLink).
Ghir_A13G004650	0.0186315	0	-18.0368	0.0057643	down	AT1G58360	amino acid permease 1
Ghir_A13G004850	0	0.113315	7.77667	0.0136348	up	AT5G10530	Concanavalin A-like lectin protein kinase family protein
Ghir_A13G005070	3.55503	0.869384	-1.81168	0.0284332	down	AT1G26160	Metal-dependent phosphohydrolase
Ghir_A13G005170	0.219874	0.01352	-3.77777	1.1373e-05	down	AT1G68820	Transmembrane Fragile-X-F-associated protein
Ghir_A13G005300	15.3675	0.123593	-6.74057	0.030081	down	AT3G25800	protein phosphatase 2A subunit A2
Ghir_A13G005590	0.102688	0	-5.72068	0.0011869	down	AT1G11120	unknown protein; FUNCTIONS IN: molecular_function unknown; INVOLVED IN: biological_process unknown; LOCATED IN: cellular_component unknown; EXPRESSED IN: 10 plant structures; EXPRESSED DURING: 4 anthesis, F mature embryo stage, petal differentiation and expansion stage, E expanded cotyledon stage, D bilateral stage; BEST Arabidopsis thaliana protein match is: unknown protein (TAIR:AT4G28170.1); H…
Ghir_A13G006370	0.430998	1.82875	2.2751	0.00014561	up	AT4G38160	Mitochondrial transcription termination factor family protein
Ghir_A13G006550	0.793451	4.87199	2.84291	0.0162948	up	AT4G38270	galacturonosyltransferase 3
Ghir_A13G006580	0.051279	0	-4.33211	0.0488148	down	AT1G68200	Zinc finger C-x8-C-x5-C-x3-H type family protein
Ghir_A13G006710	1.17325	0	-9.87835	7.67126e-13	down	AT2G13840	Polymerase/histidinol phosphatase-like
Ghir_A13G006870	8.06341	0.39633	-4.13472	5.87516e-15	down	AT4G33510	3-deoxy-d-arabino-heptulosonate 7-phosphate synthase
Ghir_A13G006940	3.0229	0.697459	-1.91139	0.0198293	down	AT2G36690	2-oxoglutarate (2OG) and Fe(II)-dependent oxygenase superfamily protein
Ghir_A13G007410	0.145438	0.958896	2.90013	0.0340983	up	AT1G69690	TCP family transcription factor
Ghir_A13G007510	0.227232	0.0522567	-1.83187	0.0319699	down	AT1G69600	zinc finger homeodomain 1
Ghir_A13G007740	0.546592	0.0107253	-5.41384	0.00397336	down	AT2G04660	anaphase-promoting complex/cyclosome 2
Ghir_A13G007770	0.42785	0	-7.64926	0.000132414	down	AT5G15310	myb domain protein 16
Ghir_A13G007860	0.450354	3.09298	2.9878	0.00195132	up	AT1G69420	DHHC-type zinc finger family protein
Ghir_A13G008030	0	0.032609	5.94472	0.0235511	up	AT1G13710	cytochrome P450, family 78, subfamily A, polypeptide 5
Ghir_A13G008490	0.986336	0.00275033	-8.33294	5.24623e-05	down	AT1G69370	chorismate mutase 3
Ghir_A13G009500	0.323109	0.0188247	-3.75102	0.0326929	down	AT2G37590	DNA binding with one finger 2.4
Ghir_A13G009690	1.37203	0.00106133	-9.79843	8.76786e-09	down	AT1G68920	basic helix-loop-helix (bHLH) DNA-binding superfamily protein
Ghir_A13G009810	3.17324	0.841378	-1.69691	0.0269907	down	AT2G32400	glutamate receptor 5
Ghir_A13G010110	0.0463635	0.00374033	-3.06989	0.0116808	down	AT1G26230	TCP-1/cpn60 chaperonin family protein
Ghir_A13G010400	0.132996	0	-6.32896	0.0377002	down	AT3G13540	myb domain protein 5
Ghir_A13G010460	0.988923	0.401864	-1.0794	0.0175597	down	AT1G08860	Calcium-dependent phospholipid-binding Copine family protein
Ghir_A13G010630	0	0.279033	8.47288	0.000953721	up	AT1G55530	RING/U-box superfamily protein
Ghir_A13G010640	2.44012	9.11966	2.09949	7.50131e-12	up	AT1G08570	atypical CYS HIS rich thioredoxin 4
Ghir_A13G010700	0.0796385	0.002419	-4.69359	0.00798701	down	AT1G04080	Tetratricopeptide repeat (TPR)-like superfamily protein
Ghir_A13G010740	0.53684	0.0284083	-3.86508	0.0194769	down	AT3G04160	unknown protein; Has 1711 Blast hits to 1353 proteins in 195 species: Archae - 0; Bacteria - 64; Metazoa - 693; Fungi - 201; Plants - 207; Viruses - 0; Other Eukaryotes - 546 (source: NCBI BLink).
Ghir_A13G010810	0.0877575	0	-5.73132	0.0113257	down	AT1G06620	2-oxoglutarate (2OG) and Fe(II)-dependent oxygenase superfamily protein
Ghir_A13G010970	0.147804	0	-7.35759	0.000561832	down	AT3G22780	Tesmin/TSO1-like CXC domain-containing protein
Ghir_A13G011070	0.0169475	0.227792	4.02339	0.0375608	up	AT1G54490	exoribonuclease 4
Ghir_A13G011420	1.65104	0.698758	-1.05122	0.0332976	down	AT3G62770	Transducin/WD40 repeat-like superfamily protein
Ghir_A13G011580	0.0520445	0	-6.00704	0.0048938	down	AT5G27930	Protein phosphatase 2C family protein
Ghir_A13G011800	0.321023	0	-7.94442	0.000310356	down	AT1G56450	20S proteasome beta subunit G1
Ghir_A13G011860	0	1.19419	24.5316	0.0021712	up	AT1G09300	Metallopeptidase M24 family protein
Ghir_A13G012280	0.0367055	0.213998	2.73357	0.0260473	up	AT2G24960	unknown protein; FUNCTIONS IN: molecular_function unknown; INVOLVED IN: biological_process unknown; LOCATED IN: cellular_component unknown; EXPRESSED IN: 21 plant structures; EXPRESSED DURING: 12 growth stages; BEST Arabidopsis thaliana protein match is: unknown protein (TAIR:AT4G02210.2); Has 30201 Blast hits to 17322 proteins in 780 species: Archae - 12; Bacteria - 1396; Metazoa - 17338; Fungi …
Ghir_A13G012380	0.113781	0	-5.77045	0.0472574	down	AT1G71692	AGAMOUS-like 12
Ghir_A13G012470	0.156167	0	-4.68981	0.0472252	down
Ghir_A13G013280	0	0.371292	23.174	0.00166571	up	AT1G54340	isocitrate dehydrogenase
Ghir_A13G013350	2.29333	0	-26.257	6.90269e-50	down	AT5G56240	BEST Arabidopsis thaliana protein match is: hapless 8 (TAIR:AT5G56250.1); Has 35333 Blast hits to 34131 proteins in 2444 species: Archae - 798; Bacteria - 22429; Metazoa - 974; Fungi - 991; Plants - 531; Viruses - 0; Other Eukaryotes - 9610 (source: NCBI BLink).
Ghir_A13G014080	2.69227	0.959731	-1.26942	0.000422956	down	AT4G26640	WRKY family transcription factor family protein
Ghir_A13G014220	0.025563	0.235047	3.24939	0.000918057	up	AT1G04970	lipid-binding serum glycoprotein family protein
Ghir_A13G014260	0.008729	0.390211	5.34554	0.000148412	up	AT4G26790	GDSL-like Lipase/Acylhydrolase superfamily protein
Ghir_A13G014360	0.198303	0.00492133	-4.60661	0.00107913	down	AT4G26930	myb domain protein 97
Ghir_A13G014450	0.729761	0.147191	-2.05361	6.28831e-06	down	AT1G50660	unknown protein; INVOLVED IN: biological_process unknown; LOCATED IN: chloroplast; EXPRESSED IN: 22 plant structures; EXPRESSED DURING: 13 growth stages; BEST Arabidopsis thaliana protein match is: unknown protein (TAIR:AT3G20350.1); Has 21445 Blast hits to 15134 proteins in 1325 species: Archae - 461; Bacteria - 2309; Metazoa - 11052; Fungi - 1737; Plants - 1035; Viruses - 42; Other Eukaryotes -…
Ghir_A13G014460	1.20011	0	-27.9119	4.72015e-16	down	AT5G54930	AT hook motif-containing protein
Ghir_A13G014470	0	0.0199727	18.2269	2.08562e-05	up	AT4G27000	RNA-binding (RRM/RBD/RNP motifs) family protein
Ghir_A13G014490	0.453628	0.0273717	-3.72404	0.0204462	down	AT5G54860	Major facilitator superfamily protein
Ghir_A13G014530	0.0497045	0.406866	3.23399	0.0320773	up	AT5G63960	DNA binding;nucleotide binding;nucleic acid binding;DNA-directed DNA polymerases;DNA-directed DNA polymerases
Ghir_A13G014590	0.386736	0	-8.85776	0.0149742	down	AT4G26340	F-box/RNI-like/FBD-like domains-containing protein
Ghir_A13G014630	0.221739	0	-6.83235	0.000548773	down	AT3G50710	F-box/RNI-like/FBD-like domains-containing protein
Ghir_A13G014890	0.024616	0	-4.62256	0.0165657	down	AT1G50600	scarecrow-like 5
Ghir_A13G014920	0.143329	0.00510633	-4.45028	0.0230856	down	AT3G20660	organic cation/carnitine transporter4
Ghir_A13G015550	0.103863	0.011231	-2.67266	0.0188367	down
Ghir_A13G015590	0	0.138274	22.3039	1.72045e-08	up	AT3G14980	Acyl-CoA N-acyltransferase with RING/FYVE/PHD-type zinc finger protein
Ghir_A13G015610	0.0790195	0	-5.69187	0.00674016	down
Ghir_A13G015620	0	0.251764	22.9463	7.36233e-11	up	AT1G16900	Alg9-like mannosyltransferase family
Ghir_A13G015750	0	3.19179	31.3942	2.96639e-05	up	AT4G24100	Protein kinase superfamily protein
[truncated: 2,298 more rows]

## Sheet: L1 10DPA vs L2 10DPA
Table S4-4. The differentially expressed genes (DEGs) of each pair-wise comparison of L1 10DPA vs L2 10DPA
geneID	L1_10DPA FPKM	L2_10DPA FPKM	log2FC	FDR	up or down_regulated in L2	Arabidopsis ID	ArabDesc
Ghir_A01G001280	0.0854125	0	-18.7437	1.21334e-12	down	AT5G64120	Peroxidase superfamily protein
Ghir_A01G000370	0	0.580622	6.92081	0.0287747	up	AT1G75630	vacuolar H+-pumping ATPase 16 kDa proteolipid subunit 4
Ghir_A01G001380	0.273723	0	-8.21998	0.000259346	down	AT4G38225	unknown protein; FUNCTIONS IN: molecular_function unknown; INVOLVED IN: biological_process unknown; LOCATED IN: chloroplast; EXPRESSED IN: 21 plant structures; EXPRESSED DURING: 13 growth stages; Has 30201 Blast hits to 17322 proteins in 780 species: Archae - 12; Bacteria - 1396; Metazoa - 17338; Fungi - 3422; Plants - 5037; Viruses - 0; Other Eukaryotes - 2996 (source: NCBI BLink).
Ghir_A01G002010	0.423905	0.0416505	-3.30049	0.00263332	down	AT2G20570	GBF's pro-rich region-interacting factor 1
Ghir_A01G002540	0.914126	0.270728	-1.6884	0.00552235	down	AT1G04420	NAD(P)-linked oxidoreductase superfamily protein
Ghir_A01G001200	0.603765	1.86931	1.80098	0.0384722	up	AT4G38270	galacturonosyltransferase 3
Ghir_A01G001210	0.452646	0	-7.66982	0.0178283	down	AT3G43660	Vacuolar iron transporter (VIT) family protein
Ghir_A01G002640	0.210699	0	-21.2596	6.53479e-17	down	AT1G04510	MOS4-associated complex 3A
Ghir_A01G001290	7.43289	17.2766	1.26973	0.0387479	up	AT1G78160	pumilio 7
Ghir_A01G003520	1853.8	736.525	-1.23646	0.00600165	down	AT1G17200	Uncharacterised protein family (UPF0497)
Ghir_A01G003840	0.200955	0	-7.92798	0.00105984	down	AT5G18070	phosphoglucosamine mutase-related
Ghir_A01G006360	0.303152	0	-8.21449	0.000645592	down	AT5G23960	terpene synthase 21
Ghir_A01G002270	0	0.161339	7.92843	0.0252169	up
Ghir_A01G007440	12.8723	1.5024	-3.08074	0.00823037	down	AT3G20310	ethylene response factor 7
Ghir_A01G002600	0	0.042957	6.43985	0.0160846	up	AT3G23510	Cyclopropane-fatty-acyl-phospholipid synthase
Ghir_A01G008370	1.11097	0	-9.6395	0.0035941	down	AT4G26550	Got1/Sft2-like vescicle transport protein family
Ghir_A01G009990	0.784176	0.115907	-2.74838	0.00759065	down	AT1G19835	Plant protein of unknown function (DUF869)
Ghir_A01G010310	0.912092	0	-10.4077	5.41269e-10	down	AT2G16250	Leucine-rich repeat protein kinase family protein
Ghir_A01G010500	2.53704	0.643643	-1.95084	0.00315804	down	AT1G19300	Nucleotide-diphospho-sugar transferases superfamily protein
Ghir_A01G012650	0.172697	0	-6.93594	0.00445766	down	AT4G25310	2-oxoglutarate (2OG) and Fe(II)-dependent oxygenase superfamily protein
Ghir_A01G004020	0.100406	0	-7.46208	0.017009	down	AT3G02660	Tyrosyl-tRNA synthetase, class Ib, bacterial/mitochondrial
Ghir_A01G013860	2.34308	0.692114	-1.6537	2.93814e-09	down	AT3G18010	WUSCHEL related homeobox 1
Ghir_A01G004340	0.060234	0.174949	1.57141	0.0151628	up	AT1G78650	DNA-directed DNA polymerases
Ghir_A01G004480	0.007227	0.261591	4.83128	0.0295618	up	AT1G29800	RING/FYVE/PHD-type zinc finger family protein
Ghir_A01G014070	0.0139985	0	-15.7552	0.000252506	down	AT1G14870	PLANT CADMIUM RESISTANCE 2
Ghir_A01G004850	0	0.107701	6.4387	0.0292602	up	AT1G78870	ubiquitin-conjugating enzyme 35
Ghir_A01G005300	0.0238715	0.37291	3.97538	0.0378762	up	AT3G15290	3-hydroxyacyl-CoA dehydrogenase family protein
Ghir_A01G015310	1.20429	0.428476	-1.43604	9.08732e-05	down	AT1G23390	Kelch repeat-containing F-box family protein
Ghir_A01G015630	13.5026	1.48738	-3.19665	0.00552235	down	AT2G21190	ER lumen protein retaining receptor family protein
Ghir_A01G005670	0.634854	0.152071	-2.05601	0.0175906	down	AT5G53750	CBS domain-containing protein
Ghir_A01G005740	14.7349	57.0406	2.05927	0.0343128	up	AT4G27435	Protein of unknown function (DUF1218)
Ghir_A01G015850	5.41193	0.0165445	-8.11311	0.00926083	down	AT2G21060	glycine-rich protein 2B
Ghir_A01G016750	0.133966	0.003933	-4.99142	0.000112155	down	AT2G45250	Integral membrane protein hemolysin-III homolog
Ghir_A01G016800	0.225762	0	-8.86005	0.00262238	down	AT4G38350	Patched family protein
Ghir_A01G006600	0.375359	17.3797	5.74	0.0245212	up	AT4G05320	polyubiquitin 10
Ghir_A01G016970	0.295463	0.0514885	-2.40923	0.0058507	down	AT3G49430	SER/ARG-rich protein 34A
Ghir_A01G007370	0.983811	2.74999	1.59203	0.0144097	up	AT2G41640	Glycosyltransferase family 61 protein
Ghir_A01G016970	0.163037	0	-7.0748	0.00409914	down	AT3G49430	SER/ARG-rich protein 34A
Ghir_A01G017670	0.0251625	0	-19.0152	9.46041e-08	down	AT1G58025	DNA-binding bromodomain-containing protein
Ghir_A01G007640	0.265819	0.0390975	-2.57984	0.0191107	down	AT1G50590	RmlC-like cupins superfamily protein
Ghir_A01G007840	0	0.0455425	6.01141	0.0140992	up	AT1G55930	CBS domain-containing protein / transporter associated domain-containing protein
Ghir_A01G019070	28.888	4.38062	-2.59222	0.0082054	down	AT2G41740	villin 2
Ghir_A01G008030	0.197807	0	-7.1589	0.0246941	down	AT5G55630	Outward rectifying potassium channel protein
Ghir_A01G020100	0.286716	0.042257	-2.65905	0.000134558	down	AT5G03670	unknown protein; BEST Arabidopsis thaliana protein match is: unknown protein (TAIR:AT2G36420.1); Has 700 Blast hits to 624 proteins in 104 species: Archae - 0; Bacteria - 18; Metazoa - 333; Fungi - 60; Plants - 73; Viruses - 24; Other Eukaryotes - 192 (source: NCBI BLink).
Ghir_A01G020220	1.63201	0.357173	-2.16078	6.39698e-06	down	AT5G03760	Nucleotide-diphospho-sugar transferases superfamily protein
Ghir_A01G021020	0.195354	0.015963	-3.47529	0.00817137	down	AT2G37290	Ypt/Rab-GAP domain of gyp1p superfamily protein
Ghir_A01G008310	0.048658	0	-5.75694	0.0256667	down	AT5G55970	RING/U-box superfamily protein
Ghir_A01G021320	0.409371	0.0534485	-2.80138	0.00712706	down	AT3G53720	cation/H+ exchanger 20
Ghir_A01G008720	0.057822	0	-5.2909	0.0219581	down	AT1G79180	myb domain protein 63
Ghir_A01G021570	0.582762	0	-23.1753	1.51517e-11	down	AT5G02310	proteolysis 6
Ghir_A01G022350	0.988465	0.137807	-2.77701	8.48235e-06	down	AT2G38310	PYR1-like 4
Ghir_A01G022740	0.767657	0	-11.4681	2.55061e-06	down	AT5G42270	FtsH extracellular protease family
Ghir_A01G023100	0.103039	0	-6.56592	0.00788587	down	AT1G30950	F-box family protein
Ghir_A01G010220	0	0.038818	4.85073	0.0414181	up	AT5G66440	unknown protein; BEST Arabidopsis thaliana protein match is: unknown protein (TAIR:AT4G34560.1); Has 1807 Blast hits to 1807 proteins in 277 species: Archae - 0; Bacteria - 0; Metazoa - 736; Fungi - 347; Plants - 385; Viruses - 0; Other Eukaryotes - 339 (source: NCBI BLink).
Ghir_A01G010300	0.0470915	0.408232	3.09099	0.0107636	up	AT1G75240	homeobox protein 33
Ghir_A02G000160	0.240681	0	-27.8441	0.00149417	down	AT2G37230	Tetratricopeptide repeat (TPR)-like superfamily protein
Ghir_A02G002900	2.68206	0.540684	-2.31593	0.00907811	down	AT2G38540	lipid transfer protein 1
Ghir_A02G003070	0.868865	0.0838305	-3.25544	0.00645171	down	AT5G19140	Aluminium induced protein with YGL and LRDR motifs
Ghir_A02G003200	0.086998	0	-6.37319	0.0074617	down	AT1G31710	Copper amine oxidase family protein
Ghir_A02G004080	1.00879	0	-23.9802	7.95552e-11	down	AT4G14350	AGC (cAMP-dependent, cGMP-dependent and protein kinase C) kinase family protein
Ghir_A02G006170	0.052975	0	-19.3171	1.27089e-09	down	AT1G11910	aspartic proteinase A1
Ghir_A01G011540	0.282095	0.982575	1.8645	0.0192215	up	AT1G22310	methyl-CPG-binding domain 8
Ghir_A01G011920	0	0.107571	5.16718	0.0298626	up	AT1G76490	hydroxy methylglutaryl CoA reductase 1
Ghir_A02G007540	0.0983755	0	-8.09019	0.000181613	down	AT1G21650	Preprotein translocase SecA family protein
Ghir_A01G012580	0.1387	0.454914	1.86649	0.0361189	up	AT3G58040	seven in absentia of Arabidopsis 2
Ghir_A01G012620	0	0.0425285	5.15281	0.0405726	up	AT2G41940	zinc finger protein 8
Ghir_A02G008010	0.247974	0	-6.63264	0.00213115	down	AT1G22060	LOCATED IN: vacuole; EXPRESSED IN: 23 plant structures; EXPRESSED DURING: 13 growth stages; BEST Arabidopsis thaliana protein match is: FBD, F-box and Leucine Rich Repeat domains containing protein (TAIR:AT1G22000.1); Has 84739 Blast hits to 38714 proteins in 2257 species: Archae - 1436; Bacteria - 11314; Metazoa - 40747; Fungi - 7706; Plants - 4675; Viruses - 308; Other Eukaryotes - 18553 (sourc…
Ghir_A02G009490	0.263728	0.029561	-2.89056	0.000187891	down	AT3G17611	RHOMBOid-like protein 14
Ghir_A01G013280	0.216079	0	-8.43238	0.0153599	down	AT4G15090	FRS (FAR1 Related Sequences) transcription factor family
Ghir_A02G009660	0.128166	0	-6.84343	0.00954289	down	AT4G25810	xyloglucan endotransglycosylase 6
Ghir_A01G013510	0.301102	0.038357	-2.98641	0.015801	down	AT5G03530	RAB GTPase homolog C2A
Ghir_A01G013620	0.182561	0.410732	1.24979	0.0451291	up	AT1G59960	NAD(P)-linked oxidoreductase superfamily protein
Ghir_A02G010860	18.9492	0	-28.4866	1.55023e-05	down	AT4G23850	AMP-dependent synthetase and ligase family protein
Ghir_A01G013880	0	0.287753	6.73339	0.0100228	up	AT1G23110	unknown protein; FUNCTIONS IN: molecular_function unknown; LOCATED IN: chloroplast; BEST Arabidopsis thaliana protein match is: unknown protein (TAIR:AT1G70900.1).
Ghir_A02G013330	6.70964	1.53634	-2.07098	0.000113566	down	AT3G16240	delta tonoplast integral protein
Ghir_A01G014090	13.3147	4.07681	-1.66493	0.0321352	down
Ghir_A01G014310	0	0.0936965	6.49365	0.0334145	up	AT1G25145	UDP-3-O-acyl N-acetylglycosamine deacetylase family protein
Ghir_A01G014460	187.885	35.2625	-2.41365	0.0214163	down	AT1G70830	MLP-like protein 28
Ghir_A02G018270	0.576537	0	-22.3243	3.68988e-12	down	AT2G21600	endoplasmatic reticulum retrieval protein 1B
Ghir_A01G014790	37.6662	11.3758	-1.63793	0.019194	down	AT1G27970	nuclear transport factor 2B
Ghir_A02G019370	0.786747	0	-23.8308	5.64219e-06	down	AT2G17550	unknown protein; Has 264 Blast hits to 258 proteins in 65 species: Archae - 5; Bacteria - 5; Metazoa - 66; Fungi - 16; Plants - 107; Viruses - 0; Other Eukaryotes - 65 (source: NCBI BLink).
Ghir_A01G014950	0	0.21344	8.7202	0.0309864	up	AT1G27880	DEAD/DEAH box RNA helicase family protein
Ghir_A01G015060	0	0.063871	6.10665	0.0106206	up	AT2G23890	HAD-superfamily hydrolase, subfamily IG, 5'-nucleotidase
Ghir_A01G015070	0.167332	0	-5.94707	0.0362354	down
Ghir_A03G002180	2.01265	0.198548	-3.30063	3.25804e-09	down	AT4G23060	IQ-domain 22
Ghir_A01G015350	20.1949	5.93583	-1.62091	0.0140792	down	AT3G26340	N-terminal nucleophile aminohydrolases (Ntn hydrolases) superfamily protein
Ghir_A03G003040	0.505309	0	-23.0003	4.92485e-15	down	AT2G30470	high-level expression of sugar-inducible gene 2
Ghir_A03G003360	0.309298	0	-22.4413	4.14795e-11	down	AT5G58510	unknown protein; FUNCTIONS IN: molecular_function unknown; INVOLVED IN: biological_process unknown; LOCATED IN: chloroplast; EXPRESSED IN: 23 plant structures; EXPRESSED DURING: 14 growth stages; BEST Arabidopsis thaliana protein match is: unknown protein (TAIR:AT5G55060.2); Has 30201 Blast hits to 17322 proteins in 780 species: Archae - 12; Bacteria - 1396; Metazoa - 17338; Fungi - 3422; Plants …
Ghir_A01G015730	1.00909	0	-9.39057	0.0300585	down	AT2G16630	Pollen Ole e 1 allergen and extensin family protein
Ghir_A01G015810	0	0.133951	6.44596	0.0234185	up	AT4G38700	Disease resistance-responsive (dirigent-like protein) family protein
Ghir_A01G015830	0.595491	0.0854385	-2.6677	0.0302044	down	AT2G21110	Disease resistance-responsive (dirigent-like protein) family protein
Ghir_A03G003490	0.74934	0	-8.74441	0.000901325	down	AT2G30080	ZIP metal ion transporter family
Ghir_A01G015970	0.0201	0.296422	3.76474	0.0417212	up	AT2G16700	actin depolymerizing factor 5
Ghir_A01G016020	0.0227225	0.198522	3.01749	0.0340073	up	AT4G35000	ascorbate peroxidase 3
Ghir_A01G016120	0.0845295	0	-5.11808	0.0352708	down	AT4G35070	SBP (S-ribonuclease binding protein) family protein
Ghir_A01G016150	0.0971585	0.825063	3.20734	0.0101983	up	AT1G68010	hydroxypyruvate reductase
Ghir_A03G004350	0.176869	0	-21.0738	2.00723e-16	down	AT5G60030	unknown protein; BEST Arabidopsis thaliana protein match is: unknown protein (TAIR:AT1G75335.1); Has 1807 Blast hits to 1807 proteins in 277 species: Archae - 0; Bacteria - 0; Metazoa - 736; Fungi - 347; Plants - 385; Viruses - 0; Other Eukaryotes - 339 (source: NCBI BLink).
Ghir_A03G004620	0.707762	0	-8.80846	1.72348e-05	down	AT5G59790	Domain of unknown function (DUF966)
Ghir_A03G005200	0.211302	0	-21.6381	8.19546e-06	down	AT1G07530	SCARECROW-like 14
Ghir_A03G006740	0.117296	0	-20.5996	1.60254e-11	down	AT4G24700	unknown protein; Has 20 Blast hits to 20 proteins in 7 species: Archae - 0; Bacteria - 0; Metazoa - 0; Fungi - 0; Plants - 20; Viruses - 0; Other Eukaryotes - 0 (source: NCBI BLink).
Ghir_A03G007600	0.789861	0.00888	-6.51694	0.00248293	down	AT1G74700	tRNAse Z1
Ghir_A01G017060	0.558071	0.106806	-2.21294	0.0301518	down	AT3G06470	GNS1/SUR4 membrane protein family
Ghir_A03G008620	0.36581	0	-6.95119	0.000303542	down	AT1G74055	unknown protein; FUNCTIONS IN: molecular_function unknown; INVOLVED IN: biological_process unknown; LOCATED IN: chloroplast; EXPRESSED IN: 15 plant structures; EXPRESSED DURING: 6 growth stages; Has 24 Blast hits to 24 proteins in 9 species: Archae - 0; Bacteria - 0; Metazoa - 0; Fungi - 0; Plants - 24; Viruses - 0; Other Eukaryotes - 0 (source: NCBI BLink).
Ghir_A03G010310	0.601151	0.110807	-2.31536	0.00433888	down	AT3G15410	Leucine-rich repeat (LRR) family protein
Ghir_A01G018210	0.37098	0.123825	-1.46769	0.0296728	down	AT1G21830	unknown protein; CONTAINS InterPro DOMAIN/s: Protein of unknown function DUF740 (InterPro:IPR008004); BEST Arabidopsis thaliana protein match is: unknown protein (TAIR:AT1G44608.1); Has 49 Blast hits to 49 proteins in 12 species: Archae - 0; Bacteria - 0; Metazoa - 0; Fungi - 0; Plants - 49; Viruses - 0; Other Eukaryotes - 0 (source: NCBI BLink).
Ghir_A01G018330	0	0.086694	5.64358	0.047171	up	AT1G21550	Calcium-binding EF-hand family protein
Ghir_A03G012080	0.272879	0	-47.6431	8.75176e-16	down	AT1G68920	basic helix-loop-helix (bHLH) DNA-binding superfamily protein
Ghir_A01G018610	2.08896	0.834047	-1.26643	0.0358961	down	AT3G56940	dicarboxylate diiron protein, putative (Crd1)
Ghir_A03G012210	0.200332	0	-5.64883	0.00589059	down	AT5G42905	Polynucleotidyl transferase, ribonuclease H-like superfamily protein
Ghir_A03G013150	0.286596	0	-21.5186	4.99456e-13	down	AT2G02080	indeterminate(id)-domain 4
Ghir_A03G014090	0.790005	0	-9.65784	2.83794e-08	down	AT1G67340	HCP-like superfamily protein with MYND-type zinc finger
Ghir_A01G019810	0.019649	0.14477	2.81756	0.0466592	up	AT3G52600	cell wall invertase 2
Ghir_A03G015140	0.244132	0.019565	-3.4477	0.00286446	down	AT3G26590	MATE efflux family protein
Ghir_A03G015810	0.068705	0	-5.70286	0.00576286	down	AT5G40210	nodulin MtN21 /EamA-like transporter family protein
Ghir_A01G020130	0.501285	0.177027	-1.4461	0.0349824	down	AT5G03680	Duplicated homeodomain-like superfamily protein
Ghir_A03G016400	2.18016	1.01283	-1.052	0.00193613	down	AT3G25920	ribosomal protein L15
Ghir_A03G016550	1.21147	0.172624	-2.7897	0.000603607	down	AT1G68430	unknown protein; FUNCTIONS IN: molecular_function unknown; INVOLVED IN: biological_process unknown; LOCATED IN: chloroplast; EXPRESSED IN: 21 plant structures; EXPRESSED DURING: 13 growth stages; BEST Arabidopsis thaliana protein match is: unknown protein (TAIR:AT1G66890.1); Has 35 Blast hits to 35 proteins in 6 species: Archae - 0; Bacteria - 0; Metazoa - 0; Fungi - 0; Plants - 35; Viruses - 0; …
Ghir_A01G020350	0.0441585	0	-5.45382	0.0382344	down	AT5G03795	Exostosin family protein
Ghir_A01G020420	0	0.870472	8.82829	0.0229416	up	AT3G10060	FKBP-like peptidyl-prolyl cis-trans isomerase family protein
Ghir_A01G020520	0.426963	0.943319	1.22213	0.0211224	up	AT5G03470	Protein phosphatase 2A regulatory B subunit family protein
Ghir_A03G016890	1.77426	0.717934	-1.2387	0.00137142	down	AT1G28110	serine carboxypeptidase-like 45
Ghir_A01G020780	0	0.120661	8.57864	0.0325816	up	AT3G23620	Ribosomal RNA processing Brix domain protein
Ghir_A03G017220	3.78158	0	-11.6006	1.47778e-07	down	AT5G44200	CAP-binding protein 20
Ghir_A03G019390	0.400388	0	-9.04591	0.00164238	down	AT5G64330	Phototropic-responsive NPH3 family protein
Ghir_A01G021090	0.062544	0.276763	2.13039	0.0170504	up	AT2G37360	ABC-2 type transporter family protein
Ghir_A03G020030	2.63784	0	-25.1714	4.08921e-10	down	AT4G33820	Glycosyl hydrolase superfamily protein
Ghir_A03G021030	2.90241	0.996569	-1.51956	0.00152988	down	AT3G18990	AP2/B3-like transcriptional factor family protein
Ghir_A03G021480	0.200616	0.010153	-4.3173	0.00113359	down	AT2G21540	SEC14-like 3
Ghir_A01G021930	0.312752	0.702927	1.21522	0.0397067	up	AT3G09060	Pentatricopeptide repeat (PPR) superfamily protein
Ghir_A03G023390	6.28194	0.117819	-5.51601	9.24246e-06	down	AT1G57680	FUNCTIONS IN: molecular_function unknown; INVOLVED IN: biological_process unknown; LOCATED IN: endomembrane system; EXPRESSED IN: 24 plant structures; EXPRESSED DURING: 15 growth stages; CONTAINS InterPro DOMAIN/s: Uncharacterised conserved protein UCP031277 (InterPro:IPR016971); Has 35333 Blast hits to 34131 proteins in 2444 species: Archae - 798; Bacteria - 22429; Metazoa - 974; Fungi - 991; Pl…
Ghir_A01G022500	0.634954	0	-9.27036	0.0262451	down	AT1G05870	Protein of unknown function (DUF1685)
Ghir_A01G022660	0.636526	1.27479	1.08437	0.0134861	up	AT1G76280	Tetratricopeptide repeat (TPR)-like superfamily protein
Ghir_A04G000110	0.606494	0	-9.10211	0.00534986	down	AT1G64260	MuDR family transposase
Ghir_A04G001700	1.20993	0.0646285	-4.03404	7.61384e-07	down	AT3G20340	Expression of the gene is downregulated in the presence of paraquat, an inducer of photoxidative stress.
Ghir_A04G002280	0.884958	0	-21.7503	9.0882e-14	down
Ghir_A04G002420	0.696102	0.051128	-3.8129	0.000169785	down	AT5G54530	Protein of unknown function, DUF538
Ghir_A04G002810	68.7452	20.5265	-1.69353	3.67825e-11	down	AT3G54470	uridine 5'-monophosphate synthase / UMP synthase (PYRE-F) (UMPS)
Ghir_A04G003270	0.572886	0.122943	-2.15667	0.0015419	down	AT2G44380	Cysteine/Histidine-rich C1 domain family protein
Ghir_A04G005170	0.1678	0	-22.5613	0.000250413	down	AT1G79080	Pentatricopeptide repeat (PPR) superfamily protein
Ghir_A04G005380	0.0081845	0	-16.3894	1.31278e-05	down	AT5G35400	Pseudouridine synthase family protein
Ghir_A02G001670	0.171215	0.339759	1.08763	0.0315602	up	AT1G06710	Tetratricopeptide repeat (TPR)-like superfamily protein
Ghir_A02G002020	21.285	6.31054	-1.71372	0.0372412	down	AT3G23730	xyloglucan endotransglucosylase/hydrolase 16
Ghir_A02G002140	1.46343	0.64685	-1.088	0.0339469	down	AT4G13950	ralf-like 31
Ghir_A04G005400	0.54972	0	-22.6371	2.06537e-11	down	AT2G23950	Leucine-rich repeat protein kinase family protein
Ghir_A02G002680	0	0.0258165	6.00421	0.0175618	up	AT1G04700	PB1 domain-containing protein tyrosine kinase
Ghir_A04G008390	0.671006	0	-21.5625	0.00169156	down	AT5G03110	FUNCTIONS IN: molecular_function unknown; INVOLVED IN: biological_process unknown; LOCATED IN: plasma membrane; BEST Arabidopsis thaliana protein match is: protamine P1 family protein (TAIR:AT2G37100.1); Has 81 Blast hits to 73 proteins in 9 species: Archae - 0; Bacteria - 0; Metazoa - 0; Fungi - 0; Plants - 81; Viruses - 0; Other Eukaryotes - 0 (source: NCBI BLink).
Ghir_A04G008560	0.60789	0.101542	-2.56949	0.00482573	down	AT3G12620	Protein phosphatase 2C family protein
Ghir_A04G009920	0.206567	0	-7.17701	0.00686727	down	AT2G38250	Homeodomain-like superfamily protein
Ghir_A04G011780	0.687824	0	-9.3926	0.000839492	down	AT5G08340	Nucleotidylyl transferase superfamily protein
Ghir_A04G011900	5.2202	0.067099	-6.0176	0.00213143	down	AT5G23395	Cox19-like CHCH family protein
Ghir_A02G003890	3.78583	9.38204	1.37424	0.0274265	up	AT4G14440	3-hydroxyacyl-CoA dehydratase 1
Ghir_A04G013550	61.6085	29.6092	-1.00334	0.000643607	down	AT4G34590	G-box binding factor 6
Ghir_A05G002300	1.95857	0	-24.3381	2.04181e-30	down	AT3G24480	Leucine-rich repeat (LRR) family protein
Ghir_A02G004170	0	0.209078	5.64866	0.0164289	up	AT3G23440	embryo sac development arrest 6
Ghir_A02G004220	0	0.112654	6.14771	0.0288165	up	AT3G23490	cyanase
Ghir_A05G002450	0.190443	0	-7.57385	0.00282821	down	AT3G24560	Adenine nucleotide alpha hydrolases-like superfamily protein
Ghir_A02G004910	0.100941	0.002046	-3.84792	0.0468838	down	AT5G18540	unknown protein; Has 1784 Blast hits to 634 proteins in 116 species: Archae - 0; Bacteria - 0; Metazoa - 1013; Fungi - 200; Plants - 288; Viruses - 0; Other Eukaryotes - 283 (source: NCBI BLink).
Ghir_A02G005130	0.038504	0.379308	3.3182	0.0233917	up	AT3G16730	CONTAINS InterPro DOMAIN/s: Non-SMC condensin II complex, subunit H2-like (InterPro:IPR009378); Has 249 Blast hits to 211 proteins in 82 species: Archae - 0; Bacteria - 0; Metazoa - 145; Fungi - 8; Plants - 30; Viruses - 0; Other Eukaryotes - 66 (source: NCBI BLink).
Ghir_A05G003480	32.6064	5.93073	-2.404	0.000458296	down	AT5G20630	germin 3
Ghir_A02G005630	0.180131	0	-7.88811	0.0232902	down	AT3G06590	basic helix-loop-helix (bHLH) DNA-binding superfamily protein
Ghir_A02G005960	0.124636	0.900566	2.709	0.0137567	up
Ghir_A05G003900	0.06202	0	-19.7778	7.63325e-08	down	AT4G33160	F-box family protein
Ghir_A05G005340	0.832422	0.06758	-3.3528	0.00781246	down	AT2G24280	alpha/beta-Hydrolases superfamily protein
Ghir_A05G005470	0.148525	0	-7.68337	0.00112609	down	AT5G57990	ubiquitin-specific protease 23
Ghir_A05G005960	7.12501	2.60286	-1.366	1.1169e-07	down	AT4G31990	aspartate aminotransferase 5
Ghir_A02G006240	0.37408	0	-7.11815	0.0275517	down	AT4G09580	SNARE associated Golgi protein family
Ghir_A02G006810	0	0.032309	5.75533	0.0272888	up	AT5G42120	Concanavalin A-like lectin protein kinase family protein
Ghir_A02G007090	0.668697	0.000896	-7.64447	0.0157115	down	AT5G25800	Polynucleotidyl transferase, ribonuclease H-like superfamily protein
Ghir_A05G007390	0.0814565	0	-6.64149	0.00065664	down	AT5G12330	Lateral root primordium (LRP) protein-related
Ghir_A02G007930	0	0.127803	7.63135	0.028574	up	AT1G22020	serine hydroxymethyltransferase 6
Ghir_A05G008670	0.467419	0	-7.75885	0.000179798	down	AT2G27770	Plant protein of unknown function (DUF868)
Ghir_A05G008880	2.65918	0	-10.5037	0.000415054	down	AT3G44890	ribosomal protein L9
Ghir_A02G008550	0	0.080208	6.07753	0.0299335	up	AT4G37790	Homeobox-leucine zipper protein family
Ghir_A02G008690	0.067846	0	-6.15178	0.0418845	down	AT1G27460	no pollen germination related 1
Ghir_A05G009730	4.48939	1.05552	-2.06094	0.000119466	down	AT2G39700	expansin A4
Ghir_A05G010120	0.04919	0	-20.0067	9.63301e-13	down	AT5G59980	Polymerase/histidinol phosphatase-like
Ghir_A05G011140	0.231278	0	-23.0136	5.63016e-05	down	AT2G30170	Protein phosphatase 2C family protein
Ghir_A05G011510	5.63563	0.657489	-3.00906	4.07519e-07	down	AT1G07090	Protein of unknown function (DUF640)
Ghir_A05G011960	0.621135	0	-23.5289	4.58726e-10	down	AT3G13000	Protein of unknown function, DUF547
Ghir_A05G012220	0.339199	0.079819	-1.9786	0.0085062	down	AT1G80870	Protein kinase superfamily protein
Ghir_A05G012420	0.324089	0.0262305	-3.6554	0.0063013	down	AT5G25190	Integrase-type DNA-binding superfamily protein
Ghir_A02G010500	1.86621	5.4042	1.69943	0.0287747	up	AT1G64640	early nodulin-like protein 8
Ghir_A02G010850	0.790615	0.0069985	-6.47458	0.0243418	down	AT5G62050	homolog of yeast oxidase assembly 1 (OXA1)
Ghir_A05G012810	0.290522	0	-21.4436	2.18526e-09	down	AT3G25910	Protein of unknown function (DUF1644)
Ghir_A05G013260	2.95103	0.0827745	-5.21411	0.000160453	down	AT1G15260	unknown protein; BEST Arabidopsis thaliana protein match is: unknown protein (TAIR:AT3G16070.1); Has 28 Blast hits to 28 proteins in 7 species: Archae - 0; Bacteria - 0; Metazoa - 0; Fungi - 0; Plants - 28; Viruses - 0; Other Eukaryotes - 0 (source: NCBI BLink).
Ghir_A05G015310	9.47797	1.93074	-2.24698	3.04334e-07	down	AT1G29980	Protein of unknown function, DUF642
Ghir_A02G011380	5.55393	1.875	-1.45402	0.0460186	down	AT5G17440	LUC7 related protein
Ghir_A02G011580	0	0.159312	6.28519	0.0211678	up	AT1G74670	Gibberellin-regulated family protein
Ghir_A02G011920	0.147325	0.0071375	-4.43035	0.0316759	down	AT1G21650	Preprotein translocase SecA family protein
Ghir_A05G016200	0.0827625	0	-6.15072	0.00695128	down
Ghir_A05G017250	1.75162	0	-23.6603	6.04268e-15	down	AT1G11380	PLAC8 family protein
Ghir_A05G018150	1.1186	0.0715675	-4.01065	0.00214799	down	AT1G76630	Tetratricopeptide repeat (TPR)-like superfamily protein
Ghir_A02G012560	0.529852	1.03998	1.05607	0.0204804	up	AT1G71210	Pentatricopeptide repeat (PPR) superfamily protein
Ghir_A05G018520	90.4126	11.6329	-2.93161	0.000779353	down	AT1G20440	cold-regulated 47
Ghir_A02G013020	0.0490755	0	-5.96156	0.0133021	down	AT3G21330	basic helix-loop-helix (bHLH) DNA-binding superfamily protein
Ghir_A05G018860	0.96138	0.12131	-2.98498	0.00416935	down	AT5G42150	Glutathione S-transferase family protein
Ghir_A05G020490	1.59797	0.275286	-2.44581	0.000474948	down	AT5G42680	Protein of unknown function, DUF617
Ghir_A02G013770	1.07277	2.56144	1.32064	0.0219483	up	AT3G15550	unknown protein; Has 25732 Blast hits to 16979 proteins in 961 species: Archae - 144; Bacteria - 1801; Metazoa - 12681; Fungi - 1868; Plants - 912; Viruses - 94; Other Eukaryotes - 8232 (source: NCBI BLink).
Ghir_A02G014080	0.36452	0.047583	-2.5632	0.02117	down	AT3G02910	AIG2-like (avirulence induced gene) family protein
Ghir_A02G014870	0.330698	7.45e-05	-7.68208	0.0150783	down	AT5G64940	ABC2 homolog 13
Ghir_A02G014910	0.0061475	0.144957	4.18642	0.0113334	up	AT4G14540	nuclear factor Y, subunit B3
Ghir_A05G020700	2.14212	0.316513	-2.74844	2.91161e-06	down	AT5G42750	BRI1 kinase inhibitor 1
Ghir_A02G015740	0	0.0781745	6.53227	0.049692	up	AT1G22380	UDP-glucosyl transferase 85A3
Ghir_A05G021520	0.211977	0	-21.3683	1.30364e-11	down	AT1G27460	no pollen germination related 1
Ghir_A05G022470	1.59577	0.624903	-1.24213	0.00783065	down	AT5G49700	Predicted AT-hook DNA-binding family protein
Ghir_A05G024000	4.14254	0.439194	-3.17279	1.766e-05	down	AT1G21830	unknown protein; CONTAINS InterPro DOMAIN/s: Protein of unknown function DUF740 (InterPro:IPR008004); BEST Arabidopsis thaliana protein match is: unknown protein (TAIR:AT1G44608.1); Has 49 Blast hits to 49 proteins in 12 species: Archae - 0; Bacteria - 0; Metazoa - 0; Fungi - 0; Plants - 49; Viruses - 0; Other Eukaryotes - 0 (source: NCBI BLink).
Ghir_A05G028810	2.55364	0	-25.8001	8.20103e-05	down	AT3G27890	NADPH:quinone oxidoreductase
Ghir_A05G028940	0.498192	0.110195	-2.11122	0.00138849	down	AT3G12320	unknown protein; BEST Arabidopsis thaliana protein match is: unknown protein (TAIR:AT5G06980.4); Has 102 Blast hits to 102 proteins in 16 species: Archae - 0; Bacteria - 0; Metazoa - 0; Fungi - 0; Plants - 98; Viruses - 0; Other Eukaryotes - 4 (source: NCBI BLink).
Ghir_A02G016820	2.43638	0.383373	-2.69831	0.0403207	down	AT5G67400	root hair specific 19
Ghir_A02G017050	1.55259	0.561913	-1.44549	0.0103668	down	AT5G67230	Nucleotide-diphospho-sugar transferases superfamily protein
Ghir_A02G017550	0	0.124933	5.82845	0.0157099	up
Ghir_A05G031130	4.30218	0.938547	-2.13301	0.00123564	down	AT3G11340	UDP-Glycosyltransferase superfamily protein
Ghir_A02G017620	0.342274	0.0955475	-1.70739	0.0487363	down	AT2G23470	Protein of unknown function, DUF647
Ghir_A05G032780	1.06381	0.199801	-2.35735	3.29423e-10	down	AT4G13710	Pectin lyase-like superfamily protein
Ghir_A05G034160	1.06083	0.116754	-3.01758	1.31237e-06	down	AT2G40095	Alpha/beta hydrolase related protein
Ghir_A05G034750	1.81559	0.0018125	-9.28893	0.0027755	down	AT5G41110	unknown protein; INVOLVED IN: biological_process unknown; LOCATED IN: chloroplast; BEST Arabidopsis thaliana protein match is: unknown protein (TAIR:AT3G26890.5); Has 1807 Blast hits to 1807 proteins in 277 species: Archae - 0; Bacteria - 0; Metazoa - 736; Fungi - 347; Plants - 385; Viruses - 0; Other Eukaryotes - 339 (source: NCBI BLink).
Ghir_A05G034860	2.03141	0.331039	-2.60475	9.10608e-08	down	AT3G27010	TEOSINTE BRANCHED 1, cycloidea, PCF (TCP)-domain family protein 20
Ghir_A02G018620	0	0.123333	7.09411	0.0125049	up	AT3G50940	P-loop containing nucleoside triphosphate hydrolases superfamily protein
Ghir_A02G019250	0.16523	0.0065015	-4.11725	0.0203338	down	AT2G17650	AMP-dependent synthetase and ligase family protein
Ghir_A05G035210	0.459521	0	-8.93163	0.00570963	down	AT5G14230	CONTAINS InterPro DOMAIN/s: Ankyrin repeat-containing domain (InterPro:IPR020683), Ankyrin repeat (InterPro:IPR002110); BEST Arabidopsis thaliana protein match is: XB3 ortholog 2 in Arabidopsis thaliana (TAIR:AT5G57740.1); Has 66374 Blast hits to 25358 proteins in 1201 species: Archae - 121; Bacteria - 8133; Metazoa - 29530; Fungi - 5885; Plants - 3349; Viruses - 785; Other Eukaryotes - 18571 (so…
Ghir_A05G035720	2.02944	0.150709	-3.79496	0.00323508	down	AT2G34900	Transcription factor GTE6
Ghir_A03G000150	0	0.049543	6.23144	0.0226875	up	AT4G19010	AMP-dependent synthetase and ligase family protein
Ghir_A05G036640	0.831686	0	-27.9424	5.22357e-18	down	AT5G13560	unknown protein; BEST Arabidopsis thaliana protein match is: unknown protein (TAIR:AT2G37370.1); Has 12055 Blast hits to 8846 proteins in 811 species: Archae - 217; Bacteria - 1046; Metazoa - 6104; Fungi - 1115; Plants - 528; Viruses - 14; Other Eukaryotes - 3031 (source: NCBI BLink).
Ghir_A03G000450	2.46823	20.7719	3.06026	0.0452571	up	AT4G25960	P-glycoprotein 2
Ghir_A03G000470	0.150384	0	-5.76054	0.0442006	down	AT4G17790	SNARE associated Golgi protein family
Ghir_A05G037250	13.8863	2.98223	-2.21682	3.02762e-05	down	AT1G23740	Oxidoreductase, zinc-binding dehydrogenase family protein
Ghir_A05G038310	0.719541	0	-10.0568	0.00620925	down	AT1G26580	FUNCTIONS IN: molecular_function unknown; INVOLVED IN: biological_process unknown; LOCATED IN: cellular_component unknown; EXPRESSED IN: 24 plant structures; EXPRESSED DURING: 15 growth stages; BEST Arabidopsis thaliana protein match is: ELM2 domain-containing protein (TAIR:AT2G03470.1); Has 161 Blast hits to 161 proteins in 17 species: Archae - 0; Bacteria - 0; Metazoa - 1; Fungi - 4; Plants - 1…
Ghir_A05G038830	0.148591	0	-6.69917	0.00509134	down	AT2G32580	Protein of unknown function (DUF1068)
Ghir_A05G039970	0.0409325	0	-5.81881	0.00874594	down	AT5G60900	receptor-like protein kinase 1
Ghir_A05G041380	0.154378	0	-6.89071	0.0050468	down	AT2G31945	unknown protein; FUNCTIONS IN: molecular_function unknown; INVOLVED IN: biological_process unknown; LOCATED IN: endomembrane system; EXPRESSED IN: 8 plant structures; EXPRESSED DURING: 4 anthesis, petal differentiation and expansion stage; BEST Arabidopsis thaliana protein match is: unknown protein (TAIR:AT1G05575.1); Has 61 Blast hits to 61 proteins in 10 species: Archae - 0; Bacteria - 0; Metaz…
Ghir_A05G041430	7.14302	2.15162	-1.70553	7.40618e-06	down	AT2G40475	unknown protein; BEST Arabidopsis thaliana protein match is: unknown protein (TAIR:AT3G56260.2); Has 477 Blast hits to 219 proteins in 41 species: Archae - 0; Bacteria - 4; Metazoa - 91; Fungi - 61; Plants - 144; Viruses - 0; Other Eukaryotes - 177 (source: NCBI BLink).
Ghir_A05G041910	0.691509	0.0619125	-3.51635	0.00694189	down	AT1G72830	nuclear factor Y, subunit A3
Ghir_A05G042590	1.5227	0.233938	-2.65106	4.40733e-07	down	AT3G12090	tetraspanin6
Ghir_A03G002410	0	0.0393765	6.4371	0.0226875	up	AT1G63640	P-loop nucleoside triphosphate hydrolases superfamily protein with CH (Calponin Homology) domain
Ghir_A06G000050	17.9182	6.74911	-1.36857	0.00275385	down	AT1G20430	unknown protein; Has 29 Blast hits to 29 proteins in 10 species: Archae - 0; Bacteria - 0; Metazoa - 0; Fungi - 0; Plants - 29; Viruses - 0; Other Eukaryotes - 0 (source: NCBI BLink).
Ghir_A03G002930	0.16014	0	-7.773	0.0133021	down	AT4G26330	Subtilisin-like serine endopeptidase family protein
Ghir_A06G000140	26.3551	1.88697	-3.69218	0.000145771	down	AT1G20225	Thioredoxin superfamily protein
Ghir_A06G000910	2.89681	0	-24.7443	4.95728e-10	down	AT1G75220	Major facilitator superfamily protein
Ghir_A06G002180	8.85071	0.506207	-4.15428	0.000437487	down	AT2G39540	Gibberellin-regulated family protein
Ghir_A06G002210	0.163445	0	-7.49391	0.00533319	down	AT5G43120	ARM-repeat/Tetratricopeptide repeat (TPR)-like protein
Ghir_A06G002590	2.15561	0.337671	-2.66351	0.00384153	down	AT4G07990	Chaperone DnaJ-domain superfamily protein
Ghir_A06G004230	2.95593	1.34679	-1.05873	0.00149577	down	AT1G77810	Galactosyltransferase family protein
Ghir_A06G004890	1.60686	0	-10.5889	1.45638e-10	down	AT1G44110	Cyclin A1;1
Ghir_A03G004640	0.244527	0	-6.67466	0.0133829	down	AT5G59820	C2H2-type zinc finger family protein
Ghir_A06G006300	0.495015	0	-9.06448	7.36989e-07	down	AT5G25510	Protein phosphatase 2A regulatory B subunit family protein
Ghir_A06G007090	0.0879335	0.008822	-3.36398	0.00664674	down
Ghir_A06G008420	0.153989	0	-6.98608	0.000536862	down	AT4G05450	mitochondrial ferredoxin 1
Ghir_A06G008880	0.331797	0	-22.1818	1.71802e-12	down	AT2G26330	Leucine-rich receptor-like protein kinase family protein
Ghir_A03G006120	0	0.137099	8.21612	0.031655	up	AT5G24320	Transducin/WD40 repeat-like superfamily protein
Ghir_A06G009540	1.20254	0	-9.07379	0.000114461	down
Ghir_A06G011660	5.30157	0	-25.1356	3.3515e-18	down	AT2G02470	alfin-like 6
Ghir_A06G012240	0.981733	0	-24.3331	2.89539e-13	down	AT2G40840	disproportionating enzyme 2
Ghir_A06G013870	0.937955	0.021106	-5.27214	1.44657e-05	down	AT1G61050	alpha 1,4-glycosyltransferase family protein
Ghir_A03G006960	3.32421	13.5301	2.0034	0.041233	up	AT5G51400	PLAC8 family protein
Ghir_A06G014860	0.253503	0.0206785	-3.42922	0.00759802	down	AT2G34530	unknown protein; FUNCTIONS IN: molecular_function unknown; INVOLVED IN: biological_process unknown; LOCATED IN: endomembrane system; EXPRESSED IN: flower; EXPRESSED DURING: petal differentiation and expansion stage; BEST Arabidopsis thaliana protein match is: unknown protein (TAIR:AT2G34540.2); Has 35333 Blast hits to 34131 proteins in 2444 species: Archae - 798; Bacteria - 22429; Metazoa - 974; …
Ghir_A03G007930	0	0.026049	6.03051	0.0414262	up	AT1G18670	Protein kinase superfamily protein
Ghir_A03G008110	0.018321	0.163266	3.24763	0.0251022	up	AT5G07810	SNF2 domain-containing protein / helicase domain-containing protein / HNH endonuclease domain-containing protein
Ghir_A03G008260	0.126849	1.73515	3.74387	0.0249967	up	AT5G08020	RPA70-kDa subunit B
Ghir_A06G015580	2.86541	0.342896	-2.98773	0.000445984	down
Ghir_A06G016240	2.42494	0.753931	-1.5732	1.13631e-06	down	AT1G11930	Predicted pyridoxal phosphate-dependent enzyme, YBL036C type
Ghir_A03G010430	0	0.046213	6.02081	0.0356155	up	AT1G48540	Outer arm dynein light chain 1 protein
Ghir_A06G017080	0.197127	0	-8.04073	0.000333128	down	AT3G16030	lectin protein kinase family protein
Ghir_A06G017680	4.36146	0.845719	-2.30995	0.00925157	down	AT2G39970	Mitochondrial substrate carrier family protein
Ghir_A06G019260	0.269414	0	-9.37399	0.000345375	down	AT2G19260	RING/FYVE/PHD zinc finger superfamily protein
Ghir_A06G019320	0.28661	0.013742	-3.97754	1.54608e-05	down	AT5G37930	Protein with RING/U-box and TRAF-like domains
Ghir_A06G019580	0.689224	0	-30.2496	1.61487e-05	down	AT1G30620	NAD(P)-binding Rossmann-fold superfamily protein
Ghir_A06G019900	0.8914	0.114031	-2.895	0.00297375	down	AT4G32250	Protein kinase superfamily protein
Ghir_A03G012240	0.0519625	0	-5.71877	0.0253359	down	AT3G21720	isocitrate lyase
Ghir_A06G019930	13.3305	5.61813	-1.19474	1.79181e-05	down	AT3G15820	phosphatidic acid phosphatase-related / PAP2-related
Ghir_A06G021500	0.769827	0.05794	-3.50736	0.00221767	down	AT4G18480	P-loop containing nucleoside triphosphate hydrolases superfamily protein
Ghir_A06G022930	0.498976	0	-23.5304	1.57618e-05	down	AT1G61140	SNF2 domain-containing protein / helicase domain-containing protein / zinc finger protein-related
Ghir_A07G001340	1.69606	0.154774	-3.27325	0.000233623	down	AT5G11970	Protein of unknown function (DUF3511)
Ghir_A03G013940	0	0.061159	5.73679	0.0131903	up	AT2G01275	RING/FYVE/PHD zinc finger superfamily protein
Ghir_A07G004970	0.853127	0	-23.2723	3.13759e-27	down	AT5G51230	VEFS-Box of polycomb protein
Ghir_A07G005320	2.14635	0.0035335	-8.99039	0.00236602	down	AT5G62000	auxin response factor 2
Ghir_A03G014390	0	0.0850525	7.56253	0.0127892	up	AT3G01750	Ankyrin repeat family protein
Ghir_A03G014430	0.514992	5.89917	3.70412	0.035336	up	AT3G04120	glyceraldehyde-3-phosphate dehydrogenase C subunit 1
Ghir_A03G014460	0.277983	0	-8.19503	0.0125249	down	AT5G08430	SWIB/MDM2 domain;Plus-3;GYF
Ghir_A03G014580	0.196421	0	-6.52535	0.0154781	down	AT5G55850	RPM1-interacting protein 4 (RIN4) family protein
Ghir_A03G014600	0	0.0363085	5.41844	0.0154781	up	AT3G26090	G-protein coupled receptors;GTPase activators
Ghir_A07G005810	0.3742	0.141778	-1.35703	7.85384e-05	down	AT5G14210	Leucine-rich repeat protein kinase family protein
Ghir_A03G015110	0	0.075987	6.63205	0.0351638	up	AT1G70630	Nucleotide-diphospho-sugar transferase family protein
Ghir_A07G006710	0.719047	0	-8.5088	0.000737803	down	AT1G73470	unknown protein; FUNCTIONS IN: molecular_function unknown; INVOLVED IN: biological_process unknown; LOCATED IN: chloroplast; EXPRESSED IN: 22 plant structures; EXPRESSED DURING: 13 growth stages.
Ghir_A03G015560	0	0.072583	5.64442	0.021972	up	AT2G01050	zinc ion binding;nucleic acid binding
Ghir_A03G015610	3.47202	1.05989	-1.69266	0.031715	down
Ghir_A07G007790	0.327035	0	-8.42652	3.81021e-05	down	AT5G16030	unknown protein; BEST Arabidopsis thaliana protein match is: unknown protein (TAIR:AT3G02500.1); Has 30201 Blast hits to 17322 proteins in 780 species: Archae - 12; Bacteria - 1396; Metazoa - 17338; Fungi - 3422; Plants - 5037; Viruses - 0; Other Eukaryotes - 2996 (source: NCBI BLink).
Ghir_A07G008000	0.189135	0	-7.43174	0.00375332	down	AT5G06310	Nucleic acid-binding, OB-fold-like protein
Ghir_A03G015960	0.035956	0.184807	2.35007	0.0191107	up	AT1G59990	DEA(D/H)-box RNA helicase family protein
Ghir_A03G016050	0.346565	0.0151205	-4.33623	0.0271231	down	AT1G59960	NAD(P)-linked oxidoreductase superfamily protein
Ghir_A03G016090	0	0.149646	8.57866	0.0192086	up	AT1G24160	unknown protein; FUNCTIONS IN: molecular_function unknown; INVOLVED IN: biological_process unknown; LOCATED IN: cellular_component unknown; EXPRESSED IN: guard cell; BEST Arabidopsis thaliana protein match is: unknown protein (TAIR:AT1G70100.3).
Ghir_A03G016160	0.0318065	0.187667	2.64494	0.02015	up	AT2G44530	Phosphoribosyltransferase family protein
Ghir_A07G009250	0.324721	0.0252715	-3.21354	0.00775222	down
Ghir_A03G016280	0.0399775	0	-5.57265	0.0373509	down	AT1G27070	5'-AMP-activated protein kinase-related
Ghir_A07G009500	4.2e-05	0	-14.5576	0.00176042	down	AT2G04350	AMP-dependent synthetase and ligase family protein
Ghir_A07G011420	0.258167	0	-8.62407	0.00358409	down	AT3G44820	Phototropic-responsive NPH3 family protein
Ghir_A07G011730	0.105972	0	-6.79873	0.00126213	down	AT1G02205	Fatty acid hydroxylase superfamily
Ghir_A03G016870	0.10977	0	-6.55706	0.0147232	down	AT5G13250	RING finger protein
Ghir_A07G012600	0.424331	0	-8.80523	0.00526499	down	AT2G26980	CBL-interacting protein kinase 3
Ghir_A07G013000	0.1259	0	-8.51503	0.0048192	down	AT5G12400	DNA binding;zinc ion binding;DNA binding
Ghir_A07G013340	0.138487	0	-6.94585	0.00110564	down	AT4G02320	Plant invertase/pectin methylesterase inhibitor superfamily
Ghir_A03G018320	0	0.0830005	6.85235	0.0133422	up	AT3G19970	alpha/beta-Hydrolases superfamily protein
Ghir_A07G014480	0.486286	0.137857	-1.7293	0.00384153	down	AT4G00950	Protein of unknown function (DUF688)
Ghir_A03G018860	0.079199	0	-5.53556	0.0378762	down	AT5G64530	xylem NAC domain 1
Ghir_A07G014550	0.523595	0.0438395	-3.48927	0.000603607	down	AT3G61760	DYNAMIN-like 1B
Ghir_A03G019840	0	0.221926	8.40881	0.0112391	up	AT3G18890	NAD(P)-binding Rossmann-fold superfamily protein
Ghir_A07G014670	0.69078	0.103972	-2.49964	0.00361486	down	AT5G53200	Homeodomain-like superfamily protein
Ghir_A07G014930	0.470331	0.192125	-1.20406	1.42873e-05	down	AT4G01370	MAP kinase 4
Ghir_A03G020610	0.0999065	0.011929	-3.13624	0.0173656	down	AT5G53390	O-acyltransferase (WSD1-like) family protein
Ghir_A03G020660	2.98334	1.21124	-1.28528	0.041823	down	AT1G49780	plant U-box 26
Ghir_A07G015070	0.637319	0	-9.55948	9.00282e-05	down	AT2G45910	U-box domain-containing protein kinase family protein
Ghir_A07G015120	0.104413	0	-8.38069	0.000953794	down	AT1G07910	RNAligase
Ghir_A07G015140	0.198291	0	-34.4278	1.09745e-09	down	AT4G00660	RNAhelicase-like 8
Ghir_A07G016140	0.641467	0	-22.019	0.000788944	down	AT3G04400	Ribosomal protein L14p/L23e family protein
Ghir_A07G018060	0.675473	0.0003285	-8.36472	4.21559e-05	down	AT5G35750	histidine kinase 2
Ghir_A03G021620	0.012832	0.237311	3.91133	0.0144097	up	AT2G16430	purple acid phosphatase 10
Ghir_A03G021720	0.178797	0.923484	2.42705	0.0434948	up	AT2G16460	Protein of unknown function (DUF1640)
Ghir_A03G021840	0.121039	0	-5.52805	0.0486102	down	AT4G34750	SAUR-like auxin-responsive protein family
Ghir_A07G019890	1.04098	0.118559	-3.17116	0.00247038	down
Ghir_A03G022510	0	9.30176	11.9401	0.0114268	up	AT1G29500	SAUR-like auxin-responsive protein family
Ghir_A03G022650	0.057243	0	-5.76202	0.0152778	down	AT4G35250	NAD(P)-binding Rossmann-fold superfamily protein
Ghir_A07G021400	0.192465	0	-21.2198	2.22683e-16	down	AT4G13020	Protein kinase superfamily protein
Ghir_A07G022200	0.561666	0	-7.67113	0.00561821	down	AT3G28917	mini zinc finger 2
Ghir_A03G023030	0.0698555	0.354753	2.35727	0.029078	up	AT4G17000	unknown protein; Has 2862 Blast hits to 2331 proteins in 349 species: Archae - 6; Bacteria - 408; Metazoa - 833; Fungi - 223; Plants - 134; Viruses - 7; Other Eukaryotes - 1251 (source: NCBI BLink).
Ghir_A07G023060	0.223966	0	-7.26759	0.000607432	down	AT2G20430	ROP-interactive CRIB motif-containing protein 6
Ghir_A07G023070	0.256234	0.00945	-4.4472	0.000103339	down	AT4G28590	FUNCTIONS IN: molecular_function unknown; INVOLVED IN: biological_process unknown; LOCATED IN: chloroplast; EXPRESSED IN: 21 plant structures; EXPRESSED DURING: 10 growth stages; BEST Arabidopsis thaliana protein match is: Thioredoxin superfamily protein (TAIR:AT2G31840.1); Has 114 Blast hits to 112 proteins in 39 species: Archae - 2; Bacteria - 0; Metazoa - 17; Fungi - 6; Plants - 67; Viruses - …
Ghir_A03G023640	0.255937	1.34518	2.37865	0.0259606	up	AT5G44635	minichromosome maintenance (MCM2/3/5) family protein
Ghir_A07G023140	2.65883	0.0619265	-5.32842	4.9078e-06	down	AT3G01220	homeobox protein 20
Ghir_A08G000940	0.112323	0	-6.01615	0.00297375	down	AT1G08280	Glycosyltransferase family 29 (sialyltransferase) family protein
Ghir_A04G000060	0	0.112025	5.83488	0.0370103	up
Ghir_A08G001620	0.879298	0.241896	-1.83468	0.00695903	down	AT1G55280	Lipase/lipooxygenase, PLAT/LH2 family protein
Ghir_A04G000320	0.02728	0	-5.41153	0.0426764	down	AT3G14470	NB-ARC domain-containing disease resistance protein
Ghir_A04G000330	3.90872	0.93872	-1.96712	0.0230028	down	AT3G13310	Chaperone DnaJ-domain superfamily protein
Ghir_A08G003220	4.89006	1.03043	-2.15586	7.09156e-10	down	AT2G44290	Bifunctional inhibitor/lipid-transfer protein/seed storage 2S albumin superfamily protein
Ghir_A08G003250	0.0674725	0	-19.4587	2.75286e-08	down	AT2G44420	protein N-terminal asparagine amidohydrolase family protein
Ghir_A08G007260	3.00122	0.586819	-2.26151	1.45602e-05	down	AT3G63140	chloroplast stem-loop binding protein of 41 kDa
Ghir_A08G008080	5.03733	0	-25.8592	1.39227e-18	down	AT2G47710	Adenine nucleotide alpha hydrolases-like superfamily protein
Ghir_A08G008390	0.750394	0.221527	-1.67972	5.96587e-08	down	AT1G51110	Plastid-lipid associated protein PAP / fibrillin family protein
Ghir_A08G008510	1.09189	0	-10.2209	2.58855e-06	down	AT3G13560	O-Glycosyl hydrolases family 17 protein
Ghir_A04G001970	0	0.03001	5.00282	0.0405505	up	AT3G15160	unknown protein; Has 266 Blast hits to 264 proteins in 44 species: Archae - 0; Bacteria - 0; Metazoa - 58; Fungi - 0; Plants - 199; Viruses - 0; Other Eukaryotes - 9 (source: NCBI BLink).
Ghir_A04G002080	0.120135	0	-5.60248	0.0242365	down
Ghir_A08G009060	0.048134	0	-18.7723	4.38985e-09	down	AT2G18850	SET domain-containing protein
Ghir_A08G009860	1.25002	0.0523785	-4.43476	0.000288481	down
Ghir_A04G002590	0	0.197313	8.07179	0.0247463	up	AT4G27350	Protein of unknown function (DUF1223)
Ghir_A08G010250	0.998103	0.0951245	-3.27451	3.87133e-05	down	AT3G18410	Complex I subunit NDUFS6
Ghir_A08G010260	0.0839465	0	-19.8954	4.80342e-08	down	AT1G74680	Exostosin family protein
Ghir_A08G010380	0.388058	0	-8.11652	0.00111368	down	AT1G01540	Protein kinase superfamily protein
Ghir_A08G010420	0.176366	0	-7.08303	0.00389689	down	AT5G52870	unknown protein; BEST Arabidopsis thaliana protein match is: unknown protein (TAIR:AT1G64080.1); Has 1807 Blast hits to 1807 proteins in 277 species: Archae - 0; Bacteria - 0; Metazoa - 736; Fungi - 347; Plants - 385; Viruses - 0; Other Eukaryotes - 339 (source: NCBI BLink).
Ghir_A08G011060	2.86685	0	-23.2345	1.06402e-08	down	AT4G25630	fibrillarin 2
Ghir_A08G011570	0.82876	0	-21.5135	6.8363e-06	down	AT1G32920	unknown protein; FUNCTIONS IN: molecular_function unknown; INVOLVED IN: response to wounding; LOCATED IN: endomembrane system; EXPRESSED IN: 23 plant structures; EXPRESSED DURING: 13 growth stages; BEST Arabidopsis thaliana protein match is: unknown protein (TAIR:AT1G32928.1); Has 42 Blast hits to 42 proteins in 8 species: Archae - 0; Bacteria - 0; Metazoa - 0; Fungi - 0; Plants - 42; Viruses - 0…
Ghir_A04G003800	0	0.018745	5.85978	0.0343062	up	AT4G27190	NB-ARC domain-containing disease resistance protein
Ghir_A04G004000	4.52868	12.8546	1.60592	0.0129407	up	ATCG01280	Chloroplast Ycf2;ATPase, AAA type, core
Ghir_A04G004400	1.30884	0.174982	-2.96881	0.0192777	down
Ghir_A08G011840	0.320883	0	-7.10718	0.000899043	down
Ghir_A08G013440	0.682629	0.0105895	-5.78177	3.10977e-05	down	AT2G46270	G-box binding factor 3
Ghir_A08G014270	0.237203	0	-6.96031	0.000297889	down	AT2G45360	Protein of unknown function (DUF1442)
Ghir_A08G014840	0.526293	0	-26.4017	0.00307666	down	AT1G02145	homolog of asparagine-linked glycosylation 12
Ghir_A08G015130	0.920911	0.322574	-1.46601	0.0031785	down	AT3G52030	F-box family protein with WD40/YVTN repeat doamin
Ghir_A08G016610	0.013007	0	-24.32	0.00817137	down	AT1G32560	Late embryogenesis abundant protein, group 1 protein
Ghir_A04G006160	0.009619	0.0867505	3.32736	0.0143988	up	AT3G12040	DNA-3-methyladenine glycosylase (MAG)
Ghir_A04G006190	0	0.0696255	6.29111	0.0464851	up	AT2G41970	Protein kinase superfamily protein
Ghir_A08G018180	17.7714	7.3162	-1.16292	0.00207546	down	AT1G12330	unknown protein; INVOLVED IN: biological_process unknown; LOCATED IN: chloroplast; EXPRESSED IN: 21 plant structures; EXPRESSED DURING: 12 growth stages; BEST Arabidopsis thaliana protein match is: unknown protein (TAIR:AT5G12900.1); Has 249 Blast hits to 249 proteins in 27 species: Archae - 0; Bacteria - 0; Metazoa - 7; Fungi - 14; Plants - 217; Viruses - 0; Other Eukaryotes - 11 (source: NCBI B…
Ghir_A08G019540	0.52854	0	-8.45258	0.00030707	down	AT5G18400	Cytokine-induced anti-apoptosis inhibitor 1, Fe-S biogenesis
Ghir_A08G019630	0.451728	0.037168	-3.64163	0.000353404	down	AT3G63390	unknown protein; Has 30201 Blast hits to 17322 proteins in 780 species: Archae - 12; Bacteria - 1396; Metazoa - 17338; Fungi - 3422; Plants - 5037; Viruses - 0; Other Eukaryotes - 2996 (source: NCBI BLink).
Ghir_A04G006700	0	0.0261245	4.8402	0.029786	up	AT3G52870	IQ calmodulin-binding motif family protein
Ghir_A04G006780	0.135941	0	-6.09851	0.0197658	down	AT3G52770	protein binding
Ghir_A08G020060	0.058685	0	-20.4963	2.07301e-07	down	AT4G08850	Leucine-rich repeat receptor-like protein kinase family protein
Ghir_A04G007040	0	0.0827185	5.65052	0.0104854	up	AT3G11620	alpha/beta-Hydrolases superfamily protein
Ghir_A04G007250	0	0.104084	6.4099	0.0398654	up	AT2G36430	Plant protein of unknown function (DUF247)
Ghir_A08G021030	0.058811	0	-20.1842	7.12761e-07	down	AT2G30020	Protein phosphatase 2C family protein
Ghir_A04G007560	0.806768	5.63611	2.78523	0.025559	up	AT1G03910	EXPRESSED IN: 25 plant structures; EXPRESSED DURING: 13 growth stages; CONTAINS InterPro DOMAIN/s: Cactin protein, cactus-binding domain, C-terminal (InterPro:IPR019134), Cactin, central region (InterPro:IPR018816); BEST Arabidopsis thaliana protein match is: unknown protein (TAIR:AT2G36815.2); Has 11711 Blast hits to 7382 proteins in 452 species: Archae - 31; Bacteria - 352; Metazoa - 6006; Fung…
Ghir_A08G022040	4.24156	0	-11.7884	0.00057327	down	AT1G03220	Eukaryotic aspartyl protease family protein
Ghir_A04G008240	0	0.077934	4.64678	0.0450576	up	AT5G03230	Protein of unknown function, DUF584
Ghir_A08G023160	0.407973	0	-8.81473	0.00013849	down	AT5G60570	Galactose oxidase/kelch repeat superfamily protein
Ghir_A08G023930	112.823	8.2782	-3.6795	3.3515e-18	down	AT1G65450	HXXXD-type acyl-transferase family protein
Ghir_A08G023940	0.795844	0	-7.66794	0.00413998	down	AT1G65480	PEBP (phosphatidylethanolamine-binding protein) family protein
Ghir_A08G025100	0.521344	0	-8.87458	7.22501e-05	down	AT5G15050	Core-2/I-branching beta-1,6-N-acetylglucosaminyltransferase family protein
Ghir_A04G008860	0	0.01564	5.84323	0.0287747	up	AT3G09470	Major facilitator superfamily protein
Ghir_A04G009250	1.67403	0.651061	-1.24353	0.013102	down	AT3G53850	Uncharacterised protein family (UPF0497)
Ghir_A08G026150	1.84022	0.260761	-2.73661	0.00263332	down	AT2G26040	PYR1-like 2
Ghir_A04G010200	0.419204	0	-8.66762	0.0241996	down	AT2G38290	ammonium transporter 2
Ghir_A04G010570	0.202169	1.45217	2.87379	0.0278103	up	AT3G18290	zinc finger protein-related
Ghir_A08G026170	0.199918	0	-6.20583	0.00172796	down
Ghir_A08G026330	0.0899485	0	-20.1576	2.90031e-11	down	AT4G28880	casein kinase I-like 3
Ghir_A09G001480	0.113865	0	-20.2284	3.87845e-11	down	AT5G39660	cycling DOF factor 2
Ghir_A09G002810	0.170356	0	-7.39784	0.000620442	down	AT1G23740	Oxidoreductase, zinc-binding dehydrogenase family protein
Ghir_A09G003710	0.328931	0.0016425	-7.03205	0.0022934	down	AT5G40770	prohibitin 3
Ghir_A09G006310	0.265315	0	-8.39514	0.00385049	down	AT3G06030	NPK1-related protein kinase 3
Ghir_A04G012160	0.239741	0	-5.82453	0.0296963	down	AT1G21140	Vacuolar iron transporter (VIT) family protein
Ghir_A04G012220	0	0.107569	6.23151	0.0172329	up	AT1G15820	light harvesting complex photosystem II subunit 6
Ghir_A04G012360	22.3056	8.92561	-1.30764	0.02117	down	AT5G64250	Aldolase-type TIM barrel family protein
Ghir_A04G012380	70.917	22.4259	-1.55196	0.0474435	down	AT5G10360	Ribosomal protein S6e
Ghir_A04G013070	1.547	0.700875	-1.07033	0.0493383	down	AT4G34050	S-adenosyl-L-methionine-dependent methyltransferases superfamily protein
Ghir_A04G013160	0.192978	0	-5.72024	0.0298074	down
Ghir_A09G007190	0.042411	0	-18.6367	8.72496e-05	down	AT3G58650	unknown protein; FUNCTIONS IN: molecular_function unknown; INVOLVED IN: biological_process unknown; LOCATED IN: plasma membrane; EXPRESSED IN: 14 plant structures; EXPRESSED DURING: 8 growth stages; BEST Arabidopsis thaliana protein match is: unknown protein (TAIR:AT5G26910.1); Has 2350 Blast hits to 1412 proteins in 248 species: Archae - 0; Bacteria - 487; Metazoa - 577; Fungi - 236; Plants - 18…
Ghir_A09G008080	1.80003	0.0794005	-4.54746	0.000140128	down	AT5G44210	erf domain protein 9
Ghir_A04G013560	0.007044	0.515142	5.888	0.0118835	up	AT2G21540	SEC14-like 3
Ghir_A04G013770	0.027789	0.288852	3.52438	0.0168156	up	AT2G17030	F-box family protein with a domain of unknown function (DUF295)
Ghir_A09G010120	9.97397	4.64642	-1.05245	0.00318591	down	AT2G27830	unknown protein; BEST Arabidopsis thaliana protein match is: unknown protein (TAIR:AT4G22758.1); Has 131 Blast hits to 131 proteins in 17 species: Archae - 0; Bacteria - 0; Metazoa - 0; Fungi - 0; Plants - 131; Viruses - 0; Other Eukaryotes - 0 (source: NCBI BLink).
Ghir_A04G014020	0	0.316916	8.21996	0.021312	up	AT1G10890	unknown protein; FUNCTIONS IN: molecular_function unknown; INVOLVED IN: biological_process unknown; LOCATED IN: chloroplast; EXPRESSED IN: petal, flower, leaf; EXPRESSED DURING: LP.04 four leaves visible, 4 anthesis, petal differentiation and expansion stage; BEST Arabidopsis thaliana protein match is: unknown protein (TAIR:AT5G13340.1); Has 11769 Blast hits to 8435 proteins in 698 species: Archa…
Ghir_A04G014540	0.128624	0.0074355	-3.66977	0.0262766	down	AT1G78560	Sodium Bile acid symporter family
Ghir_A09G011690	0.555047	0.115168	-2.16655	0.00333736	down	AT5G19485	transferases;nucleotidyltransferases
Ghir_A09G012730	7.30647	3.50307	-1.01356	0.00886635	down	AT3G57080	Eukaryotic rpb5 RNA polymerase subunit family protein
Ghir_A04G015650	0.0258035	0.950179	4.9914	0.0314914	up	AT1G60670	Protein of unknown function (DUF3755)
Ghir_A09G015160	0.445815	0	-9.41343	0.000123919	down	AT5G18390	Pentatricopeptide repeat (PPR) superfamily protein
Ghir_A04G016240	1.15112	0.343695	-1.69389	0.0339469	down	AT1G76510	ARid/BRIGHT DNA-binding domain-containing protein
Ghir_A09G017100	0.171	0	-20.5715	3.74452e-14	down	AT5G05830	RING/FYVE/PHD zinc finger superfamily protein
Ghir_A04G016330	0.233633	0.553419	1.27059	0.0468626	up	AT1G42550	plastid movement impaired1
Ghir_A05G000140	0.0167985	0.246595	3.65085	0.0186121	up	AT2G40070	BEST Arabidopsis thaliana protein match is: proline-rich family protein (TAIR:AT3G09000.1); Has 35333 Blast hits to 34131 proteins in 2444 species: Archae - 798; Bacteria - 22429; Metazoa - 974; Fungi - 991; Plants - 531; Viruses - 0; Other Eukaryotes - 9610 (source: NCBI BLink).
Ghir_A05G000400	0.000253	0.336889	6.21103	0.0367324	up	AT4G25910	NFU domain protein 3
Ghir_A09G017800	0.837789	0	-8.9253	4.83929e-06	down	AT2G43940	S-adenosyl-L-methionine-dependent methyltransferases superfamily protein
Ghir_A05G000880	0.666332	0.0782955	-3.13209	0.0245774	down
Ghir_A09G018300	0.339711	0.019878	-3.81176	0.00289961	down	AT3G17980	Calcium-dependent lipid-binding (CaLB domain) family protein
Ghir_A05G001260	0.889837	0.409157	-1.07962	0.0108486	down	AT4G20130	plastid transcriptionally active 14
Ghir_A05G001520	46.6615	11.8045	-1.97579	0.013856	down	AT2G10940	Bifunctional inhibitor/lipid-transfer protein/seed storage 2S albumin superfamily protein
Ghir_A05G001640	0	0.107015	5.73493	0.0228587	up	AT1G80133	unknown protein; LOCATED IN: endomembrane system; Has 154 Blast hits to 154 proteins in 15 species: Archae - 0; Bacteria - 0; Metazoa - 0; Fungi - 0; Plants - 154; Viruses - 0; Other Eukaryotes - 0 (source: NCBI BLink).
Ghir_A05G002290	0.68603	0.008142	-6.29833	0.0110986	down	AT3G24460	Serinc-domain containing serine and sphingolipid biosynthesis protein
Ghir_A09G020410	13.0939	0.466008	-4.71788	8.81101e-07	down	AT1G12240	Glycosyl hydrolases family 32 protein
Ghir_A09G021880	2.0054	0	-23.9485	2.73917e-24	down	AT1G05950	unknown protein; Has 50 Blast hits to 45 proteins in 14 species: Archae - 5; Bacteria - 0; Metazoa - 4; Fungi - 0; Plants - 34; Viruses - 0; Other Eukaryotes - 7 (source: NCBI BLink).
Ghir_A09G023060	1.69231	0	-24.9963	8.6556e-07	down	AT4G14880	O-acetylserine (thiol) lyase (OAS-TL) isoform A1
Ghir_A05G002680	0.12166	0	-7.12302	0.0356155	down	AT2G19880	Nucleotide-diphospho-sugar transferases superfamily protein
Ghir_A09G024220	0.751371	0	-23.0319	5.79739e-12	down	AT2G33360	Protein of unknown function (DUF3527)
Ghir_A05G002840	0.062229	0.23789	1.89355	0.0299103	up	AT4G26270	phosphofructokinase 3
Ghir_A05G003320	0.094827	0	-6.89934	0.019788	down	AT5G57070	hydroxyproline-rich glycoprotein family protein
Ghir_A09G024380	3.07159	0.0067285	-8.49964	0.00937647	down	AT3G23340	casein kinase I-like 10
Ghir_A10G001270	6.17259	1.19507	-2.25641	0.007511	down	AT4G21320	Aldolase-type TIM barrel family protein
Ghir_A10G002260	0.743605	0.083076	-3.11195	0.000968726	down	AT1G53035	unknown protein; FUNCTIONS IN: molecular_function unknown; INVOLVED IN: biological_process unknown; LOCATED IN: endomembrane system; EXPRESSED IN: 23 plant structures; EXPRESSED DURING: 13 growth stages; BEST Arabidopsis thaliana protein match is: unknown protein (TAIR:AT3G15358.1); Has 49 Blast hits to 49 proteins in 9 species: Archae - 0; Bacteria - 0; Metazoa - 0; Fungi - 0; Plants - 49; Virus…
Ghir_A05G004510	0.45093	0.0799165	-2.38623	0.0108639	down	AT5G11790	N-MYC downregulated-like 2
Ghir_A05G004790	2.26183	0.126932	-4.06356	0.0128998	down	AT5G25880	NADP-malic enzyme 3
Ghir_A10G003760	142.645	0	-29.6316	0.000396927	down	AT2G34480	Ribosomal protein L18ae/LX family protein
Ghir_A05G005190	0.163027	0.477805	1.57813	0.0430869	up	AT5G25580	BEST Arabidopsis thaliana protein match is: DDT domain superfamily (TAIR:AT1G18950.1); Has 178 Blast hits to 178 proteins in 75 species: Archae - 0; Bacteria - 4; Metazoa - 51; Fungi - 33; Plants - 60; Viruses - 1; Other Eukaryotes - 29 (source: NCBI BLink).
Ghir_A10G004390	0.104771	0	-20.8281	2.10068e-18	down	AT3G06880	Transducin/WD40 repeat-like superfamily protein
Ghir_A10G004840	0.364204	0	-7.00691	0.00296112	down	AT1G53903	Protein of unknown function (DUF581)
Ghir_A05G005570	0.209577	0	-8.22272	0.0416353	down	AT2G25430	epsin N-terminal homology (ENTH) domain-containing protein / clathrin assembly protein-related
Ghir_A10G005480	0.170744	0	-6.0706	0.00639105	down	AT5G11970	Protein of unknown function (DUF3511)
Ghir_A10G005950	0.955017	0.061148	-3.66251	0.000151678	down	AT1G73040	Mannose-binding lectin superfamily protein
Ghir_A05G005980	0.005932	0.069819	3.47476	0.0292602	up	AT5G25190	Integrase-type DNA-binding superfamily protein
Ghir_A10G006270	0.0762295	0	-20.5205	0.00212418	down	AT4G26080	Protein phosphatase 2C family protein
Ghir_A05G006150	0	0.404947	8.43851	0.0215841	up	AT4G31805	WRKY family transcription factor
Ghir_A10G006380	4.94744	1.14246	-2.1177	0.00207546	down	AT1G52140	unknown protein; BEST Arabidopsis thaliana protein match is: unknown protein (TAIR:AT3G16330.1); Has 114 Blast hits to 114 proteins in 15 species: Archae - 0; Bacteria - 0; Metazoa - 0; Fungi - 0; Plants - 114; Viruses - 0; Other Eukaryotes - 0 (source: NCBI BLink).
Ghir_A05G006330	2.44655	0.0928825	-4.66437	0.0183335	down	AT1G80450	VQ motif-containing protein
Ghir_A05G006650	0	0.211618	8.09067	0.0192613	up	AT5G24870	RING/U-box superfamily protein
Ghir_A05G007070	0.011449	0.108557	3.44835	0.028126	up	AT3G20820	Leucine-rich repeat (LRR) family protein
Ghir_A10G007740	0.301371	0.00638	-5.52521	0.000603599	down	AT1G02410	cytochrome c oxidase assembly protein CtaG / Cox11 family
Ghir_A10G007780	7.46019	0	-28.8589	0.000858495	down	AT3G16050	pyridoxine biosynthesis 1.2
Ghir_A10G007860	0.946722	0.254334	-1.79549	0.000582197	down	AT1G79850	ribosomal protein S17
Ghir_A05G007940	0	0.0231205	6.31682	0.0192777	up	AT2G27170	Structural maintenance of chromosomes (SMC) family protein
Ghir_A05G008110	0.669392	0.0958085	-2.7319	0.01151	down	AT2G27230	transcription factor-related
Ghir_A05G008120	0	0.075737	7.44386	0.012367	up	AT3G44200	NIMA (never in mitosis, gene A)-related 6
Ghir_A10G007890	5.28958	0.501063	-3.33431	6.50794e-09	down	AT1G79830	golgin candidate 5
Ghir_A10G007940	0.319552	0.02443	-3.73444	0.00408831	down	AT3G16175	Thioesterase superfamily protein
Ghir_A10G008990	4.62542	1.2578	-1.85269	0.00980558	down	AT5G67070	ralf-like 34
Ghir_A10G009040	0.0600105	0	-5.81747	0.00500841	down	AT3G50620	P-loop containing nucleoside triphosphate hydrolases superfamily protein
Ghir_A05G008800	14.3317	5.22813	-1.44503	0.0129036	down	AT2G27970	CDK-subunit 2
Ghir_A10G009610	0.679428	0.023483	-4.49834	0.00304714	down	AT2G21320	B-box zinc finger family protein
Ghir_A05G009030	0	0.0984775	7.29758	0.0114689	up	AT5G58700	phosphatidylinositol-speciwc phospholipase C4
Ghir_A10G009750	1.1605	0	-35.2243	1.30588e-18	down	AT5G66030	Golgi-localized GRIP domain-containing protein
Ghir_A05G009290	2.85366	0.038275	-5.92148	0.0482579	down	AT1G07380	Neutral/alkaline non-lysosomal ceramidase
Ghir_A10G010300	0.859249	0.003385	-7.57102	0.00339094	down	AT5G18750	DNAJ heat shock N-terminal domain-containing protein
Ghir_A05G009620	0	0.088806	5.5287	0.0337255	up	AT5G02220	unknown protein; Has 30201 Blast hits to 17322 proteins in 780 species: Archae - 12; Bacteria - 1396; Metazoa - 17338; Fungi - 3422; Plants - 5037; Viruses - 0; Other Eukaryotes - 2996 (source: NCBI BLink).
Ghir_A10G010580	5.87619	1.996	-1.4718	0.00741655	down	AT5G18920	Cox19-like CHCH family protein
Ghir_A10G010640	2.38638	0.407203	-2.52411	0.000189486	down	AT3G23920	beta-amylase 1
Ghir_A05G010080	1.03141	5.0521	2.41195	0.0450576	up	AT3G46220	unknown protein; CONTAINS InterPro DOMAIN/s: Protein of unknown function DUF2042 (InterPro:IPR018611); Has 559 Blast hits to 533 proteins in 154 species: Archae - 3; Bacteria - 32; Metazoa - 305; Fungi - 42; Plants - 50; Viruses - 3; Other Eukaryotes - 124 (source: NCBI BLink).
Ghir_A10G010950	2.14706	0	-23.2853	1.85995e-10	down	AT3G04400	Ribosomal protein L14p/L23e family protein
Ghir_A10G013100	1.05136	0.130758	-2.94552	3.82831e-05	down	AT4G14010	ralf-like 32
Ghir_A05G011080	0	1.06685	10.5684	0.0305361	up	AT1G07090	Protein of unknown function (DUF640)
Ghir_A10G016640	0.462232	0	-8.55482	0.000100254	down	AT5G48970	Mitochondrial substrate carrier family protein
Ghir_A10G017240	2.36264	0	-10.342	1.80803e-07	down	AT1G05385	photosystem II 11 kDa protein-related
Ghir_A05G011600	0.47571	0.108474	-2.00277	0.0225233	down	AT3G54950	patatin-like protein 6
Ghir_A05G011780	0.198714	0	-7.00158	0.0211486	down	AT1G78895	Reticulon family protein
Ghir_A10G017440	5.28464	2.38966	-1.08398	0.00112609	down	AT3G16910	acyl-activating enzyme 7
Ghir_A10G019090	0.094274	0	-5.91113	0.0035131	down	AT1G08315	ARM repeat superfamily protein
Ghir_A10G019450	1.88631	0.0163055	-6.61793	0.00906523	down	AT1G74320	Protein kinase superfamily protein
Ghir_A10G020430	0.743418	0	-23.4721	1.54284e-09	down	AT5G04460	RING/U-box superfamily protein
Ghir_A05G012580	0.087426	0.217059	1.37918	0.0326613	up	AT1G13410	Tetratricopeptide repeat (TPR)-like superfamily protein
Ghir_A05G012760	0	0.036877	5.63993	0.0261032	up	AT3G15605	nucleic acid binding
Ghir_A10G022690	0.441856	0.01191	-4.43398	0.000473014	down	AT5G06070	C2H2 and C2HC zinc fingers superfamily protein
Ghir_A10G023100	0.761477	0.274701	-1.4069	0.0081322	down	AT5G05960	Bifunctional inhibitor/lipid-transfer protein/seed storage 2S albumin superfamily protein
Ghir_A10G024080	0.351365	0	-8.75127	0.00310189	down	AT2G40120	Protein kinase superfamily protein
Ghir_A10G024540	0.271398	0	-7.74582	0.00741655	down	AT2G16530	3-oxo-5-alpha-steroid 4-dehydrogenase family protein
Ghir_A11G000020	0.182975	0.018136	-3.13851	0.00206505	down	AT5G50150	Protein of Unknown Function (DUF239)
Ghir_A11G000600	1.94448	0.779146	-1.24105	0.00339816	down	AT1G18030	Protein phosphatase 2C family protein
Ghir_A11G000750	0.480177	0.090734	-2.40711	0.000103786	down	AT5G51550	EXORDIUM like 3
Ghir_A05G014800	0	0.0407375	5.99772	0.0128354	up	AT2G35640	Homeodomain-like superfamily protein
Ghir_A11G001660	3.65866	0.39334	-3.18105	0.000835029	down	AT5G53730	Late embryogenesis abundant (LEA) hydroxyproline-rich glycoprotein family
Ghir_A11G001840	13.7852	0.0729665	-7.07903	0.000375694	down
Ghir_A11G005300	10.5424	0.370416	-4.77574	9.97587e-13	down	AT5G67210	Protein of unknown function (DUF579)
Ghir_A11G005690	0.573205	0	-7.34549	0.000337783	down	AT4G38090	Ribosomal protein S5 domain 2-like superfamily protein
Ghir_A05G015390	0.0648285	0	-6.40126	0.0272888	down	AT5G46280	Minichromosome maintenance (MCM2/3/5) family protein
Ghir_A05G015860	0.0207555	0.1548	2.83905	0.0152474	up	AT2G42760	unknown protein; CONTAINS InterPro DOMAIN/s: Protein of unknown function DUF1685 (InterPro:IPR012881); Has 170 Blast hits to 164 proteins in 34 species: Archae - 0; Bacteria - 1; Metazoa - 26; Fungi - 10; Plants - 107; Viruses - 0; Other Eukaryotes - 26 (source: NCBI BLink).
Ghir_A11G006160	5.10668	1.81963	-1.43372	0.000862638	down	AT3G51520	diacylglycerol acyltransferase family
Ghir_A05G016180	0.325152	6.80409	4.32535	0.0154781	up	AT2G33990	IQ-domain 9
Ghir_A11G006830	4.49892	0.862813	-2.30028	0.00160406	down
Ghir_A11G007420	0.664121	0.310195	-1.00334	0.00593896	down	AT3G28050	nodulin MtN21 /EamA-like transporter family protein
Ghir_A05G016250	5.9321	2.04621	-1.49063	0.0255683	down	AT5G45960	GDSL-like Lipase/Acylhydrolase superfamily protein
Ghir_A05G016850	0	0.0600455	5.00446	0.0332519	up
Ghir_A05G016920	0	0.0612965	6.25308	0.0284871	up	AT1G61240	Protein of unknown function (DUF707)
Ghir_A05G016960	0	0.0627325	6.40978	0.0481459	up	AT5G18390	Pentatricopeptide repeat (PPR) superfamily protein
Ghir_A05G016960	0	0.062766	6.58048	0.0108189	up	AT5G18390	Pentatricopeptide repeat (PPR) superfamily protein
Ghir_A05G017000	0.229698	0.54567	1.37292	0.0357124	up	AT4G21580	oxidoreductase, zinc-binding dehydrogenase family protein
Ghir_A11G008290	6.57875	0.186989	-4.96458	0.000274073	down	AT3G60390	homeobox-leucine zipper protein 3
Ghir_A11G009680	29.9939	2.86915	-3.20339	0.00494049	down	AT2G45980	unknown protein; FUNCTIONS IN: molecular_function unknown; INVOLVED IN: biological_process unknown; LOCATED IN: cellular_component unknown; EXPRESSED IN: 25 plant structures; EXPRESSED DURING: 15 growth stages; BEST Arabidopsis thaliana protein match is: unknown protein (TAIR:AT4G00355.2); Has 93 Blast hits to 90 proteins in 15 species: Archae - 0; Bacteria - 0; Metazoa - 0; Fungi - 0; Plants - 9…
Ghir_A05G017720	0	0.32672	8.31571	0.0122448	up	AT2G20060	Ribosomal protein L4/L1 family
Ghir_A05G018130	0	0.047907	6.61563	0.0105222	up	AT4G17150	alpha/beta-Hydrolases superfamily protein
Ghir_A11G009900	1.14232	0.38224	-1.55377	0.00588477	down	AT4G01280	Homeodomain-like superfamily protein
Ghir_A05G018220	0.161015	0.004441	-4.41915	0.0281661	down	AT1G42970	glyceraldehyde-3-phosphate dehydrogenase B subunit
Ghir_A05G018400	0.0179565	0.36632	4.24448	0.012488	up	AT5G53770	Nucleotidyltransferase family protein
Ghir_A11G010360	0.110984	0	-6.27289	0.00244458	down	AT1G01360	regulatory component of ABA receptor 1
Ghir_A05G018710	0.081062	0	-5.99591	0.0229165	down	AT1G76040	calcium-dependent protein kinase 29
Ghir_A05G018770	0	0.580794	8.83498	0.0133344	up	AT1G76010	Alba DNA/RNA-binding protein
Ghir_A11G011360	0.071229	0	-6.66033	0.0027816	down	AT3G62060	Pectinacetylesterase family protein
Ghir_A11G011610	1.25422	0.199006	-2.63337	0.00925157	down	AT2G47260	WRKY DNA-binding protein 23
Ghir_A11G011740	3.9297	0.463249	-3.10552	0.000970948	down	AT2G16760	Calcium-dependent phosphotriesterase superfamily protein
Ghir_A11G011800	0.240145	0	-7.21007	0.00788587	down	AT1G02610	RING/FYVE/PHD zinc finger superfamily protein
Ghir_A05G019800	0.0233945	0	-5.09833	0.0435144	down
Ghir_A05G019810	0	0.0682015	6.28442	0.0496389	up	AT3G18030	HAL3-like protein A
Ghir_A11G015440	0.184264	0.0159055	-3.2377	0.000197918	down	AT3G07565	Protein of unknown function (DUF3755)
Ghir_A05G019850	0	0.127279	6.68268	0.0306546	up	AT5G42710	unknown protein; INVOLVED IN: biological_process unknown.
Ghir_A11G015620	15.2842	4.77008	-1.63824	0.00178142	down	AT5G48300	ADP glucose pyrophosphorylase 1
Ghir_A11G016480	4.13933	0.075851	-5.2523	0.00210439	down
Ghir_A05G020600	0	0.070506	5.30158	0.0249967	up
Ghir_A11G017290	47.3322	6.08701	-2.88881	8.04178e-10	down	AT5G16110	unknown protein; FUNCTIONS IN: molecular_function unknown; INVOLVED IN: biological_process unknown; LOCATED IN: chloroplast; EXPRESSED IN: 24 plant structures; EXPRESSED DURING: 15 growth stages; BEST Arabidopsis thaliana protein match is: unknown protein (TAIR:AT3G02555.1); Has 133 Blast hits to 133 proteins in 18 species: Archae - 0; Bacteria - 0; Metazoa - 0; Fungi - 0; Plants - 133; Viruses -…
Ghir_A05G020810	0.384786	0	-9.00086	0.0329537	down	AT5G09890	Protein kinase family protein
Ghir_A05G021000	0.166255	0	-6.78431	0.0108639	down	AT1G46480	WUSCHEL related homeobox 4
Ghir_A11G017530	0.225409	0.0173675	-3.74834	0.00230333	down	AT1G66880	Protein kinase superfamily protein
Ghir_A11G020700	0.883093	0	-24.4426	2.19889e-11	down	AT5G47820	P-loop containing nucleoside triphosphate hydrolases superfamily protein
Ghir_A05G021970	45.9637	317.616	2.84585	0.0370428	up	AT1G50010	tubulin alpha-2 chain
Ghir_A11G021010	0.308327	0	-8.03791	0.00223345	down	AT1G65440	global transcription factor group B1
Ghir_A05G022050	0	0.0138465	5.44298	0.0411822	up	AT3G14470	NB-ARC domain-containing disease resistance protein
Ghir_A05G022090	0.114774	0.391358	1.90356	0.027725	up	AT5G49665	Zinc finger (C3HC4-type RING finger) family protein
Ghir_A11G023020	7.84516	1.3673	-2.49703	0.00238994	down	AT3G49940	LOB domain-containing protein 38
Ghir_A05G022430	0	0.0474795	5.41403	0.0343128	up	AT3G25710	basic helix-loop-helix 32
Ghir_A11G027850	1.35267	0	-27.3186	0.00197507	down	AT1G54610	Protein kinase superfamily protein
Ghir_A05G022790	17.9199	1.17789	-3.90598	0.0351638	down	AT1G72230	Cupredoxin superfamily protein
Ghir_A11G029500	0.402245	0	-6.10996	0.00269734	down	AT3G05725	Protein of unknown function (DUF3511)
Ghir_A05G023090	0	0.060522	7.25047	0.0272888	up	AT4G08920	cryptochrome 1
Ghir_A05G023580	0.0279525	0.16791	2.72136	0.0481061	up	AT1G36380	unknown protein; LOCATED IN: endomembrane system; EXPRESSED IN: 23 plant structures; EXPRESSED DURING: 15 growth stages; Has 14 Blast hits to 14 proteins in 6 species: Archae - 0; Bacteria - 0; Metazoa - 0; Fungi - 0; Plants - 14; Viruses - 0; Other Eukaryotes - 0 (source: NCBI BLink).
Ghir_A11G029680	0.124047	0	-7.08108	0.00247038	down	AT1G74150	Galactose oxidase/kelch repeat superfamily protein
Ghir_A11G033480	4.69612	2.03057	-1.13032	0.00589434	down	AT2G41130	basic helix-loop-helix (bHLH) DNA-binding superfamily protein
Ghir_A05G024030	0.138286	0.383999	1.59699	0.0175618	up	AT1G44446	Pheophorbide a oxygenase family protein with Rieske [2Fe-2S] domain
Ghir_A05G024290	0.031827	0.119595	1.99173	0.0291541	up	AT1G21640	NAD kinase 2
Ghir_A05G024320	0.05043	0.159997	1.69504	0.0346109	up	AT1G21580	Zinc finger C-x8-C-x5-C-x3-H type family protein
Ghir_A11G033560	1.28111	0.331581	-1.9738	0.0066706	down	AT2G41250	Haloacid dehalogenase-like hydrolase (HAD) superfamily protein
Ghir_A11G033580	1.86465	0	-11.0585	2.06761e-06	down	AT3G10250	Plant protein 1589 of unknown function
Ghir_A11G034380	3.35152	0.462193	-2.79815	0.00206623	down	AT3G14470	NB-ARC domain-containing disease resistance protein
Ghir_A05G025830	0	0.096587	6.46887	0.0303929	up	AT1G76310	CYCLIN B2;4
Ghir_A11G034930	102.03	4.25662	-4.59709	0.000160978	down	AT2G36830	gamma tonoplast intrinsic protein
Ghir_A05G026480	0.166181	0	-6.75874	0.0219537	down	AT2G26490	Transducin/WD40 repeat-like superfamily protein
Ghir_A11G034940	3.56801	1.30607	-1.42005	0.00334228	down	AT2G36835	unknown protein; FUNCTIONS IN: molecular_function unknown; INVOLVED IN: biological_process unknown; LOCATED IN: chloroplast envelope; EXPRESSED IN: 22 plant structures; EXPRESSED DURING: 13 growth stages; Has 26 Blast hits to 26 proteins in 11 species: Archae - 0; Bacteria - 0; Metazoa - 0; Fungi - 0; Plants - 26; Viruses - 0; Other Eukaryotes - 0 (source: NCBI BLink).
Ghir_A11G035400	0.256734	0	-6.86703	0.000473014	down	AT5G05960	Bifunctional inhibitor/lipid-transfer protein/seed storage 2S albumin superfamily protein
Ghir_A05G027120	0.274565	0.774895	1.49292	0.0279312	up	AT1G78300	general regulatory factor 2
Ghir_A05G027540	4.19053	5.4e-05	-10.3545	0.0173494	down	AT1G76920	F-box family protein
Ghir_A12G000310	2.54365	0.012476	-7.62196	0.00197729	down	AT3G63280	NIMA-related kinase 4
Ghir_A05G028800	0.005308	0.035611	2.88466	0.0418196	up	AT3G07960	Phosphatidylinositol-4-phosphate 5-kinase family protein
Ghir_A12G001770	4.70527	0	-25.2955	2.13367e-12	down	AT5G09590	mitochondrial HSO70 2
Ghir_A12G001900	0.738856	0	-8.81618	0.00126372	down	AT1G49975	INVOLVED IN: photosynthesis; LOCATED IN: photosystem I, chloroplast, thylakoid membrane; EXPRESSED IN: 20 plant structures; EXPRESSED DURING: 13 growth stages; CONTAINS InterPro DOMAIN/s: Photosystem I reaction centre subunit N (InterPro:IPR008796); Has 34 Blast hits to 34 proteins in 14 species: Archae - 0; Bacteria - 0; Metazoa - 0; Fungi - 0; Plants - 34; Viruses - 0; Other Eukaryotes - 0 (sou…
Ghir_A05G029230	0	0.0362065	5.02432	0.0449116	up	AT5G48670	AGAMOUS-like 80
Ghir_A12G002050	1.80207	0.485449	-1.80804	6.37261e-05	down	AT3G19540	Protein of unknown function (DUF620)
Ghir_A12G003750	0.399981	0	-8.69674	0.00382941	down	AT4G35030	Protein kinase superfamily protein
Ghir_A12G003910	0.148556	0.0193635	-2.7451	0.000425937	down	AT4G34940	armadillo repeat only 1
Ghir_A12G005070	6.13332	0	-44.9635	2.52188e-46	down
Ghir_A12G005340	0.721653	0	-23.9039	6.81238e-17	down	AT3G54230	suppressor of abi3-5
[truncated: 2,987 more rows]
