# Supplementary material for: Co-expression network and comparative transcriptome analysis for fiber initiation and elongation reveal genetic differences in two lines from upland cotton CCRI70 RIL population
Source: PeerJ. 2021 Jul 21;9:e11812. doi: 10.7717/peerj.11812 (PMC8308610; doi:10.7717/peerj.11812)
Supplement: Supplemental Information 5 [file peerj-09-11812-s005.xlsx]

## Sheet: L1 -3DPA vs L1 0DPA
Table S5-1. The differentially expressed genes (DEGs) of each pair-wise comparison of L1 -3DPA vs L1 0DPA
geneID	L1_-3DPA FPKM	L1_0DPA FPKM	log2FC	FDR	up or down_regulated in L2	Arabidopsis ID	ArabDesc
Ghir_A01G000370	0.0100757	0.592832	5.09723	0.0272039	up	AT1G75630	vacuolar H+-pumping ATPase 16 kDa proteolipid subunit 4
Ghir_A01G000510	0.04263	3.01803	6.13853	1.34933e-22	up	AT2G16280	3-ketoacyl-CoA synthase 9
Ghir_A01G000620	0.904851	0.0689233	-3.59972	2.16607e-06	down	AT3G18990	AP2/B3-like transcriptional factor family protein
Ghir_A01G000820	7.73536	17.7144	1.27017	0.0130798	up	AT2G09990	Ribosomal protein S5 domain 2-like superfamily protein
Ghir_A01G001410	24.4508	7.99598	-1.53096	0.00153883	down	AT4G38130	histone deacetylase 1
Ghir_A01G001700	2.29748	5.84562	1.42678	0.0173296	up	AT3G15534	unknown protein; FUNCTIONS IN: molecular_function unknown; INVOLVED IN: biological_process unknown; LOCATED IN: cellular_component unknown; BEST Arabidopsis thaliana protein match is: unknown protein (TAIR:AT1G52855.1); Has 30201 Blast hits to 17322 proteins in 780 species: Archae - 12; Bacteria - 1396; Metazoa - 17338; Fungi - 3422; Plants - 5037; Viruses - 0; Other Eukaryotes - 2996 (source: NC…
Ghir_A01G002020	1.35061	5.21516	2.06036	0.0203045	up	AT2G20562	unknown protein; LOCATED IN: endomembrane system; BEST Arabidopsis thaliana protein match is: unknown protein (TAIR:AT2G31090.1); Has 70 Blast hits to 70 proteins in 13 species: Archae - 0; Bacteria - 0; Metazoa - 0; Fungi - 0; Plants - 70; Viruses - 0; Other Eukaryotes - 0 (source: NCBI BLink).
Ghir_A01G003580	0.061733	1.06528	4.2227	0.00410977	up	AT3G14440	nine-cis-epoxycarotenoid dioxygenase 3
Ghir_A01G003670	0	4.23649	52.1968	2.46e-164	up
Ghir_A01G003680	7.366	0.0809523	-6.42554	3.30532e-05	down	AT1G17110	ubiquitin-specific protease 15
Ghir_A01G003720	0.0450793	3.3494	6.20325	5.06702e-19	up
Ghir_A01G003770	0	0.0391877	4.96746	0.00800128	up
Ghir_A01G003800	0.0153273	0.293063	4.47635	0.00238245	up
Ghir_A01G003890	0.309691	0.124423	-1.24246	0.0454708	down	AT3G14690	cytochrome P450, family 72, subfamily A, polypeptide 15
Ghir_A01G003990	0	0.564597	26.7662	7.75867e-05	up	AT4G27190	NB-ARC domain-containing disease resistance protein
Ghir_A01G004190	0	0.0739903	6.66625	0.0313342	up	AT1G78710	TRICHOME BIREFRINGENCE-LIKE 42
Ghir_A01G005710	3.18723	0.090328	-5.01036	0.000687978	down	AT1G52920	G protein coupled receptor
Ghir_A01G005770	0.119983	0.455401	2.04243	0.0425878	up	AT4G27420	ABC-2 type transporter family protein
Ghir_A01G005780	0.105256	0.870041	3.1097	0.00714825	up	AT4G27410	NAC (No Apical Meristem) domain transcriptional regulator superfamily protein
Ghir_A01G005840	2.68516	7.87215	1.64333	3.67179e-08	up	AT5G54400	S-adenosyl-L-methionine-dependent methyltransferases superfamily protein
Ghir_A01G005860	0	0.208932	6.67697	1.10433e-05	up	AT1G52855	unknown protein; BEST Arabidopsis thaliana protein match is: unknown protein (TAIR:AT3G15534.1); Has 35333 Blast hits to 34131 proteins in 2444 species: Archae - 798; Bacteria - 22429; Metazoa - 974; Fungi - 991; Plants - 531; Viruses - 0; Other Eukaryotes - 9610 (source: NCBI BLink).
Ghir_A01G006070	1.69907	24.6073	3.95601	1.14507e-07	up	AT4G10270	Wound-responsive family protein
Ghir_A01G006200	3.36316	81.3673	4.69622	7.96379e-10	up	AT4G27280	Calcium-binding EF-hand family protein
Ghir_A01G006390	2.35568	7.26124	1.7385	0.0148244	up	AT5G48150	GRAS family transcription factor
Ghir_A01G006490	31.9221	14.4112	-1.06588	2.50222e-09	down	AT5G54680	basic helix-loop-helix (bHLH) DNA-binding superfamily protein
Ghir_A01G006590	7.16617	20.0015	1.55865	0.013184	up	AT4G05050	ubiquitin 11
Ghir_A01G006790	0.769731	0	-24.8337	6.05513e-15	down	AT4G23160	cysteine-rich RLK (RECEPTOR-like protein kinase) 8
Ghir_A01G006820	1.30264	9.38038	2.92538	0.00653939	up	AT5G54840	Ras-related small GTP-binding family protein
Ghir_A01G007160	0.756677	2.32763	1.69005	2.05508e-05	up	AT4G04630	Protein of unknown function, DUF584
Ghir_A01G007420	0	0.291475	7.71287	0.000191974	up	AT5G55180	O-Glycosyl hydrolases family 17 protein
Ghir_A01G007430	0.133446	0.751566	2.53551	0.0154174	up	AT2G05790	O-Glycosyl hydrolases family 17 protein
Ghir_A01G007450	0.73393	3.81493	2.44212	9.50966e-07	up	AT3G20300	Protein of unknown function (DUF3537)
Ghir_A01G008620	0.0454077	0	-6.4957	0.00752493	down	AT2G30070	potassium transporter 1
Ghir_A01G008720	1.18545	5.92769	2.39558	0.00117514	up	AT1G79180	myb domain protein 63
Ghir_A01G009270	0.439669	5.00854	3.59462	3.14484e-13	up	AT1G21010	unknown protein; FUNCTIONS IN: molecular_function unknown; INVOLVED IN: N-terminal protein myristoylation; LOCATED IN: cellular_component unknown; EXPRESSED IN: 24 plant structures; EXPRESSED DURING: 14 growth stages; BEST Arabidopsis thaliana protein match is: unknown protein (TAIR:AT1G76600.1); Has 206 Blast hits to 206 proteins in 13 species: Archae - 0; Bacteria - 0; Metazoa - 0; Fungi - 0; P…
Ghir_A01G009500	3.61918	0.155794	-4.44207	0.0031631	down	AT1G20760	Calcium-binding EF hand family protein
Ghir_A01G009680	2.6495	5.66299	1.18156	0.0050217	up	AT4G35750	SEC14 cytosolic factor family protein / phosphoglyceride transfer family protein
Ghir_A01G009910	17.1791	78.7813	2.28036	0.000795638	up	AT2G17880	Chaperone DnaJ-domain superfamily protein
Ghir_A01G010060	0.948471	0.00224467	-7.52072	0.00962357	down	AT1G30845	unknown protein; Has 120 Blast hits to 120 proteins in 67 species: Archae - 0; Bacteria - 0; Metazoa - 35; Fungi - 37; Plants - 23; Viruses - 0; Other Eukaryotes - 25 (source: NCBI BLink).
Ghir_A01G010500	1.64911	0.637272	-1.29326	0.026251	down	AT1G19300	Nucleotide-diphospho-sugar transferases superfamily protein
Ghir_A01G010510	0	0.327222	9.64817	0.0149714	up	AT1G19270	DA1
Ghir_A01G010770	0.036732	0.170074	2.18373	0.0452405	up	AT5G42890	sterol carrier protein 2
Ghir_A01G011040	0.0998877	129.565	10.396	1.96207e-06	up
Ghir_A01G011630	0.202164	0.643365	1.7632	0.00104224	up	AT5G13150	exocyst subunit exo70 family protein C1
Ghir_A01G012460	0.014645	0.292454	4.3793	0.00404761	up	AT3G11690	unknown protein; FUNCTIONS IN: molecular_function unknown; INVOLVED IN: biological_process unknown; LOCATED IN: chloroplast; EXPRESSED IN: 24 plant structures; EXPRESSED DURING: 15 growth stages; BEST Arabidopsis thaliana protein match is: unknown protein (TAIR:AT5G06380.1); Has 84 Blast hits to 84 proteins in 12 species: Archae - 0; Bacteria - 0; Metazoa - 0; Fungi - 0; Plants - 84; Viruses - 0;…
Ghir_A01G012920	4.35881	0.571815	-2.8487	0.0320422	down	AT3G52870	IQ calmodulin-binding motif family protein
Ghir_A01G013130	0	0.209621	6.20618	0.00112232	up
Ghir_A01G013600	0.729079	0.164624	-2.06662	0.00302754	down	AT2G01950	BRI1-like 2
Ghir_A01G013750	1.63471	0.334565	-2.20434	0.00151607	down	AT1G75010	GTP binding
Ghir_A01G013790	0.31289	1.21399	2.0138	0.00831106	up	ATCG01050	NADH-Ubiquinone/plastoquinone (complex I) protein
Ghir_A01G013860	0.920643	1.80937	1.05004	5.2601e-06	up	AT3G18010	WUSCHEL related homeobox 1
Ghir_A01G014410	0.401244	1.98357	2.38325	5.36874e-21	up	AT3G19850	Phototropic-responsive NPH3 family protein
Ghir_A01G014460	0.701248	8.11636	3.59447	5.00709e-07	up	AT1G70830	MLP-like protein 28
Ghir_A01G014680	5.77128	1.81646	-1.60109	0.00244107	down	AT4G38620	myb domain protein 4
Ghir_A01G014720	0	0.412928	8.38419	0.04061	up	AT2G01300	unknown protein; BEST Arabidopsis thaliana protein match is: unknown protein (TAIR:AT1G15010.1); Has 73 Blast hits to 73 proteins in 12 species: Archae - 0; Bacteria - 0; Metazoa - 0; Fungi - 0; Plants - 73; Viruses - 0; Other Eukaryotes - 0 (source: NCBI BLink).
Ghir_A01G015380	0.306902	0.0788327	-1.85677	0.00401871	down	AT1G67420	Zn-dependent exopeptidases superfamily protein
Ghir_A01G015550	53.4078	4.53211	-3.48443	0.00840375	down	AT1G23420	Plant-specific transcription factor YABBY family protein
Ghir_A01G015710	1.95411	21.5051	3.53439	4.43744e-20	up	AT2G21140	proline-rich protein 2
Ghir_A01G015870	4.16122	1.49951	-1.38888	0.01592	down	AT2G21050	like AUXIN RESISTANT 2
Ghir_A01G016320	5.20375	1.00738	-2.28967	0.000466378	down	AT2G16950	transportin 1
Ghir_A01G016520	2.17436	27.277	3.76508	0.000191974	up	AT3G45970	expansin-like A1
Ghir_A01G017120	1.0177	0.289565	-1.73095	0.0177091	down	AT5G47160	YDG/SRA domain-containing protein
Ghir_A01G018210	4.54427	1.5975	-1.42587	0.000186282	down	AT1G21830	unknown protein; CONTAINS InterPro DOMAIN/s: Protein of unknown function DUF740 (InterPro:IPR008004); BEST Arabidopsis thaliana protein match is: unknown protein (TAIR:AT1G44608.1); Has 49 Blast hits to 49 proteins in 12 species: Archae - 0; Bacteria - 0; Metazoa - 0; Fungi - 0; Plants - 49; Viruses - 0; Other Eukaryotes - 0 (source: NCBI BLink).
Ghir_A01G018280	0.646557	4.36591	2.81936	2.749e-07	up	AT1G21750	PDI-like 1-1
Ghir_A01G018680	38.0818	98.0194	1.44769	9.94343e-06	up	AT2G41010	calmodulin (CAM)-binding protein of 25 kDa
Ghir_A01G018750	1.46684	5.45467	1.97879	1.33011e-08	up	AT2G41410	Calcium-binding EF-hand family protein
Ghir_A01G019130	6.12894	13.6915	1.23519	0.00359491	up	AT1G43710	Pyridoxal phosphate (PLP)-dependent transferases superfamily protein
Ghir_A01G019460	0.0137427	3.17888	7.83099	3.82619e-15	up	AT2G35930	plant U-box 23
Ghir_A01G019560	0.78159	2.91121	1.97534	7.63218e-05	up	AT3G11660	NDR1/HIN1-like 1
Ghir_A01G019570	0.36445	6.79356	4.30883	0.00673933	up	AT2G35980	Late embryogenesis abundant (LEA) hydroxyproline-rich glycoprotein family
Ghir_A01G019650	0.50375	4.59881	3.25808	4.25566e-11	up	AT3G11600	unknown protein; FUNCTIONS IN: molecular_function unknown; INVOLVED IN: response to karrikin; EXPRESSED IN: 21 plant structures; EXPRESSED DURING: 12 growth stages; BEST Arabidopsis thaliana protein match is: unknown protein (TAIR:AT5G06270.1); Has 171 Blast hits to 171 proteins in 15 species: Archae - 0; Bacteria - 0; Metazoa - 0; Fungi - 0; Plants - 171; Viruses - 0; Other Eukaryotes - 0 (sourc…
Ghir_A01G020020	11.4573	89.17	3.05114	8.63586e-08	up	AT2G36320	A20/AN1-like zinc finger family protein
Ghir_A01G020060	23.2994	55.1317	1.31528	0.00434724	up	AT3G44590	60S acidic ribosomal protein family
Ghir_A01G020150	0.650372	22.0456	5.15525	5.41689e-09	up	AT2G27770	Plant protein of unknown function (DUF868)
Ghir_A01G020160	0.919177	3.66892	2.06882	0.0145528	up	AT3G44735	PHYTOSULFOKINE 3 PRECURSOR
Ghir_A01G020530	1.05936	0.241627	-2.01525	0.0426443	down	AT2G36840	ACT-like superfamily protein
Ghir_A01G020800	0.517111	3.47381	2.83557	0.0355202	up	AT3G53380	Concanavalin A-like lectin protein kinase family protein
Ghir_A01G020830	0	0.0712113	5.65215	0.000319779	up	AT5G03120	unknown protein; FUNCTIONS IN: molecular_function unknown; INVOLVED IN: biological_process unknown; LOCATED IN: endomembrane system; EXPRESSED IN: 21 plant structures; EXPRESSED DURING: 13 growth stages; Has 14 Blast hits to 14 proteins in 4 species: Archae - 0; Bacteria - 0; Metazoa - 0; Fungi - 0; Plants - 14; Viruses - 0; Other Eukaryotes - 0 (source: NCBI BLink).
Ghir_A01G021090	0.396893	0.997221	1.40264	0.0476898	up	AT2G37360	ABC-2 type transporter family protein
Ghir_A01G021620	0.005614	5.27959	9.45277	3.45266e-15	up	AT5G02420	unknown protein; Has 90 Blast hits to 90 proteins in 10 species: Archae - 0; Bacteria - 0; Metazoa - 0; Fungi - 0; Plants - 90; Viruses - 0; Other Eukaryotes - 0 (source: NCBI BLink).
Ghir_A01G021750	0.350516	9.22271	4.83767	0.000151245	up	AT3G54040	PAR1 protein
Ghir_A01G021960	49.5786	22.8536	-1.0518	1.02724e-05	down	AT2G38090	Duplicated homeodomain-like superfamily protein
Ghir_A01G022190	3.80174	0.375826	-3.27061	0.00182368	down	AT3G08940	light harvesting complex photosystem II
Ghir_A01G022720	0	0.031012	5.48521	0.0226051	up	AT1G76240	Arabidopsis protein of unknown function (DUF241)
Ghir_A02G000560	22.8808	61.3623	1.49992	0.0152464	up	AT5G03850	Nucleic acid-binding, OB-fold-like protein
Ghir_A02G001110	0.0758877	0.240015	1.70209	0.00339042	up	AT3G59690	IQ-domain 13
Ghir_A02G001450	0.115411	0	-31.6207	2.98453e-13	down	AT3G59470	Far-red impaired responsive (FAR1) family protein
Ghir_A02G001880	0.302814	0.952303	1.71922	6.899e-05	up	AT3G07340	basic helix-loop-helix (bHLH) DNA-binding superfamily protein
Ghir_A02G002020	4.02589	13.9797	1.89512	0.00164837	up	AT3G23730	xyloglucan endotransglucosylase/hydrolase 16
Ghir_A02G002030	0.01781	0.231369	3.74403	0.0136071	up	AT3G23740	unknown protein; FUNCTIONS IN: molecular_function unknown; INVOLVED IN: biological_process unknown; LOCATED IN: chloroplast; EXPRESSED IN: 9 plant structures; EXPRESSED DURING: C globular stage, F mature embryo stage, petal differentiation and expansion stage, E expanded cotyledon stage, D bilateral stage; BEST Arabidopsis thaliana protein match is: unknown protein (TAIR:AT4G14120.1); Has 155 Bla…
Ghir_A02G002210	0.161161	4.14812	4.79003	0.00760228	up	AT5G43490	unknown protein; Has 1807 Blast hits to 1807 proteins in 277 species: Archae - 0; Bacteria - 0; Metazoa - 736; Fungi - 347; Plants - 385; Viruses - 0; Other Eukaryotes - 339 (source: NCBI BLink).
Ghir_A02G002880	0.0112823	0.146129	3.64168	0.0206768	up	AT2G29420	glutathione S-transferase tau 7
Ghir_A02G003420	0	0.0668213	6.02903	0.0356078	up	AT3G22620	Bifunctional inhibitor/lipid-transfer protein/seed storage 2S albumin superfamily protein
Ghir_A02G003460	0.123417	4.81248	5.40633	4.89905e-06	up	AT2G32030	Acyl-CoA N-acyltransferases (NAT) superfamily protein
Ghir_A02G003860	0.652546	4.43645	2.8532	0.00782965	up	AT4G14450	unknown protein; LOCATED IN: chloroplast; BEST Arabidopsis thaliana protein match is: unknown protein (TAIR:AT3G23170.1); Has 74 Blast hits to 74 proteins in 6 species: Archae - 0; Bacteria - 0; Metazoa - 0; Fungi - 0; Plants - 74; Viruses - 0; Other Eukaryotes - 0 (source: NCBI BLink).
Ghir_A02G003890	0.285384	0.985034	1.83475	0.000120929	up	AT4G14440	3-hydroxyacyl-CoA dehydratase 1
Ghir_A02G004270	0.575498	0.127147	-2.09261	0.00141019	down	AT3G23510	Cyclopropane-fatty-acyl-phospholipid synthase
Ghir_A02G004550	11.0777	34.6015	1.71927	0.0221035	up	AT4G13520	small acidic protein 1
Ghir_A02G004890	1.64874	0	-24.3224	1.10433e-05	down	AT5G07900	Mitochondrial transcription termination factor family protein
Ghir_A02G004900	2.53081	0.00290733	-8.73985	1.98337e-05	down	AT5G07900	Mitochondrial transcription termination factor family protein
Ghir_A02G004990	1.01181	3.53924	1.88589	5.74873e-07	up	AT4G15800	ralf-like 33
Ghir_A02G005030	204.076	426.938	1.14155	0.00182368	up	AT3G16640	translationally controlled tumor protein
Ghir_A02G005340	4.94365	12.335	1.41902	0.0172955	up	AT4G16120	COBRA-like protein-7 precursor
Ghir_A02G005450	0.74112	0.0128277	-5.75618	1.19282e-08	down	AT3G03450	RGA-like 2
Ghir_A02G005500	0	0.282896	8.19608	0.000832025	up	AT3G66654	Cyclophilin-like peptidyl-prolyl cis-trans isomerase family protein
Ghir_A02G005550	0.149206	2.20748	3.95908	2.21168e-06	up	AT3G15740	RING/U-box superfamily protein
Ghir_A02G005690	7.14656	3.29856	-1.03686	0.00180453	down	AT5G65960	GTP binding
Ghir_A02G005970	22.2934	76.4302	1.86714	0.000252414	up	AT3G17390	S-adenosylmethionine synthetase family protein
Ghir_A02G006150	0	0.955305	28.9888	1.25439e-05	up	AT3G21760	UDP-Glycosyltransferase superfamily protein
Ghir_A02G006250	5.07443	34.285	2.85602	0.0065761	up	AT1G75750	GAST1 protein homolog 1
Ghir_A02G006610	0.209763	1.41345	2.81419	6.62602e-07	up	AT5G61890	Integrase-type DNA-binding superfamily protein
Ghir_A02G006800	1.46073	14.172	3.3812	4.22543e-11	up	AT3G18710	plant U-box 29
Ghir_A02G007940	0.152485	1.56242	3.42867	0.00400211	up	AT1G22030	CONTAINS InterPro DOMAIN/s: Protein BYPASS related (InterPro:IPR008511); BEST Arabidopsis thaliana protein match is: unknown protein (TAIR:AT1G77855.1); Has 99 Blast hits to 99 proteins in 17 species: Archae - 0; Bacteria - 0; Metazoa - 3; Fungi - 0; Plants - 96; Viruses - 0; Other Eukaryotes - 0 (source: NCBI BLink).
Ghir_A02G008070	0.768767	3.44395	2.25024	3.9381e-05	up	AT1G78080	related to AP2 4
Ghir_A02G008130	13.2315	74.0093	2.57976	4.04572e-05	up	AT4G08950	Phosphate-responsive 1 family protein
Ghir_A02G008260	0.076762	0.788034	3.4337	5.71686e-07	up	ATCG01280	Chloroplast Ycf2;ATPase, AAA type, core
Ghir_A02G008500	55.6641	26.2627	-1.00548	0.00281945	down	AT1G50010	tubulin alpha-2 chain
Ghir_A02G008630	0.47958	2.12344	2.21733	0.000130447	up	AT4G10810	unknown protein; FUNCTIONS IN: molecular_function unknown; INVOLVED IN: biological_process unknown; LOCATED IN: chloroplast; EXPRESSED IN: 23 plant structures; EXPRESSED DURING: 15 growth stages; BEST Arabidopsis thaliana protein match is: unknown protein (TAIR:AT4G24026.1); Has 1807 Blast hits to 1807 proteins in 277 species: Archae - 0; Bacteria - 0; Metazoa - 736; Fungi - 347; Plants - 385; Vi…
Ghir_A02G008720	5.26161	89.5147	4.17687	8.32981e-06	up	AT1G27730	salt tolerance zinc finger
Ghir_A02G009260	0.214928	1.10993	2.43799	0.00124143	up	AT4G20780	calmodulin like 42
Ghir_A02G009540	4.09191	0.29178	-3.70176	0.0102226	down	AT1G20080	Calcium-dependent lipid-binding (CaLB domain) family protein
Ghir_A02G009660	0.474589	5.99262	3.75405	0.00832576	up	AT4G25810	xyloglucan endotransglycosylase 6
Ghir_A02G010250	0.023406	2.45589	6.79863	1.88641e-05	up	AT3G49290	ABL interactor-like protein 2
Ghir_A02G010300	23.7474	62.2088	1.47946	2.71862e-07	up	AT5G42020	Heat shock protein 70 (Hsp 70) family protein
Ghir_A02G010700	0	0.0585443	7.00268	0.0150326	up	AT4G23950	Galactose-binding protein
Ghir_A02G011250	0.0247567	0.480455	4.2725	0.00836299	up	AT1G64065	Late embryogenesis abundant (LEA) hydroxyproline-rich glycoprotein family
Ghir_A02G011570	0.834901	7.93566	3.31805	1.76009e-07	up	AT3G57670	C2H2-type zinc finger family protein
Ghir_A02G011620	2.70095	0	-27.3261	1.13133e-07	down	AT3G10250	Plant protein 1589 of unknown function
Ghir_A02G011660	0.432026	1.39797	1.77249	0.0133924	up	AT1G15760	Sterile alpha motif (SAM) domain-containing protein
Ghir_A02G012190	0.052644	1.55875	4.96714	0.00236389	up	AT1G31130	unknown protein; FUNCTIONS IN: molecular_function unknown; INVOLVED IN: biological_process unknown; LOCATED IN: cellular_component unknown; EXPRESSED IN: 23 plant structures; EXPRESSED DURING: 13 growth stages; BEST Arabidopsis thaliana protein match is: unknown protein (TAIR:AT4G19950.1); Has 246 Blast hits to 244 proteins in 29 species: Archae - 2; Bacteria - 16; Metazoa - 0; Fungi - 0; Plants …
Ghir_A02G012500	2.14675	0.000476667	-10.0966	0.00382984	down	AT5G06530	ABC-2 type transporter family protein
Ghir_A02G014080	0.992242	4.01874	2.09778	0.00104224	up	AT3G02910	AIG2-like (avirulence induced gene) family protein
Ghir_A02G014180	2.64681	21.4909	3.10646	1.43174e-19	up	AT2G23910	NAD(P)-binding Rossmann-fold superfamily protein
Ghir_A02G014390	0.0503697	0.834245	4.09202	0.00143815	up	AT5G65300	unknown protein; Has 30201 Blast hits to 17322 proteins in 780 species: Archae - 12; Bacteria - 1396; Metazoa - 17338; Fungi - 3422; Plants - 5037; Viruses - 0; Other Eukaryotes - 2996 (source: NCBI BLink).
Ghir_A02G014450	1.30084	0.106183	-3.54518	0.0195729	down	AT1G74100	sulfotransferase 16
Ghir_A02G014620	4.88441	12.3743	1.40775	0.000131884	up
Ghir_A02G014910	0.393147	0.0758117	-2.2966	0.0244845	down	AT4G14540	nuclear factor Y, subunit B3
Ghir_A02G014960	6.53429	2.99752	-1.05013	0.00329171	down	AT5G64860	disproportionating enzyme
Ghir_A02G015020	2.16815	7.06079	1.78888	0.0135805	up	AT5G09960	FUNCTIONS IN: molecular_function unknown; INVOLVED IN: biological_process unknown; LOCATED IN: plasma membrane; EXPRESSED IN: 22 plant structures; EXPRESSED DURING: 13 growth stages; CONTAINS InterPro DOMAIN/s: RPM1-interacting protein 4, defence response (InterPro:IPR008700); BEST Arabidopsis thaliana protein match is: unknown protein (TAIR:AT5G64850.1); Has 30201 Blast hits to 17322 proteins in…
Ghir_A02G015170	0.192149	0.794957	2.13463	0.038916	up	AT5G61890	Integrase-type DNA-binding superfamily protein
Ghir_A02G015210	0.319081	4.49434	3.91235	0.0302312	up
Ghir_A02G015600	2.01157	0	-30.9217	2.15712e-06	down	AT4G17720	RNA-binding (RRM/RBD/RNP motifs) family protein
Ghir_A02G015640	1.12598	2.69125	1.33543	0.00199947	up	AT3G02970	EXORDIUM like 6
Ghir_A02G015880	2.77293	9.62137	1.88296	1.72887e-07	up	AT4G39840	unknown protein; FUNCTIONS IN: molecular_function unknown; INVOLVED IN: biological_process unknown; LOCATED IN: endomembrane system; EXPRESSED IN: 23 plant structures; EXPRESSED DURING: 13 growth stages; Has 20719 Blast hits to 6096 proteins in 607 species: Archae - 22; Bacteria - 3243; Metazoa - 4364; Fungi - 2270; Plants - 237; Viruses - 128; Other Eukaryotes - 10455 (source: NCBI BLink).
Ghir_A02G016000	0.772091	0.0155047	-5.50822	0.0228649	down	AT5G65500	U-box domain-containing protein kinase family protein
Ghir_A02G016010	0	2.15435	24.5638	1.40887e-05	up	AT5G65495	unknown protein; Has 9 Blast hits to 9 proteins in 5 species: Archae - 0; Bacteria - 0; Metazoa - 0; Fungi - 0; Plants - 9; Viruses - 0; Other Eukaryotes - 0 (source: NCBI BLink).
Ghir_A02G016160	2.74538	13.3435	2.35064	4.09635e-08	up
Ghir_A02G016690	13.2768	6.26232	-1.01996	0.0455511	down	AT4G37650	GRAS family transcription factor
Ghir_A02G016820	0.739567	20.3849	4.85498	5.58626e-09	up	AT5G67400	root hair specific 19
Ghir_A02G017530	1.52027	0.359593	-1.9804	0.0459128	down	AT3G50410	OBF binding protein 1
Ghir_A02G017970	2.13057	9.51466	2.23409	0.047828	up	AT2G18550	homeobox protein 21
Ghir_A02G018040	5.90742	15.8625	1.49519	0.0149714	up	AT3G50690	Leucine-rich repeat (LRR) family protein
Ghir_A02G018050	1.45438	0.0961343	-3.81714	0.00667428	down	AT3G50685	unknown protein; Has 52 Blast hits to 46 proteins in 20 species: Archae - 0; Bacteria - 0; Metazoa - 0; Fungi - 0; Plants - 45; Viruses - 0; Other Eukaryotes - 7 (source: NCBI BLink).
Ghir_A02G019010	1.91288	5.3811	1.57637	1.88312e-06	up	AT2G17705	unknown protein; FUNCTIONS IN: molecular_function unknown; INVOLVED IN: biological_process unknown; LOCATED IN: plasma membrane; EXPRESSED IN: cultured cell; BEST Arabidopsis thaliana protein match is: unknown protein (TAIR:AT4G08330.1); Has 135 Blast hits to 135 proteins in 32 species: Archae - 5; Bacteria - 29; Metazoa - 0; Fungi - 0; Plants - 91; Viruses - 0; Other Eukaryotes - 10 (source: NCB…
Ghir_A02G019160	0.0949933	0.546684	2.58976	0.0306829	up	AT2G17080	Arabidopsis protein of unknown function (DUF241)
Ghir_A02G019520	0.324238	0.0380107	-3.0175	0.00029171	down	AT1G20925	Auxin efflux carrier family protein
Ghir_A03G000510	0.0326487	0.23165	2.86912	0.00219003	up	AT5G56640	myo-inositol oxygenase 5
Ghir_A03G000550	0.170589	1.54219	3.21593	0.00273925	up
Ghir_A03G001170	12.4174	157.232	3.75174	3.87669e-11	up	AT5G47230	ethylene responsive element binding factor 5
Ghir_A03G001180	0.711599	0.064636	-3.3461	4.22858e-09	down	AT5G47240	nudix hydrolase homolog 8
Ghir_A03G001480	0.155595	3.42219	4.54156	8.82723e-06	up	AT1G12110	nitrate transporter 1.1
Ghir_A03G002040	0.00321633	0.41025	7.14495	2.28943e-07	up	AT5G60900	receptor-like protein kinase 1
Ghir_A03G002860	0.474087	4.87373	3.44758	9.7819e-07	up	AT5G57240	OSBP(oxysterol binding protein)-related protein 4C
Ghir_A03G003120	0	0.0747067	6.04932	0.00962474	up	AT1G06930	unknown protein; Has 4478 Blast hits to 355 proteins in 82 species: Archae - 0; Bacteria - 29; Metazoa - 379; Fungi - 125; Plants - 120; Viruses - 25; Other Eukaryotes - 3800 (source: NCBI BLink).
Ghir_A03G003570	0.210898	0.76599	1.93464	0.0231217	up	AT1G07150	mitogen-activated protein kinase kinase kinase 13
Ghir_A03G003580	0.0571573	1.14526	4.42798	0.0130155	up	AT2G30020	Protein phosphatase 2C family protein
Ghir_A03G003660	0	0.331268	8.69285	0.00066801	up	AT2G36870	xyloglucan endotransglucosylase/hydrolase 32
Ghir_A03G004010	4.44845	0.996518	-2.08016	0.00686051	down	AT2G28350	auxin response factor 10
Ghir_A03G004180	9.33069	3.56284	-1.30712	0.0242486	down	AT5G21160	LA RNA-binding protein
Ghir_A03G004220	5.77031	46.3905	3.10541	2.28341e-07	up	AT2G27080	Late embryogenesis abundant (LEA) hydroxyproline-rich glycoprotein family
Ghir_A03G004270	0.398996	3.02441	3.04691	0.00499679	up	AT3G45640	mitogen-activated protein kinase 3
Ghir_A03G004440	0.53812	26.1539	5.71045	0.00138017	up	AT1G07400	HSP20-like chaperones superfamily protein
Ghir_A03G004640	0.52856	13.5694	4.77028	0.000381618	up	AT5G59820	C2H2-type zinc finger family protein
Ghir_A03G004910	0.69932	0.125638	-2.38752	0.00519596	down	AT3G55370	OBF-binding protein 3
Ghir_A03G005320	8.90282	61.0559	2.86845	4.46067e-18	up	AT3G46620	zinc finger (C3HC4-type RING finger) family protein
Ghir_A03G005890	1.34823	0.514316	-1.3105	0.042274	down	AT2G29650	phosphate transporter 4;1
Ghir_A03G006130	0.0125673	0.0631013	2.24553	0.0375557	up	AT5G24318	O-Glycosyl hydrolases family 17 protein
Ghir_A03G006300	0.425027	0.002237	-7.20458	0.0191976	down	AT5G63520	CONTAINS InterPro DOMAIN/s: F-box domain, Skp2-like (InterPro:IPR022364), FIST C domain (InterPro:IPR019494), FIST domain, N-terminal (InterPro:IPR013702); Has 137 Blast hits to 137 proteins in 56 species: Archae - 0; Bacteria - 88; Metazoa - 6; Fungi - 0; Plants - 32; Viruses - 0; Other Eukaryotes - 11 (source: NCBI BLink).
Ghir_A03G006430	0.0447353	0.191349	2.08817	0.0421312	up	AT5G50710	unknown protein; BEST Arabidopsis thaliana protein match is: unknown protein (TAIR:AT5G50610.1); Has 30201 Blast hits to 17322 proteins in 780 species: Archae - 12; Bacteria - 1396; Metazoa - 17338; Fungi - 3422; Plants - 5037; Viruses - 0; Other Eukaryotes - 2996 (source: NCBI BLink).
Ghir_A03G006800	0.529335	16.6072	5.00182	0.00945247	up	AT5G62350	Plant invertase/pectin methylesterase inhibitor superfamily protein
Ghir_A03G007060	9.11411	151.639	4.14224	4.07803e-05	up	AT5G51190	Integrase-type DNA-binding superfamily protein
Ghir_A03G007430	0.112342	7.15706	6.057	2.91594e-27	up	AT1G67750	Pectate lyase family protein
Ghir_A03G007820	25.8593	11.7996	-1.05519	3.52106e-05	down	AT1G74470	Pyridine nucleotide-disulphide oxidoreductase family protein
Ghir_A03G007980	0	0.853149	10.1433	2.73842e-13	up	AT2G03350	Protein of unknown function, DUF538
Ghir_A03G008810	1.97337	6.20336	1.74972	2.06708e-05	up	AT5G62620	Galactosyltransferase family protein
Ghir_A03G009000	0	0.468234	28.0274	4.34285e-16	up	AT1G75220	Major facilitator superfamily protein
Ghir_A03G009300	2.97139	8.13074	1.56439	0.0432594	up	AT1G45688	unknown protein; FUNCTIONS IN: molecular_function unknown; INVOLVED IN: biological_process unknown; LOCATED IN: plasma membrane; EXPRESSED IN: 22 plant structures; EXPRESSED DURING: 13 growth stages; BEST Arabidopsis thaliana protein match is: unknown protein (TAIR:AT5G42860.1); Has 258 Blast hits to 242 proteins in 39 species: Archae - 0; Bacteria - 11; Metazoa - 10; Fungi - 14; Plants - 198; Vi…
Ghir_A03G009750	0.385968	0.982994	1.40771	0.0348197	up	ATCG00150	ATPase, F0 complex, subunit A protein
Ghir_A03G010240	20.7678	7.96102	-1.31076	0.00962316	down	AT1G17840	white-brown complex homolog protein 11
Ghir_A03G010320	4.03552	32.5111	3.10725	8.27098e-08	up	AT1G18300	nudix hydrolase homolog 4
Ghir_A03G010460	35.1419	13.0592	-1.35893	0.0039114	down	AT3G18000	S-adenosyl-L-methionine-dependent methyltransferases superfamily protein
Ghir_A03G010670	0	0.06012	5.70641	0.0326503	up	AT4G13930	serine hydroxymethyltransferase 4
Ghir_A03G010930	4.13988	16.5897	2.07867	5.90615e-14	up	AT1G70370	polygalacturonase 2
Ghir_A03G010970	3.6754	10.9006	1.69136	0.0140783	up	AT1G13340	Regulator of Vps4 activity in the MVB pathway protein
Ghir_A03G011280	0.89392	0.099102	-3.0952	0.0178629	down	AT1G14290	sphingoid base hydroxylase 2
Ghir_A03G011290	1.89077	0.263333	-2.77398	9.22758e-06	down	AT1G14290	sphingoid base hydroxylase 2
Ghir_A03G011310	0	0.561318	29.743	6.44957e-06	up	AT2G02950	phytochrome kinase substrate 1
Ghir_A03G012020	0	0.115537	6.76544	0.0017881	up
Ghir_A03G012730	0.152959	0.56314	1.98892	0.0340276	up	AT2G02010	glutamate decarboxylase 4
Ghir_A03G013350	0	6.97349	12.0522	1.65582e-05	up	AT3G60670	PLATZ transcription factor family protein
Ghir_A03G013420	0.0339347	0.475281	3.89022	1.48923e-05	up	AT1G14870	PLANT CADMIUM RESISTANCE 2
Ghir_A03G013500	1.44187	6.87485	2.32723	0.00275592	up	AT1G14890	Plant invertase/pectin methylesterase inhibitor superfamily protein
Ghir_A03G013510	4.0927	1.42531	-1.43434	6.16116e-09	down	AT1G70710	glycosyl hydrolase 9B1
Ghir_A03G013890	0.0282593	0.732307	4.83286	0.00962474	up	AT2G01300	unknown protein; BEST Arabidopsis thaliana protein match is: unknown protein (TAIR:AT1G15010.1); Has 73 Blast hits to 73 proteins in 12 species: Archae - 0; Bacteria - 0; Metazoa - 0; Fungi - 0; Plants - 73; Viruses - 0; Other Eukaryotes - 0 (source: NCBI BLink).
Ghir_A03G013920	1.67031	5.53038	1.83375	0.0236055	up	AT1G71110	unknown protein; FUNCTIONS IN: molecular_function unknown; INVOLVED IN: biological_process unknown; LOCATED IN: endomembrane system; BEST Arabidopsis thaliana protein match is: unknown protein (TAIR:AT2G12400.1); Has 173 Blast hits to 169 proteins in 21 species: Archae - 0; Bacteria - 0; Metazoa - 3; Fungi - 0; Plants - 165; Viruses - 0; Other Eukaryotes - 5 (source: NCBI BLink).
Ghir_A03G014090	2.91681	6.44777	1.22771	0.0306829	up	AT1G67340	HCP-like superfamily protein with MYND-type zinc finger
Ghir_A03G014250	6.23299	2.13673	-1.47042	0.00112728	down	AT1G67510	Leucine-rich repeat protein kinase family protein
Ghir_A03G014520	0.650692	0.0151963	-5.35043	6.44322e-08	down	AT1G24430	HXXXD-type acyl-transferase family protein
Ghir_A03G014580	0.817338	7.15963	3.22638	0.035313	up	AT5G55850	RPM1-interacting protein 4 (RIN4) family protein
Ghir_A03G015480	3.14114	15.7684	2.41739	1.86393e-06	up	AT1G23710	Protein of unknown function (DUF1645)
Ghir_A03G015850	30.8886	170.115	2.5464	0.000182566	up	AT1G24020	MLP-like protein 423
Ghir_A03G016230	1.64409	4.19138	1.41812	0.0166722	up	AT1G10380	Putative membrane lipoprotein
Ghir_A03G016590	11.6979	3.78486	-1.53527	0.00542447	down	AT2G01210	Leucine-rich repeat protein kinase family protein
Ghir_A03G016690	1.35764	7.32636	2.50754	0.00242828	up	AT1G12060	BCL-2-associated athanogene 5
Ghir_A03G017270	5.87062	37.7987	2.77753	5.5803e-08	up	AT5G44210	erf domain protein 9
Ghir_A03G018050	14.3513	40.4131	1.57232	2.78871e-07	up	AT3G21890	B-box type zinc finger family protein
Ghir_A03G018100	1.27548	0.181527	-2.72018	0.00338255	down	AT3G21810	Zinc finger C-x8-C-x5-C-x3-H type family protein
Ghir_A03G018280	0.168645	0.00264967	-5.88298	0.0471556	down	AT3G19950	RING/U-box superfamily protein
Ghir_A03G018910	4.33091	0.213043	-4.28311	0.0020903	down	AT5G64570	beta-D-xylosidase 4
Ghir_A03G019230	0.766727	0	-26.6343	2.23752e-10	down	AT5G09420	translocon at the outer membrane of chloroplasts 64-V
Ghir_A03G019380	0.126192	0	-7.24572	0.0392966	down	AT3G26040	HXXXD-type acyl-transferase family protein
Ghir_A03G019420	1.87239	33.3186	4.2479	9.20148e-07	up	AT4G24570	dicarboxylate carrier 2
Ghir_A03G019490	0.00982667	0.648392	5.88421	0.0261957	up
Ghir_A03G019500	0.00867933	0.619857	5.9921	0.0342862	up
Ghir_A03G019730	5.04232	13.9011	1.55364	0.0163393	up	AT1G11760	MED32; Has 41 Blast hits to 40 proteins in 14 species: Archae - 0; Bacteria - 0; Metazoa - 0; Fungi - 0; Plants - 41; Viruses - 0; Other Eukaryotes - 0 (source: NCBI BLink).
Ghir_A03G019970	0.00722767	14.654	10.5467	6.20808e-15	up	AT3G18280	Bifunctional inhibitor/lipid-transfer protein/seed storage 2S albumin superfamily protein
Ghir_A03G020130	0.127304	2.56881	4.41074	4.94086e-05	up	AT1G27730	salt tolerance zinc finger
Ghir_A03G020190	6.2604	56.2745	3.27403	3.48917e-11	up	AT4G33920	Protein phosphatase 2C family protein
Ghir_A03G020320	1.52003	25.5274	4.16212	3.53472e-17	up	AT2G14960	Auxin-responsive GH3 family protein
Ghir_A03G020660	2.54637	5.16297	1.09851	0.030144	up	AT1G49780	plant U-box 26
Ghir_A03G020880	0.695779	2.0893	1.64735	0.0348045	up	AT1G49500	unknown protein; FUNCTIONS IN: molecular_function unknown; INVOLVED IN: biological_process unknown; LOCATED IN: endomembrane system; EXPRESSED IN: 19 plant structures; EXPRESSED DURING: 10 growth stages; BEST Arabidopsis thaliana protein match is: unknown protein (TAIR:AT3G19030.1); Has 24 Blast hits to 24 proteins in 2 species: Archae - 0; Bacteria - 0; Metazoa - 0; Fungi - 0; Plants - 24; Virus…
Ghir_A03G021120	1.39605	0.141322	-3.23225	0.0477013	down	AT1G60950	2Fe-2S ferredoxin-like superfamily protein
Ghir_A03G021330	74.0779	6.96241	-3.34111	3.8801e-07	down	AT4G39250	RAD-like 1
Ghir_A03G021600	0.0841773	0	-7.69249	0.000464157	down	AT4G36360	beta-galactosidase 3
Ghir_A03G021830	0.458759	0	-26.0705	9.89151e-06	down	AT1G32120	FUNCTIONS IN: molecular_function unknown; INVOLVED IN: biological_process unknown; LOCATED IN: membrane; EXPRESSED IN: 14 plant structures; EXPRESSED DURING: 4 anthesis, C globular stage, F mature embryo stage, petal differentiation and expansion stage, E expanded cotyledon stage; CONTAINS InterPro DOMAIN/s: Aminotransferase-like, plant mobile domain (InterPro:IPR019557), Protein of unknown funct…
Ghir_A03G022030	0.0375313	0.195004	2.2974	0.0340314	up	AT2G21210	SAUR-like auxin-responsive protein family
Ghir_A03G022160	0.266537	0.903376	1.8064	0.000294922	up	AT4G38690	PLC-like phosphodiesterases superfamily protein
Ghir_A03G022250	3.6186	1.6857	-1.02904	0.000153002	down	AT3G51260	20S proteasome alpha subunit PAD1
Ghir_A03G022400	2.47446	21.4197	3.20807	2.84869e-10	up	AT3G52520	unknown protein; BEST Arabidopsis thaliana protein match is: unknown protein (TAIR:AT5G06280.3); Has 24 Blast hits to 24 proteins in 7 species: Archae - 0; Bacteria - 0; Metazoa - 0; Fungi - 0; Plants - 24; Viruses - 0; Other Eukaryotes - 0 (source: NCBI BLink).
Ghir_A03G022610	0.341606	1.67415	2.37564	0.0002117	up	AT2G17040	NAC domain containing protein 36
Ghir_A03G022770	0.062583	1.40084	4.53106	2.07345e-06	up	AT1G25270	nodulin MtN21 /EamA-like transporter family protein
Ghir_A03G022960	0.639461	2.38616	1.96237	0.00289383	up	AT1G49310	unknown protein; FUNCTIONS IN: molecular_function unknown; INVOLVED IN: biological_process unknown; LOCATED IN: endomembrane system; EXPRESSED IN: 9 plant structures; EXPRESSED DURING: LP.04 four leaves visible, petal differentiation and expansion stage; Has 11 Blast hits to 11 proteins in 6 species: Archae - 0; Bacteria - 0; Metazoa - 0; Fungi - 0; Plants - 11; Viruses - 0; Other Eukaryotes - 0 …
Ghir_A03G022980	0.187799	0	-7.56078	0.000556094	down	AT1G49320	unknown seed protein like 1
Ghir_A03G023160	0.108201	0.76743	2.93937	0.00080608	up	AT2G26490	Transducin/WD40 repeat-like superfamily protein
Ghir_A03G023260	0.0248317	0.399484	4.01949	0.00443808	up	AT4G34940	armadillo repeat only 1
Ghir_A03G023420	3.44514	8.73948	1.42669	0.041413	up	AT1G68470	Exostosin family protein
Ghir_A03G023450	9.30717	3.42041	-1.37131	5.90851e-05	down	AT2G34670	Protein of unknown function (DUF630 and DUF632)
Ghir_A03G023460	8.58508	0.769685	-3.39233	0.00273365	down	AT4G05420	damaged DNA binding protein 1A
Ghir_A04G000170	0.496694	1.78737	1.91821	0.0187543	up
Ghir_A04G000200	1.78754	0.137153	-3.63027	0.009007	down	AT1G55670	photosystem I subunit G
Ghir_A04G001030	2.75684	1.06667	-1.28821	0.00437347	down	AT5G55410	Bifunctional inhibitor/lipid-transfer protein/seed storage 2S albumin superfamily protein
Ghir_A04G001190	0	2.43431	27.0965	1.11323e-06	up	AT5G55180	O-Glycosyl hydrolases family 17 protein
Ghir_A04G001920	3.17159	26.5413	3.15128	9.40519e-18	up	AT5G54850	unknown protein; Has 1807 Blast hits to 1807 proteins in 277 species: Archae - 0; Bacteria - 0; Metazoa - 736; Fungi - 347; Plants - 385; Viruses - 0; Other Eukaryotes - 339 (source: NCBI BLink).
Ghir_A04G002000	1.06534	0.190452	-2.41638	0.00991711	down	AT3G20570	early nodulin-like protein 9
Ghir_A04G002230	1.74844	8.08096	2.3138	3.44481e-05	up	AT1G50600	scarecrow-like 5
Ghir_A04G002450	4.68342	10.7883	1.28791	0.00024786	up	AT4G27270	Quinone reductase family protein
Ghir_A04G002570	0	0.684067	27.6437	3.80781e-05	up	AT5G11340	Acyl-CoA N-acyltransferases (NAT) superfamily protein
Ghir_A04G002780	2.30408	11.2006	2.37482	2.76212e-06	up	AT5G54400	S-adenosyl-L-methionine-dependent methyltransferases superfamily protein
Ghir_A04G002860	0	0.0451637	6.73536	0.0128385	up	AT4G27420	ABC-2 type transporter family protein
Ghir_A04G002870	7.88109	21.776	1.54441	0.0225664	up
Ghir_A04G003230	1.68732	4.09355	1.35466	0.0454708	up	AT3G15352	cytochrome c oxidase 17
Ghir_A04G003340	0.17086	0	-44.7389	2.35866e-13	down	AT5G53870	early nodulin-like protein 1
Ghir_A04G003520	0.597914	0	-26.893	1.20038e-12	down	AT1G62930	Tetratricopeptide repeat (TPR)-like superfamily protein
Ghir_A04G003630	47.554	202.991	2.18725	0.000393465	up	AT3G15210	ethylene responsive element binding factor 4
Ghir_A04G003650	10.7558	0.703995	-3.82256	0.0236824	down	AT3G15180	ARM repeat superfamily protein
Ghir_A04G004000	0.355247	2.37608	2.8123	8.65582e-11	up	ATCG01280	Chloroplast Ycf2;ATPase, AAA type, core
Ghir_A04G004030	0.0462293	8.0499	7.4241	1.60809e-05	up	ATCG00020	photosystem II reaction center protein A
Ghir_A04G004050	2.89864	23.5717	3.0959	1.58919e-05	up	ATCG00070	photosystem II reaction center protein K precursor
Ghir_A04G004540	0.096888	0.006915	-3.60301	0.044816	down
Ghir_A04G005120	1.86395	0.706224	-1.32696	0.00687314	down	AT3G12920	SBP (S-ribonuclease binding protein) family protein
Ghir_A04G005470	5.04863	19.8777	2.08731	0.00180625	up	AT3G11820	syntaxin of plants 121
Ghir_A04G006410	8.15792	23.8483	1.61706	1.30131e-16	up	AT3G11660	NDR1/HIN1-like 1
Ghir_A04G006500	0.179929	3.49654	4.34534	3.06168e-11	up	AT2G36090	F-box family protein
Ghir_A04G006790	0.0217213	0.518384	4.56531	0.00751572	up	AT2G36305	farnesylated protein-converting enzyme 2
Ghir_A04G006940	1.26109	2.95122	1.31003	0.00220359	up	AT3G52710	unknown protein; FUNCTIONS IN: molecular_function unknown; INVOLVED IN: biological_process unknown; LOCATED IN: plasma membrane; EXPRESSED IN: 19 plant structures; EXPRESSED DURING: 9 growth stages; BEST Arabidopsis thaliana protein match is: unknown protein (TAIR:AT2G36220.1); Has 64 Blast hits to 64 proteins in 10 species: Archae - 0; Bacteria - 0; Metazoa - 0; Fungi - 0; Plants - 64; Viruses -…
Ghir_A04G007130	2.14027	16.7094	3.04557	3.06376e-11	up	AT3G52610	unknown protein; Has 68 Blast hits to 67 proteins in 21 species: Archae - 0; Bacteria - 11; Metazoa - 0; Fungi - 0; Plants - 55; Viruses - 0; Other Eukaryotes - 2 (source: NCBI BLink).
Ghir_A04G007160	6.13495	2.79095	-1.0587	0.00250681	down	AT5G03650	starch branching enzyme 2.2
Ghir_A04G007620	1.75848	0.707609	-1.22601	0.0020903	down	AT2G36680	Modifier of rudimentary (Mod(r)) protein
Ghir_A04G007700	4.04365	11.949	1.63997	7.94948e-08	up	AT2G36760	UDP-glucosyl transferase 73C2
Ghir_A04G007780	2.57875	1.21605	-1.00483	0.0131733	down	AT3G09920	phosphatidyl inositol monophosphate 5 kinase
Ghir_A04G007900	2.6977	0.644635	-1.96718	0.000533759	down	AT2G36870	xyloglucan endotransglucosylase/hydrolase 32
Ghir_A04G008240	1.14352	2.26016	1.05553	0.0197138	up	AT5G03230	Protein of unknown function, DUF584
Ghir_A04G008450	0.841417	2.54476	1.67993	0.00015371	up	AT5G03040	IQ-domain 2
Ghir_A04G008670	0.243077	0.0637763	-1.83165	0.0274087	down	AT3G09550	Ankyrin repeat family protein
Ghir_A04G008740	0.353781	0.0390193	-3.06609	0.0228504	down	AT3G53570	FUS3-complementing gene 1
Ghir_A04G009370	4.01137	16.9308	2.15489	0.0016685	up	AT3G53990	Adenine nucleotide alpha hydrolases-like superfamily protein
Ghir_A04G009750	0.0308987	0	-5.74005	0.0342481	down	AT3G09020	alpha 1,4-glycosyltransferase family protein
Ghir_A04G009940	0.022733	0.367779	4.14356	0.0354742	up
Ghir_A04G009950	0.0519183	1.96987	5.25176	8.97748e-13	up	AT5G01370	ALC-interacting protein 1
Ghir_A04G010370	0.0258967	1.27575	5.58957	0.000520818	up	AT5G01700	Protein phosphatase 2C family protein
Ghir_A04G010380	8.19752	22.6798	1.55657	3.06343e-05	up	AT5G01710	methyltransferases
Ghir_A04G010400	1.00647	12.9647	3.79101	1.00415e-06	up	AT2G38470	WRKY DNA-binding protein 33
Ghir_A04G010530	4.27559	9.94895	1.32656	0.0128138	up	AT1G59710	Protein of unknown function (DUF569)
Ghir_A04G011060	0	0.791078	9.55135	0.000356345	up	AT4G15800	ralf-like 33
Ghir_A04G011460	0	1.01916	10.2574	0.0148244	up	AT2G31180	myb domain protein 14
Ghir_A04G012010	2.82643	1.24096	-1.10711	0.00095929	down	AT4G38220	Peptidase M20/M25/M40 family protein
Ghir_A04G012410	0.668996	2.59108	2.03971	8.66936e-06	up	AT4G33565	RING/U-box superfamily protein
Ghir_A04G012600	0.030649	0.504606	4.03938	4.39436e-05	up	AT2G23970	Class I glutamine amidotransferase-like superfamily protein
Ghir_A04G012950	76.6696	339.084	2.23832	1.39813e-07	up	AT5G59845	Gibberellin-regulated family protein
Ghir_A04G013080	0.0645477	0.16599	1.44457	0.0278436	up	AT3G55350	PIF / Ping-Pong family of plant transposases
Ghir_A04G013330	0.199491	5.86694	4.94372	1.99432e-07	up
Ghir_A04G013400	0.00425933	0.31357	6.073	5.49706e-05	up	AT2G21140	proline-rich protein 2
Ghir_A04G013530	0.029065	4.78907	7.2642	0.000206028	up	AT2G21490	dehydrin LEA
Ghir_A04G014210	0.653515	1.58516	1.39242	0.0459946	up	AT2G23460	extra-large G-protein 1
Ghir_A04G014760	1.37595	11.4411	3.14928	0.000106566	up	AT1G70420	Protein of unknown function (DUF1645)
Ghir_A04G015460	1.80595	3.48983	1.02888	0.00188929	up	AT1G70670	Caleosin-related family protein
Ghir_A04G015520	0.402079	0.00304033	-6.78147	0.00663432	down	AT2G01730	cleavage and polyadenylation specificity factor 73 kDa subunit-II
Ghir_A04G015870	0.372371	1.76543	2.28713	0.0143559	up	AT1G69420	DHHC-type zinc finger family protein
Ghir_A04G015960	0.234108	0.0370597	-2.53296	0.0102899	down	AT1G69580	Homeodomain-like superfamily protein
Ghir_A05G000220	0.0232077	0.793873	5.11017	0.0269131	up	AT5G57150	basic helix-loop-helix (bHLH) DNA-binding superfamily protein
Ghir_A05G000500	8.56778	1.41012	-2.52081	0.0233753	down	AT4G30200	vernalization5/VIN3-like
Ghir_A05G000600	0.398509	3.81286	3.31551	6.12629e-07	up	AT4G25830	Uncharacterised protein family (UPF0497)
Ghir_A05G000640	2.85536	35.0069	3.72773	0.0432594	up	AT5G57560	Xyloglucan endotransglucosylase/hydrolase family protein
Ghir_A05G000860	1.46842	0.446016	-1.6275	0.0181992	down	AT3G02470	S-adenosylmethionine decarboxylase
Ghir_A05G001080	18.478	8.59239	-1.02803	0.00144848	down	AT3G55430	O-Glycosyl hydrolases family 17 protein
Ghir_A05G001100	3.75319	0.797047	-2.17141	0.000424468	down	AT5G11320	Flavin-binding monooxygenase family protein
Ghir_A05G001490	0.206821	0.981844	2.35536	0.0342552	up	AT2G11520	calmodulin-binding receptor-like cytoplasmic kinase 3
Ghir_A05G001610	0.108863	0	-7.12616	0.0003451	down	AT2G26580	plant-specific transcription factor YABBY family protein
Ghir_A05G001690	0.0397407	0	-5.74035	0.00192058	down	AT1G15360	Integrase-type DNA-binding superfamily protein
Ghir_A05G001850	0.011474	0.475901	5.38613	4.46049e-10	up	AT2G30300	Major facilitator superfamily protein
Ghir_A05G002210	0	0.339918	7.87076	0.00177172	up	AT4G13395	ROTUNDIFOLIA like 12
Ghir_A05G002420	0.503883	2.16894	2.15926	0.0198546	up	AT4G13250	NAD(P)-binding Rossmann-fold superfamily protein
Ghir_A05G002650	1.44288	0.550503	-1.30565	0.038369	down	AT2G20010	Protein of unknown function (DUF810)
Ghir_A05G002930	35.3834	77.5034	1.20703	0.00832576	up	AT4G29430	ribosomal protein S15A E
Ghir_A05G003080	5.72038	1.83705	-1.56514	1.07834e-11	down	AT4G29720	polyamine oxidase 5
Ghir_A05G003480	2.78429	0.28875	-3.16712	7.10655e-10	down	AT5G20630	germin 3
Ghir_A05G003600	1.6844	5.34482	1.75653	0.00425815	up	AT1G19180	jasmonate-zim-domain protein 1
Ghir_A05G003620	0.218216	1.07441	2.39161	8.90643e-10	up	AT1G19210	Integrase-type DNA-binding superfamily protein
Ghir_A05G003880	2.45559	7.75577	1.74033	0.000220505	up	AT5G20885	RING/U-box superfamily protein
Ghir_A05G004410	0.484543	2.79846	2.60825	3.31748e-05	up	AT1G10970	zinc transporter 4 precursor
Ghir_A05G004420	0.009702	7.64601	9.91719	9.51146e-20	up
Ghir_A05G005110	7.70281	37.8556	2.37158	7.57561e-11	up	AT5G25610	BURP domain-containing protein
Ghir_A05G005170	0.191171	0.00178967	-5.40189	0.013498	down	AT4G32660	Protein kinase superfamily protein
Ghir_A05G005530	0.136055	4.13227	4.96582	0.0341053	up	AT2G23990	early nodulin-like protein 11
Ghir_A05G005990	0.918801	3.64785	2.08969	0.000146324	up	AT5G11000	Plant protein of unknown function (DUF868)
Ghir_A05G006020	6.09299	2.73234	-1.08015	9.85856e-05	down	AT2G25180	response regulator 12
Ghir_A05G006120	0.421065	25.4995	6.01404	0.00141375	up	AT1G80840	WRKY DNA-binding protein 40
Ghir_A05G006290	2.7169	1.16762	-1.14517	0.00335943	down	AT2G24820	translocon at the inner envelope membrane of chloroplasts 55-II
Ghir_A05G006590	0.230425	1.84594	3.092	0.0242905	up	AT5G10695	unknown protein; BEST Arabidopsis thaliana protein match is: unknown protein (TAIR:AT5G57123.1); Has 30201 Blast hits to 17322 proteins in 780 species: Archae - 12; Bacteria - 1396; Metazoa - 17338; Fungi - 3422; Plants - 5037; Viruses - 0; Other Eukaryotes - 2996 (source: NCBI BLink).
Ghir_A05G007470	2.01149	4.80527	1.35255	0.0122193	up	AT1G14370	protein kinase 2A
Ghir_A05G007810	0.197786	1.40356	2.90592	2.89037e-07	up	AT4G03210	xyloglucan endotransglucosylase/hydrolase 9
Ghir_A05G008100	0.0379447	0.132965	1.88983	0.0307704	up	AT2G35940	BEL1-like homeodomain 1
Ghir_A05G008250	0	0.08195	6.12125	0.00962474	up	AT2G02990	ribonuclease 1
Ghir_A05G008500	31.0895	71.8266	1.30315	6.98778e-05	up	AT2G27580	A20/AN1-like zinc finger family protein
Ghir_A05G008660	26.5794	3.14128	-3.00994	0.0046493	down	AT5G22580	Stress responsive A/B Barrel Domain
Ghir_A05G008970	0.0327273	0.709995	4.444	0.000145182	up	AT1G20780	senescence-associated E3 ubiquitin ligase 1
Ghir_A05G009390	0.18529	2.26829	3.68895	2.01237e-09	up	AT5G59050	unknown protein; BEST Arabidopsis thaliana protein match is: unknown protein (TAIR:AT3G54000.1); Has 35333 Blast hits to 34131 proteins in 2444 species: Archae - 798; Bacteria - 22429; Metazoa - 974; Fungi - 991; Plants - 531; Viruses - 0; Other Eukaryotes - 9610 (source: NCBI BLink).
Ghir_A05G009870	0.90602	0	-25.2837	0.000244218	down	AT2G37570	HSP20-like chaperones superfamily protein
Ghir_A05G009880	9.38082	50.5242	2.52332	0.0117431	up	AT5G02500	heat shock cognate protein 70-1
Ghir_A05G010050	1.84582	7.22572	2.06196	0.000225766	up	AT5G59730	exocyst subunit exo70 family protein H7
Ghir_A05G010240	0.253831	0.731124	1.5913	0.0463586	up
Ghir_A05G010250	0.0779413	0.87884	3.56836	0.00164979	up
Ghir_A05G010420	4.7299	1.62684	-1.44116	0.000860229	down	AT5G21160	LA RNA-binding protein
Ghir_A05G010560	0.0215803	1.80164	6.46049	3.6922e-05	up	AT5G60660	plasma membrane intrinsic protein 2;4
Ghir_A05G010690	0.00203333	0	-16.6769	1.2294e-06	down	AT2G28260	cyclic nucleotide-gated channel 15
Ghir_A05G010710	0	0.402498	35.9842	7.96842e-13	up	AT2G28250	Protein kinase superfamily protein
Ghir_A05G010980	0.92263	2.29303	1.41109	0.00164446	up	AT5G22930	Protein of unknown function (DUF1635)
Ghir_A05G010990	0.017208	3.50974	7.71856	2.51181e-08	up	AT2G30020	Protein phosphatase 2C family protein
Ghir_A05G011600	0.957354	3.33628	1.88801	0.0020575	up	AT3G54950	patatin-like protein 6
Ghir_A05G012070	0.104344	0.000625333	-6.24115	0.0476574	down	AT1G16060	ARIA-interacting double AP2 domain protein
Ghir_A05G012300	0	0.13975	7.91204	0.00242077	up	AT1G80840	WRKY DNA-binding protein 40
Ghir_A05G012310	1.15179	3.98174	1.87343	0.000113278	up	AT5G25110	CBL-interacting protein kinase 25
Ghir_A05G013150	0.168508	0	-29.3009	4.47569e-06	down	AT1G79990	structural molecules
Ghir_A05G013160	5.85388	1.94501	-1.49665	0.00110681	down	AT3G16000	MAR binding filament-like protein 1
Ghir_A05G013300	3.7668	7.99358	1.15654	0.000165297	up	AT3G16110	PDI-like 1-6
Ghir_A05G013350	5.21299	0.356128	-3.76603	0.0110006	down	AT1G79850	ribosomal protein S17
Ghir_A05G013650	0.0601743	0	-30.4564	7.75937e-12	down	AT3G16490	IQ-domain 26
Ghir_A05G013750	13.365	27.6086	1.14723	0.0442587	up	AT1G17730	vacuolar protein sorting 46.1
Ghir_A05G013850	0	0.0772217	6.60178	0.00411065	up	AT1G17710	Pyridoxal phosphate phosphatase-related protein
Ghir_A05G014360	1.28205	6.38051	2.40558	1.36572e-08	up	AT1G72450	jasmonate-zim-domain protein 6
Ghir_A05G014780	7.47101	2.29904	-1.63443	0.000694376	down	AT1G31330	photosystem I subunit F
Ghir_A05G015120	1.3222	0.466983	-1.43569	0.0114355	down	AT5G14070	Thioredoxin superfamily protein
Ghir_A05G015180	6.60276	1.3689	-2.215	0.000274211	down	AT3G14420	Aldolase-type TIM barrel family protein
Ghir_A05G015860	1.55142	10.9277	2.9047	5.20891e-06	up	AT2G42760	unknown protein; CONTAINS InterPro DOMAIN/s: Protein of unknown function DUF1685 (InterPro:IPR012881); Has 170 Blast hits to 164 proteins in 34 species: Archae - 0; Bacteria - 1; Metazoa - 26; Fungi - 10; Plants - 107; Viruses - 0; Other Eukaryotes - 26 (source: NCBI BLink).
Ghir_A05G016040	2.85713	0.699378	-1.96061	5.57999e-07	down	AT5G45890	senescence-associated gene 12
Ghir_A05G016250	0.891313	2.60719	1.63917	0.000860079	up	AT5G45960	GDSL-like Lipase/Acylhydrolase superfamily protein
Ghir_A05G016310	1.54112	0.0894793	-3.97498	0.0335883	down	AT1G28510	Optic atrophy 3 protein (OPA3)
Ghir_A05G016440	0.447662	7.15972	4.06848	7.75941e-19	up	AT2G33850	unknown protein; FUNCTIONS IN: molecular_function unknown; INVOLVED IN: biological_process unknown; LOCATED IN: endomembrane system; EXPRESSED IN: 17 plant structures; EXPRESSED DURING: 9 growth stages; BEST Arabidopsis thaliana protein match is: unknown protein (TAIR:AT1G28400.1); Has 3053 Blast hits to 2119 proteins in 133 species: Archae - 6; Bacteria - 52; Metazoa - 135; Fungi - 96; Plants - …
Ghir_A05G017620	2.18148	6.02998	1.5447	0.017881	up	AT5G55090	mitogen-activated protein kinase kinase kinase 15
Ghir_A05G018220	0.449355	0.0389243	-3.41132	0.00837427	down	AT1G42970	glyceraldehyde-3-phosphate dehydrogenase B subunit
Ghir_A05G018260	63.005	162.647	1.44228	1.11391e-06	up	AT1G20693	high mobility group B2
Ghir_A05G018420	3.55601	7.40115	1.13107	0.000388988	up	AT1G76250	unknown protein; INVOLVED IN: biological_process unknown; LOCATED IN: endomembrane system; EXPRESSED IN: 6 plant structures; EXPRESSED DURING: 4 anthesis, petal differentiation and expansion stage; Has 74 Blast hits to 74 proteins in 16 species: Archae - 0; Bacteria - 0; Metazoa - 1; Fungi - 0; Plants - 69; Viruses - 0; Other Eukaryotes - 4 (source: NCBI BLink).
Ghir_A05G018430	0.135008	1.00453	2.96952	1.7504e-07	up	AT1G76240	Arabidopsis protein of unknown function (DUF241)
Ghir_A05G019130	0.198156	1.07862	2.51384	0.0176219	up	AT1G75580	SAUR-like auxin-responsive protein family
Ghir_A05G019380	0.0198467	0.515834	4.74976	0.04363	up	AT1G75450	cytokinin oxidase 5
Ghir_A05G020090	2.3274	0.672056	-1.70757	0.0332176	down	AT5G42620	metalloendopeptidases;zinc ion binding
Ghir_A05G020490	8.37223	3.12435	-1.3517	0.031549	down	AT5G42680	Protein of unknown function, DUF617
Ghir_A05G020500	0.642209	3.20532	2.41946	0.0206768	up	AT2G26530	Protein of unknown function (DUF1645)
Ghir_A05G020600	0.131504	0.45255	1.83356	0.0489835	up
Ghir_A05G021020	0.790135	2.50537	1.76157	1.96265e-08	up	AT4G06536	SPla/RYanodine receptor (SPRY) domain-containing protein
Ghir_A05G021200	0.250844	0.913877	1.94589	0.00863953	up
Ghir_A05G021300	0	1.77337	9.848	2.23574e-06	up	AT5G59845	Gibberellin-regulated family protein
Ghir_A05G021390	0.269106	0.045768	-2.4682	0.00062624	down	AT5G01075	Glycosyl hydrolase family 35 protein
Ghir_A05G021410	2.48616	11.0235	2.2296	0.000610681	up	AT4G37540	LOB domain-containing protein 39
Ghir_A05G021420	0.82923	6.48323	3.06378	5.23308e-05	up	AT1G27730	salt tolerance zinc finger
Ghir_A05G021480	1.24135	3.50982	1.59109	0.00061191	up	AT3G01400	ARM repeat superfamily protein
Ghir_A05G021710	0.012439	0.357012	4.73222	0.0220389	up
Ghir_A05G022110	0.168761	0	-7.14426	0.015678	down	AT5G65660	hydroxyproline-rich glycoprotein family protein
Ghir_A05G022390	0.0158517	2.1696	7.03005	0.000846122	up	AT4G24530	O-fucosyltransferase family protein
Ghir_A05G022620	0.334858	1.32112	2.06163	0.0159749	up	AT1G02070	unknown protein; BEST Arabidopsis thaliana protein match is: unknown protein (TAIR:AT3G60520.1); Has 98 Blast hits to 98 proteins in 13 species: Archae - 0; Bacteria - 0; Metazoa - 0; Fungi - 0; Plants - 98; Viruses - 0; Other Eukaryotes - 0 (source: NCBI BLink).
Ghir_A05G023210	57.3392	149.73	1.46801	0.000325	up	AT1G35720	annexin 1
Ghir_A05G023290	0.0427873	0.134565	1.74993	0.042274	up	AT1G36050	Endoplasmic reticulum vesicle transporter protein
Ghir_A05G023870	0.324678	6.50805	4.41519	9.53613e-08	up	AT1G21910	Integrase-type DNA-binding superfamily protein
Ghir_A05G023900	0.354188	1.97024	2.54527	0.0140979	up	AT4G08300	nodulin MtN21 /EamA-like transporter family protein
Ghir_A05G024090	0.100557	1.58994	4.03849	3.19357e-06	up	AT3G57040	response regulator 9
Ghir_A05G025390	1.66622	0.131027	-3.49071	0.0268112	down	AT1G72020	unknown protein; Has 52 Blast hits to 52 proteins in 18 species: Archae - 0; Bacteria - 0; Metazoa - 0; Fungi - 0; Plants - 52; Viruses - 0; Other Eukaryotes - 0 (source: NCBI BLink).
Ghir_A05G025480	0.364491	2.05005	2.57069	0.013184	up	AT3G09880	Protein phosphatase 2A regulatory B subunit family protein
Ghir_A05G025490	0.0119767	0.595204	5.57332	4.49333e-10	up	AT1G71880	sucrose-proton symporter 1
Ghir_A05G025560	0.136664	0.00440067	-4.97495	0.026372	down	AT1G77410	beta-galactosidase 16
Ghir_A05G025720	0.0227403	0.499269	4.5006	0.0345279	up	AT1G71450	Integrase-type DNA-binding superfamily protein
Ghir_A05G026110	0.00502133	0.46855	6.58123	0.00524518	up	AT1G19900	glyoxal oxidase-related protein
Ghir_A05G026300	19.8416	9.35779	-1.00756	8.72183e-05	down	AT1G19480	DNA glycosylase superfamily protein
Ghir_A05G026420	0.138103	0.605571	2.23652	0.0123644	up	AT1G75030	thaumatin-like protein 3
Ghir_A05G026520	0.324103	1.56106	2.34281	0.00208071	up	AT4G37260	myb domain protein 73
Ghir_A05G026610	0.009517	0.06472	2.95007	0.001369	up	AT5G67090	Subtilisin-like serine endopeptidase family protein
Ghir_A05G026670	0.015776	0.41651	4.67752	9.92984e-05	up	AT3G53010	Domain of unknown function (DUF303)
Ghir_A05G026720	0.277442	0.891157	1.75595	0.000699993	up	AT4G37370	cytochrome P450, family 81, subfamily D, polypeptide 8
Ghir_A05G027130	0.37895	1.75534	2.27232	0.0019938	up	AT1G22330	RNA-binding (RRM/RBD/RNP motifs) family protein
Ghir_A05G027360	0	0.00684233	44.2031	1.025e-33	up	AT4G08180	OSBP(oxysterol binding protein)-related protein 1C
Ghir_A05G028330	0.249237	7.96991	5.09681	0.00280747	up	AT3G56400	WRKY DNA-binding protein 70
Ghir_A05G028400	1.092	0.272883	-1.93364	1.29531e-05	down	AT2G40610	expansin A8
Ghir_A05G028500	0.409812	0	-9.76435	0.00542746	down	AT5G58380	SOS3-interacting protein 1
Ghir_A05G029190	3.48363	12.7109	1.94741	0.0490342	up	AT5G22060	DNAJ homologue 2
Ghir_A05G029510	0.431193	0.929637	1.21369	0.021032	up	AT1G66910	Protein kinase superfamily protein
Ghir_A05G030100	0	0.00121433	29.5829	1.12138e-05	up	AT3G09830	Protein kinase superfamily protein
Ghir_A05G030340	4.46046	19.7567	2.2481	0.000862831	up	AT3G54810	Plant-specific GATA-type zinc finger transcription factor family protein
Ghir_A05G030460	0.064612	0	-6.00093	0.00976535	down	AT3G54770	RNA-binding (RRM/RBD/RNP motifs) family protein
Ghir_A05G030860	5.94093	2.62531	-1.10843	0.014576	down	AT1G65520	delta(3), delta(2)-enoyl CoA isomerase 1
Ghir_A05G031130	0.656289	5.86851	3.22607	2.93431e-12	up	AT3G11340	UDP-Glycosyltransferase superfamily protein
Ghir_A05G031210	0.962442	4.35597	2.26883	3.37612e-05	up	AT2G40000	ortholog of sugar beet HS1 PRO-1 2
Ghir_A05G031560	0.653933	0.217036	-1.51342	0.021825	down	AT5G46110	Glucose-6-phosphate/phosphate translocator-related
Ghir_A05G032970	0.002648	0	-18.4721	0.0181789	down	AT3G23670	phragmoplast-associated kinesin-related protein, putative
Ghir_A05G033040	0.084601	0.404804	2.26437	0.0323118	up	ATCG01280	Chloroplast Ycf2;ATPase, AAA type, core
Ghir_A05G033060	0.171007	6.73163	5.27272	0.000524068	up
Ghir_A05G033240	0.069701	1.14479	4.06349	0.00814082	up
Ghir_A05G033260	18.5571	0.766566	-4.50896	0.000643431	down	AT2G01190	Octicosapeptide/Phox/Bem1p family protein
Ghir_A05G033410	15.2861	0.260174	-5.80719	6.32455e-09	down	AT1G68370	Chaperone DnaJ-domain superfamily protein
Ghir_A05G033720	1.6899	24.1891	3.94569	1.41179e-05	up	AT1G70170	matrix metalloproteinase
Ghir_A05G033750	0.266667	0.0639567	-2.00342	0.0368102	down	AT1G24100	UDP-glucosyl transferase 74B1
Ghir_A05G033920	2.49369	44.5538	4.25499	8.01107e-08	up	AT3G03280	unknown protein; FUNCTIONS IN: molecular_function unknown; INVOLVED IN: N-terminal protein myristoylation; LOCATED IN: cellular_component unknown; BEST Arabidopsis thaliana protein match is: unknown protein (TAIR:AT5G17350.1); Has 137 Blast hits to 137 proteins in 11 species: Archae - 0; Bacteria - 0; Metazoa - 0; Fungi - 0; Plants - 137; Viruses - 0; Other Eukaryotes - 0 (source: NCBI BLink).
Ghir_A05G033940	3.70498	9.13701	1.39107	0.000171217	up	AT5G19120	Eukaryotic aspartyl protease family protein
Ghir_A05G034160	0.522046	1.10965	1.15455	0.0347519	up	AT2G40095	Alpha/beta hydrolase related protein
Ghir_A05G034220	0.0209933	0.58627	4.89308	0.00467642	up	AT3G55990	Plant protein of unknown function (DUF828)
Ghir_A05G034300	0.0739913	2.86861	5.39233	8.11428e-11	up	AT2G23290	myb domain protein 70
Ghir_A05G034310	0.0175863	0.346577	4.30885	0.000243903	up	AT2G40230	HXXXD-type acyl-transferase family protein
Ghir_A05G034600	0.00158033	0.131348	5.95517	0.00138017	up	AT1G02205	Fatty acid hydroxylase superfamily
Ghir_A05G034750	0.340757	0.00624633	-5.44978	0.0369368	down	AT5G41110	unknown protein; INVOLVED IN: biological_process unknown; LOCATED IN: chloroplast; BEST Arabidopsis thaliana protein match is: unknown protein (TAIR:AT3G26890.5); Has 1807 Blast hits to 1807 proteins in 277 species: Archae - 0; Bacteria - 0; Metazoa - 736; Fungi - 347; Plants - 385; Viruses - 0; Other Eukaryotes - 339 (source: NCBI BLink).
Ghir_A05G035590	0.598152	0	-25.792	6.45688e-13	down	AT5G02950	Tudor/PWWP/MBT superfamily protein
Ghir_A05G035690	0.0121043	0.203209	4.00976	0.0135309	up	AT2G35770	serine carboxypeptidase-like 28
Ghir_A05G036000	0.578715	0.134208	-2.0059	0.000381228	down	AT1G22360	UDP-glucosyl transferase 85A2
Ghir_A05G036260	0.639143	2.40856	1.96846	0.0120601	up	AT2G39705	ROTUNDIFOLIA like 8
Ghir_A05G036330	25.8651	9.3941	-1.39484	0.0476898	down	AT3G48670	XH/XS domain-containing protein
Ghir_A05G036730	11.6119	24.5768	1.15575	0.0335903	up
Ghir_A05G036950	0	0.371771	28.8598	1.37852e-05	up	AT5G14500	aldose 1-epimerase family protein
Ghir_A05G037480	1.0794	19.5277	4.27029	1.65031e-08	up	AT3G28340	galacturonosyltransferase-like 10
Ghir_A05G037550	2.70892	7.32967	1.53481	0.0495341	up	AT3G28480	Oxoglutarate/iron-dependent oxygenase
Ghir_A05G037850	2.51693	5.00705	1.0858	0.044945	up	AT3G28910	myb domain protein 30
Ghir_A05G037860	0	40.6848	12.8381	1.29338e-16	up
Ghir_A05G037950	0.150744	3.26943	4.52206	0.000724716	up	AT5G39670	Calcium-binding EF-hand family protein
Ghir_A05G037990	1.16062	9.0277	3.04815	7.46388e-08	up	AT5G39670	Calcium-binding EF-hand family protein
Ghir_A05G038420	1.37949	3.75071	1.51602	0.0350029	up	AT3G02110	serine carboxypeptidase-like 25
Ghir_A05G038470	1.94496	0.579964	-1.67176	1.31806e-06	down	AT1G74160	unknown protein; BEST Arabidopsis thaliana protein match is: unknown protein (TAIR:AT1G18620.1); Has 3407 Blast hits to 2217 proteins in 314 species: Archae - 0; Bacteria - 264; Metazoa - 1296; Fungi - 318; Plants - 346; Viruses - 34; Other Eukaryotes - 1149 (source: NCBI BLink).
Ghir_A05G038860	0.0655937	1.50306	4.53654	0.0195528	up	AT5G08630	DDT domain-containing protein
Ghir_A05G039130	20.2171	9.12942	-1.07267	0.000917018	down	AT2G42910	Phosphoribosyltransferase family protein
Ghir_A05G039480	0.465211	2.38073	2.44601	0.00558094	up	AT5G08790	NAC (No Apical Meristem) domain transcriptional regulator superfamily protein
Ghir_A05G039680	0.071929	3.05848	5.44886	1.89704e-18	up	AT4G33440	Pectin lyase-like superfamily protein
Ghir_A05G039920	0.497847	0.155034	-1.5835	0.0123345	down	AT5G60900	receptor-like protein kinase 1
Ghir_A05G040320	0.302475	2.94166	3.36277	9.68431e-13	up	AT1G65295	unknown protein; LOCATED IN: endomembrane system; EXPRESSED IN: 22 plant structures; EXPRESSED DURING: 13 growth stages; BEST Arabidopsis thaliana protein match is: unknown protein (TAIR:AT5G01015.1); Has 90 Blast hits to 90 proteins in 15 species: Archae - 0; Bacteria - 0; Metazoa - 0; Fungi - 0; Plants - 90; Viruses - 0; Other Eukaryotes - 0 (source: NCBI BLink).
Ghir_A05G040550	0.024268	0.659583	4.71419	0.0383118	up	AT5G08640	flavonol synthase 1
Ghir_A05G041150	0	0.371908	39.6262	1.67246e-15	up	AT5G09860	nuclear matrix protein-related
Ghir_A05G041230	24.7069	6.86919	-1.77164	0.00103391	down	AT5G07030	Eukaryotic aspartyl protease family protein
Ghir_A05G041380	0.0309883	0.55513	4.14644	0.000675206	up	AT2G31945	unknown protein; FUNCTIONS IN: molecular_function unknown; INVOLVED IN: biological_process unknown; LOCATED IN: endomembrane system; EXPRESSED IN: 8 plant structures; EXPRESSED DURING: 4 anthesis, petal differentiation and expansion stage; BEST Arabidopsis thaliana protein match is: unknown protein (TAIR:AT1G05575.1); Has 61 Blast hits to 61 proteins in 10 species: Archae - 0; Bacteria - 0; Metaz…
Ghir_A05G041510	0.188983	2.30033	3.70746	1.2509e-05	up	AT3G51580	unknown protein; FUNCTIONS IN: molecular_function unknown; INVOLVED IN: biological_process unknown; LOCATED IN: endomembrane system; EXPRESSED IN: 25 plant structures; EXPRESSED DURING: 15 growth stages; Has 1768 Blast hits to 1607 proteins in 294 species: Archae - 2; Bacteria - 552; Metazoa - 381; Fungi - 236; Plants - 306; Viruses - 38; Other Eukaryotes - 253 (source: NCBI BLink).
Ghir_A05G041590	1.31501	4.25111	1.76386	0.0126326	up	AT2G40610	expansin A8
Ghir_A05G042720	0.592339	1.76277	1.65382	0.0293457	up	AT3G49220	Plant invertase/pectin methylesterase inhibitor superfamily
Ghir_A05G042830	0.00322	0.044665	4.05166	0.0233805	up
Ghir_A05G043200	0.0208683	0.447128	4.25587	0.0382944	up
Ghir_A05G043220	0.871178	22.7648	4.74638	0.0173399	up	AT1G20330	sterol methyltransferase 2
Ghir_A06G000190	0.0468947	3.67833	6.31381	2.85165e-10	up	AT1G75900	GDSL-like Lipase/Acylhydrolase superfamily protein
Ghir_A06G000230	0.136141	0.514733	1.99355	2.25705e-07	up	AT1G27940	P-glycoprotein 13
Ghir_A06G000460	0.370689	1.35872	1.9482	0.00138232	up	AT1G19940	glycosyl hydrolase 9B5
Ghir_A06G000490	7.96797	20.8431	1.47475	0.0486068	up	AT1G75590	SAUR-like auxin-responsive protein family
Ghir_A06G000630	1.18874	0.389053	-1.5314	0.00397978	down	AT2G16430	purple acid phosphatase 10
Ghir_A06G000990	1.74768	5.79876	1.84219	0.00803583	up	AT4G36660	Protein of unknown function (DUF1195)
Ghir_A06G001570	0.083141	1.08189	3.76826	4.00282e-06	up	AT2G26560	phospholipase A 2A
Ghir_A06G001640	1.57392	0.182483	-3.03585	8.40588e-17	down	AT5G42750	BRI1 kinase inhibitor 1
Ghir_A06G002060	79.1095	24.8274	-1.60242	0.0323391	down	AT3G16150	N-terminal nucleophile aminohydrolases (Ntn hydrolases) superfamily protein
Ghir_A06G002110	21.2699	65.4119	1.71242	5.10776e-05	up	AT4G37260	myb domain protein 73
Ghir_A06G002180	0.277659	1.39405	2.37853	0.0327699	up	AT2G39540	Gibberellin-regulated family protein
Ghir_A06G002270	0.0422887	5.45763	7.09291	0.000170904	up	AT4G37540	LOB domain-containing protein 39
Ghir_A06G002330	0.068124	0.576364	3.11063	0.0486588	up	AT3G03990	alpha/beta-Hydrolases superfamily protein
Ghir_A06G002340	1.78293	3.44109	1.0433	0.0279592	up	AT3G01400	ARM repeat superfamily protein
Ghir_A06G002410	0.503243	2.90305	2.59473	0.0289299	up	AT3G49780	phytosulfokine 4 precursor
Ghir_A06G002420	0.0764173	1.98493	4.74303	0.00914582	up	AT4G10810	unknown protein; FUNCTIONS IN: molecular_function unknown; INVOLVED IN: biological_process unknown; LOCATED IN: chloroplast; EXPRESSED IN: 23 plant structures; EXPRESSED DURING: 15 growth stages; BEST Arabidopsis thaliana protein match is: unknown protein (TAIR:AT4G24026.1); Has 1807 Blast hits to 1807 proteins in 277 species: Archae - 0; Bacteria - 0; Metazoa - 736; Fungi - 347; Plants - 385; Vi…
Ghir_A06G002510	0.0216033	2.52068	6.94571	2.22566e-15	up	AT2G22840	growth-regulating factor 1
Ghir_A06G002750	0.0155153	0.355273	4.61969	4.35994e-05	up	AT1G09970	Leucine-rich receptor-like protein kinase family protein
Ghir_A06G003200	0.557625	0.128456	-2.03105	0.0474489	down	AT5G49700	Predicted AT-hook DNA-binding family protein
Ghir_A06G003300	1.08069	6.31021	2.61905	3.29232e-23	up	AT1G28390	Protein kinase superfamily protein
Ghir_A06G003400	0.409983	1.89894	2.29293	0.0105656	up	AT4G40080	ENTH/ANTH/VHS superfamily protein
Ghir_A06G003480	0.0493257	2.53105	5.76053	2.88275e-07	up	AT1G72240	unknown protein; BEST Arabidopsis thaliana protein match is: unknown protein (TAIR:AT1G22470.1); Has 65 Blast hits to 63 proteins in 13 species: Archae - 0; Bacteria - 0; Metazoa - 1; Fungi - 0; Plants - 64; Viruses - 0; Other Eukaryotes - 0 (source: NCBI BLink).
Ghir_A06G003650	6.40565	12.7684	1.0702	2.16025e-05	up	AT1G22330	RNA-binding (RRM/RBD/RNP motifs) family protein
Ghir_A06G003890	2.92763	7.07681	1.37451	0.00915854	up	AT1G78070	Transducin/WD40 repeat-like superfamily protein
Ghir_A06G004130	0	0.099338	6.63602	7.44434e-05	up
Ghir_A06G004250	0.136424	0.71383	2.45078	6.48642e-07	up	AT1G36940	unknown protein; Has 21 Blast hits to 21 proteins in 8 species: Archae - 0; Bacteria - 0; Metazoa - 0; Fungi - 0; Plants - 21; Viruses - 0; Other Eukaryotes - 0 (source: NCBI BLink).
Ghir_A06G004490	3.7041	67.3762	4.25867	6.18798e-20	up	AT4G08300	nodulin MtN21 /EamA-like transporter family protein
Ghir_A06G004750	2.92657	11.3617	2.03763	1.34726e-05	up	AT3G57040	response regulator 9
Ghir_A06G004760	5.62536	2.43337	-1.1314	0.0371993	down	AT1G77490	thylakoidal ascorbate peroxidase
Ghir_A06G004900	17.4148	3.96156	-2.08754	0.0194796	down	AT4G32551	LisH dimerisation motif;WD40/YVTN repeat-like-containing domain
Ghir_A06G005140	0	0.375153	8.3612	7.75867e-05	up
Ghir_A06G006280	0.146127	1.15634	3.09939	0.00138232	up	AT5G19950	Domain of unknown function (DUF1767)
Ghir_A06G006690	0.073644	0.254133	1.84424	0.0313944	up	AT3G24620	RHO guanyl-nucleotide exchange factor 8
Ghir_A06G007750	15.2155	141.537	3.30837	0.000472548	up	AT4G29780	unknown protein; BEST Arabidopsis thaliana protein match is: unknown protein (TAIR:AT5G12010.1); Has 945 Blast hits to 944 proteins in 87 species: Archae - 0; Bacteria - 0; Metazoa - 519; Fungi - 43; Plants - 365; Viruses - 0; Other Eukaryotes - 18 (source: NCBI BLink).
Ghir_A06G008510	3.22759	7.32362	1.25731	0.00273162	up	AT4G33180	alpha/beta-Hydrolases superfamily protein
Ghir_A06G009290	7.50446	16.0674	1.17982	0.0433364	up	AT5G11760	unknown protein; CONTAINS InterPro DOMAIN/s: Protein of unknown function DUF1764, eukaryotic (InterPro:IPR013885); Has 1807 Blast hits to 1807 proteins in 277 species: Archae - 0; Bacteria - 0; Metazoa - 736; Fungi - 347; Plants - 385; Viruses - 0; Other Eukaryotes - 339 (source: NCBI BLink).
Ghir_A06G009530	0.591736	0.005255	-6.68356	0.0403977	down	AT3G53920	RNApolymerase sigma-subunit C
Ghir_A06G010490	3.93057	8.25814	1.13882	0.0250754	up	AT5G25390	Integrase-type DNA-binding superfamily protein
Ghir_A06G010870	1.88708	16.7061	3.21869	3.86596e-08	up	AT1G80840	WRKY DNA-binding protein 40
Ghir_A06G010880	0.664134	2.93107	2.23593	0.000113688	up	AT5G25110	CBL-interacting protein kinase 25
Ghir_A06G011290	0.243554	0.001091	-7.13868	0.0291832	down
Ghir_A06G011540	1.59313	0.021203	-6.10698	1.49565e-06	down	AT5G49810	methionine S-methyltransferase
Ghir_A06G012700	10.4943	22.7526	1.19087	0.00279371	up	AT2G24550	unknown protein; BEST Arabidopsis thaliana protein match is: unknown protein (TAIR:AT4G31510.1); Has 219 Blast hits to 219 proteins in 33 species: Archae - 0; Bacteria - 0; Metazoa - 16; Fungi - 2; Plants - 184; Viruses - 0; Other Eukaryotes - 17 (source: NCBI BLink).
Ghir_A06G012840	1.45558	4.04953	1.56345	0.0157559	up	AT4G20880	ethylene-responsive nuclear protein / ethylene-regulated nuclear protein (ERT2)
Ghir_A06G013010	1.73314	0.538762	-1.60719	0.00011159	down	AT1G11340	S-locus lectin protein kinase family protein
Ghir_A06G013260	4.13394	0	-27.9236	3.01713e-05	down	AT1G28260	Telomerase activating protein Est1
Ghir_A06G013690	0.238792	0.728597	1.69853	6.55292e-08	up	AT1G07180	alternative NAD(P)H dehydrogenase 1
Ghir_A06G013710	6.84166	21.9955	1.76793	0.000424468	up	AT4G21620	glycine-rich protein
Ghir_A06G014250	0.092145	0.405999	2.21232	0.00369201	up	AT2G42760	unknown protein; CONTAINS InterPro DOMAIN/s: Protein of unknown function DUF1685 (InterPro:IPR012881); Has 170 Blast hits to 164 proteins in 34 species: Archae - 0; Bacteria - 1; Metazoa - 26; Fungi - 10; Plants - 107; Viruses - 0; Other Eukaryotes - 26 (source: NCBI BLink).
Ghir_A06G015030	0.233988	4.94597	4.47264	3.70664e-08	up
Ghir_A06G015620	0.0345573	2.54866	6.2401	0.019296	up	AT2G02560	cullin-associated and neddylation dissociated
Ghir_A06G015770	0.038128	0.282375	2.85965	0.0411806	up	AT1G11545	xyloglucan endotransglucosylase/hydrolase 8
Ghir_A06G016190	0	0.205416	8.00078	0.0017705	up	AT1G62280	SLAC1 homologue 1
Ghir_A06G016460	0.0246437	1.98998	6.36888	1.17876e-19	up	AT3G25070	RPM1 interacting protein 4
Ghir_A06G016530	0.0113113	0.187506	4.00791	0.00438618	up
Ghir_A06G016590	7.06931	24.8005	1.87845	0.000136607	up
Ghir_A06G016750	0.0608883	5.7636	6.56599	0.000165085	up	AT2G35760	Uncharacterised protein family (UPF0497)
Ghir_A06G016970	3.01013	0.549836	-2.38665	1.73823e-07	down	AT1G02205	Fatty acid hydroxylase superfamily
Ghir_A06G016980	0.0892413	0.36822	2.10857	0.0221994	up	AT1G02205	Fatty acid hydroxylase superfamily
Ghir_A06G017070	0.299611	0.896956	1.6496	0.000497807	up	AT5G13460	IQ-domain 11
Ghir_A06G017260	8.22371	39.3375	2.35885	4.54885e-05	up	AT3G56110	prenylated RAB acceptor 1.B1
Ghir_A06G017440	1.03694	2.61638	1.43981	0.0244663	up	AT4G18640	Leucine-rich repeat protein kinase family protein
Ghir_A06G017460	6.58291	0.900107	-2.80034	0.000997367	down	AT3G11110	RING/U-box superfamily protein
Ghir_A06G017850	14.6301	3.17409	-2.14281	0.0342437	down	AT2G39730	rubisco activase
Ghir_A06G018030	0.210476	1.51164	2.90719	0.0346077	up	AT2G39510	nodulin MtN21 /EamA-like transporter family protein
Ghir_A06G018080	0	0.034389	40.8447	4.21165e-63	up	AT2G39420	alpha/beta-Hydrolases superfamily protein
Ghir_A06G018090	0.0191833	1.98196	6.69987	4.86127e-14	up	AT5G04530	3-ketoacyl-CoA synthase 19
Ghir_A06G018870	0.463291	0.00197033	-7.78956	6.95656e-11	down	AT5G06100	myb domain protein 33
Ghir_A06G018920	0	0.847779	10.7793	1.6383e-13	up
Ghir_A06G019220	0	0.483594	24.4334	2.11681e-08	up	AT5G57655	xylose isomerase family protein
Ghir_A06G019500	3.40497	0.613357	-2.37456	0.0306829	down	AT5G36880	acetyl-CoA synthetase
Ghir_A06G019520	0.011845	2.24724	7.4518	0.000120771	up	AT3G17510	CBL-interacting protein kinase 1
Ghir_A06G019720	0.529224	5.70207	3.53178	4.27552e-06	up	AT1G80840	WRKY DNA-binding protein 40
Ghir_A06G020120	0.005492	0.266312	5.681	0.0226051	up	AT1G15460	HCO3- transporter family
Ghir_A06G020610	0.515401	0	-9.5912	0.00985622	down	AT5G48930	hydroxycinnamoyl-CoA shikimate/quinate hydroxycinnamoyl transferase
Ghir_A06G021040	0.327421	1.97924	2.67759	1.98046e-09	up	AT1G30280	Chaperone DnaJ-domain superfamily protein
Ghir_A06G021180	0.127056	0.928483	2.88691	0.00550703	up	AT1G06475	unknown protein; Has 35333 Blast hits to 34131 proteins in 2444 species: Archae - 798; Bacteria - 22429; Metazoa - 974; Fungi - 991; Plants - 531; Viruses - 0; Other Eukaryotes - 9610 (source: NCBI BLink).
Ghir_A06G021290	0.0374043	0.28756	3.07692	0.00183988	up	AT1G29670	GDSL-like Lipase/Acylhydrolase superfamily protein
Ghir_A06G021830	1.66051	0.068531	-4.48156	0.0125744	down	AT1G61150	LisH and RanBPM domains containing protein
Ghir_A06G022340	4.24813	53.4685	3.75645	1.03754e-12	up	AT4G17230	SCARECROW-like 13
Ghir_A06G022780	0.112147	0.92663	3.14685	0.00992679	up	AT1G75450	cytokinin oxidase 5
Ghir_A07G000130	0.00719467	0.0894063	3.28929	0.00368976	up	AT2G18980	Peroxidase superfamily protein
Ghir_A07G000180	9.33956	21.0014	1.25991	0.00409043	up	AT4G31550	WRKY DNA-binding protein 11
Ghir_A07G000230	1.72246	3.43092	1.08293	0.0202856	up	AT2G26650	K+ transporter 1
Ghir_A07G000300	0.0421813	1.97811	5.67387	0.00136222	up
Ghir_A07G000620	3.82262	7.55527	1.0837	0.0197821	up	AT3G24530	AAA-type ATPase family protein / ankyrin repeat family protein
Ghir_A07G000660	0.141764	0	-23.7971	1.03754e-12	down	AT4G32350	Regulator of Vps4 activity in the MVB pathway protein
Ghir_A07G000670	0.308688	0	-7.47028	0.0300724	down
Ghir_A07G000690	0.200428	4.95963	4.63238	1.27889e-12	up	AT3G13227	serine-rich protein-related
Ghir_A07G000980	0.10123	0.775195	3.04224	5.29916e-17	up	AT4G29310	Protein of unknown function (DUF1005)
Ghir_A07G001230	11.7436	27.3911	1.30873	0.0419468	up	AT5G56980	unknown protein; FUNCTIONS IN: molecular_function unknown; INVOLVED IN: biological_process unknown; LOCATED IN: endomembrane system; EXPRESSED IN: 18 plant structures; EXPRESSED DURING: 12 growth stages; BEST Arabidopsis thaliana protein match is: unknown protein (TAIR:AT4G26130.1); Has 30201 Blast hits to 17322 proteins in 780 species: Archae - 12; Bacteria - 1396; Metazoa - 17338; Fungi - 3422;…
Ghir_A07G001340	4.10107	11.1288	1.5072	0.0181144	up	AT5G11970	Protein of unknown function (DUF3511)
Ghir_A07G001680	6.24293	0.0221987	-7.98045	1.29719e-06	down	AT3G14100	RNA-binding (RRM/RBD/RNP motifs) family protein
Ghir_A07G001690	1.09389	29.6332	4.84668	5.02178e-05	up	AT1G19210	Integrase-type DNA-binding superfamily protein
Ghir_A07G001700	30.4275	72.0279	1.31929	0.0455771	up	AT5G20720	chaperonin 20
Ghir_A07G001950	2.90319	9.69003	1.83306	0.0111301	up	AT1G72510	Protein of unknown function (DUF1677)
Ghir_A07G002160	1.60917	75.4171	5.59644	0.000289643	up	AT5G12020	17.6 kDa class II heat shock protein
Ghir_A07G002300	3.86368	1.3851	-1.40726	0.00142506	down	AT2G26110	Protein of unknown function (DUF761)
Ghir_A07G002650	0.475155	0.011932	-5.19689	0.0134302	down	AT2G25790	Leucine-rich receptor-like protein kinase family protein
Ghir_A07G002840	16.7657	32.6707	1.03718	0.0183409	up	AT3G16080	Zinc-binding ribosomal protein family protein
Ghir_A07G003190	1.92005	11.1312	2.60735	8.41969e-07	up	AT4G30610	alpha/beta-Hydrolases superfamily protein
Ghir_A07G003290	0	0.177216	7.28739	0.0417344	up	AT4G32340	Tetratricopeptide repeat (TPR)-like superfamily protein
Ghir_A07G003300	6.81816	0.109858	-5.80547	0.0316588	down	AT4G32330	TPX2 (targeting protein for Xklp2) protein family
Ghir_A07G003430	12.2757	4.35984	-1.41387	1.49706e-05	down	AT2G25310	Protein of unknown function (DUF2012)
Ghir_A07G003470	2.61279	13.6768	2.46691	0.00315732	up	AT5G11070	unknown protein; Has 1807 Blast hits to 1807 proteins in 277 species: Archae - 0; Bacteria - 0; Metazoa - 736; Fungi - 347; Plants - 385; Viruses - 0; Other Eukaryotes - 339 (source: NCBI BLink).
Ghir_A07G003550	0.764143	0.114232	-2.62346	0.0376833	down	AT5G25190	Integrase-type DNA-binding superfamily protein
Ghir_A07G003600	7.13852	0	-25.8156	3.65906e-05	down	AT2G32070	Polynucleotidyl transferase, ribonuclease H-like superfamily protein
Ghir_A07G003710	5.93567	1.72514	-1.71166	3.13363e-06	down	AT4G31820	Phototropic-responsive NPH3 family protein
Ghir_A07G003860	0.00751133	0.271593	5.05693	0.000331496	up	AT4G31730	glutamine dumper 1
Ghir_A07G004050	0.176498	0.0318827	-2.41099	0.0449347	down	AT2G26690	Major facilitator superfamily protein
Ghir_A07G004250	0.158085	8.53764	5.79498	1.31028e-08	up	AT4G32280	indole-3-acetic acid inducible 29
Ghir_A07G004280	3.62229	8.54443	1.33006	0.000121077	up	AT2G43290	Calcium-binding EF-hand family protein
Ghir_A07G004590	1.27876	0.382451	-1.66997	0.043492	down	AT1G27500	Tetratricopeptide repeat (TPR)-like superfamily protein
Ghir_A07G005460	0	0.0289517	5.16975	0.00926838	up	AT5G50760	SAUR-like auxin-responsive protein family
Ghir_A07G006030	3.26912	0.132011	-4.45877	0.0385733	down	AT5G63190	MA3 domain-containing protein
Ghir_A07G006060	2.14503	5.20655	1.35514	0.000263634	up	AT5G63160	BTB and TAZ domain protein 1
Ghir_A07G007960	5.33398	21.2947	2.07041	9.84398e-08	up	AT5G14700	NAD(P)-binding Rossmann-fold superfamily protein
Ghir_A07G008040	0.827882	0.331412	-1.2482	0.0300724	down	AT3G03210	unknown protein; FUNCTIONS IN: molecular_function unknown; INVOLVED IN: biological_process unknown; LOCATED IN: endomembrane system; EXPRESSED IN: 24 plant structures; EXPRESSED DURING: 15 growth stages; Has 59 Blast hits to 59 proteins in 17 species: Archae - 0; Bacteria - 0; Metazoa - 0; Fungi - 0; Plants - 56; Viruses - 0; Other Eukaryotes - 3 (source: NCBI BLink).
Ghir_A07G008230	0	3.98121	10.4951	6.20834e-07	up	AT2G15050	lipid transfer protein
Ghir_A07G008250	0	0.840967	9.97717	0.0062654	up	AT2G01300	unknown protein; BEST Arabidopsis thaliana protein match is: unknown protein (TAIR:AT1G15010.1); Has 73 Blast hits to 73 proteins in 12 species: Archae - 0; Bacteria - 0; Metazoa - 0; Fungi - 0; Plants - 73; Viruses - 0; Other Eukaryotes - 0 (source: NCBI BLink).
Ghir_A07G008390	0	1.18171	10.354	9.62773e-07	up	AT5G37800	RHD SIX-LIKE 1
Ghir_A07G008430	1.58787	27.9575	4.23925	3.61682e-09	up	AT1G66400	calmodulin like 23
Ghir_A07G008880	0.339554	1.02087	1.69026	0.000529266	up	AT3G59080	Eukaryotic aspartyl protease family protein
Ghir_A07G008950	0.138426	7.86797	5.88403	1.30189e-05	up	AT2G32190	unknown protein; BEST Arabidopsis thaliana protein match is: unknown protein (TAIR:AT2G32210.1); Has 218 Blast hits to 218 proteins in 24 species: Archae - 0; Bacteria - 0; Metazoa - 0; Fungi - 16; Plants - 202; Viruses - 0; Other Eukaryotes - 0 (source: NCBI BLink).
Ghir_A07G008960	29.5097	69.9905	1.31948	0.00966405	up	AT4G15000	Ribosomal L27e protein family
Ghir_A07G009090	1.11841	0.29908	-1.80269	0.0164389	down	AT1G05090	dentin sialophosphoprotein-related
Ghir_A07G010680	1.81026	4.77515	1.467	0.035621	up	AT2G39700	expansin A4
Ghir_A07G010750	0.582011	11.2129	4.28743	0.0330523	up	AT3G46620	zinc finger (C3HC4-type RING finger) family protein
Ghir_A07G010980	0.0675463	1.26733	4.24508	0.0455053	up	AT1G07400	HSP20-like chaperones superfamily protein
Ghir_A07G011040	0.48312	0.083875	-2.40722	0.00315126	down	AT5G58940	calmodulin-binding receptor-like cytoplasmic kinase 1
Ghir_A07G011680	0.711127	5.9612	3.15744	3.95797e-08	up	AT2G27580	A20/AN1-like zinc finger family protein
Ghir_A07G011770	0.0309123	0	-6.00626	0.0159749	down	AT2G27500	Glycosyl hydrolase superfamily protein
Ghir_A07G011830	0.236338	1.33202	2.58455	0.00154724	up	AT3G44350	NAC domain containing protein 61
Ghir_A07G011940	0.0544343	0.786467	3.87253	1.83664e-05	up	AT5G04820	ovate family protein 13
Ghir_A07G012050	0	1.68634	11.6972	4.5775e-07	up	AT1G08440	Aluminium activated malate transporter family protein
Ghir_A07G012630	19.101	149.081	3.07832	0.0184745	up	AT5G12250	beta-6 tubulin
Ghir_A07G012760	1.2094	0.300858	-1.91677	0.00225949	down	AT5G49700	Predicted AT-hook DNA-binding family protein
Ghir_A07G013200	2.498	0.764135	-1.60617	0.0422123	down	AT2G40400	Protein of unknown function (DUF399 and DUF3411)
Ghir_A07G013520	0.0462233	1.01826	4.48206	0.00189476	up	AT5G38700	unknown protein; FUNCTIONS IN: molecular_function unknown; INVOLVED IN: biological_process unknown; LOCATED IN: mitochondrion; EXPRESSED IN: 10 plant structures; EXPRESSED DURING: LP.04 four leaves visible, LP.10 ten leaves visible, petal differentiation and expansion stage, LP.08 eight leaves visible, LP.12 twelve leaves visible; BEST Arabidopsis thaliana protein match is: unknown protein (TAIR:…
Ghir_A07G013620	0.339072	5.74979	4.176	0.000607116	up	AT3G03280	unknown protein; FUNCTIONS IN: molecular_function unknown; INVOLVED IN: N-terminal protein myristoylation; LOCATED IN: cellular_component unknown; BEST Arabidopsis thaliana protein match is: unknown protein (TAIR:AT5G17350.1); Has 137 Blast hits to 137 proteins in 11 species: Archae - 0; Bacteria - 0; Metazoa - 0; Fungi - 0; Plants - 137; Viruses - 0; Other Eukaryotes - 0 (source: NCBI BLink).
Ghir_A07G013910	0.534174	1.76924	1.79079	0.00952379	up	ATCG01050	NADH-Ubiquinone/plastoquinone (complex I) protein
Ghir_A07G014700	0.0433673	2.13484	5.63858	0.000336103	up	AT5G42800	dihydroflavonol 4-reductase
Ghir_A07G015530	0.160536	0.0240373	-2.56919	0.0254759	down	AT2G45430	AT-hook motif nuclear-localized protein 22
Ghir_A07G015770	3.39479	14.8044	2.23704	0.00507742	up	AT1G02065	squamosa promoter binding protein-like 8
Ghir_A07G015790	1.43119	5.1467	1.9192	0.017644	up	AT3G07390	auxin-responsive family protein
Ghir_A07G015870	0.043417	0.927428	4.39437	0.0259545	up	AT2G31180	myb domain protein 14
Ghir_A07G016470	0.514495	68.1078	7.06116	3.15912e-06	up
Ghir_A07G016650	0.927546	0.37848	-1.21558	0.0088829	down	AT1G04760	vesicle-associated membrane protein 726
Ghir_A07G016950	21.9075	9.56251	-1.13019	0.016626	down	AT3G07320	O-Glycosyl hydrolases family 17 protein
Ghir_A07G017520	0.179615	2.88226	4.04078	4.19155e-07	up	ATCG00500	acetyl-CoA carboxylase carboxyl transferase subunit beta
Ghir_A07G017530	0.244567	3.56796	3.87404	5.6824e-11	up	ATCG00500	acetyl-CoA carboxylase carboxyl transferase subunit beta
Ghir_A07G017540	0.508841	3.83728	2.95652	2.59031e-07	up	ATCG00520	unfolded protein binding
Ghir_A07G017680	5.79288	0.952674	-2.5056	0.0348328	down	AT3G21670	Major facilitator superfamily protein
Ghir_A07G017940	1.08572	0.144579	-2.79683	0.000881662	down	AT2G04842	threonyl-tRNA synthetase, putative / threonine--tRNA ligase, putative
Ghir_A07G018660	0.214453	2.94658	3.82305	0.00571587	up
Ghir_A07G018700	11.8474	1.73712	-2.72892	0.0228504	down	AT5G38430	Ribulose bisphosphate carboxylase (small chain) family protein
Ghir_A07G019020	2.62351	9.06199	1.86912	0.0160195	up	AT2G24762	glutamine dumper 4
Ghir_A07G019350	0.0854043	0.29228	1.89151	0.042637	up
Ghir_A07G019580	1.08209	3.0882	1.59305	0.00821088	up	AT1G14130	2-oxoglutarate (2OG) and Fe(II)-dependent oxygenase superfamily protein
Ghir_A07G019780	0.0507757	0.20277	2.07485	0.000384301	up	AT1G62300	WRKY family transcription factor
Ghir_A07G020040	0.0159583	0.765594	5.55113	0.00766995	up
Ghir_A07G020260	0.966348	0.0788433	-3.51816	0.019685	down
Ghir_A07G020420	0.153459	1.24108	3.07144	0.01234	up	AT5G35732	unknown protein; BEST Arabidopsis thaliana protein match is: unknown protein (TAIR:AT2G04795.1); Has 35333 Blast hits to 34131 proteins in 2444 species: Archae - 798; Bacteria - 22429; Metazoa - 974; Fungi - 991; Plants - 531; Viruses - 0; Other Eukaryotes - 9610 (source: NCBI BLink).
Ghir_A07G020430	1.25957	0.0588613	-4.1998	0.00316888	down
Ghir_A07G020570	4.00766	0.794356	-2.26486	1.7301e-09	down	AT5G48170	F-box family protein
Ghir_A07G020610	0.0680543	0.456244	2.75982	0.000509471	up	AT3G13130	unknown protein; FUNCTIONS IN: molecular_function unknown; INVOLVED IN: biological_process unknown; LOCATED IN: endomembrane system; EXPRESSED IN: male gametophyte; Has 140 Blast hits to 132 proteins in 41 species: Archae - 2; Bacteria - 4; Metazoa - 29; Fungi - 20; Plants - 51; Viruses - 0; Other Eukaryotes - 34 (source: NCBI BLink).
Ghir_A07G021270	0.764384	8.04293	3.47088	5.53808e-14	up	AT1G05810	RAB GTPase homolog A5E
Ghir_A07G021320	0.592539	2.17727	1.96899	8.212e-09	up	AT4G13000	AGC (cAMP-dependent, cGMP-dependent and protein kinase C) kinase family protein
Ghir_A07G021390	17.5246	42.9769	1.38186	1.56734e-05	up	AT4G13010	Oxidoreductase, zinc-binding dehydrogenase family protein
Ghir_A07G021930	0.158376	2.35812	3.9879	0.0197821	up	AT3G04300	RmlC-like cupins superfamily protein
Ghir_A07G022200	0	0.742321	9.10016	5.9443e-06	up	AT3G28917	mini zinc finger 2
Ghir_A07G022510	22.9985	9.52506	-1.20886	0.00994373	down	AT1G47720	Primosome PriB/single-strand DNA-binding
Ghir_A07G022570	13.2482	0.0608023	-7.5954	3.65437e-07	down	AT2G30570	photosystem II reaction center W
Ghir_A07G023430	0.0880183	0.666913	2.98798	0.000147537	up	AT3G28210	zinc finger (AN1-like) family protein
Ghir_A07G023590	2.65971	7.23952	1.53448	0.0444186	up	AT3G04090	small and basic intrinsic protein 1A
Ghir_A07G023810	0	1.35062	11.8532	3.38378e-05	up	AT5G40350	myb domain protein 24
Ghir_A07G023980	17.9899	0.0646117	-7.91693	0.0466747	down	AT5G04800	Ribosomal S17 family protein
Ghir_A07G024060	2.40518	7.23155	1.6639	0.00507576	up	AT5G40500	unknown protein; FUNCTIONS IN: molecular_function unknown; INVOLVED IN: biological_process unknown; LOCATED IN: cellular_component unknown; EXPRESSED IN: 23 plant structures; EXPRESSED DURING: 13 growth stages; Has 49 Blast hits to 49 proteins in 22 species: Archae - 0; Bacteria - 7; Metazoa - 0; Fungi - 0; Plants - 42; Viruses - 0; Other Eukaryotes - 0 (source: NCBI BLink).
Ghir_A07G024350	11.5431	4.75205	-1.20201	0.00254869	down	AT1G13440	glyceraldehyde-3-phosphate dehydrogenase C2
Ghir_A07G024800	0.0640613	3.45341	5.82623	0.0289714	up	AT5G13200	GRAM domain family protein
Ghir_A07G025130	0.0853893	1.86495	4.44438	0.0152419	up
Ghir_A07G025180	9.24319	18.8364	1.1145	0.0191457	up	AT5G59730	exocyst subunit exo70 family protein H7
Ghir_A08G000280	0.293068	0.0179593	-3.89186	0.0272426	down	AT5G02640	unknown protein; BEST Arabidopsis thaliana protein match is: unknown protein (TAIR:AT3G46300.1); Has 37 Blast hits to 37 proteins in 10 species: Archae - 0; Bacteria - 0; Metazoa - 0; Fungi - 0; Plants - 37; Viruses - 0; Other Eukaryotes - 0 (source: NCBI BLink).
Ghir_A08G000330	0.211158	0.816819	1.98291	0.0222076	up	AT1G33270	Acyl transferase/acyl hydrolase/lysophospholipase superfamily protein
Ghir_A08G000600	0.199132	0.904472	2.23157	0.00635334	up
Ghir_A08G000790	0	0.702085	24.8199	0.000345011	up	AT5G22780	Adaptor protein complex AP-2, alpha subunit
Ghir_A08G000800	2.41373	6.88251	1.60998	0.00274616	up	AT5G22740	cellulose synthase-like A02
Ghir_A08G000890	10.308	24.2697	1.31522	0.0369508	up	AT3G44590	60S acidic ribosomal protein family
Ghir_A08G000900	0.0185637	0.465799	4.58809	0.0335883	up	AT2G27690	cytochrome P450, family 94, subfamily C, polypeptide 1
Ghir_A08G002200	13.5301	27.4459	1.09891	0.0378222	up	AT5G58110	chaperone binding;ATPase activators
Ghir_A08G002220	3.20758	0.167314	-4.14655	0.00384858	down	AT5G58100	unknown protein; INVOLVED IN: pollen exine formation; EXPRESSED IN: 19 plant structures; EXPRESSED DURING: 8 growth stages; BEST Arabidopsis thaliana protein match is: unknown protein (TAIR:AT3G28720.1); Has 35333 Blast hits to 34131 proteins in 2444 species: Archae - 798; Bacteria - 22429; Metazoa - 974; Fungi - 991; Plants - 531; Viruses - 0; Other Eukaryotes - 9610 (source: NCBI BLink).
Ghir_A08G002810	0.0311493	0.875926	4.91985	8.10686e-09	up	AT4G25810	xyloglucan endotransglycosylase 6
Ghir_A08G003210	0.031649	0.314205	3.32944	0.0409454	up	AT3G60070	Major facilitator superfamily protein
Ghir_A08G003320	5.38683	10.8018	1.08612	0.00018344	up	AT3G12630	A20/AN1-like zinc finger family protein
Ghir_A08G003990	0.346758	0	-36.4046	4.55486e-11	down	AT3G02470	S-adenosylmethionine decarboxylase
Ghir_A08G004030	1.74346	5.30535	1.69502	0.0394994	up	AT1G13280	allene oxide cyclase 4
Ghir_A08G004590	0.696722	2.37635	1.85535	4.0687e-05	up	AT2G47520	Integrase-type DNA-binding superfamily protein
Ghir_A08G005760	7.73e-05	0	-16.3271	0.000107275	down	AT1G66510	AAR2 protein family
Ghir_A08G006000	0.0335443	0.210365	2.6784	0.00955384	up	AT5G13700	polyamine oxidase 1
Ghir_A08G006700	0.12682	0.940335	2.95364	0.0124977	up	AT2G30550	alpha/beta-Hydrolases superfamily protein
Ghir_A08G006730	0.201529	24.7601	7.0178	9.48539e-21	up	AT5G43700	AUX/IAA transcriptional regulator family protein
Ghir_A08G006790	0.366627	0	-25.4252	5.50175e-05	down	AT3G22970	Protein of unknown function (DUF506)
Ghir_A08G007020	2.66668	0.828714	-1.61388	0.035721	down	AT1G03090	methylcrotonyl-CoA carboxylase alpha chain, mitochondrial / 3-methylcrotonyl-CoA carboxylase 1 (MCCA)
Ghir_A08G008000	0.128069	6.48023	5.7222	0.00820867	up	AT5G27690	Heavy metal transport/detoxification superfamily protein
Ghir_A08G008010	1.16765	7.98782	2.82131	0.000795158	up
Ghir_A08G008110	2.8379	6.05797	1.17549	0.000182225	up	AT4G02425	unknown protein; FUNCTIONS IN: molecular_function unknown; INVOLVED IN: biological_process unknown; LOCATED IN: chloroplast; Has 29 Blast hits to 28 proteins in 15 species: Archae - 0; Bacteria - 0; Metazoa - 6; Fungi - 0; Plants - 23; Viruses - 0; Other Eukaryotes - 0 (source: NCBI BLink).
Ghir_A08G008210	0.0981837	0.980082	3.38829	0.0223498	up	AT4G02380	senescence-associated gene 21
Ghir_A08G008240	1.89918	0	-11.0838	0.00208709	down	AT1G02816	Protein of unknown function, DUF538
Ghir_A08G008470	5.47403	1.26343	-2.02807	0.0141686	down	AT1G55250	histone mono-ubiquitination 2
Ghir_A08G008490	2.68721	0.589978	-2.10378	0.000698762	down	AT3G13620	Amino acid permease family protein
Ghir_A08G008950	2.80708	0.0347617	-6.17334	0.0260713	down	AT5G57460	unknown protein; FUNCTIONS IN: molecular_function unknown; INVOLVED IN: biological_process unknown; LOCATED IN: plasma membrane, chloroplast; EXPRESSED IN: 23 plant structures; EXPRESSED DURING: 13 growth stages; Has 166 Blast hits to 166 proteins in 41 species: Archae - 0; Bacteria - 0; Metazoa - 112; Fungi - 4; Plants - 36; Viruses - 0; Other Eukaryotes - 14 (source: NCBI BLink).
Ghir_A08G009390	12.0068	3.62171	-1.66193	0.00398477	down	AT2G12550	ubiquitin-associated (UBA)/TS-N domain-containing protein
Ghir_A08G009480	0	0.0508657	5.97329	0.0226454	up	AT2G12646	PLATZ transcription factor family protein
Ghir_A08G009530	1.55511	3.56584	1.28489	0.0109526	up	AT5G23740	ribosomal protein S11-beta
Ghir_A08G009620	1.67777	0.0288047	-5.76784	0.04061	down	AT5G10790	ubiquitin-specific protease 22
Ghir_A08G009740	0.0138047	0.066743	2.15087	0.0475563	up	AT5G57830	Protein of unknown function, DUF593
Ghir_A08G009900	15.2735	67.094	2.24959	0.000361107	up	AT2G23810	tetraspanin8
Ghir_A08G010500	0.893608	2.62206	1.6199	0.00104634	up
Ghir_A08G010800	0.602025	2.60162	2.20238	0.00830089	up	AT2G46690	SAUR-like auxin-responsive protein family
Ghir_A08G011250	0.758602	2.90672	2.01178	0.0243447	up	AT2G16720	myb domain protein 7
Ghir_A08G011350	3.68248	17.4413	2.34023	2.06179e-10	up	AT5G42050	DCD (Development and Cell Death) domain protein
Ghir_A08G011460	4.78518	28.9235	2.68982	0.0164794	up	AT4G24110	unknown protein; Has 76 Blast hits to 76 proteins in 13 species: Archae - 0; Bacteria - 0; Metazoa - 1; Fungi - 0; Plants - 75; Viruses - 0; Other Eukaryotes - 0 (source: NCBI BLink).
Ghir_A08G011570	0	0.68514	25.5611	1.92941e-12	up	AT1G32920	unknown protein; FUNCTIONS IN: molecular_function unknown; INVOLVED IN: response to wounding; LOCATED IN: endomembrane system; EXPRESSED IN: 23 plant structures; EXPRESSED DURING: 13 growth stages; BEST Arabidopsis thaliana protein match is: unknown protein (TAIR:AT1G32928.1); Has 42 Blast hits to 42 proteins in 8 species: Archae - 0; Bacteria - 0; Metazoa - 0; Fungi - 0; Plants - 42; Viruses - 0…
Ghir_A08G011640	0.21651	0.834668	1.99251	0.00429645	up	AT2G18196	Heavy metal transport/detoxification superfamily protein
Ghir_A08G012050	0	0.126307	7.86615	0.044271	up	AT3G18440	aluminum-activated malate transporter 9
Ghir_A08G012270	0.268776	0.76056	1.58131	0.00282223	up	AT4G23500	Pectin lyase-like superfamily protein
Ghir_A08G012640	1.61365	9.03676	2.56745	2.41378e-07	up	AT3G16770	ethylene-responsive element binding protein
Ghir_A08G012870	0.264062	0.624975	1.32157	0.0458138	up	AT4G01950	glycerol-3-phosphate acyltransferase 3
Ghir_A08G013270	0.2594	0.580886	1.24096	0.0413548	up	AT4G07950	DNA-directed RNA polymerase, subunit M, archaeal
Ghir_A08G013370	4.74885	0.037238	-6.86891	0.000285919	down	AT3G61710	AUTOPHAGY 6
Ghir_A08G013400	2.25618	0	-26.4906	9.40519e-18	down	AT4G01050	thylakoid rhodanese-like
Ghir_A08G014080	1.32394	5.69885	2.20013	4.57787e-07	up	AT4G01250	WRKY family transcription factor
Ghir_A08G014520	0.303255	0.019966	-3.74643	0.00182125	down	AT3G60550	cyclin p3;2
Ghir_A08G014570	0.465874	0.105332	-2.06583	5.56989e-05	down	AT3G60520	unknown protein; BEST Arabidopsis thaliana protein match is: unknown protein (TAIR:AT1G02070.1); Has 107 Blast hits to 107 proteins in 14 species: Archae - 0; Bacteria - 0; Metazoa - 0; Fungi - 0; Plants - 107; Viruses - 0; Other Eukaryotes - 0 (source: NCBI BLink).
Ghir_A08G014900	35.8089	86.5491	1.34977	0.0462932	up	AT3G10950	Zinc-binding ribosomal protein family protein
Ghir_A08G015780	43.114	166.641	2.04581	0.00189336	up
Ghir_A08G015920	5.25958	0	-34.1107	9.17206e-08	down	AT4G19110	Protein kinase superfamily protein
Ghir_A08G016440	1.90953	9.41677	2.4034	5.25648e-07	up	AT4G17900	PLATZ transcription factor family protein
Ghir_A08G016610	0.249673	0	-31.8609	8.79856e-07	down	AT1G32560	Late embryogenesis abundant protein, group 1 protein
Ghir_A08G016640	0.0568403	0	-40.4818	2.25188e-19	down	AT4G17970	aluminum-activated, malate transporter 12
Ghir_A08G016700	0.0423337	0	-6.01661	0.00926838	down	AT2G32440	ent-kaurenoic acid hydroxylase 2
Ghir_A08G017050	0.777608	6.75739	3.21663	0.0123879	up	AT5G47090	unknown protein; CONTAINS InterPro DOMAIN/s: Protein of unknown function DUF2052, coiled-coil (InterPro:IPR018613); Has 30201 Blast hits to 17322 proteins in 780 species: Archae - 12; Bacteria - 1396; Metazoa - 17338; Fungi - 3422; Plants - 5037; Viruses - 0; Other Eukaryotes - 2996 (source: NCBI BLink).
Ghir_A08G017340	4.22265	28.4943	2.84746	0.00011159	up	AT5G02890	HXXXD-type acyl-transferase family protein
Ghir_A08G017450	0.582031	7.66503	3.7978	0.0138	up	AT5G47230	ethylene responsive element binding factor 5
Ghir_A08G018570	0.502827	0	-9.79595	0.0012704	down	AT4G11820	hydroxymethylglutaryl-CoA synthase / HMG-CoA synthase / 3-hydroxy-3-methylglutaryl coenzyme A synthase
Ghir_A08G019020	4.36444	11.5546	1.47892	0.00635221	up	AT4G11600	glutathione peroxidase 6
Ghir_A08G019390	6.78317	16.6052	1.38576	0.0307704	up	AT3G63060	Eid1-like 3
Ghir_A08G020340	0.437368	3.45865	3.02552	0.00420622	up	AT3G07090	PPPDE putative thiol peptidase family protein
Ghir_A08G020910	6.59798	38.3961	2.65504	0.000373146	up	AT5G60800	Heavy metal transport/detoxification superfamily protein
Ghir_A08G020940	0.301122	1.25283	2.1376	0.0369696	up	AT3G45010	serine carboxypeptidase-like 48
Ghir_A08G021000	0.812234	2.12959	1.47944	0.00213382	up	AT5G22930	Protein of unknown function (DUF1635)
Ghir_A08G021040	0.179675	1.94006	3.50878	1.58683e-05	up	AT1G07150	mitogen-activated protein kinase kinase kinase 13
Ghir_A08G021070	2.71469	5.88247	1.1918	7.79231e-08	up	AT2G30080	ZIP metal ion transporter family
Ghir_A08G021080	0.778774	3.30402	2.1598	5.02178e-05	up	AT2G30090	Acyl-CoA N-acyltransferases (NAT) superfamily protein
Ghir_A08G021450	1.62061	0.181077	-3.08247	1.82641e-06	down	AT5G26820	iron-regulated protein 3
Ghir_A08G021470	0	0.0944783	7.2464	7.55123e-06	up	AT1G23380	KNOTTED1-like homeobox gene 6
Ghir_A08G021600	0.162749	57.1107	8.49377	7.17448e-10	up	AT1G56300	Chaperone DnaJ-domain superfamily protein
Ghir_A08G021860	0.320684	3.6e-05	-8.93519	1.08866e-05	down	AT1G09040	unknown protein; FUNCTIONS IN: molecular_function unknown; INVOLVED IN: biological_process unknown; LOCATED IN: membrane; EXPRESSED IN: leaf; BEST Arabidopsis thaliana protein match is: unknown protein (TAIR:AT1G09050.1); Has 614 Blast hits to 567 proteins in 104 species: Archae - 2; Bacteria - 12; Metazoa - 344; Fungi - 31; Plants - 81; Viruses - 0; Other Eukaryotes - 144 (source: NCBI BLink).
Ghir_A08G021950	0.033178	0.185369	2.52729	0.0175405	up	AT1G55020	lipoxygenase 1
Ghir_A08G021990	12.646	4.56466	-1.39191	0.00257338	down	AT3G05330	cyclin family
Ghir_A08G022050	18.4981	7.23218	-1.28619	1.39154e-05	down	AT3G06130	Heavy metal transport/detoxification superfamily protein
Ghir_A08G022500	0.119869	0.512201	2.10941	1.21995e-06	up	AT5G16360	NC domain-containing protein-related
Ghir_A08G022630	0.266277	1.547	2.60033	0.00226486	up	AT5G33370	GDSL-like Lipase/Acylhydrolase superfamily protein
Ghir_A08G022950	2.23808	0.117339	-4.18961	0.0213109	down	AT1G33110	MATE efflux family protein
Ghir_A08G023180	17.0285	33.3534	1.05065	0.00154422	up	AT3G02910	AIG2-like (avirulence induced gene) family protein
Ghir_A08G023220	4.63952	11.1972	1.35786	1.27821e-06	up	AT1G65020	FUNCTIONS IN: molecular_function unknown; INVOLVED IN: biological_process unknown; LOCATED IN: endoplasmic reticulum, plasma membrane; EXPRESSED IN: 23 plant structures; EXPRESSED DURING: 13 growth stages; CONTAINS InterPro DOMAIN/s: NERD (InterPro:IPR011528); Has 69 Blast hits to 69 proteins in 27 species: Archae - 0; Bacteria - 18; Metazoa - 8; Fungi - 0; Plants - 36; Viruses - 0; Other Eukaryo…
Ghir_A08G023840	0.062002	0	-36.2385	1.91185e-13	down	AT3G24080	KRR1 family protein
Ghir_A08G023930	1.20776	4.25849	1.88046	5.93296e-07	up	AT1G65450	HXXXD-type acyl-transferase family protein
Ghir_A08G024120	0.303136	0.141326	-1.03299	0.0478535	down	AT4G10010	Protein kinase superfamily protein
Ghir_A08G024440	1.071	2.49178	1.27943	6.14715e-05	up	AT3G12830	SAUR-like auxin-responsive protein family
Ghir_A08G024780	5.72778	0.813506	-2.76052	1.40319e-06	down	AT4G30410	sequence-specific DNA binding transcription factors
Ghir_A08G024790	0	2.22951	12.3233	4.9036e-15	up	AT5G57800	Fatty acid hydroxylase superfamily
Ghir_A08G024800	0	1.25968	10.3768	6.17765e-05	up	AT4G28050	tetraspanin7
Ghir_A08G025040	0.843166	3.73769	2.24293	8.47532e-06	up	AT2G43290	Calcium-binding EF-hand family protein
Ghir_A08G025180	0.174759	0.0130707	-3.48257	0.012292	down	AT2G35658	unknown protein; FUNCTIONS IN: molecular_function unknown; INVOLVED IN: biological_process unknown; LOCATED IN: cellular_component unknown; BEST Arabidopsis thaliana protein match is: unknown protein (TAIR:AT4G16840.1); Has 30201 Blast hits to 17322 proteins in 780 species: Archae - 12; Bacteria - 1396; Metazoa - 17338; Fungi - 3422; Plants - 5037; Viruses - 0; Other Eukaryotes - 2996 (source: NC…
Ghir_A08G025740	0.881413	0.0173023	-5.44443	0.0142574	down	AT4G29430	ribosomal protein S15A E
Ghir_A08G025830	2.21962	51.3956	4.62112	4.51777e-09	up	AT5G12010	unknown protein; INVOLVED IN: response to salt stress; LOCATED IN: chloroplast, plasma membrane, membrane; EXPRESSED IN: 23 plant structures; EXPRESSED DURING: 13 growth stages; BEST Arabidopsis thaliana protein match is: unknown protein (TAIR:AT4G29780.1); Has 1807 Blast hits to 1807 proteins in 277 species: Archae - 0; Bacteria - 0; Metazoa - 736; Fungi - 347; Plants - 385; Viruses - 0; Other E…
Ghir_A08G025980	0.29193	1.17237	2.08876	0.004409	up	AT5G20885	RING/U-box superfamily protein
Ghir_A08G026000	0	0.68884	8.31713	0.0444186	up	AT1G19210	Integrase-type DNA-binding superfamily protein
Ghir_A08G026150	0.449717	4.43438	3.388	7.6402e-08	up	AT2G26040	PYR1-like 2
Ghir_A08G026230	0	0.0242317	5.92546	0.00078453	up	AT5G11710	ENTH/VHS family protein
Ghir_A08G026550	0.136381	0.498601	1.93893	0.00203242	up	AT4G30850	heptahelical transmembrane protein2
Ghir_A09G000490	15.0048	4.92755	-1.53592	0.0390063	down	AT5G51810	gibberellin 20 oxidase 2
Ghir_A09G000710	0	0.0781497	6.1806	0.0114612	up	AT2G42940	Predicted AT-hook DNA-binding family protein
Ghir_A09G001070	14.8392	2.55737	-2.4456	0.00148061	down	AT3G29320	Glycosyl transferase, family 35
Ghir_A09G001350	1.54553	4.39811	1.60866	0.000451724	up	AT3G29060	EXS (ERD1/XPR1/SYG1) family protein
Ghir_A09G001460	0.288647	6.48219	4.60518	0.0217809	up	AT5G39670	Calcium-binding EF-hand family protein
Ghir_A09G001530	0.966933	22.099	4.57858	0.0264695	up	AT1G26800	RING/U-box superfamily protein
Ghir_A09G001690	0.0121353	5.86221	9.14977	5.37735e-15	up	AT3G28917	mini zinc finger 2
Ghir_A09G001930	0.116633	0	-40.4949	7.29599e-27	down	AT4G08850	Leucine-rich repeat receptor-like protein kinase family protein
Ghir_A09G002920	0	2.30078	11.5762	2.62044e-09	up	AT5G40350	myb domain protein 24
Ghir_A09G003900	0.192951	0.00485967	-5.28517	0.0065815	down	AT5G14180	Myzus persicae-induced lipase 1
Ghir_A09G004370	0	0.0884763	24.908	0.000326081	up	AT3G49000	RNA polymerase III subunit RPC82 family protein
Ghir_A09G005190	1.2567	3.00131	1.33342	0.000646608	up	AT5G51570	SPFH/Band 7/PHB domain-containing membrane-associated protein family
Ghir_A09G005210	0.121074	0.895277	2.92986	4.96043e-08	up	ATCG00680	photosystem II reaction center protein B
Ghir_A09G005480	0.558856	1.69829	1.6618	0.00160867	up	ATCG01060	iron-sulfur cluster binding;electron carriers;4 iron, 4 sulfur cluster binding
Ghir_A09G005560	1.36195	4.36881	1.77667	0.00633115	up	AT1G68510	LOB domain-containing protein 42
Ghir_A09G005620	0.221428	1.85954	3.14143	0.000139839	up	AT1G73830	BR enhanced expression 3
Ghir_A09G005750	0.907829	4.9124	2.50127	1.61836e-06	up	AT3G18260	Reticulon family protein
Ghir_A09G006050	0.014358	0.163384	3.58571	0.000155127	up	AT3G50120	Plant protein of unknown function (DUF247)
Ghir_A09G006690	0.038683	1.17715	4.93329	0.000670249	up	AT2G33380	Caleosin-related family protein
Ghir_A09G006780	0.827899	0.173839	-2.16469	0.00337799	down
Ghir_A09G007820	0.528134	2.80059	2.5082	0.0073656	up	AT4G21510	F-box family protein
Ghir_A09G007830	0.322604	0.797497	1.38889	0.0258067	up	AT4G05000	Vacuolar protein sorting-associated protein VPS28 family protein
Ghir_A09G007900	0	0.081181	7.28308	0.00445794	up
Ghir_A09G008080	0.737128	7.49516	3.44303	0.000228259	up	AT5G44210	erf domain protein 9
Ghir_A09G009800	3.71243	8.43842	1.25813	0.044816	up	AT3G11170	fatty acid desaturase 7
Ghir_A09G010120	25.7797	53.6221	1.13741	1.36897e-05	up	AT2G27830	unknown protein; BEST Arabidopsis thaliana protein match is: unknown protein (TAIR:AT4G22758.1); Has 131 Blast hits to 131 proteins in 17 species: Archae - 0; Bacteria - 0; Metazoa - 0; Fungi - 0; Plants - 131; Viruses - 0; Other Eukaryotes - 0 (source: NCBI BLink).
Ghir_A09G010140	2.36724	5.87127	1.39213	0.000243903	up	AT3G44735	PHYTOSULFOKINE 3 PRECURSOR
Ghir_A09G010180	7.30314	0.442362	-3.9427	0.0363548	down	AT2G27760	tRNAisopentenyltransferase 2
Ghir_A09G010250	0	0.574133	10.2035	0.00371887	up	AT2G27690	cytochrome P450, family 94, subfamily C, polypeptide 1
Ghir_A09G010480	0	0.617153	9.91029	0.00437347	up	AT3G44350	NAC domain containing protein 61
Ghir_A09G010570	0	4.64727	12.3237	4.43744e-20	up	AT3G11600	unknown protein; FUNCTIONS IN: molecular_function unknown; INVOLVED IN: response to karrikin; EXPRESSED IN: 21 plant structures; EXPRESSED DURING: 12 growth stages; BEST Arabidopsis thaliana protein match is: unknown protein (TAIR:AT5G06270.1); Has 171 Blast hits to 171 proteins in 15 species: Archae - 0; Bacteria - 0; Metazoa - 0; Fungi - 0; Plants - 171; Viruses - 0; Other Eukaryotes - 0 (sourc…
Ghir_A09G010580	2.46961	23.7055	3.35387	4.85316e-14	up	AT3G44260	Polynucleotidyl transferase, ribonuclease H-like superfamily protein
Ghir_A09G010810	0.014397	0.202595	3.87192	0.0176735	up	AT3G11840	plant U-box 24
Ghir_A09G011000	0.0802923	0.704002	3.02318	0.0254084	up
Ghir_A09G011060	0.853005	3.3099	2.01615	0.021032	up	ATCG00440	NADH:ubiquinone/plastoquinone oxidoreductase, chain 3 protein
Ghir_A09G011160	3.72224	10.3523	1.57056	0.00024786	up	AT5G04760	Duplicated homeodomain-like superfamily protein
Ghir_A09G011530	0.484267	1.48273	1.7	0.000393465	up	AT2G26980	CBL-interacting protein kinase 3
Ghir_A09G011610	0.695429	0.00360633	-7.36234	0.0287075	down	AT2G26780	ARM repeat superfamily protein
Ghir_A09G011900	0.200989	0.992381	2.3845	0.0173617	up	AT5G46170	F-box family protein
Ghir_A09G012400	32.7586	1.22998	-4.6694	5.87665e-06	down	AT1G72040	P-loop containing nucleoside triphosphate hydrolases superfamily protein
Ghir_A09G012610	0.0900647	2.61491	4.87376	0.000858226	up	AT5G10330	histidinol phosphate aminotransferase 1
Ghir_A09G013120	0	26.9499	28.7208	3.67812e-18	up	AT2G41800	Protein of unknown function, DUF642
Ghir_A09G013680	5.92224	2.342	-1.259	0.0448936	down	AT2G42070	nudix hydrolase homolog 23
Ghir_A09G013820	0	1.62998	24.2053	0.000125579	up	AT1G57860	Translation protein SH3-like family protein
Ghir_A09G014100	0.304193	0.0366493	-2.98241	0.0287176	down	AT5G06560	Protein of unknown function, DUF593
Ghir_A09G014240	2.59197	9.6543	1.97425	2.49233e-07	up	AT3G11820	syntaxin of plants 121
Ghir_A09G014250	0.0173473	0	-4.36993	0.0179207	down	AT5G10530	Concanavalin A-like lectin protein kinase family protein
Ghir_A09G014410	0.556755	0.130264	-2.01654	0.00107043	down	AT3G52490	Double Clp-N motif-containing P-loop nucleoside triphosphate hydrolases superfamily protein
Ghir_A09G014520	0.0857363	0.250576	1.6291	0.00140306	up	AT1G52340	NAD(P)-binding Rossmann-fold superfamily protein
Ghir_A09G014740	9.72169	3.78794	-1.28846	1.2274e-05	down	AT2G27690	cytochrome P450, family 94, subfamily C, polypeptide 1
Ghir_A09G014830	0.083612	1.03936	3.69464	0.00941394	up	AT3G10120	unknown protein; BEST Arabidopsis thaliana protein match is: unknown protein (TAIR:AT5G03890.1); Has 57 Blast hits to 57 proteins in 10 species: Archae - 0; Bacteria - 0; Metazoa - 0; Fungi - 0; Plants - 57; Viruses - 0; Other Eukaryotes - 0 (source: NCBI BLink).
Ghir_A09G015850	1.70165	4.18033	1.38147	0.000284742	up	AT5G03230	Protein of unknown function, DUF584
Ghir_A09G016000	0.00709967	0.759863	6.6519	2.40883e-06	up	AT2G37130	Peroxidase superfamily protein
Ghir_A09G016060	0.00900333	0.273167	5.12888	1.39813e-07	up	AT2G37090	Nucleotide-diphospho-sugar transferases superfamily protein
Ghir_A09G016620	0.074682	0.27542	1.97107	0.0492223	up	AT2G37550	ARF-GAP domain 7
Ghir_A09G016630	1.98993	17.8367	3.24412	7.29265e-15	up	AT5G02540	NAD(P)-binding Rossmann-fold superfamily protein
Ghir_A09G016690	37.9946	2.35927	-3.95449	0.0142472	down	AT3G53670	unknown protein; FUNCTIONS IN: molecular_function unknown; INVOLVED IN: biological_process unknown; LOCATED IN: cellular_component unknown; EXPRESSED IN: sperm cell, male gametophyte, pollen tube; EXPRESSED DURING: L mature pollen stage, M germinated pollen stage; BEST Arabidopsis thaliana protein match is: unknown protein (TAIR:AT2G37480.1).
Ghir_A09G016760	0.269852	1.9385	2.93647	0.00192197	up	AT2G37430	C2H2 and C2HC zinc fingers superfamily protein
Ghir_A09G017520	1.95787	4.04625	1.13321	0.0259545	up	AT4G33070	Thiamine pyrophosphate dependent pyruvate decarboxylase family protein
Ghir_A09G017580	9.63853	3.29278	-1.47446	0.0281485	down	AT5G01600	ferretin 1
Ghir_A09G017810	1.34384	0.144964	-3.1328	0.00331512	down	AT1G80770	P-loop containing nucleoside triphosphate hydrolases superfamily protein
Ghir_A09G017860	2.32763	5.77401	1.39929	6.39124e-05	up	AT5G62920	response regulator 6
Ghir_A09G018370	5.4666	1.54968	-1.75063	0.0405589	down	AT1G73680	alpha dioxygenase
Ghir_A09G019120	0.0872113	0.00421767	-4.1043	0.00401434	down	AT5G53310	myosin heavy chain-related
Ghir_A09G019460	40.272	81.1312	1.08324	0.02839	up	AT5G24510	60S acidic ribosomal protein family
Ghir_A09G019470	0.770723	10.4909	3.86158	6.09194e-05	up	AT5G54165	unknown protein; FUNCTIONS IN: molecular_function unknown; INVOLVED IN: biological_process unknown; LOCATED IN: cellular_component unknown; Has 30201 Blast hits to 17322 proteins in 780 species: Archae - 12; Bacteria - 1396; Metazoa - 17338; Fungi - 3422; Plants - 5037; Viruses - 0; Other Eukaryotes - 2996 (source: NCBI BLink).
Ghir_A09G019490	0.512851	3.14165	2.74195	0.0252333	up	AT3G49530	NAC domain containing protein 62
Ghir_A09G020410	0.0465957	0.477778	3.4292	5.0591e-05	up	AT1G12240	Glycosyl hydrolases family 32 protein
Ghir_A09G020710	0	0.103427	7.75068	0.00169069	up	AT1G05160	cytochrome P450, family 88, subfamily A, polypeptide 3
Ghir_A09G021090	0.142253	0.000598667	-7.25944	0.0110852	down	AT2G33170	Leucine-rich repeat receptor-like protein kinase family protein
Ghir_A09G022160	19.0469	8.19059	-1.136	0.0134952	down	AT2G30700	unknown protein; BEST Arabidopsis thaliana protein match is: unknown protein (TAIR:AT1G61900.1); Has 68 Blast hits to 67 proteins in 13 species: Archae - 0; Bacteria - 2; Metazoa - 0; Fungi - 0; Plants - 66; Viruses - 0; Other Eukaryotes - 0 (source: NCBI BLink).
Ghir_A09G022210	0.00554633	5.02451	9.82892	9.55103e-05	up	AT3G54420	homolog of carrot EP3-3 chitinase
Ghir_A09G022230	1.31288	0.459063	-1.42508	0.00568005	down	AT5G49040	Disease resistance-responsive (dirigent-like protein) family protein
Ghir_A09G022240	0.152797	2.19793	3.95114	2.0502e-06	up	AT3G54420	homolog of carrot EP3-3 chitinase
Ghir_A09G022710	11.9422	26.0761	1.21444	0.0204578	up	AT3G51550	Malectin/receptor-like protein kinase family protein
Ghir_A09G022810	0.032309	0.235997	2.89562	0.0382791	up	AT5G19260	Protein of unknown function (DUF3049)
Ghir_A09G022920	0.007792	0	-17.5154	1.87736e-05	down
Ghir_A09G023190	0.0101413	0.420041	5.35996	1.42381e-08	up	AT3G22620	Bifunctional inhibitor/lipid-transfer protein/seed storage 2S albumin superfamily protein
Ghir_A09G023460	0.287281	3.58507	3.74171	4.91527e-09	up	AT3G22910	ATPase E1-E2 type family protein / haloacid dehalogenase-like hydrolase family protein
Ghir_A09G023470	2.28869	8.5595	1.99654	0.000103263	up	AT3G22930	calmodulin-like 11
Ghir_A09G023530	0.318714	5.21858	4.12279	0.000911038	up	AT3G63380	ATPase E1-E2 type family protein / haloacid dehalogenase-like hydrolase family protein
Ghir_A09G024360	0.60453	15.1818	4.72337	1.05227e-36	up	AT3G23360	Protein phosphatase 2C family protein
Ghir_A09G025160	0.00922667	1.1578	6.77787	0.0452047	up	AT5G46940	Plant invertase/pectin methylesterase inhibitor superfamily protein
Ghir_A09G025170	3.50582	50.8749	3.93227	0.049904	up	AT3G16720	TOXICOS EN LEVADURA 2
Ghir_A09G025270	4.49245	1.18818	-1.82742	0.00431673	down	AT3G16630	P-loop containing nucleoside triphosphate hydrolases superfamily protein
Ghir_A09G025650	11.9068	2.10688	-2.40949	0.0222207	down	AT2G47160	HCO3- transporter family
Ghir_A09G026330	28.1371	62.8357	1.24333	6.5428e-07	up	AT5G61790	calnexin 1
Ghir_A09G026480	0.046043	1.71347	5.20078	0.0128076	up
Ghir_A10G000070	0	0.837314	10.5189	9.8956e-05	up	AT5G23960	terpene synthase 21
Ghir_A10G000110	12.4361	5.48805	-1.11626	0.0163432	down	AT4G20440	small nuclear ribonucleoprotein associated protein B
Ghir_A10G000390	2.62383	6.00902	1.26846	0.00487021	up	AT2G35760	Uncharacterised protein family (UPF0497)
Ghir_A10G000680	2.06134	0.387301	-2.30622	4.95277e-05	down	AT3G21630	chitin elicitor receptor kinase 1
Ghir_A10G000750	1.8733	5.18329	1.54586	0.0114355	up	AT1G05100	mitogen-activated protein kinase kinase kinase 18
Ghir_A10G000760	6.67522	17.3131	1.46074	1.58919e-05	up	AT5G42570	B-cell receptor-associated 31-like
Ghir_A10G002440	0.664549	23.7441	5.33096	7.44434e-05	up	AT5G44210	erf domain protein 9
Ghir_A10G002530	0.015915	0.769808	5.38104	0.0182823	up	AT1G28480	Thioredoxin superfamily protein
Ghir_A10G002600	0.857919	0.0168887	-5.53895	6.69549e-06	down	AT2G33880	homeobox-3
Ghir_A10G003220	0.836046	3.68067	2.23001	1.1248e-05	up	AT1G29280	WRKY DNA-binding protein 65
Ghir_A10G003250	7.98691	17.2036	1.20415	0.00647851	up
Ghir_A10G003360	0.0618373	0.752279	3.63254	7.94293e-06	up	AT2G38300	myb-like HTH transcriptional regulator family protein
Ghir_A10G003410	0.241189	0.0428083	-2.40522	0.00680376	down	AT1G29195	unknown protein; FUNCTIONS IN: molecular_function unknown; INVOLVED IN: biological_process unknown; LOCATED IN: chloroplast; EXPRESSED IN: 13 plant structures; EXPRESSED DURING: 4 anthesis, C globular stage, 4 leaf senescence stage, petal differentiation and expansion stage; BEST Arabidopsis thaliana protein match is: unknown protein (TAIR:AT2G30230.1); Has 180 Blast hits to 180 proteins in 14 sp…
Ghir_A10G003490	8.44615	0.801918	-3.31391	5.10949e-13	down
Ghir_A10G003760	16.2039	0	-30.6468	1.58535e-06	down	AT2G34480	Ribosomal protein L18ae/LX family protein
Ghir_A10G003790	4.12255	8.68592	1.16137	0.0365708	up	AT5G46250	RNA-binding protein
Ghir_A10G003820	0.0396733	0.237175	2.61406	0.0176219	up	AT5G46240	potassium channel in Arabidopsis thaliana 1
Ghir_A10G004210	0.178046	0.0122503	-3.53292	0.04363	down	AT2G34630	geranyl diphosphate synthase 1
Ghir_A10G004790	0	0.0320477	5.86854	0.0460741	up	AT3G14310	pectin methylesterase 3
Ghir_A10G004840	0.19469	6.57936	5.1305	4.14884e-07	up	AT1G53903	Protein of unknown function (DUF581)
Ghir_A10G004930	0.529715	9.63322	4.25479	2.16462e-05	up	AT1G72430	SAUR-like auxin-responsive protein family
Ghir_A10G005330	5.65848	17.1078	1.68003	0.000439205	up	AT1G72450	jasmonate-zim-domain protein 6
Ghir_A10G005430	1.55335	9.21942	2.66973	2.09282e-05	up	AT1G72790	hydroxyproline-rich glycoprotein family protein
Ghir_A10G005540	9.39668	0.00934167	-9.69964	0.00156367	down	AT1G72970	Glucose-methanol-choline (GMC) oxidoreductase family protein
Ghir_A10G005600	0	0.021182	42.291	2.52132e-53	up	AT3G13790	Glycosyl hydrolases family 32 protein
Ghir_A10G005830	0.499417	2.57023	2.42611	7.37372e-09	up	AT1G17710	Pyridoxal phosphate phosphatase-related protein
Ghir_A10G007440	1.41376	0.424495	-1.66493	0.0125207	down	AT3G15630	unknown protein; FUNCTIONS IN: molecular_function unknown; INVOLVED IN: biological_process unknown; LOCATED IN: chloroplast; EXPRESSED IN: 24 plant structures; EXPRESSED DURING: 15 growth stages; BEST Arabidopsis thaliana protein match is: unknown protein (TAIR:AT1G52720.1); Has 61 Blast hits to 61 proteins in 13 species: Archae - 0; Bacteria - 0; Metazoa - 0; Fungi - 0; Plants - 61; Viruses - 0;…
Ghir_A10G008910	0	0.667947	9.26132	0.00712961	up	AT4G37290	unknown protein; FUNCTIONS IN: molecular_function unknown; INVOLVED IN: response to karrikin; LOCATED IN: endomembrane system; EXPRESSED IN: cotyledon, hypocotyl, leaf; EXPRESSED DURING: LP.04 four leaves visible; BEST Arabidopsis thaliana protein match is: unknown protein (TAIR:AT2G23270.1); Has 30201 Blast hits to 17322 proteins in 780 species: Archae - 12; Bacteria - 1396; Metazoa - 17338; Fun…
Ghir_A10G008950	3.2728	1.36244	-1.19107	0.0220857	down	AT3G50210	2-oxoglutarate (2OG) and Fe(II)-dependent oxygenase superfamily protein
Ghir_A10G009030	0.33874	1.47594	2.21482	0.0382791	up	AT3G19150	KIP-related protein 6
Ghir_A10G009140	1.89647	0.467501	-1.93509	0.0494036	down	AT3G50410	OBF binding protein 1
Ghir_A10G009270	0.318647	1.85436	2.62441	1.58683e-05	up	AT4G33920	Protein phosphatase 2C family protein
Ghir_A10G009380	1.2851	0.179843	-2.69925	0.0117487	down	AT1G75250	RAD-like 6
Ghir_A10G009620	0.444638	5.11077	3.6326	0.00066573	up	AT1G15380	Lactoylglutathione lyase / glyoxalase I family protein
Ghir_A10G010190	0.19098	18.6702	6.67326	5.84351e-17	up	AT4G15630	Uncharacterised protein family (UPF0497)
Ghir_A10G010290	0.000818667	0.181716	7.9366	0.000372012	up	AT2G28290	P-loop containing nucleoside triphosphate hydrolases superfamily protein
Ghir_A10G010460	0	0.0194827	5.3282	0.00075123	up	AT5G18840	Major facilitator superfamily protein
Ghir_A10G010480	0.604117	1.52436	1.40058	0.00042369	up	AT5G18850	unknown protein; FUNCTIONS IN: molecular_function unknown; INVOLVED IN: biological_process unknown; LOCATED IN: endomembrane system; EXPRESSED IN: 23 plant structures; EXPRESSED DURING: 13 growth stages; Has 1807 Blast hits to 1807 proteins in 277 species: Archae - 0; Bacteria - 0; Metazoa - 736; Fungi - 347; Plants - 385; Viruses - 0; Other Eukaryotes - 339 (source: NCBI BLink).
Ghir_A10G010530	27.062	145.117	2.54055	0.0185191	up	AT3G21570	unknown protein; Has 43 Blast hits to 43 proteins in 13 species: Archae - 0; Bacteria - 0; Metazoa - 0; Fungi - 0; Plants - 43; Viruses - 0; Other Eukaryotes - 0 (source: NCBI BLink).
Ghir_A10G010980	0.120608	0.558986	2.13302	0.0154582	up	AT3G25400	CONTAINS InterPro DOMAIN/s: NTP Pyrophosphohydrolase MazG-related, RS21-C6 (InterPro:IPR011394), EAR (InterPro:IPR009039), NTP pyrophosphohydrolase MazG, putative catalytic core (InterPro:IPR004518); Has 1123 Blast hits to 1121 proteins in 452 species: Archae - 22; Bacteria - 753; Metazoa - 81; Fungi - 3; Plants - 83; Viruses - 0; Other Eukaryotes - 181 (source: NCBI BLink).
Ghir_A10G011340	3.77102	9.0787	1.35513	0.0265034	up	AT4G14450	unknown protein; LOCATED IN: chloroplast; BEST Arabidopsis thaliana protein match is: unknown protein (TAIR:AT3G23170.1); Has 74 Blast hits to 74 proteins in 6 species: Archae - 0; Bacteria - 0; Metazoa - 0; Fungi - 0; Plants - 74; Viruses - 0; Other Eukaryotes - 0 (source: NCBI BLink).
Ghir_A10G011830	5.15864	1.77425	-1.47323	0.00542367	down	AT3G63410	S-adenosyl-L-methionine-dependent methyltransferases superfamily protein
Ghir_A10G011980	0.057727	0.292019	2.44601	0.00143268	up	AT1G04220	3-ketoacyl-CoA synthase 2
Ghir_A10G013100	0.96299	2.36528	1.36126	0.0131912	up	AT4G14010	ralf-like 32
Ghir_A10G013730	2.77611	0	-27.4474	3.19357e-06	down	AT2G43160	ENTH/VHS family protein
Ghir_A10G013900	1.59609	0.113177	-3.71245	0.0157527	down	AT3G59390	unknown protein; FUNCTIONS IN: molecular_function unknown; INVOLVED IN: biological_process unknown; LOCATED IN: endomembrane system; EXPRESSED IN: 22 plant structures; EXPRESSED DURING: 13 growth stages; CONTAINS InterPro DOMAIN/s: Protein of unknown function DUF2054 (InterPro:IPR019352); Has 184 Blast hits to 184 proteins in 72 species: Archae - 0; Bacteria - 0; Metazoa - 116; Fungi - 0; Plants …
Ghir_A10G013910	0.69927	0.25329	-1.41438	0.0476898	down	AT3G59400	enzyme binding;tetrapyrrole binding
Ghir_A10G013980	21.0628	42.077	1.08936	0.00374354	up	AT2G43290	Calcium-binding EF-hand family protein
Ghir_A10G015180	0.063926	0.220647	1.79972	0.00481307	up	AT2G38500	2-oxoglutarate (2OG) and Fe(II)-dependent oxygenase superfamily protein
Ghir_A10G015720	0.201614	1.56876	3.00592	0.020264	up	AT2G42690	alpha/beta-Hydrolases superfamily protein
Ghir_A10G016310	0.0827297	0.29767	1.89941	0.00341787	up	AT3G27250	unknown protein; BEST Arabidopsis thaliana protein match is: unknown protein (TAIR:AT5G40800.1); Has 104 Blast hits to 104 proteins in 13 species: Archae - 0; Bacteria - 0; Metazoa - 0; Fungi - 0; Plants - 104; Viruses - 0; Other Eukaryotes - 0 (source: NCBI BLink).
Ghir_A10G017270	4.37516	10.6631	1.38424	0.0129393	up
Ghir_A10G017390	0.0248617	1.32226	5.80091	1.70908e-05	up
Ghir_A10G017720	1.90016	10.5337	2.56253	0.0283614	up	AT5G49480	Ca2+-binding protein 1
Ghir_A10G018940	0.00415567	0.781844	7.32274	0.00825511	up	AT3G49880	glycosyl hydrolase family protein 43
Ghir_A10G019040	0.258573	0.101936	-1.25139	0.0432042	down	AT3G07960	Phosphatidylinositol-4-phosphate 5-kinase family protein
Ghir_A10G020060	3.77823	0.794211	-2.17413	0.0452457	down	AT3G10640	SNF7 family protein
Ghir_A10G020670	0.287541	0	-8.57297	7.23102e-05	down
Ghir_A10G020930	4.80742	16.6734	1.85404	0.047867	up	AT3G54810	Plant-specific GATA-type zinc finger transcription factor family protein
Ghir_A10G021050	0.378504	0	-38.9035	9.63507e-22	down	AT2G39220	PATATIN-like protein 6
Ghir_A10G021140	1.03802	0.479034	-1.02885	0.015783	down	AT3G52270	Transcription initiation factor IIF, beta subunit
Ghir_A10G021400	0.249874	2.39254	3.33205	0.000164852	up	AT2G39370	unknown protein; BEST Arabidopsis thaliana protein match is: unknown protein (TAIR:AT2G37380.1); Has 184 Blast hits to 178 proteins in 53 species: Archae - 0; Bacteria - 58; Metazoa - 9; Fungi - 0; Plants - 103; Viruses - 0; Other Eukaryotes - 14 (source: NCBI BLink).
Ghir_A10G021880	0	2.74616	11.4259	5.2662e-09	up	AT1G17860	Kunitz family trypsin and protease inhibitor protein
Ghir_A10G021910	0	1.09784	10.0833	2.82348e-06	up	AT1G17860	Kunitz family trypsin and protease inhibitor protein
Ghir_A10G022040	0.419208	1.48952	1.90186	1.14719e-09	up	AT1G75560	zinc knuckle (CCHC-type) family protein
Ghir_A10G022620	1.13706	8.94908	3.09342	2.749e-07	up	AT3G55550	Concanavalin A-like lectin protein kinase family protein
Ghir_A10G022780	5.96897	12.6001	1.16618	0.0262962	up	AT2G39770	Glucose-1-phosphate adenylyltransferase family protein
Ghir_A10G023290	11.3564	3.89218	-1.47358	0.0494566	down	AT5G05830	RING/FYVE/PHD zinc finger superfamily protein
Ghir_A10G023650	0.0488253	0.721712	3.95037	0.00429314	up	AT2G39980	HXXXD-type acyl-transferase family protein
Ghir_A10G023660	0.191575	3.07607	4.07903	6.57326e-11	up	AT2G39980	HXXXD-type acyl-transferase family protein
Ghir_A10G023690	5.47666	15.8467	1.60992	7.09845e-13	up	AT2G45960	plasma membrane intrinsic protein 1B
Ghir_A10G023720	1.31297	7.67157	2.63727	0.000319523	up	AT2G40000	ortholog of sugar beet HS1 PRO-1 2
Ghir_A10G023950	2.96359	10.185	1.86709	0.00317539	up	AT4G01500	AP2/B3-like transcriptional factor family protein
Ghir_A10G024040	0.167163	1.05544	2.75251	0.00204022	up	AT3G55950	CRINKLY4 related 3
Ghir_A10G024050	1.07083	2.68586	1.4055	0.0363548	up	AT3G26300	cytochrome P450, family 71, subfamily B, polypeptide 34
Ghir_A10G024070	9.71572	3.44091	-1.42614	0.000980379	down	AT3G55960	Haloacid dehalogenase-like hydrolase (HAD) superfamily protein
Ghir_A10G024140	19.161	117.226	2.70809	1.96265e-08	up	AT2G40140	zinc finger (CCCH-type) family protein
Ghir_A10G024160	6.16916	2.52765	-1.22527	0.0348137	down	AT5G05580	fatty acid desaturase 8
Ghir_A10G024370	0.117906	0.515067	2.18414	0.00213725	up	AT3G11110	RING/U-box superfamily protein
Ghir_A11G000150	1.23562	3.77307	1.69265	0.000561143	up	AT5G41010	DNA directed RNA polymerase, 7 kDa subunit
Ghir_A11G000340	0.0415707	1.0686	4.64899	2.25778e-08	up	AT1G18200	RAB GTPase homolog A6B
Ghir_A11G000910	0.343525	22.5539	6.14221	1.1112e-10	up	AT5G51990	C-repeat-binding factor 4
Ghir_A11G000920	0.0146833	2.69886	7.48172	1.12061e-11	up	AT5G52020	Integrase-type DNA-binding superfamily protein
Ghir_A11G001490	0	0.00441267	23.1127	2.30885e-05	up	AT5G24270	Calcium-binding EF-hand family protein
Ghir_A11G001700	4.77824	12.1091	1.43179	0.014303	up	AT4G35580	NAC transcription factor-like 9
Ghir_A11G001960	10.8804	35.6341	1.79184	3.98545e-05	up	AT5G42020	Heat shock protein 70 (Hsp 70) family protein
Ghir_A11G002000	19.2251	54.4759	1.58379	1.30194e-05	up	AT5G42020	Heat shock protein 70 (Hsp 70) family protein
Ghir_A11G002430	8.99269	39.0341	2.17595	0.003949	up	AT1G64230	ubiquitin-conjugating enzyme 28
Ghir_A11G002620	13.9717	2.34863	-2.49224	0.0483419	down	AT4G12510	Bifunctional inhibitor/lipid-transfer protein/seed storage 2S albumin superfamily protein
Ghir_A11G002660	16.4356	1.33675	-3.55734	0.0089008	down	AT4G12510	Bifunctional inhibitor/lipid-transfer protein/seed storage 2S albumin superfamily protein
Ghir_A11G002820	6.49686	14.5686	1.26107	0.00680376	up	AT5G47370	Homeobox-leucine zipper protein 4 (HB-4) / HD-ZIP protein
Ghir_A11G002850	0.0734473	0.699145	3.33566	0.000970142	up	AT4G16820	alpha/beta-Hydrolases superfamily protein
Ghir_A11G003540	16.0547	33.0022	1.11687	0.00437347	up	AT5G39850	Ribosomal protein S4
Ghir_A11G003570	2.39077	0.382894	-2.5782	0.00680559	down	AT3G47620	TEOSINTE BRANCHED, cycloidea and PCF (TCP) 14
Ghir_A11G003630	4.66022	10.1884	1.19981	0.00450297	up	AT5G62440	Protein of unknown function (DUF3223)
Ghir_A11G004020	0.068705	1.2038	4.14282	0.00817559	up	AT1G18530	EF hand calcium-binding protein family
Ghir_A11G004090	9.33468	3.56019	-1.31068	0.0271191	down	AT1G13440	glyceraldehyde-3-phosphate dehydrogenase C2
Ghir_A11G004140	0.003638	1.81532	8.87781	0.00055662	up	AT1G76650	calmodulin-like 38
Ghir_A11G004510	11.0135	1.74903	-2.58289	2.15859e-07	down	AT5G07580	Integrase-type DNA-binding superfamily protein
Ghir_A11G004820	0.057345	2.7171	5.55965	0.00289271	up	AT2G17790	VPS35 homolog A
Ghir_A11G005110	13.4598	36.2572	1.49514	0.00421365	up	AT5G66985	unknown protein; Has 30201 Blast hits to 17322 proteins in 780 species: Archae - 12; Bacteria - 1396; Metazoa - 17338; Fungi - 3422; Plants - 5037; Viruses - 0; Other Eukaryotes - 2996 (source: NCBI BLink).
Ghir_A11G005300	0.137915	0.650213	2.31279	0.000260067	up	AT5G67210	Protein of unknown function (DUF579)
Ghir_A11G005470	0.0632247	1.93692	5.02028	3.29486e-05	up	AT2G22880	VQ motif-containing protein
Ghir_A11G005500	0.523902	1.51652	1.58262	0.00460158	up	AT4G37790	Homeobox-leucine zipper protein family
Ghir_A11G005850	0.0415517	0	-5.92831	0.0470379	down	AT5G10260	RAB GTPase homolog H1E
Ghir_A11G006010	0.0906107	0.42874	2.30271	0.0490022	up	AT1G16850	unknown protein; FUNCTIONS IN: molecular_function unknown; INVOLVED IN: response to salt stress; LOCATED IN: endomembrane system; EXPRESSED IN: leaf apex, leaf whorl, male gametophyte, flower, leaf; EXPRESSED DURING: LP.06 six leaves visible, LP.04 four leaves visible, LP.10 ten leaves visible, petal differentiation and expansion stage, LP.08 eight leaves visible; BEST Arabidopsis thaliana protei…
Ghir_A11G006160	3.07132	6.34894	1.11975	0.0013779	up	AT3G51520	diacylglycerol acyltransferase family
Ghir_A11G006220	1.98789	7.46906	1.99361	0.00119673	up	AT5G64660	CYS, MET, PRO, and GLY protein 2
Ghir_A11G006630	1.71591	6.94604	2.08301	0.00142161	up	AT5G13870	xyloglucan endotransglucosylase/hydrolase 5
Ghir_A11G007660	0.343698	2.93586	3.17079	0.000216685	up
Ghir_A11G007680	0.327354	4.81678	3.99864	2.71228e-05	up	AT5G39680	Pentatricopeptide repeat (PPR) superfamily protein
Ghir_A11G007870	7.30046	27.3503	1.99971	0.00193104	up	AT3G29360	UDP-glucose 6-dehydrogenase family protein
Ghir_A11G008460	0.0280093	0.522153	4.26812	0.00893803	up	AT4G00050	basic helix-loop-helix (bHLH) DNA-binding superfamily protein
Ghir_A11G008470	0.260098	1.69707	2.79549	8.70233e-05	up	AT2G45080	cyclin p3;1
Ghir_A11G008610	0.253315	0.00653267	-5.06249	0.0107888	down	AT2G45190	Plant-specific transcription factor YABBY family protein
Ghir_A11G009980	0.431721	2.78586	2.79571	0.00089893	up	AT1G01470	Late embryogenesis abundant protein
Ghir_A11G010730	14.6113	75.8696	2.45378	0.0477916	up	AT2G46660	cytochrome P450, family 78, subfamily A, polypeptide 6
Ghir_A11G011050	0	0.113184	23.9945	0.000623589	up	AT3G49530	NAC domain containing protein 62
Ghir_A11G011170	0.077836	2.05896	4.7378	0.0223738	up	AT2G47070	squamosa promoter binding protein-like 1
Ghir_A11G011200	1.34217	4.96575	1.95817	3.9069e-07	up	AT1G75250	RAD-like 6
Ghir_A11G011370	0.550131	2.28771	2.14781	0.00278031	up	AT2G46940	unknown protein; BEST Arabidopsis thaliana protein match is: unknown protein (TAIR:AT3G62070.1); Has 143 Blast hits to 141 proteins in 14 species: Archae - 0; Bacteria - 0; Metazoa - 4; Fungi - 0; Plants - 139; Viruses - 0; Other Eukaryotes - 0 (source: NCBI BLink).
Ghir_A11G011740	0.0866957	4.82512	5.85218	1.66612e-18	up	AT2G16760	Calcium-dependent phosphotriesterase superfamily protein
Ghir_A11G011950	0.077948	0.492159	2.70686	0.0427421	up	AT1G67030	zinc finger protein 6
Ghir_A11G012010	3.54549	12.2459	1.86033	3.58243e-05	up	AT2G47485	unknown protein; BEST Arabidopsis thaliana protein match is: unknown protein (TAIR:AT3G62650.1); Has 35333 Blast hits to 34131 proteins in 2444 species: Archae - 798; Bacteria - 22429; Metazoa - 974; Fungi - 991; Plants - 531; Viruses - 0; Other Eukaryotes - 9610 (source: NCBI BLink).
Ghir_A11G012080	0.00667533	1.78886	7.89364	0.00110552	up	AT5G64260	EXORDIUM like 2
Ghir_A11G012360	0.72349	0.247091	-1.48593	0.0256471	down	AT2G47750	putative indole-3-acetic acid-amido synthetase GH3.9
Ghir_A11G012530	9.2593	31.8456	1.87728	0.0324857	up	AT4G15630	Uncharacterised protein family (UPF0497)
Ghir_A11G012880	0.145734	4.22321	4.91926	9.53528e-08	up	AT2G48110	reduced epidermal fluorescence 4
Ghir_A11G013030	0	0.267741	8.62589	0.0475436	up	AT4G17970	aluminum-activated, malate transporter 12
Ghir_A11G013470	4.12615	1.47673	-1.40619	0.0067035	down	AT3G04730	indoleacetic acid-induced protein 16
Ghir_A11G013830	0	0.152638	7.82621	7.75867e-05	up	AT3G02100	UDP-Glycosyltransferase superfamily protein
Ghir_A11G014330	1.40713	7.29186	2.47728	0.000257716	up	AT5G07990	Cytochrome P450 superfamily protein
Ghir_A11G014830	0.450036	2.91369	2.79883	0.000734724	up	AT5G48655	RING/U-box superfamily protein
Ghir_A11G014890	0.454159	1.08951	1.34553	0.044202	up
Ghir_A11G015130	0.0548983	0.29376	2.38572	0.0170738	up	AT3G25400	CONTAINS InterPro DOMAIN/s: NTP Pyrophosphohydrolase MazG-related, RS21-C6 (InterPro:IPR011394), EAR (InterPro:IPR009039), NTP pyrophosphohydrolase MazG, putative catalytic core (InterPro:IPR004518); Has 1123 Blast hits to 1121 proteins in 452 species: Archae - 22; Bacteria - 753; Metazoa - 81; Fungi - 3; Plants - 83; Viruses - 0; Other Eukaryotes - 181 (source: NCBI BLink).
Ghir_A11G015580	13.6359	5.2816	-1.30525	0.033817	down	AT1G61520	photosystem I light harvesting complex gene 3
Ghir_A11G015730	0.724163	4.46817	2.69812	0.0117655	up	AT2G04240	RING/U-box superfamily protein
Ghir_A11G016180	18.5537	40.2642	1.20126	7.99062e-06	up	AT1G04980	PDI-like 2-2
Ghir_A11G016350	0.0911667	0.295364	1.7481	0.00926838	up	AT4G15417	RNAse II-like 1
Ghir_A11G017260	3.47899	0.170314	-4.29488	1.60222e-05	down	AT5G38430	Ribulose bisphosphate carboxylase (small chain) family protein
Ghir_A11G017860	0.41624	1.13569	1.53495	0.00342573	up	AT5G37490	ARM repeat superfamily protein
Ghir_A11G018190	0.104931	0.600275	2.56418	3.2529e-05	up	AT5G16110	unknown protein; FUNCTIONS IN: molecular_function unknown; INVOLVED IN: biological_process unknown; LOCATED IN: chloroplast; EXPRESSED IN: 24 plant structures; EXPRESSED DURING: 15 growth stages; BEST Arabidopsis thaliana protein match is: unknown protein (TAIR:AT3G02555.1); Has 133 Blast hits to 133 proteins in 18 species: Archae - 0; Bacteria - 0; Metazoa - 0; Fungi - 0; Plants - 133; Viruses -…
Ghir_A11G018450	1.88195	0.26902	-2.74953	0.0337701	down	AT5G66190	ferredoxin-NADP(+)-oxidoreductase 1
Ghir_A11G019160	0.0715083	0.779953	3.48669	0.0446339	up	AT2G18160	basic leucine-zipper 2
Ghir_A11G019490	2.37329	0.916257	-1.29204	0.0484178	down	AT3G50660	Cytochrome P450 superfamily protein
Ghir_A11G019710	11.4639	41.4012	1.91409	0.012292	up	AT4G36740	homeobox protein 40
Ghir_A11G019810	0.530265	1.80061	1.85773	0.0432013	up	AT3G50770	calmodulin-like 41
Ghir_A11G019870	1.81507	10.3555	2.59496	6.97373e-09	up	AT2G23690	unknown protein; FUNCTIONS IN: molecular_function unknown; INVOLVED IN: N-terminal protein myristoylation; LOCATED IN: cellular_component unknown; EXPRESSED IN: 7 plant structures; EXPRESSED DURING: petal differentiation and expansion stage; BEST Arabidopsis thaliana protein match is: unknown protein (TAIR:AT4G37240.1); Has 243 Blast hits to 243 proteins in 15 species: Archae - 0; Bacteria - 0; M…
Ghir_A11G019900	23.2057	4.6374	-2.26115	0.000563136	down	AT3G50820	photosystem II subunit O-2
Ghir_A11G020040	1.87998	5.34081	1.57918	2.58131e-05	up	AT2G23620	methyl esterase 1
Ghir_A11G020360	8.62904	3.35861	-1.28088	0.0463046	down	AT5G66800	unknown protein; BEST Arabidopsis thaliana protein match is: unknown protein (TAIR:AT3G50640.1); Has 1807 Blast hits to 1807 proteins in 277 species: Archae - 0; Bacteria - 0; Metazoa - 736; Fungi - 347; Plants - 385; Viruses - 0; Other Eukaryotes - 339 (source: NCBI BLink).
Ghir_A11G020840	6.31466	16.8714	1.49577	0.0113417	up	AT1G10370	Glutathione S-transferase family protein
Ghir_A11G022030	4.46134	1.41931	-1.58639	0.0368241	down	AT5G65470	O-fucosyltransferase family protein
Ghir_A11G022200	0.703828	4.42571	2.71976	1.9196e-05	up
Ghir_A11G022320	1.62973	6.96559	2.18299	1.48521e-08	up	AT2G22680	Zinc finger (C3HC4-type RING finger) family protein
Ghir_A11G022600	6.41973	3.0301	-1.00944	0.0272948	down	AT4G37750	Integrase-type DNA-binding superfamily protein
Ghir_A11G022810	0.924714	0.0788083	-3.45975	0.0307704	down	AT5G67570	Tetratricopeptide repeat (TPR)-like superfamily protein
Ghir_A11G022970	0.202606	1.26199	2.72434	1.69036e-08	up	AT1G27730	salt tolerance zinc finger
Ghir_A11G023140	0.987552	2.00687	1.12	0.0193004	up	AT4G33920	Protein phosphatase 2C family protein
Ghir_A11G023290	0.0127743	0.296201	4.51109	0.0180261	up	AT2G14960	Auxin-responsive GH3 family protein
Ghir_A11G024710	0.416839	1.73246	2.12303	0.000326081	up	AT1G08810	myb domain protein 60
Ghir_A11G024900	1.01649	0.125315	-2.9382	0.00164446	down	AT5G17860	calcium exchanger 7
Ghir_A11G025100	0.779783	1.70378	1.20432	0.00589815	up	AT5G39890	Protein of unknown function (DUF1637)
Ghir_A11G026590	12.0678	3.78111	-1.59359	3.89107e-05	down	AT1G08590	Leucine-rich receptor-like protein kinase family protein
Ghir_A11G026760	0.279011	0.0590693	-2.11274	0.0258256	down	AT5G09225	unknown protein; FUNCTIONS IN: molecular_function unknown; INVOLVED IN: biological_process unknown; LOCATED IN: endomembrane system; Has 35333 Blast hits to 34131 proteins in 2444 species: Archae - 798; Bacteria - 22429; Metazoa - 974; Fungi - 991; Plants - 531; Viruses - 0; Other Eukaryotes - 9610 (source: NCBI BLink).
Ghir_A11G028620	0.403958	1.44663	1.92185	0.0338362	up	AT3G05290	peroxisomal adenine nucleotide carrier 1
Ghir_A11G028690	0.179126	0.0336737	-2.15774	0.0019938	down	AT3G05345	Chaperone DnaJ-domain superfamily protein
Ghir_A11G028910	11.6692	2.17828	-2.34568	6.10118e-09	down	AT3G05470	Actin-binding FH2 (formin homology 2) family protein
Ghir_A11G028990	1.66293	0	-27.1938	5.46819e-05	down	AT5G27730	Protein of unknown function (DUF1624)
Ghir_A11G029460	14.2844	6.37162	-1.09289	0.0035931	down	AT3G62630	Protein of unknown function (DUF1645)
Ghir_A11G030010	0.048385	0.870054	4.2418	0.0242956	up	AT3G06720	importin alpha isoform 1
Ghir_A11G030180	0.627989	0.0282293	-4.30433	0.0401185	down	AT5G55300	DNA topoisomerase I alpha
Ghir_A11G030360	0.13509	0.87218	2.76091	0.0173296	up	AT5G36930	Disease resistance protein (TIR-NBS-LRR class) family
Ghir_A11G030900	0.0335927	1.06325	5.01599	0.000136405	up	AT4G27220	NB-ARC domain-containing disease resistance protein
Ghir_A11G031540	0.764718	0.0944757	-2.94967	0.00602451	down	AT3G14840	Leucine-rich repeat transmembrane protein kinase
Ghir_A11G031840	0.675859	0.000785333	-9.09719	0.0064772	down	AT1G56070	Ribosomal protein S5/Elongation factor G/III/V family protein
Ghir_A11G032160	0.423929	7.65669	4.28993	3.31853e-11	up	AT1G09070	soybean gene regulated by cold-2
Ghir_A11G032330	0.609606	2.69533	2.22014	0.000107275	up	AT5G18150	Methyltransferase-related protein
Ghir_A11G032710	3.43736	8.45255	1.39521	0.0089008	up	AT3G03860	APR-like 5
Ghir_A11G032790	0.58822	3.67059	2.71937	0.00189903	up	AT1G72840	Disease resistance protein (TIR-NBS-LRR class)
Ghir_A11G033360	5.87738	39.2206	2.83831	0.00095391	up	AT3G56880	VQ motif-containing protein
Ghir_A11G033670	0.221333	3.5075	4.06397	7.76671e-06	up	AT3G50170	Plant protein of unknown function (DUF247)
Ghir_A11G033700	0.403691	2.10081	2.46024	0.000256367	up
Ghir_A11G033800	0.019317	1.36746	6.14254	0.000404738	up	AT5G04920	EAP30/Vps36 family protein
Ghir_A11G034170	0	2.48303	12.6496	6.36618e-07	up	AT2G42520	P-loop containing nucleoside triphosphate hydrolases superfamily protein
Ghir_A11G034770	0.582625	0	-24.3098	0.000494608	down	AT2G36350	Protein kinase superfamily protein
Ghir_A11G034860	0.938058	8.14285	3.19983	6.53953e-13	up	AT1G70000	myb-like transcription factor family protein
Ghir_A11G034990	16.3165	6.85318	-1.17184	0.0251104	down	AT5G03340	ATPase, AAA-type, CDC48 protein
Ghir_A11G035050	2.26799	5.63162	1.4164	0.0305551	up	AT3G09770	RING/U-box superfamily protein
Ghir_A11G035220	183.127	350.776	1.02566	0.000146651	up	AT5G02500	heat shock cognate protein 70-1
Ghir_A11G035490	0.0111977	0.114592	3.3565	0.00317154	up	AT2G38080	Laccase/Diphenol oxidase family protein
Ghir_A11G035500	24.2154	9.01252	-1.34918	0.000350012	down	AT2G38090	Duplicated homeodomain-like superfamily protein
Ghir_A11G035530	0	0.110747	7.34235	0.00381428	up	AT2G38320	TRICHOME BIREFRINGENCE-LIKE 34
Ghir_A11G036030	0	0.354131	7.78019	0.0114547	up
Ghir_A12G000100	2.79975	1.23638	-1.09662	0.0378222	down	AT1G53570	mitogen-activated protein kinase kinase kinase 3
Ghir_A12G000570	1.23592	6.01808	2.3839	1.70148e-05	up	AT3G63060	Eid1-like 3
Ghir_A12G000700	1.7989	3.46343	1.02332	0.020829	up	AT1G03440	Leucine-rich repeat (LRR) family protein
Ghir_A12G001420	0.190046	2.8475	3.96453	2.4202e-14	up	AT5G02600	Heavy metal transport/detoxification superfamily protein
Ghir_A12G001860	0.0145863	2.49894	7.20546	0.00145588	up	AT1G50020	unknown protein; FUNCTIONS IN: molecular_function unknown; INVOLVED IN: biological_process unknown; LOCATED IN: chloroplast thylakoid membrane, chloroplast; EXPRESSED IN: 24 plant structures; EXPRESSED DURING: 15 growth stages; Has 72 Blast hits to 72 proteins in 27 species: Archae - 0; Bacteria - 0; Metazoa - 0; Fungi - 0; Plants - 72; Viruses - 0; Other Eukaryotes - 0 (source: NCBI BLink).
Ghir_A12G001910	0.118677	0.590634	2.38539	0.00146412	up	AT1G49960	Xanthine/uracil permease family protein
Ghir_A12G002390	0.0418507	0.942927	4.55104	0.0119167	up	AT4G34410	redox responsive transcription factor 1
Ghir_A12G003030	0.0200023	0.322133	3.98599	0.0468772	up	AT2G16050	Cysteine/Histidine-rich C1 domain family protein
Ghir_A12G003490	0.914201	2.77651	1.71208	0.0277618	up	AT2G17040	NAC domain containing protein 36
Ghir_A12G003520	0.082507	3.38745	5.496	0.0193051	up	AT1G76160	SKU5 similar 5
Ghir_A12G004120	0.116383	0.667925	2.57323	4.55752e-05	up	AT4G34750	SAUR-like auxin-responsive protein family
Ghir_A12G004700	15.1404	7.13247	-1.01	0.00505484	down	AT2G34650	Protein kinase superfamily protein
Ghir_A12G005100	0.737596	2.61196	1.92515	0.00863953	up	AT4G20140	Leucine-rich repeat transmembrane protein kinase
Ghir_A12G005140	3.30798	7.31991	1.24404	0.039581	up	AT4G20170	Domain of unknown function (DUF23)
Ghir_A12G005230	0.22668	1.88639	3.13763	2.19894e-13	up	AT3G51550	Malectin/receptor-like protein kinase family protein
Ghir_A12G005530	0.0478873	0	-6.40047	0.00189903	down	AT5G38450	cytochrome P450, family 735, subfamily A, polypeptide 1
Ghir_A12G005560	0.711561	13.5061	4.34503	5.88632e-06	up	AT1G19020	unknown protein; BEST Arabidopsis thaliana protein match is: unknown protein (TAIR:AT3G48180.1); Has 88 Blast hits to 88 proteins in 15 species: Archae - 0; Bacteria - 0; Metazoa - 0; Fungi - 0; Plants - 88; Viruses - 0; Other Eukaryotes - 0 (source: NCBI BLink).
Ghir_A12G005780	0.0867493	1.43775	4.15492	0.000283003	up	AT5G37740	Calcium-dependent lipid-binding (CaLB domain) family protein
Ghir_A12G006040	2.1146	0.941384	-1.09292	0.0241594	down	AT5G66060	2-oxoglutarate (2OG) and Fe(II)-dependent oxygenase superfamily protein
Ghir_A12G006420	6.29528	2.13407	-1.47261	0.013467	down	AT5G66410	phosducin-like protein 3 homolog
Ghir_A12G006480	0.062762	0.7306	3.55249	0.00642078	up	AT4G36470	S-adenosyl-L-methionine-dependent methyltransferases superfamily protein
Ghir_A12G006740	5.79351	1.96667	-1.48758	0.00278595	down	AT4G36690	U2 snRNP auxilliary factor, large subunit, splicing factor
Ghir_A12G006870	3.89547	8.19652	1.14933	0.00363685	up	AT3G50770	calmodulin-like 41
Ghir_A12G007280	5.52424	17.8047	1.77104	6.79856e-05	up	AT4G37180	Homeodomain-like superfamily protein
Ghir_A12G007460	0.639954	0.0383303	-3.72322	0.00193223	down
Ghir_A12G007640	1.84322	4.31747	1.29769	0.000317263	up	AT5G67140	F-box/RNI-like superfamily protein
Ghir_A12G008760	1.69576	0.0203727	-6.16319	0.0173356	down	AT3G11220	Paxneb protein-related
Ghir_A12G008840	3.36336	0.789658	-1.99527	0.0390063	down	AT4G37750	Integrase-type DNA-binding superfamily protein
Ghir_A12G009000	0.00493033	0.546892	6.58048	0.00516788	up	AT4G37850	basic helix-loop-helix (bHLH) DNA-binding superfamily protein
Ghir_A12G009990	0.016254	2.59422	7.36615	1.34004e-07	up	AT4G39690	FUNCTIONS IN: molecular_function unknown; INVOLVED IN: biological_process unknown; LOCATED IN: mitochondrion; EXPRESSED IN: 26 plant structures; EXPRESSED DURING: 14 growth stages; CONTAINS InterPro DOMAIN/s: Mitochondrial inner membrane protein Mitofilin (InterPro:IPR019133); Has 30201 Blast hits to 17322 proteins in 780 species: Archae - 12; Bacteria - 1396; Metazoa - 17338; Fungi - 3422; Plant…
Ghir_A12G010530	0.0250403	1.62259	5.82572	0.0134317	up	AT5G51160	Ankyrin repeat family protein
Ghir_A12G010590	0.72788	0.242012	-1.50353	0.0012704	down	AT5G24910	cytochrome P450, family 714, subfamily A, polypeptide 1
Ghir_A12G011130	0.37837	1.54915	2.11271	0.000471639	up	AT1G01900	subtilase family protein
Ghir_A12G011290	0	1.14336	9.75678	0.0169209	up	AT2G45760	BON association protein 2
Ghir_A12G011600	1.42857	10.2168	2.87865	0.0415338	up	AT2G46080	CONTAINS InterPro DOMAIN/s: Protein BYPASS related (InterPro:IPR008511); BEST Arabidopsis thaliana protein match is: Protein of unknown function (DUF793) (TAIR:AT1G01550.2); Has 153 Blast hits to 139 proteins in 20 species: Archae - 0; Bacteria - 2; Metazoa - 1; Fungi - 0; Plants - 150; Viruses - 0; Other Eukaryotes - 0 (source: NCBI BLink).
Ghir_A12G011670	3.93334	90.1751	4.61744	1.87921e-11	up	AT3G61460	brassinosteroid-responsive RING-H2
Ghir_A12G012840	1.08944	2.82562	1.45858	1.48521e-08	up	AT2G46940	unknown protein; BEST Arabidopsis thaliana protein match is: unknown protein (TAIR:AT3G62070.1); Has 143 Blast hits to 141 proteins in 14 species: Archae - 0; Bacteria - 0; Metazoa - 4; Fungi - 0; Plants - 139; Viruses - 0; Other Eukaryotes - 0 (source: NCBI BLink).
Ghir_A12G012890	0.04291	2.25374	5.72836	2.23235e-07	up	AT3G62100	indole-3-acetic acid inducible 30
Ghir_A12G013700	1.45769	14.629	3.41593	0.0494036	up	AT5G38700	unknown protein; FUNCTIONS IN: molecular_function unknown; INVOLVED IN: biological_process unknown; LOCATED IN: mitochondrion; EXPRESSED IN: 10 plant structures; EXPRESSED DURING: LP.04 four leaves visible, LP.10 ten leaves visible, petal differentiation and expansion stage, LP.08 eight leaves visible, LP.12 twelve leaves visible; BEST Arabidopsis thaliana protein match is: unknown protein (TAIR:…
Ghir_A12G014030	9.3525	18.3521	1.05194	0.0393438	up	AT3G52860	unknown protein; Has 86 Blast hits to 86 proteins in 36 species: Archae - 0; Bacteria - 2; Metazoa - 41; Fungi - 13; Plants - 26; Viruses - 0; Other Eukaryotes - 4 (source: NCBI BLink).
Ghir_A12G014650	0.383622	16.3618	5.51572	3.59286e-06	up	AT4G27280	Calcium-binding EF-hand family protein
Ghir_A12G014710	5.80402	1.30803	-2.07371	0.0185191	down	AT4G28100	unknown protein; FUNCTIONS IN: molecular_function unknown; INVOLVED IN: biological_process unknown; LOCATED IN: anchored to plasma membrane, anchored to membrane; EXPRESSED IN: 23 plant structures; EXPRESSED DURING: 14 growth stages; BEST Arabidopsis thaliana protein match is: unknown protein (TAIR:AT3G18050.1); Has 30201 Blast hits to 17322 proteins in 780 species: Archae - 12; Bacteria - 1396; …
Ghir_A12G014900	0	0.154371	10.3821	0.00043144	up	AT2G14830	Regulator of Vps4 activity in the MVB pathway protein
Ghir_A12G014950	0.88641	4.0349	2.25949	1.79018e-06	up	AT4G32480	Protein of unknown function (DUF506)
Ghir_A12G015100	15.5223	1.0875	-3.76724	0.00317539	down	AT1G03870	FASCICLIN-like arabinoogalactan 9
Ghir_A12G015170	0.172934	0.0198233	-3.0288	0.00991711	down	AT5G13250	RING finger protein
Ghir_A12G015320	0.081317	2.82524	5.144	0.000212768	up	AT3G27810	myb domain protein 21
Ghir_A12G016110	6.5429	0.647747	-3.25929	2.9605e-08	down
Ghir_A12G017450	2.47008	12.0509	2.3678	4.70237e-05	up	AT5G15310	myb domain protein 16
Ghir_A12G018020	3.89268	17.723	2.29042	5.09332e-10	up	AT1G13280	allene oxide cyclase 4
Ghir_A12G018210	33.0886	15.3164	-1.05	0.0091251	down	AT1G26110	decapping 5
Ghir_A12G018280	12.6693	91.373	2.92268	0.000147743	up
Ghir_A12G018870	2.72413	0.0400663	-5.85024	0.014007	down	AT4G19840	phloem protein 2-A1
Ghir_A12G019220	0	0.485015	25.8952	0.000153742	up	AT5G07920	diacylglycerol kinase1
Ghir_A12G019570	0.216236	3.07282	3.89883	1.00565e-05	up	AT5G38790	unknown protein; BEST Arabidopsis thaliana protein match is: unknown protein (TAIR:AT3G30580.1); Has 1807 Blast hits to 1807 proteins in 277 species: Archae - 0; Bacteria - 0; Metazoa - 736; Fungi - 347; Plants - 385; Viruses - 0; Other Eukaryotes - 339 (source: NCBI BLink).
Ghir_A12G019630	4.3636	1.2457	-1.73324	0.0130155	down	AT5G23100	Protein of unknown function, DUF617
Ghir_A12G019820	0.0506423	1.26328	4.71311	1.22301e-08	up	AT2G31880	Leucine-rich repeat protein kinase family protein
Ghir_A12G019910	0.00215867	2.4869	8.85722	0.000274211	up	AT3G48425	DNAse I-like superfamily protein
Ghir_A12G019930	0.145373	0.646805	2.21775	0.000183313	up	AT3G48460	GDSL-like Lipase/Acylhydrolase superfamily protein
Ghir_A12G020070	0	0.435439	25.9052	0.000103043	up	AT5G50390	Pentatricopeptide repeat (PPR-like) superfamily protein
Ghir_A12G020190	0.300867	30.6586	6.76377	9.33805e-05	up	AT4G19570	Chaperone DnaJ-domain superfamily protein
Ghir_A12G020750	0.86083	3.84664	2.23633	3.69434e-07	up	AT5G51060	NADPH/respiratory burst oxidase protein D
Ghir_A12G020770	0.796297	4.08961	2.46194	0.0347925	up	AT1G02170	metacaspase 1
Ghir_A12G020820	0.570265	1.62071	1.57319	0.0281844	up	AT2G44740	cyclin p4;1
Ghir_A12G021080	2.52495	0.519553	-2.20042	0.0254072	down	AT5G51430	conserved oligomeric Golgi complex component-related / COG complex component-related
Ghir_A12G021090	11.0492	65.2292	2.6441	0.00733381	up	AT4G25200	mitochondrion-localized small heat shock protein 23.6
Ghir_A12G021380	0.0413787	0.62221	3.99	0.01592	up	AT4G19230	cytochrome P450, family 707, subfamily A, polypeptide 1
Ghir_A12G021400	0.306567	0.0325117	-3.11105	0.0298755	down	AT4G19220	Tetratricopeptide repeat (TPR)-like superfamily protein
Ghir_A12G021470	1.33224	0.21692	-2.51822	2.78531e-10	down	AT4G19170	nine-cis-epoxycarotenoid dioxygenase 4
Ghir_A12G021610	7.49437	19.7251	1.48133	3.01713e-05	up	AT5G45500	RNI-like superfamily protein
Ghir_A12G021640	7.38963	1.43575	-2.32601	0.0385733	down	AT5G45550	Mob1/phocein family protein
Ghir_A12G021710	1.02355	0.136883	-2.83507	0.00461114	down	AT1G32060	phosphoribulokinase
Ghir_A12G022760	0.620142	4.67267	3.00224	0.00268031	up	AT4G17500	ethylene responsive element binding factor 1
Ghir_A12G023210	4.66154	19.0537	2.11393	4.4126e-15	up	AT4G12440	adenine phosphoribosyl transferase 4
Ghir_A12G023580	0.028589	0.27169	3.20516	0.000357561	up	AT3G60890	protein binding
Ghir_A12G024020	1.18932	3.64036	1.69294	0.00747767	up	AT5G23750	Remorin family protein
Ghir_A12G024510	0.0213353	2.37977	6.92394	5.7781e-05	up	AT4G11280	1-aminocyclopropane-1-carboxylic acid (acc) synthase 6
Ghir_A12G024820	0.0582887	5.27869	6.59066	3.74107e-07	up	AT4G23810	WRKY family transcription factor
Ghir_A12G024950	0.0515823	0.636019	3.64552	0.0293328	up
Ghir_A12G025080	49.7076	214.367	2.1998	2.62279e-11	up	AT5G42050	DCD (Development and Cell Death) domain protein
Ghir_A12G025270	2.69877	7.41306	1.55317	0.000627986	up	AT4G24110	unknown protein; Has 76 Blast hits to 76 proteins in 13 species: Archae - 0; Bacteria - 0; Metazoa - 1; Fungi - 0; Plants - 75; Viruses - 0; Other Eukaryotes - 0 (source: NCBI BLink).
Ghir_A12G025400	2.59163	0.376962	-2.68112	6.55292e-08	down	AT1G01110	IQ-domain 18
Ghir_A12G025710	0.34454	1.32059	2.04096	0.0046821	up	AT1G33260	Protein kinase superfamily protein
Ghir_A12G025790	1.1423	0.358803	-1.59187	0.00309214	down	AT5G24600	Protein of unknown function, DUF599
Ghir_A12G026510	6.73471	23.8963	1.9209	6.29047e-06	up	AT1G64230	ubiquitin-conjugating enzyme 28
Ghir_A12G026750	0.254503	1.03873	2.12582	0.0377265	up	AT5G52830	WRKY DNA-binding protein 27
Ghir_A12G027650	0	0.00694367	22.5972	0.00167947	up	AT5G62190	DEAD box RNA helicase (PRH75)
Ghir_A12G027790	0.249234	3.36588	3.84177	0.0124749	up	AT1G49000	unknown protein; FUNCTIONS IN: molecular_function unknown; INVOLVED IN: biological_process unknown; LOCATED IN: chloroplast; EXPRESSED IN: stem; BEST Arabidopsis thaliana protein match is: unknown protein (TAIR:AT3G18560.1); Has 105 Blast hits to 105 proteins in 13 species: Archae - 0; Bacteria - 0; Metazoa - 0; Fungi - 0; Plants - 105; Viruses - 0; Other Eukaryotes - 0 (source: NCBI BLink).
Ghir_A12G028290	0.102743	1.26694	3.68478	1.64225e-06	up	AT1G18290	unknown protein; FUNCTIONS IN: molecular_function unknown; INVOLVED IN: N-terminal protein myristoylation; LOCATED IN: chloroplast; EXPRESSED IN: root; Has 94 Blast hits to 94 proteins in 12 species: Archae - 0; Bacteria - 0; Metazoa - 0; Fungi - 0; Plants - 94; Viruses - 0; Other Eukaryotes - 0 (source: NCBI BLink).
Ghir_A12G028530	0.00929833	0.06458	2.79242	0.0296402	up	AT1G73360	homeodomain GLABROUS 11
Ghir_A12G028800	0.006373	0.57168	6.41098	0.0248528	up	AT5G62960	unknown protein; BEST Arabidopsis thaliana protein match is: unknown protein (TAIR:AT1G10660.1); Has 35333 Blast hits to 34131 proteins in 2444 species: Archae - 798; Bacteria - 22429; Metazoa - 974; Fungi - 991; Plants - 531; Viruses - 0; Other Eukaryotes - 9610 (source: NCBI BLink).
Ghir_A13G000150	0.061438	2.8899	5.68076	0.00460304	up	AT1G73100	SU(VAR)3-9 homolog 3
Ghir_A13G000160	2.44021	4.74874	1.03418	0.024804	up	AT3G12390	Nascent polypeptide-associated complex (NAC), alpha subunit family protein
Ghir_A13G000530	0.423598	4.16934	3.41029	0.000142591	up
Ghir_A13G001010	0.120101	0	-7.49032	0.000557119	down	AT5G38260	Protein kinase superfamily protein
Ghir_A13G002060	18.0537	8.30097	-1.04393	0.000679524	down	AT5G13520	peptidase M1 family protein
Ghir_A13G002120	4.52964	1.91604	-1.16504	2.72714e-06	down	AT2G38970	Zinc finger (C3HC4-type RING finger) family protein
Ghir_A13G002320	6.52416	13.9012	1.17193	2.00278e-05	up	AT5G60670	Ribosomal protein L11 family protein
Ghir_A13G002560	0.310645	2.79884	3.29267	0.0226051	up	AT5G37490	ARM repeat superfamily protein
Ghir_A13G002650	26.9138	12.0012	-1.08305	0.0477573	down	AT2G01830	CHASE domain containing histidine kinase protein
Ghir_A13G002980	0.017219	0.0970447	2.55765	0.0259545	up	AT4G39110	Malectin/receptor-like protein kinase family protein
Ghir_A13G003000	1.32171	2.77176	1.13395	0.0184076	up	AT2G16385	unknown protein; FUNCTIONS IN: molecular_function unknown; INVOLVED IN: biological_process unknown; LOCATED IN: endomembrane system; BEST Arabidopsis thaliana protein match is: unknown protein (TAIR:AT4G34600.1); Has 35333 Blast hits to 34131 proteins in 2444 species: Archae - 798; Bacteria - 22429; Metazoa - 974; Fungi - 991; Plants - 531; Viruses - 0; Other Eukaryotes - 9610 (source: NCBI BLink…
Ghir_A13G003160	0.817662	0.123811	-2.68962	0.0438527	down	AT2G16250	Leucine-rich repeat protein kinase family protein
Ghir_A13G003690	0.00353467	0.105611	4.83683	0.019362	up	AT3G48690	alpha/beta-Hydrolases superfamily protein
Ghir_A13G003830	5.23903	0.433169	-3.5229	0.04363	down	AT3G19270	cytochrome P450, family 707, subfamily A, polypeptide 4
Ghir_A13G004090	0.233742	0.719471	1.70297	0.043492	up	AT2G15490	UDP-glycosyltransferase 73B4
Ghir_A13G004310	0.311798	3.26572	3.45922	1.10187e-25	up
Ghir_A13G004320	0.237206	1.20313	2.41115	0.00850538	up	AT4G33920	Protein phosphatase 2C family protein
Ghir_A13G004420	0.622151	4.54003	2.95498	0.00261592	up	AT1G27730	salt tolerance zinc finger
Ghir_A13G004550	0.0320017	0.532928	4.06957	0.0213109	up	AT4G33800	unknown protein; Has 30201 Blast hits to 17322 proteins in 780 species: Archae - 12; Bacteria - 1396; Metazoa - 17338; Fungi - 3422; Plants - 5037; Viruses - 0; Other Eukaryotes - 2996 (source: NCBI BLink).
Ghir_A13G005100	1.75891	5.2255	1.6485	0.0401466	up	AT3G17900	unknown protein; FUNCTIONS IN: molecular_function unknown; INVOLVED IN: biological_process unknown; LOCATED IN: cellular_component unknown; EXPRESSED IN: 23 plant structures; EXPRESSED DURING: 13 growth stages; Has 45 Blast hits to 44 proteins in 14 species: Archae - 0; Bacteria - 0; Metazoa - 2; Fungi - 2; Plants - 39; Viruses - 0; Other Eukaryotes - 2 (source: NCBI BLink).
Ghir_A13G006140	1.29481	0.140941	-3.04704	0.030967	down	AT5G08320	CONTAINS InterPro DOMAIN/s: E2F-associated phosphoprotein, C-terminal (InterPro:IPR019370); Has 149 Blast hits to 149 proteins in 78 species: Archae - 0; Bacteria - 0; Metazoa - 79; Fungi - 0; Plants - 35; Viruses - 0; Other Eukaryotes - 35 (source: NCBI BLink).
Ghir_A13G006180	0	0.0500103	8.11404	0.00772426	up	AT3G19960	myosin 1
Ghir_A13G006520	2.04895	5.68001	1.55255	0.0452457	up	AT2G17250	CCAAT-binding factor
Ghir_A13G006940	16.3597	4.31006	-1.85209	0.0116924	down	AT2G36690	2-oxoglutarate (2OG) and Fe(II)-dependent oxygenase superfamily protein
Ghir_A13G007350	0.196288	0.510053	1.45272	0.0466747	up	AT2G02870	Galactose oxidase/kelch repeat superfamily protein
Ghir_A13G007510	2.4661	0.636477	-1.88462	0.00308316	down	AT1G69600	zinc finger homeodomain 1
Ghir_A13G007580	0.67603	4.57504	2.79741	0.0272114	up	AT1G26800	RING/U-box superfamily protein
Ghir_A13G007770	0.0872127	4.70711	5.77578	1.28263e-06	up	AT5G15310	myb domain protein 16
Ghir_A13G007780	0	8.04449	13.311	2.7032e-11	up	AT5G15310	myb domain protein 16
Ghir_A13G008070	0.505234	2.19722	2.22069	2.28488e-05	up	AT1G13740	ABI five binding protein 2
Ghir_A13G008470	2.5988	1.18967	-1.04117	0.0292371	down	AT1G69360	Plant protein of unknown function (DUF863)
Ghir_A13G008480	0.0436107	0.376527	3.09726	0.0243868	up	AT2G03360	Glycosyltransferase family 61 protein
Ghir_A13G009400	1.2298	4.71013	2.01948	0.00472923	up	AT3G19950	RING/U-box superfamily protein
Ghir_A13G009560	0.948909	0.181188	-2.32871	0.00400211	down	AT3G45070	P-loop containing nucleoside triphosphate hydrolases superfamily protein
Ghir_A13G009600	0	0.769015	9.49343	0.0101591	up	AT3G02250	O-fucosyltransferase family protein
Ghir_A13G009890	0.624077	0.14654	-2.01498	0.024942	down	AT1G63840	RING/U-box superfamily protein
Ghir_A13G010320	0.0151457	0.405908	4.87672	0.000336103	up	AT1G08810	myb domain protein 60
Ghir_A13G010650	0.276632	2.70752	3.3845	0.0276273	up	AT5G18270	Arabidopsis NAC domain containing protein 87
Ghir_A13G010780	0.00664933	2.15597	8.30443	3.01922e-05	up	AT5G33370	GDSL-like Lipase/Acylhydrolase superfamily protein
Ghir_A13G011340	2.18958	16.2258	2.98674	2.34217e-17	up	AT1G55020	lipoxygenase 1
Ghir_A13G011860	0.473309	0	-25.1044	0.000279957	down	AT1G09300	Metallopeptidase M24 family protein
Ghir_A13G011970	8.66322	1.38719	-2.59656	0.0254967	down	AT1G69440	Argonaute family protein
Ghir_A13G013040	1.28944	11.0441	3.18755	2.48608e-05	up
Ghir_A13G013320	1.24007	0.240625	-2.28959	0.00182956	down	AT1G55620	chloride channel F
Ghir_A13G014060	0.623031	0.267573	-1.13594	0.000325613	down	AT5G55580	Mitochondrial transcription termination factor family protein
Ghir_A13G014180	0	0.0908847	7.07322	0.0437243	up	AT1G16240	syntaxin of plants 51
Ghir_A13G014360	0.0417123	1.99434	5.5886	3.95973e-10	up	AT4G26930	myb domain protein 97
Ghir_A13G014590	0	0.0845537	7.76111	0.0292769	up	AT4G26340	F-box/RNI-like/FBD-like domains-containing protein
Ghir_A13G014970	0.526914	21.1479	5.4925	0.00950842	up	AT4G27280	Calcium-binding EF-hand family protein
Ghir_A13G014980	0	5.48156	27.5497	4.07649e-05	up	AT1G11360	Adenine nucleotide alpha hydrolases-like superfamily protein
Ghir_A13G015120	0.00494033	0.182776	5.42437	0.0020391	up	AT3G15510	NAC domain containing protein 2
Ghir_A13G015190	6.89226	0.001059	-11.9652	0.000896279	down	AT3G15410	Leucine-rich repeat (LRR) family protein
Ghir_A13G015230	0.135651	3.89024	4.85064	1.07441e-11	up
Ghir_A13G015310	1.45653	5.21446	1.92577	1.88369e-07	up	AT5G53870	early nodulin-like protein 1
Ghir_A13G015990	0.229107	1.73571	3.00791	1.86007e-07	up	AT1G78440	Arabidopsis thaliana gibberellin 2-oxidase 1
Ghir_A13G016010	0.84361	2.66333	1.74311	0.000233699	up	AT3G14440	nine-cis-epoxycarotenoid dioxygenase 3
Ghir_A13G016230	0.288422	0	-24.6111	2.30302e-07	down	AT5G56270	WRKY DNA-binding protein 2
Ghir_A13G016270	2.12249	4.4424	1.14283	0.0276169	up	AT1G65295	unknown protein; LOCATED IN: endomembrane system; EXPRESSED IN: 22 plant structures; EXPRESSED DURING: 13 growth stages; BEST Arabidopsis thaliana protein match is: unknown protein (TAIR:AT5G01015.1); Has 90 Blast hits to 90 proteins in 15 species: Archae - 0; Bacteria - 0; Metazoa - 0; Fungi - 0; Plants - 90; Viruses - 0; Other Eukaryotes - 0 (source: NCBI BLink).
Ghir_A13G016280	6.64024	1.51574	-2.0661	0.0428594	down	AT1G65320	Cystathionine beta-synthase (CBS) family protein
Ghir_A13G016550	0.462467	0	-9.72272	0.00146609	down	AT5G16820	heat shock factor 3
Ghir_A13G017050	0.177144	0.64487	1.93638	0.000607839	up	AT1G08810	myb domain protein 60
Ghir_A13G017060	1.19993	4.01916	1.82027	3.19444e-07	up	AT3G45400	exostosin family protein
Ghir_A13G017690	0.017636	0.6604	5.31449	0.000155606	up	AT5G33370	GDSL-like Lipase/Acylhydrolase superfamily protein
Ghir_A13G018370	2.21822	5.08752	1.29783	0.00153883	up	AT1G64760	O-Glycosyl hydrolases family 17 protein
Ghir_A13G018540	0.0599793	0.471915	3.01684	0.00085045	up	AT3G05200	RING/U-box superfamily protein
Ghir_A13G018960	4.50304	1.69505	-1.32206	0.0420805	down	AT4G10710	global transcription factor C
Ghir_A13G019040	0.193844	0.599751	1.69694	0.00939842	up	AT3G05890	Low temperature and salt responsive protein family
Ghir_A13G019250	8.18393	2.24769	-1.78476	2.60481e-06	down	AT5G24930	CONSTANS-like 4
Ghir_A13G020580	0.415866	10.6998	4.76838	1.35238e-05	up	AT5G12010	unknown protein; INVOLVED IN: response to salt stress; LOCATED IN: chloroplast, plasma membrane, membrane; EXPRESSED IN: 23 plant structures; EXPRESSED DURING: 13 growth stages; BEST Arabidopsis thaliana protein match is: unknown protein (TAIR:AT4G29780.1); Has 1807 Blast hits to 1807 proteins in 277 species: Archae - 0; Bacteria - 0; Metazoa - 736; Fungi - 347; Plants - 385; Viruses - 0; Other E…
Ghir_A13G020770	4.00014	58.1674	3.90845	0.0353361	up	AT4G29190	Zinc finger C-x8-C-x5-C-x3-H type family protein
Ghir_A13G021010	0.00442633	0.621663	6.96021	3.86664e-18	up	AT2G26730	Leucine-rich repeat protein kinase family protein
Ghir_A13G021070	0.995001	0.238656	-1.96838	8.18521e-08	down	AT3G14470	NB-ARC domain-containing disease resistance protein
Ghir_A13G021140	3.91078	20.5661	2.48503	8.85395e-11	up	AT3G15630	unknown protein; FUNCTIONS IN: molecular_function unknown; INVOLVED IN: biological_process unknown; LOCATED IN: chloroplast; EXPRESSED IN: 24 plant structures; EXPRESSED DURING: 15 growth stages; BEST Arabidopsis thaliana protein match is: unknown protein (TAIR:AT1G52720.1); Has 61 Blast hits to 61 proteins in 13 species: Archae - 0; Bacteria - 0; Metazoa - 0; Fungi - 0; Plants - 61; Viruses - 0;…
Ghir_A13G021270	14.9822	53.0816	1.92057	0.000121557	up	AT5G20230	blue-copper-binding protein
Ghir_A13G021630	1.03132	10.7825	3.48903	1.8391e-07	up	AT5G35110	unknown protein; BEST Arabidopsis thaliana protein match is: unknown protein (TAIR:AT2G46490.1); Has 1807 Blast hits to 1807 proteins in 277 species: Archae - 0; Bacteria - 0; Metazoa - 736; Fungi - 347; Plants - 385; Viruses - 0; Other Eukaryotes - 339 (source: NCBI BLink).
Ghir_A13G021640	0.105312	2.48581	4.62367	0.00871947	up	AT2G46490	unknown protein; BEST Arabidopsis thaliana protein match is: unknown protein (TAIR:AT5G35110.1); Has 34 Blast hits to 34 proteins in 7 species: Archae - 0; Bacteria - 0; Metazoa - 1; Fungi - 0; Plants - 33; Viruses - 0; Other Eukaryotes - 0 (source: NCBI BLink).
Ghir_A13G021670	0.0213403	1.56985	6.19457	0.0346305	up	AT4G32620	Enhancer of polycomb-like transcription factor protein
Ghir_A13G021960	0.793889	3.93595	2.39201	3.31492e-17	up	AT5G57800	Fatty acid hydroxylase superfamily
Ghir_A13G022890	0	0.00463867	24.6383	0.000460925	up	AT5G12870	myb domain protein 46
Ghir_A13G022920	15.8507	7.32217	-1.03178	2.67237e-05	down	AT5G04590	sulfite reductase
Ghir_A13G023550	0	0.444731	25.8216	1.38909e-09	up	AT3G44460	Basic-leucine zipper (bZIP) transcription factor family protein
Ghir_A13G024170	0.074882	3.243	5.48612	0.00354949	up	AT2G28710	C2H2-type zinc finger family protein
Ghir_A13G024340	1.11295	3.18547	1.60354	0.000225113	up	AT5G60680	Protein of unknown function, DUF584
Ghir_A13G024610	0.02211	0.804519	5.21669	0.00364085	up	AT2G30020	Protein phosphatase 2C family protein
Ghir_A13G024660	3.10566	6.16126	1.07886	0.0250754	up	AT5G58575	CONTAINS InterPro DOMAIN/s: Sgf11, transcriptional regulation (InterPro:IPR013246); Has 30201 Blast hits to 17322 proteins in 780 species: Archae - 12; Bacteria - 1396; Metazoa - 17338; Fungi - 3422; Plants - 5037; Viruses - 0; Other Eukaryotes - 2996 (source: NCBI BLink).
Ghir_A13G024720	1.00296	4.64161	2.31899	0.000112195	up	AT1G16030	heat shock protein 70B
Ghir_D01G000500	0.431623	2.18344	2.41576	5.47355e-05	up	AT2G16280	3-ketoacyl-CoA synthase 9
Ghir_D01G000780	7.49314	16.5004	1.21522	0.00623477	up	AT2G09990	Ribosomal protein S5 domain 2-like superfamily protein
Ghir_D01G001410	14.0728	1.81151	-2.84535	0.00190888	down	AT4G38130	histone deacetylase 1
Ghir_D01G001650	12.831	28.8415	1.23809	0.0481413	up	AT4G28240	Wound-responsive family protein
Ghir_D01G001700	0.112509	1.20936	3.50539	0.00212207	up	AT4G03400	Auxin-responsive GH3 family protein
Ghir_D01G001940	29.0398	0.0720823	-8.59796	0.00174978	down	AT2G20580	26S proteasome regulatory subunit S2 1A
Ghir_D01G001960	1.00068	4.94226	2.40576	5.66646e-06	up	AT2G20562	unknown protein; LOCATED IN: endomembrane system; BEST Arabidopsis thaliana protein match is: unknown protein (TAIR:AT2G31090.1); Has 70 Blast hits to 70 proteins in 13 species: Archae - 0; Bacteria - 0; Metazoa - 0; Fungi - 0; Plants - 70; Viruses - 0; Other Eukaryotes - 0 (source: NCBI BLink).
Ghir_D01G002220	0.044049	0.301924	2.69966	0.0129969	up
Ghir_D01G002480	0.0404503	0	-6.6283	0.00391425	down	AT4G14368	Regulator of chromosome condensation (RCC1) family protein
Ghir_D01G002580	1.01567	0.3944	-1.29243	0.0392966	down	AT5G18910	Protein kinase superfamily protein
Ghir_D01G003610	0.093961	2.16052	4.62681	1.38464e-09	up	AT3G14440	nine-cis-epoxycarotenoid dioxygenase 3
Ghir_D01G003710	18.6104	8.1797	-1.11646	0.000347697	down	AT1G78430	ROP interactive partner 2
Ghir_D01G003730	0	0.302228	8.42834	0.00312349	up	AT5G64770	Encodes a root meristem growth factor (RGF). Belongs to a family of functionally redundant homologous peptides that are secreted, tyrosine-sulfated, and expressed mainly in the stem cell area and the innermost layer of central columella cells. RGFs are required for maintenance of the root stem cell niche and transit amplifying cell proliferation. Members of this family include: At5g60810 (RGF1), …
Ghir_D01G003820	0	0.158587	6.99475	0.000162626	up
Ghir_D01G003950	0.072131	0	-6.89615	0.0195644	down	AT3G14690	cytochrome P450, family 72, subfamily A, polypeptide 15
Ghir_D01G004480	5.45836	1.01215	-2.34425	4.19226e-09	down	AT1G16970	KU70 homolog
Ghir_D01G004520	1.63666	0.37465	-2.05033	0.0422123	down	AT1G29800	RING/FYVE/PHD-type zinc finger family protein
Ghir_D01G004840	0.0537777	1.33507	4.60034	1.94674e-07	up	AT2G42610	Protein of unknown function (DUF640)
Ghir_D01G005430	23.6497	140.968	2.67158	4.68966e-09	up	AT3G15210	ethylene responsive element binding factor 4
Ghir_D01G005860	1.35138	0.107803	-3.55116	0.0298755	down	AT4G36220	ferulic acid 5-hydroxylase 1
Ghir_D01G006050	0.560184	2.74107	2.36297	0.00144256	up	AT4G27410	NAC (No Apical Meristem) domain transcriptional regulator superfamily protein
Ghir_D01G006060	0.549275	1.95822	1.90212	0.000795609	up	AT3G15510	NAC domain containing protein 2
Ghir_D01G006070	0.544021	3.98756	2.96784	9.73321e-10	up	AT3G15518	unknown protein; FUNCTIONS IN: molecular_function unknown; INVOLVED IN: biological_process unknown; LOCATED IN: cellular_component unknown; Has 30201 Blast hits to 17322 proteins in 780 species: Archae - 12; Bacteria - 1396; Metazoa - 17338; Fungi - 3422; Plants - 5037; Viruses - 0; Other Eukaryotes - 2996 (source: NCBI BLink).
Ghir_D01G006100	1.62138	7.39917	2.28588	3.42968e-12	up	AT5G54400	S-adenosyl-L-methionine-dependent methyltransferases superfamily protein
Ghir_D01G006140	0	1.59127	10.5029	2.49632e-13	up	AT1G52855	unknown protein; BEST Arabidopsis thaliana protein match is: unknown protein (TAIR:AT3G15534.1); Has 35333 Blast hits to 34131 proteins in 2444 species: Archae - 798; Bacteria - 22429; Metazoa - 974; Fungi - 991; Plants - 531; Viruses - 0; Other Eukaryotes - 9610 (source: NCBI BLink).
Ghir_D01G006370	1.45627	9.18072	2.75411	1.41503e-06	up	AT4G10270	Wound-responsive family protein
Ghir_D01G006500	1.88143	34.3258	4.27978	1.36572e-08	up	AT4G27280	Calcium-binding EF-hand family protein
Ghir_D01G006680	1.885	15.3925	3.14565	8.32981e-06	up	AT5G48150	GRAS family transcription factor
Ghir_D01G006790	26.4132	12.0769	-1.05053	0.00407697	down	AT5G54680	basic helix-loop-helix (bHLH) DNA-binding superfamily protein
Ghir_D01G006960	0.279753	0.052628	-2.27268	0.00295548	down	AT3G20580	COBRA-like protein 10 precursor
Ghir_D01G007100	1.40507	5.54708	2.05606	5.01818e-09	up	AT5G54840	Ras-related small GTP-binding family protein
Ghir_D01G007550	0.92213	0.208491	-2.01842	9.13891e-06	down	AT5G55050	GDSL-like Lipase/Acylhydrolase superfamily protein
Ghir_D01G007770	0.00544967	0.729803	6.86034	0.0071513	up	AT5G55180	O-Glycosyl hydrolases family 17 protein
Ghir_D01G007790	9.72168	31.5325	1.79253	0.00733957	up	AT1G50640	ethylene responsive element binding factor 3
Ghir_D01G008330	0.00469833	1.61569	8.13999	5.37922e-05	up	AT3G13110	serine acetyltransferase 2;2
Ghir_D01G008490	0.490527	1.68713	1.84468	0.0343714	up	AT4G14540	nuclear factor Y, subunit B3
Ghir_D01G008590	0.129923	0	-27.3975	4.5374e-06	down	AT3G13180	NOL1/NOP2/sun family protein / antitermination NusB domain-containing protein
Ghir_D01G008890	1.55858	0.0327757	-5.36727	0.0429963	down	AT1G62390	Octicosapeptide/Phox/Bem1p (PB1) domain-containing protein / tetratricopeptide repeat (TPR)-containing protein
Ghir_D01G009070	0.764674	0.317069	-1.17946	0.000329264	down	AT2G30070	potassium transporter 1
Ghir_D01G009450	0.105005	0	-7.64362	0.0388577	down	AT4G00231	ARM repeat superfamily protein
Ghir_D01G010220	0	0.773731	26.5464	9.31507e-05	up	AT1G76270	O-fucosyltransferase family protein
Ghir_D01G010260	0.00748233	0.094031	3.93904	0.00683603	up	AT1G76240	Arabidopsis protein of unknown function (DUF241)
Ghir_D01G010530	1.41643	0.0801437	-4.07238	0.0221801	down	AT1G76010	Alba DNA/RNA-binding protein
Ghir_D01G010590	3.45634	29.618	3.19714	1.65078e-15	up	AT1G20100	unknown protein; BEST Arabidopsis thaliana protein match is: unknown protein (TAIR:AT1G75860.1); Has 471 Blast hits to 438 proteins in 92 species: Archae - 0; Bacteria - 14; Metazoa - 217; Fungi - 43; Plants - 91; Viruses - 1; Other Eukaryotes - 105 (source: NCBI BLink).
Ghir_D01G010600	0.510187	16.2017	5.06785	2.09527e-05	up	AT4G35030	Protein kinase superfamily protein
Ghir_D01G010790	0.691096	1.7706	1.44539	0.00557937	up	AT1G75580	SAUR-like auxin-responsive protein family
Ghir_D01G010880	0.317502	7.1079	4.55501	2.533e-18	up	AT1G62280	SLAC1 homologue 1
Ghir_D01G010920	0.461216	2.13227	2.30217	1.76016e-16	up	AT1G19900	glyoxal oxidase-related protein
Ghir_D01G011050	1.03035	4.69972	2.24103	0.00507683	up	ATCG00440	NADH:ubiquinone/plastoquinone oxidoreductase, chain 3 protein
Ghir_D01G011150	0.070742	1.0538	3.84266	0.000680609	up	ATCG00500	acetyl-CoA carboxylase carboxyl transferase subunit beta
Ghir_D01G011230	2.54602	5.11053	1.08471	0.0051963	up	AT1G75280	NmrA-like negative transcriptional regulator family protein
Ghir_D01G011730	0.00810467	0.112617	3.71557	0.0474198	up	AT5G58030	Transport protein particle (TRAPP) component
Ghir_D01G011810	1.43505	25.7298	4.25173	0.000779726	up	AT1G27730	salt tolerance zinc finger
Ghir_D01G012450	0.0487177	0.241545	2.38352	0.00689225	up	AT4G24510	HXXXD-type acyl-transferase family protein
Ghir_D01G012950	10.3492	4.12948	-1.24303	0.0065307	down	AT3G52170	DNA binding
Ghir_D01G013500	3.52927	7.87584	1.2299	0.0151463	up	AT5G03850	Nucleic acid-binding, OB-fold-like protein
Ghir_D01G013550	0	4.15127	10.52	0.00448493	up
Ghir_D01G013730	0	0.195358	7.99408	2.52759e-06	up	AT3G12120	fatty acid desaturase 2
Ghir_D01G014480	0	0.512532	29.7882	6.18416e-06	up	AT4G15090	FRS (FAR1 Related Sequences) transcription factor family
Ghir_D01G014790	4.06525	24.1602	2.64501	0.00110915	up	AT1G14700	purple acid phosphatase 3
Ghir_D01G014900	0.195004	1.83055	3.31678	0.00542367	up
Ghir_D01G015150	0.130415	1.27146	3.37023	0.00747767	up	AT3G19850	Phototropic-responsive NPH3 family protein
Ghir_D01G015310	0.14915	1.21454	3.06853	0.012038	up	AT1G67920	unknown protein; BEST Arabidopsis thaliana protein match is: unknown protein (TAIR:AT1G24600.1); Has 22 Blast hits to 22 proteins in 5 species: Archae - 0; Bacteria - 0; Metazoa - 0; Fungi - 0; Plants - 22; Viruses - 0; Other Eukaryotes - 0 (source: NCBI BLink).
Ghir_D01G015320	0.008535	1.01973	6.92602	0.00945247	up	AT1G14860	nudix hydrolase homolog 18
Ghir_D01G015920	1.98483	0.358586	-2.38048	0.0140359	down	AT1G23030	ARM repeat superfamily protein
Ghir_D01G016160	24.0732	50.5243	1.14683	0.00832423	up	AT1G27950	glycosylphosphatidylinositol-anchored lipid protein transfer 1
Ghir_D01G016500	65.0304	5.84281	-3.40279	9.67137e-05	down	AT1G23420	Plant-specific transcription factor YABBY family protein
Ghir_D01G016940	1.03486	0.003073	-7.98203	0.0275035	down	AT1G27880	DEAD/DEAH box RNA helicase family protein
Ghir_D01G017110	0	0.0520323	8.23056	0.0434792	up	AT4G30150	CONTAINS InterPro DOMAIN/s: Nucleolar 27S pre-rRNA processing, Urb2/Npa2 (InterPro:IPR018849); Has 58 Blast hits to 49 proteins in 21 species: Archae - 0; Bacteria - 2; Metazoa - 2; Fungi - 0; Plants - 44; Viruses - 3; Other Eukaryotes - 7 (source: NCBI BLink).
Ghir_D01G017250	0	0.0557597	6.68129	0.00608407	up	AT4G34880	Amidase family protein
Ghir_D01G017630	0.671778	0.169639	-1.91716	0.00136953	down	AT2G16750	Protein kinase protein with adenine nucleotide alpha hydrolases-like domain
Ghir_D01G018800	0	3.16106	40.0957	4.12154e-51	up	AT1G50110	D-aminoacid aminotransferase-like PLP-dependent enzymes superfamily protein
Ghir_D01G019540	13.0173	4.44229	-1.48007	0.00700461	down	AT3G56940	dicarboxylate diiron protein, putative (Crd1)
Ghir_D01G019830	5.51683	14.2868	1.45487	1.7153e-05	up	AT1G21750	PDI-like 1-1
Ghir_D01G020040	13.9429	6.12473	-1.11989	0.0020575	down	AT1G36730	Translation initiation factor IF2/IF5
Ghir_D01G020120	29.3106	89.2165	1.68679	6.26097e-08	up	AT2G41010	calmodulin (CAM)-binding protein of 25 kDa
Ghir_D01G020150	0	0.001123	17.5486	5.63669e-07	up	AT5G04140	glutamate synthase 1
Ghir_D01G020180	2.33241	6.34868	1.53238	0.00028548	up	AT2G41410	Calcium-binding EF-hand family protein
Ghir_D01G020340	5.90699	1.12435	-2.32531	0.00624975	down	AT2G42250	cytochrome P450, family 712, subfamily A, polypeptide 1
Ghir_D01G020350	0.0467377	0.312642	2.78385	0.00137562	up	AT2G42280	basic helix-loop-helix (bHLH) DNA-binding superfamily protein
Ghir_D01G020940	0.0650387	3.66266	5.84647	0.00371711	up	AT2G35930	plant U-box 23
Ghir_D01G021030	1.11724	2.87514	1.44392	6.59783e-05	up	AT3G11660	NDR1/HIN1-like 1
Ghir_D01G021050	0.280231	1.60967	2.58001	0.00437347	up	AT3G52500	Eukaryotic aspartyl protease family protein
Ghir_D01G021120	1.13231	3.89957	1.85795	5.43614e-10	up	AT3G11600	unknown protein; FUNCTIONS IN: molecular_function unknown; INVOLVED IN: response to karrikin; EXPRESSED IN: 21 plant structures; EXPRESSED DURING: 12 growth stages; BEST Arabidopsis thaliana protein match is: unknown protein (TAIR:AT5G06270.1); Has 171 Blast hits to 171 proteins in 15 species: Archae - 0; Bacteria - 0; Metazoa - 0; Fungi - 0; Plants - 171; Viruses - 0; Other Eukaryotes - 0 (sourc…
Ghir_D01G021230	0.580308	0.00885833	-5.85	0.00705115	down	AT3G11540	Tetratricopeptide repeat (TPR)-like superfamily protein
Ghir_D01G021440	1.8255	4.51737	1.39796	0.01592	up	AT3G52730	ubiquinol-cytochrome C reductase UQCRX/QCR9-like family protein
Ghir_D01G021580	35.4583	68.6817	1.02967	0.0329822	up	AT3G44590	60S acidic ribosomal protein family
Ghir_D01G021660	5.26945	1.86205	-1.42618	0.000959455	down	AT5G03680	Duplicated homeodomain-like superfamily protein
Ghir_D01G021680	0.224657	7.92367	5.22915	3.56569e-25	up	AT2G27770	Plant protein of unknown function (DUF868)
Ghir_D01G021760	0.555553	1.46557	1.47402	0.00387669	up	AT5G03760	Nucleotide-diphospho-sugar transferases superfamily protein
Ghir_D01G022180	1.12068	0	-30.7168	2.61751e-06	down	AT2G36960	TSL-kinase interacting protein 1
Ghir_D01G022380	0	0.177416	6.87465	0.00022405	up	AT5G03120	unknown protein; FUNCTIONS IN: molecular_function unknown; INVOLVED IN: biological_process unknown; LOCATED IN: endomembrane system; EXPRESSED IN: 21 plant structures; EXPRESSED DURING: 13 growth stages; Has 14 Blast hits to 14 proteins in 4 species: Archae - 0; Bacteria - 0; Metazoa - 0; Fungi - 0; Plants - 14; Viruses - 0; Other Eukaryotes - 0 (source: NCBI BLink).
Ghir_D01G023140	0.976257	3.90416	2.07353	2.52399e-11	up	AT3G53750	actin 3
Ghir_D01G023150	0.00792633	1.76025	7.46435	0.000612006	up	AT5G02420	unknown protein; Has 90 Blast hits to 90 proteins in 10 species: Archae - 0; Bacteria - 0; Metazoa - 0; Fungi - 0; Plants - 90; Viruses - 0; Other Eukaryotes - 0 (source: NCBI BLink).
Ghir_D01G023260	0.408923	5.76457	3.92027	0.023667	up	AT3G54040	PAR1 protein
Ghir_D01G023440	0.0540957	0.258921	2.36648	0.0354742	up	AT5G48380	BAK1-interacting receptor-like kinase 1
Ghir_D01G023730	8.09937	1.69717	-2.17055	0.0201349	down	AT3G08940	light harvesting complex photosystem II
Ghir_D01G023800	2.98452	5.71145	1.01537	5.2942e-06	up	AT3G51790	transmembrane protein G1P-related 1
Ghir_D02G002160	1.49123	7.10474	2.37182	0.00250005	up	AT4G14130	xyloglucan endotransglucosylase/hydrolase 15
Ghir_D02G002250	0.0420037	0	-7.02274	0.0052524	down	AT1G47890	receptor like protein 7
Ghir_D02G002540	0	0.0782743	5.8254	0.00082063	up	AT1G26800	RING/U-box superfamily protein
Ghir_D02G002890	0.120017	0.765233	2.75058	0.0398311	up	AT3G14640	cytochrome P450, family 72, subfamily A, polypeptide 10
Ghir_D02G003560	6.70062	2.34636	-1.43958	0.0287827	down	AT1G03130	photosystem I subunit D-2
Ghir_D02G003590	1.74402	0.724219	-1.20136	0.00944977	down	AT1G05370	Sec14p-like phosphatidylinositol transfer family protein
Ghir_D02G004220	0.726511	4.56812	2.74093	1.85133e-05	up	AT4G14450	unknown protein; LOCATED IN: chloroplast; BEST Arabidopsis thaliana protein match is: unknown protein (TAIR:AT3G23170.1); Has 74 Blast hits to 74 proteins in 6 species: Archae - 0; Bacteria - 0; Metazoa - 0; Fungi - 0; Plants - 74; Viruses - 0; Other Eukaryotes - 0 (source: NCBI BLink).
Ghir_D02G004280	0.597425	4.27405	2.91709	0.0152464	up	AT4G08300	nodulin MtN21 /EamA-like transporter family protein
Ghir_D02G004330	0.426248	2.3965	2.54174	0.00164595	up	AT3G22142	Bifunctional inhibitor/lipid-transfer protein/seed storage 2S albumin superfamily protein
Ghir_D02G004720	1.5766	3.56917	1.27563	0.00255951	up	AT4G21865	unknown protein; Has 11 Blast hits to 11 proteins in 4 species: Archae - 0; Bacteria - 0; Metazoa - 0; Fungi - 0; Plants - 11; Viruses - 0; Other Eukaryotes - 0 (source: NCBI BLink).
Ghir_D02G004870	61.4366	224.621	1.95078	0.0156902	up	AT4G13520	small acidic protein 1
Ghir_D02G005300	2.99821	8.52457	1.5836	0.000191099	up	AT4G15800	ralf-like 33
Ghir_D02G005510	0.338446	0.044781	-2.8487	0.0486085	down	AT3G05640	Protein phosphatase 2C family protein
Ghir_D02G005670	9.41291	28.1063	1.67273	0.000993525	up	AT4G16120	COBRA-like protein-7 precursor
Ghir_D02G005910	0.072197	1.25198	4.13129	0.0181386	up	AT3G15740	RING/U-box superfamily protein
Ghir_D02G006290	25.682	87.9661	1.87044	2.04268e-07	up	AT3G17390	S-adenosylmethionine synthetase family protein
Ghir_D02G006640	1.19675	14.3841	3.6858	0.00491944	up	AT1G22690	Gibberellin-regulated family protein
Ghir_D02G007020	0.012081	0.532676	5.59452	0.00480027	up	AT5G61890	Integrase-type DNA-binding superfamily protein
Ghir_D02G007070	0.0703867	2.1185	5.03831	0.0282245	up	AT1G18740	Protein of unknown function (DUF793)
Ghir_D02G007240	0.561847	3.46322	2.68881	0.0056654	up	AT3G18710	plant U-box 29
Ghir_D02G007460	9.36349	3.48351	-1.35828	0.0478294	down	AT1G21460	Nodulin MtN3 family protein
Ghir_D02G007570	0.0130897	0.411989	4.88432	8.72994e-07	up	AT1G31130	unknown protein; FUNCTIONS IN: molecular_function unknown; INVOLVED IN: biological_process unknown; LOCATED IN: cellular_component unknown; EXPRESSED IN: 23 plant structures; EXPRESSED DURING: 13 growth stages; BEST Arabidopsis thaliana protein match is: unknown protein (TAIR:AT4G19950.1); Has 246 Blast hits to 244 proteins in 29 species: Archae - 2; Bacteria - 16; Metazoa - 0; Fungi - 0; Plants …
Ghir_D02G007700	2.11991	0.709269	-1.50778	0.00080608	down	AT1G44000	unknown protein; BEST Arabidopsis thaliana protein match is: unknown protein (TAIR:AT4G11911.1); Has 216 Blast hits to 212 proteins in 76 species: Archae - 0; Bacteria - 96; Metazoa - 0; Fungi - 0; Plants - 118; Viruses - 0; Other Eukaryotes - 2 (source: NCBI BLink).
Ghir_D02G007760	0	0.734144	10.8663	5.94767e-05	up	AT1G21230	wall associated kinase 5
Ghir_D02G008050	1.16095	11.6808	3.4181	0.000659238	up	AT1G01720	NAC (No Apical Meristem) domain transcriptional regulator superfamily protein
Ghir_D02G008100	0.00430633	0.242903	5.92565	0.0310051	up	AT1G21750	PDI-like 1-1
Ghir_D02G008190	8.0471	2.25009	-1.777	0.0258034	down	AT4G08300	nodulin MtN21 /EamA-like transporter family protein
Ghir_D02G008230	4.23137	8.14238	1.01928	0.034557	up	AT4G08230	glycine-rich protein
Ghir_D02G008370	0.80557	7.76422	3.34823	6.10118e-09	up	AT1G22030	CONTAINS InterPro DOMAIN/s: Protein BYPASS related (InterPro:IPR008511); BEST Arabidopsis thaliana protein match is: unknown protein (TAIR:AT1G77855.1); Has 99 Blast hits to 99 proteins in 17 species: Archae - 0; Bacteria - 0; Metazoa - 3; Fungi - 0; Plants - 96; Viruses - 0; Other Eukaryotes - 0 (source: NCBI BLink).
Ghir_D02G008400	0.003209	0.0849743	4.72976	0.00306	up	AT1G22060	LOCATED IN: vacuole; EXPRESSED IN: 23 plant structures; EXPRESSED DURING: 13 growth stages; BEST Arabidopsis thaliana protein match is: FBD, F-box and Leucine Rich Repeat domains containing protein (TAIR:AT1G22000.1); Has 84739 Blast hits to 38714 proteins in 2257 species: Archae - 1436; Bacteria - 11314; Metazoa - 40747; Fungi - 7706; Plants - 4675; Viruses - 308; Other Eukaryotes - 18553 (sourc…
Ghir_D02G008460	1.22994	5.49814	2.2521	0.0448072	up	AT1G78080	related to AP2 4
Ghir_D02G008510	7.44518	35.14	2.33779	0.00161191	up	AT4G08950	Phosphate-responsive 1 family protein
Ghir_D02G008520	0.041815	6.89115	7.47569	0.000413592	up	AT1G78290	Protein kinase superfamily protein
Ghir_D02G008830	6.6678	2.58621	-1.2926	0.0125319	down	AT4G14960	Tubulin/FtsZ family protein
Ghir_D02G009080	1.03473	9.54189	3.28325	0.00926838	up	AT1G27700	Syntaxin/t-SNARE family protein
Ghir_D02G009470	0.737983	4.67151	2.75281	0.000500466	up	AT5G42680	Protein of unknown function, DUF617
Ghir_D02G010100	2.9781	1.00373	-1.47374	0.0173729	down	AT1G20080	Calcium-dependent lipid-binding (CaLB domain) family protein
Ghir_D02G010160	2.5186	5.33191	1.16148	0.0292371	up	AT1G20460	unknown protein; BEST Arabidopsis thaliana protein match is: unknown protein (TAIR:AT1G76185.1); Has 37 Blast hits to 37 proteins in 11 species: Archae - 0; Bacteria - 0; Metazoa - 0; Fungi - 0; Plants - 37; Viruses - 0; Other Eukaryotes - 0 (source: NCBI BLink).
Ghir_D02G010830	3.41874	0.436488	-2.89479	0.00799352	down	AT4G20930	6-phosphogluconate dehydrogenase family protein
Ghir_D02G010890	5.19918	2.1994	-1.16429	3.7018e-05	down	AT1G44900	minichromosome maintenance (MCM2/3/5) family protein
Ghir_D02G011880	0	0.046687	5.93527	0.00741925	up	AT4G39670	Glycolipid transfer protein (GLTP) family protein
Ghir_D02G011890	1.58973	3.14521	1.08998	0.0430869	up	AT1G13340	Regulator of Vps4 activity in the MVB pathway protein
Ghir_D02G012090	5.2086	21.4078	2.12248	3.43192e-08	up	AT1G70370	polygalacturonase 2
Ghir_D02G012120	2.49365	75.7339	5.00797	0.031549	up
Ghir_D02G012250	4.13425	8.87118	1.17806	0.00817928	up	AT5G58210	hydroxyproline-rich glycoprotein family protein
Ghir_D02G012430	4.81932	53.8054	3.58506	0.00708214	up	AT1G18300	nudix hydrolase homolog 4
Ghir_D02G012880	12.5913	1.41855	-3.07906	1.5557e-06	down	AT1G14290	sphingoid base hydroxylase 2
Ghir_D02G012890	2.32891	0.548598	-2.00861	0.00570492	down	AT1G14290	sphingoid base hydroxylase 2
Ghir_D02G012950	0.623917	4.2363	2.87213	0.00537814	up	AT2G02960	RING/FYVE/PHD zinc finger superfamily protein
Ghir_D02G013090	0.217262	0	-22.8358	8.49555e-08	down	AT1G69430	unknown protein; BEST Arabidopsis thaliana protein match is: unknown protein (TAIR:AT1G26650.1); Has 216 Blast hits to 215 proteins in 17 species: Archae - 0; Bacteria - 0; Metazoa - 0; Fungi - 0; Plants - 216; Viruses - 0; Other Eukaryotes - 0 (source: NCBI BLink).
Ghir_D02G013380	1.67181	5.54016	1.7992	0.0281844	up	AT1G26340	cytochrome B5 isoform A
Ghir_D02G013400	3.71655	0.33984	-3.39437	0.00451516	down	AT1G69180	Plant-specific transcription factor YABBY family protein
Ghir_D02G013690	0.361384	1.62989	2.25159	0.00115083	up	AT3G21680	unknown protein; FUNCTIONS IN: molecular_function unknown; INVOLVED IN: N-terminal protein myristoylation; LOCATED IN: cellular_component unknown; EXPRESSED IN: root, flower, stamen; EXPRESSED DURING: 4 anthesis, petal differentiation and expansion stage; Has 34 Blast hits to 34 proteins in 7 species: Archae - 0; Bacteria - 0; Metazoa - 0; Fungi - 0; Plants - 34; Viruses - 0; Other Eukaryotes - 0…
Ghir_D02G013790	0.306986	0.125389	-1.18894	0.0358763	down	AT3G21720	isocitrate lyase
Ghir_D02G014120	3.57469	8.69454	1.38163	0.0221495	up	AT1G14720	xyloglucan endotransglucosylase/hydrolase 28
Ghir_D02G014230	0.291013	1.24705	2.18194	1.318e-05	up	AT2G01940	C2H2-like zinc finger protein
Ghir_D02G014580	1.50754	4.44997	1.62799	1.7504e-07	up	AT1G03400	2-oxoglutarate (2OG) and Fe(II)-dependent oxygenase superfamily protein
Ghir_D02G014670	0.122227	1.90508	4.06651	0.00063854	up	AT1G14870	PLANT CADMIUM RESISTANCE 2
Ghir_D02G014790	0.411175	1.07972	1.451	0.00377217	up	AT1G70830	MLP-like protein 28
Ghir_D02G015360	60.175	184.42	1.70125	0.00437923	up	AT1G27330	Ribosome associated membrane protein RAMP4
Ghir_D02G016010	0.944164	8.07365	3.19036	0.00283131	up	AT5G55850	RPM1-interacting protein 4 (RIN4) family protein
Ghir_D02G016840	3.68267	28.3851	3.04559	8.86144e-06	up	AT1G23710	Protein of unknown function (DUF1645)
Ghir_D02G017140	0.440121	3.27643	2.97234	0.0103333	up	AT1G24020	MLP-like protein 423
Ghir_D02G017170	0.0843673	0.232155	1.49559	0.0391485	up	AT1G24040	Acyl-CoA N-acyltransferases (NAT) superfamily protein
Ghir_D02G017220	2.51705	0.606086	-1.96674	0.000939994	down	AT1G70210	CYCLIN D1;1
Ghir_D02G017320	1.2067	3.15027	1.45121	4.49356e-05	up	AT1G59960	NAD(P)-linked oxidoreductase superfamily protein
Ghir_D02G017340	0.258643	0.715578	1.57051	0.0486588	up	AT1G70140	formin 8
Ghir_D02G017400	0	0.081887	23.751	6.01908e-10	up	AT1G70060	SIN3-like 4
Ghir_D02G017570	3.00053	7.78533	1.45437	0.00119886	up	AT1G68530	3-ketoacyl-CoA synthase 6
Ghir_D02G017910	0.261674	2.71079	3.46814	5.47403e-10	up	AT2G46494	RING/U-box superfamily protein
Ghir_D02G018110	0.258918	0.850061	1.80037	0.030112	up	AT5G13190	CONTAINS InterPro DOMAIN/s: LPS-induced tumor necrosis factor alpha factor (InterPro:IPR006629); Has 30201 Blast hits to 17322 proteins in 780 species: Archae - 12; Bacteria - 1396; Metazoa - 17338; Fungi - 3422; Plants - 5037; Viruses - 0; Other Eukaryotes - 2996 (source: NCBI BLink).
Ghir_D02G018310	0.0769833	0	-22.4692	0.000832308	down	AT1G28130	Auxin-responsive GH3 family protein
Ghir_D02G018330	0	0.151065	9.17602	0.00566169	up	AT1G76390	ARM repeat superfamily protein
Ghir_D02G018960	0.0304653	6.41649	7.53376	1.33763e-41	up	AT1G52855	unknown protein; BEST Arabidopsis thaliana protein match is: unknown protein (TAIR:AT3G15534.1); Has 35333 Blast hits to 34131 proteins in 2444 species: Archae - 798; Bacteria - 22429; Metazoa - 974; Fungi - 991; Plants - 531; Viruses - 0; Other Eukaryotes - 9610 (source: NCBI BLink).
Ghir_D02G019040	1.13439	10.6134	3.30179	0.0370278	up	AT4G10265	Wound-responsive family protein
Ghir_D02G019180	2.30512	4.42339	1.02796	0.0129952	up	AT2G19130	S-locus lectin protein kinase family protein
Ghir_D02G019290	1.91462	13.3403	2.89117	2.75208e-08	up	AT3G09280	unknown protein; FUNCTIONS IN: molecular_function unknown; INVOLVED IN: biological_process unknown; LOCATED IN: endomembrane system; EXPRESSED IN: root; Has 31 Blast hits to 31 proteins in 9 species: Archae - 0; Bacteria - 0; Metazoa - 0; Fungi - 0; Plants - 31; Viruses - 0; Other Eukaryotes - 0 (source: NCBI BLink).
Ghir_D02G019410	0.867645	0.358436	-1.18954	0.0394878	down	AT5G04890	HSP20-like chaperones superfamily protein
Ghir_D02G020580	2.8003	1.06016	-1.338	0.0146272	down	AT5G09420	translocon at the outer membrane of chloroplasts 64-V
Ghir_D02G020840	3.6057	32.821	3.23154	0.0015462	up	AT4G24570	dicarboxylate carrier 2
Ghir_D02G020990	5.56805	12.8941	1.29409	0.00281282	up	AT2G23970	Class I glutamine amidotransferase-like superfamily protein
Ghir_D02G021330	1.91014	7.73795	2.09527	0.029653	up	AT3G19660	unknown protein; Has 16 Blast hits to 16 proteins in 6 species: Archae - 0; Bacteria - 0; Metazoa - 0; Fungi - 0; Plants - 16; Viruses - 0; Other Eukaryotes - 0 (source: NCBI BLink).
Ghir_D02G021610	2.70394	18.7398	2.89393	0.0272088	up	AT4G33920	Protein phosphatase 2C family protein
Ghir_D02G021830	1.68029	0.225355	-2.83902	0.000670249	down	AT2G23260	UDP-glucosyl transferase 84B1
Ghir_D02G021860	2.71094	11.9563	2.21827	0.00339905	up	AT4G37260	myb domain protein 73
Ghir_D02G022010	0.0706793	12.5809	7.55378	0.00116705	up	AT1G49760	poly(A) binding protein 8
Ghir_D02G022050	0.0117943	0	-45.946	1.26204e-19	down	AT5G53390	O-acyltransferase (WSD1-like) family protein
Ghir_D02G022070	0.830023	1.89326	1.26345	0.00474306	up	AT1G49780	plant U-box 26
Ghir_D02G022480	1.15125	5.54698	2.36432	0.013066	up
Ghir_D02G022500	0.804161	2.08261	1.44949	0.00697868	up	AT4G21550	VP1/ABI3-like 3
Ghir_D02G022570	4.31175	0.700445	-2.56778	0.0017059	down	AT1G60950	2Fe-2S ferredoxin-like superfamily protein
Ghir_D02G022680	0.0452987	2.71791	5.90673	0.00231913	up	AT4G34430	DNA-binding family protein
Ghir_D02G022840	3.58857	7.44406	1.12674	0.0405273	up
Ghir_D02G023750	10.0567	22.1764	1.23276	0.0463493	up	AT4G35070	SBP (S-ribonuclease binding protein) family protein
Ghir_D02G023760	133.239	61.7378	-1.03051	0.00691937	down	AT2G16850	plasma membrane intrinsic protein 2;8
Ghir_D02G023840	1.11091	2.8538	1.4607	0.0308846	up	AT3G52520	unknown protein; BEST Arabidopsis thaliana protein match is: unknown protein (TAIR:AT5G06280.3); Has 24 Blast hits to 24 proteins in 7 species: Archae - 0; Bacteria - 0; Metazoa - 0; Fungi - 0; Plants - 24; Viruses - 0; Other Eukaryotes - 0 (source: NCBI BLink).
Ghir_D02G024390	0.338778	1.66919	2.35893	0.0024231	up	AT1G49310	unknown protein; FUNCTIONS IN: molecular_function unknown; INVOLVED IN: biological_process unknown; LOCATED IN: endomembrane system; EXPRESSED IN: 9 plant structures; EXPRESSED DURING: LP.04 four leaves visible, petal differentiation and expansion stage; Has 11 Blast hits to 11 proteins in 6 species: Archae - 0; Bacteria - 0; Metazoa - 0; Fungi - 0; Plants - 11; Viruses - 0; Other Eukaryotes - 0 …
Ghir_D02G024670	0	0.769238	9.29748	5.24771e-06	up	AT3G26600	armadillo repeat only 4
Ghir_D03G000560	2.75592	8.83189	1.75677	0.00239771	up	AT2G17705	unknown protein; FUNCTIONS IN: molecular_function unknown; INVOLVED IN: biological_process unknown; LOCATED IN: plasma membrane; EXPRESSED IN: cultured cell; BEST Arabidopsis thaliana protein match is: unknown protein (TAIR:AT4G08330.1); Has 135 Blast hits to 135 proteins in 32 species: Archae - 5; Bacteria - 29; Metazoa - 0; Fungi - 0; Plants - 91; Viruses - 0; Other Eukaryotes - 10 (source: NCB…
Ghir_D03G000630	3.67561	9.34567	1.45328	0.00992768	up	AT2G17760	Eukaryotic aspartyl protease family protein
Ghir_D03G000640	0.302123	2.63203	3.1852	0.00105149	up	AT5G42180	Peroxidase superfamily protein
Ghir_D03G000830	0.101397	0	-8.54212	0.0021955	down	AT2G17820	histidine kinase 1
Ghir_D03G000850	0.0401433	0	-21.4377	1.42703e-08	down	AT5G66150	Glycosyl hydrolase family 38 protein
Ghir_D03G001130	2.85286	1.21699	-1.15182	4.27552e-06	down	AT4G36250	aldehyde dehydrogenase 3F1
Ghir_D03G001360	7.29057	3.3722	-1.0271	0.00871182	down	AT4G36550	ARM repeat superfamily protein
Ghir_D03G001470	2.32056	4.82398	1.13139	0.0191391	up	AT5G49560	Putative methyltransferase family protein
Ghir_D03G002300	1.72235	3.70565	1.19855	0.0364891	up	AT4G36990	heat shock factor 4
Ghir_D03G002880	0.123716	1.81945	3.99228	3.58635e-13	up	AT5G67480	BTB and TAZ domain protein 4
Ghir_D03G002900	1.44878	10.5611	2.97896	0.000453641	up	AT4G37640	calcium ATPase 2
Ghir_D03G003680	4.54826	11.3832	1.41035	0.000215544	up	AT4G39840	unknown protein; FUNCTIONS IN: molecular_function unknown; INVOLVED IN: biological_process unknown; LOCATED IN: endomembrane system; EXPRESSED IN: 23 plant structures; EXPRESSED DURING: 13 growth stages; Has 20719 Blast hits to 6096 proteins in 607 species: Archae - 22; Bacteria - 3243; Metazoa - 4364; Fungi - 2270; Plants - 237; Viruses - 128; Other Eukaryotes - 10455 (source: NCBI BLink).
Ghir_D03G004140	0.875535	6.41972	2.95188	0.000808873	up	AT1G74100	sulfotransferase 16
Ghir_D03G004830	0.210953	1.31084	2.73386	0.00687314	up	AT5G64750	Integrase-type DNA-binding superfamily protein
Ghir_D03G004870	0.215546	4.7976	4.56332	0.0171193	up
Ghir_D03G005180	0	1.89181	11.4539	0.000290142	up	AT5G57560	Xyloglucan endotransglucosylase/hydrolase family protein
Ghir_D03G005440	5.33938	14.9825	1.56806	1.08194e-08	up	AT2G23910	NAD(P)-binding Rossmann-fold superfamily protein
Ghir_D03G005610	0.129917	2.55255	4.34814	1.06725e-06	up
Ghir_D03G006560	0.141038	3.55627	4.7504	0.00431982	up	AT1G31130	unknown protein; FUNCTIONS IN: molecular_function unknown; INVOLVED IN: biological_process unknown; LOCATED IN: cellular_component unknown; EXPRESSED IN: 23 plant structures; EXPRESSED DURING: 13 growth stages; BEST Arabidopsis thaliana protein match is: unknown protein (TAIR:AT4G19950.1); Has 246 Blast hits to 244 proteins in 29 species: Archae - 2; Bacteria - 16; Metazoa - 0; Fungi - 0; Plants …
Ghir_D03G007590	0	0.00300467	19.1518	0.0130902	up	AT3G57550	guanylate kinase
Ghir_D03G007870	0.903327	7.96547	3.21149	1.21649e-11	up	AT3G57670	C2H2-type zinc finger family protein
Ghir_D03G007950	1.2014	0.103465	-3.44408	0.012803	down	AT5G06530	ABC-2 type transporter family protein
Ghir_D03G008140	0.921379	0.12275	-2.78208	0.000782709	down	ATCG00280	photosystem II reaction center protein C
Ghir_D03G008320	0.07009	0.761699	3.34972	0.00268215	up	ATCG00520	unfolded protein binding
Ghir_D03G008330	0.461471	3.41466	2.95931	6.25734e-07	up	ATCG00530	CemA-like proton extrusion protein-related
Ghir_D03G008350	0.088816	1.57973	4.16836	8.65582e-11	up	ATCG00500	acetyl-CoA carboxylase carboxyl transferase subunit beta
Ghir_D03G008360	0.332788	3.95908	3.62896	2.07985e-07	up	ATCG00020	photosystem II reaction center protein A
Ghir_D03G008380	0.169722	0.745845	2.15057	0.0455905	up	ATCG00680	photosystem II reaction center protein B
Ghir_D03G008620	0.0287797	0.17749	2.62621	2.25837e-05	up	AT1G64065	Late embryogenesis abundant (LEA) hydroxyproline-rich glycoprotein family
Ghir_D03G008840	2.52401	0.976587	-1.29715	0.000296304	down	AT5G41610	cation/H+ exchanger 18
Ghir_D03G009260	0	1.40413	36.0508	2.13827e-18	up	AT3G61920	unknown protein; FUNCTIONS IN: molecular_function unknown; INVOLVED IN: N-terminal protein myristoylation; LOCATED IN: cellular_component unknown; EXPRESSED IN: shoot, hypocotyl, root, egg cell; BEST Arabidopsis thaliana protein match is: unknown protein (TAIR:AT1G64700.1); Has 77 Blast hits to 77 proteins in 8 species: Archae - 0; Bacteria - 0; Metazoa - 0; Fungi - 0; Plants - 77; Viruses - 0; O…
Ghir_D03G009370	18.3111	8.26352	-1.07353	0.00589123	down	AT1G02800	cellulase 2
Ghir_D03G009670	0.0383863	0.458316	3.6023	0.0338195	up	AT4G10850	Nodulin MtN3 family protein
Ghir_D03G009730	0.0281227	0.409752	3.90193	0.000301443	up	AT3G44326	F-box family protein
Ghir_D03G010080	1.47115	0.380155	-1.8844	0.000447858	down	AT3G01470	homeobox 1
Ghir_D03G010450	0.02115	2.52564	7.12432	2.18404e-13	up	AT2G03350	Protein of unknown function, DUF538
Ghir_D03G010730	13.0166	5.06331	-1.2951	1.40419e-05	down	AT5G08060	unknown protein; FUNCTIONS IN: molecular_function unknown; INVOLVED IN: biological_process unknown; LOCATED IN: mitochondrion; EXPRESSED IN: 24 plant structures; EXPRESSED DURING: 16 growth stages; Has 42 Blast hits to 42 proteins in 17 species: Archae - 0; Bacteria - 0; Metazoa - 0; Fungi - 0; Plants - 41; Viruses - 0; Other Eukaryotes - 1 (source: NCBI BLink).
Ghir_D03G011270	1.30247	4.02984	1.72067	0.00352862	up	AT3G48330	protein-l-isoaspartate methyltransferase 1
Ghir_D03G011290	0.576758	1.15063	1.08195	0.00965127	up	AT2G31880	Leucine-rich repeat protein kinase family protein
Ghir_D03G011470	0.354463	0.876422	1.38641	0.0159749	up	AT5G50360	unknown protein; BEST Arabidopsis thaliana protein match is: unknown protein (TAIR:AT3G48510.1); Has 1807 Blast hits to 1807 proteins in 277 species: Archae - 0; Bacteria - 0; Metazoa - 736; Fungi - 347; Plants - 385; Viruses - 0; Other Eukaryotes - 339 (source: NCBI BLink).
Ghir_D03G011890	1.47322	0.175148	-2.98063	0.000516516	down	AT1G12240	Glycosyl hydrolases family 32 protein
Ghir_D03G012320	5.82601	2.35493	-1.22869	0.0372872	down	AT5G51060	NADPH/respiratory burst oxidase protein D
Ghir_D03G013040	0.0383497	0.010944	-1.79255	0.00203242	down	AT5G58880	unknown protein; BEST Arabidopsis thaliana protein match is: unknown protein (TAIR:AT2G29620.1); Has 1807 Blast hits to 1807 proteins in 277 species: Archae - 0; Bacteria - 0; Metazoa - 736; Fungi - 347; Plants - 385; Viruses - 0; Other Eukaryotes - 339 (source: NCBI BLink).
Ghir_D03G013280	1.33634	3.28802	1.3699	0.0221801	up	AT5G59050	unknown protein; BEST Arabidopsis thaliana protein match is: unknown protein (TAIR:AT3G54000.1); Has 35333 Blast hits to 34131 proteins in 2444 species: Archae - 798; Bacteria - 22429; Metazoa - 974; Fungi - 991; Plants - 531; Viruses - 0; Other Eukaryotes - 9610 (source: NCBI BLink).
Ghir_D03G014160	0.497413	0	-25.8028	2.93431e-12	down	AT5G59900	Pentatricopeptide repeat (PPR) superfamily protein
Ghir_D03G014240	0.526011	11.9227	4.61215	0.00157483	up	AT5G59820	C2H2-type zinc finger family protein
Ghir_D03G014630	0.208345	10.8583	5.80159	1.89406e-07	up	AT3G45640	mitogen-activated protein kinase 3
Ghir_D03G014700	23.1507	176.064	3.01722	6.03268e-08	up	AT2G27080	Late embryogenesis abundant (LEA) hydroxyproline-rich glycoprotein family
Ghir_D03G015360	0.104686	0.387434	1.96473	0.012422	up	AT2G16030	S-adenosyl-L-methionine-dependent methyltransferases superfamily protein
Ghir_D03G015530	4.67551	1.85227	-1.25458	0.00280762	down	AT3G51770	tetratricopeptide repeat (TPR)-containing protein
Ghir_D03G015780	1.80122	10.3729	2.6198	2.73612e-05	up	AT2G38470	WRKY DNA-binding protein 33
Ghir_D03G015820	3.66517	1.14392	-1.61611	0.0133066	down	AT2G30270	Protein of unknown function (DUF567)
Ghir_D03G015930	19.824	54.6751	1.55669	1.18677e-05	up	AT2G30360	SOS3-interacting protein 4
Ghir_D03G016560	1.33407	0.00991867	-6.82349	0.0460577	down	AT4G11450	Protein of unknown function (DUF3527)
Ghir_D03G016930	0.350659	0.0843767	-1.94506	0.0421129	down	AT5G51920	Pyridoxal phosphate (PLP)-dependent transferases superfamily protein
Ghir_D03G017210	1.14334	0.478724	-1.16327	0.0415338	down	AT4G12130	Glycine cleavage T-protein family
Ghir_D03G017480	0.288726	0.0829717	-1.70834	0.0173673	down	AT1G12260	NAC 007
Ghir_D03G017550	2.54251	0.921548	-1.39208	0.0275461	down	AT3G60670	PLATZ transcription factor family protein
Ghir_D03G018040	6.35552	107.364	4.16286	2.52464e-17	up	AT5G47230	ethylene responsive element binding factor 5
Ghir_D03G018170	5.8496	44.0875	2.99729	4.6234e-05	up	AT3G01680	CONTAINS InterPro DOMAIN/s: Mediator complex subunit Med28 (InterPro:IPR021640); BEST Arabidopsis thaliana protein match is: unknown protein (TAIR:AT3G01670.1); Has 122 Blast hits to 112 proteins in 13 species: Archae - 0; Bacteria - 0; Metazoa - 0; Fungi - 0; Plants - 122; Viruses - 0; Other Eukaryotes - 0 (source: NCBI BLink).
Ghir_D03G018200	0	0.308693	8.99711	7.79305e-06	up	AT4G10720	Ankyrin repeat family protein
Ghir_D03G018390	0.390426	1.44281	1.94606	0.00386987	up	AT1G32450	nitrate transporter 1.5
Ghir_D03G018570	9.75898	19.4713	1.06625	0.0134828	up	AT4G17890	ARF-GAP domain 8
Ghir_D03G019030	1.23147	2.40066	1.05065	0.0134952	up	AT5G25450	Cytochrome bd ubiquinol oxidase, 14kDa subunit
Ghir_D04G000080	0.00746433	0.85529	6.79906	3.19349e-09	up	AT1G70140	formin 8
Ghir_D04G000090	0.658036	2.17232	1.78987	0.0321029	up	AT5G50110	S-adenosyl-L-methionine-dependent methyltransferases superfamily protein
Ghir_D04G000150	0.421537	1.27573	1.67753	0.000103043	up	AT3G49220	Plant invertase/pectin methylesterase inhibitor superfamily
Ghir_D04G000530	4.94817	1.39153	-1.73517	0.00403175	down	AT3G54860	Sec1/munc18-like (SM) proteins superfamily
Ghir_D04G000970	0.430208	8.28705	4.3349	0.003949	up	AT5G11970	Protein of unknown function (DUF3511)
Ghir_D04G001360	1.35502	6.36289	2.30485	0.0151079	up	AT2G40610	expansin A8
Ghir_D04G001400	13.2753	79.6066	2.67656	2.4978e-12	up	AT3G56360	unknown protein; FUNCTIONS IN: molecular_function unknown; INVOLVED IN: biological_process unknown; LOCATED IN: chloroplast; EXPRESSED IN: 24 plant structures; EXPRESSED DURING: 15 growth stages; BEST Arabidopsis thaliana protein match is: unknown protein (TAIR:AT5G05250.1); Has 45 Blast hits to 45 proteins in 13 species: Archae - 0; Bacteria - 0; Metazoa - 0; Fungi - 0; Plants - 45; Viruses - 0;…
Ghir_D04G001560	4.33023	1.72452	-1.25059	0.000643431	down	AT3G56230	BTB/POZ domain-containing protein
Ghir_D04G001580	0.079677	2.21963	4.83404	7.44434e-05	up	AT2G31945	unknown protein; FUNCTIONS IN: molecular_function unknown; INVOLVED IN: biological_process unknown; LOCATED IN: endomembrane system; EXPRESSED IN: 8 plant structures; EXPRESSED DURING: 4 anthesis, petal differentiation and expansion stage; BEST Arabidopsis thaliana protein match is: unknown protein (TAIR:AT1G05575.1); Has 61 Blast hits to 61 proteins in 10 species: Archae - 0; Bacteria - 0; Metaz…
Ghir_D04G002050	1.74802	0.475336	-1.77388	0.00935242	down	AT5G16850	telomerase reverse transcriptase
Ghir_D04G002660	3.71164	8.02507	1.2051	0.00837406	up	AT3G02800	Tyrosine phosphatase family protein
Ghir_D04G002690	0.00948	0.989858	6.74918	2.48489e-10	up	AT3G01680	CONTAINS InterPro DOMAIN/s: Mediator complex subunit Med28 (InterPro:IPR021640); BEST Arabidopsis thaliana protein match is: unknown protein (TAIR:AT3G01670.1); Has 122 Blast hits to 112 proteins in 13 species: Archae - 0; Bacteria - 0; Metazoa - 0; Fungi - 0; Plants - 122; Viruses - 0; Other Eukaryotes - 0 (source: NCBI BLink).
Ghir_D04G002700	0.323722	4.13215	3.74578	2.95994e-16	up	AT1G65295	unknown protein; LOCATED IN: endomembrane system; EXPRESSED IN: 22 plant structures; EXPRESSED DURING: 13 growth stages; BEST Arabidopsis thaliana protein match is: unknown protein (TAIR:AT5G01015.1); Has 90 Blast hits to 90 proteins in 15 species: Archae - 0; Bacteria - 0; Metazoa - 0; Fungi - 0; Plants - 90; Viruses - 0; Other Eukaryotes - 0 (source: NCBI BLink).
Ghir_D04G003270	0	0.369294	8.83927	0.00295712	up	AT1G77145	Protein of unknown function (DUF506)
Ghir_D04G003420	0.943519	3.56914	2.00596	0.000606346	up	AT4G33440	Pectin lyase-like superfamily protein
Ghir_D04G003650	0.34543	0.01422	-4.30131	0.0146348	down	AT5G09220	amino acid permease 2
Ghir_D04G003790	4.25431	0.751022	-2.44421	0.0382275	down	AT1G06680	photosystem II subunit P-1
Ghir_D04G003980	16.531	6.15619	-1.34864	0.00962474	down	AT2G42910	Phosphoribosyltransferase family protein
Ghir_D04G004090	0	0.161935	23.7131	0.000752002	up	AT3G42170	BED zinc finger ;hAT family dimerisation domain
Ghir_D04G004720	0.172095	0	-22.0034	3.42061e-17	down	AT3G02090	Insulinase (Peptidase family M16) protein
Ghir_D04G004790	0	0.112255	28.6386	1.65582e-05	up	AT5G15450	casein lytic proteinase B3
Ghir_D04G005190	0.062798	15.6223	7.96443	9.52414e-12	up
Ghir_D04G005500	6.40144	17.5573	1.53275	0.000997367	up	AT3G28480	Oxoglutarate/iron-dependent oxygenase
Ghir_D04G006810	3.04969	10.4996	1.87342	2.65978e-06	up	AT2G39720	RING-H2 finger C2A
Ghir_D04G006870	19.2159	54.2173	1.57877	0.00190909	up	AT3G11410	protein phosphatase 2CA
Ghir_D04G007340	0.208756	0.525652	1.38527	0.000779899	up	AT3G55990	Plant protein of unknown function (DUF828)
Ghir_D04G007400	0.699805	1.91337	1.51297	0.00772029	up	AT2G40200	basic helix-loop-helix (bHLH) DNA-binding superfamily protein
Ghir_D04G007410	0.270404	1.23878	2.25394	0.00746541	up	AT2G23290	myb domain protein 70
Ghir_D04G007690	0.121752	0.420939	1.87327	0.0123219	up	AT2G16770	Basic-leucine zipper (bZIP) transcription factor family protein
Ghir_D04G007710	0	0.888946	11.0686	1.4329e-09	up	AT1G02205	Fatty acid hydroxylase superfamily
Ghir_D04G007720	0.003205	0.0855067	4.51428	0.00124566	up	AT1G02190	Fatty acid hydroxylase superfamily
Ghir_D04G007960	0.621413	0.242062	-1.28549	0.0245833	down	AT5G14070	Thioredoxin superfamily protein
Ghir_D04G008240	0.0180797	0.283455	3.94995	0.00282393	up	AT3G01900	cytochrome P450, family 94, subfamily B, polypeptide 2
Ghir_D04G008440	0.344859	1.95655	2.61979	0.0470379	up	AT3G01750	Ankyrin repeat family protein
Ghir_D04G008640	0.085784	0.297058	1.81904	0.0433364	up
Ghir_D04G009290	1.06956	3.11974	1.62241	0.0475563	up	AT2G41970	Protein kinase superfamily protein
Ghir_D04G009370	1.8445	5.81921	1.74093	1.26556e-08	up	AT4G37790	Homeobox-leucine zipper protein family
Ghir_D04G009880	0.736098	1.4264	1.0283	0.0420805	up	AT3G11640	unknown protein; FUNCTIONS IN: molecular_function unknown; INVOLVED IN: biological_process unknown; LOCATED IN: endomembrane system; BEST Arabidopsis thaliana protein match is: unknown protein (TAIR:AT3G52480.1); Has 36 Blast hits to 36 proteins in 7 species: Archae - 0; Bacteria - 0; Metazoa - 0; Fungi - 0; Plants - 36; Viruses - 0; Other Eukaryotes - 0 (source: NCBI BLink).
Ghir_D04G009900	5.66181	17.8134	1.73268	1.89301e-13	up	AT3G11660	NDR1/HIN1-like 1
Ghir_D04G009980	5.26103	0.105082	-5.52666	0.019685	down	AT3G05680	embryo defective 2016
Ghir_D04G010040	1.95544	6.65346	1.89904	0.0230234	up	AT3G11820	syntaxin of plants 121
Ghir_D04G010380	0	0.285845	7.92723	0.00115183	up	AT5G22380	NAC domain containing protein 90
Ghir_D04G010730	40.5407	107.607	1.48325	0.00351616	up	AT3G52610	unknown protein; Has 68 Blast hits to 67 proteins in 21 species: Archae - 0; Bacteria - 11; Metazoa - 0; Fungi - 0; Plants - 55; Viruses - 0; Other Eukaryotes - 2 (source: NCBI BLink).
Ghir_D04G010790	3.17299	12.0231	2.00449	0.000245882	up	AT3G52710	unknown protein; FUNCTIONS IN: molecular_function unknown; INVOLVED IN: biological_process unknown; LOCATED IN: plasma membrane; EXPRESSED IN: 19 plant structures; EXPRESSED DURING: 9 growth stages; BEST Arabidopsis thaliana protein match is: unknown protein (TAIR:AT2G36220.1); Has 64 Blast hits to 64 proteins in 10 species: Archae - 0; Bacteria - 0; Metazoa - 0; Fungi - 0; Plants - 64; Viruses -…
Ghir_D04G011070	2.15793	5.45113	1.38511	0.0376366	up	AT3G59310	Eukaryotic protein of unknown function (DUF914)
Ghir_D04G011140	0.325196	0.677651	1.14617	0.0118088	up	AT3G52870	IQ calmodulin-binding motif family protein
Ghir_D04G011680	0.088002	0.692635	3.05352	3.4563e-09	up	AT2G36690	2-oxoglutarate (2OG) and Fe(II)-dependent oxygenase superfamily protein
Ghir_D04G011860	5.60351	2.14103	-1.3155	3.75576e-06	down	AT5G03530	RAB GTPase homolog C2A
Ghir_D04G012280	0.960769	2.4985	1.45698	0.00931971	up	AT5G03230	Protein of unknown function, DUF584
Ghir_D04G012710	7.95999	0.0841053	-6.43863	0.00121775	down	AT2G37380	unknown protein; BEST Arabidopsis thaliana protein match is: unknown protein (TAIR:AT2G39370.1); Has 1284 Blast hits to 422 proteins in 114 species: Archae - 0; Bacteria - 90; Metazoa - 125; Fungi - 151; Plants - 136; Viruses - 0; Other Eukaryotes - 782 (source: NCBI BLink).
Ghir_D04G012990	0.227044	4.26693	4.29499	1.39615e-06	up	AT5G02540	NAD(P)-binding Rossmann-fold superfamily protein
Ghir_D04G013340	0.151567	1.78124	3.64715	0.00026751	up	AT3G23160	Protein of unknown function (DUF668)
Ghir_D04G013750	3.91031	9.45831	1.38389	0.0103589	up	AT2G37980	O-fucosyltransferase family protein
Ghir_D04G014160	0	0.48549	9.26233	0.00605417	up	AT5G01370	ALC-interacting protein 1
Ghir_D04G014190	0.143019	1.52247	3.51389	1.07887e-05	up	AT1G58330	transcription factor-related
Ghir_D04G014250	0.779498	2.01312	1.42694	0.031277	up
Ghir_D04G014590	0.011248	0.126635	3.53729	4.1322e-06	up	AT5G01700	Protein phosphatase 2C family protein
Ghir_D04G014600	9.35036	19.6964	1.16545	0.00518746	up	AT5G01710	methyltransferases
Ghir_D04G014610	0.165685	1.06002	2.76164	0.000724716	up	AT2G38480	Uncharacterised protein family (UPF0497)
Ghir_D04G014620	1.49277	30.4225	4.46361	0.000136607	up	AT2G38470	WRKY DNA-binding protein 33
Ghir_D04G014870	0.10748	0.390271	1.92692	0.0314429	up	AT1G68460	isopentenyltransferase 1
Ghir_D04G015160	2.19463	7.77687	1.90308	9.47828e-08	up	AT5G13180	NAC domain containing protein 83
Ghir_D04G015390	0.014987	0.298338	4.31931	0.0114612	up	AT3G49190	O-acyltransferase (WSD1-like) family protein
Ghir_D04G015510	0.286139	2.47348	3.20111	3.09161e-08	up	AT4G28290	unknown protein; FUNCTIONS IN: molecular_function unknown; INVOLVED IN: biological_process unknown; LOCATED IN: chloroplast; EXPRESSED IN: 23 plant structures; EXPRESSED DURING: 15 growth stages; Has 45 Blast hits to 45 proteins in 11 species: Archae - 0; Bacteria - 0; Metazoa - 0; Fungi - 0; Plants - 45; Viruses - 0; Other Eukaryotes - 0 (source: NCBI BLink).
Ghir_D04G015610	1.06472	0.4168	-1.27164	6.78874e-05	down	AT4G02340	alpha/beta-Hydrolases superfamily protein
Ghir_D04G015670	2.53502	5.54341	1.19142	0.0417281	up
Ghir_D04G015910	6.23166	40.2976	2.7817	7.77651e-05	up	AT4G15248	B-box type zinc finger family protein
Ghir_D04G016360	0.149581	1.99133	3.79553	1.20422e-19	up	AT1G76490	hydroxy methylglutaryl CoA reductase 1
Ghir_D04G016380	0.132167	0.520099	2.04881	0.0306226	up
Ghir_D04G016830	1.03163	2.66373	1.45801	0.000165085	up	AT4G33565	RING/U-box superfamily protein
Ghir_D04G016930	0.0608147	0.005288	-3.58835	0.000568343	down	AT5G10530	Concanavalin A-like lectin protein kinase family protein
Ghir_D04G016980	0.0271123	0.131868	2.33526	0.0249635	up	AT2G23970	Class I glutamine amidotransferase-like superfamily protein
Ghir_D04G017310	86.5043	188.379	1.20727	0.00193049	up	AT5G59845	Gibberellin-regulated family protein
Ghir_D04G017410	0.0409793	0.391839	3.28214	9.49268e-06	up	AT2G15490	UDP-glycosyltransferase 73B4
Ghir_D04G017930	0	0.54981	9.3743	0.00309417	up	AT2G21490	dehydrin LEA
Ghir_D04G018400	0.438511	0.13529	-1.61546	0.0100161	down	AT1G25270	nodulin MtN21 /EamA-like transporter family protein
Ghir_D04G018820	0.142147	0.450897	1.74767	0.00114345	up
Ghir_D04G019460	0.611763	11.2491	4.29117	1.42703e-08	up	AT1G70420	Protein of unknown function (DUF1645)
Ghir_D04G019780	2.83964	0.0413423	-5.96178	0.0352735	down	AT1G67550	urease
Ghir_D04G019830	7.20399	24.7923	1.83845	0.0442331	up	AT1G67430	Ribosomal protein L22p/L17e family protein
Ghir_D04G019950	0.382011	0.89153	1.32769	0.0367588	up	AT1G32490	RNA helicase family protein
Ghir_D04G020730	0.0156907	2.91489	7.55252	0.00107576	up	AT5G15310	myb domain protein 16
Ghir_D05G000490	5.46372	2.23887	-1.22214	0.0160195	down	AT1G53720	cyclophilin 59
Ghir_D05G000520	0.352801	4.43023	3.70108	3.83297e-05	up	AT1G29660	GDSL-like Lipase/Acylhydrolase superfamily protein
Ghir_D05G000780	0.189048	5.29324	4.87988	2.43796e-05	up	AT4G25810	xyloglucan endotransglycosylase 6
Ghir_D05G000980	5.08367	2.05604	-1.21923	0.0251751	down	AT2G23890	HAD-superfamily hydrolase, subfamily IG, 5'-nucleotidase
Ghir_D05G001750	0.981968	4.06277	2.1155	3.80873e-10	up	AT4G32280	indole-3-acetic acid inducible 29
Ghir_D05G002010	0	0.901105	10.8937	7.18928e-11	up	AT2G30300	Major facilitator superfamily protein
Ghir_D05G002040	0.004075	0.12666	4.41209	0.0185108	up	AT5G25940	early nodulin-related
Ghir_D05G002160	0.627475	2.30293	1.95731	4.04655e-05	up	AT2G18660	plant natriuretic peptide A
Ghir_D05G002220	11.0936	30.9445	1.5421	0.0127512	up
Ghir_D05G002340	1.24452	3.49254	1.55972	0.00485407	up	AT5G25510	Protein phosphatase 2A regulatory B subunit family protein
Ghir_D05G002830	0.45005	2.17833	2.34568	0.00250559	up	AT4G29140	MATE efflux family protein
Ghir_D05G002880	0	0.755263	10.2281	1.36711e-08	up	AT5G56590	O-Glycosyl hydrolases family 17 protein
Ghir_D05G003100	2.21296	4.25458	1.03401	0.0162722	up	AT4G29460	Phospholipase A2 family protein
Ghir_D05G003210	7.39084	3.484	-1.0078	0.000267384	down	AT4G29720	polyamine oxidase 5
Ghir_D05G003300	0.0775233	0.739359	3.32238	8.46994e-05	up	AT5G57010	calmodulin-binding family protein
Ghir_D05G003390	0.08662	0.269316	1.67316	0.0358078	up	AT5G49690	UDP-Glycosyltransferase superfamily protein
Ghir_D05G003410	0.492922	0.169216	-1.45878	0.00131895	down	AT4G33080	AGC (cAMP-dependent, cGMP-dependent and protein kinase C) kinase family protein
Ghir_D05G003740	0.38054	1.41838	1.99688	2.68157e-05	up	AT1G19210	Integrase-type DNA-binding superfamily protein
Ghir_D05G004230	0.42981	2.09338	2.3736	0.000406247	up	AT3G13980	unknown protein; BEST Arabidopsis thaliana protein match is: unknown protein (TAIR:AT1G54200.1); Has 1485 Blast hits to 418 proteins in 98 species: Archae - 0; Bacteria - 6; Metazoa - 246; Fungi - 61; Plants - 107; Viruses - 6; Other Eukaryotes - 1059 (source: NCBI BLink).
Ghir_D05G004320	0.258688	0	-23.5713	0.000822405	down	AT1G72770	homology to ABI1
Ghir_D05G004510	8.22086	18.9454	1.29147	1.13863e-05	up	AT5G11890	FUNCTIONS IN: molecular_function unknown; LOCATED IN: plasma membrane; EXPRESSED IN: 12 plant structures; EXPRESSED DURING: 6 growth stages; BEST Arabidopsis thaliana protein match is: Late embryogenesis abundant (LEA) hydroxyproline-rich glycoprotein family (TAIR:AT1G17620.1); Has 1807 Blast hits to 1807 proteins in 277 species: Archae - 0; Bacteria - 0; Metazoa - 736; Fungi - 347; Plants - 385;…
Ghir_D05G004700	1.19411	4.21134	1.9025	6.23696e-10	up	AT5G26010	Protein phosphatase 2C family protein
Ghir_D05G005320	1.3367	0.0122747	-6.62191	0.0104924	down	AT5G20320	dicer-like 4
Ghir_D05G005560	0.176331	0.521463	1.63565	0.00809988	up	AT5G48930	hydroxycinnamoyl-CoA shikimate/quinate hydroxycinnamoyl transferase
Ghir_D05G005810	1.94733	4.16843	1.17853	0.00124566	up	AT4G32295	unknown protein; BEST Arabidopsis thaliana protein match is: unknown protein (TAIR:AT3G24150.1); Has 39 Blast hits to 39 proteins in 10 species: Archae - 0; Bacteria - 0; Metazoa - 0; Fungi - 0; Plants - 39; Viruses - 0; Other Eukaryotes - 0 (source: NCBI BLink).
Ghir_D05G005830	0.0891833	0.95564	3.49131	0.000484086	up	AT4G32280	indole-3-acetic acid inducible 29
Ghir_D05G006040	1.27745	3.85929	1.69991	0.0195536	up	AT5G11000	Plant protein of unknown function (DUF868)
Ghir_D05G006130	12.0011	23.3423	1.03911	1.4169e-08	up	AT2G25110	stromal cell-derived factor 2-like protein precursor
Ghir_D05G006180	0.687704	0	-25.5935	0.000193415	down	AT5G10930	CBL-interacting protein kinase 5
Ghir_D05G006190	1.66628	62.4254	5.31645	0.000212768	up	AT1G80840	WRKY DNA-binding protein 40
Ghir_D05G006460	1.3337	4.62181	1.86613	0.019778	up	AT5G10770	Eukaryotic aspartyl protease family protein
Ghir_D05G006520	37.79	11.5335	-1.63215	0.000335905	down	AT5G24930	CONSTANS-like 4
Ghir_D05G006640	5.20608	10.2977	1.06644	0.0101782	up	AT5G24890	unknown protein; FUNCTIONS IN: molecular_function unknown; INVOLVED IN: biological_process unknown; LOCATED IN: cellular_component unknown; EXPRESSED IN: 24 plant structures; EXPRESSED DURING: 13 growth stages; BEST Arabidopsis thaliana protein match is: unknown protein (TAIR:AT2G24550.1); Has 1807 Blast hits to 1807 proteins in 277 species: Archae - 0; Bacteria - 0; Metazoa - 736; Fungi - 347; P…
Ghir_D05G007120	59.1123	0.611533	-6.49429	0.00673933	down	AT4G12320	cytochrome P450, family 706, subfamily A, polypeptide 6
Ghir_D05G007460	11.3736	2.77087	-1.96274	0.00686568	down	AT2G03120	signal peptide peptidase
Ghir_D05G007670	0.16036	2.03499	3.71079	0.00452983	up
Ghir_D05G007990	0.0146077	0	-4.87766	0.0432871	down	AT5G04885	Glycosyl hydrolase family protein
Ghir_D05G008500	13.6266	48.3142	1.92626	0.00310364	up	AT2G27580	A20/AN1-like zinc finger family protein
Ghir_D05G008670	36.9558	10.8949	-1.65863	0.047318	down	AT5G22580	Stress responsive A/B Barrel Domain
Ghir_D05G008680	1.89566	0.427167	-2.07625	0.0401185	down	AT2G27770	Plant protein of unknown function (DUF868)
Ghir_D05G008820	0.184091	0.059175	-1.56978	0.0342834	down	AT5G22870	Late embryogenesis abundant (LEA) hydroxyproline-rich glycoprotein family
Ghir_D05G008880	0.0607107	0.38926	2.69938	0.00156367	up	AT2G28200	C2H2-type zinc finger family protein
Ghir_D05G009280	10.4535	3.71532	-1.41876	0.00175329	down	AT5G58930	Protein of unknown function (DUF740)
Ghir_D05G009580	5.94634	12.3829	1.14031	4.01049e-06	up	AT5G59350	unknown protein; FUNCTIONS IN: molecular_function unknown; INVOLVED IN: biological_process unknown; LOCATED IN: endomembrane system; EXPRESSED IN: 23 plant structures; EXPRESSED DURING: 13 growth stages; Has 1807 Blast hits to 1807 proteins in 277 species: Archae - 0; Bacteria - 0; Metazoa - 736; Fungi - 347; Plants - 385; Viruses - 0; Other Eukaryotes - 339 (source: NCBI BLink).
Ghir_D05G009590	6.19923	26.6212	2.19741	0.0355616	up	AT5G02500	heat shock cognate protein 70-1
Ghir_D05G009740	2.05565	3.9394	1.028	0.0477013	up	AT3G55280	ribosomal protein L23AB
Ghir_D05G009780	0.463789	2.03685	2.21076	6.43128e-13	up	AT2G28630	3-ketoacyl-CoA synthase 12
Ghir_D05G009790	2.47576	5.96482	1.3541	0.0157853	up	AT3G46200	nudix hydrolase homolog 9
Ghir_D05G009800	0.004891	1.19958	7.86443	0.000685615	up	AT3G46220	unknown protein; CONTAINS InterPro DOMAIN/s: Protein of unknown function DUF2042 (InterPro:IPR018611); Has 559 Blast hits to 533 proteins in 154 species: Archae - 3; Bacteria - 32; Metazoa - 305; Fungi - 42; Plants - 50; Viruses - 3; Other Eukaryotes - 124 (source: NCBI BLink).
Ghir_D05G009860	0.624313	1.37137	1.21585	0.000803739	up	AT5G59990	CCT motif family protein
Ghir_D05G010270	0.0858457	28.0265	8.35212	8.66449e-23	up	AT5G60660	plasma membrane intrinsic protein 2;4
Ghir_D05G010460	0.104426	0	-29.172	1.07887e-05	down	AT1G08060	ATP-dependent helicase family protein
Ghir_D05G010650	0.145363	0.0286327	-2.20057	0.0422123	down	AT5G57620	myb domain protein 36
Ghir_D05G010710	1.17275	5.30731	2.27078	7.81122e-12	up	AT5G22930	Protein of unknown function (DUF1635)
Ghir_D05G011240	1.01117	3.78225	1.99048	2.54281e-05	up	AT1G07090	Protein of unknown function (DUF640)
Ghir_D05G012660	0.0892917	0.250428	1.56982	0.0438125	up	AT1G80180	unknown protein; FUNCTIONS IN: molecular_function unknown; INVOLVED IN: biological_process unknown; LOCATED IN: plasma membrane; EXPRESSED IN: 21 plant structures; EXPRESSED DURING: 10 growth stages; BEST Arabidopsis thaliana protein match is: unknown protein (TAIR:AT1G15400.3); Has 30201 Blast hits to 17322 proteins in 780 species: Archae - 12; Bacteria - 1396; Metazoa - 17338; Fungi - 3422; Pla…
Ghir_D05G013060	6.42865	1.78694	-1.7593	0.0433044	down	AT3G16110	PDI-like 1-6
Ghir_D05G013190	4.12357	0.771935	-2.34171	0.000486388	down	AT1G52190	Major facilitator superfamily protein
Ghir_D05G013360	1.10265	10.6511	3.31406	0.00120571	up	AT3G16500	phytochrome-associated protein 1
Ghir_D05G013430	9.60348	20.6737	1.17998	0.000952161	up	AT1G14520	myo-inositol oxygenase 1
Ghir_D05G013450	1.9981	0.937584	-1.01413	0.0259103	down	AT2G25930	hydroxyproline-rich glycoprotein family protein
Ghir_D05G013490	12.784	26.3153	1.11761	0.0376415	up	AT1G17730	vacuolar protein sorting 46.1
Ghir_D05G013560	3.23908	8.51133	1.48072	0.000138803	up	AT1G51700	DOF zinc finger protein 1
Ghir_D05G013830	30.4627	6.70946	-2.10115	0.00162573	down	AT3G13920	eukaryotic translation initiation factor 4A1
Ghir_D05G014280	0.0181773	0.131664	2.82214	0.0458737	up	AT1G17455	ELF4-like 4
Ghir_D05G014410	29.0749	12.5638	-1.12858	3.87023e-05	down	AT3G14310	pectin methylesterase 3
Ghir_D05G014500	2.78619	5.3019	1.0024	0.0224069	up	AT1G51680	4-coumarate:CoA ligase 1
Ghir_D05G014560	0.599899	1.93452	1.79345	0.0357355	up	AT5G43150	unknown protein; FUNCTIONS IN: molecular_function unknown; INVOLVED IN: biological_process unknown; LOCATED IN: mitochondrion; EXPRESSED IN: 22 plant structures; EXPRESSED DURING: 13 growth stages; Has 1807 Blast hits to 1807 proteins in 277 species: Archae - 0; Bacteria - 0; Metazoa - 736; Fungi - 347; Plants - 385; Viruses - 0; Other Eukaryotes - 339 (source: NCBI BLink).
Ghir_D05G014600	13.5368	4.93055	-1.38512	5.27026e-07	down	AT1G31330	photosystem I subunit F
Ghir_D05G014820	7.98304	15.613	1.04401	0.00314879	up	AT2G35150	EXORDIUM like 1
Ghir_D05G015020	8.67594	3.07434	-1.44569	0.00312562	down	AT3G14420	Aldolase-type TIM barrel family protein
Ghir_D05G015130	0.0209703	0.527561	4.64131	0.0332176	up	AT5G46240	potassium channel in Arabidopsis thaliana 1
Ghir_D05G015230	0.466034	9.2343	4.41518	0.00335664	up	AT1G06475	unknown protein; Has 35333 Blast hits to 34131 proteins in 2444 species: Archae - 798; Bacteria - 22429; Metazoa - 974; Fungi - 991; Plants - 531; Viruses - 0; Other Eukaryotes - 9610 (source: NCBI BLink).
Ghir_D05G015510	3.82642	23.6633	2.7207	7.88092e-13	up	AT1G29670	GDSL-like Lipase/Acylhydrolase superfamily protein
Ghir_D05G015680	35.3369	81.6386	1.28723	7.709e-05	up	AT5G45775	Ribosomal L5P family protein
Ghir_D05G016080	0.236124	1.43759	2.69594	5.04622e-05	up	AT5G45960	GDSL-like Lipase/Acylhydrolase superfamily protein
Ghir_D05G016260	18.5731	177.25	3.32899	5.4432e-20	up	AT2G33850	unknown protein; FUNCTIONS IN: molecular_function unknown; INVOLVED IN: biological_process unknown; LOCATED IN: endomembrane system; EXPRESSED IN: 17 plant structures; EXPRESSED DURING: 9 growth stages; BEST Arabidopsis thaliana protein match is: unknown protein (TAIR:AT1G28400.1); Has 3053 Blast hits to 2119 proteins in 133 species: Archae - 6; Bacteria - 52; Metazoa - 135; Fungi - 96; Plants - …
Ghir_D05G016410	1.26395	4.7634	1.99918	0.0342403	up	AT2G33800	Ribosomal protein S5 family protein
Ghir_D05G016600	0.481489	0.005203	-6.24724	0.0205208	down	AT1G61100	disease resistance protein (TIR class), putative
Ghir_D05G016770	0.151982	0.72277	2.30804	0.0262246	up
Ghir_D05G016790	0	7.44173	27.4356	3.69636e-09	up	AT4G21580	oxidoreductase, zinc-binding dehydrogenase family protein
Ghir_D05G016960	5.8661	2.7169	-1.03389	8.86144e-06	down	AT1G61350	ARM repeat superfamily protein
Ghir_D05G017600	0.221058	2.61088	3.61541	1.36244e-09	up	AT2G32510	mitogen-activated protein kinase kinase kinase 17
Ghir_D05G017760	2.01359	0.215035	-3.15826	0.0213872	down	AT1G12020	unknown protein; BEST Arabidopsis thaliana protein match is: unknown protein (TAIR:AT1G62422.1); Has 89 Blast hits to 88 proteins in 16 species: Archae - 0; Bacteria - 0; Metazoa - 0; Fungi - 0; Plants - 87; Viruses - 0; Other Eukaryotes - 2 (source: NCBI BLink).
Ghir_D05G018520	22.8145	73.8859	1.77433	0.00699322	up	AT1G20440	cold-regulated 47
Ghir_D05G018920	0.921598	0	-25.7484	0.000171481	down
Ghir_D05G019410	0.227318	1.29403	2.59979	2.87101e-07	up	AT1G75450	cytokinin oxidase 5
Ghir_D05G019480	0.282957	2.53417	3.2367	0.000482034	up	AT1G35180	TRAM, LAG1 and CLN8 (TLC) lipid-sensing domain containing protein
Ghir_D05G019720	0.357469	0.09816	-1.77507	1.00074e-05	down	AT5G63380	AMP-dependent synthetase and ligase family protein
Ghir_D05G020090	0.666021	0.209987	-1.57529	0.0191457	down	AT5G42610	Protein of unknown function (DUF607)
Ghir_D05G020110	0.0955513	0.991407	3.41949	0.000159004	up	AT1G75050	Pathogenesis-related thaumatin superfamily protein
Ghir_D05G020120	2.83277	9.18174	1.78912	0.0377318	up	AT1G19300	Nucleotide-diphospho-sugar transferases superfamily protein
Ghir_D05G020460	1.51779	10.7863	2.92661	4.35318e-05	up	AT2G26530	Protein of unknown function (DUF1645)
Ghir_D05G020560	0	0.100675	7.43019	9.5244e-05	up	AT2G26560	phospholipase A 2A
Ghir_D05G020800	1.78823	0.186799	-3.11869	4.77689e-07	down	AT5G67060	basic helix-loop-helix (bHLH) DNA-binding superfamily protein
Ghir_D05G020950	0.98233	3.84186	2.06122	2.30287e-11	up	AT4G06534	unknown protein; FUNCTIONS IN: molecular_function unknown; INVOLVED IN: biological_process unknown; LOCATED IN: endomembrane system; Has 22 Blast hits to 22 proteins in 8 species: Archae - 0; Bacteria - 0; Metazoa - 0; Fungi - 0; Plants - 22; Viruses - 0; Other Eukaryotes - 0 (source: NCBI BLink).
Ghir_D05G021340	1.88486	0.372042	-2.27551	2.31781e-06	down	AT5G01075	Glycosyl hydrolase family 35 protein
Ghir_D05G021360	0.426454	1.18645	1.56309	0.0370344	up	AT3G49940	LOB domain-containing protein 38
Ghir_D05G021630	0.420265	0.142218	-1.48183	0.0113895	down
Ghir_D05G022050	0.369821	5.58955	3.9949	1.40762e-05	up	AT5G64460	Phosphoglycerate mutase family protein
Ghir_D05G022520	0.23125	1.64589	2.89607	0.0110255	up	AT1G02070	unknown protein; BEST Arabidopsis thaliana protein match is: unknown protein (TAIR:AT3G60520.1); Has 98 Blast hits to 98 proteins in 13 species: Archae - 0; Bacteria - 0; Metazoa - 0; Fungi - 0; Plants - 98; Viruses - 0; Other Eukaryotes - 0 (source: NCBI BLink).
Ghir_D05G022590	2.44762	0.693497	-1.74529	0.019789	down	AT1G28220	purine permease 3
Ghir_D05G022650	3.5152	0.893984	-1.90688	0.000195312	down	AT1G72210	basic helix-loop-helix (bHLH) DNA-binding superfamily protein
Ghir_D05G023090	130.252	260.085	1.0796	0.0151272	up	AT1G35720	annexin 1
Ghir_D05G023620	0.23258	0.027668	-2.90081	0.000395658	down	AT1G77700	Pathogenesis-related thaumatin superfamily protein
Ghir_D05G023650	28.754	63.1703	1.21229	0.0090953	up	AT4G08230	glycine-rich protein
Ghir_D05G023720	0.651854	0.0170463	-4.98801	0.0310868	down	AT1G44835	YbaK/aminoacyl-tRNA synthetase-associated domain
Ghir_D05G023730	0.341015	3.75771	3.55071	0.000536292	up	AT1G21910	Integrase-type DNA-binding superfamily protein
Ghir_D05G024430	0.180612	2.06842	3.60291	0.00337647	up	AT5G44860	unknown protein; BEST Arabidopsis thaliana protein match is: unknown protein (TAIR:AT4G19950.1); Has 233 Blast hits to 227 proteins in 25 species: Archae - 0; Bacteria - 13; Metazoa - 1; Fungi - 0; Plants - 216; Viruses - 0; Other Eukaryotes - 3 (source: NCBI BLink).
Ghir_D05G024950	1.51958	3.51406	1.30093	1.37979e-06	up	AT5G42440	Protein kinase superfamily protein
Ghir_D05G025040	0.805442	3.04252	2.01212	0.00914582	up	AT1G71697	choline kinase 1
Ghir_D05G025170	0	0.0117507	4.7445	0.0180055	up	AT5G48100	Laccase/Diphenol oxidase family protein
Ghir_D05G025270	14.2953	1.96813	-2.80035	0.0162633	down	AT4G10340	light harvesting complex of photosystem II 5
Ghir_D05G025340	0.00484467	0.139715	4.97507	0.0361007	up	AT1G52190	Major facilitator superfamily protein
Ghir_D05G025500	0.926399	2.29885	1.38007	0.02811	up	AT1G13460	Protein phosphatase 2A regulatory B subunit family protein
Ghir_D05G025600	1.60934	6.40074	2.08755	0.0157527	up	AT5G47850	CRINKLY4 related 4
Ghir_D05G025730	0.118616	2.2976	4.31099	0.0191976	up	AT1G71450	Integrase-type DNA-binding superfamily protein
Ghir_D05G025910	0.00514433	0.063752	3.78524	0.0256805	up	AT4G35790	phospholipase D delta
Ghir_D05G026090	1.86009	0.0100617	-7.2673	0.000887761	down	AT1G75660	5'-3' exoribonuclease 3
Ghir_D05G026370	1.00652	6.38331	2.78667	0.00962267	up	AT5G47910	respiratory burst oxidase homologue D
Ghir_D05G026450	0.113741	1.09413	3.34863	1.09497e-05	up	AT1G75030	thaumatin-like protein 3
Ghir_D05G026470	0.135141	0.000200333	-6.87699	0.038916	down	AT1G13570	F-box/RNI-like superfamily protein
Ghir_D05G027070	0.340324	2.45287	2.95295	0.00244975	up	AT4G24380	INVOLVED IN: 10-formyltetrahydrofolate biosynthetic process, folic acid and derivative biosynthetic process; EXPRESSED IN: 24 plant structures; EXPRESSED DURING: 15 growth stages; CONTAINS InterPro DOMAIN/s: Serine hydrolase (InterPro:IPR005645); BEST Arabidopsis thaliana protein match is: alpha/beta-Hydrolases superfamily protein (TAIR:AT5G65400.1); Has 30201 Blast hits to 17322 proteins in 780 …
Ghir_D05G027290	26.7539	59.9985	1.24966	0.000884784	up	AT4G08685	Pollen Ole e 1 allergen and extensin family protein
Ghir_D05G027810	0.022173	2.40037	6.7235	0.000113947	up	AT1G29670	GDSL-like Lipase/Acylhydrolase superfamily protein
Ghir_D05G027850	0.54061	1.85721	1.86396	2.34648e-05	up	AT5G47850	CRINKLY4 related 4
Ghir_D05G028060	5.64643	0.0553713	-6.53038	0.00030122	down	AT1G71980	Protease-associated (PA) RING/U-box zinc finger family protein
Ghir_D05G028210	0.024324	0.384711	3.93238	4.68962e-11	up	AT1G33800	Protein of unknown function (DUF579)
Ghir_D05G028330	2.88169	47.0614	4.12064	0.000144479	up	AT3G56400	WRKY DNA-binding protein 70
Ghir_D05G028360	3.67572	9.31452	1.41549	0.000917929	up
Ghir_D05G028430	0.463252	2.32516	2.4008	0.00571587	up	AT3G56360	unknown protein; FUNCTIONS IN: molecular_function unknown; INVOLVED IN: biological_process unknown; LOCATED IN: chloroplast; EXPRESSED IN: 24 plant structures; EXPRESSED DURING: 15 growth stages; BEST Arabidopsis thaliana protein match is: unknown protein (TAIR:AT5G05250.1); Has 45 Blast hits to 45 proteins in 13 species: Archae - 0; Bacteria - 0; Metazoa - 0; Fungi - 0; Plants - 45; Viruses - 0;…
Ghir_D05G028480	0.232808	1.77951	3.031	1.40475e-05	up	AT5G24080	Protein kinase superfamily protein
Ghir_D05G028490	0.010856	0.0647797	2.57999	0.0491301	up	AT5G24080	Protein kinase superfamily protein
Ghir_D05G028700	6.398	0.003457	-10.3979	0.00771839	down	AT5G57655	xylose isomerase family protein
Ghir_D05G029170	12.5339	5.89992	-1.00635	0.0482332	down	AT1G73100	SU(VAR)3-9 homolog 3
Ghir_D05G029490	1.59855	0	-25.3074	0.000240469	down	AT4G40045	unknown protein; Has 30201 Blast hits to 17322 proteins in 780 species: Archae - 12; Bacteria - 1396; Metazoa - 17338; Fungi - 3422; Plants - 5037; Viruses - 0; Other Eukaryotes - 2996 (source: NCBI BLink).
Ghir_D05G029760	0.0137233	0.092164	2.5375	0.0405564	up	AT5G02420	unknown protein; Has 90 Blast hits to 90 proteins in 10 species: Archae - 0; Bacteria - 0; Metazoa - 0; Fungi - 0; Plants - 90; Viruses - 0; Other Eukaryotes - 0 (source: NCBI BLink).
Ghir_D05G030270	2.70402	32.2418	3.67267	0.0126497	up	AT3G54810	Plant-specific GATA-type zinc finger transcription factor family protein
Ghir_D05G031080	2.8779	6.24699	1.20294	0.00011159	up	AT2G40000	ortholog of sugar beet HS1 PRO-1 2
Ghir_D05G031170	0.267767	0.0540083	-2.25805	0.0224885	down	AT5G05390	laccase 12
Ghir_D05G032440	0.202711	25.0825	7.05693	1.13295e-06	up	AT5G57560	Xyloglucan endotransglucosylase/hydrolase family protein
Ghir_D05G032850	8.91449	17.8835	1.09358	0.00059048	up	AT5G19120	Eukaryotic aspartyl protease family protein
Ghir_D05G032870	2.49858	47.3236	4.33658	1.69259e-07	up	AT3G03280	unknown protein; FUNCTIONS IN: molecular_function unknown; INVOLVED IN: N-terminal protein myristoylation; LOCATED IN: cellular_component unknown; BEST Arabidopsis thaliana protein match is: unknown protein (TAIR:AT5G17350.1); Has 137 Blast hits to 137 proteins in 11 species: Archae - 0; Bacteria - 0; Metazoa - 0; Fungi - 0; Plants - 137; Viruses - 0; Other Eukaryotes - 0 (source: NCBI BLink).
Ghir_D05G033160	2.55846	53.6711	4.49338	7.3834e-06	up	AT1G70170	matrix metalloproteinase
Ghir_D05G033620	1.82658	0.00883633	-7.39147	1.44095e-05	down	AT3G23910	BEST Arabidopsis thaliana protein match is: RNA-directed DNA polymerase (reverse transcriptase)-related family protein (TAIR:AT3G24255.2); Has 562 Blast hits to 532 proteins in 147 species: Archae - 28; Bacteria - 51; Metazoa - 157; Fungi - 82; Plants - 85; Viruses - 6; Other Eukaryotes - 153 (source: NCBI BLink).
Ghir_D05G034060	6.42538	2.83332	-1.09032	0.000392293	down	AT3G12930	Lojap-related protein
Ghir_D05G034080	3.66348	1.47778	-1.24138	0.0115379	down	AT3G12920	SBP (S-ribonuclease binding protein) family protein
Ghir_D05G034630	0	0.047861	21.634	3.09818e-07	up	AT1G53440	Leucine-rich repeat transmembrane protein kinase
Ghir_D05G035530	12.894	147.425	3.61369	0.0046493	up	AT3G15210	ethylene responsive element binding factor 4
Ghir_D05G035760	0.710411	0	-10.4544	0.0282681	down	AT1G62930	Tetratricopeptide repeat (TPR)-like superfamily protein
Ghir_D05G036830	113.919	54.1149	-1.0001	0.00017624	down	AT3G54470	uridine 5'-monophosphate synthase / UMP synthase (PYRE-F) (UMPS)
Ghir_D05G036850	0.161791	0.525006	1.78883	0.00342422	up	AT4G27220	NB-ARC domain-containing disease resistance protein
Ghir_D05G036860	3.75046	15.7526	2.15465	5.489e-06	up	AT5G54400	S-adenosyl-L-methionine-dependent methyltransferases superfamily protein
Ghir_D05G037800	0.033521	1.07801	4.9656	2.34884e-10	up	AT3G20395	RING/U-box superfamily protein
Ghir_D05G037810	1.08065	5.61798	2.45208	1.0485e-19	up	AT3G20395	RING/U-box superfamily protein
Ghir_D05G038140	5.70066	0.879917	-2.58902	0.0113895	down	AT4G26910	Dihydrolipoamide succinyltransferase
Ghir_D05G039240	6.53084	16.2193	1.39504	0.0374526	up	AT3G13310	Chaperone DnaJ-domain superfamily protein
Ghir_D06G000280	0.216	0.770846	1.90252	0.00315942	up	AT1G19940	glycosyl hydrolase 9B5
Ghir_D06G000290	2.71855	8.0726	1.6479	0.00566624	up	AT1G19940	glycosyl hydrolase 9B5
Ghir_D06G000540	5.32688	1.09321	-2.21147	0.000108048	down	AT1G75430	BEL1-like homeodomain 11
Ghir_D06G000730	1.23897	0.168148	-2.78101	0.000157833	down	AT1G47270	tubby like protein 6
Ghir_D06G000850	0.848834	13.0393	4.05668	1.4535e-10	up	AT4G36660	Protein of unknown function (DUF1195)
Ghir_D06G001120	0.0544023	11.9517	7.83659	4.1761e-05	up	AT5G42650	allene oxide synthase
Ghir_D06G001150	9.75478	2.3559	-1.97627	0.00105301	down	AT2G26490	Transducin/WD40 repeat-like superfamily protein
Ghir_D06G001500	2.18026	0.449504	-2.21395	3.49879e-08	down	AT5G42750	BRI1 kinase inhibitor 1
Ghir_D06G001600	0	7.88826	40.6687	1.49545e-36	up	AT5G42890	sterol carrier protein 2
Ghir_D06G001960	6.28387	19.8018	1.74645	0.0437243	up	AT4G37260	myb domain protein 73
Ghir_D06G002110	0.0771187	5.17653	6.13573	5.65907e-08	up	AT4G37540	LOB domain-containing protein 39
Ghir_D06G002120	0.534572	2.36521	2.23175	0.0051799	up	AT1G27730	salt tolerance zinc finger
Ghir_D06G002140	0.223794	0.004314	-5.69189	0.0249339	down	AT4G33880	ROOT HAIR DEFECTIVE 6-LIKE 2
Ghir_D06G002170	0.402421	1.28406	1.77153	1.30189e-05	up	AT3G01400	ARM repeat superfamily protein
Ghir_D06G002270	1.40488	7.1363	2.4139	0.00062863	up	AT3G49780	phytosulfokine 4 precursor
Ghir_D06G002280	1.36001	6.99584	2.43792	0.000113949	up	AT4G10810	unknown protein; FUNCTIONS IN: molecular_function unknown; INVOLVED IN: biological_process unknown; LOCATED IN: chloroplast; EXPRESSED IN: 23 plant structures; EXPRESSED DURING: 15 growth stages; BEST Arabidopsis thaliana protein match is: unknown protein (TAIR:AT4G24026.1); Has 1807 Blast hits to 1807 proteins in 277 species: Archae - 0; Bacteria - 0; Metazoa - 736; Fungi - 347; Plants - 385; Vi…
Ghir_D06G002750	0.196288	1.41619	2.92249	4.49406e-11	up	AT1G58340	MATE efflux family protein
Ghir_D06G003100	5.70997	33.1443	2.60579	0.000136271	up	AT5G67150	HXXXD-type acyl-transferase family protein
Ghir_D06G003520	0.832723	12.6561	4.00921	7.18928e-11	up	AT1G72240	unknown protein; BEST Arabidopsis thaliana protein match is: unknown protein (TAIR:AT1G22470.1); Has 65 Blast hits to 63 proteins in 13 species: Archae - 0; Bacteria - 0; Metazoa - 1; Fungi - 0; Plants - 64; Viruses - 0; Other Eukaryotes - 0 (source: NCBI BLink).
Ghir_D06G003620	2.50393	10.666	2.16835	3.47775e-43	up	AT1G22330	RNA-binding (RRM/RBD/RNP motifs) family protein
Ghir_D06G004030	0.571281	0.001727	-8.06179	0.00318021	down	AT4G08690	Sec14p-like phosphatidylinositol transfer family protein
Ghir_D06G004410	0.226844	1.24447	2.49483	0.0319724	up	AT1G13700	6-phosphogluconolactonase 1
Ghir_D06G004590	0.965754	48.2505	5.7125	4.54235e-27	up	AT4G08300	nodulin MtN21 /EamA-like transporter family protein
Ghir_D06G004650	6.80097	0.839735	-2.95277	0.000108763	down	AT1G77620	P-loop containing nucleoside triphosphate hydrolases superfamily protein
Ghir_D06G004800	13.9075	35.0584	1.41028	0.00330321	up	AT3G57040	response regulator 9
Ghir_D06G004810	5.42372	2.34748	-1.12551	0.0182155	down	AT1G77490	thylakoidal ascorbate peroxidase
Ghir_D06G004830	0.290281	1.54608	2.48421	0.0484439	up	AT1G11040	HSP40/DnaJ peptide-binding protein
Ghir_D06G004950	13.8908	1.34518	-3.28149	0.00966405	down	AT4G32551	LisH dimerisation motif;WD40/YVTN repeat-like-containing domain
Ghir_D06G005000	0.708497	0.307054	-1.12184	0.012807	down	AT1G09900	Pentatricopeptide repeat (PPR-like) superfamily protein
Ghir_D06G005600	0.647632	4.63399	2.87614	0.0473535	up	AT5G35200	ENTH/ANTH/VHS superfamily protein
Ghir_D06G006220	0.0850533	1.07042	3.73872	0.0025402	up	AT2G18660	plant natriuretic peptide A
Ghir_D06G006390	0.196212	0	-22.3434	3.30716e-05	down	AT5G25510	Protein phosphatase 2A regulatory B subunit family protein
Ghir_D06G006620	1.0817	3.42925	1.74055	3.61892e-06	up	AT3G24520	heat shock transcription factor C1
Ghir_D06G007470	0.151634	0.483988	1.73272	0.00678019	up	AT5G57620	myb domain protein 36
Ghir_D06G007630	0.622076	0	-10.9773	0.00359156	down	AT3G13690	Protein kinase protein with adenine nucleotide alpha hydrolases-like domain
Ghir_D06G007990	9.70854	101.193	3.47151	2.90824e-05	up	AT4G29780	unknown protein; BEST Arabidopsis thaliana protein match is: unknown protein (TAIR:AT5G12010.1); Has 945 Blast hits to 944 proteins in 87 species: Archae - 0; Bacteria - 0; Metazoa - 519; Fungi - 43; Plants - 365; Viruses - 0; Other Eukaryotes - 18 (source: NCBI BLink).
Ghir_D06G008380	2.16821	0.538609	-1.89681	0.0177205	down
Ghir_D06G008570	5.0249	52.6655	3.47759	0.000643431	up	AT1G19210	Integrase-type DNA-binding superfamily protein
Ghir_D06G008740	0.172946	2.07605	3.63261	3.56501e-08	up	AT4G33180	alpha/beta-Hydrolases superfamily protein
Ghir_D06G008810	0.153408	8.37954	5.82614	0.00078544	up	AT1G19210	Integrase-type DNA-binding superfamily protein
Ghir_D06G009110	0.217014	0.894486	2.10137	0.000681431	up	AT5G14750	myb domain protein 66
Ghir_D06G009710	22.8375	8.73939	-1.31172	0.00164837	down	AT2G25970	KH domain-containing protein
Ghir_D06G009900	9.69774	23.1167	1.33584	0.00844713	up	AT5G25940	early nodulin-related
Ghir_D06G010230	6.42469	2.61364	-1.22913	0.0191976	down	AT2G25810	tonoplast intrinsic protein 4;1
Ghir_D06G010240	0.48664	0.182777	-1.3461	0.00121368	down	AT1G67280	Glyoxalase/Bleomycin resistance protein/Dioxygenase superfamily protein
Ghir_D06G010590	19.4907	66.7036	1.86384	0.00665888	up	AT2G32060	Ribosomal protein L7Ae/L30e/S12e/Gadd45 family protein
Ghir_D06G010680	2.32594	5.21391	1.23657	0.00295256	up	AT2G24220	purine permease 5
Ghir_D06G010780	0.397391	0.0418167	-3.11498	0.0321029	down	AT5G11170	DEAD/DEAH box RNA helicase family protein
Ghir_D06G010840	0.1649	0.564563	1.81445	1.50735e-07	up	AT5G25390	Integrase-type DNA-binding superfamily protein
Ghir_D06G011140	3.05872	6.54092	1.18221	4.58778e-05	up	AT5G11000	Plant protein of unknown function (DUF868)
Ghir_D06G011180	0.807813	0	-25.2064	5.07019e-11	down	AT4G31880	LOCATED IN: cytosol; EXPRESSED IN: 24 plant structures; EXPRESSED DURING: 14 growth stages; BEST Arabidopsis thaliana protein match is: Tudor/PWWP/MBT superfamily protein (TAIR:AT1G15940.1).
Ghir_D06G011470	0.014171	0.189983	3.60246	0.00147198	up	AT5G10770	Eukaryotic aspartyl protease family protein
Ghir_D06G011740	15.7932	0.847412	-4.14353	3.74071e-12	down	AT2G24520	H(+)-ATPase 5
Ghir_D06G011790	1.01987	0.165561	-2.53985	0.00558679	down	AT4G31370	FASCICLIN-like arabinogalactan protein 5 precursor
Ghir_D06G012110	5.27261	13.4355	1.43083	0.00196738	up	AT1G55260	Bifunctional inhibitor/lipid-transfer protein/seed storage 2S albumin superfamily protein
Ghir_D06G012210	0.529059	0.024765	-4.26709	0.044271	down	AT3G57880	Calcium-dependent lipid-binding (CaLB domain) plant phosphoribosyltransferase family protein
Ghir_D06G012460	3.11515	1.39785	-1.08376	0.000333047	down	AT1G71695	Peroxidase superfamily protein
Ghir_D06G013090	1.2593	0.0840043	-3.80215	0.00578327	down	AT1G16780	Inorganic H pyrophosphatase family protein
Ghir_D06G013600	0.0111113	0.089382	2.95778	0.000114034	up	AT1G11410	S-locus lectin protein kinase family protein
Ghir_D06G014140	0.0126607	0.101927	3.14624	0.00962357	up	AT5G53750	CBS domain-containing protein
Ghir_D06G014500	10.1125	50.3486	2.39963	0.000709539	up	AT5G44210	erf domain protein 9
Ghir_D06G014930	0	2.91438	9.51102	4.80321e-06	up
Ghir_D06G015030	0.0879293	0.433552	2.3954	0.00505484	up	AT2G42760	unknown protein; CONTAINS InterPro DOMAIN/s: Protein of unknown function DUF1685 (InterPro:IPR012881); Has 170 Blast hits to 164 proteins in 34 species: Archae - 0; Bacteria - 1; Metazoa - 26; Fungi - 10; Plants - 107; Viruses - 0; Other Eukaryotes - 26 (source: NCBI BLink).
Ghir_D06G015130	2.29693	0.001492	-9.15955	0.000151245	down	AT5G45700	Haloacid dehalogenase-like hydrolase (HAD) superfamily protein
Ghir_D06G015680	10.9015	4.06795	-1.34117	0.00493198	down	AT5G46170	F-box family protein
Ghir_D06G015710	0.268451	4.12283	4.04439	0.0409088	up
Ghir_D06G015970	3.19934	0.354455	-3.09669	0.0469452	down	AT1G31330	photosystem I subunit F
Ghir_D06G016310	0.886292	0.000395333	-10.0622	6.91615e-05	down	AT3G14075	Mono-/di-acylglycerol lipase, N-terminal;Lipase, class 3
Ghir_D06G016340	0.393563	2.40555	2.67222	0.00373893	up
Ghir_D06G017330	0.070791	0.63678	3.14738	0.000217253	up	AT3G25070	RPM1 interacting protein 4
Ghir_D06G017420	0.0340703	0	-4.46559	0.0379306	down
Ghir_D06G017700	0.110295	4.80377	5.49052	0.00326892	up	AT2G35760	Uncharacterised protein family (UPF0497)
Ghir_D06G018140	0.54595	1.40369	1.41928	0.0336106	up	AT2G40410	Staphylococcal nuclease homologue
Ghir_D06G018210	0.0305833	1.46414	5.65638	1.96207e-06	up	AT2G40370	laccase 5
Ghir_D06G018220	0.0230957	1.61095	6.23645	2.78931e-07	up	AT2G40370	laccase 5
Ghir_D06G018380	5.51371	1.41842	-1.88225	0.000782709	down	AT3G11110	RING/U-box superfamily protein
Ghir_D06G018640	1.80247	3.53738	1.07085	0.0168561	up	AT3G11320	Nucleotide-sugar transporter family protein
Ghir_D06G018780	13.4162	3.08465	-2.05511	0.00121775	down	AT2G39730	rubisco activase
Ghir_D06G018850	0.0170193	0	-4.90117	0.0420805	down	AT2G39690	Protein of unknown function, DUF547
Ghir_D06G020020	6.02405	12.3199	1.10356	0.00137983	up	AT5G04200	metacaspase 9
Ghir_D06G020220	5.17542	28.4391	2.54854	1.399e-05	up	AT1G68620	alpha/beta-Hydrolases superfamily protein
Ghir_D06G020250	0	3.77941	26.9654	9.78385e-29	up	AT2G02990	ribonuclease 1
Ghir_D06G020500	0.0176657	0.314622	4.03758	0.00589815	up	AT5G36110	cytochrome P450, family 716, subfamily A, polypeptide 1
Ghir_D06G021180	3.69428	0.790765	-2.1375	0.00574278	down	AT3G15680	Ran BP2/NZF zinc finger-like superfamily protein
Ghir_D06G021220	0.00311633	0.121473	5.22789	1.339e-05	up	AT1G15460	HCO3- transporter family
Ghir_D06G022110	0.06556	0.405273	2.6362	0.00390171	up	AT1G30280	Chaperone DnaJ-domain superfamily protein
Ghir_D06G022910	0.559511	0.00274267	-7.22607	0.0409088	down	AT1G61240	Protein of unknown function (DUF707)
Ghir_D06G022940	3.44381	1.10652	-1.5604	0.0103812	down	AT5G57580	Calmodulin-binding protein
Ghir_D06G023000	0.105405	0.790659	2.98598	0.0142539	up	AT1G61690	phosphoinositide binding
Ghir_D06G023070	5.5437	1.44766	-1.8632	2.5897e-09	down	AT1G11600	cytochrome P450, family 77, subfamily B, polypeptide 1
Ghir_D06G023810	0.178374	3.28707	4.25248	0.00199947	up	AT4G31330	Protein of unknown function, DUF599
Ghir_D07G000060	2.83786	8.97715	1.76385	0.0178165	up	AT4G31290	ChaC-like family protein
Ghir_D07G000090	8.12374	2.07347	-1.88619	0.0190559	down	AT4G31120	SHK1 binding protein 1
Ghir_D07G000110	10.0855	2.374	-2.00443	0.0444142	down	AT4G31180	Class II aminoacyl-tRNA and biotin synthetases superfamily protein
Ghir_D07G000620	2.69796	1.21685	-1.06149	0.0323759	down	AT2G32230	proteinaceous RNase P 1
Ghir_D07G000890	0.979949	2.22468	1.25729	0.00102643	up	AT1G52140	unknown protein; BEST Arabidopsis thaliana protein match is: unknown protein (TAIR:AT3G16330.1); Has 114 Blast hits to 114 proteins in 15 species: Archae - 0; Bacteria - 0; Metazoa - 0; Fungi - 0; Plants - 114; Viruses - 0; Other Eukaryotes - 0 (source: NCBI BLink).
Ghir_D07G000940	0.315551	0.759206	1.33609	0.027889	up	AT4G29140	MATE efflux family protein
Ghir_D07G000980	22.8922	56.8791	1.38944	0.00914688	up
Ghir_D07G001530	1.15755	0.459285	-1.26389	0.00732344	down	AT2G06255	ELF4-like 3
Ghir_D07G001720	21.7832	45.7321	1.15025	0.00962357	up	AT1G74940	Protein of unknown function (DUF581)
Ghir_D07G001730	0.668494	30.0402	5.57009	0.000312495	up	AT1G19210	Integrase-type DNA-binding superfamily protein
Ghir_D07G001980	0.516965	2.17613	2.13881	0.0349033	up	AT1G72510	Protein of unknown function (DUF1677)
Ghir_D07G001990	1.43276	2.88186	1.08857	0.00195374	up	AT5G20650	copper transporter 5
Ghir_D07G002190	1.01414	13.3663	3.77367	0.0430487	up	AT5G12020	17.6 kDa class II heat shock protein
Ghir_D07G002340	0.185586	2.42839	3.73328	2.08634e-05	up	AT2G26040	PYR1-like 2
Ghir_D07G002610	0.62556	2.16466	1.86296	5.67783e-06	up	AT4G32870	Polyketide cyclase/dehydrase and lipid transport superfamily protein
Ghir_D07G002640	0.234907	0.0338607	-2.72026	0.000165085	down	AT2G25790	Leucine-rich receptor-like protein kinase family protein
Ghir_D07G002680	0.040521	5.21137	7.00715	0.00309214	up	AT4G28940	Phosphorylase superfamily protein
Ghir_D07G002820	10.1614	21.1607	1.13325	0.0159607	up	AT3G16080	Zinc-binding ribosomal protein family protein
Ghir_D07G003280	0	0.424279	8.91709	0.020829	up	AT4G32340	Tetratricopeptide repeat (TPR)-like superfamily protein
Ghir_D07G003490	0.574692	38.3839	6.17356	9.33805e-05	up	AT5G11070	unknown protein; Has 1807 Blast hits to 1807 proteins in 277 species: Archae - 0; Bacteria - 0; Metazoa - 736; Fungi - 347; Plants - 385; Viruses - 0; Other Eukaryotes - 339 (source: NCBI BLink).
Ghir_D07G003570	0.927561	0.375506	-1.21492	0.0304048	down	AT5G25190	Integrase-type DNA-binding superfamily protein
Ghir_D07G004390	0.176052	0.052239	-1.63244	0.0126301	down	AT5G35160	Endomembrane protein 70 protein family
Ghir_D07G004730	0.362841	0.0266023	-3.63941	0.0411324	down	AT3G47430	peroxin 11B
Ghir_D07G004900	2.66286	5.62228	1.17837	0.00443808	up	AT4G25150	HAD superfamily, subfamily IIIB acid phosphatase
Ghir_D07G004950	0.0417003	0.808411	4.34545	0.0134952	up	AT3G06530	ARM repeat superfamily protein
Ghir_D07G004970	0.107416	0.723144	2.82098	0.00011851	up	AT5G07580	Integrase-type DNA-binding superfamily protein
Ghir_D07G004980	14.2655	133.633	3.31556	5.95719e-11	up	AT5G51190	Integrase-type DNA-binding superfamily protein
Ghir_D07G005260	0.209641	0	-22.0212	2.51103e-06	down	AT5G61865	unknown protein; Has 30201 Blast hits to 17322 proteins in 780 species: Archae - 12; Bacteria - 1396; Metazoa - 17338; Fungi - 3422; Plants - 5037; Viruses - 0; Other Eukaryotes - 2996 (source: NCBI BLink).
Ghir_D07G005550	0.00755567	0.265653	5.15574	0.0286042	up	AT5G50770	hydroxysteroid dehydrogenase 6
Ghir_D07G006690	0.088159	5.48663	5.98903	0.0142162	up	AT3G21640	FKBP-type peptidyl-prolyl cis-trans isomerase family protein
Ghir_D07G007780	4.92869	1.38684	-1.76083	0.0224097	down	AT5G62600	ARM repeat superfamily protein
Ghir_D07G008050	0.660405	2.35536	1.90167	0.0274994	up	AT5G14700	NAD(P)-binding Rossmann-fold superfamily protein
Ghir_D07G008250	0.291379	1.38467	2.31584	0.00467642	up	AT2G04040	MATE efflux family protein
Ghir_D07G009050	0.218553	3.48006	4.08606	5.74873e-07	up	AT2G32210	unknown protein; BEST Arabidopsis thaliana protein match is: unknown protein (TAIR:AT2G32190.1); Has 214 Blast hits to 214 proteins in 21 species: Archae - 0; Bacteria - 0; Metazoa - 1; Fungi - 10; Plants - 203; Viruses - 0; Other Eukaryotes - 0 (source: NCBI BLink).
Ghir_D07G009060	24.4272	51.8403	1.15768	0.00399486	up	AT4G15000	Ribosomal L27e protein family
Ghir_D07G009160	0.564673	0.178116	-1.57642	0.0103886	down	AT1G79480	Carbohydrate-binding X8 domain superfamily protein
Ghir_D07G009350	0	1.17711	37.5009	2.23798e-09	up	AT3G21630	chitin elicitor receptor kinase 1
Ghir_D07G009380	0.0511753	0.75769	3.91192	0.000117817	up	AT1G05010	ethylene-forming enzyme
Ghir_D07G009390	0.153396	1.20602	3.05828	0.00020555	up	AT1G05010	ethylene-forming enzyme
Ghir_D07G010800	0.008262	0.11989	3.72355	0.0229755	up	AT2G29090	cytochrome P450, family 707, subfamily A, polypeptide 2
Ghir_D07G010810	0.198715	5.63266	4.90957	5.82852e-05	up	AT3G46620	zinc finger (C3HC4-type RING finger) family protein
Ghir_D07G010980	2.84128	0.829464	-1.70054	0.00024786	down	AT3G11340	UDP-Glycosyltransferase superfamily protein
Ghir_D07G011020	0.0763523	0.352747	2.22795	0.0490026	up	AT1G53540	HSP20-like chaperones superfamily protein
Ghir_D07G011270	0.0148083	0.20093	3.75348	2.46975e-05	up	AT2G28200	C2H2-type zinc finger family protein
Ghir_D07G011480	2.80929	18.6109	2.8121	5.66646e-06	up	AT2G27830	unknown protein; BEST Arabidopsis thaliana protein match is: unknown protein (TAIR:AT4G22758.1); Has 131 Blast hits to 131 proteins in 17 species: Archae - 0; Bacteria - 0; Metazoa - 0; Fungi - 0; Plants - 131; Viruses - 0; Other Eukaryotes - 0 (source: NCBI BLink).
Ghir_D07G011540	1.01264	0.267364	-1.8334	0.0050016	down	AT2G27770	Plant protein of unknown function (DUF868)
Ghir_D07G011720	0.712854	8.34888	3.6498	1.75828e-11	up	AT2G27580	A20/AN1-like zinc finger family protein
Ghir_D07G013080	0.01709	0.163589	3.15415	0.0349033	up	AT4G14190	Pentatricopeptide repeat (PPR) superfamily protein
Ghir_D07G013130	3.56657	54.496	3.99392	0.0220238	up	AT4G33550	Bifunctional inhibitor/lipid-transfer protein/seed storage 2S albumin superfamily protein
Ghir_D07G013540	0.454015	2.50726	2.54923	0.000223391	up
Ghir_D07G013730	0.0677907	0.477373	2.83809	0.0477573	up	AT2G32150	Haloacid dehalogenase-like hydrolase (HAD) superfamily protein
Ghir_D07G014390	0.290667	3.86319	3.82341	5.35949e-05	up	AT4G35580	NAC transcription factor-like 9
Ghir_D07G014410	0.0961203	0.205756	1.16081	0.0406883	up	AT2G46870	AP2/B3-like transcriptional factor family protein
Ghir_D07G014580	0.68699	0	-9.42606	0.00408725	down	AT3G24160	putative type 1 membrane protein
Ghir_D07G014970	0.0748517	2.99638	5.43009	0.00752887	up	AT2G46400	WRKY DNA-binding protein 46
Ghir_D07G015060	3.02022	6.23475	1.12449	0.000580196	up	AT3G61640	arabinogalactan protein 20
Ghir_D07G015110	0.045609	0.599207	3.80128	0.0281844	up	AT1G01490	Heavy metal transport/detoxification superfamily protein
Ghir_D07G015730	0.720651	0	-24.6369	0.000392293	down	AT2G45630	D-isomer specific 2-hydroxyacid dehydrogenase family protein
Ghir_D07G016070	5.47483	18.7275	1.84494	2.75387e-07	up	AT3G07390	auxin-responsive family protein
Ghir_D07G016780	0.0492727	103.752	10.9884	9.62747e-12	up
Ghir_D07G016980	0.578729	2.11029	1.94665	1.56129e-10	up	AT5G48850	Tetratricopeptide repeat (TPR)-like superfamily protein
Ghir_D07G017530	0.017733	0.262051	3.98174	0.0286305	up	AT4G13000	AGC (cAMP-dependent, cGMP-dependent and protein kinase C) kinase family protein
Ghir_D07G017620	0.959556	0.333209	-1.44049	0.0029314	down	AT5G48460	Actin binding Calponin homology (CH) domain-containing protein
Ghir_D07G017690	23.6579	6.10348	-1.8816	0.00218388	down	AT4G12800	photosystem I subunit l
Ghir_D07G017840	1.50838	0.454367	-1.65645	0.000191974	down	AT5G48300	ADP glucose pyrophosphorylase 1
Ghir_D07G018140	0.575262	4.36463	2.95684	0.0466493	up	AT2G04880	zinc-dependent activator protein-1
Ghir_D07G019020	8.39396	0.79255	-3.36154	0.00837031	down	AT5G38430	Ribulose bisphosphate carboxylase (small chain) family protein
Ghir_D07G019420	4.25948	9.37123	1.22129	0.0393438	up	AT5G38840	SMAD/FHA domain-containing protein
Ghir_D07G020040	3.77273	1.41933	-1.3421	0.0217342	down	AT1G79480	Carbohydrate-binding X8 domain superfamily protein
Ghir_D07G020660	0.33956	3.62623	3.51424	2.27803e-21	up	AT3G63380	ATPase E1-E2 type family protein / haloacid dehalogenase-like hydrolase family protein
Ghir_D07G020740	0.157217	1.44744	3.28276	3.54997e-06	up	AT3G13130	unknown protein; FUNCTIONS IN: molecular_function unknown; INVOLVED IN: biological_process unknown; LOCATED IN: endomembrane system; EXPRESSED IN: male gametophyte; Has 140 Blast hits to 132 proteins in 41 species: Archae - 2; Bacteria - 4; Metazoa - 29; Fungi - 20; Plants - 51; Viruses - 0; Other Eukaryotes - 34 (source: NCBI BLink).
Ghir_D07G020800	0	0.588844	28.9539	1.29531e-05	up	AT3G09010	Protein kinase superfamily protein
Ghir_D07G021500	0.11747	0.361369	1.70476	0.0458429	up	AT4G13000	AGC (cAMP-dependent, cGMP-dependent and protein kinase C) kinase family protein
Ghir_D07G022020	0.21144	2.70254	3.77221	0.0434332	up	AT3G04300	RmlC-like cupins superfamily protein
Ghir_D07G022230	0.397667	0	-26.9175	1.30859e-17	down	AT5G46050	peptide transporter 3
Ghir_D07G022600	1.10152	14.7469	3.80968	7.9504e-06	up	AT5G43700	AUX/IAA transcriptional regulator family protein
Ghir_D07G022620	4.88283	2.1212	-1.12136	0.000633956	down	AT3G54650	RNI-like superfamily protein
Ghir_D07G022680	2.98814	1.38536	-1.02841	1.98335e-05	down	AT5G64560	magnesium transporter 9
Ghir_D07G023170	0.142267	18.1644	7.05677	0.0023942	up	AT3G28860	ATP binding cassette subfamily B19
Ghir_D07G023510	0.480799	1.42037	1.67441	0.0238125	up	AT3G28210	zinc finger (AN1-like) family protein
Ghir_D07G023520	0.911856	0.399203	-1.11486	0.0449347	down	AT5G40140	RING/U-box superfamily protein with ARM repeat domain
Ghir_D07G023710	0.185118	0.001496	-6.25795	0.00317539	down	AT3G01480	cyclophilin 38
Ghir_D07G023890	0	0.706313	9.51022	0.0108648	up	AT5G40350	myb domain protein 24
Ghir_D07G024050	0.759433	0	-12.4594	3.25665e-05	down	AT5G40450	unknown protein; FUNCTIONS IN: molecular_function unknown; INVOLVED IN: biological_process unknown; LOCATED IN: chloroplast, plasma membrane; EXPRESSED IN: 24 plant structures; EXPRESSED DURING: 13 growth stages; Has 30201 Blast hits to 17322 proteins in 780 species: Archae - 12; Bacteria - 1396; Metazoa - 17338; Fungi - 3422; Plants - 5037; Viruses - 0; Other Eukaryotes - 2996 (source: NCBI BLin…
Ghir_D07G024110	10.4062	4.21396	-1.23021	4.91758e-07	down	AT2G16890	UDP-Glycosyltransferase superfamily protein
Ghir_D07G024370	0.469069	0.00371233	-6.39973	0.0290368	down	AT3G26020	Protein phosphatase 2A regulatory B subunit family protein
Ghir_D07G024400	16.657	7.18872	-1.14408	0.00484656	down	AT1G13440	glyceraldehyde-3-phosphate dehydrogenase C2
Ghir_D07G024900	0.252204	2.32416	3.28733	0.0336048	up	AT5G13200	GRAM domain family protein
Ghir_D07G025210	0.249516	0.679298	1.51792	0.0126905	up	AT5G24590	TCV-interacting protein
Ghir_D08G000160	3.32334	12.3857	1.98549	0.0262299	up	AT5G60680	Protein of unknown function, DUF584
Ghir_D08G000450	0.115364	0.581078	2.41403	6.16063e-10	up	AT5G59960	unknown protein; FUNCTIONS IN: molecular_function unknown; INVOLVED IN: biological_process unknown; LOCATED IN: nucleus; EXPRESSED IN: 24 plant structures; EXPRESSED DURING: 15 growth stages; Has 30201 Blast hits to 17322 proteins in 780 species: Archae - 12; Bacteria - 1396; Metazoa - 17338; Fungi - 3422; Plants - 5037; Viruses - 0; Other Eukaryotes - 2996 (source: NCBI BLink).
Ghir_D08G000630	2.76458	19.0473	2.85121	0.0483604	up	AT1G07400	HSP20-like chaperones superfamily protein
Ghir_D08G000880	60.2348	162.278	1.51444	0.00308738	up	AT3G44590	60S acidic ribosomal protein family
Ghir_D08G000900	0.0178983	2.92341	7.18577	1.3086e-08	up	AT2G27690	cytochrome P450, family 94, subfamily C, polypeptide 1
Ghir_D08G001050	3.7989	12.2234	1.75788	0.000643431	up	AT3G44380	Late embryogenesis abundant (LEA) hydroxyproline-rich glycoprotein family
Ghir_D08G001060	1.87592	3.94057	1.15507	0.0107743	up
Ghir_D08G001790	3.4348	0.964159	-1.75505	0.00463892	down	AT5G13020	Emsy N Terminus (ENT)/ plant Tudor-like domains-containing protein
Ghir_D08G002730	0	15.2457	29.2583	2.61604e-07	up	AT1G51060	histone H2A 10
Ghir_D08G002900	1.95891	5.30777	1.53804	0.0113729	up	AT4G25810	xyloglucan endotransglycosylase 6
Ghir_D08G003280	0.287867	0.00895	-4.58421	0.00015431	down	AT1G55580	GRAS family transcription factor
Ghir_D08G003410	2.82282	7.37122	1.4675	1.26439e-05	up	AT3G12630	A20/AN1-like zinc finger family protein
Ghir_D08G004260	0.126186	1.55145	3.67137	0.0107938	up	AT1G13280	allene oxide cyclase 4
Ghir_D08G004440	0.127323	1.43785	3.58713	0.00844515	up	AT1G66120	AMP-dependent synthetase and ligase family protein
Ghir_D08G004890	0.921075	1.98997	1.1792	0.00737364	up	AT4G15800	ralf-like 33
Ghir_D08G005920	0.13828	0.578841	2.15644	0.00475907	up	AT1G77760	nitrate reductase 1
Ghir_D08G006420	0.589748	2.13731	1.92477	0.016506	up	AT3G60280	uclacyanin 3
Ghir_D08G006810	1.06571	0.319509	-1.65489	0.00834186	down	AT2G30580	DREB2A-interacting protein 2
Ghir_D08G006830	0.009373	0.37609	5.45297	0.00168978	up	AT2G30550	alpha/beta-Hydrolases superfamily protein
Ghir_D08G006850	0.155209	7.9102	5.77389	2.31813e-18	up	AT5G43700	AUX/IAA transcriptional regulator family protein
Ghir_D08G007050	0.211353	0.0504907	-1.97203	0.01234	down	AT3G18670	Ankyrin repeat family protein
Ghir_D08G007100	1.5971	0.44878	-1.76129	8.74481e-07	down	AT1G03090	methylcrotonyl-CoA carboxylase alpha chain, mitochondrial / 3-methylcrotonyl-CoA carboxylase 1 (MCCA)
Ghir_D08G007620	0.0599973	1.28085	4.46601	1.24461e-05	up	AT1G54790	GDSL-like Lipase/Acylhydrolase superfamily protein
Ghir_D08G008050	0.289639	0.999896	1.85707	0.000606554	up	AT5G66520	Tetratricopeptide repeat (TPR)-like superfamily protein
Ghir_D08G008060	0.059124	0.391963	2.78055	8.46019e-06	up	AT5G27690	Heavy metal transport/detoxification superfamily protein
Ghir_D08G008290	8.38142	0	-26.9888	6.45168e-05	down	AT1G02816	Protein of unknown function, DUF538
Ghir_D08G008470	0.101558	1.44779	3.86988	0.00111986	up	AT5G19890	Peroxidase superfamily protein
Ghir_D08G008700	0.114277	2.78111	4.69702	0.00273162	up
Ghir_D08G009500	0.170831	0.619417	1.96287	0.0122529	up	AT2G23810	tetraspanin8
Ghir_D08G009500	0.176532	0.613566	1.89696	0.00328276	up	AT2G23810	tetraspanin8
Ghir_D08G009500	0.171693	0.568571	1.82728	0.0291832	up	AT2G23810	tetraspanin8
Ghir_D08G009500	0.169295	0.595561	1.9162	0.00741925	up	AT2G23810	tetraspanin8
Ghir_D08G009520	1.13998	0.230226	-2.22915	3.39208e-05	down
Ghir_D08G009610	7.14923	2.55661	-1.41918	0.0133359	down	AT3G03320	RNA-binding ASCH domain protein
Ghir_D08G009640	0.542471	1.85278	1.86067	5.14829e-13	up	AT4G30850	heptahelical transmembrane protein2
Ghir_D08G009780	18.1686	5.94197	-1.54468	0.0489139	down	AT2G10940	Bifunctional inhibitor/lipid-transfer protein/seed storage 2S albumin superfamily protein
Ghir_D08G009840	12.2601	4.54545	-1.3433	0.0428083	down	AT5G10790	ubiquitin-specific protease 22
Ghir_D08G010090	24.6985	62.0157	1.41277	0.0123505	up	AT5G23740	ribosomal protein S11-beta
Ghir_D08G010700	1.32981	2.843	1.18611	0.0012596	up	AT5G52060	BCL-2-associated athanogene 1
Ghir_D08G011710	25.0732	54.7518	1.20072	0.000489599	up	AT1G33140	Ribosomal protein L6 family
Ghir_D08G011790	6.04019	0.440538	-3.73002	0.0283614	down	AT1G32920	unknown protein; FUNCTIONS IN: molecular_function unknown; INVOLVED IN: response to wounding; LOCATED IN: endomembrane system; EXPRESSED IN: 23 plant structures; EXPRESSED DURING: 13 growth stages; BEST Arabidopsis thaliana protein match is: unknown protein (TAIR:AT1G32928.1); Has 42 Blast hits to 42 proteins in 8 species: Archae - 0; Bacteria - 0; Metazoa - 0; Fungi - 0; Plants - 42; Viruses - 0…
Ghir_D08G011800	104.314	0.719034	-7.08158	3.02506e-06	down	AT1G32900	UDP-Glycosyltransferase superfamily protein
Ghir_D08G011830	0.0702317	1.94509	4.87281	0.000125435	up	AT1G64710	GroES-like zinc-binding dehydrogenase family protein
Ghir_D08G011920	3.06309	12.5542	2.13437	0.00203506	up	AT4G24110	unknown protein; Has 76 Blast hits to 76 proteins in 13 species: Archae - 0; Bacteria - 0; Metazoa - 1; Fungi - 0; Plants - 75; Viruses - 0; Other Eukaryotes - 0 (source: NCBI BLink).
Ghir_D08G012020	11.807	31.8844	1.53838	0.0255125	up	AT4G24050	NAD(P)-binding Rossmann-fold superfamily protein
Ghir_D08G012320	0.0143053	0.148536	3.37203	0.0276951	up	ATCG00490	ribulose-bisphosphate carboxylases
Ghir_D08G012390	0.122127	0.672547	2.47136	9.80485e-05	up	ATCG00720	photosynthetic electron transfer B
Ghir_D08G012400	0.194239	0.997673	2.40097	0.0014586	up	ATCG00680	photosystem II reaction center protein B
Ghir_D08G012650	2.24549	13.5024	2.67611	0.000299301	up	AT4G23750	cytokinin response factor 2
Ghir_D08G012950	0	0.528751	9.34775	0.00965127	up	AT1G69230	SPIRAL1-like2
Ghir_D08G012980	1.54605	0.668847	-1.12506	0.00796345	down	AT5G41410	POX (plant homeobox) family protein
Ghir_D08G013300	8.60591	1.01996	-3.01951	0.0157527	down	AT4G02280	sucrose synthase 3
Ghir_D08G013970	5.43493	39.2421	2.93069	6.97373e-09	up	AT2G46660	cytochrome P450, family 78, subfamily A, polypeptide 6
Ghir_D08G014010	0.699216	3.26694	2.26796	0.00162378	up	ATCG01040	Cytochrome C assembly protein
Ghir_D08G014050	0.133555	1.26333	3.28958	0.0438638	up	AT1G22640	myb domain protein 3
Ghir_D08G014350	0	0.141733	23.1618	0.00108884	up	AT2G46240	BCL-2-associated athanogene 6
Ghir_D08G014980	1.29141	9.36724	2.95133	0.00619206	up	AT4G01250	WRKY family transcription factor
Ghir_D08G015230	1.20452	0.0110543	-6.46672	0.0317951	down	AT2G45270	glycoprotease 1
Ghir_D08G015410	0.926576	0.41387	-1.09622	0.00392524	down	AT3G60520	unknown protein; BEST Arabidopsis thaliana protein match is: unknown protein (TAIR:AT1G02070.1); Has 107 Blast hits to 107 proteins in 14 species: Archae - 0; Bacteria - 0; Metazoa - 0; Fungi - 0; Plants - 107; Viruses - 0; Other Eukaryotes - 0 (source: NCBI BLink).
Ghir_D08G015500	0.629402	1.71128	1.49805	0.0192351	up	AT3G60460	myb-like HTH transcriptional regulator family protein
Ghir_D08G016010	0.755759	67.0803	6.57513	3.92263e-13	up	AT3G57450	unknown protein; Has 65 Blast hits to 65 proteins in 11 species: Archae - 0; Bacteria - 0; Metazoa - 0; Fungi - 0; Plants - 65; Viruses - 0; Other Eukaryotes - 0 (source: NCBI BLink).
Ghir_D08G016390	0.613192	18.596	4.9914	1.1463e-08	up
Ghir_D08G016580	0.459317	3.35756	2.97172	0.0220708	up	AT4G19230	cytochrome P450, family 707, subfamily A, polypeptide 1
Ghir_D08G016610	31.5421	101.017	1.77063	0.00426455	up
Ghir_D08G017640	3.6887	60.7852	4.10298	0.0223738	up	AT1G53540	HSP20-like chaperones superfamily protein
Ghir_D08G018310	0.200915	0.899451	2.24556	0.00817896	up	AT5G47230	ethylene responsive element binding factor 5
Ghir_D08G018510	3.0187	1.24928	-1.19938	0.0471315	down	AT4G17350	Plant protein of unknown function (DUF828) with plant pleckstrin homology-like region
Ghir_D08G018550	0.0149427	0.433649	4.72728	0.0100306	up	AT5G47380	Protein of unknown function, DUF547
Ghir_D08G018730	0.218502	0.998728	2.26611	0.000559557	up	AT4G25200	mitochondrion-localized small heat shock protein 23.6
Ghir_D08G019210	14.5903	6.45362	-1.10606	0.00741925	down	AT1G62960	ACC synthase 10
Ghir_D08G019810	1.27799	4.74351	1.98284	0.00128108	up	AT3G48990	AMP-dependent synthetase and ligase family protein
Ghir_D08G019900	0.06136	0.567348	3.29258	0.0322009	up	AT5G41210	glutathione S-transferase THETA 1
Ghir_D08G020020	1.84381	0.643562	-1.43591	0.040737	down	AT1G63660	GMP synthase (glutamine-hydrolyzing), putative / glutamine amidotransferase, putative
Ghir_D08G020190	1.11643	0.372072	-1.50188	0.0342834	down	AT3G63010	alpha/beta-Hydrolases superfamily protein
Ghir_D08G020270	0.0495033	1.75402	5.15325	0.0222441	up
Ghir_D08G021170	4.28934	16.3356	2.02326	0.0406342	up	AT3G07090	PPPDE putative thiol peptidase family protein
Ghir_D08G021200	9.27064	2.4249	-1.86487	0.0476574	down	AT2G32720	cytochrome B5 isoform B
Ghir_D08G021640	0.00186267	0.0729283	4.87743	0.00306305	up	AT5G60700	glycosyltransferase family protein 2
Ghir_D08G021690	0.363478	18.1535	5.67345	1.54764e-20	up
Ghir_D08G021710	0.331055	40.4666	7.03372	7.97878e-08	up	AT5G60800	Heavy metal transport/detoxification superfamily protein
Ghir_D08G022140	0.0948547	0.961597	3.40698	0.0469804	up	AT1G56600	galactinol synthase 2
Ghir_D08G022360	1.77968	56.8976	5.06924	0.0185475	up	AT5G57580	Calmodulin-binding protein
Ghir_D08G022660	53.043	131.839	1.39218	0.0204674	up	AT3G61110	ribosomal protein S27
Ghir_D08G022810	18.4814	5.72764	-1.6202	2.78822e-06	down	AT3G06130	Heavy metal transport/detoxification superfamily protein
Ghir_D08G023190	2.65927	0.974484	-1.37494	0.0424059	down	AT5G28840	GDP-D-mannose 3',5'-epimerase
Ghir_D08G023520	0.442583	2.29075	2.4321	0.024262	up	AT5G33370	GDSL-like Lipase/Acylhydrolase superfamily protein
Ghir_D08G024330	0.0161377	0.160453	3.45084	0.010531	up	AT5G19040	isopentenyltransferase 5
Ghir_D08G024700	13.1194	53.512	2.10434	4.92735e-06	up	AT3G49910	Translation protein SH3-like family protein
Ghir_D08G024840	0.242688	2.95041	3.67695	5.4432e-20	up	AT1G65450	HXXXD-type acyl-transferase family protein
Ghir_D08G024960	0.0694173	0.359297	2.34589	0.0173681	up	AT5G23530	carboxyesterase 18
Ghir_D08G025500	0.054508	0.667887	3.66994	3.16542e-07	up
Ghir_D08G025950	0.419073	1.25	1.67931	0.00733957	up	AT2G43290	Calcium-binding EF-hand family protein
Ghir_D08G026030	15.8747	30.484	1.01434	0.00431076	up	AT5G20160	Ribosomal protein L7Ae/L30e/S12e/Gadd45 family protein
Ghir_D08G026680	0.929279	34.1719	5.29135	2.29383e-16	up	AT5G12010	unknown protein; INVOLVED IN: response to salt stress; LOCATED IN: chloroplast, plasma membrane, membrane; EXPRESSED IN: 23 plant structures; EXPRESSED DURING: 13 growth stages; BEST Arabidopsis thaliana protein match is: unknown protein (TAIR:AT4G29780.1); Has 1807 Blast hits to 1807 proteins in 277 species: Archae - 0; Bacteria - 0; Metazoa - 736; Fungi - 347; Plants - 385; Viruses - 0; Other E…
Ghir_D08G026780	0.358956	1.17474	1.79523	0.00809988	up	AT1G19210	Integrase-type DNA-binding superfamily protein
Ghir_D08G026970	0.387023	0.0452127	-2.97961	0.00863953	down	AT4G33040	Thioredoxin superfamily protein
Ghir_D08G027100	1.7906	4.62236	1.44216	0.0129969	up	AT5G25830	GATA transcription factor 12
Ghir_D08G027410	15.8276	5.00942	-1.58737	0.0444223	down	AT5G58060	SNARE-like superfamily protein
Ghir_D09G000450	35.7239	12.8943	-1.39455	0.000212424	down	AT5G51810	gibberellin 20 oxidase 2
Ghir_D09G001090	2.52236	0	-27.527	4.15433e-05	down	AT3G29280	unknown protein; Has 24 Blast hits to 24 proteins in 9 species: Archae - 0; Bacteria - 0; Metazoa - 0; Fungi - 0; Plants - 24; Viruses - 0; Other Eukaryotes - 0 (source: NCBI BLink).
[truncated: 519 more rows]

## Sheet: L1 0DPA vs L1 5DPA
Table S5-2. The differentially expressed genes (DEGs) of each pair-wise comparison of L1 0DPA vs L1 5DPA
geneID	L1_0DPA FPKM	L1_5DPA FPKM	log2FC	FDR	up or down_regulated in L2	Arabidopsis ID	ArabDesc
Ghir_A01G000010	0.800723	0.170655	-2.10234	0.000249294	down	AT5G14600	S-adenosyl-L-methionine-dependent methyltransferases superfamily protein
Ghir_A01G000030	1.29607	0.454426	-1.41215	0.0488423	down
Ghir_A01G000080	0.492892	12.008	4.69594	0.00166501	up	AT3G06470	GNS1/SUR4 membrane protein family
Ghir_A01G000100	28.3767	8.28399	-1.65314	2.58137e-05	down	AT1G15200	protein-protein interaction regulator family protein
Ghir_A01G000180	0.509194	0.0326935	-3.68848	0.000157863	down	AT4G35190	Putative lysine decarboxylase family protein
Ghir_A01G000230	32.2036	748.157	4.68448	3.97116e-21	up	AT2G16850	plasma membrane intrinsic protein 2;8
Ghir_A01G000290	0.00691	0.264529	5.33236	3.03028e-05	up	AT2G20990	synaptotagmin A
Ghir_A01G000310	2.72571	48.5794	4.28379	4.9109e-35	up	AT2G17870	cold shock domain protein 3
Ghir_A01G000330	0.817918	1.6769	1.17692	0.0204051	up	AT3G19000	2-oxoglutarate (2OG) and Fe(II)-dependent oxygenase superfamily protein
Ghir_A01G000350	1.00967	3.17249	1.79948	0.000154	up	AT2G16600	rotamase CYP 3
Ghir_A01G000400	2.78964	14.5578	2.51855	5.82842e-21	up	AT4G34640	squalene synthase 1
Ghir_A01G000440	0.00410133	8.14249	11.1508	4.97799e-14	up	AT4G39080	vacuolar proton ATPase A3
Ghir_A01G000490	25.9855	75.2171	1.68935	5.45849e-10	up	AT4G39200	Ribosomal protein S25 family protein
Ghir_A01G000530	0.0590607	1.18223	4.43762	2.23543e-06	up	AT1G19440	3-ketoacyl-CoA synthase 4
Ghir_A01G000540	50.6933	0.250109	-7.51753	1.26334e-13	down	AT1G75250	RAD-like 6
Ghir_A01G000560	0.16841	1.33646	3.05128	0.0195953	up
Ghir_A01G000570	2.68766	0.093564	-4.76605	0.00526969	down	AT1G60995	FUNCTIONS IN: molecular_function unknown; INVOLVED IN: biological_process unknown; LOCATED IN: cellular_component unknown; EXPRESSED IN: 20 plant structures; EXPRESSED DURING: 10 growth stages; CONTAINS InterPro DOMAIN/s: Membralin (InterPro:IPR019144); Has 172 Blast hits to 170 proteins in 70 species: Archae - 0; Bacteria - 0; Metazoa - 110; Fungi - 0; Plants - 38; Viruses - 0; Other Eukaryotes …
Ghir_A01G000590	1.09375	13.6455	3.83757	5.65365e-06	up	AT1G10950	transmembrane nine 1
Ghir_A01G000630	0.438676	0	-6.67271	0.00163215	down
Ghir_A01G000730	3.80289	1.31635	-1.40048	1.08862e-08	down	AT2G15695	Protein of unknown function DUF829, transmembrane 53
Ghir_A01G000780	22.2641	7.70401	-1.39397	1.3704e-05	down	AT4G34412	CONTAINS InterPro DOMAIN/s: Kinase binding protein CGI-121 (InterPro:IPR013926); Has 275 Blast hits to 275 proteins in 139 species: Archae - 0; Bacteria - 5; Metazoa - 98; Fungi - 109; Plants - 42; Viruses - 0; Other Eukaryotes - 21 (source: NCBI BLink).
Ghir_A01G000810	0.00540067	1.05844	7.60205	0.000697797	up	AT4G33980	BEST Arabidopsis thaliana protein match is: cold regulated gene 27 (TAIR:AT5G42900.2); Has 30201 Blast hits to 17322 proteins in 780 species: Archae - 12; Bacteria - 1396; Metazoa - 17338; Fungi - 3422; Plants - 5037; Viruses - 0; Other Eukaryotes - 2996 (source: NCBI BLink).
Ghir_A01G000820	17.7144	56.4972	1.82946	7.00873e-05	up	AT2G09990	Ribosomal protein S5 domain 2-like superfamily protein
Ghir_A01G000890	8.36347	17.5556	1.21165	9.75991e-14	up	AT4G35220	Cyclase family protein
Ghir_A01G000950	15.9309	6.31629	-1.19571	0.000322166	down	AT2G14910	unknown protein; LOCATED IN: chloroplast; EXPRESSED IN: 24 plant structures; EXPRESSED DURING: 15 growth stages; BEST Arabidopsis thaliana protein match is: unknown protein (TAIR:AT5G14970.1); Has 35333 Blast hits to 34131 proteins in 2444 species: Archae - 798; Bacteria - 22429; Metazoa - 974; Fungi - 991; Plants - 531; Viruses - 0; Other Eukaryotes - 9610 (source: NCBI BLink).
Ghir_A01G000970	3.41294	1.13188	-1.47541	0.000247831	down	AT4G33910	2-oxoglutarate (2OG) and Fe(II)-dependent oxygenase superfamily protein
Ghir_A01G001030	0	0.165238	8.59642	0.00744807	up	AT3G57880	Calcium-dependent lipid-binding (CaLB domain) plant phosphoribosyltransferase family protein
Ghir_A01G001050	0.518321	0.0536905	-3.04772	0.00244944	down	AT1G17870	ethylene-dependent gravitropism-deficient and yellow-green-like 3
Ghir_A01G001150	3.98185	1.06648	-1.7738	1.649e-14	down	AT4G38495	CONTAINS InterPro DOMAIN/s: YL1 nuclear, C-terminal (InterPro:IPR013272); Has 279 Blast hits to 279 proteins in 147 species: Archae - 0; Bacteria - 0; Metazoa - 94; Fungi - 133; Plants - 35; Viruses - 0; Other Eukaryotes - 17 (source: NCBI BLink).
Ghir_A01G001180	7.36915	2.77108	-1.25371	7.9281e-06	down	AT5G64360	Chaperone DnaJ-domain superfamily protein
Ghir_A01G001200	0.221802	1.84303	3.18274	1.11596e-07	up	AT4G38270	galacturonosyltransferase 3
Ghir_A01G001210	1.38475	0.0238655	-5.65403	0.00532883	down	AT3G43660	Vacuolar iron transporter (VIT) family protein
Ghir_A01G001230	11.1407	37.1298	1.88226	2.10971e-15	up	AT5G64090	FUNCTIONS IN: molecular_function unknown; INVOLVED IN: biological_process unknown; LOCATED IN: plasma membrane; EXPRESSED IN: 23 plant structures; EXPRESSED DURING: 13 growth stages; CONTAINS InterPro DOMAIN/s: Hyccin (InterPro:IPR018619); BEST Arabidopsis thaliana protein match is: unknown protein (TAIR:AT5G21050.1); Has 1807 Blast hits to 1807 proteins in 277 species: Archae - 0; Bacteria - 0; …
Ghir_A01G001240	0.500289	0.0303405	-3.33405	0.029857	down	AT5G48905	low-molecular-weight cysteine-rich 12
Ghir_A01G001260	0.737361	0.0659295	-3.40638	0.0124104	down	AT4G29280	low-molecular-weight cysteine-rich 22
Ghir_A01G001370	1.72754	3.56003	1.16902	0.00666391	up	AT4G35300	tonoplast monosaccharide transporter2
Ghir_A01G001390	2.1783	6.33341	1.70142	0.011078	up	AT5G64050	glutamate tRNA synthetase
Ghir_A01G001580	0.477613	0.0241195	-4.06224	0.0162263	down	AT3G21820	histone-lysine N-methyltransferase ATXR2
Ghir_A01G001600	0.242058	28.7964	7.04783	4.09284e-07	up	AT5G54680	basic helix-loop-helix (bHLH) DNA-binding superfamily protein
Ghir_A01G001670	43.162	6.00388	-2.68834	0.0481183	down	AT4G28240	Wound-responsive family protein
Ghir_A01G001700	5.84562	1.17887	-2.16347	6.3135e-05	down	AT3G15534	unknown protein; FUNCTIONS IN: molecular_function unknown; INVOLVED IN: biological_process unknown; LOCATED IN: cellular_component unknown; BEST Arabidopsis thaliana protein match is: unknown protein (TAIR:AT1G52855.1); Has 30201 Blast hits to 17322 proteins in 780 species: Archae - 12; Bacteria - 1396; Metazoa - 17338; Fungi - 3422; Plants - 5037; Viruses - 0; Other Eukaryotes - 2996 (source: NC…
Ghir_A01G001710	0.0580337	2.2735	5.30841	0.00223733	up	AT2G20840	Secretory carrier membrane protein (SCAMP) family protein
Ghir_A01G001760	0.234325	0	-5.89166	0.00448561	down	AT2G20875	epidermal patterning factor 1
Ghir_A01G001780	0.754094	0.0775325	-3.01413	0.0212271	down	AT4G03510	RING membrane-anchor 1
Ghir_A01G001860	0.706621	0.0704225	-3.19903	6.31247e-11	down	AT1G12280	LRR and NB-ARC domains-containing disease resistance protein
Ghir_A01G001890	0.475512	0.146644	-1.51267	0.0227295	down	AT5G63020	Disease resistance protein (CC-NBS-LRR class) family
Ghir_A01G002010	0.889961	0.24472	-1.7504	0.0325271	down	AT2G20570	GBF's pro-rich region-interacting factor 1
Ghir_A01G002020	5.21516	0.606553	-2.96863	0.000203382	down	AT2G20562	unknown protein; LOCATED IN: endomembrane system; BEST Arabidopsis thaliana protein match is: unknown protein (TAIR:AT2G31090.1); Has 70 Blast hits to 70 proteins in 13 species: Archae - 0; Bacteria - 0; Metazoa - 0; Fungi - 0; Plants - 70; Viruses - 0; Other Eukaryotes - 0 (source: NCBI BLink).
Ghir_A01G002050	0.003079	0.397166	7.02103	0.000185314	up	AT1G06290	acyl-CoA oxidase 3
Ghir_A01G002080	4.3033	8.53949	1.12005	0.00231697	up	AT5G13390	no exine formation 1
Ghir_A01G002140	4.78964	0.739335	-2.5907	1.84516e-07	down	AT2G33550	Homeodomain-like superfamily protein
Ghir_A01G002300	0.260327	1.80586	2.91854	0.0106343	up	AT5G13110	glucose-6-phosphate dehydrogenase 2
Ghir_A01G002310	0.160421	3.27611	4.4916	1.66217e-08	up
Ghir_A01G002340	1.51175	12.9805	3.21091	3.78694e-08	up	AT3G05990	Leucine-rich repeat (LRR) family protein
Ghir_A01G002390	5.79819	2.21672	-1.23499	0.000158718	down	AT5G19300	CONTAINS InterPro DOMAIN/s: Nucleic acid-binding, OB-fold-like (InterPro:IPR016027), Protein of unknown function DUF171 (InterPro:IPR003750); Has 3649 Blast hits to 1964 proteins in 291 species: Archae - 113; Bacteria - 121; Metazoa - 1082; Fungi - 399; Plants - 227; Viruses - 4; Other Eukaryotes - 1703 (source: NCBI BLink).
Ghir_A01G002400	10.0733	2.55378	-1.85429	0.000527445	down	AT2G32090	Lactoylglutathione lyase / glyoxalase I family protein
Ghir_A01G002410	0	0.170965	6.85538	0.0018709	up	AT4G14830	unknown protein; BEST Arabidopsis thaliana protein match is: unknown protein (TAIR:AT3G22530.1); Has 77 Blast hits to 77 proteins in 12 species: Archae - 0; Bacteria - 0; Metazoa - 0; Fungi - 0; Plants - 77; Viruses - 0; Other Eukaryotes - 0 (source: NCBI BLink).
Ghir_A01G002450	2.36309	16.7512	2.98381	1.61908e-29	up	AT5G43830	Aluminium induced protein with YGL and LRDR motifs
Ghir_A01G002520	8.07768	79.2184	3.46668	4.4801e-15	up	AT4G14440	3-hydroxyacyl-CoA dehydratase 1
Ghir_A01G002530	1.16558	0.031837	-4.93862	7.38636e-06	down	AT3G23130	C2H2 and C2HC zinc fingers superfamily protein
Ghir_A01G002540	1.55079	0.278185	-2.36618	9.08206e-08	down	AT1G04420	NAD(P)-linked oxidoreductase superfamily protein
Ghir_A01G002860	1.69414	0.670073	-1.21728	0.0240199	down	AT4G16060	unknown protein; FUNCTIONS IN: molecular_function unknown; INVOLVED IN: biological_process unknown; LOCATED IN: chloroplast, chloroplast stroma; EXPRESSED IN: 22 plant structures; EXPRESSED DURING: 13 growth stages; Has 42 Blast hits to 42 proteins in 16 species: Archae - 0; Bacteria - 2; Metazoa - 0; Fungi - 0; Plants - 33; Viruses - 0; Other Eukaryotes - 7 (source: NCBI BLink).
Ghir_A01G002900	0.0931113	0	-6.25951	0.031528	down	AT4G16110	response regulator 2
Ghir_A01G002920	1.53139	0.163788	-3.11718	0.00381772	down	AT3G06740	GATA transcription factor 15
Ghir_A01G002950	0	0.295436	7.3519	0.000242202	up	AT2G47480	Protein of unknown function (DUF3511)
Ghir_A01G002970	0.970538	0.182326	-2.2968	0.000339239	down
Ghir_A01G002980	1.42877	12.1738	3.26088	0.0324055	up	AT5G49460	ATP citrate lyase subunit B 2
Ghir_A01G003100	0.415742	0	-8.39581	0.000638198	down	AT3G06520	agenet domain-containing protein
Ghir_A01G003110	4.80143	0.682511	-2.67038	0.00712329	down	AT1G02400	gibberellin 2-oxidase 6
Ghir_A01G003130	0.402431	0.017888	-4.32101	0.0223466	down	AT5G18500	Protein kinase superfamily protein
Ghir_A01G003190	1.64521	0.680601	-1.11889	0.0464978	down	AT1G72250	Di-glucose binding protein with Kinesin motor domain
Ghir_A01G003210	4.44	1.44324	-1.49451	0.0100608	down	AT1G16680	Chaperone DnaJ-domain superfamily protein
Ghir_A01G003250	17.1538	4.73056	-1.72524	1.80062e-08	down	AT1G56020	unknown protein; BEST Arabidopsis thaliana protein match is: unknown protein (TAIR:AT3G12970.1); Has 3011 Blast hits to 958 proteins in 192 species: Archae - 0; Bacteria - 193; Metazoa - 479; Fungi - 286; Plants - 158; Viruses - 8; Other Eukaryotes - 1887 (source: NCBI BLink).
Ghir_A01G003290	0.0710457	0	-6.92481	0.00134317	down	AT1G11350	S-domain-1 13
Ghir_A01G003520	75.6083	366.127	2.42177	9.25454e-14	up	AT1G17200	Uncharacterised protein family (UPF0497)
Ghir_A01G003530	3.21543	35.5185	3.62149	1.65862e-41	up	AT4G09650	ATP synthase delta-subunit gene
Ghir_A01G003590	5.10187	0.554318	-2.98468	0.0222543	down	AT1G66340	Signal transduction histidine kinase, hybrid-type, ethylene sensor
Ghir_A01G003640	0.218892	0	-8.40016	0.00275102	down	AT1G78420	RING/U-box superfamily protein
Ghir_A01G003650	24.1219	10.4346	-1.06373	0.00894166	down	AT1G78430	ROP interactive partner 2
Ghir_A01G003680	0.0809523	1.67133	4.51247	0.00650379	up	AT1G17110	ubiquitin-specific protease 15
Ghir_A01G003770	0.0391877	1.9271	5.61613	1.88284e-11	up
Ghir_A01G003790	0	11.0238	12.5259	5.3412e-14	up
Ghir_A01G003800	0.293063	7.77731	4.89469	7.75788e-06	up
Ghir_A01G003890	0.124423	0.0098355	-3.56488	0.000197645	down	AT3G14690	cytochrome P450, family 72, subfamily A, polypeptide 15
Ghir_A01G003900	7.71471	1.13906	-2.63385	0.0103675	down	AT1G76065	LYR family of Fe/S cluster biogenesis protein
Ghir_A01G003990	0.564597	0	-23.9372	0.000681187	down	AT4G27190	NB-ARC domain-containing disease resistance protein
Ghir_A01G004010	0.00131567	0	-15.4021	6.30791e-05	down	AT3G14720	MAP kinase 19
Ghir_A01G004050	1.16258	0	-10.1057	5.80052e-10	down	AT1G78560	Sodium Bile acid symporter family
Ghir_A01G004130	1.31998	0.264653	-2.17825	2.02967e-08	down	AT1G78590	NAD(H) kinase 3
Ghir_A01G004190	0.0739903	34.7016	9.05421	4.26947e-05	up	AT1G78710	TRICHOME BIREFRINGENCE-LIKE 42
Ghir_A01G004210	0.0262497	0	-5.71635	0.00946439	down	AT3G14840	Leucine-rich repeat transmembrane protein kinase
Ghir_A01G004310	4.95524	0.527121	-3.05339	1.56825e-08	down
Ghir_A01G004320	0	7.58271	12.9201	3.86465e-11	up	AT2G21110	Disease resistance-responsive (dirigent-like protein) family protein
Ghir_A01G004340	1.39431	0.233053	-2.46241	3.35617e-12	down	AT1G78650	DNA-directed DNA polymerases
Ghir_A01G004370	0.419692	0.065081	-2.50026	0.00966701	down	AT1G78660	gamma-glutamyl hydrolase 1
Ghir_A01G004450	0.82251	0.300559	-1.33333	0.0120245	down	AT5G38260	Protein kinase superfamily protein
Ghir_A01G004460	0.0383633	0	-5.84929	0.00233493	down	AT5G38260	Protein kinase superfamily protein
Ghir_A01G004470	9.36806	3.15625	-1.45509	0.00260224	down	AT1G78700	BES1/BZR1 homolog 4
Ghir_A01G004530	1.23757	0.181191	-2.57745	0.000317828	down	AT5G55130	co-factor for nitrate, reductase and xanthine dehydrogenase 5
Ghir_A01G004590	0.549878	0.149701	-1.75221	0.0394932	down
Ghir_A01G004680	6.06547	29.6791	2.44633	4.19897e-17	up	AT1G53320	tubby like protein 7
Ghir_A01G004710	18.1301	4.22216	-1.9739	1.08823e-13	down	AT3G14890	phosphoesterase
Ghir_A01G004770	2.2534	5.24298	1.34705	5.38965e-07	up	AT3G14920	Peptide-N4-(N-acetyl-beta-glucosaminyl)asparagine amidase A protein
Ghir_A01G004780	0.453375	0.044905	-3.15167	3.22735e-08	down	AT3G14930	Uroporphyrinogen decarboxylase
Ghir_A01G004810	0	0.419293	9.72949	0.0162918	up	AT1G78860	D-mannose binding lectin protein with Apple-like carbohydrate-binding domain
Ghir_A01G004820	0.00208667	2.24581	9.72904	0.00145243	up	AT1G78860	D-mannose binding lectin protein with Apple-like carbohydrate-binding domain
Ghir_A01G004840	5.399	17.5641	1.79843	0.0422814	up	AT3G14940	phosphoenolpyruvate carboxylase 3
Ghir_A01G004980	0.302613	0.874175	1.65934	0.00456349	up
Ghir_A01G005000	7.63485	141.405	4.33158	0.000696634	up	AT3G15020	Lactate/malate dehydrogenase family protein
Ghir_A01G005110	0.072581	0.285851	2.12666	0.0152394	up	AT3G15050	IQ-domain 10
Ghir_A01G005200	0.771874	0.281811	-1.28572	0.0443542	down	AT5G53950	NAC (No Apical Meristem) domain transcriptional regulator superfamily protein
Ghir_A01G005270	3.01722	0.179898	-3.9241	2.05038e-07	down	AT1G53160	squamosa promoter binding protein-like 4
Ghir_A01G005410	0.374042	4.58879	3.73965	1.42908e-25	up	AT3G15350	Core-2/I-branching beta-1,6-N-acetylglucosaminyltransferase family protein
Ghir_A01G005430	0	0.785583	9.68978	0.000115411	up	AT1G53035	unknown protein; FUNCTIONS IN: molecular_function unknown; INVOLVED IN: biological_process unknown; LOCATED IN: endomembrane system; EXPRESSED IN: 23 plant structures; EXPRESSED DURING: 13 growth stages; BEST Arabidopsis thaliana protein match is: unknown protein (TAIR:AT3G15358.1); Has 49 Blast hits to 49 proteins in 9 species: Archae - 0; Bacteria - 0; Metazoa - 0; Fungi - 0; Plants - 49; Virus…
Ghir_A01G005500	0.545733	0	-7.84265	2.63576e-05	down	AT5G34885	Protein of unknown function (DUF784)
Ghir_A01G005510	6.10547	2.34206	-1.27158	0.000408349	down	AT5G53770	Nucleotidyltransferase family protein
Ghir_A01G005530	0.15114	0.0011565	-6.35207	0.00494677	down	AT4G12010	Disease resistance protein (TIR-NBS-LRR class) family
Ghir_A01G005540	0.0422377	0	-6.60304	0.00423391	down	AT5G36930	Disease resistance protein (TIR-NBS-LRR class) family
Ghir_A01G005550	0.0937373	0	-7.82566	0.000426478	down	AT4G12010	Disease resistance protein (TIR-NBS-LRR class) family
Ghir_A01G005560	4.6046	2.04504	-1.05425	0.00321885	down	AT4G27470	RING membrane-anchor 3
Ghir_A01G005580	3.90745	1.41487	-1.32157	0.00175566	down	AT4G21705	Tetratricopeptide repeat (TPR)-like superfamily protein
Ghir_A01G005660	0.030083	0.581847	4.30343	0.000614287	up	AT1G26700	Seven transmembrane MLO family protein
Ghir_A01G005670	7.84506	2.59978	-1.44102	0.0247645	down	AT5G53750	CBS domain-containing protein
Ghir_A01G005680	3.50346	15.8073	2.34101	9.02264e-06	up	AT4G27450	Aluminium induced protein with YGL and LRDR motifs
Ghir_A01G005690	1.30209	5.18584	2.12816	0.00163614	up	AT5G05520	Outer membrane OMP85 family protein
Ghir_A01G005740	2.23464	39.7698	4.28488	1.05172e-10	up	AT4G27435	Protein of unknown function (DUF1218)
Ghir_A01G005780	0.870041	0.043373	-4.17164	0.000217958	down	AT4G27410	NAC (No Apical Meristem) domain transcriptional regulator superfamily protein
Ghir_A01G005810	7.90549	20.4214	1.49743	1.36347e-06	up	AT5G54440	CLUB
Ghir_A01G005840	7.87215	2.73138	-1.40566	1.30238e-05	down	AT5G54400	S-adenosyl-L-methionine-dependent methyltransferases superfamily protein
Ghir_A01G005860	0.208932	2.8279	3.85595	2.32849e-12	up	AT1G52855	unknown protein; BEST Arabidopsis thaliana protein match is: unknown protein (TAIR:AT3G15534.1); Has 35333 Blast hits to 34131 proteins in 2444 species: Archae - 798; Bacteria - 22429; Metazoa - 974; Fungi - 991; Plants - 531; Viruses - 0; Other Eukaryotes - 9610 (source: NCBI BLink).
Ghir_A01G005960	3.39618	0.642616	-2.26208	0.00384315	down	AT4G27390	unknown protein; INVOLVED IN: biological_process unknown; LOCATED IN: chloroplast; EXPRESSED IN: 22 plant structures; EXPRESSED DURING: 13 growth stages; Has 30201 Blast hits to 17322 proteins in 780 species: Archae - 12; Bacteria - 1396; Metazoa - 17338; Fungi - 3422; Plants - 5037; Viruses - 0; Other Eukaryotes - 2996 (source: NCBI BLink).
Ghir_A01G006050	5.29175	10.0645	1.04575	0.00676726	up	AT5G54110	membrane-associated mannitol-induced
Ghir_A01G006070	24.6073	3.71387	-2.59836	0.00161058	down	AT4G10270	Wound-responsive family protein
Ghir_A01G006100	0.443638	0.033122	-3.49389	0.0108436	down	AT5G08240	unknown protein; BEST Arabidopsis thaliana protein match is: unknown protein (TAIR:AT5G23160.1); Has 69 Blast hits to 69 proteins in 10 species: Archae - 0; Bacteria - 1; Metazoa - 0; Fungi - 0; Plants - 68; Viruses - 0; Other Eukaryotes - 0 (source: NCBI BLink).
Ghir_A01G006130	3.86982	1.42568	-1.32414	0.00336828	down	AT4G27310	B-box type zinc finger family protein
Ghir_A01G006160	0	0.203513	9.01566	3.86097e-07	up	AT1G11340	S-locus lectin protein kinase family protein
Ghir_A01G006200	81.3673	0.372009	-7.63051	1.24351e-21	down	AT4G27280	Calcium-binding EF-hand family protein
Ghir_A01G006260	6.76635	47.7722	3.01231	0.0269183	up	AT4G27270	Quinone reductase family protein
Ghir_A01G006330	0.0128093	0.360583	5.0176	0.0227117	up	AT5G54530	Protein of unknown function, DUF538
Ghir_A01G006340	4.84623	1.98602	-1.15161	3.4622e-05	down	AT3G20650	mRNA capping enzyme family protein
Ghir_A01G006360	0.669063	0.015117	-5.38109	9.0414e-05	down	AT5G23960	terpene synthase 21
Ghir_A01G006390	7.26124	0.888815	-2.93294	3.62696e-06	down	AT5G48150	GRAS family transcription factor
Ghir_A01G006430	13.9583	27.6294	1.1362	0.0040862	up	AT1G65290	mitochondrial acyl carrier protein 2
Ghir_A01G006440	4.78709	1.15868	-1.90167	0.0249875	down	AT4G27250	NAD(P)-binding Rossmann-fold superfamily protein
Ghir_A01G006450	1.91571	0.0878865	-4.34943	0.0481183	down	AT5G54630	zinc finger protein-related
Ghir_A01G006570	6.31339	0.505138	-3.56566	2.50047e-05	down	AT3G20600	Late embryogenesis abundant (LEA) hydroxyproline-rich glycoprotein family
Ghir_A01G006590	20.0015	2.36463	-2.94254	1.06362e-07	down	AT4G05050	ubiquitin 11
Ghir_A01G006600	0.672033	13.8904	4.55076	0.0191629	up	AT4G05320	polyubiquitin 10
Ghir_A01G006620	65.193	22.7072	-1.37788	0.0143939	down	AT1G54290	Translation initiation factor SUI1 family protein
Ghir_A01G006640	7.47774	3.17458	-1.10039	0.0319473	down	AT4G27120	CONTAINS InterPro DOMAIN/s: DDRGK domain (InterPro:IPR019153); Has 14775 Blast hits to 8764 proteins in 778 species: Archae - 29; Bacteria - 1878; Metazoa - 5164; Fungi - 1447; Plants - 582; Viruses - 164; Other Eukaryotes - 5511 (source: NCBI BLink).
Ghir_A01G006720	3.76798	0	-10.8583	6.14081e-09	down	AT5G54790	unknown protein; BEST Arabidopsis thaliana protein match is: unknown protein (TAIR:AT1G50930.1); Has 53 Blast hits to 53 proteins in 10 species: Archae - 0; Bacteria - 0; Metazoa - 0; Fungi - 0; Plants - 53; Viruses - 0; Other Eukaryotes - 0 (source: NCBI BLink).
Ghir_A01G006790	0	0.287384	23.5541	4.90957e-12	up	AT4G23160	cysteine-rich RLK (RECEPTOR-like protein kinase) 8
Ghir_A01G006860	12.7476	3.76254	-1.62725	0.000241292	down	AT1G50900	Ankyrin repeat family protein
Ghir_A01G006910	0.00815567	3.26038	8.60893	3.61338e-07	up	AT4G27060	ARM repeat superfamily protein
Ghir_A01G006940	0.175806	0	-7.12934	6.19634e-05	down	AT3G20530	Protein kinase superfamily protein
Ghir_A01G007010	0.502921	0.0581995	-2.978	0.011455	down	AT5G36110	cytochrome P450, family 716, subfamily A, polypeptide 1
Ghir_A01G007030	14.709	55.6354	2.05847	1.2991e-13	up	AT4G27000	RNA-binding (RRM/RBD/RNP motifs) family protein
Ghir_A01G007060	0.138823	0	-5.42713	0.0289544	down	AT3G20340	Expression of the gene is downregulated in the presence of paraquat, an inducer of photoxidative stress.
Ghir_A01G007120	9.31605	32.5113	1.94005	0.000940934	up	AT1G20970	FUNCTIONS IN: molecular_function unknown; INVOLVED IN: biological_process unknown; LOCATED IN: plasma membrane, vacuole; EXPRESSED IN: guard cell, cultured cell; BEST Arabidopsis thaliana protein match is: proton pump interactor 1 (TAIR:AT4G27500.1); Has 30201 Blast hits to 17322 proteins in 780 species: Archae - 12; Bacteria - 1396; Metazoa - 17338; Fungi - 3422; Plants - 5037; Viruses - 0; Othe…
Ghir_A01G007130	5.17791	2.33942	-1.00499	0.000921249	down	AT4G26965	NADH:ubiquinone oxidoreductase, 17.2kDa subunit
Ghir_A01G007140	0.751101	1.53172	1.18001	0.00100777	up	AT1G15700	ATPase, F1 complex, gamma subunit protein
Ghir_A01G007150	3.62238	0.462787	-2.80356	0.0227954	down	AT5G54970	unknown protein; BEST Arabidopsis thaliana protein match is: unknown protein (TAIR:AT4G26960.1); Has 1807 Blast hits to 1807 proteins in 277 species: Archae - 0; Bacteria - 0; Metazoa - 736; Fungi - 347; Plants - 385; Viruses - 0; Other Eukaryotes - 339 (source: NCBI BLink).
Ghir_A01G007160	2.32763	0.583592	-1.8386	8.08179e-06	down	AT4G04630	Protein of unknown function, DUF584
Ghir_A01G007170	3.02237	0.177818	-3.87297	0.0277199	down	AT4G38460	geranylgeranyl reductase
Ghir_A01G007180	0.269826	0.0439995	-2.54422	0.0129701	down	ATMG00860	DNA/RNA polymerases superfamily protein
Ghir_A01G007210	0.417392	0.02368	-3.94905	0.000482923	down	AT4G26930	myb domain protein 97
Ghir_A01G007370	0	2.58751	12.1428	2.27389e-20	up	AT2G41640	Glycosyltransferase family 61 protein
Ghir_A01G007390	74.9461	28.08	-1.25384	0.000451416	down	AT4G26850	mannose-1-phosphate guanylyltransferase (GDP)s;GDP-galactose:mannose-1-phosphate guanylyltransferases;GDP-galactose:glucose-1-phosphate guanylyltransferases;GDP-galactose:myoinositol-1-phosphate guanylyltransferases;glucose-1-phosphate guanylyltransferase
Ghir_A01G007420	0.291475	0.0218145	-3.713	0.0395253	down	AT5G55180	O-Glycosyl hydrolases family 17 protein
Ghir_A01G007430	0.751566	0.047047	-3.7454	0.000387032	down	AT2G05790	O-Glycosyl hydrolases family 17 protein
Ghir_A01G007450	3.81493	47.2364	3.7775	3.90768e-14	up	AT3G20300	Protein of unknown function (DUF3537)
Ghir_A01G007460	0	1.95237	36.5876	4.40545e-08	up	AT3G20290	EPS15 homology domain 1
Ghir_A01G007470	0.104876	0	-7.36819	0.00098011	down	AT4G26790	GDSL-like Lipase/Acylhydrolase superfamily protein
Ghir_A01G007490	49.7624	16.1088	-1.49269	1.29521e-06	down	AT4G22320	unknown protein; FUNCTIONS IN: molecular_function unknown; INVOLVED IN: biological_process unknown; EXPRESSED IN: 24 plant structures; EXPRESSED DURING: 14 growth stages; BEST Arabidopsis thaliana protein match is: unknown protein (TAIR:AT5G55210.1).
Ghir_A01G007550	4.07341	1.13525	-1.7103	0.00622225	down	AT5G55250	IAA carboxylmethyltransferase 1
Ghir_A01G007640	1.42969	0.387313	-1.78449	0.0120729	down	AT1G50590	RmlC-like cupins superfamily protein
Ghir_A01G007690	2.74278	0.449548	-2.45982	5.8579e-08	down	AT3G06130	Heavy metal transport/detoxification superfamily protein
Ghir_A01G007760	0.448604	31.9609	6.27986	4.08662e-84	up	AT5G55560	Protein kinase superfamily protein
Ghir_A01G007780	5.90632	1.8032	-1.59695	0.0038116	down	AT1G50600	scarecrow-like 5
Ghir_A01G007830	3.19583	0.228139	-3.58005	1.87947e-06	down	AT4G16447	unknown protein; Has 30201 Blast hits to 17322 proteins in 780 species: Archae - 12; Bacteria - 1396; Metazoa - 17338; Fungi - 3422; Plants - 5037; Viruses - 0; Other Eukaryotes - 2996 (source: NCBI BLink).
Ghir_A01G007900	9.61778	1.24027	-2.84791	3.97465e-12	down	AT3G26300	cytochrome P450, family 71, subfamily B, polypeptide 34
Ghir_A01G007960	6.23538	1.92528	-1.5279	0.00623161	down	AT3G13120	Ribosomal protein S10p/S20e family protein
Ghir_A01G008000	9.80666	3.79772	-1.24782	0.00665471	down	AT1G55910	zinc transporter 11 precursor
Ghir_A01G008020	0.094293	0.0074975	-3.48935	0.0474697	down	AT3G13170	Spo11/DNA topoisomerase VI, subunit A protein
Ghir_A01G008090	44.5857	108.987	1.43199	2.14119e-09	up	AT5G55730	FASCICLIN-like arabinogalactan 1
Ghir_A01G008100	2.25852	7.41372	1.8607	1.94225e-05	up	AT4G25434	nudix hydrolase homolog 10
Ghir_A01G008160	0.112611	0.0021915	-5.16915	0.0232915	down	AT3G13180	NOL1/NOP2/sun family protein / antitermination NusB domain-containing protein
Ghir_A01G008200	2.30992	0.509382	-2.03144	4.41745e-10	down	AT1G55850	cellulose synthase like E1
Ghir_A01G008210	0.050095	0	-6.36577	0.0438932	down	AT1G55850	cellulose synthase like E1
Ghir_A01G008220	0.766874	0.05196	-3.75513	0.00762621	down	AT5G55860	Plant protein of unknown function (DUF827)
Ghir_A01G008230	5.03e-05	0.249525	6.3908	0.00472869	up	AT4G26620	Sucrase/ferredoxin-like family protein
Ghir_A01G008300	4.78498	19.5512	2.15663	8.50957e-07	up	AT5G55960	unknown protein; CONTAINS InterPro DOMAIN/s: Uncharacterised protein family UPF0118 (InterPro:IPR002549); Has 30201 Blast hits to 17322 proteins in 780 species: Archae - 12; Bacteria - 1396; Metazoa - 17338; Fungi - 3422; Plants - 5037; Viruses - 0; Other Eukaryotes - 2996 (source: NCBI BLink).
Ghir_A01G008320	11.6143	2.318	-2.20327	1.67897e-08	down	AT5G47770	farnesyl diphosphate synthase 1
Ghir_A01G008330	0.135947	0	-6.04987	0.00606446	down	AT5G55980	serine-rich protein-related
Ghir_A01G008600	0.207673	0	-6.44755	0.0350604	down	AT2G04240	RING/U-box superfamily protein
Ghir_A01G008680	2.81471	0.573044	-2.13837	0.0109099	down	AT3G12830	SAUR-like auxin-responsive protein family
Ghir_A01G008720	5.92769	0.616225	-3.12269	1.32687e-05	down	AT1G79180	myb domain protein 63
Ghir_A01G008830	0.682014	0.186087	-1.76314	0.0196155	down	AT1G48670	auxin-responsive GH3 family protein
Ghir_A01G008950	10.8139	23.0093	1.23707	3.74137e-05	up	AT1G16300	glyceraldehyde-3-phosphate dehydrogenase of plastid 2
Ghir_A01G009000	0.742641	0.050759	-3.51474	4.53762e-05	down	AT3G09510	Ribonuclease H-like superfamily protein
Ghir_A01G009090	0	0.685211	10.1162	0.015528	up	AT1G66350	RGA-like 1
Ghir_A01G009100	8.68224	2.83377	-1.5011	0.00145269	down	AT1G56170	nuclear factor Y, subunit C2
Ghir_A01G009130	6.95699	15.63	1.30639	2.0725e-08	up	AT1G79440	aldehyde dehydrogenase 5F1
Ghir_A01G009250	2.10243	0.848453	-1.18439	3.49048e-07	down	AT5G42370	Calcineurin-like metallo-phosphoesterase superfamily protein
Ghir_A01G009260	0.264591	0.038081	-2.61791	0.040207	down	AT1G21050	Protein of unknown function, DUF617
Ghir_A01G009270	5.00854	0.755398	-2.59782	2.15838e-06	down	AT1G21010	unknown protein; FUNCTIONS IN: molecular_function unknown; INVOLVED IN: N-terminal protein myristoylation; LOCATED IN: cellular_component unknown; EXPRESSED IN: 24 plant structures; EXPRESSED DURING: 14 growth stages; BEST Arabidopsis thaliana protein match is: unknown protein (TAIR:AT1G76600.1); Has 206 Blast hits to 206 proteins in 13 species: Archae - 0; Bacteria - 0; Metazoa - 0; Fungi - 0; P…
Ghir_A01G009300	0.17938	5.95e-05	-5.34886	0.00491571	down	AT1G20930	cyclin-dependent kinase B2;2
Ghir_A01G009350	0.392641	1.75517	2.30003	0.0364632	up	AT1G20870	HSP20-like chaperones superfamily protein
Ghir_A01G009390	1.73483	15.6752	3.30901	1.37199e-11	up	AT1G76400	Ribophorin I
Ghir_A01G009460	4.51771	11.6582	1.51319	0.000391891	up	AT1G42480	unknown protein; FUNCTIONS IN: molecular_function unknown; INVOLVED IN: biological_process unknown; LOCATED IN: endomembrane system; EXPRESSED IN: 24 plant structures; EXPRESSED DURING: 13 growth stages; CONTAINS InterPro DOMAIN/s: Protein of unknown function DUF3456 (InterPro:IPR021852); Has 177 Blast hits to 177 proteins in 59 species: Archae - 0; Bacteria - 0; Metazoa - 140; Fungi - 0; Plants …
Ghir_A01G009490	6.52721	2.71987	-1.11374	0.00358581	down	AT1G20770	unknown protein; Has 59 Blast hits to 59 proteins in 24 species: Archae - 0; Bacteria - 0; Metazoa - 26; Fungi - 4; Plants - 29; Viruses - 0; Other Eukaryotes - 0 (source: NCBI BLink).
Ghir_A01G009500	0.155794	1.55021	3.45775	0.0223094	up	AT1G20760	Calcium-binding EF hand family protein
Ghir_A01G009540	70.459	13.2025	-2.26638	6.98035e-05	down	AT1G20693	high mobility group B2
Ghir_A01G009630	0.153975	0.003471	-5.23808	0.0382857	down	AT5G17410	Spc97 / Spc98 family of spindle pole body (SBP) component
Ghir_A01G009660	1.97061	0	-11.7571	1.59629e-05	down	AT1G76140	Prolyl oligopeptidase family protein
Ghir_A01G009680	5.66299	1.54114	-1.73662	8.94201e-06	down	AT4G35750	SEC14 cytosolic factor family protein / phosphoglyceride transfer family protein
Ghir_A01G009690	0.022226	0	-5.19508	0.0201907	down	AT5G40410	Tetratricopeptide repeat (TPR)-like superfamily protein
Ghir_A01G009730	3.03093	8.6895	1.62552	0.0248609	up	AT4G38510	ATPase, V1 complex, subunit B protein
Ghir_A01G009740	0.382728	0.015129	-4.25617	0.0254631	down	AT1G60420	DC1 domain-containing protein
Ghir_A01G009750	91.8778	367.642	2.15414	1.3934e-25	up	AT5G60390	GTP binding Elongation factor Tu family protein
Ghir_A01G009910	78.7813	1.87487	-5.27749	1.06582e-16	down	AT2G17880	Chaperone DnaJ-domain superfamily protein
Ghir_A01G009980	0.19461	0	-6.94943	0.00282791	down	AT1G75580	SAUR-like auxin-responsive protein family
Ghir_A01G010020	8.3125	3.28333	-1.20741	1.13422e-06	down	AT5G39590	TLD-domain containing nucleolar protein
Ghir_A01G010060	0.00224467	0.973258	7.73264	0.00420313	up	AT1G30845	unknown protein; Has 120 Blast hits to 120 proteins in 67 species: Archae - 0; Bacteria - 0; Metazoa - 35; Fungi - 37; Plants - 23; Viruses - 0; Other Eukaryotes - 25 (source: NCBI BLink).
Ghir_A01G010070	0.683453	16.838	4.85981	0.000149032	up	AT1G19900	glyoxal oxidase-related protein
Ghir_A01G010130	5.17069	0	-12.1148	4.25929e-12	down	AT1G75520	SHI-related sequence 5
Ghir_A01G010140	0.683988	4.45086	2.83953	0.000831461	up	AT4G39080	vacuolar proton ATPase A3
Ghir_A01G010160	1.38744	6.22758	2.3039	0.00379748	up	AT1G75500	Walls Are Thin 1
Ghir_A01G010180	17.6105	4.13682	-1.94805	0.00462218	down	AT3G51030	thioredoxin H-type 1
Ghir_A01G010220	3.04975	0.206734	-3.71407	7.83256e-10	down	AT5G66440	unknown protein; BEST Arabidopsis thaliana protein match is: unknown protein (TAIR:AT4G34560.1); Has 1807 Blast hits to 1807 proteins in 277 species: Archae - 0; Bacteria - 0; Metazoa - 736; Fungi - 347; Plants - 385; Viruses - 0; Other Eukaryotes - 339 (source: NCBI BLink).
Ghir_A01G010250	7.1438	30.3901	2.23654	6.38238e-16	up	AT1G75280	NmrA-like negative transcriptional regulator family protein
Ghir_A01G010300	22.5872	3.87695	-2.40899	0.0050351	down	AT1G75240	homeobox protein 33
Ghir_A01G010360	5.88043	16.7354	1.66457	0.000601561	up	AT5G42740	Sugar isomerase (SIS) family protein
Ghir_A01G010460	0.369669	0.117168	-1.46689	0.0375769	down	AT1G75100	J-domain protein required for chloroplast accumulation response 1
Ghir_A01G010470	4.20941	12.2806	1.68381	0.00144579	up	AT1G47740	PPPDE putative thiol peptidase family protein
Ghir_A01G010500	0.637272	1.29895	1.17083	0.0307297	up	AT1G19300	Nucleotide-diphospho-sugar transferases superfamily protein
Ghir_A01G010510	0.327222	0	-9.06716	0.0174897	down	AT1G19270	DA1
Ghir_A01G010560	0.682043	0	-9.98874	0.000420105	down	AT4G33300	ADR1-like 1
Ghir_A01G010630	1.77582	4.86518	1.59584	5.00081e-09	up	AT4G33380	unknown protein; Has 194 Blast hits to 189 proteins in 23 species: Archae - 0; Bacteria - 0; Metazoa - 0; Fungi - 0; Plants - 184; Viruses - 0; Other Eukaryotes - 10 (source: NCBI BLink).
Ghir_A01G010660	3.46113	6.66434	1.10555	0.00119207	up	AT5G44250	Protein of unknown function DUF829, transmembrane 53
Ghir_A01G010670	2.72303	0.680977	-1.87095	0.0317937	down	AT5G42700	AP2/B3-like transcriptional factor family protein
Ghir_A01G010700	4.25889	7.77652	1.00528	0.0134567	up	AT4G33350	Tic22-like family protein
Ghir_A01G010710	0.302722	0.0871115	-1.64814	0.010344	down	AT2G26570	Plant protein of unknown function (DUF827)
Ghir_A01G010720	2.35919	0.114135	-4.25657	0.00664083	down	AT1G45474	photosystem I light harvesting complex gene 5
Ghir_A01G010770	0.170074	8.53612	5.78336	1.50802e-14	up	AT5G42890	sterol carrier protein 2
Ghir_A01G010980	0.340018	0.086052	-1.78158	0.0478425	down	AT1G46480	WUSCHEL related homeobox 4
Ghir_A01G011030	1.26552	4.24578	1.87935	0.024696	up	AT1G27752	Ubiquitin system component Cue protein
Ghir_A01G011110	0.17149	0	-6.31881	0.040328	down	AT3G49760	basic leucine-zipper 5
Ghir_A01G011150	1.65821	7.91435	2.40096	0.000298332	up	AT1G65590	beta-hexosaminidase 3
Ghir_A01G011220	7.56641	1.17218	-2.54205	0.000118869	down	AT1G49510	embryo defective 1273
Ghir_A01G011290	0.863736	0.230416	-1.73531	0.0137907	down	AT1G27600	Nucleotide-diphospho-sugar transferases superfamily protein
Ghir_A01G011320	0.175624	0.51304	1.67858	0.0103477	up	AT5G65640	beta HLH protein 93
Ghir_A01G011330	1.32849	4.66045	1.96192	4.85361e-06	up	AT5G64460	Phosphoglycerate mutase family protein
Ghir_A01G011410	0.0357807	0.421143	3.67219	0.0110203	up	AT4G24510	HXXXD-type acyl-transferase family protein
Ghir_A01G011420	8.0827	1.85425	-2.01175	6.33216e-06	down	AT4G24520	P450 reductase 1
Ghir_A01G011480	2.33104	0.725113	-1.55169	0.000639613	down	AT4G38060	unknown protein; BEST Arabidopsis thaliana protein match is: unknown protein (TAIR:AT5G65480.1); Has 35333 Blast hits to 34131 proteins in 2444 species: Archae - 798; Bacteria - 22429; Metazoa - 974; Fungi - 991; Plants - 531; Viruses - 0; Other Eukaryotes - 9610 (source: NCBI BLink).
Ghir_A01G011560	8.76411	2.67001	-1.59403	0.0035964	down	AT1G34770	CONTAINS InterPro DOMAIN/s: MAGE protein (InterPro:IPR002190); Has 1274 Blast hits to 1260 proteins in 85 species: Archae - 0; Bacteria - 0; Metazoa - 1104; Fungi - 45; Plants - 49; Viruses - 0; Other Eukaryotes - 76 (source: NCBI BLink).
Ghir_A01G011630	0.643365	1.66835	1.49536	0.00492026	up	AT5G13150	exocyst subunit exo70 family protein C1
Ghir_A01G011660	10.4527	3.7653	-1.3449	3.36475e-09	down	AT2G01710	Chaperone DnaJ-domain superfamily protein
Ghir_A01G011680	1.6667	0.201268	-2.88566	0.032129	down	AT4G09040	RNA-binding (RRM/RBD/RNP motifs) family protein
Ghir_A01G011840	0.0245533	0.363815	4.04371	1.71011e-14	up	AT2G41740	villin 2
Ghir_A01G011850	4.24783	0.705952	-2.46202	1.37087e-05	down	AT3G57400	unknown protein; FUNCTIONS IN: molecular_function unknown; INVOLVED IN: N-terminal protein myristoylation; LOCATED IN: cellular_component unknown; BEST Arabidopsis thaliana protein match is: unknown protein (TAIR:AT5G52500.1); Has 38 Blast hits to 38 proteins in 7 species: Archae - 0; Bacteria - 0; Metazoa - 0; Fungi - 0; Plants - 38; Viruses - 0; Other Eukaryotes - 0 (source: NCBI BLink).
Ghir_A01G011870	5.74755	0.0388425	-7.06343	1.40457e-13	down	AT4G02570	cullin 1
Ghir_A01G011890	3.74446	9.35777	1.46707	9.09816e-13	up	AT3G10290	Nucleotide-sugar transporter family protein
Ghir_A01G011920	0.645215	0	-7.59105	1.48995e-05	down	AT1G76490	hydroxy methylglutaryl CoA reductase 1
Ghir_A01G011930	0.906416	0.075775	-3.43694	2.96444e-07	down	AT1G76490	hydroxy methylglutaryl CoA reductase 1
Ghir_A01G012000	3.6298	1.08965	-1.58973	0.000358577	down	AT1G66240	homolog of anti-oxidant 1
Ghir_A01G012170	0.195296	11.1427	5.94617	2.30843e-09	up	AT3G10525	LOSS OF GIANT CELLS FROM ORGANS
Ghir_A01G012400	0.112451	0	-6.80666	0.0109461	down	AT3G11820	syntaxin of plants 121
Ghir_A01G012430	0.0407733	6.53106	7.39873	2.86579e-30	up	AT3G10660	calmodulin-domain protein kinase cdpk isoform 2
Ghir_A01G012460	0.292454	0	-7.77593	0.000185244	down	AT3G11690	unknown protein; FUNCTIONS IN: molecular_function unknown; INVOLVED IN: biological_process unknown; LOCATED IN: chloroplast; EXPRESSED IN: 24 plant structures; EXPRESSED DURING: 15 growth stages; BEST Arabidopsis thaliana protein match is: unknown protein (TAIR:AT5G06380.1); Has 84 Blast hits to 84 proteins in 12 species: Archae - 0; Bacteria - 0; Metazoa - 0; Fungi - 0; Plants - 84; Viruses - 0;…
Ghir_A01G012480	1.33721	0	-10.6987	0.0298135	down	AT1G06820	carotenoid isomerase
Ghir_A01G012530	1.11948	5.55701	2.43662	1.47533e-11	up	AT3G11950	TRAF-like superfamily protein
Ghir_A01G012580	1.88074	0.342614	-2.2992	0.000113545	down	AT3G58040	seven in absentia of Arabidopsis 2
Ghir_A01G012620	0.297836	0.0357985	-2.81736	0.0049898	down	AT2G41940	zinc finger protein 8
Ghir_A01G012660	2.43306	0.414154	-2.44694	3.67151e-07	down	AT3G58030	RING/U-box superfamily protein
Ghir_A01G012670	0.337293	0.0402155	-2.91638	0.00521309	down	AT1G51580	RNA-binding KH domain-containing protein
Ghir_A01G012680	0.136632	0	-5.11726	0.0143409	down
Ghir_A01G012690	19.2431	3.03641	-2.53671	7.59536e-06	down	AT2G42040	CONTAINS InterPro DOMAIN/s: WRC (InterPro:IPR014977); Has 219 Blast hits to 219 proteins in 19 species: Archae - 0; Bacteria - 0; Metazoa - 3; Fungi - 0; Plants - 215; Viruses - 0; Other Eukaryotes - 1 (source: NCBI BLink).
Ghir_A01G012710	0.0168343	0.591989	5.26724	0.0219112	up	AT3G12120	fatty acid desaturase 2
Ghir_A01G012720	0.570153	0.06682	-2.8784	0.0484931	down	AT3G12120	fatty acid desaturase 2
Ghir_A01G012840	2.87488	1.03763	-1.34488	7.77041e-11	down	AT1G27700	Syntaxin/t-SNARE family protein
Ghir_A01G012920	0.571815	2.98977	2.5161	0.0405234	up	AT3G52870	IQ calmodulin-binding motif family protein
Ghir_A01G012940	5.47756	2.25256	-1.15586	3.60184e-05	down	AT5G03670	unknown protein; BEST Arabidopsis thaliana protein match is: unknown protein (TAIR:AT2G36420.1); Has 700 Blast hits to 624 proteins in 104 species: Archae - 0; Bacteria - 18; Metazoa - 333; Fungi - 60; Plants - 73; Viruses - 24; Other Eukaryotes - 192 (source: NCBI BLink).
Ghir_A01G013050	2.33446	6.91259	1.70326	0.00029832	up	AT2G37035	unknown protein; Has 26 Blast hits to 26 proteins in 11 species: Archae - 0; Bacteria - 0; Metazoa - 2; Fungi - 0; Plants - 23; Viruses - 0; Other Eukaryotes - 1 (source: NCBI BLink).
Ghir_A01G013060	6.91618	0.538088	-3.54966	0.00100207	down	AT1G24020	MLP-like protein 423
Ghir_A01G013150	0.002565	0.115605	5.71279	0.0075052	up	AT2G37010	non-intrinsic ABC protein 12
Ghir_A01G013270	8.44643	19.4083	1.35631	7.77495e-06	up	AT5G05010	clathrin adaptor complexes medium subunit family protein
Ghir_A01G013280	0.6386	0.000505	-8.97311	0.000796085	down	AT4G15090	FRS (FAR1 Related Sequences) transcription factor family
Ghir_A01G013330	4.67518	0.275734	-3.93018	0.0101232	down	AT3G12750	zinc transporter 1 precursor
Ghir_A01G013370	3.04425	9.70829	1.79902	0.000175585	up	AT2G38280	AMP deaminase, putative / myoadenylate deaminase, putative
Ghir_A01G013410	2.22885	0.717615	-1.52227	0.00039393	down	AT4G21192	Cytochrome c oxidase biogenesis protein Cmc1-like
Ghir_A01G013420	2.37001	0.179127	-3.49747	0.000210272	down
Ghir_A01G013430	0.37646	0.036863	-3.25105	0.0235447	down	AT3G53180	glutamate-ammonia ligases;catalytics;glutamate-ammonia ligases
Ghir_A01G013510	1.91031	0.271045	-2.69555	0.000358875	down	AT5G03530	RAB GTPase homolog C2A
Ghir_A01G013520	0.0119367	0.232365	4.34098	2.76565e-09	up	AT5G15680	ARM repeat superfamily protein
Ghir_A01G013540	0.106685	0	-5.50886	0.00446187	down
Ghir_A01G013550	0.171204	0	-7.33724	0.00696093	down	AT1G14700	purple acid phosphatase 3
Ghir_A01G013600	0.164624	0.514406	1.79732	0.0093931	up	AT2G01950	BRI1-like 2
Ghir_A01G013620	1.94739	0.634089	-1.46978	0.000124059	down	AT1G59960	NAD(P)-linked oxidoreductase superfamily protein
Ghir_A01G013640	0.169914	0	-28.4966	3.7532e-05	down	AT2G30070	potassium transporter 1
Ghir_A01G013680	0.0378977	0.374464	3.38622	0.0328689	up	AT2G02010	glutamate decarboxylase 4
Ghir_A01G013710	1.3962	0.143562	-3.00883	0.00257579	down
Ghir_A01G013730	5.01399	0.228369	-4.32726	1.10275e-10	down	AT1G14600	Homeodomain-like superfamily protein
Ghir_A01G013870	0.188043	0.670862	1.98267	0.00802091	up	AT1G23110	unknown protein; FUNCTIONS IN: molecular_function unknown; LOCATED IN: chloroplast; BEST Arabidopsis thaliana protein match is: unknown protein (TAIR:AT1G70900.1).
Ghir_A01G013880	0.205315	0.001861	-4.87138	0.0252961	down	AT1G23110	unknown protein; FUNCTIONS IN: molecular_function unknown; LOCATED IN: chloroplast; BEST Arabidopsis thaliana protein match is: unknown protein (TAIR:AT1G70900.1).
Ghir_A01G013920	8.70809	0.73455	-3.41661	2.36417e-06	down	AT2G01430	homeobox-leucine zipper protein 17
Ghir_A01G014030	0.175598	0	-8.09746	4.04269e-05	down	AT1G70710	glycosyl hydrolase 9B1
Ghir_A01G014070	2.53884	0	-23.9631	5.61944e-13	down	AT1G14870	PLANT CADMIUM RESISTANCE 2
Ghir_A01G014080	0.171938	0	-5.55115	0.0183186	down
Ghir_A01G014130	0.314583	0	-8.55959	0.000286427	down	AT3G17860	jasmonate-zim-domain protein 3
Ghir_A01G014150	0.172916	0.03269	-2.30196	0.00399912	down	AT1G43760	DNAse I-like superfamily protein
Ghir_A01G014180	25.9905	237.144	3.33737	1.56515e-44	up	AT5G17190	FUNCTIONS IN: molecular_function unknown; INVOLVED IN: intracellular protein transport; LOCATED IN: endomembrane system, integral to membrane, endoplasmic reticulum; EXPRESSED IN: 23 plant structures; EXPRESSED DURING: 13 growth stages; CONTAINS InterPro DOMAIN/s: B-cell receptor-associated 31-like (InterPro:IPR008417); BEST Arabidopsis thaliana protein match is: unknown protein (TAIR:AT3G03160.1…
Ghir_A01G014250	1.08151	0.064745	-3.87084	0.00083744	down	AT1G67920	unknown protein; BEST Arabidopsis thaliana protein match is: unknown protein (TAIR:AT1G24600.1); Has 22 Blast hits to 22 proteins in 5 species: Archae - 0; Bacteria - 0; Metazoa - 0; Fungi - 0; Plants - 22; Viruses - 0; Other Eukaryotes - 0 (source: NCBI BLink).
Ghir_A01G014270	0.990861	0.134563	-2.74102	1.18777e-07	down	AT2G01680	Ankyrin repeat family protein
Ghir_A01G014350	11.5627	28.9948	1.46253	1.66942e-16	up	AT1G14830	DYNAMIN-like 1C
Ghir_A01G014360	0.883543	0.137127	-2.50091	0.000431327	down
Ghir_A01G014370	0.0782887	0.955647	3.67361	0.000150855	up	AT1G68050	flavin-binding, kelch repeat, f box 1
Ghir_A01G014420	0.775263	0.0648895	-3.40852	0.0209231	down	AT3G19895	RING/U-box superfamily protein
Ghir_A01G014430	4.48031	1.54098	-1.41421	2.58265e-06	down	AT3G19900	unknown protein; FUNCTIONS IN: molecular_function unknown; INVOLVED IN: biological_process unknown; LOCATED IN: chloroplast; EXPRESSED IN: 23 plant structures; EXPRESSED DURING: 13 growth stages; CONTAINS InterPro DOMAIN/s: Protein of unknown function DUF3067 (InterPro:IPR021420); Has 276 Blast hits to 276 proteins in 83 species: Archae - 0; Bacteria - 112; Metazoa - 0; Fungi - 2; Plants - 59; Vi…
Ghir_A01G014570	0.23793	0.027346	-2.85336	0.0256017	down	AT1G13560	aminoalcoholphosphotransferase 1
Ghir_A01G014670	1.51711	9.1547	2.72531	0.000273939	up	AT1G23030	ARM repeat superfamily protein
Ghir_A01G014680	1.81646	4.06699	1.31532	0.0131917	up	AT4G38620	myb domain protein 4
Ghir_A01G014720	0.412928	0	-7.80319	0.0395206	down	AT2G01300	unknown protein; BEST Arabidopsis thaliana protein match is: unknown protein (TAIR:AT1G15010.1); Has 73 Blast hits to 73 proteins in 12 species: Archae - 0; Bacteria - 0; Metazoa - 0; Fungi - 0; Plants - 73; Viruses - 0; Other Eukaryotes - 0 (source: NCBI BLink).
Ghir_A01G014760	0.119115	0.629109	2.57027	0.0261478	up	AT5G13080	WRKY DNA-binding protein 75
Ghir_A01G014770	4.9259	0.536855	-3.05183	0.00102108	down	AT5G50570	Squamosa promoter-binding protein-like (SBP domain) transcription factor family protein
Ghir_A01G014780	0.181731	0	-7.017	0.0044304	down	AT1G27290	unknown protein; FUNCTIONS IN: molecular_function unknown; INVOLVED IN: biological_process unknown; EXPRESSED IN: 25 plant structures; EXPRESSED DURING: 15 growth stages; Has 44 Blast hits to 44 proteins in 12 species: Archae - 0; Bacteria - 0; Metazoa - 0; Fungi - 0; Plants - 44; Viruses - 0; Other Eukaryotes - 0 (source: NCBI BLink).
Ghir_A01G014790	6.88839	18.7565	1.6098	0.00205095	up	AT1G27970	nuclear transport factor 2B
Ghir_A01G014810	61.482	16.5303	-1.74327	0.0313525	down	AT1G27330	Ribosome associated membrane protein RAMP4
Ghir_A01G014860	0.501514	7.18855	3.98553	1.37791e-23	up	AT3G01860	unknown protein; FUNCTIONS IN: molecular_function unknown; INVOLVED IN: response to cadmium ion; LOCATED IN: chloroplast; EXPRESSED IN: 24 plant structures; EXPRESSED DURING: 13 growth stages; BEST Arabidopsis thaliana protein match is: unknown protein (TAIR:AT3G27210.1); Has 66 Blast hits to 66 proteins in 13 species: Archae - 0; Bacteria - 0; Metazoa - 5; Fungi - 0; Plants - 61; Viruses - 0; Ot…
Ghir_A01G014880	5.75528	1.60476	-1.72935	0.00569689	down	AT1G67480	Galactose oxidase/kelch repeat superfamily protein
Ghir_A01G014920	0.061836	0	-5.95789	0.032812	down	AT5G63380	AMP-dependent synthetase and ligase family protein
Ghir_A01G014930	1.23659	0.196657	-2.4618	1.46619e-10	down
Ghir_A01G014950	0.138078	0	-8.26447	0.00723518	down	AT1G27880	DEAD/DEAH box RNA helicase family protein
Ghir_A01G014970	0.376987	0.003948	-6.49643	0.000961242	down	AT1G13450	Homeodomain-like superfamily protein
Ghir_A01G014990	0.158039	0	-8.29209	0.00201318	down	AT3G48460	GDSL-like Lipase/Acylhydrolase superfamily protein
Ghir_A01G015030	0.593841	0.055098	-3.24298	0.0192839	down	AT1G67740	photosystem II BY
Ghir_A01G015050	10.3309	37.3424	1.97977	0.0020939	up	AT1G24510	TCP-1/cpn60 chaperonin family protein
Ghir_A01G015070	0.336642	0.0192995	-3.98541	0.0162413	down
Ghir_A01G015080	1.12729	0.030035	-4.7391	1.75308e-06	down
Ghir_A01G015090	0.5855	1.60765	1.58154	0.000950608	up	AT1G13180	Actin-like ATPase superfamily protein
Ghir_A01G015120	0.37249	0.0412995	-3.05678	0.0179913	down	AT1G24530	Transducin/WD40 repeat-like superfamily protein
Ghir_A01G015170	5.68172	11.9187	1.20732	4.65126e-15	up	AT3G26400	eukaryotic translation initiation factor 4B1
Ghir_A01G015210	1.6369	0.006893	-7.72187	2.16253e-12	down	AT1G10740	alpha/beta-Hydrolases superfamily protein
Ghir_A01G015220	6.54705	1.7224	-1.79123	4.81074e-06	down	AT1G70590	F-box family protein
Ghir_A01G015250	30.9428	69.3418	1.31434	0.000223833	up	AT1G70600	Ribosomal protein L18e/L15 superfamily protein
Ghir_A01G015310	3.01985	1.05908	-1.36932	3.77232e-07	down	AT1G23390	Kelch repeat-containing F-box family protein
Ghir_A01G015320	4.10536	0.84816	-2.1832	0.0341934	down	AT1G73805	Calmodulin binding protein-like
Ghir_A01G015360	4.47437	9.52708	1.22524	0.000583506	up	AT1G67410	Exostosin family protein
Ghir_A01G015380	0.0788327	0.587752	2.9976	3.66389e-07	up	AT1G67420	Zn-dependent exopeptidases superfamily protein
Ghir_A01G015390	0.116252	0	-5.8534	0.0101117	down	AT1G05920	Domain of unknown function (DUF313)
Ghir_A01G015440	0.365628	0	-8.99461	2.68211e-05	down	AT1G24330	ARM repeat superfamily protein
Ghir_A01G015550	4.53211	0.0715165	-5.81985	5.38564e-06	down	AT1G23420	Plant-specific transcription factor YABBY family protein
Ghir_A01G015560	9.31155	0.967287	-3.12994	1.86383e-07	down	AT3G61470	photosystem I light harvesting complex gene 2
Ghir_A01G015570	14.2802	5.46296	-1.25934	0.0115157	down	AT1G67340	HCP-like superfamily protein with MYND-type zinc finger
Ghir_A01G015650	3.79024	0.0478765	-6.06054	0.000113802	down	AT2G21180	unknown protein; BEST Arabidopsis thaliana protein match is: unknown protein (TAIR:AT5G19875.1); Has 124 Blast hits to 124 proteins in 12 species: Archae - 0; Bacteria - 0; Metazoa - 0; Fungi - 0; Plants - 124; Viruses - 0; Other Eukaryotes - 0 (source: NCBI BLink).
Ghir_A01G015660	4.16863	26.8496	2.81232	0.000370094	up	AT2G21170	triosephosphate isomerase
Ghir_A01G015690	0.145914	0.495191	1.87176	0.016902	up
Ghir_A01G015710	21.5051	106.794	2.45617	1.08252e-08	up	AT2G21140	proline-rich protein 2
Ghir_A01G015790	0.297993	0	-6.84263	0.00316605	down	AT2G21110	Disease resistance-responsive (dirigent-like protein) family protein
Ghir_A01G015830	2.57847	0.523798	-2.18725	0.0106198	down	AT2G21110	Disease resistance-responsive (dirigent-like protein) family protein
Ghir_A01G015890	0.628965	0.019668	-4.90239	1.97094e-06	down	AT4G38670	Pathogenesis-related thaumatin superfamily protein
Ghir_A01G015910	2.58591	0.493246	-2.277	0.00112507	down	AT4G38660	Pathogenesis-related thaumatin superfamily protein
Ghir_A01G015940	5.02228	18.6671	2.02441	0.000202333	up	AT4G38640	Plasma-membrane choline transporter family protein
Ghir_A01G015960	0.492359	0.019971	-3.51596	0.024482	down	AT4G38630	regulatory particle non-ATPase 10
Ghir_A01G015970	5.07541	0.839518	-2.41173	0.0405136	down	AT2G16700	actin depolymerizing factor 5
Ghir_A01G015980	1.07436	0.235602	-2.04596	1.7891e-08	down	AT4G34980	subtilisin-like serine protease 2
Ghir_A01G016000	1.42632	0.339131	-1.92799	3.1438e-05	down	AT3G09510	Ribonuclease H-like superfamily protein
Ghir_A01G016010	5.51284	16.6116	1.73092	1.02389e-06	up	AT4G38620	myb domain protein 4
Ghir_A01G016040	0.0720337	125.877	10.8982	1.18747e-47	up	AT2G16730	glycosyl hydrolase family 35 protein
Ghir_A01G016060	4.48833	0.957924	-2.10228	6.26435e-08	down	AT2G20980	minichromosome maintenance 10
Ghir_A01G016120	17.9736	0.311091	-5.70546	1.09376e-12	down	AT4G35070	SBP (S-ribonuclease binding protein) family protein
Ghir_A01G016150	0.103601	0.419297	2.20554	0.0243511	up	AT1G68010	hydroxypyruvate reductase
Ghir_A01G016160	161.773	45.0648	-1.70105	1.94238e-05	down	AT1G75950	S phase kinase-associated protein 1
Ghir_A01G016200	0.0233583	24.0843	9.89325	1.14482e-11	up	AT5G26330	Cupredoxin superfamily protein
Ghir_A01G016270	4.29928	0.695174	-2.46573	0.005814	down	AT4G30130	Protein of unknown function (DUF630 and DUF632)
Ghir_A01G016280	1.56236	0.616503	-1.20856	0.00165096	down	AT2G20920	Protein of unknown function (DUF3353)
Ghir_A01G016310	0.00443567	3.89492	9.67139	8.31278e-13	up	AT5G03570	iron regulated 2
Ghir_A01G016320	1.00738	5.48526	2.5574	7.9981e-05	up	AT2G16950	transportin 1
Ghir_A01G016470	0.847529	0.080771	-3.28878	0.0124319	down	AT1G76160	SKU5 similar 5
Ghir_A01G016490	0.061744	0.664724	3.52855	0.0210616	up	AT4G35180	LYS/HIS transporter 7
Ghir_A01G016520	27.277	1.31834	-4.28306	2.28987e-05	down	AT3G45970	expansin-like A1
Ghir_A01G016530	0.0389233	0	-5.28552	0.00946913	down	AT4G35190	Putative lysine decarboxylase family protein
Ghir_A01G016720	3.7947	9.19612	1.40623	0.0034975	up	AT5G42340	Plant U-Box 15
Ghir_A01G016760	0.687335	0.029205	-4.14501	0.00956627	down
Ghir_A01G016780	2.73523	0.559006	-2.13952	0.0279634	down	AT4G35270	Plant regulator RWP-RK family protein
Ghir_A01G016950	8.11464	3.22936	-1.17548	0.00200826	down	AT1G11400	partner of Y14-MAGO
Ghir_A01G016970	2.5914	0.248105	-3.27708	1.92936e-09	down	AT3G49430	SER/ARG-rich protein 34A
Ghir_A01G017070	0.251258	1.37051	2.62127	0.0268849	up	AT1G25290	RHOMBOid-like protein 10
Ghir_A01G017120	0.289565	0	-8.16907	1.7355e-06	down	AT5G47160	YDG/SRA domain-containing protein
Ghir_A01G017160	0.30212	0.02178	-3.68102	0.0247792	down	AT5G64500	Major facilitator superfamily protein
Ghir_A01G017180	0.033995	0.653699	4.38216	0.0338721	up	AT2G14255	Ankyrin repeat family protein with DHHC zinc finger domain
Ghir_A01G017200	11.4343	42.8379	2.04685	1.75028e-17	up	AT5G64510	unknown protein; FUNCTIONS IN: molecular_function unknown; INVOLVED IN: biological_process unknown; LOCATED IN: endomembrane system; EXPRESSED IN: 17 plant structures; EXPRESSED DURING: 10 growth stages; Has 35333 Blast hits to 34131 proteins in 2444 species: Archae - 798; Bacteria - 22429; Metazoa - 974; Fungi - 991; Plants - 531; Viruses - 0; Other Eukaryotes - 9610 (source: NCBI BLink).
Ghir_A01G017220	2.58258	16.3732	2.81767	3.87228e-05	up	AT5G27470	seryl-tRNA synthetase / serine--tRNA ligase
Ghir_A01G017250	0.839334	0.204421	-1.91634	0.0138933	down	AT4G33700	CBS domain-containing protein with a domain of unknown function (DUF21)
Ghir_A01G017330	9.94991	3.18358	-1.51753	4.04269e-05	down	AT1G71430	unknown protein; FUNCTIONS IN: molecular_function unknown; INVOLVED IN: biological_process unknown; LOCATED IN: cellular_component unknown; EXPRESSED IN: 23 plant structures; EXPRESSED DURING: 13 growth stages; Has 64 Blast hits to 64 proteins in 28 species: Archae - 0; Bacteria - 0; Metazoa - 14; Fungi - 6; Plants - 42; Viruses - 0; Other Eukaryotes - 2 (source: NCBI BLink).
Ghir_A01G017340	5.48056	14.4202	1.52766	0.00223496	up	AT3G19680	Protein of unknown function (DUF1005)
Ghir_A01G017370	0.0255413	0	-5.22915	0.0438491	down	AT5G66600	Protein of unknown function, DUF547
Ghir_A01G017380	10.9615	4.25437	-1.22527	0.00517582	down	AT2G16070	plastid division2
Ghir_A01G017500	1.51852	0.150195	-3.20301	3.2676e-05	down	AT1G71900	Protein of unknown function (DUF803)
Ghir_A01G017610	11.0533	29.4459	1.56029	5.06795e-15	up	AT4G24330	Protein of unknown function (DUF1682)
Ghir_A01G017710	0.113162	0.0015855	-4.73801	0.010912	down	AT1G61580	R-protein L3 B
Ghir_A01G017720	0.492372	0	-8.77936	1.47314e-06	down	AT1G09812	unknown protein; BEST Arabidopsis thaliana protein match is: unknown protein (TAIR:AT1G58007.2); Has 93 Blast hits to 93 proteins in 13 species: Archae - 0; Bacteria - 0; Metazoa - 0; Fungi - 0; Plants - 93; Viruses - 0; Other Eukaryotes - 0 (source: NCBI BLink).
Ghir_A01G017760	0.082321	0	-6.42129	0.0134066	down	AT2G01050	zinc ion binding;nucleic acid binding
Ghir_A01G017810	0.585363	1.28723	1.27766	0.0128708	up	AT1G57770	FAD/NAD(P)-binding oxidoreductase family protein
Ghir_A01G017850	0.790815	0.004354	-6.13435	0.00248958	down
Ghir_A01G017910	0.627701	2.06623	1.87852	0.000376264	up	AT1G68330	unknown protein; BEST Arabidopsis thaliana protein match is: unknown protein (TAIR:AT1G48780.1); Has 155 Blast hits to 147 proteins in 23 species: Archae - 0; Bacteria - 0; Metazoa - 19; Fungi - 3; Plants - 126; Viruses - 0; Other Eukaryotes - 7 (source: NCBI BLink).
Ghir_A01G018010	0.0281293	0.833873	4.90534	0.0338411	up	AT4G08570	Heavy metal transport/detoxification superfamily protein
Ghir_A01G018020	0.256567	0.0225535	-3.41753	0.0106612	down	AT4G08550	electron carriers;protein disulfide oxidoreductases
Ghir_A01G018040	2.03456	0.748163	-1.32435	0.00124527	down	AT1G77930	Chaperone DnaJ-domain superfamily protein
Ghir_A01G018060	5.60883	15.8467	1.63947	3.3879e-09	up	AT1G36730	Translation initiation factor IF2/IF5
Ghir_A01G018110	0.763014	0.0073885	-6.60393	5.08411e-08	down	AT1G37130	nitrate reductase 2
Ghir_A01G018140	0.169734	0	-7.74594	0.04658	down	AT1G44820	Peptidase M20/M25/M40 family protein
Ghir_A01G018160	0.163784	0.507115	1.75023	0.00436041	up	AT4G08300	nodulin MtN21 /EamA-like transporter family protein
Ghir_A01G018170	3.41099	1.45266	-1.10081	0.00715086	down	AT1G44770	unknown protein; BEST Arabidopsis thaliana protein match is: unknown protein (TAIR:AT5G49710.3); Has 81 Blast hits to 81 proteins in 17 species: Archae - 0; Bacteria - 0; Metazoa - 0; Fungi - 0; Plants - 81; Viruses - 0; Other Eukaryotes - 0 (source: NCBI BLink).
Ghir_A01G018180	0.120682	0	-6.76735	0.000683887	down	AT1G76450	Photosystem II reaction center PsbP family protein
Ghir_A01G018210	1.5975	0.592943	-1.29061	0.0015182	down	AT1G21830	unknown protein; CONTAINS InterPro DOMAIN/s: Protein of unknown function DUF740 (InterPro:IPR008004); BEST Arabidopsis thaliana protein match is: unknown protein (TAIR:AT1G44608.1); Has 49 Blast hits to 49 proteins in 12 species: Archae - 0; Bacteria - 0; Metazoa - 0; Fungi - 0; Plants - 49; Viruses - 0; Other Eukaryotes - 0 (source: NCBI BLink).
Ghir_A01G018220	2.39725	0.764479	-1.53403	0.00139999	down	AT4G08330	unknown protein; FUNCTIONS IN: molecular_function unknown; INVOLVED IN: biological_process unknown; LOCATED IN: plasma membrane; EXPRESSED IN: 24 plant structures; EXPRESSED DURING: 14 growth stages; BEST Arabidopsis thaliana protein match is: unknown protein (TAIR:AT2G17705.1); Has 98 Blast hits to 98 proteins in 13 species: Archae - 0; Bacteria - 0; Metazoa - 0; Fungi - 0; Plants - 98; Viruses …
Ghir_A01G018250	0.871653	1.67636	1.0682	0.000743306	up	AT5G54160	O-methyltransferase 1
Ghir_A01G018260	3.2067	14.4493	2.31601	8.61247e-23	up	AT5G54160	O-methyltransferase 1
Ghir_A01G018300	0.882693	0.166676	-2.26795	0.0223037	down	AT5G44600	S-adenosyl-L-methionine-dependent methyltransferases superfamily protein
Ghir_A01G018330	0.355938	0	-7.67259	0.000203871	down	AT1G21550	Calcium-binding EF-hand family protein
Ghir_A01G018400	2.17543	6.41383	1.69308	1.44048e-07	up	AT5G06700	Plant protein of unknown function (DUF828)
Ghir_A01G018480	0.479916	0.965502	1.17416	0.0340593	up	AT3G12100	Cation efflux family protein
Ghir_A01G018490	6.8236	1.92923	-1.69985	0.0277871	down	AT2G42110	unknown protein; Has 27 Blast hits to 27 proteins in 11 species: Archae - 0; Bacteria - 0; Metazoa - 0; Fungi - 0; Plants - 25; Viruses - 0; Other Eukaryotes - 2 (source: NCBI BLink).
Ghir_A01G018560	19.5342	66.9873	1.92115	3.27243e-09	up	AT2G42210	Mitochondrial import inner membrane translocase subunit Tim17/Tim22/Tim23 family protein
Ghir_A01G018600	0.453632	0.061793	-2.68429	0.041523	down	AT5G06790	unknown protein; FUNCTIONS IN: molecular_function unknown; INVOLVED IN: biological_process unknown; LOCATED IN: chloroplast; EXPRESSED IN: 9 plant structures; EXPRESSED DURING: LP.04 four leaves visible, LP.02 two leaves visible, petal differentiation and expansion stage, D bilateral stage; BEST Arabidopsis thaliana protein match is: unknown protein (TAIR:AT3G57950.1); Has 1807 Blast hits to 1807…
Ghir_A01G018640	14.7443	1.87536	-2.86208	0.0250655	down	AT3G10310	P-loop nucleoside triphosphate hydrolases superfamily protein with CH (Calponin Homology) domain
Ghir_A01G018670	10.7649	3.78325	-1.35875	0.0165323	down
Ghir_A01G018680	98.0194	9.38826	-3.2535	2.7023e-24	down	AT2G41010	calmodulin (CAM)-binding protein of 25 kDa
Ghir_A01G018750	5.45467	10.9014	1.14457	0.00327237	up	AT2G41410	Calcium-binding EF-hand family protein
Ghir_A01G018780	0	0.095201	7.83448	0.00131689	up	AT3G57200	unknown protein; BEST Arabidopsis thaliana protein match is: unknown protein (TAIR:AT2G41451.1); Has 94 Blast hits to 94 proteins in 31 species: Archae - 0; Bacteria - 12; Metazoa - 0; Fungi - 0; Plants - 77; Viruses - 0; Other Eukaryotes - 5 (source: NCBI BLink).
Ghir_A01G018800	0.771936	0	-8.01662	9.62257e-06	down	AT1G52970	downregulated in DIF1 11
Ghir_A01G018830	1.75391	5.87128	1.89701	0.00822355	up	AT2G41290	strictosidine synthase-like 2
Ghir_A01G018850	0.230951	0	-8.21156	7.87889e-06	down	AT5G06839	bZIP transcription factor family protein
Ghir_A01G018870	2.83861	6.59339	1.38351	0.00115851	up	AT3G12150	unknown protein; CONTAINS InterPro DOMAIN/s: Protein of unknown function DUF2048 (InterPro:IPR019149); Has 421 Blast hits to 334 proteins in 155 species: Archae - 2; Bacteria - 147; Metazoa - 215; Fungi - 0; Plants - 43; Viruses - 0; Other Eukaryotes - 14 (source: NCBI BLink).
Ghir_A01G019000	5.18532	0.603119	-2.9899	0.0190457	down	AT3G18140	Transducin/WD40 repeat-like superfamily protein
Ghir_A01G019010	0.508079	4.57518	3.3448	4.47494e-05	up	AT3G57650	lysophosphatidyl acyltransferase 2
Ghir_A01G019060	5.4414	57.0002	3.54548	7.53713e-32	up	AT1G01170	Protein of unknown function (DUF1138)
Ghir_A01G019070	3.6936	39.0675	3.5247	1.14456e-06	up	AT2G41740	villin 2
Ghir_A01G019110	1.54042	7.81952	2.47058	1.40138e-06	up	AT1G76730	NagB/RpiA/CoA transferase-like superfamily protein
Ghir_A01G019130	13.6915	44.657	1.85689	2.45441e-06	up	AT1G43710	Pyridoxal phosphate (PLP)-dependent transferases superfamily protein
Ghir_A01G019140	3.29729	1.42366	-1.06063	0.000146277	down	AT1G21200	sequence-specific DNA binding transcription factors
Ghir_A01G019210	20.1775	47.9875	1.39154	5.58003e-15	up	AT3G58500	protein phosphatase 2A-4
Ghir_A01G019260	10.5131	1.78999	-2.42223	1.8537e-17	down	AT3G11890	Sterile alpha motif (SAM) domain-containing protein
Ghir_A01G019290	0.78827	0	-25.186	0.000105274	down	AT3G54750	unknown protein; FUNCTIONS IN: molecular_function unknown; INVOLVED IN: biological_process unknown; LOCATED IN: cellular_component unknown; EXPRESSED IN: 24 plant structures; EXPRESSED DURING: 15 growth stages.
Ghir_A01G019380	7.407	42.2085	2.6631	3.39713e-12	up	AT3G44150	unknown protein; FUNCTIONS IN: molecular_function unknown; INVOLVED IN: biological_process unknown; LOCATED IN: plasma membrane; EXPRESSED IN: cultured cell; BEST Arabidopsis thaliana protein match is: unknown protein (TAIR:AT3G11800.1); Has 76 Blast hits to 75 proteins in 19 species: Archae - 0; Bacteria - 0; Metazoa - 0; Fungi - 0; Plants - 74; Viruses - 0; Other Eukaryotes - 2 (source: NCBI BL…
Ghir_A01G019410	0.002412	0.0436545	4.12998	0.00949293	up	AT1G74360	Leucine-rich repeat protein kinase family protein
Ghir_A01G019460	3.17888	0.391195	-2.92625	0.00390017	down	AT2G35930	plant U-box 23
Ghir_A01G019520	3.22323	1.34635	-1.13458	0.000265664	down	AT5G06340	nudix hydrolase homolog 27
Ghir_A01G019530	18.7585	3.31532	-2.37689	0.00280558	down	AT2G35950	embryo sac development arrest 12
Ghir_A01G019570	6.79356	0.551903	-3.45657	0.0273708	down	AT2G35980	Late embryogenesis abundant (LEA) hydroxyproline-rich glycoprotein family
Ghir_A01G019580	0.819909	2.46264	1.7083	0.0460609	up	AT3G52500	Eukaryotic aspartyl protease family protein
Ghir_A01G019650	4.59881	1.72935	-1.24527	0.0329172	down	AT3G11600	unknown protein; FUNCTIONS IN: molecular_function unknown; INVOLVED IN: response to karrikin; EXPRESSED IN: 21 plant structures; EXPRESSED DURING: 12 growth stages; BEST Arabidopsis thaliana protein match is: unknown protein (TAIR:AT5G06270.1); Has 171 Blast hits to 171 proteins in 15 species: Archae - 0; Bacteria - 0; Metazoa - 0; Fungi - 0; Plants - 171; Viruses - 0; Other Eukaryotes - 0 (sourc…
Ghir_A01G019670	0.216728	0	-7.45575	0.00902489	down	AT1G52340	NAD(P)-binding Rossmann-fold superfamily protein
Ghir_A01G019770	19.6979	3.62136	-2.31174	5.12241e-07	down	AT2G36130	Cyclophilin-like peptidyl-prolyl cis-trans isomerase family protein
Ghir_A01G019790	0.450668	0	-8.45692	0.0197758	down	AT5G22380	NAC domain containing protein 90
Ghir_A01G019830	0.585532	0	-24.1537	0.000599944	down	AT2G36200	P-loop containing nucleoside triphosphate hydrolases superfamily protein
Ghir_A01G019840	10.91	2.36409	-2.05598	0.00274366	down	AT2G23930	probable small nuclear ribonucleoprotein G
Ghir_A01G019850	0.942361	9.7192	3.51827	1.96375e-23	up	AT5G22400	Rho GTPase activating protein with PAK-box/P21-Rho-binding domain
Ghir_A01G019880	0	0.621484	9.85118	5.03851e-09	up	AT3G01320	SIN3-like 1
Ghir_A01G019890	8.52727	3.6162	-1.10918	5.07994e-08	down	AT1G57790	F-box family protein
Ghir_A01G019900	12.5626	5.31566	-1.08908	0.00609016	down	AT3G52710	unknown protein; FUNCTIONS IN: molecular_function unknown; INVOLVED IN: biological_process unknown; LOCATED IN: plasma membrane; EXPRESSED IN: 19 plant structures; EXPRESSED DURING: 9 growth stages; BEST Arabidopsis thaliana protein match is: unknown protein (TAIR:AT2G36220.1); Has 64 Blast hits to 64 proteins in 10 species: Archae - 0; Bacteria - 0; Metazoa - 0; Fungi - 0; Plants - 64; Viruses -…
Ghir_A01G019920	0.163233	0	-6.18425	0.00336828	down	AT3G10120	unknown protein; BEST Arabidopsis thaliana protein match is: unknown protein (TAIR:AT5G03890.1); Has 57 Blast hits to 57 proteins in 10 species: Archae - 0; Bacteria - 0; Metazoa - 0; Fungi - 0; Plants - 57; Viruses - 0; Other Eukaryotes - 0 (source: NCBI BLink).
Ghir_A01G019990	0.421053	0.0874755	-2.14269	0.000196593	down	AT2G36270	Basic-leucine zipper (bZIP) transcription factor family protein
Ghir_A01G020000	8.02213	17.1383	1.23742	8.75387e-08	up	AT3G52760	Integral membrane Yip1 family protein
Ghir_A01G020020	89.17	3.50731	-4.53257	9.89649e-15	down	AT2G36320	A20/AN1-like zinc finger family protein
Ghir_A01G020060	55.1317	17.9351	-1.46646	0.000890305	down	AT3G44590	60S acidic ribosomal protein family
Ghir_A01G020070	13.3232	64.3526	2.42894	6.77953e-15	up	AT3G52880	monodehydroascorbate reductase 1
Ghir_A01G020090	31.8787	7.66796	-1.92356	1.83211e-05	down	AT2G36410	Family of unknown function (DUF662)
Ghir_A01G020100	2.48241	0.81218	-1.49847	0.000792009	down	AT5G03670	unknown protein; BEST Arabidopsis thaliana protein match is: unknown protein (TAIR:AT2G36420.1); Has 700 Blast hits to 624 proteins in 104 species: Archae - 0; Bacteria - 18; Metazoa - 333; Fungi - 60; Plants - 73; Viruses - 24; Other Eukaryotes - 192 (source: NCBI BLink).
Ghir_A01G020130	2.65788	0.770573	-1.6561	0.000253605	down	AT5G03680	Duplicated homeodomain-like superfamily protein
Ghir_A01G020160	3.66892	0.652821	-2.35381	0.00271016	down	AT3G44735	PHYTOSULFOKINE 3 PRECURSOR
Ghir_A01G020200	66.3929	154.808	1.36535	5.5338e-17	up	AT2G36530	Enolase
Ghir_A01G020250	13.1812	35.1764	1.56876	9.82124e-05	up	AT3G52990	Pyruvate kinase family protein
Ghir_A01G020350	0.868587	0.159471	-2.34888	0.0475804	down	AT5G03795	Exostosin family protein
Ghir_A01G020490	100.731	985.769	3.43591	2.30877e-22	up	AT2G36830	gamma tonoplast intrinsic protein
Ghir_A01G020530	0.241627	1.04063	2.19948	0.0124156	up	AT2G36840	ACT-like superfamily protein
Ghir_A01G020580	12.159	1.97532	-2.45229	0.000385542	down	AT2G36930	zinc finger (C2H2 type) family protein
Ghir_A01G020740	0.673237	3.21582	2.43156	0.00552304	up	AT3G09760	RING/U-box superfamily protein
Ghir_A01G020760	7.63958	20.3482	1.55671	1.95243e-15	up	AT3G09740	syntaxin of plants 71
Ghir_A01G020770	0.25766	0.0101145	-4.37407	5.71909e-05	down	AT3G09660	minichromosome maintenance 8
Ghir_A01G020780	0.263888	8e-06	-8.45508	0.00528666	down	AT3G23620	Ribosomal RNA processing Brix domain protein
Ghir_A01G020810	20.8065	44.4547	1.24528	3.59661e-05	up	AT2G37120	S1FA-like DNA-binding protein
Ghir_A01G020820	9.24345	57.1549	2.76981	5.62304e-38	up	AT2G37110	PLAC8 family protein
Ghir_A01G020830	0.0712113	15.5185	7.8264	7.18201e-63	up	AT5G03120	unknown protein; FUNCTIONS IN: molecular_function unknown; INVOLVED IN: biological_process unknown; LOCATED IN: endomembrane system; EXPRESSED IN: 21 plant structures; EXPRESSED DURING: 13 growth stages; Has 14 Blast hits to 14 proteins in 4 species: Archae - 0; Bacteria - 0; Metazoa - 0; Fungi - 0; Plants - 14; Viruses - 0; Other Eukaryotes - 0 (source: NCBI BLink).
Ghir_A01G020840	2.9754	5.75827	1.09644	0.00149436	up	AT5G03040	IQ-domain 2
Ghir_A01G020850	2.04951	6.34169	1.75073	0.00802298	up	AT2G35795	Chaperone DnaJ-domain superfamily protein
Ghir_A01G020890	32.0502	90.0972	1.64637	0.0201151	up	AT5G02960	Ribosomal protein S12/S23 family protein
Ghir_A01G020910	4.18319	0.293583	-3.68949	0.0117981	down	AT5G02950	Tudor/PWWP/MBT superfamily protein
Ghir_A01G020920	0.619777	0.092011	-2.54387	0.00141992	down	AT1G49390	2-oxoglutarate (2OG) and Fe(II)-dependent oxygenase superfamily protein
Ghir_A01G021000	8.77403	1.95272	-2.05864	9.03652e-05	down	AT2G20280	Zinc finger C-x8-C-x5-C-x3-H type family protein
Ghir_A01G021020	0.0841557	0.010966	-2.73691	0.00992331	down	AT2G37290	Ypt/Rab-GAP domain of gyp1p superfamily protein
Ghir_A01G021120	0.0941433	0	-6.23551	0.00519864	down	AT5G02640	unknown protein; BEST Arabidopsis thaliana protein match is: unknown protein (TAIR:AT3G46300.1); Has 37 Blast hits to 37 proteins in 10 species: Archae - 0; Bacteria - 0; Metazoa - 0; Fungi - 0; Plants - 37; Viruses - 0; Other Eukaryotes - 0 (source: NCBI BLink).
Ghir_A01G021140	9.19126	39.2298	2.23719	5.3861e-34	up	AT3G53520	UDP-glucuronic acid decarboxylase 1
Ghir_A01G021220	70.7282	11.4717	-2.48775	3.65346e-10	down	AT5G02560	histone H2A 12
Ghir_A01G021230	254.993	57.3196	-2.03579	0.0041424	down	AT5G02560	histone H2A 12
Ghir_A01G021240	11.7742	2.07057	-2.36521	7.75835e-06	down	AT2G37510	RNA-binding (RRM/RBD/RNP motifs) family protein
Ghir_A01G021310	10.1115	23.5868	1.3562	3.31477e-12	up	AT2G37550	ARF-GAP domain 7
Ghir_A01G021330	0.0327357	0.338857	3.4075	0.00377806	up	AT3G53720	cation/H+ exchanger 20
Ghir_A01G021390	0.130999	0.415467	1.82698	0.043305	up	AT3G53950	glyoxal oxidase-related protein
Ghir_A01G021400	1.76331	0.502351	-1.69064	0.00649279	down	AT5G02030	POX (plant homeobox) family protein
Ghir_A01G021510	0.059967	0.939855	4.11355	0.000158005	up	AT5G60020	laccase 17
Ghir_A01G021550	0.686765	8.28334	3.70452	0.0485027	up	AT5G02230	Haloacid dehalogenase-like hydrolase (HAD) superfamily protein
Ghir_A01G021580	25.7167	324.208	3.7298	0.037722	up	AT3G09390	metallothionein 2A
Ghir_A01G021590	0.492712	1.38412	1.61645	0.00136159	up	AT3G09410	Pectinacetylesterase family protein
Ghir_A01G021630	0	0.130786	8.69655	0.0217675	up	AT5G02430	Transducin/WD40 repeat-like superfamily protein
Ghir_A01G021640	4.50564	0.171572	-4.59309	0.000268221	down	AT4G02570	cullin 1
Ghir_A01G021650	2.96205	0.250898	-3.41239	0.000132648	down	AT3G19760	eukaryotic initiation factor 4A-III
Ghir_A01G021790	1.57839	0.180149	-3.0421	0.000246941	down	AT2G37960	unknown protein; FUNCTIONS IN: molecular_function unknown; INVOLVED IN: biological_process unknown; LOCATED IN: cellular_component unknown; BEST Arabidopsis thaliana protein match is: unknown protein (TAIR:AT3G54060.2); Has 30201 Blast hits to 17322 proteins in 780 species: Archae - 12; Bacteria - 1396; Metazoa - 17338; Fungi - 3422; Plants - 5037; Viruses - 0; Other Eukaryotes - 2996 (source: NC…
Ghir_A01G022040	1.96239	5.07344	1.49429	0.000128264	up	AT3G08960	ARM repeat superfamily protein
Ghir_A01G022140	3.92165	13.9348	1.97507	2.46706e-20	up	AT5G01410	Aldolase-type TIM barrel family protein
Ghir_A01G022170	0.863277	0.335096	-1.21368	0.000473564	down	AT3G51870	Mitochondrial substrate carrier family protein
Ghir_A01G022180	4.17578	1.36903	-1.46819	0.00874886	down	AT3G51880	high mobility group B1
Ghir_A01G022190	0.375826	0.0240245	-3.82867	0.00119259	down	AT3G08940	light harvesting complex photosystem II
Ghir_A01G022250	1.90871	7.09616	2.03518	7.21822e-16	up	AT3G51790	transmembrane protein G1P-related 1
Ghir_A01G022310	5.82136	0.654084	-2.9998	5.50861e-07	down	AT3G08880	unknown protein; BEST Arabidopsis thaliana protein match is: unknown protein (TAIR:AT5G01570.1); Has 177 Blast hits to 175 proteins in 60 species: Archae - 4; Bacteria - 33; Metazoa - 18; Fungi - 11; Plants - 59; Viruses - 0; Other Eukaryotes - 52 (source: NCBI BLink).
Ghir_A01G022320	4.18855	0.97873	-1.9679	0.00133874	down	AT5G01590	unknown protein; FUNCTIONS IN: molecular_function unknown; INVOLVED IN: biological_process unknown; LOCATED IN: chloroplast, chloroplast envelope; EXPRESSED IN: 22 plant structures; EXPRESSED DURING: 13 growth stages; Has 60 Blast hits to 59 proteins in 31 species: Archae - 0; Bacteria - 20; Metazoa - 1; Fungi - 2; Plants - 33; Viruses - 0; Other Eukaryotes - 4 (source: NCBI BLink).
Ghir_A01G022350	8.67542	2.13119	-1.90175	9.49926e-05	down	AT2G38310	PYR1-like 4
Ghir_A01G022360	0.161896	0.0015505	-6.03129	0.00184646	down	AT2G38320	TRICHOME BIREFRINGENCE-LIKE 34
Ghir_A01G022370	0.308702	0.0735705	-1.96352	0.0182253	down	AT2G38330	MATE efflux family protein
Ghir_A01G022380	8.23204	20.4022	1.44904	0.00149431	up	AT3G08780	unknown protein; FUNCTIONS IN: molecular_function unknown; INVOLVED IN: biological_process unknown; LOCATED IN: cellular_component unknown; EXPRESSED IN: male gametophyte, cultured cell; EXPRESSED DURING: L mature pollen stage, M germinated pollen stage; Has 129 Blast hits to 129 proteins in 38 species: Archae - 0; Bacteria - 0; Metazoa - 96; Fungi - 0; Plants - 31; Viruses - 0; Other Eukaryotes …
Ghir_A01G022390	25.7227	163.127	2.80216	4.27159e-15	up	AT2G38360	prenylated RAB acceptor 1.B4
Ghir_A01G022410	0.327225	0	-8.09488	3.01628e-06	down	AT3G51670	SEC14 cytosolic factor family protein / phosphoglyceride transfer family protein
Ghir_A01G022420	0.262838	6.1436	4.65603	1.03174e-12	up	AT2G38480	Uncharacterised protein family (UPF0497)
Ghir_A01G022430	5.78033	1.53683	-1.80273	0.0119379	down	AT5G01720	RNI-like superfamily protein
Ghir_A01G022540	0.124875	0.618121	2.38304	0.0371618	up	AT4G35090	catalase 2
Ghir_A01G022560	0.0178607	1.4647	6.49376	1.06623e-10	up	AT5G42340	Plant U-Box 15
Ghir_A01G022580	30.0936	12.5317	-1.11988	0.00615735	down	AT1G20580	Small nuclear ribonucleoprotein family protein
Ghir_A01G022680	3.17302	6.63823	1.23994	0.0249255	up	AT1G76270	O-fucosyltransferase family protein
Ghir_A01G022690	2.93523	0.484056	-2.48731	0.00173459	down	AT1G42430	unknown protein; BEST Arabidopsis thaliana protein match is: unknown protein (TAIR:AT3G55760.3); Has 186 Blast hits to 143 proteins in 47 species: Archae - 0; Bacteria - 23; Metazoa - 14; Fungi - 6; Plants - 87; Viruses - 0; Other Eukaryotes - 56 (source: NCBI BLink).
Ghir_A01G022720	0.031012	0.454317	3.83862	0.0157671	up	AT1G76240	Arabidopsis protein of unknown function (DUF241)
Ghir_A01G022860	3.4972	29.4814	3.21782	1.7349e-11	up	AT3G58120	Basic-leucine zipper (bZIP) transcription factor family protein
Ghir_A01G022910	0.868672	0.187093	-2.06021	0.00106942	down	AT5G46020	CONTAINS InterPro DOMAIN/s: Casein kinase substrate, phosphoprotein PP28 (InterPro:IPR019380); Has 30201 Blast hits to 17322 proteins in 780 species: Archae - 12; Bacteria - 1396; Metazoa - 17338; Fungi - 3422; Plants - 5037; Viruses - 0; Other Eukaryotes - 2996 (source: NCBI BLink).
Ghir_A01G022950	30.4884	2.80567	-3.32663	1.8375e-05	down	AT3G15095	unknown protein; FUNCTIONS IN: molecular_function unknown; INVOLVED IN: biological_process unknown; EXPRESSED IN: 22 plant structures; EXPRESSED DURING: 13 growth stages; Has 30201 Blast hits to 17322 proteins in 780 species: Archae - 12; Bacteria - 1396; Metazoa - 17338; Fungi - 3422; Plants - 5037; Viruses - 0; Other Eukaryotes - 2996 (source: NCBI BLink).
Ghir_A01G023060	35.172	96.8565	1.60884	2.21316e-20	up	AT3G59920	RAB GDP dissociation inhibitor 2
Ghir_A01G023100	0.484518	0.040151	-3.43895	0.00477801	down	AT1G30950	F-box family protein
Ghir_A02G000020	3.48251	1.14928	-1.45727	0.0407544	down
Ghir_A02G000050	3.78798	1.3827	-1.32264	0.000132082	down	AT2G28330	unknown protein; BEST Arabidopsis thaliana protein match is: unknown protein (TAIR:AT1G08035.1); Has 18 Blast hits to 18 proteins in 6 species: Archae - 0; Bacteria - 0; Metazoa - 0; Fungi - 0; Plants - 18; Viruses - 0; Other Eukaryotes - 0 (source: NCBI BLink).
Ghir_A02G000060	5.95293	11.1332	1.04288	0.00717633	up	AT5G01010	CONTAINS InterPro DOMAIN/s: GOLD (InterPro:IPR009038); Has 172 Blast hits to 172 proteins in 43 species: Archae - 0; Bacteria - 0; Metazoa - 95; Fungi - 0; Plants - 63; Viruses - 0; Other Eukaryotes - 14 (source: NCBI BLink).
Ghir_A02G000150	0.0581867	0	-5.45971	0.0287646	down	AT5G01990	Auxin efflux carrier family protein
Ghir_A02G000170	6.4631	30.1612	2.35703	1.49485e-30	up	AT2G38610	RNA-binding KH domain-containing protein
Ghir_A02G000210	1.13095	3.18789	1.63275	0.00571692	up	AT3G08650	ZIP metal ion transporter family
Ghir_A02G000220	0.710564	0.118968	-2.45986	0.0300925	down	AT5G01950	Leucine-rich repeat protein kinase family protein
Ghir_A02G000260	1.59466	4.84578	1.74151	6.61201e-09	up	AT3G08670	unknown protein; BEST Arabidopsis thaliana protein match is: unknown protein (TAIR:AT3G51540.1); Has 48380 Blast hits to 29827 proteins in 1356 species: Archae - 46; Bacteria - 5589; Metazoa - 17361; Fungi - 13192; Plants - 2237; Viruses - 905; Other Eukaryotes - 9050 (source: NCBI BLink).
Ghir_A02G000290	0.629434	0.194248	-1.56725	0.00405188	down	AT5G01920	Protein kinase superfamily protein
Ghir_A02G000300	5.13276	2.23128	-1.09043	0.00607102	down	AT2G38570	CONTAINS InterPro DOMAIN/s: PRC-barrel-like (InterPro:IPR011033); Has 300 Blast hits to 300 proteins in 81 species: Archae - 0; Bacteria - 135; Metazoa - 0; Fungi - 0; Plants - 37; Viruses - 0; Other Eukaryotes - 128 (source: NCBI BLink).
Ghir_A02G000310	1.63237	0.299007	-2.35241	0.00992117	down	AT5G01910	unknown protein; Has 66 Blast hits to 66 proteins in 27 species: Archae - 0; Bacteria - 2; Metazoa - 18; Fungi - 7; Plants - 29; Viruses - 0; Other Eukaryotes - 10 (source: NCBI BLink).
Ghir_A02G000500	0.654738	0.175666	-1.74935	0.00294029	down	AT5G01830	ARM repeat superfamily protein
Ghir_A02G000510	0.364442	0	-8.31619	2.54239e-05	down	AT5G01820	serine/threonine protein kinase 1
Ghir_A02G000620	2.43012	5.25993	1.256	0.000343471	up	AT3G51710	D-mannose binding lectin protein with Apple-like carbohydrate-binding domain
Ghir_A02G000630	11.8067	2.40374	-2.14234	1.41214e-05	down	AT3G08860	PYRIMidINE 4
Ghir_A02G000660	0	0.417895	8.37258	0.0451136	up
Ghir_A02G000670	0	1.98446	11.2076	2.82765e-18	up	AT3G03080	Zinc-binding dehydrogenase family protein
Ghir_A02G000710	26.751	74.7054	1.63171	1.04618e-11	up	AT5G16990	Zinc-binding dehydrogenase family protein
Ghir_A02G000900	1.39285	0.092474	-3.83943	0.00956315	down	AT3G59770	sacI homology domain-containing protein / WW domain-containing protein
Ghir_A02G000960	4.66036	10.0687	1.2596	0.0286982	up	AT2G43790	MAP kinase 6
Ghir_A02G001000	0	0.781527	28.6559	2.7993e-05	up	AT1G43760	DNAse I-like superfamily protein
Ghir_A02G001070	0.173372	0	-7.02432	0.00212401	down
Ghir_A02G001110	0.240015	1.31884	2.57812	3.29841e-07	up	AT3G59690	IQ-domain 13
Ghir_A02G001130	2.44807	0.625216	-1.83141	3.50938e-06	down	AT3G59660	C2 domain-containing protein / GRAM domain-containing protein
Ghir_A02G001140	18.2308	4.6643	-1.81705	0.00992439	down	AT1G05710	basic helix-loop-helix (bHLH) DNA-binding superfamily protein
Ghir_A02G001190	7.95014	31.1322	2.10927	5.55765e-13	up	AT3G08590	Phosphoglycerate mutase, 2,3-bisphosphoglycerate-independent
Ghir_A02G001200	2.80332	1.21868	-1.07434	0.0117366	down	AT5G40520	unknown protein; FUNCTIONS IN: molecular_function unknown; INVOLVED IN: biological_process unknown; LOCATED IN: cellular_component unknown; EXPRESSED IN: 23 plant structures; EXPRESSED DURING: 11 growth stages; Has 3696 Blast hits to 2485 proteins in 391 species: Archae - 10; Bacteria - 571; Metazoa - 1013; Fungi - 530; Plants - 217; Viruses - 74; Other Eukaryotes - 1281 (source: NCBI BLink).
Ghir_A02G001260	0.336498	0.908617	1.58638	8.75074e-08	up	AT4G30700	Pentatricopeptide repeat (PPR) superfamily protein
Ghir_A02G001300	1.02496	0.118346	-2.95793	0.00512219	down	AT1G08450	calreticulin 3
Ghir_A02G001330	0.81783	0.196359	-1.96062	0.00258336	down	AT2G43410	RNA binding
Ghir_A02G001340	2.44792	6.8447	1.61162	1.83079e-12	up	AT1G06110	SKP1/ASK-interacting protein 16
Ghir_A02G001350	17.5475	5.47572	-1.54828	0.00012779	down	AT1G06070	Basic-leucine zipper (bZIP) transcription factor family protein
Ghir_A02G001380	0.458202	0.0572285	-2.91193	0.0431631	down	AT4G26020	unknown protein; Has 17652 Blast hits to 12460 proteins in 982 species: Archae - 248; Bacteria - 2077; Metazoa - 7446; Fungi - 1455; Plants - 656; Viruses - 34; Other Eukaryotes - 5736 (source: NCBI BLink).
Ghir_A02G001390	1.09532	0.047124	-4.35677	4.37092e-16	down	AT5G58003	C-terminal domain phosphatase-like 4
Ghir_A02G001400	5.3281	2.0819	-1.23333	4.13327e-06	down	AT5G58003	C-terminal domain phosphatase-like 4
Ghir_A02G001440	4.52251	17.4532	2.08955	8.13598e-10	up	AT3G48560	chlorsulfuron/imidazolinone resistant 1
Ghir_A02G001500	0.900782	3.62716	2.15172	0.000110906	up	AT2G31660	ARM repeat superfamily protein
Ghir_A02G001520	4.64471	8.42437	1.0068	0.000573543	up	AT1G05810	RAB GTPase homolog A5E
Ghir_A02G001560	0.522441	1.90365	2.03599	0.0418393	up	AT1G21310	extensin 3
Ghir_A02G001570	7.72844	18.9562	1.43928	6.2083e-07	up	AT2G43160	ENTH/VHS family protein
Ghir_A02G001640	1.0588	2.73385	1.51119	0.0351808	up	AT3G59310	Eukaryotic protein of unknown function (DUF914)
Ghir_A02G001740	3.30468	7.95818	1.41702	4.90099e-06	up	AT2G31440	INVOLVED IN: positive regulation of catalytic activity, protein processing; LOCATED IN: integral to membrane; EXPRESSED IN: 24 plant structures; EXPRESSED DURING: 15 growth stages; CONTAINS InterPro DOMAIN/s: Aph-1 (InterPro:IPR009294); Has 268 Blast hits to 262 proteins in 79 species: Archae - 0; Bacteria - 0; Metazoa - 212; Fungi - 0; Plants - 34; Viruses - 0; Other Eukaryotes - 22 (source: NCB…
Ghir_A02G001760	0.300966	0.0049135	-5.70055	0.0354475	down	AT1G05910	cell division cycle protein 48-related / CDC48-related
Ghir_A02G001780	4.21336	46.6819	3.61586	1.94626e-14	up	AT3G07880	Immunoglobulin E-set superfamily protein
Ghir_A02G001790	0.445274	4.59829	3.49325	2.52354e-31	up	AT1G14780	MAC/Perforin domain-containing protein
Ghir_A02G001820	25.2418	3.57938	-2.67343	0.00154529	down	AT3G25400	CONTAINS InterPro DOMAIN/s: NTP Pyrophosphohydrolase MazG-related, RS21-C6 (InterPro:IPR011394), EAR (InterPro:IPR009039), NTP pyrophosphohydrolase MazG, putative catalytic core (InterPro:IPR004518); Has 1123 Blast hits to 1121 proteins in 452 species: Archae - 22; Bacteria - 753; Metazoa - 81; Fungi - 3; Plants - 83; Viruses - 0; Other Eukaryotes - 181 (source: NCBI BLink).
Ghir_A02G001860	0.126703	0.71147	2.63174	0.00590336	up	AT3G23700	Nucleic acid-binding proteins superfamily
Ghir_A02G001870	1.78471	5.73487	1.83769	6.66226e-06	up	AT2G31680	RAB GTPase homolog A5D
Ghir_A02G001880	0.952303	10.9746	3.67542	8.06011e-20	up	AT3G07340	basic helix-loop-helix (bHLH) DNA-binding superfamily protein
Ghir_A02G001910	0.974113	6.05818	2.78625	0.000349152	up	AT1G05520	Sec23/Sec24 protein transport family protein
Ghir_A02G002030	0.231369	0.0057005	-4.91122	0.00175323	down	AT3G23740	unknown protein; FUNCTIONS IN: molecular_function unknown; INVOLVED IN: biological_process unknown; LOCATED IN: chloroplast; EXPRESSED IN: 9 plant structures; EXPRESSED DURING: C globular stage, F mature embryo stage, petal differentiation and expansion stage, E expanded cotyledon stage, D bilateral stage; BEST Arabidopsis thaliana protein match is: unknown protein (TAIR:AT4G14120.1); Has 155 Bla…
Ghir_A02G002070	10.3443	31.7031	1.73112	0.012941	up	AT3G23750	Leucine-rich repeat protein kinase family protein
Ghir_A02G002130	7.27461	3.21008	-1.0505	0.00183956	down	AT4G13980	winged-helix DNA-binding transcription factor family protein
Ghir_A02G002140	15.3514	3.20143	-2.10884	4.75145e-11	down	AT4G13950	ralf-like 31
Ghir_A02G002180	2.79825	0.939195	-1.42755	1.1344e-05	down	AT4G29660	embryo defective 2752
Ghir_A02G002220	7.50762	1.91862	-1.82794	6.67943e-09	down	AT4G13830	DNAJ-like 20
Ghir_A02G002330	8.74715	3.9805	-1.00362	0.00826791	down	AT4G14147	protein binding
Ghir_A02G002360	6.93196	39.8304	2.66494	2.62119e-07	up	AT1G04910	O-fucosyltransferase family protein
Ghir_A02G002380	0.784214	0.319783	-1.17537	0.00965472	down	AT1G04840	Tetratricopeptide repeat (TPR)-like superfamily protein
Ghir_A02G002410	5.56429	21.8476	2.10942	1.05162e-22	up	AT3G25040	endoplasmic reticulum retention defective 2B
Ghir_A02G002530	7.73031	1.45956	-2.27881	4.20965e-07	down	AT3G24120	Homeodomain-like superfamily protein
Ghir_A02G002560	0.026432	0.362496	3.84723	0.0239512	up	AT1G79480	Carbohydrate-binding X8 domain superfamily protein
Ghir_A02G002570	2.00462	6.62778	1.86247	2.32347e-14	up	AT3G24160	putative type 1 membrane protein
Ghir_A02G002760	1.63583	0.643402	-1.22405	0.000631425	down	AT4G13550	triglyceride lipases;triglyceride lipases
Ghir_A02G002840	3.30519	21.7848	2.8941	2.37689e-15	up	AT2G29420	glutathione S-transferase tau 7
Ghir_A02G002900	10.515	3.57375	-1.39153	0.0492944	down	AT2G38540	lipid transfer protein 1
Ghir_A02G002910	7.07921	2.15752	-1.57284	3.67596e-06	down	AT3G24010	RING/FYVE/PHD zinc finger superfamily protein
Ghir_A02G003060	1.11476	0.314254	-1.71863	0.0169188	down	AT5G19030	RNA-binding (RRM/RBD/RNP motifs) family protein
Ghir_A02G003080	11.2677	2.6972	-1.9253	4.19112e-05	down	AT5G19150	pfkB-like carbohydrate kinase family protein
Ghir_A02G003110	3.0182	23.1924	3.08063	5.43449e-29	up	AT3G06035	Glycoprotein membrane precursor GPI-anchored
Ghir_A02G003160	3.08111	0.587061	-2.28829	9.06006e-05	down	AT5G19070	SNARE associated Golgi protein family
Ghir_A02G003180	0.2373	2.09462	3.27336	3.48999e-11	up	AT3G22400	PLAT/LH2 domain-containing lipoxygenase family protein
Ghir_A02G003190	2.57004	17.9965	2.95462	7.40327e-05	up	AT1G03130	photosystem I subunit D-2
Ghir_A02G003200	0.295554	1.23589	2.18978	0.0447204	up	AT1G31710	Copper amine oxidase family protein
Ghir_A02G003240	3.32404	11.6553	1.96063	3.52887e-08	up	AT2G18570	UDP-Glycosyltransferase superfamily protein
Ghir_A02G003360	1.3881	0.0043955	-7.6632	6.82409e-10	down
Ghir_A02G003380	13.8338	64.7028	2.39499	1.49384e-05	up	AT3G22630	20S proteasome beta subunit D1
Ghir_A02G003390	0.163634	3.03405	4.34216	3.14645e-05	up	AT4G10250	HSP20-like chaperones superfamily protein
Ghir_A02G003410	2.4157	0.50888	-2.1347	0.00446652	down	AT1G59960	NAD(P)-linked oxidoreductase superfamily protein
Ghir_A02G003420	0.0668213	2.1882	5.09099	0.0131795	up	AT3G22620	Bifunctional inhibitor/lipid-transfer protein/seed storage 2S albumin superfamily protein
Ghir_A02G003460	4.81248	0.109557	-5.24595	2.74653e-05	down	AT2G32030	Acyl-CoA N-acyltransferases (NAT) superfamily protein
Ghir_A02G003540	35.4235	10.0987	-1.6894	0.000501869	down	AT3G22810	Plant protein of unknown function (DUF828) with plant pleckstrin homology-like region
Ghir_A02G003560	9.06135	19.7385	1.27908	3.04309e-06	up	AT4G14710	RmlC-like cupins superfamily protein
Ghir_A02G003590	0.080037	0	-5.77313	0.0262809	down	AT3G22880	DNA repair (Rad51) family protein
Ghir_A02G003610	0.126711	0.575653	2.2924	0.00107174	up	AT4G14650	unknown protein; FUNCTIONS IN: molecular_function unknown; INVOLVED IN: N-terminal protein myristoylation; EXPRESSED IN: 6 plant structures; EXPRESSED DURING: petal differentiation and expansion stage; Has 2407 Blast hits to 1833 proteins in 310 species: Archae - 19; Bacteria - 223; Metazoa - 708; Fungi - 285; Plants - 140; Viruses - 42; Other Eukaryotes - 990 (source: NCBI BLink).
Ghir_A02G003620	0.363047	0.0289275	-3.31376	0.00760276	down	AT4G14640	calmodulin 8
Ghir_A02G003700	0.66836	0	-8.72972	4.84756e-05	down	AT5G43650	basic helix-loop-helix (bHLH) DNA-binding superfamily protein
Ghir_A02G003750	1.65008	0.305864	-2.34732	0.00647086	down	AT4G29090	Ribonuclease H-like superfamily protein
Ghir_A02G003770	5.96349	0.982624	-2.46209	3.0035e-11	down	AT4G14490	SMAD/FHA domain-containing protein
Ghir_A02G003890	0.985034	4.20747	2.23038	4.80823e-07	up	AT4G14440	3-hydroxyacyl-CoA dehydratase 1
Ghir_A02G003900	0.0750237	11.3016	7.24737	4.00058e-07	up	AT4G14420	HR-like lesion-inducing protein-related
Ghir_A02G004000	1.67616	7.13241	2.27112	0.00385956	up	AT3G22142	Bifunctional inhibitor/lipid-transfer protein/seed storage 2S albumin superfamily protein
Ghir_A02G004010	1.86867	0.677914	-1.32307	0.00517744	down	AT5G43380	type one serine/threonine protein phosphatase 6
Ghir_A02G004020	0.424071	0.014202	-4.83967	0.00118692	down	AT1G04400	cryptochrome 2
Ghir_A02G004030	4.79618	0.671473	-2.71246	2.85455e-13	down	AT4G14385	FUNCTIONS IN: molecular_function unknown; INVOLVED IN: biological_process unknown; LOCATED IN: vacuole; EXPRESSED IN: 24 plant structures; EXPRESSED DURING: 15 growth stages; CONTAINS InterPro DOMAIN/s: Histone H4 acetyltransferase, NuA4 complex, Eaf6 (InterPro:IPR015418); Has 30201 Blast hits to 17322 proteins in 780 species: Archae - 12; Bacteria - 1396; Metazoa - 17338; Fungi - 3422; Plants - …
Ghir_A02G004040	29.5369	219.028	3.03167	0.00684784	up	AT1G04410	Lactate/malate dehydrogenase family protein
Ghir_A02G004060	0.561593	0.014272	-4.89037	0.00417345	down	AT1G07090	Protein of unknown function (DUF640)
Ghir_A02G004080	0.980191	0.0027895	-7.83594	0.0199868	down	AT4G14350	AGC (cAMP-dependent, cGMP-dependent and protein kinase C) kinase family protein
Ghir_A02G004130	10.1426	3.32057	-1.48126	0.000355635	down	AT4G14330	P-loop containing nucleoside triphosphate hydrolases superfamily protein
Ghir_A02G004170	2.00596	0.051948	-5.0605	2.40487e-06	down	AT3G23440	embryo sac development arrest 6
Ghir_A02G004200	22.7668	7.22007	-1.51226	0.00312697	down	AT2G33450	Ribosomal L28 family
Ghir_A02G004220	0.171654	0.0136215	-3.42932	0.0413511	down	AT3G23490	cyanase
Ghir_A02G004240	0.141049	0.612304	2.28652	0.0162687	up	AT5G46050	peptide transporter 3
Ghir_A02G004270	0.127147	0.01221	-3.14147	0.000155918	down	AT3G23510	Cyclopropane-fatty-acyl-phospholipid synthase
Ghir_A02G004300	1.56944	0.45674	-1.63027	1.62036e-06	down	AT2G33390	unknown protein; Has 34 Blast hits to 34 proteins in 10 species: Archae - 0; Bacteria - 0; Metazoa - 0; Fungi - 0; Plants - 34; Viruses - 0; Other Eukaryotes - 0 (source: NCBI BLink).
Ghir_A02G004310	12.9696	26.823	1.19994	0.000227445	up	AT5G35620	Eukaryotic initiation factor 4E protein
Ghir_A02G004550	34.6015	7.47152	-2.04552	0.00269645	down	AT4G13520	small acidic protein 1
Ghir_A02G004590	2.49017	1.03205	-1.13507	0.00124237	down	AT3G06270	Protein phosphatase 2C family protein
Ghir_A02G004650	0.962219	0.154847	-2.44187	0.00415578	down	AT5G18860	inosine-uridine preferring nucleoside hydrolase family protein
Ghir_A02G004700	4.10578	1.13109	-1.72818	1.34912e-06	down	AT3G21480	BRCT domain-containing DNA repair protein
Ghir_A02G004790	0.192397	1.41114	3.03488	0.0352947	up	AT5G18650	CHY-type/CTCHY-type/RING-type Zinc finger protein
Ghir_A02G004890	0	1.93227	24.7198	1.35153e-05	up	AT5G07900	Mitochondrial transcription termination factor family protein
Ghir_A02G004900	0.00290733	1.62241	8.37281	6.19338e-05	up	AT5G07900	Mitochondrial transcription termination factor family protein
Ghir_A02G004910	0.193014	0.0379225	-2.16448	0.0274552	down	AT5G18540	unknown protein; Has 1784 Blast hits to 634 proteins in 116 species: Archae - 0; Bacteria - 0; Metazoa - 1013; Fungi - 200; Plants - 288; Viruses - 0; Other Eukaryotes - 283 (source: NCBI BLink).
Ghir_A02G004990	3.53924	184.841	5.84444	1.09417e-59	up	AT4G15800	ralf-like 33
Ghir_A02G005010	0.493049	0.137577	-1.70219	0.00954843	down	AT4G02500	UDP-xylosyltransferase 2
Ghir_A02G005080	13.5991	60.1546	2.29129	1.86008e-23	up	AT4G15930	Dynein light chain type 1 family protein
Ghir_A02G005120	5.07683	1.0415	-2.11521	0.0114837	down	AT3G06840	unknown protein; BEST Arabidopsis thaliana protein match is: unknown protein (TAIR:AT5G49170.1); Has 33 Blast hits to 33 proteins in 9 species: Archae - 0; Bacteria - 0; Metazoa - 0; Fungi - 0; Plants - 33; Viruses - 0; Other Eukaryotes - 0 (source: NCBI BLink).
Ghir_A02G005180	0.0350607	0.404566	3.63354	4.98056e-06	up	AT3G16785	phospholipase D P1
Ghir_A02G005210	4.09716	12.4329	1.75691	0.00050337	up	AT1G66070	Translation initiation factor eIF3 subunit
Ghir_A02G005240	0	0.833515	10.0877	0.000112322	up	AT1G24020	MLP-like protein 423
Ghir_A02G005350	21.7055	2.88633	-2.76751	7.38835e-06	down	AT3G06740	GATA transcription factor 15
Ghir_A02G005380	1.36423	7.74055	2.65013	7.22539e-06	up	AT3G16910	acyl-activating enzyme 7
Ghir_A02G005450	0.0128277	0	-4.14722	0.0480736	down	AT3G03450	RGA-like 2
Ghir_A02G005500	0.282896	5.53594	4.40205	0.0298873	up	AT3G66654	Cyclophilin-like peptidyl-prolyl cis-trans isomerase family protein
Ghir_A02G005520	0.068342	0	-6.09556	0.000888412	down	AT1G22710	sucrose-proton symporter 2
Ghir_A02G005550	2.20748	0	-10.3783	4.2359e-09	down	AT3G15740	RING/U-box superfamily protein
Ghir_A02G005610	0.0810313	0	-5.77819	0.00340557	down
Ghir_A02G005660	0.0744293	0.294245	2.07766	0.0330741	up	AT3G12410	Polynucleotidyl transferase, ribonuclease H-like superfamily protein
Ghir_A02G005770	16.5037	71.9555	2.28483	0.00985713	up	AT1G48030	mitochondrial lipoamide dehydrogenase 1
Ghir_A02G005840	3.76994	1.39866	-1.31116	0.0277195	down	AT2G47160	HCO3- transporter family
Ghir_A02G005950	5.64608	0.516675	-3.36471	0.0078812	down
Ghir_A02G005960	15.3585	2.82337	-2.32097	2.66045e-06	down
Ghir_A02G005970	76.4302	14.1245	-2.29371	5.56983e-06	down	AT3G17390	S-adenosylmethionine synthetase family protein
Ghir_A02G006010	3.12409	6.57858	1.22103	1.30677e-06	up	AT5G23710	DNA binding;DNA-directed RNA polymerases
Ghir_A02G006140	0.0495703	1.06596	4.49942	0.00418467	up	AT1G48280	hydroxyproline-rich glycoprotein family protein
Ghir_A02G006150	0.955305	0	-28.0493	5.0784e-05	down	AT3G21760	UDP-Glycosyltransferase superfamily protein
Ghir_A02G006180	21.7957	7.7432	-1.36518	0.00100111	down	AT1G48320	Thioesterase superfamily protein
Ghir_A02G006210	0.650848	0.234451	-1.35574	0.00805002	down
Ghir_A02G006230	0.012161	0.265439	4.50731	2.51492e-05	up	AT1G35670	calcium-dependent protein kinase 2
Ghir_A02G006240	0.105666	0	-5.80025	0.0235965	down	AT4G09580	SNARE associated Golgi protein family
Ghir_A02G006250	34.285	2.05167	-3.94851	4.81111e-05	down	AT1G75750	GAST1 protein homolog 1
Ghir_A02G006300	16.9439	5.82588	-1.40219	1.85726e-11	down	AT1G34370	C2H2 and C2HC zinc fingers superfamily protein
Ghir_A02G006370	10.51	4.25012	-1.17463	0.0217689	down	AT1G07950	Surfeit locus protein 5 subunit 22 of Mediator complex
Ghir_A02G006410	1.06013	5.1069	2.41316	8.64635e-07	up	AT1G34270	Exostosin family protein
Ghir_A02G006440	2.46165	0.503429	-2.13128	0.0266405	down	AT1G34190	NAC domain containing protein 17
Ghir_A02G006490	0.633194	0.0353195	-4.03116	0.00720865	down	AT1G71760	unknown protein; FUNCTIONS IN: molecular_function unknown; INVOLVED IN: biological_process unknown; LOCATED IN: cellular_component unknown; EXPRESSED IN: shoot apex, embryo, leaf whorl, flower, seed; EXPRESSED DURING: F mature embryo stage, petal differentiation and expansion stage, E expanded cotyledon stage, D bilateral stage; Has 84 Blast hits to 84 proteins in 35 species: Archae - 0; Bacteria…
Ghir_A02G006510	0.248701	0	-8.72014	0.00278362	down	AT1G71710	DNAse I-like superfamily protein
Ghir_A02G006590	3.62015	0.875151	-1.8808	0.0391223	down	AT4G09890	Protein of unknown function (DUF3511)
Ghir_A02G006610	1.41345	0	-10.8062	5.34568e-11	down	AT5G61890	Integrase-type DNA-binding superfamily protein
Ghir_A02G006620	0.982483	0	-10.5063	0.0014177	down	AT1G43190	polypyrimidine tract-binding protein 3
Ghir_A02G006660	4.94953	1.38972	-1.70771	8.10792e-11	down	AT5G44080	Basic-leucine zipper (bZIP) transcription factor family protein
Ghir_A02G006710	4.93064	13.6521	1.58108	0.0161437	up	AT1G76850	exocyst complex component sec5
Ghir_A02G006800	14.172	1.34882	-3.26028	4.19015e-09	down	AT3G18710	plant U-box 29
Ghir_A02G006990	3.74612	9.22988	1.42857	0.000153572	up	AT1G21480	Exostosin family protein
Ghir_A02G007070	0.0666633	0	-6.47632	0.00954448	down	AT1G53570	mitogen-activated protein kinase kinase kinase 3
Ghir_A02G007100	7.59787	0.892692	-3.00331	0.000881645	down	AT1G21450	SCARECROW-like 1
Ghir_A02G007150	3.76441	0.391812	-3.13774	0.0163428	down	AT2G02850	plantacyanin
Ghir_A02G007190	2.6273	0.0637585	-5.13825	0.0364092	down	AT1G21410	F-box/RNI-like superfamily protein
Ghir_A02G007200	8.03134	2.63366	-1.47894	0.005638	down	AT1G76990	ACT domain repeat 3
Ghir_A02G007230	2.09411	0.332352	-2.50081	0.000709108	down	AT1G21400	Thiamin diphosphate-binding fold (THDP-binding) superfamily protein
Ghir_A02G007270	0.797106	0.0224005	-4.98991	1.59932e-08	down	AT1G44000	unknown protein; BEST Arabidopsis thaliana protein match is: unknown protein (TAIR:AT4G11911.1); Has 216 Blast hits to 212 proteins in 76 species: Archae - 0; Bacteria - 96; Metazoa - 0; Fungi - 0; Plants - 118; Viruses - 0; Other Eukaryotes - 2 (source: NCBI BLink).
Ghir_A02G007480	1.7832	0.215473	-2.93233	0.0226351	down	AT2G47760	asparagine-linked glycosylation 3
Ghir_A02G007540	1.12251	0.0553685	-4.24574	1.6923e-05	down	AT1G21650	Preprotein translocase SecA family protein
Ghir_A02G007560	17.673	4.98125	-1.69547	1.04074e-12	down	AT1G21700	SWITCH/sucrose nonfermenting 3C
Ghir_A02G007590	35.141	78.9065	1.32095	1.33944e-06	up	AT1G21720	proteasome beta subunit C1
Ghir_A02G007630	3.63632	0.0135655	-7.68688	1.51101e-08	down	AT1G44130	Eukaryotic aspartyl protease family protein
Ghir_A02G007640	0.790362	0.125036	-2.5193	0.0274224	down	AT1G44170	aldehyde dehydrogenase 3H1
Ghir_A02G007660	2.14193	5.20657	1.42828	1.76143e-06	up	AT1G21780	BTB/POZ domain-containing protein
Ghir_A02G007670	0.910222	0.22738	-1.83889	0.00606708	down	AT1G44446	Pheophorbide a oxygenase family protein with Rieske [2Fe-2S] domain
Ghir_A02G007710	7.89427	23.3613	1.70537	1.77855e-07	up	AT1G77610	EamA-like transporter family protein
Ghir_A02G007720	0.0944137	8.65031	6.54996	2.89272e-11	up	AT1G44760	Adenine nucleotide alpha hydrolases-like superfamily protein
Ghir_A02G008010	0.204764	0.0104095	-3.76355	0.0030763	down	AT1G22060	LOCATED IN: vacuole; EXPRESSED IN: 23 plant structures; EXPRESSED DURING: 13 growth stages; BEST Arabidopsis thaliana protein match is: FBD, F-box and Leucine Rich Repeat domains containing protein (TAIR:AT1G22000.1); Has 84739 Blast hits to 38714 proteins in 2257 species: Archae - 1436; Bacteria - 11314; Metazoa - 40747; Fungi - 7706; Plants - 4675; Viruses - 308; Other Eukaryotes - 18553 (sourc…
Ghir_A02G008070	3.44395	0.476471	-2.73509	9.6474e-07	down	AT1G78080	related to AP2 4
Ghir_A02G008130	74.0093	13.1061	-2.37164	0.000274997	down	AT4G08950	Phosphate-responsive 1 family protein
Ghir_A02G008190	0.127892	0.0098075	-3.59442	0.00256019	down	AT1G72210	basic helix-loop-helix (bHLH) DNA-binding superfamily protein
Ghir_A02G008200	0.982431	0.210692	-2.07863	0.00186415	down	AT1G72200	RING/U-box superfamily protein
Ghir_A02G008260	0.788034	2.11239	1.54049	0.0428057	up	ATCG01280	Chloroplast Ycf2;ATPase, AAA type, core
Ghir_A02G008280	5.63245	0.861972	-2.5528	1.92537e-10	down	AT5G16650	Chaperone DnaJ-domain superfamily protein
Ghir_A02G008300	1.39253	0.624899	-1.03532	0.0452678	down	AT4G24580	Rho GTPase activation protein (RhoGAP) with PH domain
Ghir_A02G008380	0.0614257	0	-6.53251	0.00168792	down	AT5G49700	Predicted AT-hook DNA-binding family protein
Ghir_A02G008500	26.2627	413.329	4.11529	2.36311e-44	up	AT1G50010	tubulin alpha-2 chain
Ghir_A02G008520	0.700359	0.110273	-2.47066	0.00033977	down	AT1G10040	alpha/beta-Hydrolases superfamily protein
Ghir_A02G008550	0.243527	0	-7.67652	0.000252838	down	AT4G37790	Homeobox-leucine zipper protein family
Ghir_A02G008610	1.82492	0.233592	-2.85569	0.000395438	down	AT1G59540	P-loop containing nucleoside triphosphate hydrolases superfamily protein
Ghir_A02G008640	1.48726	0.035053	-5.14777	5.35655e-08	down	AT5G36690	AT5G36690 and AT5G36780 represent identical copies. The duplication within clone F27C7 is believed an artifact with only one true copy existing.
Ghir_A02G008710	1.41068	0.251292	-2.37624	0.00334409	down	AT1G27760	interferon-related developmental regulator family protein / IFRD protein family
Ghir_A02G008720	89.5147	0.665422	-6.93835	1.54548e-13	down	AT1G27730	salt tolerance zinc finger
Ghir_A02G008730	1.10541	2.01831	1.00227	0.0181972	up	AT1G49890	Family of unknown function (DUF566)
Ghir_A02G008750	3.72837	16.8489	2.26229	0.0279511	up	AT5G43150	unknown protein; FUNCTIONS IN: molecular_function unknown; INVOLVED IN: biological_process unknown; LOCATED IN: mitochondrion; EXPRESSED IN: 22 plant structures; EXPRESSED DURING: 13 growth stages; Has 1807 Blast hits to 1807 proteins in 277 species: Archae - 0; Bacteria - 0; Metazoa - 736; Fungi - 347; Plants - 385; Viruses - 0; Other Eukaryotes - 339 (source: NCBI BLink).
Ghir_A02G008810	0.215893	0.0102925	-4.3372	0.0218203	down	AT1G77950	AGAMOUS-like 67
Ghir_A02G008840	5.33257	1.38817	-1.78591	0.00141046	down	AT4G34160	CYCLIN D3;1
Ghir_A02G008850	5.85299	2.03799	-1.38292	1.11989e-06	down	AT3G46630	Protein of unknown function (DUF3223)
Ghir_A02G008930	3.06914	10.2551	1.8787	1.02362e-08	up	AT4G34110	poly(A) binding protein 2
Ghir_A02G008950	5.45106	10.6998	1.12684	0.00651114	up	AT4G01400	FUNCTIONS IN: molecular_function unknown; INVOLVED IN: biological_process unknown; LOCATED IN: cellular_component unknown; EXPRESSED IN: 23 plant structures; EXPRESSED DURING: 15 growth stages; CONTAINS InterPro DOMAIN/s: COG4 transport (InterPro:IPR013167); Has 465 Blast hits to 425 proteins in 199 species: Archae - 0; Bacteria - 3; Metazoa - 153; Fungi - 166; Plants - 45; Viruses - 0; Other Euk…
Ghir_A02G008970	5.61847	1.11845	-2.23449	0.0013699	down	AT3G21140	Pyridoxamine 5'-phosphate oxidase family protein
Ghir_A02G009000	0.797628	3.82891	2.39772	0.00149523	up	AT2G02370	SNARE associated Golgi protein family
Ghir_A02G009010	0.903735	21.8651	4.72657	3.06974e-05	up	AT2G34770	fatty acid hydroxylase 1
Ghir_A02G009230	1.28253	0.0953195	-3.66715	0.0314397	down
Ghir_A02G009240	1.54102	3.94418	1.48719	4.51415e-07	up	AT3G54200	Late embryogenesis abundant (LEA) hydroxyproline-rich glycoprotein family
Ghir_A02G009250	32.3332	95.5513	1.70743	5.84914e-07	up	AT1G09780	Phosphoglycerate mutase, 2,3-bisphosphoglycerate-independent
Ghir_A02G009350	0.200265	0.025686	-2.88469	0.0316057	down	AT5G24070	Peroxidase superfamily protein
Ghir_A02G009380	1.46001	0	-24.0454	4.14529e-12	down	AT3G59470	Far-red impaired responsive (FAR1) family protein
Ghir_A02G009450	1.57787	0.568348	-1.33783	1.09512e-05	down	AT1G75670	DNA-directed RNA polymerases
Ghir_A02G009470	17.4736	4.52531	-1.81693	0.00662007	down	AT1G75800	Pathogenesis-related thaumatin superfamily protein
Ghir_A02G009490	0.410386	0.104385	-1.84977	0.000306309	down	AT3G17611	RHOMBOid-like protein 14
Ghir_A02G009510	8.84363	16.2647	1.01957	0.00032502	up	AT4G35230	BR-signaling kinase 1
Ghir_A02G009540	0.29178	10.7113	5.3156	4.90026e-05	up	AT1G20080	Calcium-dependent lipid-binding (CaLB domain) family protein
Ghir_A02G009580	5.72697	1.49718	-1.78944	4.68561e-06	down	AT4G35020	RAC-like 3
Ghir_A02G009600	0.622837	8.04555	3.82988	3.59979e-47	up	AT1G20270	2-oxoglutarate (2OG) and Fe(II)-dependent oxygenase superfamily protein
Ghir_A02G009660	5.99262	0.0733675	-6.21276	2.09136e-06	down	AT4G25810	xyloglucan endotransglycosylase 6
Ghir_A02G009740	49.04	7.27156	-2.61894	1.62697e-08	down	AT1G20580	Small nuclear ribonucleoprotein family protein
Ghir_A02G009890	4.89153	8.97845	1.00618	0.00221263	up	AT1G22620	Phosphoinositide phosphatase family protein
Ghir_A02G009920	0.331793	0.0109215	-4.40579	3.35424e-05	down	AT2G29940	pleiotropic drug resistance 3
Ghir_A02G009960	1.82722	0.507684	-1.67062	0.000594806	down	AT4G10890	unknown protein; CONTAINS InterPro DOMAIN/s: Protein of unknown function DUF2439 (InterPro:IPR018838); BEST Arabidopsis thaliana protein match is: unknown protein (TAIR:AT1G43722.1); Has 30201 Blast hits to 17322 proteins in 780 species: Archae - 12; Bacteria - 1396; Metazoa - 17338; Fungi - 3422; Plants - 5037; Viruses - 0; Other Eukaryotes - 2996 (source: NCBI BLink).
Ghir_A02G010030	16.8544	42.4598	1.48036	1.95482e-17	up	AT1G30630	Coatomer epsilon subunit
Ghir_A02G010070	0.381742	1.07826	1.66309	0.0064181	up	AT1G30800	Fasciclin-like arabinogalactan family protein
Ghir_A02G010150	0.123233	0.493358	2.17851	0.0101664	up	AT1G63310	unknown protein; BEST Arabidopsis thaliana protein match is: unknown protein (TAIR:AT2G20362.1); Has 78 Blast hits to 77 proteins in 11 species: Archae - 0; Bacteria - 0; Metazoa - 0; Fungi - 0; Plants - 78; Viruses - 0; Other Eukaryotes - 0 (source: NCBI BLink).
Ghir_A02G010180	0.959724	0	-6.80769	0.00372551	down	AT1G33055	unknown protein; FUNCTIONS IN: molecular_function unknown; INVOLVED IN: anaerobic respiration; LOCATED IN: endomembrane system; EXPRESSED IN: 13 plant structures; EXPRESSED DURING: 6 growth stages; Has 20 Blast hits to 20 proteins in 8 species: Archae - 0; Bacteria - 0; Metazoa - 0; Fungi - 0; Plants - 20; Viruses - 0; Other Eukaryotes - 0 (source: NCBI BLink).
Ghir_A02G010200	1.07536	0.297045	-1.73915	0.0133013	down	AT2G46870	AP2/B3-like transcriptional factor family protein
Ghir_A02G010240	0.157892	0.824882	2.48514	0.000282364	up	AT4G10550	Subtilase family protein
Ghir_A02G010420	4.33748	1.28324	-1.64548	2.69243e-06	down	AT1G64610	Transducin/WD40 repeat-like superfamily protein
Ghir_A02G010430	2.87427	1.15276	-1.17534	0.01874	down	AT4G24060	Dof-type zinc finger DNA-binding family protein
Ghir_A02G010480	0.211611	7.00957	5.12109	7.51811e-06	up	AT5G41990	with no lysine (K) kinase 8
Ghir_A02G010490	1.11562	10.0648	3.28559	0.0142241	up
Ghir_A02G010500	1.45125	11.9149	3.182	2.87074e-09	up	AT1G64640	early nodulin-like protein 8
Ghir_A02G010540	3.47769	8.04758	1.35303	2.12342e-06	up	AT5G41950	Tetratricopeptide repeat (TPR)-like superfamily protein
Ghir_A02G010600	11.2366	1.43052	-2.85028	0.0101198	down	AT1G02800	cellulase 2
Ghir_A02G010630	0.05965	1.7186	4.90058	2.01782e-07	up	AT5G42090	Lung seven transmembrane receptor family protein
Ghir_A02G010850	0.266385	0.007734	-4.62282	0.0325918	down	AT5G62050	homolog of yeast oxidase assembly 1 (OXA1)
Ghir_A02G010890	0.898971	84.9548	6.69973	2.74715e-17	up	AT1G64390	glycosyl hydrolase 9C2
Ghir_A02G010930	0.189453	4.15327	4.5459	1.66992e-23	up	AT1G64340	unknown protein; BEST Arabidopsis thaliana protein match is: unknown protein (TAIR:AT5G41810.1); Has 30201 Blast hits to 17322 proteins in 780 species: Archae - 12; Bacteria - 1396; Metazoa - 17338; Fungi - 3422; Plants - 5037; Viruses - 0; Other Eukaryotes - 2996 (source: NCBI BLink).
Ghir_A02G010950	2.24663	50.1273	4.62132	1.1325e-83	up	AT4G11090	TRICHOME BIREFRINGENCE-LIKE 23
Ghir_A02G010970	0.0357367	1.61724	5.68414	0.00938737	up	AT5G41790	COP1-interactive protein 1
Ghir_A02G010990	2.44376	1.10413	-1.01407	0.000933603	down
Ghir_A02G011000	1.633	0.309055	-2.25219	2.99918e-06	down	AT4G23750	cytokinin response factor 2
Ghir_A02G011180	0.970672	25.3623	4.80457	1.16258e-05	up	AT4G23640	Potassium transporter family protein
Ghir_A02G011240	3.93223	0.63322	-2.44386	0.010662	down	AT1G64080	unknown protein; FUNCTIONS IN: molecular_function unknown; INVOLVED IN: biological_process unknown; LOCATED IN: plasma membrane; BEST Arabidopsis thaliana protein match is: unknown protein (TAIR:AT5G52870.1); Has 1546 Blast hits to 738 proteins in 176 species: Archae - 0; Bacteria - 143; Metazoa - 278; Fungi - 131; Plants - 95; Viruses - 4; Other Eukaryotes - 895 (source: NCBI BLink).
Ghir_A02G011260	0.361334	40.8286	6.97298	5.17151e-18	up	AT1G64065	Late embryogenesis abundant (LEA) hydroxyproline-rich glycoprotein family
Ghir_A02G011320	0.19684	0	-26.4073	0.00015136	down	AT1G63980	D111/G-patch domain-containing protein
Ghir_A02G011360	1.30158	20.9509	4.11985	0.0164224	up	AT1G50920	Nucleolar GTP-binding protein
Ghir_A02G011470	3.7462	8.27119	1.28517	0.000237637	up	AT2G41900	CCCH-type zinc finger protein with ARM repeat domain
Ghir_A02G011580	0.486285	0	-7.99009	0.000110906	down	AT1G74670	Gibberellin-regulated family protein
Ghir_A02G011630	0.000327	0.0881935	6.19594	0.0247294	up	AT2G41190	Transmembrane amino acid transporter family protein
Ghir_A02G011650	14.7043	43.8761	1.72167	6.50448e-26	up	AT1G65270	unknown protein; FUNCTIONS IN: molecular_function unknown; INVOLVED IN: biological_process unknown; LOCATED IN: endoplasmic reticulum, plasma membrane; EXPRESSED IN: 24 plant structures; EXPRESSED DURING: 13 growth stages; Has 149 Blast hits to 149 proteins in 49 species: Archae - 0; Bacteria - 0; Metazoa - 98; Fungi - 0; Plants - 47; Viruses - 0; Other Eukaryotes - 4 (source: NCBI BLink).
Ghir_A02G011660	1.39797	0.438012	-1.51088	0.0289578	down	AT1G15760	Sterile alpha motif (SAM) domain-containing protein
Ghir_A02G011690	6.35927	27.2524	2.23558	2.29773e-10	up	AT1G43580	Sphingomyelin synthetase family protein
Ghir_A02G011710	0.75416	0.062436	-3.39633	0.00158312	down	AT1G43670	Inositol monophosphatase family protein
Ghir_A02G011970	7.44371	3.2302	-1.08409	4.88299e-05	down	AT2G02650	Ribonuclease H-like superfamily protein
Ghir_A02G012100	0.159837	1.06792	2.86203	2.32779e-06	up	AT1G21390	embryo defective 2170
Ghir_A02G012130	1.53151	0.0224915	-5.68567	0.00318173	down	AT1G10020	Protein of unknown function (DUF1005)
Ghir_A02G012240	0.0568167	0.307111	2.46448	0.00142508	up	AT1G21370	unknown protein; CONTAINS InterPro DOMAIN/s: Protein of unknown function DUF218 (InterPro:IPR003848); Has 35333 Blast hits to 34131 proteins in 2444 species: Archae - 798; Bacteria - 22429; Metazoa - 974; Fungi - 991; Plants - 531; Viruses - 0; Other Eukaryotes - 9610 (source: NCBI BLink).
Ghir_A02G012250	0.0229223	0	-5.25157	0.0399222	down	AT1G78780	pathogenesis-related family protein
Ghir_A02G012360	1.15016	2.17991	1.05671	0.036105	up	AT5G05170	Cellulose synthase family protein
Ghir_A02G012410	0.00121033	28.1404	14.2056	4.97809e-08	up	AT2G41740	villin 2
Ghir_A02G012430	1.04424	0.182738	-2.32253	0.00098206	down	AT2G41660	Protein of unknown function, DUF617
Ghir_A02G012590	0.393831	0.0288815	-3.7051	0.029045	down	AT3G03305	Calcineurin-like metallo-phosphoesterase superfamily protein
Ghir_A02G012610	0.892888	1.7892	1.14152	0.0142043	up	AT2G43945	unknown protein; LOCATED IN: chloroplast; BEST Arabidopsis thaliana protein match is: unknown protein (TAIR:AT3G59870.1); Has 292 Blast hits to 292 proteins in 84 species: Archae - 0; Bacteria - 122; Metazoa - 0; Fungi - 0; Plants - 46; Viruses - 0; Other Eukaryotes - 124 (source: NCBI BLink).
Ghir_A02G012620	1.38151	0.152502	-2.98191	0.0135863	down	AT1G08450	calreticulin 3
Ghir_A02G012630	7.93461	28.0177	1.97683	8.00348e-05	up	AT5G36890	beta glucosidase 42
Ghir_A02G012650	1.80238	6.761	2.05027	2.09656e-09	up	AT3G56930	DHHC-type zinc finger family protein
Ghir_A02G012660	1.43722	3.78603	1.53416	0.00264766	up	AT3G56750	unknown protein; BEST Arabidopsis thaliana protein match is: unknown protein (TAIR:AT2G41150.2); Has 128 Blast hits to 128 proteins in 16 species: Archae - 0; Bacteria - 0; Metazoa - 0; Fungi - 0; Plants - 117; Viruses - 0; Other Eukaryotes - 11 (source: NCBI BLink).
Ghir_A02G012780	5.94679	1.87058	-1.5336	2.51868e-12	down	AT4G27620	unknown protein; FUNCTIONS IN: molecular_function unknown; INVOLVED IN: biological_process unknown; LOCATED IN: mitochondrion; EXPRESSED IN: 18 plant structures; EXPRESSED DURING: 11 growth stages; BEST Arabidopsis thaliana protein match is: unknown protein (TAIR:AT4G27610.3); Has 35333 Blast hits to 34131 proteins in 2444 species: Archae - 798; Bacteria - 22429; Metazoa - 974; Fungi - 991; Plant…
Ghir_A02G012790	5.84864	1.40023	-1.92926	0.0105024	down	AT1G64940	cytochrome P450, family 87, subfamily A, polypeptide 6
Ghir_A02G012890	0.009595	0.205537	4.5058	0.0111356	up	AT2G19480	nucleosome assembly protein 1;2
Ghir_A02G012950	1.99913	29.1471	3.97724	6.92612e-08	up	AT1G55190	PRA1 (Prenylated rab acceptor) family protein
Ghir_A02G013020	0.347347	0.010147	-5.00888	1.01485e-05	down	AT3G21330	basic helix-loop-helix (bHLH) DNA-binding superfamily protein
Ghir_A02G013050	0.0505107	33.5774	9.4515	6.75378e-18	up	AT2G19770	profilin 5
Ghir_A02G013080	1.75219	0.101336	-4.0126	8.28333e-05	down	AT3G16490	IQ-domain 26
Ghir_A02G013110	3.69412	0.954959	-1.83557	1.38522e-06	down	AT1G79730	hydroxyproline-rich glycoprotein family protein
Ghir_A02G013260	11.2644	2.20216	-2.20935	6.93559e-13	down	AT3G16310	mitotic phosphoprotein N' end (MPPN) family protein
Ghir_A02G013270	9.94356	0.465196	-4.34734	0.0189475	down	AT3G16300	Uncharacterised protein family (UPF0497)
Ghir_A02G013280	2.83598	0.033889	-6.29121	0.0105663	down	AT3G16290	AAA-type ATPase family protein
Ghir_A02G013340	0.162446	0.013321	-3.38005	0.0264957	down	AT3G16230	Predicted eukaryotic LigT
Ghir_A02G013350	3.39072	0.004237	-9.23577	1.07441e-13	down	AT4G29080	phytochrome-associated protein 2
Ghir_A02G013370	2.08053	0	-25.3948	4.24818e-09	down	AT1G52190	Major facilitator superfamily protein
Ghir_A02G013410	0.139719	1.48055	3.52408	0.000244661	up	AT1G52280	RAB GTPase homolog G3D
Ghir_A02G013430	3.55836	1.012	-1.69892	0.00392324	down	AT1G52240	RHO guanyl-nucleotide exchange factor 11
Ghir_A02G013510	4.74575	11.1637	1.37051	9.38039e-13	up	AT1G52320	unknown protein; FUNCTIONS IN: molecular_function unknown; INVOLVED IN: N-terminal protein myristoylation; LOCATED IN: plasma membrane; EXPRESSED IN: 23 plant structures; EXPRESSED DURING: 14 growth stages; CONTAINS InterPro DOMAIN/s: Protein of unknown function DUF632 (InterPro:IPR006867); BEST Arabidopsis thaliana protein match is: Protein of unknown function (DUF630 and DUF632) (TAIR:AT5G25590…
Ghir_A02G013560	0.510706	12.4596	4.71983	4.1082e-18	up	AT3G15990	sulfate transporter 3;4
Ghir_A02G013570	1.41062	0.177463	-2.84957	0.0223913	down	AT2G14910	unknown protein; LOCATED IN: chloroplast; EXPRESSED IN: 24 plant structures; EXPRESSED DURING: 15 growth stages; BEST Arabidopsis thaliana protein match is: unknown protein (TAIR:AT5G14970.1); Has 35333 Blast hits to 34131 proteins in 2444 species: Archae - 798; Bacteria - 22429; Metazoa - 974; Fungi - 991; Plants - 531; Viruses - 0; Other Eukaryotes - 9610 (source: NCBI BLink).
Ghir_A02G013750	9.31064	3.86087	-1.14025	0.000287434	down	AT1G80300	nucleotide transporter 1
Ghir_A02G013770	12.7592	5.23839	-1.16621	0.00647121	down	AT3G15550	unknown protein; Has 25732 Blast hits to 16979 proteins in 961 species: Archae - 144; Bacteria - 1801; Metazoa - 12681; Fungi - 1868; Plants - 912; Viruses - 94; Other Eukaryotes - 8232 (source: NCBI BLink).
Ghir_A02G013940	0.835848	2.94492	1.95194	0.000207148	up	AT1G21460	Nodulin MtN3 family protein
Ghir_A02G013970	1.01733	69.8792	6.26678	2.90277e-29	up	AT4G25980	Peroxidase superfamily protein
Ghir_A02G013980	1.52167	0	-11.0867	0.000741686	down	AT5G16690	origin recognition complex subunit 3
Ghir_A02G014000	1.30133	0.188936	-2.65092	0.00638881	down	AT1G64990	GPCR-type G protein 1
Ghir_A02G014010	3.18589	13.1599	2.20189	1.12741e-10	up	AT5G16660	unknown protein; FUNCTIONS IN: molecular_function unknown; INVOLVED IN: biological_process unknown; LOCATED IN: chloroplast thylakoid membrane, chloroplast, membrane, chloroplast envelope; EXPRESSED IN: 23 plant structures; EXPRESSED DURING: 14 growth stages; BEST Arabidopsis thaliana protein match is: unknown protein (TAIR:AT3G02900.1); Has 30201 Blast hits to 17322 proteins in 780 species: Arch…
Ghir_A02G014020	0.715272	3.27508	2.31771	0.0239779	up	AT3G02890	RING/FYVE/PHD zinc finger superfamily protein
Ghir_A02G014050	0.112348	0	-7.19896	0.000111974	down	AT1G22430	GroES-like zinc-binding dehydrogenase family protein
Ghir_A02G014070	7.70613	1.12231	-2.64658	8.68032e-07	down	AT5G16650	Chaperone DnaJ-domain superfamily protein
Ghir_A02G014080	4.01874	0.414812	-3.1311	5.82542e-07	down	AT3G02910	AIG2-like (avirulence induced gene) family protein
Ghir_A02G014090	1.03231	0.0544185	-4.14458	0.00275553	down	AT4G17900	PLATZ transcription factor family protein
Ghir_A02G014100	3.79646	0.760913	-2.1936	8.57013e-19	down	AT4G27600	pfkB-like carbohydrate kinase family protein
Ghir_A02G014130	0.17014	0	-7.44371	0.00247455	down	AT3G11290	unknown protein; BEST Arabidopsis thaliana protein match is: unknown protein (TAIR:AT3G11310.1); Has 720 Blast hits to 435 proteins in 28 species: Archae - 0; Bacteria - 2; Metazoa - 0; Fungi - 32; Plants - 682; Viruses - 0; Other Eukaryotes - 4 (source: NCBI BLink).
Ghir_A02G014180	21.4909	98.6523	2.32753	9.15348e-10	up	AT2G23910	NAD(P)-binding Rossmann-fold superfamily protein
Ghir_A02G014230	0.589074	0.035464	-3.95895	0.0014783	down	AT5G19440	NAD(P)-binding Rossmann-fold superfamily protein
Ghir_A02G014280	8.25344	1.5273	-2.30144	0.000519932	down	AT5G10310	unknown protein; FUNCTIONS IN: molecular_function unknown; INVOLVED IN: biological_process unknown; LOCATED IN: endomembrane system; EXPRESSED IN: 17 plant structures; EXPRESSED DURING: 10 growth stages; BEST Arabidopsis thaliana protein match is: unknown protein (TAIR:AT3G13898.1); Has 1807 Blast hits to 1807 proteins in 277 species: Archae - 0; Bacteria - 0; Metazoa - 736; Fungi - 347; Plants -…
Ghir_A02G014290	5.72508	2.03211	-1.36977	0.00998958	down	AT4G08980	F-BOX WITH WD-40 2
Ghir_A02G014360	0.536929	0.220691	-1.14109	0.0248207	down	AT4G02750	Tetratricopeptide repeat (TPR)-like superfamily protein
Ghir_A02G014390	0.834245	0.026094	-4.67446	0.000425349	down	AT5G65300	unknown protein; Has 30201 Blast hits to 17322 proteins in 780 species: Archae - 12; Bacteria - 1396; Metazoa - 17338; Fungi - 3422; Plants - 5037; Viruses - 0; Other Eukaryotes - 2996 (source: NCBI BLink).
Ghir_A02G014400	82.0675	8.30471	-3.1752	2.49516e-07	down	AT2G22430	homeobox protein 6
Ghir_A02G014410	0.017648	0.181027	3.45483	7.16039e-05	up	AT4G01020	helicase domain-containing protein / IBR domain-containing protein / zinc finger protein-related
Ghir_A02G014430	0.808106	0	-9.59431	5.12326e-09	down	AT1G72210	basic helix-loop-helix (bHLH) DNA-binding superfamily protein
Ghir_A02G014450	0.106183	0.009352	-3.4086	0.0435233	down	AT1G74100	sulfotransferase 16
Ghir_A02G014490	6.33032	2.00155	-1.51966	0.0209083	down	AT4G24660	homeobox protein 22
Ghir_A02G014520	0.180321	0	-6.77542	0.00146779	down	AT4G38100	unknown protein; LOCATED IN: chloroplast thylakoid membrane; EXPRESSED IN: 23 plant structures; EXPRESSED DURING: 13 growth stages; BEST Arabidopsis thaliana protein match is: unknown protein (TAIR:AT4G01150.1); Has 30201 Blast hits to 17322 proteins in 780 species: Archae - 12; Bacteria - 1396; Metazoa - 17338; Fungi - 3422; Plants - 5037; Viruses - 0; Other Eukaryotes - 2996 (source: NCBI BLink…
Ghir_A02G014540	9.58786	0	-12.458	0.0342265	down	AT4G24570	dicarboxylate carrier 2
Ghir_A02G014570	0.706567	0.145337	-2.20886	0.0323884	down	AT5G10120	Ethylene insensitive 3 family protein
Ghir_A02G014620	12.3743	3.84794	-1.53364	3.71149e-05	down
Ghir_A02G014650	7.85562	46.6733	2.70143	1.86763e-08	up	AT5G10160	Thioesterase superfamily protein
Ghir_A02G014690	29.3191	2.51333	-3.4579	0.00107519	down
Ghir_A02G014750	0.333775	0.0468975	-2.53446	0.00222046	down
Ghir_A02G014810	0.77131	0	-8.85181	0.000194867	down
Ghir_A02G014820	3.72635	22.6974	2.75028	4.89274e-19	up	AT1G15100	RING-H2 finger A2A
Ghir_A02G014960	2.99752	5.721	1.07404	0.00197331	up	AT5G64860	disproportionating enzyme
Ghir_A02G014970	0.868073	0.134566	-2.51473	0.000160096	down	AT2G21960	unknown protein; LOCATED IN: chloroplast; EXPRESSED IN: 22 plant structures; EXPRESSED DURING: 13 growth stages; BEST Arabidopsis thaliana protein match is: unknown protein (TAIR:AT1G56180.1); Has 224 Blast hits to 222 proteins in 59 species: Archae - 0; Bacteria - 65; Metazoa - 0; Fungi - 0; Plants - 134; Viruses - 0; Other Eukaryotes - 25 (source: NCBI BLink).
Ghir_A02G015000	2.20772	0.598155	-1.79022	0.0014547	down	AT1G03430	histidine-containing phosphotransfer factor 5
Ghir_A02G015020	7.06079	0.134834	-5.5252	1.74549e-17	down	AT5G09960	FUNCTIONS IN: molecular_function unknown; INVOLVED IN: biological_process unknown; LOCATED IN: plasma membrane; EXPRESSED IN: 22 plant structures; EXPRESSED DURING: 13 growth stages; CONTAINS InterPro DOMAIN/s: RPM1-interacting protein 4, defence response (InterPro:IPR008700); BEST Arabidopsis thaliana protein match is: unknown protein (TAIR:AT5G64850.1); Has 30201 Blast hits to 17322 proteins in…
Ghir_A02G015130	6.42924	2.77992	-1.07113	2.29945e-08	down	AT4G09830	Uncharacterised conserved protein UCP009193
Ghir_A02G015170	0.794957	0.045073	-4.05556	1.30924e-05	down	AT5G61890	Integrase-type DNA-binding superfamily protein
Ghir_A02G015190	22.4733	3.1864	-2.71876	1.32642e-05	down	AT5G09880	Splicing factor, CC1-like
Ghir_A02G015210	4.49434	0.014433	-8.23564	1.76064e-06	down
Ghir_A02G015240	1.03326	0	-9.81395	1.58261e-05	down	AT3G57750	Protein kinase superfamily protein
Ghir_A02G015320	21.3191	5.60267	-1.76966	0.00733833	down	AT5G09830	BolA-like family protein
Ghir_A02G015400	0.0847623	0	-7.01421	0.0262078	down	AT1G79790	Haloacid dehalogenase-like hydrolase (HAD) superfamily protein
Ghir_A02G015410	2.37398	0.766025	-1.50534	0.000827307	down	AT3G18110	Pentatricopeptide repeat (PPR) superfamily protein
Ghir_A02G015420	47.4357	8.52458	-2.34781	0.0480565	down	AT3G03150	unknown protein; FUNCTIONS IN: molecular_function unknown; INVOLVED IN: biological_process unknown; LOCATED IN: mitochondrion; EXPRESSED IN: 22 plant structures; EXPRESSED DURING: 13 growth stages; BEST Arabidopsis thaliana protein match is: unknown protein (TAIR:AT5G17165.1); Has 39 Blast hits to 39 proteins in 11 species: Archae - 0; Bacteria - 0; Metazoa - 0; Fungi - 0; Plants - 39; Viruses - …
Ghir_A02G015430	2.20755	0.122137	-4.08305	4.49554e-07	down	AT5G17170	rubredoxin family protein
Ghir_A02G015450	10.9269	3.86105	-1.37428	5.07149e-06	down	AT3G03140	Tudor/PWWP/MBT superfamily protein
Ghir_A02G015530	13.9234	31.7896	1.3203	0.00857129	up	AT1G65060	4-coumarate:CoA ligase 3
Ghir_A02G015550	0.781626	0	-8.87071	0.00877098	down	AT4G25810	xyloglucan endotransglycosylase 6
Ghir_A02G015560	1.95686	0.402461	-2.15329	0.034968	down	AT3G60500	3'-5'-exoribonuclease family protein
Ghir_A02G015580	0.40918	1.98676	2.38589	0.00223926	up	AT5G16870	Peptidyl-tRNA hydrolase II (PTH2) family protein
Ghir_A02G015590	0.101013	0.404218	2.09785	0.0154153	up	AT5G16870	Peptidyl-tRNA hydrolase II (PTH2) family protein
Ghir_A02G015610	5.71047	1.97616	-1.38443	0.0039696	down	AT5G16830	syntaxin of plants 21
Ghir_A02G015670	9.77547	3.74546	-1.25569	1.93319e-07	down	AT5G16790	Tho complex subunit 7/Mft1p
Ghir_A02G015720	48.6175	4.30157	-3.35467	0.0235883	down	AT5G59970	Histone superfamily protein
Ghir_A02G015820	0.092292	1.51127	4.07503	0.00042076	up	AT4G39910	ubiquitin-specific protease 3
Ghir_A02G015850	1.54504	0.459701	-1.59847	0.000266927	down	AT4G39870	TLD-domain containing nucleolar protein
Ghir_A02G015930	14.9733	5.0519	-1.45115	0.0096998	down	AT4G39780	Integrase-type DNA-binding superfamily protein
Ghir_A02G015940	23.9518	5.70018	-1.93699	7.31725e-06	down	AT4G39790	Protein of unknown function (DUF630 and DUF632)
Ghir_A02G016070	0.0991163	0.0181935	-2.34437	0.0183186	down	AT5G65590	Dof-type zinc finger DNA-binding family protein
Ghir_A02G016110	0	0.123947	7.93069	9.76201e-05	up	AT5G10530	Concanavalin A-like lectin protein kinase family protein
Ghir_A02G016220	3.29209	0.86539	-1.76994	0.000739859	down	AT3G49640	Aldolase-type TIM barrel family protein
Ghir_A02G016270	0	1.34789	10.9284	3.25012e-15	up	AT4G37850	basic helix-loop-helix (bHLH) DNA-binding superfamily protein
Ghir_A02G016330	0.203628	0.0023965	-6.28483	0.000977027	down	AT2G22790	unknown protein; BEST Arabidopsis thaliana protein match is: unknown protein (TAIR:AT5G67020.1); Has 111 Blast hits to 111 proteins in 33 species: Archae - 0; Bacteria - 44; Metazoa - 0; Fungi - 0; Plants - 67; Viruses - 0; Other Eukaryotes - 0 (source: NCBI BLink).
Ghir_A02G016340	89.8424	270.487	1.73792	3.43194e-10	up	AT4G37830	cytochrome c oxidase-related
Ghir_A02G016390	0.178246	0	-7.74878	0.00133268	down	AT5G65740	zinc ion binding
Ghir_A02G016460	0.336364	0	-23.136	0.00107371	down	AT5G65820	Pentatricopeptide repeat (PPR) superfamily protein
Ghir_A02G016470	0.503027	0	-8.75634	0.00106229	down	AT2G14520	CBS domain-containing protein with a domain of unknown function (DUF21)
Ghir_A02G016480	4.89541	24.9348	2.48753	2.30333e-14	up	AT4G37760	squalene epoxidase 3
Ghir_A02G016490	1.20354	4.9568	2.1878	4.01085e-10	up	AT3G49750	receptor like protein 44
Ghir_A02G016520	0.620176	2.26792	2.02787	5.86228e-05	up	AT3G49760	basic leucine-zipper 5
Ghir_A02G016570	0.945588	0.0697135	-3.55374	0.00113559	down	AT4G37700	unknown protein; Has 64 Blast hits to 64 proteins in 11 species: Archae - 0; Bacteria - 0; Metazoa - 0; Fungi - 0; Plants - 64; Viruses - 0; Other Eukaryotes - 0 (source: NCBI BLink).
Ghir_A02G016660	0.0900647	1.6659	4.26535	0.00132536	up	AT3G49870	ADP-ribosylation factor-like A1C
Ghir_A02G016670	0.020044	0.816431	5.42194	6.16097e-05	up	AT5G63150	unknown protein; FUNCTIONS IN: molecular_function unknown; INVOLVED IN: biological_process unknown; LOCATED IN: mitochondrion; EXPRESSED IN: 22 plant structures; EXPRESSED DURING: 13 growth stages; CONTAINS InterPro DOMAIN/s: Protein of unknown function DUF1713, mitochondria (InterPro:IPR013177); Has 30201 Blast hits to 17322 proteins in 780 species: Archae - 12; Bacteria - 1396; Metazoa - 17338;…
Ghir_A02G016680	0.725453	0	-23.7041	1.19912e-06	down	AT5G67540	Arabinanase/levansucrase/invertase
Ghir_A02G016740	0.383229	0.067759	-2.33671	0.0170411	down	AT4G37630	cyclin d5;1
Ghir_A02G016820	20.3849	0.746707	-4.64285	2.0725e-07	down	AT5G67400	root hair specific 19
Ghir_A02G016840	0.0348293	3.37284	6.17922	1.27095e-06	up	AT2G23090	Uncharacterised protein family SERF
Ghir_A02G016860	3.1387	1.00567	-1.48856	0.000177644	down	AT5G67350	unknown protein; Has 1807 Blast hits to 1807 proteins in 277 species: Archae - 0; Bacteria - 0; Metazoa - 736; Fungi - 347; Plants - 385; Viruses - 0; Other Eukaryotes - 339 (source: NCBI BLink).
Ghir_A02G016870	3.00553	0.879045	-1.64951	0.00368562	down	AT4G37470	alpha/beta-Hydrolases superfamily protein
Ghir_A02G016960	5.94025	1.99569	-1.44276	0.0371164	down	AT4G24204	RING/U-box superfamily protein
Ghir_A02G017010	16.2691	3.12106	-2.26288	0.0122125	down	AT5G67270	end binding protein 1C
Ghir_A02G017110	2.24494	44.5787	4.44161	3.17632e-23	up	AT5G47820	P-loop containing nucleoside triphosphate hydrolases superfamily protein
Ghir_A02G017170	0.162844	0.0121875	-3.39641	0.0036932	down	AT5G67130	PLC-like phosphodiesterases superfamily protein
Ghir_A02G017210	0.56674	1.12872	1.16152	0.0259379	up	AT5G67020	unknown protein; BEST Arabidopsis thaliana protein match is: unknown protein (TAIR:AT3G50340.1); Has 1807 Blast hits to 1807 proteins in 277 species: Archae - 0; Bacteria - 0; Metazoa - 736; Fungi - 347; Plants - 385; Viruses - 0; Other Eukaryotes - 339 (source: NCBI BLink).
Ghir_A02G017270	2.06226	0.167585	-3.36313	0.003932	down
Ghir_A02G017280	1.28824	0.0268285	-5.48959	1.25144e-09	down	AT4G33985	Protein of unknown function (DUF1685)
Ghir_A02G017330	12.2231	1.44647	-2.93294	1.75051e-06	down	AT4G36990	heat shock factor 4
Ghir_A02G017400	0.217216	0	-7.84376	1.59764e-05	down	AT3G50620	P-loop containing nucleoside triphosphate hydrolases superfamily protein
Ghir_A02G017490	0.702175	0.0131275	-5.59196	2.38623e-09	down	AT2G15790	peptidyl-prolyl cis-trans isomerase / cyclophilin-40 (CYP40) / rotamase
Ghir_A02G017500	2.00507	0.454136	-1.99996	8.08821e-06	down	AT4G37180	Homeodomain-like superfamily protein
Ghir_A02G017530	0.359593	0	-8.22616	4.35104e-06	down	AT3G50410	OBF binding protein 1
Ghir_A02G017550	0.663541	0	-8.33655	5.48525e-06	down
Ghir_A02G017560	4.09536	0.21807	-4.06604	1.35441e-25	down	AT4G31650	Transcriptional factor B3 family protein
Ghir_A02G017610	4.07095	0.735971	-2.30563	1.23579e-06	down	AT3G18990	AP2/B3-like transcriptional factor family protein
Ghir_A02G017620	1.36587	0.485175	-1.36923	0.0149386	down	AT2G23470	Protein of unknown function, DUF647
Ghir_A02G017630	2.8061	1.21057	-1.04743	0.0485467	down	AT2G23460	extra-large G-protein 1
Ghir_A02G017820	0.175003	0.007186	-4.21991	0.00532055	down	AT3G50760	galacturonosyltransferase-like 2
Ghir_A02G017940	0.882986	0.224279	-1.852	2.12083e-05	down	AT2G18630	Protein of unknown function (DUF677)
Ghir_A02G017960	3.7854	9.35617	1.44028	2.18362e-08	up	AT4G36750	Quinone reductase family protein
Ghir_A02G017970	9.51466	1.44113	-2.53893	0.010543	down	AT2G18550	homeobox protein 21
Ghir_A02G017980	0.507963	1.21216	1.39304	0.0391469	up	AT4G36710	GRAS family transcription factor
Ghir_A02G018040	15.8625	4.83744	-1.59086	0.00537886	down	AT3G50690	Leucine-rich repeat (LRR) family protein
Ghir_A02G018090	3.39887	19.5081	2.67725	9.53686e-06	up	AT4G36640	Sec14p-like phosphatidylinositol transfer family protein
Ghir_A02G018190	2.38369	0.811222	-1.38812	0.0196947	down	AT5G66550	Maf-like protein
Ghir_A02G018250	1.52636	0	-10.8725	1.69659e-11	down	AT2G18290	anaphase promoting complex 10
Ghir_A02G018260	2.65591	0.507335	-2.24995	1.57158e-32	down	AT4G36530	alpha/beta-Hydrolases superfamily protein
Ghir_A02G018270	0.897381	0	-24.8935	3.22305e-18	down	AT2G21600	endoplasmatic reticulum retrieval protein 1B
Ghir_A02G018290	9.09499	31.3775	1.93743	9.76772e-16	up	AT1G19580	gamma carbonic anhydrase 1
Ghir_A02G018450	0.826822	0.205759	-1.87131	0.00718741	down	AT5G66360	Ribosomal RNA adenine dimethylase family protein
Ghir_A02G018490	16.6357	51.9351	1.78892	6.17182e-06	up	AT4G36250	aldehyde dehydrogenase 3F1
Ghir_A02G018500	4.22976	1.07409	-1.84781	0.000177356	down	AT3G54340	K-box region and MADS-box transcription factor family protein
Ghir_A02G018550	6.46295	1.49733	-1.99416	0.023283	down	AT4G36180	Leucine-rich receptor-like protein kinase family protein
Ghir_A02G018560	8.83625	32.9115	2.03255	2.97609e-20	up	AT1G19910	ATPase, F0/V0 complex, subunit C protein
Ghir_A02G018590	5.26247	2.12743	-1.16716	0.0162931	down	AT5G66290	unknown protein; FUNCTIONS IN: molecular_function unknown; INVOLVED IN: N-terminal protein myristoylation; LOCATED IN: cellular_component unknown; EXPRESSED IN: 14 plant structures; EXPRESSED DURING: 7 growth stages; Has 1807 Blast hits to 1807 proteins in 277 species: Archae - 0; Bacteria - 0; Metazoa - 736; Fungi - 347; Plants - 385; Viruses - 0; Other Eukaryotes - 339 (source: NCBI BLink).
Ghir_A02G018630	0.290194	1.97839	2.81983	0.0153009	up	AT2G17972	unknown protein; FUNCTIONS IN: molecular_function unknown; INVOLVED IN: biological_process unknown; LOCATED IN: chloroplast thylakoid membrane, chloroplast; EXPRESSED IN: 22 plant structures; EXPRESSED DURING: 14 growth stages; Has 34 Blast hits to 34 proteins in 17 species: Archae - 0; Bacteria - 0; Metazoa - 0; Fungi - 0; Plants - 34; Viruses - 0; Other Eukaryotes - 0 (source: NCBI BLink).
Ghir_A02G018730	0.57022	0.0415625	-3.52173	0.000624512	down	AT5G66160	receptor homology region transmembrane domain ring H2 motif protein 1
Ghir_A02G018760	0.00902433	0.89842	6.83994	2.16812e-05	up	AT5G66150	Glycosyl hydrolase family 38 protein
Ghir_A02G018780	0.104754	0.255426	1.42236	0.0488681	up	AT2G17820	histidine kinase 1
Ghir_A02G018810	14.3377	3.92485	-1.74823	0.00545058	down	AT3G51290	Protein of unknown function (DUF630) ;Protein of unknown function (DUF632)
Ghir_A02G018840	0.14982	113.99	9.70436	3.62049e-91	up	AT1G75900	GDSL-like Lipase/Acylhydrolase superfamily protein
Ghir_A02G018850	2.75601	0.46074	-2.43027	9.59739e-23	down	AT4G35930	F-box family protein
Ghir_A02G018960	32.9196	12.9934	-1.21648	0.0205899	down	AT2G27090	Protein of unknown function (DUF630 and DUF632)
Ghir_A02G019010	5.3811	23.5946	2.27456	1.83079e-12	up	AT2G17705	unknown protein; FUNCTIONS IN: molecular_function unknown; INVOLVED IN: biological_process unknown; LOCATED IN: plasma membrane; EXPRESSED IN: cultured cell; BEST Arabidopsis thaliana protein match is: unknown protein (TAIR:AT4G08330.1); Has 135 Blast hits to 135 proteins in 32 species: Archae - 5; Bacteria - 29; Metazoa - 0; Fungi - 0; Plants - 91; Viruses - 0; Other Eukaryotes - 10 (source: NCB…
Ghir_A02G019050	18.5265	7.55627	-1.15367	0.0157981	down	AT4G35785	RNA-binding (RRM/RBD/RNP motifs) family protein
Ghir_A02G019150	2.352	6.69772	1.64813	3.12694e-06	up	AT3G51390	DHHC-type zinc finger family protein
Ghir_A02G019260	5.22787	0.560787	-3.0865	0.00113314	down	AT1G53160	squamosa promoter binding protein-like 4
Ghir_A02G019270	1.96228	0.563878	-1.69931	0.0312982	down	AT4G35640	serine acetyltransferase 3;2
Ghir_A02G019310	0.322927	2.45341	3.1162	0.022481	up	AT3G51460	Phosphoinositide phosphatase family protein
Ghir_A02G019370	0.199718	0	-22.7708	3.02537e-07	down	AT2G17550	unknown protein; Has 264 Blast hits to 258 proteins in 65 species: Archae - 5; Bacteria - 5; Metazoa - 66; Fungi - 16; Plants - 107; Viruses - 0; Other Eukaryotes - 65 (source: NCBI BLink).
Ghir_A02G019420	2.44494	21.4974	3.28735	7.47416e-64	up	AT4G35500	Protein kinase superfamily protein
Ghir_A02G019520	0.0380107	3.63704	6.69233	2.96477e-18	up	AT1G20925	Auxin efflux carrier family protein
Ghir_A02G019560	2.91423	0.977692	-1.43649	6.36805e-07	down	AT4G10925	Nuclear transport factor 2 (NTF2) family protein
Ghir_A02G019640	4.34073	1.91957	-1.02835	4.11509e-05	down	AT1G33780	Protein of unknown function (DUF179)
Ghir_A02G019680	0	0.442082	8.63985	5.01357e-11	up	AT1G26800	RING/U-box superfamily protein
Ghir_A02G019690	20.3566	5.33544	-1.80143	1.33378e-05	down	AT2G25720	unknown protein; Has 38 Blast hits to 38 proteins in 18 species: Archae - 0; Bacteria - 0; Metazoa - 0; Fungi - 0; Plants - 38; Viruses - 0; Other Eukaryotes - 0 (source: NCBI BLink).
Ghir_A02G019710	15.2397	1.14346	-3.62611	0.00246232	down	AT2G34160	Alba DNA/RNA-binding protein
Ghir_A03G000020	5.13257	12.0998	1.39077	1.40977e-05	up	AT4G12340	copper ion binding
Ghir_A03G000090	2.08263	0.169396	-3.55501	0.00975306	down	AT4G25315	Expressed protein
Ghir_A03G000180	16.8322	47.5394	1.64523	0.000148913	up	AT1G32050	SCAMP family protein
Ghir_A03G000190	29.7243	13.3298	-1.01556	0.0435558	down	AT1G31970	DEA(D/H)-box RNA helicase family protein
Ghir_A03G000200	0.124407	0	-21.6062	1.42884e-06	down	AT5G45500	RNI-like superfamily protein
Ghir_A03G000280	0.180012	0	-6.33665	0.0025596	down	AT2G35530	basic region/leucine zipper transcription factor 16
Ghir_A03G000300	1.91682	0.721282	-1.29911	0.044917	down	AT1G32200	phospholipid/glycerol acyltransferase family protein
Ghir_A03G000390	4.86072	8.79351	1.008	0.00155963	up	AT2G35470	unknown protein; Has 25 Blast hits to 25 proteins in 8 species: Archae - 0; Bacteria - 0; Metazoa - 0; Fungi - 0; Plants - 25; Viruses - 0; Other Eukaryotes - 0 (source: NCBI BLink).
Ghir_A03G000400	2.41635	5.54358	1.3746	0.0303545	up	AT4G23620	Ribosomal protein L25/Gln-tRNA synthetase, anti-codon-binding domain
Ghir_A03G000440	4.91744	1.90623	-1.23984	1.15665e-05	down	AT1G32330	heat shock transcription factor A1D
Ghir_A03G000450	2.00827	15.5876	3.0293	0.00632284	up	AT4G25960	P-glycoprotein 2
Ghir_A03G000470	0.199234	0	-6.61359	0.00210085	down	AT4G17790	SNARE associated Golgi protein family
Ghir_A03G000500	2.52207	0.322109	-2.82518	1.33102e-06	down	AT2G35410	RNA-binding (RRM/RBD/RNP motifs) family protein
Ghir_A03G000530	4.85949	1.07251	-2.05399	0.000129686	down	AT5G46720	AIG2-like (avirulence induced gene) family protein
Ghir_A03G000580	2.4021	4.74507	1.11787	0.000112342	up	AT3G13940	DNA binding;DNA-directed RNA polymerases
Ghir_A03G000650	5.68518	44.8044	3.11299	2.25617e-13	up	AT4G17830	Peptidase M20/M25/M40 family protein
Ghir_A03G000700	3.59036	7.29223	1.19269	0.0177907	up	AT5G46630	Clathrin adaptor complexes medium subunit family protein
Ghir_A03G000790	0.292002	0.0535635	-2.25008	1.28039e-05	down	AT1G32450	nitrate transporter 1.5
Ghir_A03G000810	0.174016	0	-6.23441	0.00206979	down	AT4G18030	S-adenosyl-L-methionine-dependent methyltransferases superfamily protein
Ghir_A03G000820	3.27079	0.888005	-1.76625	0.0281758	down	AT5G46560	CONTAINS InterPro DOMAIN/s: Inner nuclear membrane protein MAN1 (InterPro:IPR018996); Has 58 Blast hits to 58 proteins in 29 species: Archae - 0; Bacteria - 4; Metazoa - 11; Fungi - 15; Plants - 20; Viruses - 0; Other Eukaryotes - 8 (source: NCBI BLink).
Ghir_A03G000840	6.06699	37.1628	2.75958	1.57037e-23	up	AT5G45420	Duplicated homeodomain-like superfamily protein
Ghir_A03G001000	0.152495	1.04375	2.90447	0.0146622	up	AT3G01680	CONTAINS InterPro DOMAIN/s: Mediator complex subunit Med28 (InterPro:IPR021640); BEST Arabidopsis thaliana protein match is: unknown protein (TAIR:AT3G01670.1); Has 122 Blast hits to 112 proteins in 13 species: Archae - 0; Bacteria - 0; Metazoa - 0; Fungi - 0; Plants - 122; Viruses - 0; Other Eukaryotes - 0 (source: NCBI BLink).
Ghir_A03G001060	0.0685723	0	-6.87606	0.0436874	down	AT4G17570	GATA transcription factor 26
Ghir_A03G001080	0.543862	2.60274	2.40978	0.000216362	up	AT5G47180	Plant VAMP (vesicle-associated membrane protein) family protein
Ghir_A03G001100	7.63482	17.1932	1.29717	0.0281998	up
Ghir_A03G001160	4.49949	1.11732	-1.85178	8.7296e-09	down	AT4G16845	VEFS-Box of polycomb protein
Ghir_A03G001170	157.232	3.3989	-5.3958	1.51439e-19	down	AT5G47230	ethylene responsive element binding factor 5
Ghir_A03G001180	0.064636	0	-5.94026	0.000695539	down	AT5G47240	nudix hydrolase homolog 8
Ghir_A03G001220	2.2334	0.835	-1.30351	0.00711199	down
Ghir_A03G001230	3.78645	1.41713	-1.30984	0.0102824	down	AT2G39810	ubiquitin-protein ligases
Ghir_A03G001250	0.861402	0	-9.95596	6.60038e-07	down	AT4G17430	O-fucosyltransferase family protein
Ghir_A03G001260	0.302689	0.0193765	-3.79119	0.00591713	down	AT2G35700	ERF family protein 38
Ghir_A03G001270	32.3165	10.2011	-1.5263	0.000806557	down
Ghir_A03G001300	1.84829	0.185095	-3.15796	0.00580678	down
Ghir_A03G001330	2.27749	0	-25.3111	5.87694e-05	down	AT4G17350	Plant protein of unknown function (DUF828) with plant pleckstrin homology-like region
Ghir_A03G001340	0	0.077927	6.72424	0.00385543	up	AT5G47450	tonoplast intrinsic protein 2;3
Ghir_A03G001510	4.98931	9.16036	1.02474	0.000565136	up	AT1G62620	Flavin-binding monooxygenase family protein
Ghir_A03G001560	0.75063	1.9879	1.54466	0.00103807	up	AT4G22590	Haloacid dehalogenase-like hydrolase (HAD) superfamily protein
Ghir_A03G001710	0.132481	0.0050635	-4.49146	0.00324306	down	AT1G12390	Cornichon family protein
Ghir_A03G001760	6.75763	2.79982	-1.14337	7.17311e-05	down	AT1G62850	Class I peptide chain release factor
Ghir_A03G001840	1.10707	4.58397	2.19801	4.06545e-06	up	AT4G12320	cytochrome P450, family 706, subfamily A, polypeptide 6
Ghir_A03G001900	0.046142	0	-5.22475	0.00890372	down	AT1G12500	Nucleotide-sugar transporter family protein
[truncated: 14,575 more rows]

## Sheet: L1 5DPA vs L1 10DPA
Table S5-3. The differentially expressed genes (DEGs) of each pair-wise comparison of L1 5DPA vs L1 10DPA
[truncated: 10,259 more rows]

[truncated: 3 more sheets: L2 -3DPA vs L2 0DPA, L2 0DPA vs L2 5DPA, L2 5DPA vs L2 10DPA]
