# Supplementary material for: Co-expression network and comparative transcriptome analysis for fiber initiation and elongation reveal genetic differences in two lines from upland cotton CCRI70 RIL population
Source: PeerJ. 2021 Jul 21;9:e11812. doi: 10.7717/peerj.11812 (PMC8308610; doi:10.7717/peerj.11812)
Supplement: Supplemental Information 7 [file peerj-09-11812-s007.xlsx]

## Sheet: upregulated in L2 on 0DPA.
Table S7-1. FPKMs and functional categories of genes significantly upregulated in L2 on 0DPA.
Gene Name	0DPA L1 FPKM	0DPA L2 FPKM	Description in Arabidopsis thaliana
Pentose and glucuronate interconversions
Ghir_D05G007240	2.69149	6.39111	aldehyde dehydrogenase 3F1
Carbon metabolism
Ghir_A07G018170	0.01	5.19	Pyridoxal phosphate (PLP)-dependent transferases superfamily protein
Ghir_A05G006080	1.92	10.78	aldehyde dehydrogenase 11A3
Biosynthesis of secondary metabolites
Ghir_D07G015730	0	0.577752	D-isomer specific 2-hydroxyacid dehydrogenase family protein
Ghir_D08G003000	0.001429	2.0368	Dihydrolipoamide succinyltransferase
Ghir_A07G002780	2.40758	5.93811	aspartate aminotransferase 3
Ghir_D04G002170	3.70689	7.72447	Glutamyl/glutaminyl-tRNA synthetase, class Ic
Ghir_A06G019500	0.613357	5.3907	acetyl-CoA synthetase
Ghir_A09G001070	2.55736	14.2537	Glycosyl transferase, family 35
Ghir_D04G011360	2.16892	29.3311	Aldolase superfamily protein
Ghir_D08G011800	0.719034	85.4769	UDP-Glycosyltransferase superfamily protein
Metabolic pathways
Ghir_D12G002180	4.1895	8.98839	S-methyl-5-thioribose kinase
Ghir_D10G004420	0	7.91935	light-harvesting chlorophyll-protein complex II subunit B1
Oxidative phosphorylation
Ghir_D06G011740	0.847412	8.99048	H(+)-ATPase 5
Plant hormone signal transduction
Ghir_D05G029470	1.21098	5.97769	Protein kinase superfamily protein

## Sheet: downregulated in L2 on 0DPA.
Table S7-2. FPKMs and functional categories of genes significantly downregulated in L2 on 0DPA.
Gene Name	0DPA L1 FPKM	0DPA L2 FPKM	Description in Arabidopsis thaliana
Galactose metabolism
Ghir_D13G006000	4.79764	1.76891	alpha-galactosidase 2
Metabolic pathways
Ghir_D02G021260	4.085	0.712819	Inositol 1,3,4-trisphosphate 5/6-kinase family protein
Ghir_A02G010860	3.91884	0	AMP-dependent synthetase and ligase family protein
Oxidative phosphorylation
Ghir_D11G035050	30.638	1.89726	NAD(P)H dehydrogenase subunit H
Protein processing in endoplasmic reticulum
Ghir_A03G000310	1.8366	0.48054	Defender against death (DAD family) protein
Ghir_D10G008560	7.35468	0	translocon-associated protein beta (TRAPB) family protein
Ghir_A13G013590	378.833	9.5923	ATHSP90.4, HEAT SHOCK PROTEIN 81.4
Starch and sucrose metabolism
Ghir_A10G010640	3.06647	0.856605	beta-amylase 1
Ghir_D06G012250	3.83331	0	disproportionating enzyme 2
