# Supplementary material for: Co-expression network and comparative transcriptome analysis for fiber initiation and elongation reveal genetic differences in two lines from upland cotton CCRI70 RIL population
Source: PeerJ. 2021 Jul 21;9:e11812. doi: 10.7717/peerj.11812 (PMC8308610; doi:10.7717/peerj.11812)
Supplement: Supplemental Information 8 [file peerj-09-11812-s008.xlsx]

## Sheet: upregulated in L2 on 5DPA.
Table S8-1. FPKMs and functional categories of genes significantly upregulated in L2 on 5DPA.
Gene Name	5DPA L1 FPKM	5DPA L2 FPKM	Description in Arabidopsis thaliana
SNARE interactions in vesicular transport
Ghir_A13G021680	3.82718	6.93999	syntaxin of plants 32
Ghir_A11G013660	0.235043	1.36911	BET1P/SFT1P-like protein 14A
Ghir_A11G006910	30.2006	62.662	Syntaxin/t-SNARE family protein
Ghir_D11G007650	0	2.00494	Vesicle transport v-SNARE family protein
Ghir_A11G025370	1.80972	3.28518	syntaxin of plants 131
Ghir_D05G001330	3.48817	6.11992	syntaxin of plants 32
Cysteine and methionine metabolism
Ghir_D09G022290	0	2.31034	O-acetylserine (thiol) lyase (OAS-TL) isoform A1
Ghir_D02G002350	4.65461	64.7261	S-adenosyl-L-homocysteine hydrolase
Ghir_A09G015500	6.37862	12.1863	methionine adenosyltransferase 3
Ghir_A09G023340	7.04362	14.0843	RmlC-like cupins superfamily protein
Ghir_A01G005360	1.2672	2.58269	haloacid dehalogenase-like hydrolase family protein
Ghir_A12G024510	0.32201	13.7365	1-aminocyclopropane-1-carboxylic acid (acc) synthase 6
Proteasome
Ghir_D07G015790	15.1289	29.9986	N-terminal nucleophile aminohydrolases (Ntn hydrolases) superfamily protein
Ghir_D04G019790	10.8475	19.5792	N-terminal nucleophile aminohydrolases (Ntn hydrolases) superfamily protein
Ghir_A03G022250	2.87641	5.00259	20S proteosomal alpha subunits. Interacts with SnRK, SKP1/ASK1 during proteasomal binding of an SCF ubiquitin ligase.
Protein processing in endoplasmic reticulum
Ghir_D07G013760	0.02991	3.3978	thioredoxin family protein
Ghir_D08G018730	0.123108	1.41112	mitochondrion-localized small heat shock protein 23.6
Ghir_D02G005730	0.714888	2.23275	Ras-related small GTP-binding family protein
Ghir_D05G036580	2.25197	3.98886	RING membrane-anchor 3
Ghir_D13G012320	12.6162	33.3401	secretion-associated RAS 1B
Ghir_D07G018340	3.25015	6.93425	PDI-like 2-2
Fatty acid elongation
Ghir_A10G021690	0.0227565	7.57815	3-ketoacyl-CoA synthase 19
Ghir_A02G003890	4.20747	10.4399	3-hydroxyacyl-CoA dehydratase 1
Plant-pathogen interaction
Ghir_A04G009910	0	2.79334	calcium-dependent protein kinase 13
Ghir_A12G011610	2.17721	4.10222	MAP kinase 4
Ghir_A05G007880	0	34.4377	calmodulin 5
Circadian rhythm - plant
Ghir_D09G016400	0.095815	1.45936	pseudo-response regulator 7
Ascorbate and aldarate metabolism
Ghir_D08G021420	0	3.17416	Plant L-ascorbate oxidase
Ghir_D12G024400	0.0308675	5.7787	UDP-glucose 6-dehydrogenase family protein
C5-Branched dibasic acid metabolism
Ghir_D04G016280	0	4.26491	Aconitase/3-isopropylmalate dehydratase protein
Arginine and proline metabolism
Ghir_A06G014980	0	2.38582	ornithine-delta-aminotransferase
Ghir_D07G006390	6.49877	24.8766	porphyromonas-type peptidyl-arginine deiminase family protein

## Sheet: downregulated in L2 on 5DPA.
Table S8-2. FPKMs and functional categories of genes significantly upregulated in L2 on 5DPA.
Gene Name	5DPA L1 FPKM	5DPA L2 FPKM	Description in Arabidopsis thaliana
Plant hormone signal transduction
Ghir_A09G008480	1.90194	0.566464	NPR1-like protein 3
Ghir_D05G031820	0.999579	0	jasmonate-zim-domain protein 3
Ghir_A05G002590	7.761	2.09409	phytochrome-associated protein 2
Ghir_D09G022910	1.06879	0.060963	AUX/IAA transcriptional regulator family protein
Ghir_D03G003390	8.96382	1.76183	indole-3-acetic acid inducible 9
Ghir_D02G021930	3.22284	0.940764	CYCLIN D3;1
Ghir_D11G012040	5.74191	2.48345	ethylene response sensor 1
Ghir_D05G029470	4.76312	1.05417	Protein kinase superfamily protein
Ghir_D02G004190	7.09087	2.32299	Signal transduction histidine kinase, hybrid-type, ethylene sensor
Ghir_D12G016740	2.10415	0.509645	CHASE domain containing histidine kinase protein
Ghir_A13G019360	1.2758	0.264247	response regulator 12
Ghir_D05G020640	1.38999	0.433445	BRI1 kinase inhibitor 1
Ghir_D05G003750	4.28907	1.44885	Transcriptional factor B3 family protein / auxin-responsive factor AUX/IAA-related
Ghir_A13G002650	9.31711	2.84262	CHASE domain containing histidine kinase protein
Ghir_A01G022010	2.03523	0.536917	Transmembrane amino acid transporter family protein
Ghir_D12G011080	3.26814	1.13469	SAUR-like auxin-responsive protein family
Ghir_A12G013850	6.31014	2.49138	ethylene response sensor 1
Ghir_A03G013050	7.75884	3.24555	Brassinosteroid signalling positive regulator (BZR1) family protein
Ghir_A01G010000	6.92516	0.044507	Transcriptional factor B3 family protein / auxin-responsive factor AUX/IAA-related
Ghir_D05G001850	3.10773	0.761106	EIN3-binding F box protein 1
Ghir_D05G022030	1.42822	0.00706433	indole-3-acetic acid inducible 9
Ghir_D13G020100	1.64984	0.355066	response regulator 12
Ghir_A05G001650	2.01808	0.350384	EIN3-binding F box protein 1
Phenylalanine metabolism
Ghir_D07G008950	4.2245	1.5866	phytoene desaturation 1
Ghir_D10G022670	7.64729	1.65209	PHE ammonia lyase 1
Ghir_A05G005960	10.2128	2.54891	aspartate aminotransferase 5
Ghir_A03G006700	2.64504	0.671199	Copper amine oxidase family protein
Ghir_A08G018110	1.19036	0.251772	Copper amine oxidase family protein
Ghir_A10G020870	4.63438	0.884309	phenylalanine ammonia-lyase 2
Brassinosteroid biosynthesis
Ghir_D07G019590	1.87405	0.202404	brassinosteroid-6-oxidase 2
Galactose metabolism
Ghir_A06G009210	2.73464	0.0267137	Glycosyl hydrolases family 32 protein
Ghir_A13G020000	19.9008	4.83135	6-&1-fructan exohydrolase
Ghir_A13G022980	2.36162	0	hexokinase-like 1
Ghir_D03G005750	1.08146	0.150338	Glycosyl hydrolases family 32 protein
Ghir_A08G018790	1.05515	0.0725303	UDP-D-glucose/UDP-D-galactose 4-epimerase 1
Starch and sucrose metabolism
Ghir_A07G008340	2.27053	0.57749	B-S glucosidase 44
Ghir_A09G005920	15.458	1.31632	B-S glucosidase 44
Ghir_D01G021600	5.62009	1.43289	starch branching enzyme 2.2
Ghir_A08G008770	2.06689	0.424979	O-Glycosyl hydrolases family 17 protein
Ghir_A10G010640	2.46473	0.329938	beta-amylase 1
Ghir_A12G013820	3.05172	0.644452	cellulose synthase-like D5
Ghir_A13G020210	8.41807	0	sucrose synthase 4
Ghir_D01G015430	1.44941	0.26037	O-Glycosyl hydrolases family 17 protein
Ghir_D04G012760	3.01827	0.324747	UDP-glucuronic acid decarboxylase 1
Ghir_D05G014410	7.96435	2.6488	pectin methylesterase 3
Ghir_D08G008900	3.91238	0.957572	O-Glycosyl hydrolases family 17 protein
Metabolic pathways
Ghir_D10G026370	5.77086	1.23993	light harvesting complex photosystem II
Ghir_D07G023800	1.38667	0.53715	L-aspartate oxidase
Ghir_A02G011560	2.56772	0.031617	nuclear RNA polymerase A1
Ghir_A04G007780	1.05913	0.385686	phosphatidyl inositol monophosphate 5 kinase
Ghir_D09G024690	6.46956	0	ATP synthase D chain, mitochondrial
Ghir_A03G003780	1.16009	0.387253	phosphatidate cytidylyltransferase family protein
Ghir_A03G007000	4.30026	1.06372	biotin F
Ghir_A04G015100	1.08181	0	urease
Ghir_A11G020530	1.8231	0	DNA-directed DNA polymerases
Ghir_A13G020680	5.15252	1.52165	cytidine deaminase 1
Ghir_D02G003960	11.3634	2.12513	RmlC-like cupins superfamily protein
Ghir_D01G010960	10.8407	1.84733	vacuolar proton ATPase A3
Ghir_D04G019780	5.02173	0	urease
Ghir_D09G022690	11.3182	4.23887	Pseudouridine synthase/archaeosine transglycosylase-like family protein
Ghir_A03G019630	1.20406	0	aldehyde dehydrogenase 6B2
Ghir_A07G002590	1.65944	0.51489	NADP-malic enzyme 3
Ghir_D02G004000	2.03341	0.805166	ATP sulfurylase 1
Ghir_D03G011340	2.93588	0.912644	S-adenosyl-L-homocysteine hydrolase
Ghir_D09G019570	4.84454	0.347809	glutamate-cysteine ligase
Ghir_D06G018750	5.39587	1.0525
Ghir_A11G016560	19.9973	5.50954	Pyridoxal phosphate (PLP)-dependent transferases superfamily protein
Ghir_D09G023850	2.63572	0.615168	2-oxoglutarate (2OG) and Fe(II)-dependent oxygenase superfamily protein
Ghir_D13G014100	1.4791	0.530882	photosystem I subunit G
Ghir_D02G015240	1.87564	0.36667	DNA primase, large subunit family
Ghir_A01G015470	2.11958	0.625263	vacuolar protein sorting 34
Ghir_D07G019150	9.78576	3.39287	glutamine synthase clone R1
Biosynthesis of secondary metabolites
Ghir_A01G001280	1.33352	0	Peroxidase superfamily protein
Ghir_A02G005970	14.1245	2.99377	S-adenosylmethionine synthetase family protein
Ghir_A04G013900	2.25675	0.25449	Inositol monophosphatase family protein
Ghir_A04G014110	2.01689	0	FAD/NAD(P)-binding oxidoreductase family protein
Ghir_A07G015620	25.5582	10.2466	Transketolase
Ghir_A09G000490	1.5643	0.228668	gibberellin 20 oxidase 2
Ghir_A09G000540	1.79744	0	phosphatidyl serine synthase family protein
Ghir_A09G010180	4.01312	0.078352	tRNAisopentenyltransferase 2
Ghir_A11G006250	2.61062	0.796197	alcohol dehydrogenase 1
Ghir_A11G022120	8.04357	1.40698	cinnamyl alcohol dehydrogenase 6
Ghir_A12G001790	2.46852	0.00796567	Undecaprenyl pyrophosphate synthetase family protein
Ghir_A13G006870	8.06341	0.39633	3-deoxy-d-arabino-heptulosonate 7-phosphate synthase
Ghir_D01G001240	2.14674	0	Peroxidase superfamily protein
Ghir_D02G007260	3.09926	1.0811	15-cis-zeta-carotene isomerase
Ghir_D03G004140	1.4326	0.108258	sulfotransferase 16
Ghir_D04G012460	3.70162	1.07841	purine biosynthesis 4
Ghir_D07G001140	1.21494	0	ACC oxidase 1
Ghir_D07G006170	1.49583	0.156856
Ghir_D07G006540	8.38762	2.00019	ketol-acid reductoisomerase
Ghir_D07G024380	10.9244	1.32142	glucose-6-phosphate dehydrogenase 6
Ghir_D08G017060	1.0299	0.0262987	phospholipid/glycerol acyltransferase family protein
Ghir_D09G000450	1.84353	0.361978	gibberellin 20 oxidase 2
Ghir_D09G006610	8.20585	0.023329	dehydroquinate dehydratase, putative / shikimate dehydrogenase, putative
Ghir_D10G012520	7.17729	1.79938
Ghir_D11G010080	6.23888	2.05245	Galactose mutarotase-like superfamily protein
Ghir_D11G016280	2.35416	0	ethylene-forming enzyme
Ghir_D11G019410	2.53434	0	Galactose mutarotase-like superfamily protein
Ghir_D11G022270	4.58235	1.26731	cinnamyl alcohol dehydrogenase 6
Ghir_D12G004900	1.25785	0.169208	AICARFT/IMPCHase bienzyme family protein
