# Supplementary material for: Co-expression network and comparative transcriptome analysis for fiber initiation and elongation reveal genetic differences in two lines from upland cotton CCRI70 RIL population
Source: PeerJ. 2021 Jul 21;9:e11812. doi: 10.7717/peerj.11812 (PMC8308610; doi:10.7717/peerj.11812)
Supplement: Supplemental Information 9 [file peerj-09-11812-s009.xlsx]

## Sheet: Sheet1
Table S9. SNP variant annotation
Variant Type	Variant Number	Percentage (%)
intergenic_region	43470	18.1508
upstream_gene_variant	40365	16.8544
downstream_gene_variant	36733	15.3378
intron_variant	25829	10.7849
3_prime_UTR_variant	23666	9.88171
missense_variant	19695	8.22362
5_prime_UTR_variant	18866	7.87747
synonymous_variant	12953	5.40851
frameshift_variant	7981	3.33246
splice_region_variant&intron_variant	3346	1.39712
splice_donor_variant&intron_variant	1492	0.622983
5_prime_UTR_premature_start_codon_gain_variant	894	0.373289
splice_acceptor_variant&intron_variant	813	0.339467
stop_gained	599	0.250112
missense_variant&splice_region_variant	433	0.180799
frameshift_variant&splice_region_variant	423	0.176623
stop_lost	380	0.158669
splice_region_variant&synonymous_variant	265	0.11065
conservative_inframe_insertion	257	0.10731
splice_region_variant	236	0.0985415
disruptive_inframe_insertion	189	0.0789167
frameshift_variant&stop_gained	110	0.0459304
stop_retained_variant	101	0.0421724
frameshift_variant&start_lost	82	0.034239
conservative_inframe_deletion	71	0.029646
frameshift_variant&stop_lost	63	0.0263056
disruptive_inframe_deletion	48	0.0200423
stop_lost&splice_region_variant	28	0.0116914
start_lost	21	0.00876852
frameshift_variant&stop_lost&splice_region_variant	20	0.00835097
stop_gained&splice_region_variant	18	0.00751588
splice_region_variant&stop_retained_variant	9	0.00375794
stop_gained&conservative_inframe_insertion	6	0.00250529
conservative_inframe_insertion&splice_region_variant	4	0.00167019
initiator_codon_variant	4	0.00167019
start_lost&disruptive_inframe_insertion	4	0.00167019
frameshift_variant&stop_gained&splice_region_variant	4	0.00167019
splice_donor_variant&splice_region_variant&intron_variant	3	0.00125265
disruptive_inframe_insertion&splice_region_variant	2	0.000835097
splice_acceptor_variant&splice_region_variant&intron_variant	2	0.000835097
stop_gained&disruptive_inframe_insertion	2	0.000835097
stop_lost&disruptive_inframe_deletion	2	0.000835097
frameshift_variant&splice_donor_variant&splice_region_variant&intron_variant	2	0.000835097
start_lost&conservative_inframe_insertion	1	0.000417549
non_coding_transcript_variant	1	0.000417549
Total	239493	100
