# Supplementary material for: Co-expression network and comparative transcriptome analysis for fiber initiation and elongation reveal genetic differences in two lines from upland cotton CCRI70 RIL population
Source: PeerJ. 2021 Jul 21;9:e11812. doi: 10.7717/peerj.11812 (PMC8308610; doi:10.7717/peerj.11812)
Supplement: Supplemental Information 10 [file peerj-09-11812-s010.xlsx]

## Sheet: Sheet1
Table S10: The profile lists by STEM analysis
Lines	L1							L2
profile	profile4	profile7	profile8	profile9	profile10	profile14	profile18	profile4	profile7	profile8	profile9	profile10	profile14	profile18
evalue	0.0	3e-62	2e-5	1e-49	2e-112	4e-70	5e-134	0.0	1e-13	7e-11	7e-138	0.0	3e-21	1e-81
genes list	Ghir_A01G000010	Ghir_A01G000330	Ghir_A01G001370	Ghir_A01G000300	Ghir_A01G000040	Ghir_A01G000030	Ghir_A01G000130	Ghir_A01G000010	Ghir_A01G000330	Ghir_A01G002520	Ghir_A01G000130	Ghir_A01G000040	Ghir_A01G001400	Ghir_A01G000230
	Ghir_A01G000020	Ghir_A01G000620	Ghir_A01G002080	Ghir_A01G000310	Ghir_A01G000540	Ghir_A01G000460	Ghir_A01G000230	Ghir_A01G000020	Ghir_A01G000940	Ghir_A01G004320	Ghir_A01G000300	Ghir_A01G000100	Ghir_A01G003570	Ghir_A01G000350
	Ghir_A01G000100	Ghir_A01G002300	Ghir_A01G004320	Ghir_A01G000400	Ghir_A01G000570	Ghir_A01G003160	Ghir_A01G000350	Ghir_A01G000540	Ghir_A01G001290	Ghir_A01G004690	Ghir_A01G000310	Ghir_A01G000730	Ghir_A01G005360	Ghir_A01G000490
	Ghir_A01G000680	Ghir_A01G002460	Ghir_A01G004840	Ghir_A01G000440	Ghir_A01G000730	Ghir_A01G003210	Ghir_A01G000490	Ghir_A01G000570	Ghir_A01G002460	Ghir_A01G009730	Ghir_A01G000400	Ghir_A01G000950	Ghir_A01G007090	Ghir_A01G000590
	Ghir_A01G000850	Ghir_A01G002780	Ghir_A01G005310	Ghir_A01G001230	Ghir_A01G000780	Ghir_A01G003570	Ghir_A01G000660	Ghir_A01G000680	Ghir_A01G002780	Ghir_A01G011030	Ghir_A01G000440	Ghir_A01G000960	Ghir_A01G007440	Ghir_A01G000620
	Ghir_A01G000930	Ghir_A01G002790	Ghir_A01G005410	Ghir_A01G002310	Ghir_A01G000970	Ghir_A01G003780	Ghir_A01G000810	Ghir_A01G000780	Ghir_A01G002840	Ghir_A01G012740	Ghir_A01G000660	Ghir_A01G000970	Ghir_A01G014340	Ghir_A01G000810
	Ghir_A01G000950	Ghir_A01G002840	Ghir_A01G005810	Ghir_A01G002340	Ghir_A01G001150	Ghir_A01G004630	Ghir_A01G000820	Ghir_A01G000850	Ghir_A01G002950	Ghir_A01G014090	Ghir_A01G000820	Ghir_A01G001140	Ghir_A01G014850	Ghir_A01G001190
	Ghir_A01G001140	Ghir_A01G002950	Ghir_A01G007120	Ghir_A01G003770	Ghir_A01G001210	Ghir_A01G004640	Ghir_A01G001600	Ghir_A01G000930	Ghir_A01G005680	Ghir_A01G015410	Ghir_A01G001130	Ghir_A01G002140	Ghir_A01G019500	Ghir_A01G001230
	Ghir_A01G001180	Ghir_A01G003050	Ghir_A01G009730	Ghir_A01G004680	Ghir_A01G002540	Ghir_A01G005650	Ghir_A01G001710	Ghir_A01G001150	Ghir_A01G005810	Ghir_A01G019350	Ghir_A01G001200	Ghir_A01G002290	Ghir_A01G020680	Ghir_A01G001600
	Ghir_A01G001190	Ghir_A01G003520	Ghir_A01G009750	Ghir_A01G005000	Ghir_A01G002920	Ghir_A01G005670	Ghir_A01G002450	Ghir_A01G001180	Ghir_A01G006910	Ghir_A01G020420	Ghir_A01G001370	Ghir_A01G002400	Ghir_A01G021240	Ghir_A01G001710
	Ghir_A01G001580	Ghir_A01G003850	Ghir_A01G010000	Ghir_A01G005690	Ghir_A01G004130	Ghir_A01G007090	Ghir_A01G002520	Ghir_A01G001210	Ghir_A01G009180	Ghir_A01G020430	Ghir_A01G002080	Ghir_A01G002490	Ghir_A01G021550	Ghir_A01G003850
	Ghir_A01G001950	Ghir_A01G004690	Ghir_A01G010700	Ghir_A01G007030	Ghir_A01G004180	Ghir_A01G008630	Ghir_A01G002620	Ghir_A01G001670	Ghir_A01G010160	Ghir_A01G022140	Ghir_A01G002110	Ghir_A01G002660	Ghir_A01G022740	Ghir_A01G005740
	Ghir_A01G002210	Ghir_A01G004900	Ghir_A01G011030	Ghir_A01G007460	Ghir_A01G004310	Ghir_A01G010080	Ghir_A01G003530	Ghir_A01G001700	Ghir_A01G010200	Ghir_A02G001610	Ghir_A01G002340	Ghir_A01G002890	Ghir_A02G000300	Ghir_A01G005860
	Ghir_A01G002270	Ghir_A01G005110	Ghir_A01G011150	Ghir_A01G008300	Ghir_A01G004470	Ghir_A01G011220	Ghir_A01G005770	Ghir_A01G001780	Ghir_A01G010250	Ghir_A02G002390	Ghir_A01G002450	Ghir_A01G003210	Ghir_A02G003720	Ghir_A01G007030
	Ghir_A01G002290	Ghir_A01G005680	Ghir_A01G011330	Ghir_A01G009130	Ghir_A01G004530	Ghir_A01G012800	Ghir_A01G006430	Ghir_A01G001950	Ghir_A01G010260	Ghir_A02G002550	Ghir_A01G002620	Ghir_A01G003250	Ghir_A02G010670	Ghir_A01G007450
	Ghir_A01G002390	Ghir_A01G005750	Ghir_A01G013370	Ghir_A01G009390	Ghir_A01G005960	Ghir_A01G012820	Ghir_A01G006970	Ghir_A01G001990	Ghir_A01G010420	Ghir_A02G003110	Ghir_A01G002790	Ghir_A01G003480	Ghir_A02G012470	Ghir_A01G007760
	Ghir_A01G002860	Ghir_A01G005850	Ghir_A01G014350	Ghir_A01G010060	Ghir_A01G006440	Ghir_A01G012940	Ghir_A01G007450	Ghir_A01G002210	Ghir_A01G010830	Ghir_A02G005380	Ghir_A01G003050	Ghir_A01G004310	Ghir_A02G013480	Ghir_A01G008950
	Ghir_A01G003030	Ghir_A01G005860	Ghir_A01G015170	Ghir_A01G010070	Ghir_A01G006860	Ghir_A01G013620	Ghir_A01G008100	Ghir_A01G002270	Ghir_A01G011320	Ghir_A02G006710	Ghir_A01G003520	Ghir_A01G004470	Ghir_A02G014310	Ghir_A01G009390
	Ghir_A01G003190	Ghir_A01G006260	Ghir_A01G020200	Ghir_A01G010140	Ghir_A01G007130	Ghir_A01G014020	Ghir_A01G008950	Ghir_A01G002390	Ghir_A01G011330	Ghir_A03G002030	Ghir_A01G003530	Ghir_A01G004630	Ghir_A02G014700	Ghir_A01G010360
	Ghir_A01G003250	Ghir_A01G007020	Ghir_A01G020740	Ghir_A01G010630	Ghir_A01G007640	Ghir_A01G014340	Ghir_A01G009460	Ghir_A01G002530	Ghir_A01G011410	Ghir_A03G002920	Ghir_A01G004840	Ghir_A01G005220	Ghir_A02G015240	Ghir_A01G010770
	Ghir_A01G003480	Ghir_A01G007320	Ghir_A01G022040	Ghir_A01G010660	Ghir_A01G007690	Ghir_A01G014490	Ghir_A01G010360	Ghir_A01G002540	Ghir_A01G011510	Ghir_A03G011360	Ghir_A01G004890	Ghir_A01G005300	Ghir_A02G015320	Ghir_A01G011630
	Ghir_A01G003650	Ghir_A01G007760	Ghir_A02G001340	Ghir_A01G012290	Ghir_A01G007830	Ghir_A01G014500	Ghir_A01G010830	Ghir_A01G002740	Ghir_A01G013270	Ghir_A03G011580	Ghir_A01G005410	Ghir_A01G005440	Ghir_A02G015330	Ghir_A01G011960
	Ghir_A01G003930	Ghir_A01G008230	Ghir_A02G003110	Ghir_A01G013270	Ghir_A01G008000	Ghir_A01G014850	Ghir_A01G011630	Ghir_A01G002860	Ghir_A01G013350	Ghir_A03G011660	Ghir_A01G005690	Ghir_A01G006410	Ghir_A02G016220	Ghir_A01G012520
	Ghir_A01G004050	Ghir_A01G009180	Ghir_A02G004040	Ghir_A01G015050	Ghir_A01G008320	Ghir_A01G015570	Ghir_A01G011960	Ghir_A01G002920	Ghir_A01G013550	Ghir_A03G014100	Ghir_A01G005750	Ghir_A01G006440	Ghir_A02G016450	Ghir_A01G012530
	Ghir_A01G004150	Ghir_A01G009790	Ghir_A02G005380	Ghir_A01G015660	Ghir_A01G009250	Ghir_A01G017330	Ghir_A01G012520	Ghir_A01G003030	Ghir_A01G014200	Ghir_A03G015980	Ghir_A01G006430	Ghir_A01G006450	Ghir_A02G017050	Ghir_A01G013050
	Ghir_A01G004290	Ghir_A01G010160	Ghir_A02G008930	Ghir_A01G015940	Ghir_A01G009990	Ghir_A01G017380	Ghir_A01G012530	Ghir_A01G003160	Ghir_A01G014370	Ghir_A03G018380	Ghir_A01G007020	Ghir_A01G006520	Ghir_A03G001700	Ghir_A01G013120
	Ghir_A01G004340	Ghir_A01G010250	Ghir_A02G008950	Ghir_A01G016320	Ghir_A01G010020	Ghir_A01G018670	Ghir_A01G012910	Ghir_A01G003190	Ghir_A01G015050	Ghir_A03G019220	Ghir_A01G007120	Ghir_A01G006720	Ghir_A03G004550	Ghir_A01G013790
	Ghir_A01G004440	Ghir_A01G010260	Ghir_A02G010490	Ghir_A01G017610	Ghir_A01G010130	Ghir_A01G020100	Ghir_A01G013790	Ghir_A01G003650	Ghir_A01G015710	Ghir_A03G020050	Ghir_A01G007320	Ghir_A01G007390	Ghir_A03G004880	Ghir_A01G013870
	Ghir_A01G004550	Ghir_A01G010420	Ghir_A02G011180	Ghir_A01G018400	Ghir_A01G011420	Ghir_A01G020660	Ghir_A01G014180	Ghir_A01G003900	Ghir_A01G017180	Ghir_A03G021300	Ghir_A01G008100	Ghir_A01G007520	Ghir_A03G005560	Ghir_A01G014180
	Ghir_A01G004560	Ghir_A01G010500	Ghir_A02G011470	Ghir_A01G019010	Ghir_A01G011680	Ghir_A01G020870	Ghir_A01G014290	Ghir_A01G004050	Ghir_A01G017660	Ghir_A04G000160	Ghir_A01G008300	Ghir_A01G007640	Ghir_A03G005630	Ghir_A01G014290
	Ghir_A01G004710	Ghir_A01G010770	Ghir_A02G015580	Ghir_A01G019070	Ghir_A01G011870	Ghir_A01G021240	Ghir_A01G014370	Ghir_A01G004130	Ghir_A01G018010	Ghir_A04G000650	Ghir_A01G009130	Ghir_A01G007770	Ghir_A03G005640	Ghir_A01G014460
	Ghir_A01G005200	Ghir_A01G011320	Ghir_A02G016050	Ghir_A01G019110	Ghir_A01G012480	Ghir_A01G021490	Ghir_A01G014790	Ghir_A01G004150	Ghir_A01G018060	Ghir_A04G002070	Ghir_A01G009750	Ghir_A01G007780	Ghir_A03G007640	Ghir_A01G014860
	Ghir_A01G005220	Ghir_A01G011410	Ghir_A02G016490	Ghir_A01G019850	Ghir_A01G013060	Ghir_A01G021690	Ghir_A01G015250	Ghir_A01G004180	Ghir_A01G018250	Ghir_A04G003900	Ghir_A01G009790	Ghir_A01G008150	Ghir_A03G008540	Ghir_A01G015460
	Ghir_A01G005270	Ghir_A01G012170	Ghir_A02G016520	Ghir_A01G020000	Ghir_A01G013410	Ghir_A01G022430	Ghir_A01G015460	Ghir_A01G004290	Ghir_A01G018830	Ghir_A04G005120	Ghir_A01G010140	Ghir_A01G008160	Ghir_A03G012890	Ghir_A01G015580
	Ghir_A01G005420	Ghir_A01G012890	Ghir_A02G018630	Ghir_A01G020070	Ghir_A01G013420	Ghir_A01G022580	Ghir_A01G015710	Ghir_A01G004340	Ghir_A01G019290	Ghir_A04G005240	Ghir_A01G010470	Ghir_A01G008320	Ghir_A03G014060	Ghir_A01G016010
	Ghir_A01G005510	Ghir_A01G013050	Ghir_A02G019420	Ghir_A01G020250	Ghir_A01G013510	Ghir_A02G001140	Ghir_A01G016010	Ghir_A01G004440	Ghir_A01G019560	Ghir_A04G009840	Ghir_A01G012170	Ghir_A01G008630	Ghir_A03G015790	Ghir_A01G016310
	Ghir_A01G005560	Ghir_A01G013870	Ghir_A03G000580	Ghir_A01G020840	Ghir_A01G013710	Ghir_A02G002140	Ghir_A01G016200	Ghir_A01G004530	Ghir_A01G019650	Ghir_A04G011310	Ghir_A01G012430	Ghir_A01G008680	Ghir_A03G018690	Ghir_A01G016320
	Ghir_A01G005580	Ghir_A01G014090	Ghir_A03G000650	Ghir_A01G020890	Ghir_A01G014930	Ghir_A02G003220	Ghir_A01G016310	Ghir_A01G004560	Ghir_A01G021190	Ghir_A04G011430	Ghir_A01G012860	Ghir_A01G009310	Ghir_A03G020060	Ghir_A01G017200
	Ghir_A01G006030	Ghir_A01G014200	Ghir_A03G002690	Ghir_A01G021310	Ghir_A01G015210	Ghir_A02G003750	Ghir_A01G016720	Ghir_A01G004640	Ghir_A01G022340	Ghir_A04G011860	Ghir_A01G012890	Ghir_A01G009540	Ghir_A03G020560	Ghir_A01G017610
	Ghir_A01G006170	Ghir_A01G014460	Ghir_A03G002850	Ghir_A01G022140	Ghir_A01G015310	Ghir_A02G006180	Ghir_A01G017200	Ghir_A01G004710	Ghir_A01G022490	Ghir_A04G014120	Ghir_A01G012910	Ghir_A01G009820	Ghir_A03G021390	Ghir_A01G017910
	Ghir_A01G006340	Ghir_A01G014860	Ghir_A03G003370	Ghir_A01G022380	Ghir_A01G015320	Ghir_A02G008900	Ghir_A01G017910	Ghir_A01G005120	Ghir_A01G022710	Ghir_A04G014370	Ghir_A01G014190	Ghir_A01G010020	Ghir_A03G022710	Ghir_A01G018260
	Ghir_A01G006410	Ghir_A01G015580	Ghir_A03G006960	Ghir_A01G022390	Ghir_A01G015650	Ghir_A02G009420	Ghir_A01G018260	Ghir_A01G005200	Ghir_A02G000670	Ghir_A05G001940	Ghir_A01G014350	Ghir_A01G010130	Ghir_A03G023430	Ghir_A01G018400
	Ghir_A01G006450	Ghir_A01G015630	Ghir_A03G008740	Ghir_A01G023060	Ghir_A01G016060	Ghir_A02G010430	Ghir_A01G018560	Ghir_A01G005270	Ghir_A02G001480	Ghir_A05G002850	Ghir_A01G014670	Ghir_A01G010720	Ghir_A04G002780	Ghir_A01G018870
	Ghir_A01G006470	Ghir_A01G017660	Ghir_A03G010460	Ghir_A02G000170	Ghir_A01G016160	Ghir_A02G010520	Ghir_A01G018750	Ghir_A01G005510	Ghir_A02G001500	Ghir_A05G003290	Ghir_A01G015250	Ghir_A01G010880	Ghir_A04G003690	Ghir_A01G019110
	Ghir_A01G006520	Ghir_A01G018010	Ghir_A03G017700	Ghir_A02G000620	Ghir_A01G016970	Ghir_A02G010600	Ghir_A01G018870	Ghir_A01G005560	Ghir_A02G001560	Ghir_A05G003450	Ghir_A01G015940	Ghir_A01G011220	Ghir_A04G006050	Ghir_A01G019210
	Ghir_A01G006650	Ghir_A01G018060	Ghir_A03G019220	Ghir_A02G001190	Ghir_A01G017500	Ghir_A02G010670	Ghir_A01G019060	Ghir_A01G005580	Ghir_A02G001570	Ghir_A05G003750	Ghir_A01G016200	Ghir_A01G011290	Ghir_A04G008260	Ghir_A01G020150
	Ghir_A01G006660	Ghir_A01G018480	Ghir_A03G019310	Ghir_A02G001440	Ghir_A01G018220	Ghir_A02G011030	Ghir_A01G019210	Ghir_A01G005650	Ghir_A02G003040	Ghir_A05G009760	Ghir_A01G017070	Ghir_A01G011420	Ghir_A04G008490	Ghir_A01G020490
	Ghir_A01G006920	Ghir_A01G018550	Ghir_A03G020050	Ghir_A02G001570	Ghir_A01G019000	Ghir_A02G012270	Ghir_A01G019380	Ghir_A01G005960	Ghir_A02G003170	Ghir_A05G014780	Ghir_A01G017220	Ghir_A01G011680	Ghir_A04G010900	Ghir_A01G020580
	Ghir_A01G007070	Ghir_A01G018830	Ghir_A03G021230	Ghir_A02G001640	Ghir_A01G019520	Ghir_A02G012470	Ghir_A01G019580	Ghir_A01G006030	Ghir_A02G003420	Ghir_A05G017130	Ghir_A01G018290	Ghir_A01G011870	Ghir_A04G013160	Ghir_A01G020820
	Ghir_A01G007150	Ghir_A01G019320	Ghir_A03G021490	Ghir_A02G001870	Ghir_A01G019840	Ghir_A02G012740	Ghir_A01G019940	Ghir_A01G006170	Ghir_A02G003440	Ghir_A05G021390	Ghir_A01G018480	Ghir_A01G012280	Ghir_A05G001010	Ghir_A01G020850
	Ghir_A01G007240	Ghir_A01G019470	Ghir_A03G022760	Ghir_A02G001910	Ghir_A01G019890	Ghir_A02G013380	Ghir_A01G020150	Ghir_A01G006340	Ghir_A02G003900	Ghir_A05G025210	Ghir_A01G018560	Ghir_A01G012940	Ghir_A05G001470	Ghir_A01G021040
	Ghir_A01G007300	Ghir_A01G019560	Ghir_A03G023520	Ghir_A02G003190	Ghir_A01G019900	Ghir_A02G014490	Ghir_A01G020490	Ghir_A01G006650	Ghir_A02G004790	Ghir_A05G025930	Ghir_A01G019060	Ghir_A01G012990	Ghir_A05G002300	Ghir_A01G021140
	Ghir_A01G007390	Ghir_A01G020530	Ghir_A04G000750	Ghir_A02G003240	Ghir_A01G021000	Ghir_A02G014700	Ghir_A01G020720	Ghir_A01G006660	Ghir_A02G005660	Ghir_A05G031140	Ghir_A01G019850	Ghir_A01G013410	Ghir_A05G002930	Ghir_A01G021380
	Ghir_A01G007490	Ghir_A01G020820	Ghir_A04G001350	Ghir_A02G003380	Ghir_A01G021210	Ghir_A02G015330	Ghir_A01G020760	Ghir_A01G006860	Ghir_A02G005770	Ghir_A05G032170	Ghir_A01G019940	Ghir_A01G013510	Ghir_A05G003630	Ghir_A01G021510
	Ghir_A01G007520	Ghir_A01G021190	Ghir_A04G002810	Ghir_A02G004890	Ghir_A01G021640	Ghir_A02G016200	Ghir_A01G020810	Ghir_A01G006920	Ghir_A02G006150	Ghir_A05G034570	Ghir_A01G020000	Ghir_A01G013590	Ghir_A05G005580	Ghir_A01G022250
	Ghir_A01G007550	Ghir_A01G021380	Ghir_A04G003900	Ghir_A02G005500	Ghir_A01G021650	Ghir_A02G016450	Ghir_A01G020830	Ghir_A01G007000	Ghir_A02G007010	Ghir_A05G035410	Ghir_A01G020070	Ghir_A01G013710	Ghir_A05G006080	Ghir_A01G022390
	Ghir_A01G007590	Ghir_A01G021510	Ghir_A04G004340	Ghir_A02G005770	Ghir_A01G022180	Ghir_A02G017500	Ghir_A01G020850	Ghir_A01G007070	Ghir_A02G008230	Ghir_A05G036390	Ghir_A01G020250	Ghir_A01G013920	Ghir_A05G007730	Ghir_A01G022420
	Ghir_A01G007650	Ghir_A01G022340	Ghir_A04G004700	Ghir_A02G006020	Ghir_A01G022310	Ghir_A02G017720	Ghir_A01G021140	Ghir_A01G007130	Ghir_A02G008320	Ghir_A05G037220	Ghir_A01G020760	Ghir_A01G014430	Ghir_A05G008720	Ghir_A01G022540
	Ghir_A01G007680	Ghir_A01G022490	Ghir_A04G005120	Ghir_A02G006410	Ghir_A01G022320	Ghir_A02G017780	Ghir_A01G021200	Ghir_A01G007150	Ghir_A02G008630	Ghir_A05G037290	Ghir_A01G020810	Ghir_A01G014490	Ghir_A05G013370	Ghir_A01G022720
	Ghir_A01G007730	Ghir_A01G022540	Ghir_A04G007160	Ghir_A02G006990	Ghir_A02G000300	Ghir_A02G018120	Ghir_A01G021620	Ghir_A01G007170	Ghir_A02G008730	Ghir_A05G038350	Ghir_A01G020830	Ghir_A01G014750	Ghir_A05G013930	Ghir_A02G000120
	Ghir_A01G007770	Ghir_A01G022720	Ghir_A04G010940	Ghir_A02G008500	Ghir_A02G000630	Ghir_A03G000190	Ghir_A01G022250	Ghir_A01G007300	Ghir_A02G008750	Ghir_A05G039000	Ghir_A01G020890	Ghir_A01G014770	Ghir_A05G015150	Ghir_A02G000280
	Ghir_A01G007780	Ghir_A02G000280	Ghir_A04G011860	Ghir_A02G008750	Ghir_A02G001130	Ghir_A03G004350	Ghir_A01G022420	Ghir_A01G007490	Ghir_A02G008950	Ghir_A06G001590	Ghir_A01G021310	Ghir_A01G014810	Ghir_A05G015410	Ghir_A02G000560
	Ghir_A01G007900	Ghir_A02G000670	Ghir_A04G012010	Ghir_A02G009010	Ghir_A02G002180	Ghir_A03G004880	Ghir_A01G022560	Ghir_A01G007550	Ghir_A02G009540	Ghir_A06G005010	Ghir_A01G022040	Ghir_A01G015210	Ghir_A05G017810	Ghir_A02G000960
	Ghir_A01G007960	Ghir_A02G001110	Ghir_A04G013260	Ghir_A02G009400	Ghir_A02G002220	Ghir_A03G005560	Ghir_A01G022680	Ghir_A01G007590	Ghir_A02G009890	Ghir_A06G005110	Ghir_A01G022560	Ghir_A01G015220	Ghir_A05G017930	Ghir_A02G001110
	Ghir_A01G007980	Ghir_A02G001480	Ghir_A04G014110	Ghir_A02G009540	Ghir_A02G002330	Ghir_A03G005860	Ghir_A02G000710	Ghir_A01G007610	Ghir_A02G011140	Ghir_A06G005780	Ghir_A01G022680	Ghir_A01G015260	Ghir_A05G018210	Ghir_A02G001190
	Ghir_A01G008080	Ghir_A02G001490	Ghir_A04G014120	Ghir_A02G009890	Ghir_A02G002910	Ghir_A03G006350	Ghir_A02G001520	Ghir_A01G007650	Ghir_A02G012100	Ghir_A06G007420	Ghir_A01G023060	Ghir_A01G015470	Ghir_A05G018860	Ghir_A02G001260
	Ghir_A01G008130	Ghir_A02G001740	Ghir_A04G014910	Ghir_A02G010030	Ghir_A02G003080	Ghir_A03G008140	Ghir_A02G001780	Ghir_A01G007680	Ghir_A02G012610	Ghir_A06G008540	Ghir_A02G000170	Ghir_A01G015930	Ghir_A05G028860	Ghir_A02G001640
	Ghir_A01G008160	Ghir_A02G002570	Ghir_A04G015420	Ghir_A02G010370	Ghir_A02G003410	Ghir_A03G008420	Ghir_A02G001790	Ghir_A01G007690	Ghir_A02G013940	Ghir_A06G010440	Ghir_A02G000620	Ghir_A01G016160	Ghir_A05G029890	Ghir_A02G001790
	Ghir_A01G008200	Ghir_A02G003040	Ghir_A05G000150	Ghir_A02G010480	Ghir_A02G003540	Ghir_A03G009210	Ghir_A02G001880	Ghir_A01G007730	Ghir_A02G015760	Ghir_A06G010770	Ghir_A02G000710	Ghir_A01G016180	Ghir_A05G030120	Ghir_A02G002070
	Ghir_A01G008220	Ghir_A02G003170	Ghir_A05G001440	Ghir_A02G010540	Ghir_A02G003770	Ghir_A03G011140	Ghir_A02G002410	Ghir_A01G007830	Ghir_A02G016190	Ghir_A06G012030	Ghir_A02G001340	Ghir_A01G016420	Ghir_A05G030960	Ghir_A02G002410
	Ghir_A01G008240	Ghir_A02G003390	Ghir_A05G004210	Ghir_A02G010630	Ghir_A02G004030	Ghir_A03G011220	Ghir_A02G002870	Ghir_A01G007900	Ghir_A02G016240	Ghir_A06G012300	Ghir_A02G001440	Ghir_A01G016820	Ghir_A05G035650	Ghir_A02G002570
	Ghir_A01G008390	Ghir_A02G003420	Ghir_A05G006510	Ghir_A02G011360	Ghir_A02G004200	Ghir_A03G013680	Ghir_A02G003180	Ghir_A01G007960	Ghir_A02G016650	Ghir_A06G012540	Ghir_A02G001490	Ghir_A01G016970	Ghir_A05G035720	Ghir_A02G003180
	Ghir_A01G008680	Ghir_A02G003440	Ghir_A05G007300	Ghir_A02G011650	Ghir_A02G004300	Ghir_A03G014720	Ghir_A02G003560	Ghir_A01G007980	Ghir_A02G016670	Ghir_A06G014980	Ghir_A02G001520	Ghir_A01G017250	Ghir_A05G036190	Ghir_A02G003240
	Ghir_A01G009100	Ghir_A02G003830	Ghir_A05G008030	Ghir_A02G011690	Ghir_A02G005950	Ghir_A03G015790	Ghir_A02G003890	Ghir_A01G008040	Ghir_A02G017210	Ghir_A06G014990	Ghir_A02G001780	Ghir_A01G018030	Ghir_A05G036260	Ghir_A02G003390
	Ghir_A01G009310	Ghir_A02G004120	Ghir_A05G009810	Ghir_A02G012630	Ghir_A02G006300	Ghir_A03G016360	Ghir_A02G003900	Ghir_A01G008080	Ghir_A02G017640	Ghir_A06G015350	Ghir_A02G001880	Ghir_A01G018040	Ghir_A06G006190	Ghir_A02G003560
	Ghir_A01G009490	Ghir_A02G004790	Ghir_A05G014390	Ghir_A02G012650	Ghir_A02G006370	Ghir_A03G016760	Ghir_A02G004240	Ghir_A01G008130	Ghir_A02G018090	Ghir_A06G015880	Ghir_A02G002360	Ghir_A01G018470	Ghir_A06G006740	Ghir_A02G003890
	Ghir_A01G009540	Ghir_A02G004800	Ghir_A05G015220	Ghir_A02G012660	Ghir_A02G006440	Ghir_A03G017190	Ghir_A02G004310	Ghir_A01G008170	Ghir_A02G018930	Ghir_A06G019430	Ghir_A02G002870	Ghir_A01G018640	Ghir_A06G007130	Ghir_A02G004310
	Ghir_A01G009900	Ghir_A02G005660	Ghir_A05G016310	Ghir_A02G014340	Ghir_A02G007190	Ghir_A03G018690	Ghir_A02G004990	Ghir_A01G008200	Ghir_A03G000180	Ghir_A06G019730	Ghir_A02G003190	Ghir_A01G018930	Ghir_A06G007250	Ghir_A02G005080
	Ghir_A01G009950	Ghir_A02G005860	Ghir_A05G017570	Ghir_A02G014650	Ghir_A02G007540	Ghir_A03G018850	Ghir_A02G005080	Ghir_A01G008240	Ghir_A03G000450	Ghir_A06G019810	Ghir_A02G003380	Ghir_A01G018950	Ghir_A06G009290	Ghir_A02G005340
	Ghir_A01G010090	Ghir_A02G006000	Ghir_A05G021030	Ghir_A02G015470	Ghir_A02G008090	Ghir_A03G020440	Ghir_A02G005210	Ghir_A01G008360	Ghir_A03G001600	Ghir_A06G020100	Ghir_A02G004040	Ghir_A01G019000	Ghir_A06G011950	Ghir_A02G006020
	Ghir_A01G010300	Ghir_A02G006010	Ghir_A05G021380	Ghir_A02G016480	Ghir_A02G008280	Ghir_A03G020560	Ghir_A02G005240	Ghir_A01G008390	Ghir_A03G001690	Ghir_A07G000050	Ghir_A02G004120	Ghir_A01G019140	Ghir_A06G017000	Ghir_A02G006410
	Ghir_A01G010310	Ghir_A02G006640	Ghir_A05G024530	Ghir_A02G016660	Ghir_A02G008640	Ghir_A03G020860	Ghir_A02G006860	Ghir_A01G009100	Ghir_A03G002330	Ghir_A07G007850	Ghir_A02G004990	Ghir_A01G019480	Ghir_A06G017750	Ghir_A02G006860
	Ghir_A01G010370	Ghir_A02G007010	Ghir_A05G025930	Ghir_A02G017110	Ghir_A02G008970	Ghir_A03G021160	Ghir_A02G007590	Ghir_A01G009490	Ghir_A03G002990	Ghir_A07G008050	Ghir_A02G005210	Ghir_A01G019520	Ghir_A06G020380	Ghir_A02G007590
	Ghir_A01G010380	Ghir_A02G007610	Ghir_A05G027430	Ghir_A02G018090	Ghir_A02G009740	Ghir_A03G021210	Ghir_A02G007600	Ghir_A01G009900	Ghir_A03G003150	Ghir_A07G010640	Ghir_A02G005240	Ghir_A01G019770	Ghir_A07G000020	Ghir_A02G007710
	Ghir_A01G010450	Ghir_A02G007860	Ghir_A05G027470	Ghir_A02G018840	Ghir_A02G012780	Ghir_A03G021720	Ghir_A02G007660	Ghir_A01G009950	Ghir_A03G003280	Ghir_A07G011400	Ghir_A02G005860	Ghir_A01G019890	Ghir_A07G000890	Ghir_A02G007860
	Ghir_A01G010600	Ghir_A02G008230	Ghir_A05G030290	Ghir_A02G019150	Ghir_A02G013080	Ghir_A03G022470	Ghir_A02G007710	Ghir_A01G010080	Ghir_A03G003330	Ghir_A07G012480	Ghir_A02G006010	Ghir_A01G020090	Ghir_A07G001340	Ghir_A02G008260
	Ghir_A01G010670	Ghir_A02G008630	Ghir_A05G030950	Ghir_A03G001920	Ghir_A02G013480	Ghir_A04G000330	Ghir_A02G007940	Ghir_A01G010090	Ghir_A03G004010	Ghir_A07G013400	Ghir_A02G006640	Ghir_A01G020100	Ghir_A07G003980	Ghir_A02G009000
	Ghir_A01G010720	Ghir_A02G008730	Ghir_A05G031670	Ghir_A03G002880	Ghir_A02G013620	Ghir_A04G003250	Ghir_A02G009310	Ghir_A01G010300	Ghir_A03G004180	Ghir_A07G014910	Ghir_A02G006990	Ghir_A01G020330	Ghir_A07G004440	Ghir_A02G009600
	Ghir_A01G011290	Ghir_A02G009000	Ghir_A05G033820	Ghir_A03G002980	Ghir_A02G014070	Ghir_A04G003270	Ghir_A02G009600	Ghir_A01G010310	Ghir_A03G005590	Ghir_A07G015780	Ghir_A02G007600	Ghir_A01G020450	Ghir_A07G006910	Ghir_A02G009880
	Ghir_A01G011370	Ghir_A02G009240	Ghir_A05G034620	Ghir_A03G004180	Ghir_A02G014100	Ghir_A04G003510	Ghir_A02G009880	Ghir_A01G010370	Ghir_A03G005710	Ghir_A07G016950	Ghir_A02G007660	Ghir_A01G020520	Ghir_A07G007940	Ghir_A02G010480
	Ghir_A01G011540	Ghir_A02G010270	Ghir_A05G039820	Ghir_A03G004590	Ghir_A02G015010	Ghir_A04G005620	Ghir_A02G010950	Ghir_A01G010380	Ghir_A03G005990	Ghir_A07G017000	Ghir_A02G008500	Ghir_A01G020660	Ghir_A07G009000	Ghir_A02G010490
	Ghir_A01G011560	Ghir_A02G011260	Ghir_A05G041120	Ghir_A03G004710	Ghir_A02G015130	Ghir_A04G005790	Ghir_A02G012950	Ghir_A01G010600	Ghir_A03G006270	Ghir_A07G018460	Ghir_A02G008930	Ghir_A01G021070	Ghir_A07G011420	Ghir_A02G010630
	Ghir_A01G011610	Ghir_A02G012100	Ghir_A06G003700	Ghir_A03G004890	Ghir_A02G015190	Ghir_A04G005870	Ghir_A02G013050	Ghir_A01G010670	Ghir_A03G006430	Ghir_A07G018730	Ghir_A02G009010	Ghir_A01G021220	Ghir_A07G012830	Ghir_A02G010950
	Ghir_A01G011640	Ghir_A02G012610	Ghir_A06G005410	Ghir_A03G005030	Ghir_A02G015240	Ghir_A04G006620	Ghir_A02G013410	Ghir_A01G010990	Ghir_A03G006960	Ghir_A07G021710	Ghir_A02G009240	Ghir_A01G021430	Ghir_A07G015510	Ghir_A02G011260
	Ghir_A01G011660	Ghir_A02G013330	Ghir_A06G007730	Ghir_A03G005110	Ghir_A02G015560	Ghir_A04G008120	Ghir_A02G013510	Ghir_A01G011160	Ghir_A03G007480	Ghir_A07G024150	Ghir_A02G009250	Ghir_A01G021560	Ghir_A07G016600	Ghir_A02G012950
	Ghir_A01G011710	Ghir_A02G013940	Ghir_A06G007790	Ghir_A03G005410	Ghir_A02G015850	Ghir_A04G008560	Ghir_A02G013970	Ghir_A01G011370	Ghir_A03G007650	Ghir_A08G000870	Ghir_A02G009310	Ghir_A01G021580	Ghir_A07G019070	Ghir_A02G013410
	Ghir_A01G011850	Ghir_A02G014800	Ghir_A06G007810	Ghir_A03G007170	Ghir_A02G016220	Ghir_A04G008690	Ghir_A02G014010	Ghir_A01G011560	Ghir_A03G008370	Ghir_A08G001190	Ghir_A02G009370	Ghir_A01G021640	Ghir_A07G019980	Ghir_A02G013510
	Ghir_A01G011860	Ghir_A02G014820	Ghir_A06G009360	Ghir_A03G008130	Ghir_A02G016230	Ghir_A04G008710	Ghir_A02G014180	Ghir_A01G011660	Ghir_A03G009040	Ghir_A08G003330	Ghir_A02G009400	Ghir_A01G021670	Ghir_A07G023310	Ghir_A02G013970
	Ghir_A01G011900	Ghir_A02G014950	Ghir_A06G010410	Ghir_A03G008870	Ghir_A02G017050	Ghir_A04G009160	Ghir_A02G014320	Ghir_A01G011710	Ghir_A03G009110	Ghir_A08G004500	Ghir_A02G009510	Ghir_A01G021680	Ghir_A07G024700	Ghir_A02G014180
	Ghir_A01G012000	Ghir_A02G014980	Ghir_A06G010770	Ghir_A03G009830	Ghir_A02G017270	Ghir_A04G010510	Ghir_A02G015310	Ghir_A01G011850	Ghir_A03G010030	Ghir_A08G005130	Ghir_A02G010030	Ghir_A01G022100	Ghir_A08G001420	Ghir_A02G014820
	Ghir_A01G012260	Ghir_A02G015640	Ghir_A06G011430	Ghir_A03G009920	Ghir_A02G017280	Ghir_A04G010800	Ghir_A02G016010	Ghir_A01G011860	Ghir_A03G012140	Ghir_A08G006110	Ghir_A02G010370	Ghir_A01G022180	Ghir_A08G002200	Ghir_A02G014950
	Ghir_A01G012580	Ghir_A02G016000	Ghir_A06G015260	Ghir_A03G010240	Ghir_A02G017630	Ghir_A04G011620	Ghir_A02G016270	Ghir_A01G012000	Ghir_A03G012560	Ghir_A08G007960	Ghir_A02G010540	Ghir_A01G022320	Ghir_A08G005620	Ghir_A02G014980
	Ghir_A01G012600	Ghir_A02G016240	Ghir_A06G016080	Ghir_A03G011290	Ghir_A02G018190	Ghir_A04G012070	Ghir_A02G016340	Ghir_A01G012010	Ghir_A03G013380	Ghir_A08G008130	Ghir_A02G010890	Ghir_A01G022430	Ghir_A08G008120	Ghir_A02G015530
	Ghir_A01G012660	Ghir_A02G016670	Ghir_A06G016940	Ghir_A03G011340	Ghir_A02G018260	Ghir_A04G012370	Ghir_A02G016620	Ghir_A01G012260	Ghir_A03G013530	Ghir_A08G012700	Ghir_A02G011180	Ghir_A02G000630	Ghir_A08G008200	Ghir_A02G015640
	Ghir_A01G012690	Ghir_A02G016840	Ghir_A06G018820	Ghir_A03G011740	Ghir_A02G018850	Ghir_A04G013010	Ghir_A02G017040	Ghir_A01G012580	Ghir_A03G013760	Ghir_A08G013780	Ghir_A02G011470	Ghir_A02G000810	Ghir_A08G008310	Ghir_A02G016010
	Ghir_A01G012840	Ghir_A02G017030	Ghir_A06G019140	Ghir_A03G012800	Ghir_A02G019260	Ghir_A04G013220	Ghir_A02G017120	Ghir_A01G012600	Ghir_A03G014180	Ghir_A08G016860	Ghir_A02G011650	Ghir_A02G000900	Ghir_A08G010030	Ghir_A02G016270
	Ghir_A01G013250	Ghir_A02G017130	Ghir_A06G019770	Ghir_A03G013480	Ghir_A02G019380	Ghir_A04G013540	Ghir_A02G017960	Ghir_A01G012660	Ghir_A03G014440	Ghir_A08G017640	Ghir_A02G011690	Ghir_A02G001130	Ghir_A08G011060	Ghir_A02G016620
	Ghir_A01G013590	Ghir_A02G017210	Ghir_A06G020380	Ghir_A03G013900	Ghir_A02G019640	Ghir_A05G000830	Ghir_A02G018030	Ghir_A01G012690	Ghir_A03G015930	Ghir_A08G019640	Ghir_A02G012630	Ghir_A02G001140	Ghir_A08G011130	Ghir_A02G017130
	Ghir_A01G013660	Ghir_A02G017640	Ghir_A06G020850	Ghir_A03G013950	Ghir_A02G019690	Ghir_A05G001470	Ghir_A02G018290	Ghir_A01G012800	Ghir_A03G016880	Ghir_A08G020080	Ghir_A02G012650	Ghir_A02G001390	Ghir_A08G012580	Ghir_A02G018490
	Ghir_A01G013730	Ghir_A02G018430	Ghir_A06G020880	Ghir_A03G014480	Ghir_A02G019710	Ghir_A05G001520	Ghir_A02G018490	Ghir_A01G012820	Ghir_A03G017040	Ghir_A08G020660	Ghir_A02G012660	Ghir_A02G001470	Ghir_A08G014780	Ghir_A02G018560
	Ghir_A01G013770	Ghir_A02G018770	Ghir_A06G022640	Ghir_A03G016790	Ghir_A03G000090	Ghir_A05G002300	Ghir_A02G018560	Ghir_A01G012840	Ghir_A03G017490	Ghir_A08G020810	Ghir_A02G013050	Ghir_A02G001820	Ghir_A08G014820	Ghir_A02G018760
	Ghir_A01G013920	Ghir_A02G019030	Ghir_A07G005920	Ghir_A03G017020	Ghir_A03G000300	Ghir_A05G002940	Ghir_A02G019000	Ghir_A01G013020	Ghir_A03G017570	Ghir_A08G021180	Ghir_A02G014010	Ghir_A02G001830	Ghir_A08G015180	Ghir_A02G019010
	Ghir_A01G014110	Ghir_A02G019680	Ghir_A07G006600	Ghir_A03G017660	Ghir_A03G000500	Ghir_A05G003910	Ghir_A02G019010	Ghir_A01G013250	Ghir_A03G017660	Ghir_A08G022370	Ghir_A02G014340	Ghir_A02G002220	Ghir_A08G016380	Ghir_A02G019030
	Ghir_A01G014190	Ghir_A03G001690	Ghir_A07G008980	Ghir_A03G018630	Ghir_A03G001160	Ghir_A05G005440	Ghir_A02G019310	Ghir_A01G013320	Ghir_A03G018910	Ghir_A08G024090	Ghir_A02G014650	Ghir_A02G002710	Ghir_A08G016390	Ghir_A02G019680
	Ghir_A01G014430	Ghir_A03G001960	Ghir_A07G010540	Ghir_A03G019010	Ghir_A03G001760	Ghir_A05G005580	Ghir_A03G000020	Ghir_A01G013420	Ghir_A03G019470	Ghir_A09G005100	Ghir_A02G014800	Ghir_A02G002760	Ghir_A08G017710	Ghir_A03G000420
	Ghir_A01G014640	Ghir_A03G002360	Ghir_A07G010640	Ghir_A03G021600	Ghir_A03G002180	Ghir_A05G006380	Ghir_A03G000180	Ghir_A01G013660	Ghir_A03G019940	Ghir_A09G005120	Ghir_A02G015580	Ghir_A02G002910	Ghir_A08G018200	Ghir_A03G000590
	Ghir_A01G014730	Ghir_A03G002990	Ghir_A07G012480	Ghir_A03G021700	Ghir_A03G002430	Ghir_A05G006990	Ghir_A03G000310	Ghir_A01G013730	Ghir_A03G020620	Ghir_A09G010230	Ghir_A02G016050	Ghir_A02G003080	Ghir_A08G018990	Ghir_A03G000650
	Ghir_A01G014750	Ghir_A03G003150	Ghir_A07G013200	Ghir_A03G022050	Ghir_A03G003350	Ghir_A05G007030	Ghir_A03G000400	Ghir_A01G013750	Ghir_A03G022250	Ghir_A09G015440	Ghir_A02G016480	Ghir_A02G003160	Ghir_A08G019800	Ghir_A03G000840
	Ghir_A01G014770	Ghir_A03G003170	Ghir_A07G013280	Ghir_A03G022060	Ghir_A03G003630	Ghir_A05G007360	Ghir_A03G000420	Ghir_A01G013760	Ghir_A03G022670	Ghir_A09G016230	Ghir_A02G016840	Ghir_A02G003410	Ghir_A08G021270	Ghir_A03G001080
	Ghir_A01G014880	Ghir_A03G003230	Ghir_A07G014110	Ghir_A03G022670	Ghir_A03G003680	Ghir_A05G007970	Ghir_A03G000590	Ghir_A01G013770	Ghir_A03G022850	Ghir_A09G018340	Ghir_A02G017040	Ghir_A02G003540	Ghir_A08G023160	Ghir_A03G002220
	Ghir_A01G014940	Ghir_A03G003280	Ghir_A07G016340	Ghir_A03G023270	Ghir_A03G003940	Ghir_A05G008410	Ghir_A03G000840	Ghir_A01G014020	Ghir_A03G023070	Ghir_A09G018370	Ghir_A02G017110	Ghir_A02G003600	Ghir_A08G024660	Ghir_A03G002360
	Ghir_A01G015150	Ghir_A03G003300	Ghir_A07G018860	Ghir_A03G023910	Ghir_A03G004940	Ghir_A05G008880	Ghir_A03G001000	Ghir_A01G014110	Ghir_A03G023450	Ghir_A09G019060	Ghir_A02G017960	Ghir_A02G003630	Ghir_A08G025320	Ghir_A03G002980
	Ghir_A01G015220	Ghir_A03G003330	Ghir_A07G021010	Ghir_A04G000180	Ghir_A03G005060	Ghir_A05G009970	Ghir_A03G001080	Ghir_A01G014640	Ghir_A03G023850	Ghir_A09G019230	Ghir_A02G018030	Ghir_A02G003750	Ghir_A08G025530	Ghir_A03G003550
	Ghir_A01G015470	Ghir_A03G003500	Ghir_A07G021710	Ghir_A04G000470	Ghir_A03G005070	Ghir_A05G010520	Ghir_A03G001840	Ghir_A01G014730	Ghir_A04G000270	Ghir_A09G020590	Ghir_A02G018290	Ghir_A02G003770	Ghir_A09G001310	Ghir_A03G003730
	Ghir_A01G015560	Ghir_A03G003550	Ghir_A07G022540	Ghir_A04G001120	Ghir_A03G005250	Ghir_A05G011920	Ghir_A03G002220	Ghir_A01G014910	Ghir_A04G000470	Ghir_A09G020810	Ghir_A02G018630	Ghir_A02G004300	Ghir_A09G002690	Ghir_A03G004130
	Ghir_A01G015810	Ghir_A03G004830	Ghir_A08G001780	Ghir_A04G001420	Ghir_A03G005470	Ghir_A05G012080	Ghir_A03G002780	Ghir_A01G014940	Ghir_A04G001410	Ghir_A09G021940	Ghir_A02G018770	Ghir_A02G004360	Ghir_A09G006720	Ghir_A03G004270
	Ghir_A01G015910	Ghir_A03G005590	Ghir_A08G004720	Ghir_A04G002990	Ghir_A03G005480	Ghir_A05G013180	Ghir_A03G002890	Ghir_A01G015150	Ghir_A04G001420	Ghir_A09G022350	Ghir_A02G019000	Ghir_A02G004880	Ghir_A09G011690	Ghir_A03G004590
	Ghir_A01G015970	Ghir_A03G005780	Ghir_A08G006270	Ghir_A04G004150	Ghir_A03G005630	Ghir_A05G013370	Ghir_A03G003670	Ghir_A01G015310	Ghir_A04G001850	Ghir_A09G022590	Ghir_A02G019310	Ghir_A02G005120	Ghir_A09G014550	Ghir_A03G004650
	Ghir_A01G015980	Ghir_A03G005990	Ghir_A08G008720	Ghir_A04G004210	Ghir_A03G006200	Ghir_A05G013420	Ghir_A03G003730	Ghir_A01G015560	Ghir_A04G004970	Ghir_A09G024870	Ghir_A02G019420	Ghir_A02G005130	Ghir_A09G015460	Ghir_A03G004820
	Ghir_A01G016000	Ghir_A03G006270	Ghir_A08G009620	Ghir_A04G004280	Ghir_A03G007110	Ghir_A05G013570	Ghir_A03G004270	Ghir_A01G015830	Ghir_A04G005390	Ghir_A09G025840	Ghir_A03G000020	Ghir_A02G005690	Ghir_A09G016580	Ghir_A03G004830
	Ghir_A01G016120	Ghir_A03G006280	Ghir_A08G014160	Ghir_A04G006200	Ghir_A03G007880	Ghir_A05G014330	Ghir_A03G004440	Ghir_A01G015910	Ghir_A04G007620	Ghir_A10G002730	Ghir_A03G000310	Ghir_A02G005740	Ghir_A09G017800	Ghir_A03G005780
	Ghir_A01G016140	Ghir_A03G006430	Ghir_A08G014310	Ghir_A04G007190	Ghir_A03G008360	Ghir_A05G014480	Ghir_A03G004650	Ghir_A01G015970	Ghir_A04G008680	Ghir_A10G004870	Ghir_A03G000400	Ghir_A02G006120	Ghir_A09G018520	Ghir_A03G006600
	Ghir_A01G016280	Ghir_A03G007570	Ghir_A08G015030	Ghir_A04G007590	Ghir_A03G008560	Ghir_A05G015410	Ghir_A03G004820	Ghir_A01G015980	Ghir_A04G009830	Ghir_A10G005300	Ghir_A03G000580	Ghir_A02G006180	Ghir_A10G002170	Ghir_A03G007430
	Ghir_A01G016350	Ghir_A03G007650	Ghir_A08G015330	Ghir_A04G008010	Ghir_A03G008780	Ghir_A05G015670	Ghir_A03G004920	Ghir_A01G016060	Ghir_A04G010110	Ghir_A10G010920	Ghir_A03G001190	Ghir_A02G006300	Ghir_A10G005900	Ghir_A03G007910
	Ghir_A01G016820	Ghir_A03G007950	Ghir_A08G015660	Ghir_A04G008450	Ghir_A03G009840	Ghir_A05G017530	Ghir_A03G005140	Ghir_A01G016120	Ghir_A04G010270	Ghir_A10G017630	Ghir_A03G001560	Ghir_A02G006590	Ghir_A10G006580	Ghir_A03G008810
	Ghir_A01G016900	Ghir_A03G008370	Ghir_A08G015970	Ghir_A04G008620	Ghir_A03G009940	Ghir_A05G017720	Ghir_A03G005740	Ghir_A01G016140	Ghir_A04G011150	Ghir_A10G019270	Ghir_A03G001840	Ghir_A02G006660	Ghir_A10G007280	Ghir_A03G008890
	Ghir_A01G016910	Ghir_A03G009040	Ghir_A08G016810	Ghir_A04G008780	Ghir_A03G012230	Ghir_A05G017970	Ghir_A03G006600	Ghir_A01G016350	Ghir_A04G012250	Ghir_A10G019520	Ghir_A03G002690	Ghir_A02G006760	Ghir_A10G007890	Ghir_A03G008910
	Ghir_A01G016950	Ghir_A03G009110	Ghir_A08G017010	Ghir_A04G008790	Ghir_A03G013060	Ghir_A05G017980	Ghir_A03G007160	Ghir_A01G016900	Ghir_A04G012730	Ghir_A10G021270	Ghir_A03G002780	Ghir_A02G006970	Ghir_A10G008580	Ghir_A03G009160
	Ghir_A01G017130	Ghir_A03G009160	Ghir_A08G017640	Ghir_A04G009270	Ghir_A03G013440	Ghir_A05G018210	Ghir_A03G007430	Ghir_A01G016950	Ghir_A04G012800	Ghir_A10G022140	Ghir_A03G002890	Ghir_A02G007190	Ghir_A10G013100	Ghir_A03G009300
	Ghir_A01G017250	Ghir_A03G009810	Ghir_A08G020160	Ghir_A04G009480	Ghir_A03G013450	Ghir_A05G018590	Ghir_A03G007480	Ghir_A01G017130	Ghir_A04G012870	Ghir_A10G024180	Ghir_A03G003300	Ghir_A02G007200	Ghir_A10G013330	Ghir_A03G009750
	Ghir_A01G017600	Ghir_A03G010030	Ghir_A08G020660	Ghir_A04G009840	Ghir_A03G013700	Ghir_A05G020350	Ghir_A03G007980	Ghir_A01G017330	Ghir_A04G013400	Ghir_A11G001850	Ghir_A03G003370	Ghir_A02G007230	Ghir_A10G015290	Ghir_A03G009770
	Ghir_A01G017690	Ghir_A03G011820	Ghir_A08G025290	Ghir_A04G010240	Ghir_A03G013980	Ghir_A05G020470	Ghir_A03G008840	Ghir_A01G017380	Ghir_A04G013620	Ghir_A11G002050	Ghir_A03G003500	Ghir_A02G008110	Ghir_A10G015680	Ghir_A03G009810
	Ghir_A01G018030	Ghir_A03G012560	Ghir_A09G000120	Ghir_A04G010410	Ghir_A03G015370	Ghir_A05G021330	Ghir_A03G008890	Ghir_A01G017600	Ghir_A04G015160	Ghir_A11G005700	Ghir_A03G003670	Ghir_A02G008280	Ghir_A10G016240	Ghir_A03G009930
	Ghir_A01G018040	Ghir_A03G013530	Ghir_A09G002210	Ghir_A04G010710	Ghir_A03G015920	Ghir_A05G021900	Ghir_A03G008910	Ghir_A01G017690	Ghir_A04G015500	Ghir_A11G007880	Ghir_A03G004710	Ghir_A02G008300	Ghir_A10G017240	Ghir_A03G010190
	Ghir_A01G018200	Ghir_A03G013760	Ghir_A09G006060	Ghir_A04G010980	Ghir_A03G017280	Ghir_A05G022090	Ghir_A03G009300	Ghir_A01G018050	Ghir_A05G001300	Ghir_A11G008140	Ghir_A03G004890	Ghir_A02G008970	Ghir_A10G018270	Ghir_A03G010510
	Ghir_A01G018470	Ghir_A03G014100	Ghir_A09G008330	Ghir_A04G011240	Ghir_A03G019630	Ghir_A05G022980	Ghir_A03G009930	Ghir_A01G018200	Ghir_A05G001320	Ghir_A11G008160	Ghir_A03G004920	Ghir_A02G009030	Ghir_A10G020120	Ghir_A03G010660
	Ghir_A01G018490	Ghir_A03G014180	Ghir_A09G008520	Ghir_A04G011430	Ghir_A03G019860	Ghir_A05G023690	Ghir_A03G010480	Ghir_A01G018210	Ghir_A05G001610	Ghir_A11G009660	Ghir_A03G005030	Ghir_A02G009100	Ghir_A10G021060	Ghir_A03G010810
	Ghir_A01G018610	Ghir_A03G014440	Ghir_A09G009900	Ghir_A04G012740	Ghir_A03G019980	Ghir_A05G024580	Ghir_A03G010510	Ghir_A01G018240	Ghir_A05G001690	Ghir_A11G011970	Ghir_A03G005110	Ghir_A02G009230	Ghir_A10G022610	Ghir_A03G010970
	Ghir_A01G018640	Ghir_A03G016600	Ghir_A09G010050	Ghir_A04G013420	Ghir_A03G020150	Ghir_A05G025090	Ghir_A03G010670	Ghir_A01G018490	Ghir_A05G001980	Ghir_A11G014670	Ghir_A03G005140	Ghir_A02G009420	Ghir_A11G000850	Ghir_A03G012120
	Ghir_A01G018660	Ghir_A03G016880	Ghir_A09G010230	Ghir_A04G013860	Ghir_A03G020820	Ghir_A05G026230	Ghir_A03G010810	Ghir_A01G018610	Ghir_A05G002780	Ghir_A11G015200	Ghir_A03G005740	Ghir_A02G009450	Ghir_A11G004900	Ghir_A03G012460
	Ghir_A01G018930	Ghir_A03G017040	Ghir_A09G010930	Ghir_A04G014370	Ghir_A03G020940	Ghir_A05G026630	Ghir_A03G010890	Ghir_A01G018660	Ghir_A05G002790	Ghir_A11G020990	Ghir_A03G006280	Ghir_A02G009470	Ghir_A11G004940	Ghir_A03G012710
	Ghir_A01G018950	Ghir_A03G017410	Ghir_A09G011670	Ghir_A04G014480	Ghir_A03G020950	Ghir_A05G028240	Ghir_A03G010930	Ghir_A01G018670	Ghir_A05G003260	Ghir_A11G022030	Ghir_A03G007160	Ghir_A02G009700	Ghir_A11G008960	Ghir_A03G013470
	Ghir_A01G019020	Ghir_A03G017490	Ghir_A09G011810	Ghir_A04G014830	Ghir_A03G021030	Ghir_A05G028860	Ghir_A03G010970	Ghir_A01G019020	Ghir_A05G004640	Ghir_A11G024480	Ghir_A03G007170	Ghir_A02G009720	Ghir_A11G009060	Ghir_A03G013480
	Ghir_A01G019140	Ghir_A03G017570	Ghir_A09G013530	Ghir_A05G000870	Ghir_A03G021170	Ghir_A05G029890	Ghir_A03G011050	Ghir_A01G019260	Ghir_A05G005830	Ghir_A11G033590	Ghir_A03G007950	Ghir_A02G009740	Ghir_A11G009940	Ghir_A03G013950
	Ghir_A01G019260	Ghir_A03G017890	Ghir_A09G018380	Ghir_A05G000960	Ghir_A03G021380	Ghir_A05G034080	Ghir_A03G011260	Ghir_A01G019530	Ghir_A05G006420	Ghir_A12G001030	Ghir_A03G008130	Ghir_A02G009960	Ghir_A11G012160	Ghir_A03G014320
	Ghir_A01G019480	Ghir_A03G017990	Ghir_A09G018680	Ghir_A05G001020	Ghir_A03G022370	Ghir_A05G036140	Ghir_A03G011390	Ghir_A01G019630	Ghir_A05G006540	Ghir_A12G002120	Ghir_A03G008740	Ghir_A02G010010	Ghir_A11G012680	Ghir_A03G014430
	Ghir_A01G019530	Ghir_A03G018100	Ghir_A09G020340	Ghir_A05G002170	Ghir_A03G022450	Ghir_A05G037740	Ghir_A03G012460	Ghir_A01G019830	Ghir_A05G007020	Ghir_A12G003350	Ghir_A03G008840	Ghir_A02G010260	Ghir_A11G014010	Ghir_A03G014880
	Ghir_A01G019630	Ghir_A03G018510	Ghir_A09G020570	Ghir_A05G003030	Ghir_A03G023090	Ghir_A05G039110	Ghir_A03G012710	Ghir_A01G019840	Ghir_A05G008020	Ghir_A12G007980	Ghir_A03G008870	Ghir_A02G010420	Ghir_A11G015190	Ghir_A03G014960
	Ghir_A01G019770	Ghir_A03G018910	Ghir_A09G020810	Ghir_A05G003130	Ghir_A03G023690	Ghir_A05G039220	Ghir_A03G012750	Ghir_A01G019900	Ghir_A05G008890	Ghir_A12G010910	Ghir_A03G009830	Ghir_A02G010600	Ghir_A11G017290	Ghir_A03G015440
	Ghir_A01G019830	Ghir_A03G019600	Ghir_A09G022130	Ghir_A05G003530	Ghir_A04G000130	Ghir_A05G040360	Ghir_A03G013220	Ghir_A01G019910	Ghir_A05G009130	Ghir_A12G011940	Ghir_A03G009920	Ghir_A02G010990	Ghir_A11G018810	Ghir_A03G015450
	Ghir_A01G019910	Ghir_A03G019620	Ghir_A09G022390	Ghir_A05G003750	Ghir_A04G000220	Ghir_A05G040500	Ghir_A03G013470	Ghir_A01G020130	Ghir_A05G009360	Ghir_A12G017430	Ghir_A03G010240	Ghir_A02G011390	Ghir_A11G019620	Ghir_A03G016310
	Ghir_A01G020130	Ghir_A03G020010	Ghir_A09G023830	Ghir_A05G004680	Ghir_A04G000360	Ghir_A05G041480	Ghir_A03G013970	Ghir_A01G020240	Ghir_A05G009470	Ghir_A12G018830	Ghir_A03G010480	Ghir_A02G011860	Ghir_A11G020930	Ghir_A03G017890
	Ghir_A01G020330	Ghir_A03G020240	Ghir_A09G024610	Ghir_A05G004980	Ghir_A04G000580	Ghir_A05G042030	Ghir_A03G014190	Ghir_A01G020350	Ghir_A05G010240	Ghir_A12G020720	Ghir_A03G010890	Ghir_A02G012000	Ghir_A11G021070	Ghir_A03G017990
	Ghir_A01G020350	Ghir_A03G020290	Ghir_A09G024870	Ghir_A05G005120	Ghir_A04G000690	Ghir_A06G000220	Ghir_A03G014230	Ghir_A01G020370	Ghir_A05G010560	Ghir_A12G020960	Ghir_A03G010930	Ghir_A02G012200	Ghir_A11G021130	Ghir_A03G020290
	Ghir_A01G020450	Ghir_A03G022030	Ghir_A09G025270	Ghir_A05G005890	Ghir_A04G002030	Ghir_A06G001010	Ghir_A03G014320	Ghir_A01G020460	Ghir_A05G011730	Ghir_A12G024590	Ghir_A03G011050	Ghir_A02G012490	Ghir_A11G026230	Ghir_A03G021230
	Ghir_A01G020520	Ghir_A03G022230	Ghir_A09G025910	Ghir_A05G006270	Ghir_A04G003010	Ghir_A06G003910	Ghir_A03G014880	Ghir_A01G020540	Ghir_A05G013090	Ghir_A12G026060	Ghir_A03G011340	Ghir_A02G012540	Ghir_A11G027410	Ghir_A03G021770
	Ghir_A01G020540	Ghir_A03G022700	Ghir_A10G001320	Ghir_A05G006580	Ghir_A04G004400	Ghir_A06G005250	Ghir_A03G015440	Ghir_A01G020900	Ghir_A05G013670	Ghir_A13G000480	Ghir_A03G011390	Ghir_A02G012560	Ghir_A11G032340	Ghir_A03G022060
	Ghir_A01G020900	Ghir_A03G023070	Ghir_A10G002420	Ghir_A05G007160	Ghir_A04G004530	Ghir_A06G006190	Ghir_A03G016310	Ghir_A01G020910	Ghir_A05G013850	Ghir_A13G000610	Ghir_A03G011740	Ghir_A02G012880	Ghir_A11G034100	Ghir_A03G022230
	Ghir_A01G020910	Ghir_A03G023180	Ghir_A10G004710	Ghir_A05G008480	Ghir_A04G005100	Ghir_A06G006740	Ghir_A03G018770	Ghir_A01G020920	Ghir_A05G013980	Ghir_A13G001080	Ghir_A03G012800	Ghir_A02G013080	Ghir_A11G034110	Ghir_A03G022320
	Ghir_A01G021070	Ghir_A03G023360	Ghir_A10G005230	Ghir_A05G008510	Ghir_A04G005690	Ghir_A06G007100	Ghir_A03G020170	Ghir_A01G021030	Ghir_A05G013990	Ghir_A13G001610	Ghir_A03G013080	Ghir_A02G013270	Ghir_A12G000880	Ghir_A03G023270
	Ghir_A01G021220	Ghir_A03G023390	Ghir_A10G005300	Ghir_A05G008710	Ghir_A04G006000	Ghir_A06G007250	Ghir_A03G020880	Ghir_A01G021230	Ghir_A05G015030	Ghir_A13G003670	Ghir_A03G013220	Ghir_A02G013570	Ghir_A12G001360	Ghir_A03G023360
	Ghir_A01G021230	Ghir_A03G023450	Ghir_A10G005470	Ghir_A05G008890	Ghir_A04G006130	Ghir_A06G009540	Ghir_A03G021010	Ghir_A01G021400	Ghir_A05G015610	Ghir_A13G003730	Ghir_A03G013900	Ghir_A02G013990	Ghir_A12G009550	Ghir_A03G023460
	Ghir_A01G021400	Ghir_A04G000540	Ghir_A10G005540	Ghir_A05G009760	Ghir_A04G006840	Ghir_A06G009620	Ghir_A03G021300	Ghir_A01G021570	Ghir_A05G016180	Ghir_A13G005620	Ghir_A03G014190	Ghir_A02G014070	Ghir_A12G010710	Ghir_A04G000180
	Ghir_A01G021430	Ghir_A04G001100	Ghir_A10G006540	Ghir_A05G010130	Ghir_A04G006990	Ghir_A06G011950	Ghir_A03G021770	Ghir_A01G021650	Ghir_A05G016320	Ghir_A13G005960	Ghir_A03G014480	Ghir_A02G014160	Ghir_A12G013560	Ghir_A04G000540
	Ghir_A01G021560	Ghir_A04G001410	Ghir_A10G007660	Ghir_A05G010280	Ghir_A04G007030	Ghir_A06G013200	Ghir_A03G021800	Ghir_A01G021690	Ghir_A05G017680	Ghir_A13G006500	Ghir_A03G014620	Ghir_A02G014290	Ghir_A12G013810	Ghir_A04G001050
	Ghir_A01G021670	Ghir_A04G001670	Ghir_A10G007820	Ghir_A05G010340	Ghir_A04G007560	Ghir_A06G013540	Ghir_A03G022100	Ghir_A01G021790	Ghir_A05G017830	Ghir_A13G006720	Ghir_A03G016540	Ghir_A02G014330	Ghir_A12G015110	Ghir_A04G001100
	Ghir_A01G021680	Ghir_A04G001850	Ghir_A10G009860	Ghir_A05G010700	Ghir_A04G007960	Ghir_A06G013750	Ghir_A03G022160	Ghir_A01G021930	Ghir_A05G018560	Ghir_A13G008040	Ghir_A03G016790	Ghir_A02G014740	Ghir_A12G015830	Ghir_A04G001670
	Ghir_A01G021790	Ghir_A04G002000	Ghir_A10G012840	Ghir_A05G011770	Ghir_A04G008070	Ghir_A06G013770	Ghir_A03G022320	Ghir_A01G021960	Ghir_A05G018570	Ghir_A13G009780	Ghir_A03G018770	Ghir_A02G014990	Ghir_A12G016700	Ghir_A04G001840
	Ghir_A01G021930	Ghir_A04G002060	Ghir_A10G013670	Ghir_A05G012070	Ghir_A04G008250	Ghir_A06G016030	Ghir_A03G023410	Ghir_A01G021990	Ghir_A05G018840	Ghir_A13G015110	Ghir_A03G019310	Ghir_A02G015130	Ghir_A12G018320	Ghir_A04G003030
	Ghir_A01G021960	Ghir_A04G004930	Ghir_A10G014290	Ghir_A05G012190	Ghir_A04G008530	Ghir_A06G017000	Ghir_A04G000160	Ghir_A01G022010	Ghir_A05G019560	Ghir_A13G015560	Ghir_A03G019340	Ghir_A02G015190	Ghir_A12G019150	Ghir_A04G003230
	Ghir_A01G021990	Ghir_A04G004940	Ghir_A10G018170	Ghir_A05G013190	Ghir_A04G008590	Ghir_A06G017130	Ghir_A04G000950	Ghir_A01G022150	Ghir_A05G019780	Ghir_A13G016450	Ghir_A03G020170	Ghir_A02G015440	Ghir_A12G021610	Ghir_A04G003240
	Ghir_A01G022150	Ghir_A04G004970	Ghir_A10G020060	Ghir_A05G013350	Ghir_A04G009100	Ghir_A06G017710	Ghir_A04G001050	Ghir_A01G022270	Ghir_A05G020370	Ghir_A13G017030	Ghir_A03G020240	Ghir_A02G015560	Ghir_A12G023500	Ghir_A04G003340
	Ghir_A01G022270	Ghir_A04G005390	Ghir_A10G022720	Ghir_A05G013920	Ghir_A04G009250	Ghir_A06G020180	Ghir_A04G001840	Ghir_A01G022310	Ghir_A05G020660	Ghir_A13G018630	Ghir_A03G020880	Ghir_A02G015610	Ghir_A12G023610	Ghir_A04G003770
	Ghir_A01G022350	Ghir_A04G007620	Ghir_A10G023890	Ghir_A05G014090	Ghir_A04G009510	Ghir_A06G020330	Ghir_A04G002450	Ghir_A01G022350	Ghir_A05G020670	Ghir_A13G019600	Ghir_A03G021660	Ghir_A02G015670	Ghir_A12G028010	Ghir_A04G004000
	Ghir_A01G022660	Ghir_A04G007790	Ghir_A11G000850	Ghir_A05G014780	Ghir_A04G009680	Ghir_A06G021080	Ghir_A04G002660	Ghir_A01G022580	Ghir_A05G021380	Ghir_A13G019640	Ghir_A03G021700	Ghir_A02G015930	Ghir_A13G002460	Ghir_A04G004030
	Ghir_A01G022690	Ghir_A04G008220	Ghir_A11G001890	Ghir_A05G015030	Ghir_A04G010810	Ghir_A06G022290	Ghir_A04G003030	Ghir_A01G022660	Ghir_A05G021610	Ghir_A13G020230	Ghir_A03G021800	Ghir_A02G016170	Ghir_A13G002890	Ghir_A04G005510
	Ghir_A01G022840	Ghir_A04G008340	Ghir_A11G005700	Ghir_A05G015400	Ghir_A04G010950	Ghir_A07G000020	Ghir_A04G004030	Ghir_A01G022690	Ghir_A05G021760	Ghir_A13G020520	Ghir_A03G022030	Ghir_A02G016230	Ghir_A13G003000	Ghir_A04G005530
	Ghir_A01G022950	Ghir_A04G008800	Ghir_A11G006440	Ghir_A05G016520	Ghir_A04G011250	Ghir_A07G002020	Ghir_A04G004430	Ghir_A01G022840	Ghir_A05G021960	Ghir_A13G020800	Ghir_A03G022050	Ghir_A02G016250	Ghir_A13G005970	Ghir_A04G006410
	Ghir_A01G022990	Ghir_A04G008910	Ghir_A11G007880	Ghir_A05G016740	Ghir_A04G011500	Ghir_A07G002480	Ghir_A04G005240	Ghir_A01G022850	Ghir_A05G021970	Ghir_A13G021240	Ghir_A03G022100	Ghir_A02G016290	Ghir_A13G007710	Ghir_A04G008740
	Ghir_A01G023010	Ghir_A04G008960	Ghir_A11G008030	Ghir_A05G017870	Ghir_A04G011650	Ghir_A07G003560	Ghir_A04G005500	Ghir_A01G022950	Ghir_A05G022710	Ghir_A13G021940	Ghir_A03G022160	Ghir_A02G016300	Ghir_A13G007970	Ghir_A04G008780
	Ghir_A02G000020	Ghir_A04G009280	Ghir_A11G008180	Ghir_A05G018850	Ghir_A04G011790	Ghir_A07G003630	Ghir_A04G005510	Ghir_A01G023010	Ghir_A05G022790	Ghir_A13G023820	Ghir_A03G023510	Ghir_A02G016410	Ghir_A13G009030	Ghir_A04G008800
	Ghir_A02G000030	Ghir_A04G009830	Ghir_A11G010030	Ghir_A05G019310	Ghir_A04G013070	Ghir_A07G003810	Ghir_A04G005530	Ghir_A01G023100	Ghir_A05G024100	Ghir_A13G024080	Ghir_A03G023800	Ghir_A02G016500	Ghir_A13G009060	Ghir_A04G008910
	Ghir_A02G000050	Ghir_A04G010110	Ghir_A11G011970	Ghir_A05G019450	Ghir_A04G013550	Ghir_A07G006230	Ghir_A04G006100	Ghir_A02G000020	Ghir_A05G024210	Ghir_A13G024450	Ghir_A03G023910	Ghir_A02G016960	Ghir_A13G012400	Ghir_A04G009280
	Ghir_A02G000230	Ghir_A04G010270	Ghir_A11G013130	Ghir_A05G019630	Ghir_A04G014360	Ghir_A07G007380	Ghir_A04G006410	Ghir_A02G000030	Ghir_A05G026610	Ghir_A13G024630	Ghir_A04G000950	Ghir_A02G017280	Ghir_A13G014230	Ghir_A04G009480
	Ghir_A02G000290	Ghir_A04G010580	Ghir_A11G014190	Ghir_A05G021610	Ghir_A04G014490	Ghir_A07G007940	Ghir_A04G006790	Ghir_A02G000050	Ghir_A05G027470	Ghir_D01G002320	Ghir_A04G000970	Ghir_A02G017500	Ghir_A13G015170	Ghir_A04G009580
	Ghir_A02G000310	Ghir_A04G011150	Ghir_A11G015790	Ghir_A05G021960	Ghir_A04G014580	Ghir_A07G010080	Ghir_A04G008680	Ghir_A02G000230	Ghir_A05G028400	Ghir_D01G003650	Ghir_A04G001120	Ghir_A02G017610	Ghir_A13G015250	Ghir_A04G010580
	Ghir_A02G000460	Ghir_A04G011340	Ghir_A11G016670	Ghir_A05G022370	Ghir_A04G016330	Ghir_A07G011030	Ghir_A04G008740	Ghir_A02G000240	Ghir_A05G030930	Ghir_D01G008890	Ghir_A04G002450	Ghir_A02G017720	Ghir_A13G015570	Ghir_A04G012650
	Ghir_A02G000810	Ghir_A04G012250	Ghir_A11G019510	Ghir_A05G023130	Ghir_A05G000230	Ghir_A07G011420	Ghir_A04G009090	Ghir_A02G000290	Ghir_A05G031170	Ghir_D01G009400	Ghir_A04G002660	Ghir_A02G017830	Ghir_A13G016610	Ghir_A04G012740
	Ghir_A02G000820	Ghir_A04G012730	Ghir_A11G020990	Ghir_A05G024050	Ghir_A05G000800	Ghir_A07G013060	Ghir_A04G009580	Ghir_A02G000310	Ghir_A05G033030	Ghir_D01G010150	Ghir_A04G004210	Ghir_A02G018040	Ghir_D01G002120	Ghir_A04G013080
	Ghir_A02G000880	Ghir_A04G012800	Ghir_A11G022230	Ghir_A05G024150	Ghir_A05G000880	Ghir_A07G013690	Ghir_A04G009850	Ghir_A02G000460	Ghir_A05G033410	Ghir_D01G012390	Ghir_A04G004930	Ghir_A02G018240	Ghir_D01G002310	Ghir_A04G014100
	Ghir_A02G000900	Ghir_A04G012870	Ghir_A11G026520	Ghir_A05G024210	Ghir_A05G001030	Ghir_A07G014040	Ghir_A04G010030	Ghir_A02G000790	Ghir_A05G034620	Ghir_D01G013140	Ghir_A04G004940	Ghir_A02G018250	Ghir_D01G004170	Ghir_A04G015460
	Ghir_A02G001200	Ghir_A04G013400	Ghir_A11G033590	Ghir_A05G025070	Ghir_A05G001530	Ghir_A07G014730	Ghir_A04G010830	Ghir_A02G000820	Ghir_A05G035480	Ghir_D01G013630	Ghir_A04G005140	Ghir_A02G018260	Ghir_D01G008180	Ghir_A04G015700
	Ghir_A02G001290	Ghir_A04G013620	Ghir_A11G035990	Ghir_A05G027150	Ghir_A05G001740	Ghir_A07G014750	Ghir_A04G011160	Ghir_A02G000880	Ghir_A05G035630	Ghir_D01G015140	Ghir_A04G005500	Ghir_A02G018270	Ghir_D01G009760	Ghir_A04G016140
	Ghir_A02G001330	Ghir_A04G014100	Ghir_A12G000740	Ghir_A05G027750	Ghir_A05G002330	Ghir_A07G014810	Ghir_A04G011600	Ghir_A02G001200	Ghir_A05G035740	Ghir_D01G017830	Ghir_A04G006100	Ghir_A02G018500	Ghir_D01G010420	Ghir_A05G000070
	Ghir_A02G001350	Ghir_A04G015700	Ghir_A12G002120	Ghir_A05G028380	Ghir_A05G002960	Ghir_A07G016140	Ghir_A04G011720	Ghir_A02G001290	Ghir_A05G036230	Ghir_D01G020590	Ghir_A04G006200	Ghir_A02G018800	Ghir_D01G015300	Ghir_A05G000490
	Ghir_A02G001390	Ghir_A05G000600	Ghir_A12G003350	Ghir_A05G029290	Ghir_A05G003280	Ghir_A07G018110	Ghir_A04G012040	Ghir_A02G001330	Ghir_A05G036480	Ghir_D01G021230	Ghir_A04G007160	Ghir_A02G018940	Ghir_D01G015420	Ghir_A05G000590
	Ghir_A02G001400	Ghir_A05G000650	Ghir_A12G003550	Ghir_A05G029560	Ghir_A05G003560	Ghir_A07G019070	Ghir_A04G012650	Ghir_A02G001350	Ghir_A05G037080	Ghir_D01G021940	Ghir_A04G007190	Ghir_A02G018960	Ghir_D01G016420	Ghir_A05G000600
	Ghir_A02G001470	Ghir_A05G001300	Ghir_A12G004640	Ghir_A05G029610	Ghir_A05G004050	Ghir_A07G019200	Ghir_A04G012680	Ghir_A02G001400	Ghir_A05G037450	Ghir_D01G023960	Ghir_A04G007590	Ghir_A02G019050	Ghir_D01G018870	Ghir_A05G000650
	Ghir_A02G001620	Ghir_A05G001320	Ghir_A12G004850	Ghir_A05G030370	Ghir_A05G004460	Ghir_A07G021080	Ghir_A04G013450	Ghir_A02G001620	Ghir_A05G038730	Ghir_D02G002100	Ghir_A04G007790	Ghir_A02G019100	Ghir_D01G018890	Ghir_A05G000730
	Ghir_A02G001670	Ghir_A05G001610	Ghir_A12G006040	Ghir_A05G030380	Ghir_A05G004510	Ghir_A07G021300	Ghir_A04G013480	Ghir_A02G001670	Ghir_A05G038910	Ghir_D02G004430	Ghir_A04G007880	Ghir_A02G019250	Ghir_D01G020980	Ghir_A05G000960
	Ghir_A02G001770	Ghir_A05G001690	Ghir_A12G008100	Ghir_A05G030930	Ghir_A05G005080	Ghir_A07G021410	Ghir_A04G014560	Ghir_A02G002130	Ghir_A05G038990	Ghir_D02G005860	Ghir_A04G007940	Ghir_A02G019380	Ghir_D01G021690	Ghir_A05G001020
	Ghir_A02G001820	Ghir_A05G001980	Ghir_A12G010910	Ghir_A05G031170	Ghir_A05G005460	Ghir_A07G022020	Ghir_A04G015450	Ghir_A02G002140	Ghir_A05G040510	Ghir_D02G006250	Ghir_A04G008010	Ghir_A02G019710	Ghir_D01G022910	Ghir_A05G001990
	Ghir_A02G002130	Ghir_A05G002780	Ghir_A12G011540	Ghir_A05G031360	Ghir_A05G005510	Ghir_A07G022520	Ghir_A04G015460	Ghir_A02G002180	Ghir_A05G040580	Ghir_D02G008200	Ghir_A04G008220	Ghir_A03G000300	Ghir_D02G003700	Ghir_A05G002430
	Ghir_A02G002530	Ghir_A05G002900	Ghir_A12G011960	Ghir_A05G032540	Ghir_A05G005790	Ghir_A07G024180	Ghir_A05G000070	Ghir_A02G002210	Ghir_A05G040940	Ghir_D02G008350	Ghir_A04G008310	Ghir_A03G000600	Ghir_D02G004210	Ghir_A05G002770
	Ghir_A02G002650	Ghir_A05G002950	Ghir_A12G013150	Ghir_A05G033260	Ghir_A05G005870	Ghir_A07G024220	Ghir_A05G000100	Ghir_A02G002330	Ghir_A05G041340	Ghir_D02G011810	Ghir_A04G008450	Ghir_A03G001400	Ghir_D02G004870	Ghir_A05G002810
	Ghir_A02G002720	Ghir_A05G003100	Ghir_A12G014000	Ghir_A05G033790	Ghir_A05G006080	Ghir_A07G024700	Ghir_A05G000730	Ghir_A02G002530	Ghir_A05G041590	Ghir_D02G012900	Ghir_A04G008620	Ghir_A03G001960	Ghir_D02G006400	Ghir_A05G002890
	Ghir_A02G002730	Ghir_A05G003260	Ghir_A12G014990	Ghir_A05G033930	Ghir_A05G006560	Ghir_A07G025280	Ghir_A05G000810	Ghir_A02G002650	Ghir_A05G042200	Ghir_D02G019850	Ghir_A04G008790	Ghir_A03G002120	Ghir_D02G008910	Ghir_A05G002900
	Ghir_A02G002760	Ghir_A05G003480	Ghir_A12G015630	Ghir_A05G034170	Ghir_A05G007220	Ghir_A08G000390	Ghir_A05G001630	Ghir_A02G002720	Ghir_A05G042650	Ghir_D02G020580	Ghir_A04G009090	Ghir_A03G002180	Ghir_D02G010240	Ghir_A05G002950
	Ghir_A02G002810	Ghir_A05G003500	Ghir_A12G016500	Ghir_A05G034570	Ghir_A05G008360	Ghir_A08G000910	Ghir_A05G001990	Ghir_A02G002730	Ghir_A05G043410	Ghir_D02G021390	Ghir_A04G009270	Ghir_A03G002310	Ghir_D02G012250	Ghir_A05G003620
	Ghir_A02G002900	Ghir_A05G003610	Ghir_A12G016540	Ghir_A05G034700	Ghir_A05G008800	Ghir_A08G005530	Ghir_A05G002260	Ghir_A02G002810	Ghir_A06G000120	Ghir_D02G022560	Ghir_A04G009850	Ghir_A03G002480	Ghir_D02G012620	Ghir_A05G004670
	Ghir_A02G003020	Ghir_A05G003620	Ghir_A12G016640	Ghir_A05G034950	Ghir_A05G008990	Ghir_A08G005620	Ghir_A05G002430	Ghir_A02G002900	Ghir_A06G000210	Ghir_D02G022750	Ghir_A04G010030	Ghir_A03G003210	Ghir_D02G015420	Ghir_A05G004680
	Ghir_A02G003160	Ghir_A05G004160	Ghir_A12G018650	Ghir_A05G035300	Ghir_A05G009730	Ghir_A08G007000	Ghir_A05G002480	Ghir_A02G003020	Ghir_A06G001700	Ghir_D02G023020	Ghir_A04G010710	Ghir_A03G003350	Ghir_D02G016510	Ghir_A05G004980
	Ghir_A02G003490	Ghir_A05G004730	Ghir_A12G019140	Ghir_A05G035720	Ghir_A05G009960	Ghir_A08G007160	Ghir_A05G002490	Ghir_A02G003220	Ghir_A06G001790	Ghir_D03G000220	Ghir_A04G010980	Ghir_A03G003520	Ghir_D02G019930	Ghir_A05G005290
	Ghir_A02G003600	Ghir_A05G005490	Ghir_A12G019360	Ghir_A05G036360	Ghir_A05G010040	Ghir_A08G008200	Ghir_A05G002770	Ghir_A02G003490	Ghir_A06G002430	Ghir_D03G003230	Ghir_A04G011300	Ghir_A03G003630	Ghir_D02G021460	Ghir_A05G006350
	Ghir_A02G003720	Ghir_A05G005650	Ghir_A12G021190	Ghir_A05G036550	Ghir_A05G010230	Ghir_A08G010160	Ghir_A05G002790	Ghir_A02G004030	Ghir_A06G002790	Ghir_D03G008710	Ghir_A04G011720	Ghir_A03G003680	Ghir_D03G000120	Ghir_A05G006810
	Ghir_A02G004060	Ghir_A05G005720	Ghir_A12G021800	Ghir_A05G037050	Ghir_A05G010900	Ghir_A08G010250	Ghir_A05G002890	Ghir_A02G004100	Ghir_A06G002880	Ghir_D03G010260	Ghir_A04G011840	Ghir_A03G003780	Ghir_D03G001890	Ghir_A05G007300
	Ghir_A02G004100	Ghir_A05G005830	Ghir_A12G022130	Ghir_A05G037220	Ghir_A05G011830	Ghir_A08G011130	Ghir_A05G004650	Ghir_A02G004130	Ghir_A06G003290	Ghir_D03G010670	Ghir_A04G011970	Ghir_A03G004030	Ghir_D03G004460	Ghir_A05G007930
	Ghir_A02G004130	Ghir_A05G005880	Ghir_A12G023160	Ghir_A05G037290	Ghir_A05G011910	Ghir_A08G011530	Ghir_A05G004670	Ghir_A02G004150	Ghir_A06G003350	Ghir_D03G011050	Ghir_A04G012010	Ghir_A03G004350	Ghir_D03G004960	Ghir_A05G009050
	Ghir_A02G004150	Ghir_A05G006180	Ghir_A12G025700	Ghir_A05G037960	Ghir_A05G012180	Ghir_A08G011710	Ghir_A05G004790	Ghir_A02G004200	Ghir_A06G004110	Ghir_D03G011710	Ghir_A04G012040	Ghir_A03G004620	Ghir_D03G006980	Ghir_A05G009140
	Ghir_A02G004330	Ghir_A05G006330	Ghir_A13G000900	Ghir_A05G038240	Ghir_A05G013450	Ghir_A08G012490	Ghir_A05G006420	Ghir_A02G004350	Ghir_A06G004130	Ghir_D03G013080	Ghir_A04G012060	Ghir_A03G004940	Ghir_D03G008890	Ghir_A05G009370
	Ghir_A02G004350	Ghir_A05G006370	Ghir_A13G002130	Ghir_A05G038340	Ghir_A05G015310	Ghir_A08G012820	Ghir_A05G006910	Ghir_A02G004560	Ghir_A06G004170	Ghir_D03G014640	Ghir_A04G012390	Ghir_A03G005060	Ghir_D03G010200	Ghir_A05G009790
	Ghir_A02G004360	Ghir_A05G006540	Ghir_A13G003240	Ghir_A05G039370	Ghir_A05G017180	Ghir_A08G014780	Ghir_A05G007280	Ghir_A02G004590	Ghir_A06G005040	Ghir_D03G014830	Ghir_A04G012590	Ghir_A03G005070	Ghir_D03G011030	Ghir_A05G009900
	Ghir_A02G004560	Ghir_A05G007020	Ghir_A13G003670	Ghir_A05G040150	Ghir_A05G017780	Ghir_A08G014820	Ghir_A05G007930	Ghir_A02G004700	Ghir_A06G007240	Ghir_D03G015270	Ghir_A04G012680	Ghir_A03G005380	Ghir_D03G013740	Ghir_A05G010080
	Ghir_A02G004590	Ghir_A05G008020	Ghir_A13G004630	Ghir_A05G040660	Ghir_A05G017850	Ghir_A08G016250	Ghir_A05G008390	Ghir_A02G004720	Ghir_A06G007300	Ghir_D03G016150	Ghir_A04G013260	Ghir_A03G005400	Ghir_D03G013770	Ghir_A05G011380
	Ghir_A02G004650	Ghir_A05G009130	Ghir_A13G005960	Ghir_A05G041580	Ghir_A05G019490	Ghir_A08G019430	Ghir_A05G009050	Ghir_A02G005000	Ghir_A06G007790	Ghir_D04G000970	Ghir_A04G013420	Ghir_A03G005420	Ghir_D03G014350	Ghir_A05G012100
	Ghir_A02G004700	Ghir_A05G009360	Ghir_A13G006720	Ghir_A05G041610	Ghir_A05G019800	Ghir_A08G020630	Ghir_A05G009140	Ghir_A02G005350	Ghir_A06G008860	Ghir_D04G001150	Ghir_A04G013450	Ghir_A03G005470	Ghir_D03G016720	Ghir_A05G012630
	Ghir_A02G004720	Ghir_A05G009370	Ghir_A13G006850	Ghir_A05G042170	Ghir_A05G019820	Ghir_A08G021210	Ghir_A05G009290	Ghir_A02G005430	Ghir_A06G009480	Ghir_D04G001370	Ghir_A04G013480	Ghir_A03G005550	Ghir_D04G003840	Ghir_A05G012900
	Ghir_A02G004880	Ghir_A05G009470	Ghir_A13G006900	Ghir_A05G042200	Ghir_A05G021280	Ghir_A08G025120	Ghir_A05G010460	Ghir_A02G005460	Ghir_A06G010290	Ghir_D04G006680	Ghir_A04G013660	Ghir_A03G005860	Ghir_D04G004650	Ghir_A05G013220
	Ghir_A02G005000	Ghir_A05G009900	Ghir_A13G007450	Ghir_A06G000670	Ghir_A05G022260	Ghir_A08G025710	Ghir_A05G010490	Ghir_A02G005570	Ghir_A06G011170	Ghir_D04G007760	Ghir_A04G013830	Ghir_A03G006020	Ghir_D04G006920	Ghir_A05G013300
	Ghir_A02G005120	Ghir_A05G010560	Ghir_A13G007980	Ghir_A06G000980	Ghir_A05G022300	Ghir_A08G025880	Ghir_A05G011400	Ghir_A02G005620	Ghir_A06G011500	Ghir_D04G014970	Ghir_A04G013860	Ghir_A03G006120	Ghir_D04G007200	Ghir_A05G013360
	Ghir_A02G005130	Ghir_A05G011380	Ghir_A13G009300	Ghir_A06G001150	Ghir_A05G022450	Ghir_A08G026590	Ghir_A05G011650	Ghir_A02G005810	Ghir_A06G011540	Ghir_D04G017780	Ghir_A04G014480	Ghir_A03G006200	Ghir_D04G012540	Ghir_A05G014000
	Ghir_A02G005350	Ghir_A05G011730	Ghir_A13G013490	Ghir_A06G001420	Ghir_A05G022470	Ghir_A09G001660	Ghir_A05G012900	Ghir_A02G005960	Ghir_A06G012740	Ghir_D04G018530	Ghir_A04G014560	Ghir_A03G006350	Ghir_D04G020140	Ghir_A05G014440
	Ghir_A02G005430	Ghir_A05G012100	Ghir_A13G014860	Ghir_A06G001960	Ghir_A05G022560	Ghir_A09G002690	Ghir_A05G013220	Ghir_A02G006060	Ghir_A06G013390	Ghir_D04G019810	Ghir_A04G014830	Ghir_A03G006370	Ghir_D05G000920	Ghir_A05G014630
	Ghir_A02G005460	Ghir_A05G012160	Ghir_A13G016550	Ghir_A06G002300	Ghir_A05G022960	Ghir_A09G003240	Ghir_A05G013360	Ghir_A02G006370	Ghir_A06G013480	Ghir_D05G001320	Ghir_A04G014860	Ghir_A03G006400	Ghir_D05G002860	Ghir_A05G014990
	Ghir_A02G005570	Ghir_A05G012260	Ghir_A13G018780	Ghir_A06G003070	Ghir_A05G023380	Ghir_A09G004290	Ghir_A05G013400	Ghir_A02G006440	Ghir_A06G015960	Ghir_D05G002250	Ghir_A04G015420	Ghir_A03G006470	Ghir_D05G003140	Ghir_A05G015190
	Ghir_A02G005620	Ghir_A05G012630	Ghir_A13G018960	Ghir_A06G003290	Ghir_A05G023940	Ghir_A09G007360	Ghir_A05G014990	Ghir_A02G007050	Ghir_A06G016130	Ghir_D05G006880	Ghir_A04G015450	Ghir_A03G007110	Ghir_D05G004560	Ghir_A05G016440
	Ghir_A02G005740	Ghir_A05G013090	Ghir_A13G021940	Ghir_A06G005140	Ghir_A05G025640	Ghir_A09G008780	Ghir_A05G015070	Ghir_A02G007060	Ghir_A06G016470	Ghir_D05G007690	Ghir_A04G015590	Ghir_A03G007360	Ghir_D05G005810	Ghir_A05G016520
	Ghir_A02G005810	Ghir_A05G013670	Ghir_A13G022970	Ghir_A06G005780	Ghir_A05G026700	Ghir_A09G009310	Ghir_A05G015560	Ghir_A02G007150	Ghir_A06G017180	Ghir_D05G011620	Ghir_A05G000100	Ghir_A03G007580	Ghir_D05G006110	Ghir_A05G017020
	Ghir_A02G005840	Ghir_A05G013990	Ghir_A13G023960	Ghir_A06G005820	Ghir_A05G026800	Ghir_A09G009540	Ghir_A05G016440	Ghir_A02G007180	Ghir_A06G018310	Ghir_D05G013650	Ghir_A05G000810	Ghir_A03G007840	Ghir_D05G006140	Ghir_A05G017040
	Ghir_A02G005960	Ghir_A05G014030	Ghir_A13G024080	Ghir_A06G006700	Ghir_A05G027330	Ghir_A09G010150	Ghir_A05G016660	Ghir_A02G007460	Ghir_A06G019060	Ghir_D05G015250	Ghir_A05G000870	Ghir_A03G008310	Ghir_D05G006640	Ghir_A05G018850
	Ghir_A02G005990	Ghir_A05G014440	Ghir_D01G000870	Ghir_A06G006890	Ghir_A05G027850	Ghir_A09G010870	Ghir_A05G017020	Ghir_A02G007480	Ghir_A06G021150	Ghir_D05G020620	Ghir_A05G001430	Ghir_A03G008360	Ghir_D05G008420	Ghir_A05G019020
	Ghir_A02G006060	Ghir_A05G014630	Ghir_D01G001660	Ghir_A06G007060	Ghir_A05G028560	Ghir_A09G012190	Ghir_A05G017760	Ghir_A02G007540	Ghir_A06G021280	Ghir_D05G022780	Ghir_A05G002170	Ghir_A03G008410	Ghir_D05G009540	Ghir_A05G019360
	Ghir_A02G006120	Ghir_A05G014760	Ghir_D01G002020	Ghir_A06G007190	Ghir_A05G028600	Ghir_A09G013360	Ghir_A05G018010	Ghir_A02G007560	Ghir_A06G021590	Ghir_D05G025310	Ghir_A05G002260	Ghir_A03G008560	Ghir_D05G010620	Ghir_A05G019380
	Ghir_A02G006480	Ghir_A05G015610	Ghir_D01G003900	Ghir_A06G007590	Ghir_A05G028840	Ghir_A09G015460	Ghir_A05G018100	Ghir_A02G007640	Ghir_A06G022040	Ghir_D05G027750	Ghir_A05G002480	Ghir_A03G008650	Ghir_D05G011580	Ghir_A05G019740
	Ghir_A02G006620	Ghir_A05G016320	Ghir_D01G004520	Ghir_A06G009170	Ghir_A05G029240	Ghir_A09G015590	Ghir_A05G018420	Ghir_A02G007740	Ghir_A06G022610	Ghir_D05G028390	Ghir_A05G002490	Ghir_A03G008670	Ghir_D05G013640	Ghir_A05G020730
	Ghir_A02G006660	Ghir_A05G016880	Ghir_D01G007090	Ghir_A06G009600	Ghir_A05G029940	Ghir_A09G015780	Ghir_A05G019020	Ghir_A02G007910	Ghir_A07G000500	Ghir_D05G028530	Ghir_A05G003480	Ghir_A03G008780	Ghir_D05G016620	Ghir_A05G021020
	Ghir_A02G006760	Ghir_A05G017040	Ghir_D01G008890	Ghir_A06G010090	Ghir_A05G029970	Ghir_A09G016580	Ghir_A05G019150	Ghir_A02G008370	Ghir_A07G000720	Ghir_D05G030330	Ghir_A05G003650	Ghir_A03G008800	Ghir_D05G018030	Ghir_A05G021140
	Ghir_A02G006970	Ghir_A05G017550	Ghir_D01G009240	Ghir_A06G010160	Ghir_A05G030520	Ghir_A09G017080	Ghir_A05G019360	Ghir_A02G008590	Ghir_A07G001400	Ghir_D05G032100	Ghir_A05G005490	Ghir_A03G009210	Ghir_D05G019100	Ghir_A05G021820
	Ghir_A02G007050	Ghir_A05G017680	Ghir_D01G009790	Ghir_A06G010270	Ghir_A05G030660	Ghir_A09G017200	Ghir_A05G019380	Ghir_A02G008600	Ghir_A07G001840	Ghir_D06G001070	Ghir_A05G005890	Ghir_A03G009940	Ghir_D05G019670	Ghir_A05G022130
	Ghir_A02G007060	Ghir_A05G017900	Ghir_D01G010990	Ghir_A06G010350	Ghir_A05G032490	Ghir_A09G018390	Ghir_A05G019740	Ghir_A02G008610	Ghir_A07G001960	Ghir_D06G001800	Ghir_A05G006180	Ghir_A03G010080	Ghir_D05G022390	Ghir_A05G022640
	Ghir_A02G007150	Ghir_A05G018560	Ghir_D01G012050	Ghir_A06G010640	Ghir_A05G033840	Ghir_A09G020030	Ghir_A05G019780	Ghir_A02G008640	Ghir_A07G002460	Ghir_D06G002130	Ghir_A05G006270	Ghir_A03G011120	Ghir_D05G030010	Ghir_A05G023160
	Ghir_A02G007200	Ghir_A05G018840	Ghir_D01G013140	Ghir_A06G010680	Ghir_A05G033910	Ghir_A09G020060	Ghir_A05G020170	Ghir_A02G008710	Ghir_A07G003300	Ghir_D06G002410	Ghir_A05G006360	Ghir_A03G011140	Ghir_D05G030180	Ghir_A05G023210
	Ghir_A02G007460	Ghir_A05G020670	Ghir_D01G014290	Ghir_A06G011010	Ghir_A05G034420	Ghir_A09G020320	Ghir_A05G020370	Ghir_A02G008840	Ghir_A07G003420	Ghir_D06G004070	Ghir_A05G006510	Ghir_A03G011210	Ghir_D05G031420	Ghir_A05G023290
	Ghir_A02G007480	Ghir_A05G021760	Ghir_D01G014560	Ghir_A06G011490	Ghir_A05G034510	Ghir_A09G022450	Ghir_A05G020660	Ghir_A02G008850	Ghir_A07G004100	Ghir_D06G004470	Ghir_A05G006580	Ghir_A03G011350	Ghir_D05G038420	Ghir_A05G023410
	Ghir_A02G007560	Ghir_A05G022710	Ghir_D01G015210	Ghir_A06G011500	Ghir_A05G034800	Ghir_A09G023430	Ghir_A05G021020	Ghir_A02G008900	Ghir_A07G005460	Ghir_D06G005850	Ghir_A05G006800	Ghir_A03G011400	Ghir_D06G002160	Ghir_A05G023500
	Ghir_A02G007670	Ghir_A05G022790	Ghir_D01G015920	Ghir_A06G011540	Ghir_A05G035110	Ghir_A09G024370	Ghir_A05G021480	Ghir_A02G009580	Ghir_A07G005720	Ghir_D06G008770	Ghir_A05G007160	Ghir_A03G012010	Ghir_D06G003680	Ghir_A05G023900
	Ghir_A02G007740	Ghir_A05G023160	Ghir_D01G019960	Ghir_A06G011590	Ghir_A05G035210	Ghir_A09G024820	Ghir_A05G021780	Ghir_A02G009840	Ghir_A07G006800	Ghir_D06G010240	Ghir_A05G007250	Ghir_A03G012840	Ghir_D06G006850	Ghir_A05G024250
	Ghir_A02G007910	Ghir_A05G023500	Ghir_D01G023680	Ghir_A06G011670	Ghir_A05G035730	Ghir_A09G024920	Ghir_A05G021820	Ghir_A02G009940	Ghir_A07G007670	Ghir_D06G010280	Ghir_A05G008030	Ghir_A03G013060	Ghir_D06G007250	Ghir_A05G024560
	Ghir_A02G008110	Ghir_A05G024100	Ghir_D02G000150	Ghir_A06G012400	Ghir_A05G035940	Ghir_A10G000780	Ghir_A05G021980	Ghir_A02G009980	Ghir_A07G007860	Ghir_D06G010320	Ghir_A05G008390	Ghir_A03G013260	Ghir_D06G009160	Ghir_A05G024870
	Ghir_A02G008300	Ghir_A05G025080	Ghir_D02G001040	Ghir_A06G014230	Ghir_A05G036010	Ghir_A10G002500	Ghir_A05G022130	Ghir_A02G010160	Ghir_A07G008040	Ghir_D06G011120	Ghir_A05G008480	Ghir_A03G013440	Ghir_D06G009820	Ghir_A05G025220
	Ghir_A02G008370	Ghir_A05G025220	Ghir_D02G001510	Ghir_A06G015990	Ghir_A05G036150	Ghir_A10G003700	Ghir_A05G022390	Ghir_A02G010200	Ghir_A07G008520	Ghir_D06G012960	Ghir_A05G008710	Ghir_A03G013450	Ghir_D06G013410	Ghir_A05G025230
	Ghir_A02G008590	Ghir_A05G025390	Ghir_D02G004430	Ghir_A06G016060	Ghir_A05G036280	Ghir_A10G003800	Ghir_A05G022640	Ghir_A02G010430	Ghir_A07G008980	Ghir_D06G014220	Ghir_A05G010130	Ghir_A03G013680	Ghir_D06G014320	Ghir_A05G025390
	Ghir_A02G008600	Ghir_A05G025550	Ghir_D02G004490	Ghir_A06G016130	Ghir_A05G038410	Ghir_A10G004590	Ghir_A05G023210	Ghir_A02G010450	Ghir_A07G009610	Ghir_D06G016310	Ghir_A05G010340	Ghir_A03G013940	Ghir_D06G014560	Ghir_A05G025550
	Ghir_A02G008610	Ghir_A05G026610	Ghir_D02G006250	Ghir_A06G016570	Ghir_A05G038670	Ghir_A10G005900	Ghir_A05G023290	Ghir_A02G010610	Ghir_A07G009670	Ghir_D06G022920	Ghir_A05G010460	Ghir_A03G013980	Ghir_D06G014770	Ghir_A05G026720
	Ghir_A02G008710	Ghir_A05G026890	Ghir_D02G010080	Ghir_A06G016890	Ghir_A05G039050	Ghir_A10G006530	Ghir_A05G023900	Ghir_A02G010620	Ghir_A07G009990	Ghir_D06G023520	Ghir_A05G010620	Ghir_A03G014090	Ghir_D06G016280	Ghir_A05G027200
	Ghir_A02G008840	Ghir_A05G027200	Ghir_D02G015340	Ghir_A06G017420	Ghir_A05G039690	Ghir_A10G007280	Ghir_A05G024280	Ghir_A02G011000	Ghir_A07G010000	Ghir_D07G003610	Ghir_A05G011400	Ghir_A03G014530	Ghir_D06G017970	Ghir_A05G027280
	Ghir_A02G009030	Ghir_A05G027380	Ghir_D02G015850	Ghir_A06G017700	Ghir_A05G040000	Ghir_A10G008030	Ghir_A05G024560	Ghir_A02G011030	Ghir_A07G010760	Ghir_D07G005860	Ghir_A05G011770	Ghir_A03G014720	Ghir_D06G022570	Ghir_A05G027830
	Ghir_A02G009230	Ghir_A05G028400	Ghir_D02G016620	Ghir_A06G018150	Ghir_A05G041910	Ghir_A10G010280	Ghir_A05G024710	Ghir_A02G011240	Ghir_A07G011600	Ghir_D07G007780	Ghir_A05G011880	Ghir_A03G014940	Ghir_D07G000120	Ghir_A05G029060
	Ghir_A02G009450	Ghir_A05G028810	Ghir_D02G017750	Ghir_A06G018950	Ghir_A05G042140	Ghir_A10G011430	Ghir_A05G024760	Ghir_A02G011300	Ghir_A07G011810	Ghir_D07G009510	Ghir_A05G011920	Ghir_A03G016190	Ghir_D07G002020	Ghir_A05G029190
	Ghir_A02G009580	Ghir_A05G029740	Ghir_D02G019850	Ghir_A06G019530	Ghir_A05G042320	Ghir_A10G013570	Ghir_A05G024870	Ghir_A02G011560	Ghir_A07G012020	Ghir_D07G012560	Ghir_A05G012070	Ghir_A03G016510	Ghir_D07G003310	Ghir_A05G029260
	Ghir_A02G009700	Ghir_A05G030000	Ghir_D02G020580	Ghir_A06G019710	Ghir_A05G043370	Ghir_A10G013760	Ghir_A05G024950	Ghir_A02G012270	Ghir_A07G012060	Ghir_D07G015550	Ghir_A05G012160	Ghir_A03G016630	Ghir_D07G003820	Ghir_A05G029280
	Ghir_A02G009980	Ghir_A05G031160	Ghir_D02G022560	Ghir_A06G020170	Ghir_A06G000240	Ghir_A10G013990	Ghir_A05G025400	Ghir_A02G012370	Ghir_A07G012720	Ghir_D07G017980	Ghir_A05G012240	Ghir_A03G016780	Ghir_D07G004240	Ghir_A05G029740
	Ghir_A02G010010	Ghir_A05G031600	Ghir_D02G022750	Ghir_A06G020470	Ghir_A06G000360	Ghir_A10G014920	Ghir_A05G025450	Ghir_A02G012380	Ghir_A07G012750	Ghir_D07G023260	Ghir_A05G013400	Ghir_A03G017190	Ghir_D07G008800	Ghir_A05G029960
	Ghir_A02G010200	Ghir_A05G032060	Ghir_D02G023020	Ghir_A06G020760	Ghir_A06G000650	Ghir_A10G015290	Ghir_A05G025920	Ghir_A02G012570	Ghir_A07G013380	Ghir_D07G024980	Ghir_A05G013920	Ghir_A03G017280	Ghir_D07G011990	Ghir_A05G030000
	Ghir_A02G010450	Ghir_A05G032090	Ghir_D03G004350	Ghir_A06G022580	Ghir_A06G001540	Ghir_A10G015590	Ghir_A05G026720	Ghir_A02G012780	Ghir_A07G013600	Ghir_D07G025120	Ghir_A05G014090	Ghir_A03G017290	Ghir_D07G014140	Ghir_A05G030320
	Ghir_A02G010610	Ghir_A05G032670	Ghir_D03G007050	Ghir_A07G000050	Ghir_A06G002010	Ghir_A10G016810	Ghir_A05G027110	Ghir_A02G012790	Ghir_A07G013610	Ghir_D07G025140	Ghir_A05G014350	Ghir_A03G018260	Ghir_D07G014200	Ghir_A05G030380
	Ghir_A02G010990	Ghir_A05G034750	Ghir_D03G007150	Ghir_A07G000610	Ghir_A06G002450	Ghir_A10G017220	Ghir_A05G027280	Ghir_A02G013110	Ghir_A07G013670	Ghir_D08G001550	Ghir_A05G014390	Ghir_A03G018540	Ghir_D07G014670	Ghir_A05G030410
	Ghir_A02G011000	Ghir_A05G034860	Ghir_D03G010260	Ghir_A07G000980	Ghir_A06G002770	Ghir_A10G017360	Ghir_A05G027830	Ghir_A02G013260	Ghir_A07G013930	Ghir_D08G002390	Ghir_A05G015070	Ghir_A03G018570	Ghir_D07G016350	Ghir_A05G031160
	Ghir_A02G011240	Ghir_A05G035200	Ghir_D03G010670	Ghir_A07G002210	Ghir_A06G002960	Ghir_A10G018270	Ghir_A05G029160	Ghir_A02G013380	Ghir_A07G013950	Ghir_D08G003210	Ghir_A05G015220	Ghir_A03G018620	Ghir_D07G016990	Ghir_A05G031600
	Ghir_A02G011810	Ghir_A05G035630	Ghir_D03G010730	Ghir_A07G002380	Ghir_A06G003020	Ghir_A10G019640	Ghir_A05G029540	Ghir_A02G013610	Ghir_A07G014420	Ghir_D08G004240	Ghir_A05G015400	Ghir_A03G018750	Ghir_D07G017470	Ghir_A05G032060
	Ghir_A02G011860	Ghir_A05G035740	Ghir_D03G011710	Ghir_A07G002780	Ghir_A06G003030	Ghir_A10G022570	Ghir_A05G029960	Ghir_A02G013620	Ghir_A07G014950	Ghir_D08G004880	Ghir_A05G015560	Ghir_A03G018840	Ghir_D07G018550	Ghir_A05G032090
	Ghir_A02G012000	Ghir_A05G037080	Ghir_D03G013860	Ghir_A07G003430	Ghir_A06G003140	Ghir_A10G022610	Ghir_A05G030410	Ghir_A02G013750	Ghir_A07G015060	Ghir_D08G013460	Ghir_A05G015880	Ghir_A03G018850	Ghir_D07G019290	Ghir_A05G032480
	Ghir_A02G012200	Ghir_A05G037170	Ghir_D03G014230	Ghir_A07G003490	Ghir_A06G003640	Ghir_A10G022760	Ghir_A05G031940	Ghir_A02G013770	Ghir_A07G015800	Ghir_D08G014650	Ghir_A05G016540	Ghir_A03G019390	Ghir_D07G019470	Ghir_A05G032540
	Ghir_A02G012380	Ghir_A05G037810	Ghir_D03G014740	Ghir_A07G004840	Ghir_A06G003690	Ghir_A10G023160	Ghir_A05G032480	Ghir_A02G013980	Ghir_A07G016030	Ghir_D08G015640	Ghir_A05G016660	Ghir_A03G019630	Ghir_D07G020510	Ghir_A05G032940
	Ghir_A02G012430	Ghir_A05G037910	Ghir_D03G016610	Ghir_A07G005590	Ghir_A06G003830	Ghir_A10G023700	Ghir_A05G032660	Ghir_A02G014000	Ghir_A07G016170	Ghir_D08G015740	Ghir_A05G016740	Ghir_A03G019710	Ghir_D07G023100	Ghir_A05G033040
	Ghir_A02G012490	Ghir_A05G038730	Ghir_D04G001150	Ghir_A07G005720	Ghir_A06G003980	Ghir_A10G024240	Ghir_A05G032940	Ghir_A02G014090	Ghir_A07G016650	Ghir_D08G016570	Ghir_A05G016880	Ghir_A03G019860	Ghir_D08G000420	Ghir_A05G033930
	Ghir_A02G012560	Ghir_A05G038990	Ghir_D04G001690	Ghir_A07G006030	Ghir_A06G005610	Ghir_A11G001150	Ghir_A05G034310	Ghir_A02G014100	Ghir_A07G017430	Ghir_D08G016780	Ghir_A05G017760	Ghir_A03G019980	Ghir_D08G003970	Ghir_A05G034330
	Ghir_A02G012570	Ghir_A05G040940	Ghir_D04G002170	Ghir_A07G006370	Ghir_A06G006840	Ghir_A11G004760	Ghir_A05G034330	Ghir_A02G014270	Ghir_A07G017890	Ghir_D08G017510	Ghir_A05G017870	Ghir_A03G020150	Ghir_D08G010290	Ghir_A05G034950
	Ghir_A02G012790	Ghir_A05G041040	Ghir_D04G002860	Ghir_A07G006470	Ghir_A06G007020	Ghir_A11G004900	Ghir_A05G035220	Ghir_A02G014280	Ghir_A07G018050	Ghir_D08G018010	Ghir_A05G018010	Ghir_A03G020160	Ghir_D08G013730	Ghir_A05G036110
	Ghir_A02G012880	Ghir_A05G041340	Ghir_D04G003840	Ghir_A07G006690	Ghir_A06G008280	Ghir_A11G006250	Ghir_A05G035410	Ghir_A02G014400	Ghir_A07G019400	Ghir_D08G019380	Ghir_A05G018100	Ghir_A03G020500	Ghir_D08G014480	Ghir_A05G036960
	Ghir_A02G013110	Ghir_A05G041460	Ghir_D04G006310	Ghir_A07G006710	Ghir_A06G008300	Ghir_A11G007810	Ghir_A05G035430	Ghir_A02G014620	Ghir_A07G020320	Ghir_D08G022040	Ghir_A05G019310	Ghir_A03G020570	Ghir_D08G015110	Ghir_A05G037050
	Ghir_A02G013260	Ghir_A05G041750	Ghir_D04G011800	Ghir_A07G007100	Ghir_A06G008400	Ghir_A11G007960	Ghir_A05G035480	Ghir_A02G014670	Ghir_A07G020490	Ghir_D08G022110	Ghir_A05G019630	Ghir_A03G020820	Ghir_D08G015120	Ghir_A05G037550
	Ghir_A02G013270	Ghir_A05G042330	Ghir_D04G011910	Ghir_A07G007300	Ghir_A06G008830	Ghir_A11G008920	Ghir_A05G036110	Ghir_A02G014690	Ghir_A07G020840	Ghir_D08G022850	Ghir_A05G020960	Ghir_A03G020900	Ghir_D08G020290	Ghir_A05G037810
	Ghir_A02G013370	Ghir_A05G042350	Ghir_D04G014960	Ghir_A07G007770	Ghir_A06G008880	Ghir_A11G009060	Ghir_A05G036960	Ghir_A02G014970	Ghir_A07G021200	Ghir_D08G022990	Ghir_A05G021670	Ghir_A03G020940	Ghir_D08G020790	Ghir_A05G038090
	Ghir_A02G013570	Ghir_A05G042560	Ghir_D04G014970	Ghir_A07G007920	Ghir_A06G008940	Ghir_A11G010440	Ghir_A05G037550	Ghir_A02G015000	Ghir_A07G021370	Ghir_D08G023630	Ghir_A05G021780	Ghir_A03G021490	Ghir_D08G021170	Ghir_A05G038240
	Ghir_A02G013610	Ghir_A06G000050	Ghir_D04G015190	Ghir_A07G007950	Ghir_A06G009000	Ghir_A11G011430	Ghir_A05G038090	Ghir_A02G015180	Ghir_A07G021380	Ghir_D08G024670	Ghir_A05G022370	Ghir_A03G021500	Ghir_D08G026810	Ghir_A05G039350
	Ghir_A02G013630	Ghir_A06G000140	Ghir_D04G016400	Ghir_A07G007980	Ghir_A06G009010	Ghir_A11G012160	Ghir_A05G038350	Ghir_A02G015230	Ghir_A07G021640	Ghir_D09G001010	Ghir_A05G022390	Ghir_A03G022110	Ghir_D09G001390	Ghir_A05G039730
	Ghir_A02G013750	Ghir_A06G000210	Ghir_D04G017070	Ghir_A07G008030	Ghir_A06G010140	Ghir_A11G012680	Ghir_A05G039000	Ghir_A02G015290	Ghir_A08G001000	Ghir_D09G003600	Ghir_A05G023130	Ghir_A03G022180	Ghir_D09G002000	Ghir_A05G039790
	Ghir_A02G013770	Ghir_A06G000400	Ghir_D05G002250	Ghir_A07G008100	Ghir_A06G010590	Ghir_A11G016250	Ghir_A05G039350	Ghir_A02G015370	Ghir_A08G002270	Ghir_D09G004560	Ghir_A05G024050	Ghir_A03G022290	Ghir_D09G005900	Ghir_A05G039820
	Ghir_A02G013980	Ghir_A06G000830	Ghir_D05G003490	Ghir_A07G010760	Ghir_A06G010810	Ghir_A11G017560	Ghir_A05G039380	Ghir_A02G015410	Ghir_A08G002450	Ghir_D09G010780	Ghir_A05G024150	Ghir_A03G022350	Ghir_D09G006800	Ghir_A05G040320
	Ghir_A02G013990	Ghir_A06G001700	Ghir_D05G004580	Ghir_A07G011180	Ghir_A06G010980	Ghir_A11G018110	Ghir_A05G039730	Ghir_A02G015420	Ghir_A08G002940	Ghir_D09G011120	Ghir_A05G024530	Ghir_A03G022370	Ghir_D09G007010	Ghir_A05G040660
	Ghir_A02G014090	Ghir_A06G001790	Ghir_D05G006350	Ghir_A07G011600	Ghir_A06G011660	Ghir_A11G018200	Ghir_A05G040320	Ghir_A02G015430	Ghir_A08G003770	Ghir_D09G011810	Ghir_A05G024710	Ghir_A03G022450	Ghir_D09G009410	Ghir_A05G040960
	Ghir_A02G014160	Ghir_A06G002230	Ghir_D05G006540	Ghir_A07G011850	Ghir_A06G012690	Ghir_A11G019620	Ghir_A05G040420	Ghir_A02G015450	Ghir_A08G003800	Ghir_D09G018680	Ghir_A05G024760	Ghir_A03G022570	Ghir_D09G009870	Ghir_A05G041250
	Ghir_A02G014280	Ghir_A06G002590	Ghir_D05G006850	Ghir_A07G012020	Ghir_A06G012760	Ghir_A11G020820	Ghir_A05G040540	Ghir_A02G015700	Ghir_A08G004160	Ghir_D09G022290	Ghir_A05G024950	Ghir_A03G022620	Ghir_D09G009910	Ghir_A05G041690
	Ghir_A02G014290	Ghir_A06G002880	Ghir_D05G007460	Ghir_A07G013670	Ghir_A06G013030	Ghir_A11G021070	Ghir_A05G041250	Ghir_A02G015720	Ghir_A08G004470	Ghir_D09G022630	Ghir_A05G025040	Ghir_A03G022680	Ghir_D09G011130	Ghir_A05G042560
	Ghir_A02G014330	Ghir_A06G004110	Ghir_D05G007550	Ghir_A07G014950	Ghir_A06G014780	Ghir_A11G021250	Ghir_A05G041590	Ghir_A02G016640	Ghir_A08G005490	Ghir_D09G023910	Ghir_A05G025070	Ghir_A03G022800	Ghir_D09G012720	Ghir_A05G042720
	Ghir_A02G014400	Ghir_A06G004130	Ghir_D05G009610	Ghir_A07G015040	Ghir_A06G015140	Ghir_A11G021970	Ghir_A05G041970	Ghir_A02G016870	Ghir_A08G005810	Ghir_D10G000080	Ghir_A05G025080	Ghir_A03G022820	Ghir_D09G013880	Ghir_A05G042880
	Ghir_A02G014430	Ghir_A06G004170	Ghir_D05G010130	Ghir_A07G015060	Ghir_A06G015290	Ghir_A11G021980	Ghir_A05G042550	Ghir_A02G017010	Ghir_A08G006800	Ghir_D10G000560	Ghir_A05G025400	Ghir_A03G022840	Ghir_D09G014010	Ghir_A05G043520
	Ghir_A02G014540	Ghir_A06G004890	Ghir_D05G012890	Ghir_A07G015800	Ghir_A06G016630	Ghir_A11G022560	Ghir_A05G042650	Ghir_A02G017270	Ghir_A08G007540	Ghir_D10G004720	Ghir_A05G025450	Ghir_A03G023060	Ghir_D09G014410	Ghir_A06G000180
	Ghir_A02G014670	Ghir_A06G004970	Ghir_D05G013210	Ghir_A07G015940	Ghir_A06G017580	Ghir_A11G022770	Ghir_A05G042880	Ghir_A02G017540	Ghir_A08G007750	Ghir_D10G007810	Ghir_A05G026890	Ghir_A03G023090	Ghir_D09G014910	Ghir_A06G000400
	Ghir_A02G014690	Ghir_A06G005040	Ghir_D05G013650	Ghir_A07G016870	Ghir_A06G017590	Ghir_A11G024680	Ghir_A06G000180	Ghir_A02G017560	Ghir_A08G008850	Ghir_D10G016200	Ghir_A05G027750	Ghir_A03G023690	Ghir_D09G015910	Ghir_A06G000480
	Ghir_A02G014740	Ghir_A06G005110	Ghir_D05G013870	Ghir_A07G017130	Ghir_A06G018140	Ghir_A11G026230	Ghir_A06G000330	Ghir_A02G017620	Ghir_A08G008940	Ghir_D10G020950	Ghir_A05G028380	Ghir_A03G023810	Ghir_D09G017320	Ghir_A06G000980
	Ghir_A02G014990	Ghir_A06G005550	Ghir_D05G014830	Ghir_A07G017300	Ghir_A06G022370	Ghir_A11G027410	Ghir_A06G001050	Ghir_A02G017780	Ghir_A08G010120	Ghir_D10G027690	Ghir_A05G029160	Ghir_A04G000220	Ghir_D09G018420	Ghir_A06G001050
	Ghir_A02G015000	Ghir_A06G005620	Ghir_D05G015220	Ghir_A07G017850	Ghir_A06G022440	Ghir_A11G029890	Ghir_A06G001590	Ghir_A02G017940	Ghir_A08G011150	Ghir_D11G002990	Ghir_A05G029560	Ghir_A04G000580	Ghir_D09G019780	Ghir_A06G001150
	Ghir_A02G015180	Ghir_A06G007240	Ghir_D05G018890	Ghir_A07G018360	Ghir_A06G022790	Ghir_A11G031450	Ghir_A06G001830	Ghir_A02G018120	Ghir_A08G012250	Ghir_D11G003740	Ghir_A05G029610	Ghir_A04G000600	Ghir_D09G020460	Ghir_A06G001750
	Ghir_A02G015230	Ghir_A06G007340	Ghir_D05G024760	Ghir_A07G018900	Ghir_A07G000440	Ghir_A11G032260	Ghir_A06G001970	Ghir_A02G018190	Ghir_A08G014310	Ghir_D11G004790	Ghir_A05G029780	Ghir_A04G000980	Ghir_D09G021500	Ghir_A06G001960
	Ghir_A02G015290	Ghir_A06G008140	Ghir_D05G027430	Ghir_A07G018990	Ghir_A07G000940	Ghir_A11G032890	Ghir_A06G002100	Ghir_A02G018210	Ghir_A08G014520	Ghir_D11G006510	Ghir_A05G030630	Ghir_A04G001020	Ghir_D09G022750	Ghir_A06G001970
	Ghir_A02G015370	Ghir_A06G008310	Ghir_D05G027550	Ghir_A07G019450	Ghir_A07G001030	Ghir_A11G033300	Ghir_A06G002340	Ghir_A02G018220	Ghir_A08G014570	Ghir_D11G014460	Ghir_A05G031360	Ghir_A04G001250	Ghir_D09G024900	Ghir_A06G002230
	Ghir_A02G015410	Ghir_A06G008860	Ghir_D05G034620	Ghir_A07G019750	Ghir_A07G001320	Ghir_A11G033450	Ghir_A06G002430	Ghir_A02G018550	Ghir_A08G015000	Ghir_D11G014550	Ghir_A05G031670	Ghir_A04G001260	Ghir_D10G000760	Ghir_A06G002340
	Ghir_A02G015430	Ghir_A06G009480	Ghir_D05G035670	Ghir_A07G019780	Ghir_A07G001410	Ghir_A11G034110	Ghir_A06G002750	Ghir_A02G018660	Ghir_A08G015020	Ghir_D11G016330	Ghir_A05G031830	Ghir_A04G001710	Ghir_D10G002090	Ghir_A06G002750
	Ghir_A02G015450	Ghir_A06G009490	Ghir_D05G037330	Ghir_A07G020370	Ghir_A07G001630	Ghir_A11G034160	Ghir_A06G002790	Ghir_A02G018810	Ghir_A08G015720	Ghir_D11G017950	Ghir_A05G031940	Ghir_A04G002030	Ghir_D10G004620	Ghir_A06G003480
	Ghir_A02G015670	Ghir_A06G009940	Ghir_D06G006060	Ghir_A07G020700	Ghir_A07G002030	Ghir_A11G035320	Ghir_A06G003220	Ghir_A02G018850	Ghir_A08G015920	Ghir_D11G018750	Ghir_A05G032670	Ghir_A04G002480	Ghir_D10G005070	Ghir_A06G004650
	Ghir_A02G015700	Ghir_A06G010290	Ghir_D06G007100	Ghir_A07G021940	Ghir_A07G002350	Ghir_A12G000330	Ghir_A06G003480	Ghir_A02G019040	Ghir_A08G016210	Ghir_D11G020520	Ghir_A05G033260	Ghir_A04G002590	Ghir_D10G007020	Ghir_A06G005090
	Ghir_A02G015930	Ghir_A06G010440	Ghir_D06G010330	Ghir_A07G023200	Ghir_A07G002520	Ghir_A12G000640	Ghir_A06G004390	Ghir_A02G019260	Ghir_A08G016600	Ghir_D11G022330	Ghir_A05G033820	Ghir_A04G002870	Ghir_D10G007680	Ghir_A06G005330
	Ghir_A02G015940	Ghir_A06G011170	Ghir_D06G012580	Ghir_A07G023330	Ghir_A07G002560	Ghir_A12G000700	Ghir_A06G004450	Ghir_A02G019270	Ghir_A08G016630	Ghir_D11G022940	Ghir_A05G034170	Ghir_A04G002990	Ghir_D10G008360	Ghir_A06G005450
	Ghir_A02G016170	Ghir_A06G012030	Ghir_D06G013050	Ghir_A07G023980	Ghir_A07G002800	Ghir_A12G001260	Ghir_A06G004510	Ghir_A02G019280	Ghir_A08G018060	Ghir_D11G029520	Ghir_A05G034700	Ghir_A04G003010	Ghir_D10G010330	Ghir_A06G005550
	Ghir_A02G016210	Ghir_A06G012280	Ghir_D06G013130	Ghir_A07G024150	Ghir_A07G003080	Ghir_A12G001360	Ghir_A06G004650	Ghir_A02G019300	Ghir_A08G018380	Ghir_D11G031680	Ghir_A05G035220	Ghir_A04G003480	Ghir_D10G019680	Ghir_A06G005620
	Ghir_A02G016250	Ghir_A06G013390	Ghir_D06G015960	Ghir_A07G024310	Ghir_A07G003110	Ghir_A12G001770	Ghir_A06G005090	Ghir_A02G019400	Ghir_A08G018830	Ghir_D11G032630	Ghir_A05G035300	Ghir_A04G003620	Ghir_D10G019760	Ghir_A06G006010
	Ghir_A02G016290	Ghir_A06G013480	Ghir_D06G016310	Ghir_A07G024590	Ghir_A07G003540	Ghir_A12G006160	Ghir_A06G005450	Ghir_A02G019560	Ghir_A08G018880	Ghir_D12G004360	Ghir_A05G036360	Ghir_A04G004380	Ghir_D10G019900	Ghir_A06G006050
	Ghir_A02G016300	Ghir_A06G013930	Ghir_D06G016670	Ghir_A08G000930	Ghir_A07G003870	Ghir_A12G007160	Ghir_A06G006010	Ghir_A02G019640	Ghir_A08G018900	Ghir_D12G005070	Ghir_A05G036370	Ghir_A04G004810	Ghir_D10G020260	Ghir_A06G007590
	Ghir_A02G016320	Ghir_A06G014990	Ghir_D06G017910	Ghir_A08G001040	Ghir_A07G005280	Ghir_A12G008170	Ghir_A06G006050	Ghir_A02G019690	Ghir_A08G019210	Ghir_D12G009300	Ghir_A05G036550	Ghir_A04G005100	Ghir_D11G000170	Ghir_A06G009130
	Ghir_A02G016410	Ghir_A06G015960	Ghir_D06G018320	Ghir_A08G002270	Ghir_A07G005380	Ghir_A12G010320	Ghir_A06G007210	Ghir_A03G000060	Ghir_A08G019350	Ghir_D12G012720	Ghir_A05G037390	Ghir_A04G005430	Ghir_D11G002230	Ghir_A06G009490
	Ghir_A02G016500	Ghir_A06G016470	Ghir_D06G020310	Ghir_A08G002300	Ghir_A07G005600	Ghir_A12G010710	Ghir_A06G007300	Ghir_A03G000090	Ghir_A08G020160	Ghir_D12G012970	Ghir_A05G037960	Ghir_A04G005620	Ghir_D11G004840	Ghir_A06G009590
	Ghir_A02G016640	Ghir_A06G016640	Ghir_D07G002920	Ghir_A08G002570	Ghir_A07G006990	Ghir_A12G012320	Ghir_A06G007400	Ghir_A03G000410	Ghir_A08G021250	Ghir_D12G013170	Ghir_A05G038340	Ghir_A04G005630	Ghir_D11G008940	Ghir_A06G009650
	Ghir_A02G016870	Ghir_A06G016860	Ghir_D07G003520	Ghir_A08G002910	Ghir_A07G007370	Ghir_A12G012350	Ghir_A06G008510	Ghir_A03G000440	Ghir_A08G021700	Ghir_D12G015980	Ghir_A05G039370	Ghir_A04G005690	Ghir_D11G009020	Ghir_A06G010350
	Ghir_A02G017010	Ghir_A06G017180	Ghir_D07G008490	Ghir_A08G003230	Ghir_A07G007390	Ghir_A12G012550	Ghir_A06G009160	Ghir_A03G000500	Ghir_A08G022000	Ghir_D12G017620	Ghir_A05G039380	Ghir_A04G006130	Ghir_D11G009280	Ghir_A06G011670
	Ghir_A02G017540	Ghir_A06G017680	Ghir_D07G012750	Ghir_A08G003580	Ghir_A07G008120	Ghir_A12G013560	Ghir_A06G010030	Ghir_A03G000530	Ghir_A08G025290	Ghir_D12G022990	Ghir_A05G039520	Ghir_A04G006160	Ghir_D11G013360	Ghir_A06G011930
	Ghir_A02G017560	Ghir_A06G018080	Ghir_D07G013280	Ghir_A08G004160	Ghir_A07G008260	Ghir_A12G013640	Ghir_A06G010820	Ghir_A03G000640	Ghir_A08G025650	Ghir_D12G024410	Ghir_A05G040150	Ghir_A04G006530	Ghir_D11G014050	Ghir_A06G012280
	Ghir_A02G017610	Ghir_A06G018720	Ghir_D07G015880	Ghir_A08G004250	Ghir_A07G008460	Ghir_A12G013800	Ghir_A06G011930	Ghir_A03G000800	Ghir_A08G025980	Ghir_D12G024480	Ghir_A05G040420	Ghir_A04G006620	Ghir_D11G014430	Ghir_A06G012890
	Ghir_A02G017620	Ghir_A06G019060	Ghir_D07G015890	Ghir_A08G005050	Ghir_A07G009300	Ghir_A12G013810	Ghir_A06G012300	Ghir_A03G000820	Ghir_A09G000040	Ghir_D12G027000	Ghir_A05G040770	Ghir_A04G006700	Ghir_D11G016550	Ghir_A06G013720
	Ghir_A02G017940	Ghir_A06G019500	Ghir_D07G016720	Ghir_A08G006110	Ghir_A07G009550	Ghir_A12G014100	Ghir_A06G013100	Ghir_A03G000880	Ghir_A09G000050	Ghir_D12G027060	Ghir_A05G041040	Ghir_A04G006840	Ghir_D11G017190	Ghir_A06G014030
	Ghir_A02G018210	Ghir_A06G019740	Ghir_D07G019280	Ghir_A08G006630	Ghir_A07G009630	Ghir_A12G014770	Ghir_A06G013720	Ghir_A03G001090	Ghir_A09G000090	Ghir_D12G027850	Ghir_A05G041150	Ghir_A04G006990	Ghir_D11G017280	Ghir_A06G014250
	Ghir_A02G018220	Ghir_A06G019910	Ghir_D07G019750	Ghir_A08G006640	Ghir_A07G009940	Ghir_A12G015110	Ghir_A06G014030	Ghir_A03G001160	Ghir_A09G002210	Ghir_D12G028590	Ghir_A05G041610	Ghir_A04G007030	Ghir_D11G017750	Ghir_A06G015060
	Ghir_A02G018250	Ghir_A06G020410	Ghir_D07G020040	Ghir_A08G008850	Ghir_A07G010030	Ghir_A12G016700	Ghir_A06G014150	Ghir_A03G001220	Ghir_A09G002240	Ghir_D13G005040	Ghir_A05G041970	Ghir_A04G007720	Ghir_D11G017920	Ghir_A06G015610
	Ghir_A02G018500	Ghir_A06G020780	Ghir_D07G021670	Ghir_A08G011030	Ghir_A07G010050	Ghir_A12G017140	Ghir_A06G014250	Ghir_A03G001230	Ghir_A09G002980	Ghir_D13G010380	Ghir_A05G042170	Ghir_A04G007960	Ghir_D11G019790	Ghir_A06G016180
	Ghir_A02G018550	Ghir_A06G020910	Ghir_D07G023260	Ghir_A08G011420	Ghir_A07G010790	Ghir_A12G018100	Ghir_A06G015330	Ghir_A03G001250	Ghir_A09G003550	Ghir_D13G013980	Ghir_A05G042330	Ghir_A04G008120	Ghir_D11G025890	Ghir_A06G016200
	Ghir_A02G018660	Ghir_A06G020920	Ghir_D07G023520	Ghir_A08G011880	Ghir_A07G010930	Ghir_A12G018320	Ghir_A06G015350	Ghir_A03G001270	Ghir_A09G003900	Ghir_D13G015110	Ghir_A05G042550	Ghir_A04G008530	Ghir_D11G026350	Ghir_A06G016460
	Ghir_A02G018810	Ghir_A06G021150	Ghir_D07G024110	Ghir_A08G012670	Ghir_A07G011620	Ghir_A12G019730	Ghir_A06G015580	Ghir_A03G001350	Ghir_A09G005520	Ghir_D13G015760	Ghir_A06G000260	Ghir_A04G008550	Ghir_D11G028010	Ghir_A06G016590
	Ghir_A02G018960	Ghir_A06G021280	Ghir_D08G004880	Ghir_A08G012690	Ghir_A07G012290	Ghir_A12G020350	Ghir_A06G016120	Ghir_A03G001360	Ghir_A09G005720	Ghir_D13G016090	Ghir_A06G001420	Ghir_A04G008590	Ghir_D11G033550	Ghir_A06G016860
	Ghir_A02G019050	Ghir_A06G021560	Ghir_D08G005830	Ghir_A08G012700	Ghir_A07G012660	Ghir_A12G020380	Ghir_A06G016180	Ghir_A03G001430	Ghir_A09G005860	Ghir_D13G016280	Ghir_A06G002100	Ghir_A04G009100	Ghir_D11G034560	Ghir_A06G017540
	Ghir_A02G019060	Ghir_A06G021590	Ghir_D08G005890	Ghir_A08G013370	Ghir_A07G014030	Ghir_A12G021620	Ghir_A06G016200	Ghir_A03G001520	Ghir_A09G006370	Ghir_D13G016770	Ghir_A06G002300	Ghir_A04G009160	Ghir_D11G035230	Ghir_A06G018080
	Ghir_A02G019100	Ghir_A06G022040	Ghir_D08G007610	Ghir_A08G013600	Ghir_A07G014050	Ghir_A12G023500	Ghir_A06G016460	Ghir_A03G001760	Ghir_A09G006780	Ghir_D13G016780	Ghir_A06G003770	Ghir_A04G009510	Ghir_D11G035580	Ghir_A06G018820
	Ghir_A02G019250	Ghir_A06G022610	Ghir_D08G007950	Ghir_A08G013660	Ghir_A07G014070	Ghir_A12G023610	Ghir_A06G016530	Ghir_A03G001780	Ghir_A09G006950	Ghir_D13G017240	Ghir_A06G004510	Ghir_A04G009640	Ghir_D11G035590	Ghir_A06G018950
	Ghir_A02G019270	Ghir_A07G000200	Ghir_D08G010080	Ghir_A08G013690	Ghir_A07G014470	Ghir_A12G024240	Ghir_A06G016590	Ghir_A03G002440	Ghir_A09G007720	Ghir_D13G018450	Ghir_A06G004970	Ghir_A04G010510	Ghir_D11G036410	Ghir_A06G019050
	Ghir_A02G019280	Ghir_A07G000350	Ghir_D08G011490	Ghir_A08G014910	Ghir_A07G014540	Ghir_A12G025860	Ghir_A06G018310	Ghir_A03G003020	Ghir_A09G008520	Ghir_D13G019280	Ghir_A06G005140	Ghir_A04G010570	Ghir_D12G003310	Ghir_A06G019130
	Ghir_A02G019560	Ghir_A07G000500	Ghir_D08G013040	Ghir_A08G015730	Ghir_A07G014670	Ghir_A12G026060	Ghir_A06G018830	Ghir_A03G003720	Ghir_A09G009650	Ghir_D13G020070	Ghir_A06G005270	Ghir_A04G010780	Ghir_D12G004940	Ghir_A06G019180
	Ghir_A03G000260	Ghir_A07G000720	Ghir_D08G013500	Ghir_A08G015920	Ghir_A07G014770	Ghir_A12G026340	Ghir_A06G019050	Ghir_A03G003740	Ghir_A09G009910	Ghir_D13G022330	Ghir_A06G005630	Ghir_A04G011250	Ghir_D12G005020	Ghir_A06G019500
	Ghir_A03G000340	Ghir_A07G001040	Ghir_D08G018500	Ghir_A08G016290	Ghir_A07G015360	Ghir_A12G026500	Ghir_A06G019130	Ghir_A03G003880	Ghir_A09G010200	Ghir_D13G022430	Ghir_A06G005690	Ghir_A04G011570	Ghir_D12G007560	Ghir_A06G019890
	Ghir_A03G000410	Ghir_A07G001400	Ghir_D08G019480	Ghir_A08G017170	Ghir_A07G015380	Ghir_A12G027850	Ghir_A06G019430	Ghir_A03G004120	Ghir_A09G011640	Ghir_D13G022620	Ghir_A06G005970	Ghir_A04G011650	Ghir_D12G008910	Ghir_A06G019910
	Ghir_A03G000440	Ghir_A07G001590	Ghir_D08G019530	Ghir_A08G019640	Ghir_A07G015580	Ghir_A12G027860	Ghir_A06G020510	Ghir_A03G004170	Ghir_A09G012460	Ghir_D13G022660	Ghir_A06G006260	Ghir_A04G012050	Ghir_D12G011120	Ghir_A06G020410
	Ghir_A03G000530	Ghir_A07G001680	Ghir_D08G021350	Ghir_A08G020080	Ghir_A07G015590	Ghir_A12G028010	Ghir_A06G021070	Ghir_A03G004380	Ghir_A09G012590	Ghir_D13G024250	Ghir_A06G006700	Ghir_A04G012100	Ghir_D12G013780	Ghir_A06G020510
	Ghir_A03G000640	Ghir_A07G001840	Ghir_D08G024670	Ghir_A08G021410	Ghir_A07G015760	Ghir_A13G001670	Ghir_A06G021510	Ghir_A03G004430	Ghir_A09G012670	Ghir_D13G024810	Ghir_A06G006890	Ghir_A04G012780	Ghir_D12G014210	Ghir_A06G020910
	Ghir_A03G000820	Ghir_A07G001960	Ghir_D08G026310	Ghir_A08G021690	Ghir_A07G016610	Ghir_A13G001910	Ghir_A06G021620	Ghir_A03G004520	Ghir_A09G013010	Ghir_Scaffold2291G000010	Ghir_A06G007210	Ghir_A04G013550	Ghir_D12G018910	Ghir_A06G020920
	Ghir_A03G000880	Ghir_A07G002290	Ghir_D08G026520	Ghir_A08G022210	Ghir_A07G016660	Ghir_A13G003000	Ghir_A06G021710	Ghir_A03G004560	Ghir_A09G013320	Ghir_Scaffold423G000150	Ghir_A06G007340	Ghir_A04G014360	Ghir_D12G020390	Ghir_A06G021180
	Ghir_A03G001090	Ghir_A07G002810	Ghir_D08G027210	Ghir_A08G022720	Ghir_A07G016740	Ghir_A13G003460	Ghir_A06G021960	Ghir_A03G004610	Ghir_A09G013400		Ghir_A06G008140	Ghir_A04G014490	Ghir_D12G022090	Ghir_A06G021290
	Ghir_A03G001220	Ghir_A07G005320	Ghir_D08G027260	Ghir_A08G022950	Ghir_A07G016980	Ghir_A13G003970	Ghir_A06G022160	Ghir_A03G004860	Ghir_A09G013530		Ghir_A06G008310	Ghir_A04G014580	Ghir_D12G022520	Ghir_A06G021560
	Ghir_A03G001230	Ghir_A07G005460	Ghir_D08G027360	Ghir_A08G023750	Ghir_A07G017240	Ghir_A13G004120	Ghir_A06G022490	Ghir_A03G004870	Ghir_A09G013890		Ghir_A06G008510	Ghir_A04G014940	Ghir_D12G022530	Ghir_A06G021960
	Ghir_A03G001250	Ghir_A07G005730	Ghir_D08G027950	Ghir_A08G024200	Ghir_A07G017420	Ghir_A13G004300	Ghir_A07G000300	Ghir_A03G005190	Ghir_A09G014250		Ghir_A06G009170	Ghir_A04G015000	Ghir_D12G023660	Ghir_A06G022490
	Ghir_A03G001270	Ghir_A07G006480	Ghir_D09G001020	Ghir_A08G024260	Ghir_A07G017450	Ghir_A13G005970	Ghir_A07G001070	Ghir_A03G005480	Ghir_A09G015260		Ghir_A06G010090	Ghir_A04G015060	Ghir_D12G025490	Ghir_A06G022580
	Ghir_A03G001300	Ghir_A07G006580	Ghir_D09G003750	Ghir_A08G024330	Ghir_A07G017620	Ghir_A13G007600	Ghir_A07G001090	Ghir_A03G005650	Ghir_A09G015350		Ghir_A06G010270	Ghir_A04G015410	Ghir_D12G028850	Ghir_A07G001090
	Ghir_A03G001350	Ghir_A07G006800	Ghir_D09G007010	Ghir_A08G024590	Ghir_A07G017640	Ghir_A13G009030	Ghir_A07G001160	Ghir_A03G005660	Ghir_A09G015830		Ghir_A06G010410	Ghir_A04G016330	Ghir_D12G028970	Ghir_A07G001170
	Ghir_A03G001360	Ghir_A07G006940	Ghir_D09G007880	Ghir_A08G024900	Ghir_A07G017750	Ghir_A13G009400	Ghir_A07G001170	Ghir_A03G005720	Ghir_A09G015850		Ghir_A06G010820	Ghir_A05G000130	Ghir_D13G002120	Ghir_A07G001490
	Ghir_A03G001400	Ghir_A07G007120	Ghir_D09G008470	Ghir_A08G025180	Ghir_A07G018000	Ghir_A13G010050	Ghir_A07G002160	Ghir_A03G005890	Ghir_A09G016060		Ghir_A06G011430	Ghir_A05G000400	Ghir_D13G002990	Ghir_A07G002290
	Ghir_A03G001430	Ghir_A07G007360	Ghir_D09G011360	Ghir_A08G025400	Ghir_A07G018410	Ghir_A13G010560	Ghir_A07G002460	Ghir_A03G005920	Ghir_A09G016210		Ghir_A06G011490	Ghir_A05G000530	Ghir_D13G003270	Ghir_A07G003070
	Ghir_A03G001520	Ghir_A07G007860	Ghir_D09G011380	Ghir_A08G025650	Ghir_A07G018680	Ghir_A13G011640	Ghir_A07G002490	Ghir_A03G006000	Ghir_A09G016500		Ghir_A06G011590	Ghir_A05G000580	Ghir_D13G004600	Ghir_A07G003430
	Ghir_A03G001780	Ghir_A07G008020	Ghir_D09G013420	Ghir_A09G000050	Ghir_A07G019540	Ghir_A13G012400	Ghir_A07G002950	Ghir_A03G006030	Ghir_A09G016570		Ghir_A06G011850	Ghir_A05G000750	Ghir_D13G005000	Ghir_A07G003460
	Ghir_A03G002310	Ghir_A07G008040	Ghir_D09G014650	Ghir_A09G001040	Ghir_A07G019550	Ghir_A13G013500	Ghir_A07G003070	Ghir_A03G006100	Ghir_A09G017280		Ghir_A06G011870	Ghir_A05G000800	Ghir_D13G006860	Ghir_A07G003660
	Ghir_A03G002440	Ghir_A07G008860	Ghir_D09G019970	Ghir_A09G001070	Ghir_A07G019890	Ghir_A13G013680	Ghir_A07G003420	Ghir_A03G006440	Ghir_A09G017580		Ghir_A06G012250	Ghir_A05G001340	Ghir_D13G007080	Ghir_A07G003830
	Ghir_A03G002480	Ghir_A07G009160	Ghir_D09G020990	Ghir_A09G002390	Ghir_A07G019990	Ghir_A13G013970	Ghir_A07G003460	Ghir_A03G006700	Ghir_A09G018060		Ghir_A06G012400	Ghir_A05G001520	Ghir_D13G007830	Ghir_A07G003860
	Ghir_A03G003020	Ghir_A07G009610	Ghir_D09G022020	Ghir_A09G002450	Ghir_A07G020890	Ghir_A13G014230	Ghir_A07G003660	Ghir_A03G006740	Ghir_A09G018170		Ghir_A06G012500	Ghir_A05G001530	Ghir_D13G010030	Ghir_A07G004170
	Ghir_A03G003210	Ghir_A07G009830	Ghir_D09G023820	Ghir_A09G002670	Ghir_A07G021330	Ghir_A13G015170	Ghir_A07G003830	Ghir_A03G006770	Ghir_A09G018870		Ghir_A06G014150	Ghir_A05G001600	Ghir_D13G014310	Ghir_A07G004530
	Ghir_A03G003520	Ghir_A07G009990	Ghir_D10G000260	Ghir_A09G003540	Ghir_A07G021760	Ghir_A13G015800	Ghir_A07G004170	Ghir_A03G006920	Ghir_A09G021100		Ghir_A06G014230	Ghir_A05G001740	Ghir_D13G015490	Ghir_A07G004580
	Ghir_A03G003720	Ghir_A07G010000	Ghir_D10G000330	Ghir_A09G004800	Ghir_A07G022030	Ghir_A13G016130	Ghir_A07G004530	Ghir_A03G006950	Ghir_A09G021230		Ghir_A06G014280	Ghir_A05G001770	Ghir_D13G016850	Ghir_A07G006650
	Ghir_A03G003780	Ghir_A07G010440	Ghir_D10G000560	Ghir_A09G005080	Ghir_A07G022310	Ghir_A13G016490	Ghir_A07G005220	Ghir_A03G007000	Ghir_A09G021410		Ghir_A06G014890	Ghir_A05G002000	Ghir_D13G017390	Ghir_A07G006690
	Ghir_A03G003880	Ghir_A07G011780	Ghir_D10G000660	Ghir_A09G005120	Ghir_A07G022560	Ghir_A13G018100	Ghir_A07G006120	Ghir_A03G007320	Ghir_A09G021520		Ghir_A06G015260	Ghir_A05G002010	Ghir_D13G020010	Ghir_A07G006990
	Ghir_A03G004170	Ghir_A07G011810	Ghir_D10G004870	Ghir_A09G006740	Ghir_A07G022770	Ghir_A13G018140	Ghir_A07G006380	Ghir_A03G007410	Ghir_A09G021890		Ghir_A06G015330	Ghir_A05G002070	Ghir_D13G021980	Ghir_A07G007120
	Ghir_A03G004380	Ghir_A07G012060	Ghir_D10G009100	Ghir_A09G008810	Ghir_A07G022920	Ghir_A13G020810	Ghir_A07G006650	Ghir_A03G007420	Ghir_A09G021930		Ghir_A06G015400	Ghir_A05G002100	Ghir_D13G023760	Ghir_A07G007360
	Ghir_A03G004430	Ghir_A07G012540	Ghir_D10G011360	Ghir_A09G008860	Ghir_A07G023310	Ghir_A13G022340	Ghir_A07G007080	Ghir_A03G007660	Ghir_A09G022500		Ghir_A06G015900	Ghir_A05G002510	Ghir_D13G024110	Ghir_A07G007530
	Ghir_A03G004520	Ghir_A07G012750	Ghir_D10G011640	Ghir_A09G010530	Ghir_A07G023490	Ghir_A13G022980	Ghir_A07G007520	Ghir_A03G007700	Ghir_A09G022920		Ghir_A06G015990	Ghir_A05G002590	Ghir_D13G024780	Ghir_A07G007920
	Ghir_A03G004560	Ghir_A07G013380	Ghir_D10G019660	Ghir_A09G011230	Ghir_A07G023820	Ghir_A13G024050	Ghir_A07G007530	Ghir_A03G007720	Ghir_A09G023000		Ghir_A06G016060	Ghir_A05G002990	Ghir_Scaffold2206G000020	Ghir_A07G008030
	Ghir_A03G004610	Ghir_A07G013600	Ghir_D10G021000	Ghir_A09G011790	Ghir_A07G023990	Ghir_A13G024560	Ghir_A07G007670	Ghir_A03G007820	Ghir_A09G023160		Ghir_A06G016080	Ghir_A05G003560	Ghir_Scaffold2206G000030	Ghir_A07G008880
	Ghir_A03G004620	Ghir_A07G013930	Ghir_D10G021540	Ghir_A09G012450	Ghir_A07G024140	Ghir_D01G001680	Ghir_A07G007850	Ghir_A03G008110	Ghir_A09G023600		Ghir_A06G016530	Ghir_A05G003760		Ghir_A07G009440
	Ghir_A03G004870	Ghir_A07G013950	Ghir_D10G025920	Ghir_A09G012690	Ghir_A07G024290	Ghir_D01G002120	Ghir_A07G007960	Ghir_A03G008140	Ghir_A09G023620		Ghir_A06G016890	Ghir_A05G004000		Ghir_A07G009530
	Ghir_A03G005190	Ghir_A07G014420	Ghir_D11G000450	Ghir_A09G012860	Ghir_A07G024990	Ghir_D01G003100	Ghir_A07G007970	Ghir_A03G008190	Ghir_A09G023700		Ghir_A06G016940	Ghir_A05G004050		Ghir_A07G010090
	Ghir_A03G005200	Ghir_A07G014740	Ghir_D11G001250	Ghir_A09G013240	Ghir_A07G025040	Ghir_D01G003680	Ghir_A07G007990	Ghir_A03G008260	Ghir_A09G024420		Ghir_A06G017420	Ghir_A05G004290		Ghir_A07G010440
	Ghir_A03G005400	Ghir_A07G016650	Ghir_D11G002520	Ghir_A09G014700	Ghir_A08G001170	Ghir_D01G005460	Ghir_A07G008050	Ghir_A03G008880	Ghir_A10G000530		Ghir_A06G018150	Ghir_A05G004460		Ghir_A07G010490
	Ghir_A03G005420	Ghir_A07G017140	Ghir_D11G006930	Ghir_A09G014740	Ghir_A08G001620	Ghir_D01G005930	Ghir_A07G009440	Ghir_A03G008930	Ghir_A10G002610		Ghir_A06G018830	Ghir_A05G004510		Ghir_A07G011570
	Ghir_A03G005660	Ghir_A07G017180	Ghir_D11G008010	Ghir_A09G015500	Ghir_A08G002320	Ghir_D01G007470	Ghir_A07G009530	Ghir_A03G008940	Ghir_A10G002720		Ghir_A06G019140	Ghir_A05G004540		Ghir_A07G011590
	Ghir_A03G005720	Ghir_A07G017430	Ghir_D11G008190	Ghir_A09G016230	Ghir_A08G002620	Ghir_D01G007900	Ghir_A07G010090	Ghir_A03G009840	Ghir_A10G003030		Ghir_A06G019530	Ghir_A05G004760		Ghir_A07G011770
	Ghir_A03G005920	Ghir_A07G018020	Ghir_D11G008660	Ghir_A09G016850	Ghir_A08G003070	Ghir_D01G008070	Ghir_A07G010490	Ghir_A03G009910	Ghir_A10G003740		Ghir_A06G019660	Ghir_A05G005080		Ghir_A07G011780
	Ghir_A03G006000	Ghir_A07G018050	Ghir_D11G009110	Ghir_A09G017690	Ghir_A08G004090	Ghir_D01G008140	Ghir_A07G011570	Ghir_A03G010090	Ghir_A10G004040		Ghir_A06G019710	Ghir_A05G005440		Ghir_A07G011850
	Ghir_A03G006030	Ghir_A07G018490	Ghir_D11G009990	Ghir_A09G018340	Ghir_A08G004520	Ghir_D01G009760	Ghir_A07G011590	Ghir_A03G010340	Ghir_A10G004410		Ghir_A06G019740	Ghir_A05G005470		Ghir_A07G011970
	Ghir_A03G006100	Ghir_A07G020030	Ghir_D11G011780	Ghir_A09G019230	Ghir_A08G004680	Ghir_D01G010420	Ghir_A07G011970	Ghir_A03G011220	Ghir_A10G004620		Ghir_A06G019770	Ghir_A05G005510		Ghir_A07G012430
	Ghir_A03G006400	Ghir_A07G020490	Ghir_D11G013260	Ghir_A09G019300	Ghir_A08G004920	Ghir_D01G010810	Ghir_A07G012430	Ghir_A03G011320	Ghir_A10G006610		Ghir_A06G020170	Ghir_A05G005780		Ghir_A07G012710
	Ghir_A03G006440	Ghir_A07G021200	Ghir_D11G018630	Ghir_A09G019400	Ghir_A08G005160	Ghir_D01G013020	Ghir_A07G012710	Ghir_A03G011430	Ghir_A10G007820		Ghir_A06G020470	Ghir_A05G005810		Ghir_A07G013330
	Ghir_A03G006700	Ghir_A07G021370	Ghir_D11G020130	Ghir_A09G019860	Ghir_A08G007250	Ghir_D01G015110	Ghir_A07G012920	Ghir_A03G011510	Ghir_A10G009560		Ghir_A06G020760	Ghir_A05G005930		Ghir_A07G013910
	Ghir_A03G006740	Ghir_A07G021380	Ghir_D11G021180	Ghir_A09G020010	Ghir_A08G007430	Ghir_D01G015670	Ghir_A07G013710	Ghir_A03G011770	Ghir_A10G010170		Ghir_A06G020780	Ghir_A05G006190		Ghir_A07G014530
	Ghir_A03G006770	Ghir_A07G021640	Ghir_D11G021470	Ghir_A09G021090	Ghir_A08G007500	Ghir_D01G016010	Ghir_A07G014530	Ghir_A03G011810	Ghir_A10G010630		Ghir_A06G020850	Ghir_A05G006260		Ghir_A07G014860
	Ghir_A03G006920	Ghir_A07G022820	Ghir_D11G022130	Ghir_A09G021200	Ghir_A08G007650	Ghir_D01G016270	Ghir_A07G015280	Ghir_A03G011990	Ghir_A10G013200		Ghir_A06G020880	Ghir_A05G006450		Ghir_A07G016070
	Ghir_A03G006950	Ghir_A07G023140	Ghir_D11G023460	Ghir_A09G021350	Ghir_A08G008530	Ghir_D01G016580	Ghir_A07G015420	Ghir_A03G012210	Ghir_A10G013430		Ghir_A06G021070	Ghir_A05G006560		Ghir_A07G016110
	Ghir_A03G007000	Ghir_A07G023430	Ghir_D11G023520	Ghir_A09G021690	Ghir_A08G008990	Ghir_D01G017220	Ghir_A07G016070	Ghir_A03G012230	Ghir_A10G014650		Ghir_A06G021510	Ghir_A05G006650		Ghir_A07G016700
	Ghir_A03G007320	Ghir_A07G023640	Ghir_D11G026680	Ghir_A09G021870	Ghir_A08G009330	Ghir_D01G018890	Ghir_A07G016110	Ghir_A03G012390	Ghir_A10G014860		Ghir_A06G022160	Ghir_A05G006770		Ghir_A07G017300
	Ghir_A03G007360	Ghir_A07G024430	Ghir_D11G028610	Ghir_A09G022100	Ghir_A08G009450	Ghir_D01G019030	Ghir_A07G016180	Ghir_A03G012520	Ghir_A10G015450		Ghir_A06G022640	Ghir_A05G006840		Ghir_A07G017320
	Ghir_A03G007410	Ghir_A07G024580	Ghir_D11G031730	Ghir_A09G022500	Ghir_A08G009590	Ghir_D01G022190	Ghir_A07G016260	Ghir_A03G012910	Ghir_A10G016790		Ghir_A07G000290	Ghir_A05G006900		Ghir_A07G017390
	Ghir_A03G007420	Ghir_A08G000070	Ghir_D11G032020	Ghir_A09G022590	Ghir_A08G009790	Ghir_D01G022210	Ghir_A07G016700	Ghir_A03G013020	Ghir_A10G017480		Ghir_A07G000300	Ghir_A05G007030		Ghir_A07G017520
	Ghir_A03G007580	Ghir_A08G000150	Ghir_D11G034480	Ghir_A09G022750	Ghir_A08G009820	Ghir_D01G022540	Ghir_A07G016750	Ghir_A03G013050	Ghir_A10G017500		Ghir_A07G000610	Ghir_A05G007220		Ghir_A07G017530
	Ghir_A03G007660	Ghir_A08G000870	Ghir_D11G035560	Ghir_A09G022870	Ghir_A08G010990	Ghir_D02G001380	Ghir_A07G017390	Ghir_A03G013370	Ghir_A10G017510		Ghir_A07G000980	Ghir_A05G007310		Ghir_A07G017540
	Ghir_A03G007700	Ghir_A08G000990	Ghir_D11G035880	Ghir_A09G022900	Ghir_A08G011060	Ghir_D02G001910	Ghir_A07G017600	Ghir_A03G013700	Ghir_A10G019000		Ghir_A07G001070	Ghir_A05G007320		Ghir_A07G017600
	Ghir_A03G007720	Ghir_A08G001000	Ghir_D11G036320	Ghir_A09G023040	Ghir_A08G011260	Ghir_D02G003450	Ghir_A07G017610	Ghir_A03G014270	Ghir_A10G019080		Ghir_A07G001110	Ghir_A05G007360		Ghir_A07G017870
	Ghir_A03G007840	Ghir_A08G001080	Ghir_D12G000910	Ghir_A09G024670	Ghir_A08G011550	Ghir_D02G003510	Ghir_A07G017870	Ghir_A03G014660	Ghir_A10G020020		Ghir_A07G001590	Ghir_A05G007540		Ghir_A07G018360
	Ghir_A03G008190	Ghir_A08G001650	Ghir_D12G001610	Ghir_A09G025840	Ghir_A08G011830	Ghir_D02G004210	Ghir_A07G018730	Ghir_A03G014670	Ghir_A10G020070		Ghir_A07G001680	Ghir_A05G007550		Ghir_A07G018990
	Ghir_A03G008260	Ghir_A08G001810	Ghir_D12G002780	Ghir_A10G000870	Ghir_A08G011930	Ghir_D02G005390	Ghir_A07G019120	Ghir_A03G014830	Ghir_A10G020670		Ghir_A07G002210	Ghir_A05G007570		Ghir_A07G019220
	Ghir_A03G008410	Ghir_A08G002520	Ghir_D12G004360	Ghir_A10G000950	Ghir_A08G012720	Ghir_D02G005410	Ghir_A07G019220	Ghir_A03G015090	Ghir_A10G021440		Ghir_A07G002380	Ghir_A05G007720		Ghir_A07G019310
	Ghir_A03G008540	Ghir_A08G002940	Ghir_D12G004540	Ghir_A10G003340	Ghir_A08G013190	Ghir_D02G006030	Ghir_A07G019310	Ghir_A03G015410	Ghir_A10G022440		Ghir_A07G002490	Ghir_A05G007850		Ghir_A07G019350
	Ghir_A03G008650	Ghir_A08G003130	Ghir_D12G005440	Ghir_A10G003400	Ghir_A08G013420	Ghir_D02G006190	Ghir_A07G019350	Ghir_A03G015430	Ghir_A10G022550		Ghir_A07G003490	Ghir_A05G007970		Ghir_A07G021320
	Ghir_A03G008670	Ghir_A08G003340	Ghir_D12G007320	Ghir_A10G003580	Ghir_A08G013590	Ghir_D02G009090	Ghir_A07G019400	Ghir_A03G015530	Ghir_A10G023320		Ghir_A07G006120	Ghir_A05G008210		Ghir_A07G021350
	Ghir_A03G008930	Ghir_A08G003770	Ghir_D12G008820	Ghir_A10G004120	Ghir_A08G013730	Ghir_D02G011760	Ghir_A07G020320	Ghir_A03G015630	Ghir_A10G024470		Ghir_A07G006470	Ghir_A05G008320		Ghir_A07G021390
	Ghir_A03G008940	Ghir_A08G004470	Ghir_D12G008840	Ghir_A10G005530	Ghir_A08G013770	Ghir_D02G012620	Ghir_A07G020610	Ghir_A03G015650	Ghir_A11G000660		Ghir_A07G006480	Ghir_A05G008360		Ghir_A07G021550
	Ghir_A03G009760	Ghir_A08G004500	Ghir_D12G012140	Ghir_A10G005750	Ghir_A08G014060	Ghir_D02G015420	Ghir_A07G021180	Ghir_A03G015800	Ghir_A11G001750		Ghir_A07G006580	Ghir_A05G008410		Ghir_A07G022300
	Ghir_A03G009910	Ghir_A08G004750	Ghir_D12G012280	Ghir_A10G006610	Ghir_A08G014350	Ghir_D02G015440	Ghir_A07G021270	Ghir_A03G015920	Ghir_A11G002430		Ghir_A07G006600	Ghir_A05G008700		Ghir_A07G022590
	Ghir_A03G010080	Ghir_A08G005240	Ghir_D12G013000	Ghir_A10G006750	Ghir_A08G014760	Ghir_D02G016070	Ghir_A07G021350	Ghir_A03G015950	Ghir_A11G003230		Ghir_A07G007080	Ghir_A05G008860		Ghir_A07G022820
	Ghir_A03G010090	Ghir_A08G005490	Ghir_D12G014870	Ghir_A10G007050	Ghir_A08G015930	Ghir_D02G017270	Ghir_A07G021490	Ghir_A03G016050	Ghir_A11G003380		Ghir_A07G007100	Ghir_A05G008900		Ghir_A07G023220
	Ghir_A03G011120	Ghir_A08G005550	Ghir_D12G016140	Ghir_A10G007150	Ghir_A08G016180	Ghir_D02G017440	Ghir_A07G021550	Ghir_A03G016140	Ghir_A11G003720		Ghir_A07G007300	Ghir_A05G008990		Ghir_A07G023300
	Ghir_A03G011210	Ghir_A08G005760	Ghir_D12G017500	Ghir_A10G007580	Ghir_A08G016260	Ghir_D02G017810	Ghir_A07G022290	Ghir_A03G016160	Ghir_A11G004090		Ghir_A07G007520	Ghir_A05G009090		Ghir_A07G023410
	Ghir_A03G011320	Ghir_A08G005810	Ghir_D12G020330	Ghir_A10G008690	Ghir_A08G016390	Ghir_D02G018090	Ghir_A07G022300	Ghir_A03G016220	Ghir_A11G004110		Ghir_A07G007770	Ghir_A05G009280		Ghir_A07G023430
	Ghir_A03G011350	Ghir_A08G006070	Ghir_D12G021840	Ghir_A10G010020	Ghir_A08G017020	Ghir_D02G019770	Ghir_A07G022590	Ghir_A03G016360	Ghir_A11G004120		Ghir_A07G007950	Ghir_A05G009730		Ghir_A07G023640
	Ghir_A03G011400	Ghir_A08G006290	Ghir_D12G021930	Ghir_A10G011200	Ghir_A08G017520	Ghir_D02G020080	Ghir_A07G022980	Ghir_A03G016400	Ghir_A11G004500		Ghir_A07G007980	Ghir_A05G009740		Ghir_A07G023710
	Ghir_A03G011430	Ghir_A08G006300	Ghir_D12G022020	Ghir_A10G011380	Ghir_A08G017570	Ghir_D02G020210	Ghir_A07G023220	Ghir_A03G016530	Ghir_A11G004550		Ghir_A07G008010	Ghir_A05G009750		Ghir_A07G024350
	Ghir_A03G011770	Ghir_A08G006800	Ghir_D12G023250	Ghir_A10G011930	Ghir_A08G017800	Ghir_D02G022620	Ghir_A07G023410	Ghir_A03G016550	Ghir_A11G004640		Ghir_A07G008020	Ghir_A05G009960		Ghir_A07G024430
	Ghir_A03G011810	Ghir_A08G007260	Ghir_D12G024580	Ghir_A10G011980	Ghir_A08G018560	Ghir_D02G023330	Ghir_A07G023450	Ghir_A03G016590	Ghir_A11G004710		Ghir_A07G008100	Ghir_A05G010030		Ghir_A07G024580
	Ghir_A03G011990	Ghir_A08G007420	Ghir_D12G027400	Ghir_A10G013800	Ghir_A08G018760	Ghir_D02G023600	Ghir_A07G023630	Ghir_A03G016750	Ghir_A11G006010		Ghir_A07G009160	Ghir_A05G010040		Ghir_A07G024630
	Ghir_A03G012210	Ghir_A08G007540	Ghir_D12G028590	Ghir_A10G013900	Ghir_A08G019490	Ghir_D02G023740	Ghir_A07G023710	Ghir_A03G016890	Ghir_A11G006270		Ghir_A07G010540	Ghir_A05G010440		Ghir_A08G000070
	Ghir_A03G012220	Ghir_A08G008940	Ghir_D12G029320	Ghir_A10G013960	Ghir_A08G019500	Ghir_D03G000120	Ghir_A07G024190	Ghir_A03G016960	Ghir_A11G006540		Ghir_A07G010870	Ghir_A05G010520		Ghir_A08G001070
	Ghir_A03G012390	Ghir_A08G009020	Ghir_D13G000980	Ghir_A10G015180	Ghir_A08G019540	Ghir_D03G000700	Ghir_A07G024250	Ghir_A03G017010	Ghir_A11G006690		Ghir_A07G011180	Ghir_A05G011080		Ghir_A08G001080
	Ghir_A03G012520	Ghir_A08G011150	Ghir_D13G001070	Ghir_A10G015190	Ghir_A08G019780	Ghir_D03G002560	Ghir_A07G024350	Ghir_A03G017030	Ghir_A11G008270		Ghir_A07G011270	Ghir_A05G011910		Ghir_A08G001520
	Ghir_A03G012840	Ghir_A08G011400	Ghir_D13G001910	Ghir_A10G016110	Ghir_A08G020430	Ghir_D03G002570	Ghir_A07G024630	Ghir_A03G017130	Ghir_A11G008650		Ghir_A07G013320	Ghir_A05G011940		Ghir_A08G001850
	Ghir_A03G012890	Ghir_A08G012250	Ghir_D13G003510	Ghir_A10G016140	Ghir_A08G021430	Ghir_D03G002670	Ghir_A08G001070	Ghir_A03G017220	Ghir_A11G009120		Ghir_A07G013710	Ghir_A05G012180		Ghir_A08G002380
	Ghir_A03G012910	Ghir_A08G012280	Ghir_D13G005020	Ghir_A10G016670	Ghir_A08G021730	Ghir_D03G003640	Ghir_A08G001190	Ghir_A03G017240	Ghir_A11G009640		Ghir_A07G014110	Ghir_A05G012290		Ghir_A08G002460
	Ghir_A03G013020	Ghir_A08G012560	Ghir_D13G005080	Ghir_A10G016790	Ghir_A08G021830	Ghir_D03G004180	Ghir_A08G001850	Ghir_A03G017250	Ghir_A11G009750		Ghir_A07G014500	Ghir_A05G012330		Ghir_A08G002520
	Ghir_A03G013050	Ghir_A08G012930	Ghir_D13G007140	Ghir_A10G016920	Ghir_A08G022200	Ghir_D03G004460	Ghir_A08G002380	Ghir_A03G017450	Ghir_A11G009870		Ghir_A07G015280	Ghir_A05G012340		Ghir_A08G003130
	Ghir_A03G013150	Ghir_A08G013620	Ghir_D13G007700	Ghir_A10G017140	Ghir_A08G022660	Ghir_D03G004960	Ghir_A08G002460	Ghir_A03G017610	Ghir_A11G010260		Ghir_A07G015940	Ghir_A05G012480		Ghir_A08G003430
	Ghir_A03G013260	Ghir_A08G014520	Ghir_D13G007770	Ghir_A10G018290	Ghir_A08G022900	Ghir_D03G006360	Ghir_A08G002590	Ghir_A03G017720	Ghir_A11G012220		Ghir_A07G016260	Ghir_A05G013180		Ghir_A08G003920
	Ghir_A03G013940	Ghir_A08G014570	Ghir_D13G010850	Ghir_A10G018560	Ghir_A08G023120	Ghir_D03G010280	Ghir_A08G002810	Ghir_A03G017790	Ghir_A11G012330		Ghir_A07G016580	Ghir_A05G013280		Ghir_A08G004240
	Ghir_A03G014050	Ghir_A08G014700	Ghir_D13G010890	Ghir_A10G020130	Ghir_A08G023390	Ghir_D03G010460	Ghir_A08G003000	Ghir_A03G017860	Ghir_A11G013160		Ghir_A07G016870	Ghir_A05G013450		Ghir_A08G004650
	Ghir_A03G014270	Ghir_A08G015000	Ghir_D13G011920	Ghir_A10G020260	Ghir_A08G023570	Ghir_D03G010720	Ghir_A08G003430	Ghir_A03G017970	Ghir_A11G013170		Ghir_A07G017130	Ghir_A05G013520		Ghir_A08G004670
	Ghir_A03G014470	Ghir_A08G015020	Ghir_D13G013030	Ghir_A10G020810	Ghir_A08G024030	Ghir_D03G010910	Ghir_A08G003920	Ghir_A03G018110	Ghir_A11G013230		Ghir_A07G017610	Ghir_A05G013570		Ghir_A08G005120
	Ghir_A03G014530	Ghir_A08G015720	Ghir_D13G013520	Ghir_A10G021070	Ghir_A08G024170	Ghir_D03G011030	Ghir_A08G004150	Ghir_A03G018130	Ghir_A11G013240		Ghir_A07G017850	Ghir_A05G013690		Ghir_A08G005510
	Ghir_A03G014660	Ghir_A08G016210	Ghir_D13G014320	Ghir_A10G021270	Ghir_A08G024350	Ghir_D03G012680	Ghir_A08G004190	Ghir_A03G018240	Ghir_A11G013260		Ghir_A07G018020	Ghir_A05G013800		Ghir_A08G005640
	Ghir_A03G014670	Ghir_A08G016630	Ghir_D13G015160	Ghir_A10G021680	Ghir_A08G024890	Ghir_D03G014890	Ghir_A08G004240	Ghir_A03G018490	Ghir_A11G015140		Ghir_A07G018860	Ghir_A05G013960		Ghir_A08G006290
	Ghir_A03G014830	Ghir_A08G016780	Ghir_D13G015810	Ghir_A10G022810	Ghir_A08G024940	Ghir_D03G016650	Ghir_A08G004650	Ghir_A03G018990	Ghir_A11G015210		Ghir_A07G018900	Ghir_A05G014250		Ghir_A08G006300
	Ghir_A03G014920	Ghir_A08G017030	Ghir_D13G016330	Ghir_A10G023130	Ghir_A08G025670	Ghir_D03G018300	Ghir_A08G004670	Ghir_A03G019360	Ghir_A11G016140		Ghir_A07G019120	Ghir_A05G014340		Ghir_A08G006630
	Ghir_A03G014940	Ghir_A08G018060	Ghir_D13G016390	Ghir_A11G000360	Ghir_A08G026120	Ghir_D03G019010	Ghir_A08G005120	Ghir_A03G019950	Ghir_A11G016230		Ghir_A07G020610	Ghir_A05G014480		Ghir_A08G007610
	Ghir_A03G015090	Ghir_A08G018380	Ghir_D13G017240	Ghir_A11G000670	Ghir_A09G000460	Ghir_D04G004000	Ghir_A08G005640	Ghir_A03G020110	Ghir_A11G016260		Ghir_A07G021010	Ghir_A05G014560		Ghir_A08G008110
	Ghir_A03G015430	Ghir_A08G018720	Ghir_D13G018590	Ghir_A11G001580	Ghir_A09G000810	Ghir_D04G004650	Ghir_A08G006080	Ghir_A03G020440	Ghir_A11G016700		Ghir_A07G021180	Ghir_A05G014600		Ghir_A08G008150
	Ghir_A03G015490	Ghir_A08G018880	Ghir_D13G020300	Ghir_A11G001740	Ghir_A09G000890	Ghir_D04G004690	Ghir_A08G006100	Ghir_A03G020480	Ghir_A11G018140		Ghir_A07G021270	Ghir_A05G014740		Ghir_A08G010110
	Ghir_A03G015630	Ghir_A08G018900	Ghir_D13G021620	Ghir_A11G001850	Ghir_A09G000920	Ghir_D04G005220	Ghir_A08G006280	Ghir_A03G020490	Ghir_A11G018150		Ghir_A07G021490	Ghir_A05G014960		Ghir_A08G010360
	Ghir_A03G015650	Ghir_A08G019210	Ghir_D13G021660	Ghir_A11G002250	Ghir_A09G001130	Ghir_D04G006160	Ghir_A08G007960	Ghir_A03G020600	Ghir_A11G018410		Ghir_A07G021940	Ghir_A05G015050		Ghir_A08G010390
	Ghir_A03G015710	Ghir_A08G020330	Ghir_D13G022300	Ghir_A11G002570	Ghir_A09G001250	Ghir_D04G006460	Ghir_A08G008150	Ghir_A03G020610	Ghir_A11G018580		Ghir_A07G022180	Ghir_A05G015060		Ghir_A08G011030
	Ghir_A03G015800	Ghir_A08G021070	Ghir_D13G024810	Ghir_A11G002980	Ghir_A09G002350	Ghir_D04G006920	Ghir_A08G008700	Ghir_A03G020740	Ghir_A11G018820		Ghir_A07G022540	Ghir_A05G015300		Ghir_A08G011270
	Ghir_A03G016050	Ghir_A08G021250	Ghir_D13G025400	Ghir_A11G003020	Ghir_A09G002640	Ghir_D04G007090	Ghir_A08G009140	Ghir_A03G020980	Ghir_A11G019510		Ghir_A07G022980	Ghir_A05G015590		Ghir_A08G011400
	Ghir_A03G016140	Ghir_A08G021530	Ghir_Scaffold3335G000040	Ghir_A11G003380	Ghir_A09G004400	Ghir_D04G007130	Ghir_A08G009440	Ghir_A03G021030	Ghir_A11G019540		Ghir_A07G023330	Ghir_A05G015670		Ghir_A08G012560
	Ghir_A03G016160	Ghir_A08G021620	Ghir_Scaffold423G000140	Ghir_A11G003820	Ghir_A09G004540	Ghir_D04G007200	Ghir_A08G009480	Ghir_A03G021210	Ghir_A11G020120		Ghir_A07G023630	Ghir_A05G016550		Ghir_A08G012870
	Ghir_A03G016220	Ghir_A08G021700		Ghir_A11G004460	Ghir_A09G004660	Ghir_D04G007810	Ghir_A08G009780	Ghir_A03G021380	Ghir_A11G020390		Ghir_A07G023980	Ghir_A05G016590		Ghir_A08G012930
	Ghir_A03G016250	Ghir_A08G021760		Ghir_A11G006030	Ghir_A09G004820	Ghir_D04G011600	Ghir_A08G009890	Ghir_A03G021720	Ghir_A11G020420		Ghir_A07G024250	Ghir_A05G017000		Ghir_A08G012950
	Ghir_A03G016290	Ghir_A08G022040		Ghir_A11G006130	Ghir_A09G004850	Ghir_D04G012180	Ghir_A08G010110	Ghir_A03G021790	Ghir_A11G021060		Ghir_A07G024310	Ghir_A05G017180		Ghir_A08G013370
	Ghir_A03G016400	Ghir_A08G022940		Ghir_A11G006680	Ghir_A09G005280	Ghir_D04G013570	Ghir_A08G010390	Ghir_A03G022150	Ghir_A11G023290		Ghir_A07G025130	Ghir_A05G017250		Ghir_A08G013660
	Ghir_A03G016510	Ghir_A08G023930		Ghir_A11G006690	Ghir_A09G005980	Ghir_D04G014120	Ghir_A08G010410	Ghir_A03G022200	Ghir_A11G023420		Ghir_A08G000150	Ghir_A05G017510		Ghir_A08G013690
	Ghir_A03G016530	Ghir_A08G024000		Ghir_A11G006890	Ghir_A09G006150	Ghir_D04G015890	Ghir_A08G011270	Ghir_A03G022280	Ghir_A11G024560		Ghir_A08G000380	Ghir_A05G017580		Ghir_A08G014320
	Ghir_A03G016630	Ghir_A08G024670		Ghir_A11G007030	Ghir_A09G006390	Ghir_D04G016790	Ghir_A08G012000	Ghir_A03G022300	Ghir_A11G025120		Ghir_A08G000390	Ghir_A05G017780		Ghir_A08G014700
	Ghir_A03G016750	Ghir_A08G025060		Ghir_A11G007580	Ghir_A09G006720	Ghir_D04G017280	Ghir_A08G012350	Ghir_A03G022390	Ghir_A11G025280		Ghir_A08G000930	Ghir_A05G017890		Ghir_A08G014910
	Ghir_A03G016890	Ghir_A08G025420		Ghir_A11G008040	Ghir_A09G007440	Ghir_D04G017970	Ghir_A08G012950	Ghir_A03G022410	Ghir_A11G025510		Ghir_A08G001650	Ghir_A05G018130		Ghir_A08G015330
	Ghir_A03G016960	Ghir_A08G025760		Ghir_A11G008100	Ghir_A09G007590	Ghir_D04G018690	Ghir_A08G013780	Ghir_A03G022470	Ghir_A11G025560		Ghir_A08G002300	Ghir_A05G018190		Ghir_A08G015510
	Ghir_A03G017010	Ghir_A08G026320		Ghir_A11G008240	Ghir_A09G007640	Ghir_D04G020480	Ghir_A08G014320	Ghir_A03G022640	Ghir_A11G027120		Ghir_A08G002440	Ghir_A05G018750		Ghir_A08G015590
	Ghir_A03G017030	Ghir_A09G000100		Ghir_A11G008320	Ghir_A09G007730	Ghir_D05G001630	Ghir_A08G015510	Ghir_A03G022660	Ghir_A11G027450		Ghir_A08G002570	Ghir_A05G018890		Ghir_A08G015800
	Ghir_A03G017130	Ghir_A09G001400		Ghir_A11G008470	Ghir_A09G008000	Ghir_D05G003650	Ghir_A08G015590	Ghir_A03G022740	Ghir_A11G028070		Ghir_A08G002590	Ghir_A05G018930		Ghir_A08G016290
	Ghir_A03G017240	Ghir_A09G002240		Ghir_A11G009130	Ghir_A09G008100	Ghir_D05G004560	Ghir_A08G015800	Ghir_A03G022780	Ghir_A11G028750		Ghir_A08G002910	Ghir_A05G019490		Ghir_A08G016440
	Ghir_A03G017290	Ghir_A09G002490		Ghir_A11G009870	Ghir_A09G008230	Ghir_D05G005400	Ghir_A08G016860	Ghir_A03G022920	Ghir_A11G029950		Ghir_A08G003000	Ghir_A05G019510		Ghir_A08G016810
	Ghir_A03G017450	Ghir_A09G002840		Ghir_A11G010750	Ghir_A09G009040	Ghir_D05G005520	Ghir_A08G017090	Ghir_A03G022930	Ghir_A11G029990		Ghir_A08G003230	Ghir_A05G019770		Ghir_A08G017030
	Ghir_A03G017610	Ghir_A09G002980		Ghir_A11G010870	Ghir_A09G009270	Ghir_D05G005810	Ghir_A08G017320	Ghir_A03G022950	Ghir_A11G030560		Ghir_A08G003340	Ghir_A05G019800		Ghir_A08G017090
	Ghir_A03G017720	Ghir_A09G003040		Ghir_A11G012260	Ghir_A09G009380	Ghir_D05G006110	Ghir_A08G017410	Ghir_A03G023010	Ghir_A11G031770		Ghir_A08G003360	Ghir_A05G019960		Ghir_A08G018080
	Ghir_A03G017790	Ghir_A09G003520		Ghir_A11G013820	Ghir_A09G009750	Ghir_D05G006140	Ghir_A08G017900	Ghir_A03G023030	Ghir_A11G033000		Ghir_A08G003580	Ghir_A05G020380		Ghir_A08G018340
	Ghir_A03G017970	Ghir_A09G003900		Ghir_A11G014240	Ghir_A09G010100	Ghir_D05G008420	Ghir_A08G018080	Ghir_A03G023320	Ghir_A11G033470		Ghir_A08G004150	Ghir_A05G020470		Ghir_A08G018640
	Ghir_A03G018110	Ghir_A09G005520		Ghir_A11G015260	Ghir_A09G010500	Ghir_D05G009540	Ghir_A08G018230	Ghir_A03G023640	Ghir_A11G033900		Ghir_A08G004250	Ghir_A05G020540		Ghir_A08G018720
	Ghir_A03G018240	Ghir_A09G005720		Ghir_A11G017630	Ghir_A09G010670	Ghir_D05G009710	Ghir_A08G018340	Ghir_A03G023770	Ghir_A11G035060		Ghir_A08G005050	Ghir_A05G021060		Ghir_A08G019020
	Ghir_A03G018260	Ghir_A09G005860		Ghir_A11G017670	Ghir_A09G011820	Ghir_D05G010350	Ghir_A08G018830	Ghir_A03G023820	Ghir_A11G035140		Ghir_A08G005800	Ghir_A05G021160		Ghir_A08G019410
	Ghir_A03G018450	Ghir_A09G006370		Ghir_A11G018140	Ghir_A09G012170	Ghir_D05G010640	Ghir_A08G019020	Ghir_A03G023890	Ghir_A11G035490		Ghir_A08G006070	Ghir_A05G021180		Ghir_A08G019580
	Ghir_A03G018490	Ghir_A09G006950		Ghir_A11G018280	Ghir_A09G012210	Ghir_D05G011320	Ghir_A08G019410	Ghir_A04G000130	Ghir_A12G001170		Ghir_A08G006270	Ghir_A05G021280		Ghir_A08G020050
	Ghir_A03G018540	Ghir_A09G007110		Ghir_A11G018310	Ghir_A09G012520	Ghir_D05G011430	Ghir_A08G019580	Ghir_A04G000260	Ghir_A12G001740		Ghir_A08G007420	Ghir_A05G021330		Ghir_A08G020200
	Ghir_A03G018620	Ghir_A09G007260		Ghir_A11G018390	Ghir_A09G012720	Ghir_D05G012390	Ghir_A08G019690	Ghir_A04G000330	Ghir_A12G002180		Ghir_A08G008100	Ghir_A05G021620		Ghir_A08G021050
	Ghir_A03G018840	Ghir_A09G007720		Ghir_A11G018660	Ghir_A09G013610	Ghir_D05G013540	Ghir_A08G019700	Ghir_A04G000360	Ghir_A12G002580		Ghir_A08G008720	Ghir_A05G022220		Ghir_A08G021070
	Ghir_A03G019360	Ghir_A09G008580		Ghir_A11G018820	Ghir_A09G014130	Ghir_D05G013880	Ghir_A08G019750	Ghir_A04G000400	Ghir_A12G002590		Ghir_A08G009140	Ghir_A05G022470		Ghir_A08G021760
	Ghir_A03G019390	Ghir_A09G009010		Ghir_A11G019210	Ghir_A09G014760	Ghir_D05G014450	Ghir_A08G019850	Ghir_A04G000560	Ghir_A12G002620		Ghir_A08G009440	Ghir_A05G022560		Ghir_A08G021900
	Ghir_A03G019710	Ghir_A09G009030		Ghir_A11G019540	Ghir_A09G015180	Ghir_D05G015610	Ghir_A08G020050	Ghir_A04G000680	Ghir_A12G003370		Ghir_A08G009480	Ghir_A05G022850		Ghir_A08G022630
	Ghir_A03G019850	Ghir_A09G009650		Ghir_A11G019780	Ghir_A09G015330	Ghir_D05G016470	Ghir_A08G020200	Ghir_A04G000690	Ghir_A12G004030		Ghir_A08G009510	Ghir_A05G022940		Ghir_A08G023220
	Ghir_A03G019950	Ghir_A09G009910		Ghir_A11G020100	Ghir_A09G015490	Ghir_D05G016510	Ghir_A08G021050	Ghir_A04G000700	Ghir_A12G004850		Ghir_A08G009780	Ghir_A05G023300		Ghir_A08G024000
	Ghir_A03G020110	Ghir_A09G010110		Ghir_A11G020840	Ghir_A09G016020	Ghir_D05G017210	Ghir_A08G021470	Ghir_A04G000940	Ghir_A12G006280		Ghir_A08G009890	Ghir_A05G023450		Ghir_A08G024200
	Ghir_A03G020480	Ghir_A09G010200		Ghir_A11G021080	Ghir_A09G016140	Ghir_D05G018030	Ghir_A08G021900	Ghir_A04G001030	Ghir_A12G006810		Ghir_A08G011420	Ghir_A05G023550		Ghir_A08G024260
	Ghir_A03G020490	Ghir_A09G010600		Ghir_A11G021390	Ghir_A09G017330	Ghir_D05G019540	Ghir_A08G022370	Ghir_A04G001070	Ghir_A12G008800		Ghir_A08G011720	Ghir_A05G023650		Ghir_A08G024580
	Ghir_A03G020500	Ghir_A09G011640		Ghir_A11G021570	Ghir_A09G017350	Ghir_D05G020190	Ghir_A08G022640	Ghir_A04G001090	Ghir_A12G009070		Ghir_A08G012000	Ghir_A05G023670		Ghir_A08G025060
	Ghir_A03G020600	Ghir_A09G011800		Ghir_A11G021950	Ghir_A09G017610	Ghir_D05G020350	Ghir_A08G022810	Ghir_A04G001360	Ghir_A12G009080		Ghir_A08G012040	Ghir_A05G023690		Ghir_A08G025200
	Ghir_A03G020610	Ghir_A09G012460		Ghir_A11G022070	Ghir_A09G017800	Ghir_D05G020420	Ghir_A08G023220	Ghir_A04G001820	Ghir_A12G009180		Ghir_A08G012350	Ghir_A05G023860		Ghir_A08G026100
	Ghir_A03G020900	Ghir_A09G012470		Ghir_A11G022260	Ghir_A09G017850	Ghir_D05G021070	Ghir_A08G024580	Ghir_A04G001930	Ghir_A12G009240		Ghir_A08G012670	Ghir_A05G023940		Ghir_A08G026160
	Ghir_A03G020980	Ghir_A09G012600		Ghir_A11G022960	Ghir_A09G018410	Ghir_D05G022140	Ghir_A08G025200	Ghir_A04G002220	Ghir_A12G009460		Ghir_A08G012690	Ghir_A05G025090		Ghir_A08G026230
	Ghir_A03G021790	Ghir_A09G013010		Ghir_A11G023420	Ghir_A09G018830	Ghir_D05G022390	Ghir_A08G025240	Ghir_A04G002530	Ghir_A12G011610		Ghir_A08G013600	Ghir_A05G025640		Ghir_A08G026730
	Ghir_A03G021850	Ghir_A09G013060		Ghir_A11G023630	Ghir_A09G019010	Ghir_D05G023560	Ghir_A08G025560	Ghir_A04G002610	Ghir_A12G012240		Ghir_A08G015030	Ghir_A05G025730		Ghir_A08G026800
	Ghir_A03G022110	Ghir_A09G013320		Ghir_A11G024480	Ghir_A09G020060	Ghir_D05G023580	Ghir_A08G025610	Ghir_A04G002810	Ghir_A12G012800		Ghir_A08G015660	Ghir_A05G025790		Ghir_A09G000120
	Ghir_A03G022150	Ghir_A09G013400		Ghir_A11G024490	Ghir_A09G021340	Ghir_D05G024560	Ghir_A08G026100	Ghir_A04G002820	Ghir_A12G013400		Ghir_A08G015730	Ghir_A05G026040		Ghir_A09G001350
	Ghir_A03G022180	Ghir_A09G013890		Ghir_A11G024560	Ghir_A09G021620	Ghir_D05G024710	Ghir_A08G026160	Ghir_A04G003320	Ghir_A12G015100		Ghir_A08G015970	Ghir_A05G026230		Ghir_A09G002410
	Ghir_A03G022200	Ghir_A09G014170		Ghir_A11G025120	Ghir_A09G021740	Ghir_D05G025140	Ghir_A08G026230	Ghir_A04G003450	Ghir_A12G015990		Ghir_A08G016780	Ghir_A05G026300		Ghir_A09G002450
	Ghir_A03G022280	Ghir_A09G014250		Ghir_A11G025420	Ghir_A09G022410	Ghir_D05G026100	Ghir_A08G026250	Ghir_A04G003560	Ghir_A12G016160		Ghir_A08G017170	Ghir_A05G026630		Ghir_A09G002490
	Ghir_A03G022300	Ghir_A09G014520		Ghir_A11G026170	Ghir_A09G022960	Ghir_D05G027340	Ghir_A08G026550	Ghir_A04G003640	Ghir_A12G016190		Ghir_A08G017320	Ghir_A05G026700		Ghir_A09G002840
	Ghir_A03G022350	Ghir_A09G015350		Ghir_A11G026910	Ghir_A09G023380	Ghir_D05G028680	Ghir_A08G026730	Ghir_A04G003650	Ghir_A12G016350		Ghir_A08G017410	Ghir_A05G026790		Ghir_A09G003040
	Ghir_A03G022390	Ghir_A09G015830		Ghir_A11G028840	Ghir_A09G023690	Ghir_D05G028800	Ghir_A08G026740	Ghir_A04G003740	Ghir_A12G016440		Ghir_A08G017900	Ghir_A05G026800		Ghir_A09G003270
	Ghir_A03G022410	Ghir_A09G016060		Ghir_A11G029150	Ghir_A09G023970	Ghir_D05G028840	Ghir_A08G026800	Ghir_A04G003940	Ghir_A12G016510		Ghir_A08G018230	Ghir_A05G026940		Ghir_A09G003520
	Ghir_A03G022620	Ghir_A09G016210		Ghir_A11G029830	Ghir_A09G024010	Ghir_D05G029480	Ghir_A09G000520	Ghir_A04G004370	Ghir_A12G016660		Ghir_A08G019690	Ghir_A05G028600		Ghir_A09G004480
	Ghir_A03G022640	Ghir_A09G016500		Ghir_A11G029970	Ghir_A09G024240	Ghir_D05G032460	Ghir_A09G001350	Ghir_A04G004400	Ghir_A12G016820		Ghir_A08G019700	Ghir_A05G028660		Ghir_A09G004550
	Ghir_A03G022650	Ghir_A09G016570		Ghir_A11G030220	Ghir_A09G024710	Ghir_D05G032630	Ghir_A09G001720	Ghir_A04G004460	Ghir_A12G017540		Ghir_A08G019740	Ghir_A05G028820		Ghir_A09G005190
	Ghir_A03G022660	Ghir_A09G017190		Ghir_A11G033250	Ghir_A09G025190	Ghir_D05G033080	Ghir_A09G003270	Ghir_A04G004690	Ghir_A12G017990		Ghir_A08G019750	Ghir_A05G028840		Ghir_A09G005210
	Ghir_A03G022740	Ghir_A09G017280		Ghir_A11G033470	Ghir_A09G025360	Ghir_D05G033560	Ghir_A09G003810	Ghir_A04G005190	Ghir_A12G018650		Ghir_A08G021310	Ghir_A05G028940		Ghir_A09G005350
	Ghir_A03G022780	Ghir_A09G017580		Ghir_A11G033900	Ghir_A09G025850	Ghir_D05G034240	Ghir_A09G004050	Ghir_A04G005260	Ghir_A12G019530		Ghir_A08G021410	Ghir_A05G029080		Ghir_A09G005480
	Ghir_A03G022800	Ghir_A09G017820		Ghir_A11G033940	Ghir_A09G025920	Ghir_D05G035480	Ghir_A09G004480	Ghir_A04G005480	Ghir_A12G019870		Ghir_A08G021530	Ghir_A05G029090		Ghir_A09G006020
	Ghir_A03G022820	Ghir_A09G018060		Ghir_A11G034190	Ghir_A10G001590	Ghir_D05G036790	Ghir_A09G005190	Ghir_A04G005740	Ghir_A12G020640		Ghir_A08G022640	Ghir_A05G029240		Ghir_A09G006740
	Ghir_A03G022920	Ghir_A09G018170		Ghir_A11G034900	Ghir_A10G001600	Ghir_D06G000050	Ghir_A09G005480	Ghir_A04G005870	Ghir_A12G021190		Ghir_A08G022720	Ghir_A05G029270		Ghir_A09G007830
	Ghir_A03G022950	Ghir_A09G018480		Ghir_A11G034990	Ghir_A10G001690	Ghir_D06G000680	Ghir_A09G006020	Ghir_A04G006010	Ghir_A12G021340		Ghir_A08G022810	Ghir_A05G029650		Ghir_A09G008580
	Ghir_A03G023030	Ghir_A09G018640		Ghir_A11G035230	Ghir_A10G001740	Ghir_D06G001100	Ghir_A09G006320	Ghir_A04G006080	Ghir_A12G021470		Ghir_A08G022940	Ghir_A05G030660		Ghir_A09G009250
	Ghir_A03G023320	Ghir_A09G018870		Ghir_A12G000680	Ghir_A10G001810	Ghir_D06G001480	Ghir_A09G006530	Ghir_A04G006170	Ghir_A12G021530		Ghir_A08G022950	Ghir_A05G030980		Ghir_A09G009740
	Ghir_A03G023620	Ghir_A09G019060		Ghir_A12G001030	Ghir_A10G002030	Ghir_D06G002160	Ghir_A09G006540	Ghir_A04G006520	Ghir_A12G022010		Ghir_A08G024590	Ghir_A05G031260		Ghir_A09G010110
	Ghir_A03G023640	Ghir_A09G019590		Ghir_A12G001180	Ghir_A10G002100	Ghir_D06G002390	Ghir_A09G007830	Ghir_A04G006570	Ghir_A12G022080		Ghir_A08G024740	Ghir_A05G031490		Ghir_A09G010570
	Ghir_A03G023820	Ghir_A09G019760		Ghir_A12G001340	Ghir_A10G002220	Ghir_D06G002550	Ghir_A09G008150	Ghir_A04G006610	Ghir_A12G022220		Ghir_A08G024900	Ghir_A05G031510		Ghir_A09G010600
	Ghir_A03G023890	Ghir_A09G020160		Ghir_A12G001600	Ghir_A10G002230	Ghir_D06G003340	Ghir_A09G008560	Ghir_A04G006800	Ghir_A12G022250		Ghir_A08G025210	Ghir_A05G032360		Ghir_A09G011060
	Ghir_A04G000260	Ghir_A09G020410		Ghir_A12G001740	Ghir_A10G002250	Ghir_D06G003680	Ghir_A09G009020	Ghir_A04G007020	Ghir_A12G022700		Ghir_A08G025360	Ghir_A05G032490		Ghir_A09G011120
	Ghir_A04G000400	Ghir_A09G020590		Ghir_A12G002490	Ghir_A10G002280	Ghir_D06G004110	Ghir_A09G009070	Ghir_A04G007060	Ghir_A12G022810		Ghir_A08G025420	Ghir_A05G032640		Ghir_A09G011180
	Ghir_A04G000560	Ghir_A09G020670		Ghir_A12G003370	Ghir_A10G002290	Ghir_D06G004850	Ghir_A09G009250	Ghir_A04G007780	Ghir_A12G023030		Ghir_A08G025610	Ghir_A05G032810		Ghir_A09G011670
	Ghir_A04G000600	Ghir_A09G021100		Ghir_A12G003890	Ghir_A10G003140	Ghir_D06G004960	Ghir_A09G009740	Ghir_A04G007870	Ghir_A12G023230		Ghir_A08G025760	Ghir_A05G032860		Ghir_A09G012550
	Ghir_A04G000680	Ghir_A09G021230		Ghir_A12G003970	Ghir_A10G003540	Ghir_D06G006850	Ghir_A09G009940	Ghir_A04G008070	Ghir_A12G024280		Ghir_A08G026250	Ghir_A05G032870		Ghir_A09G012860
	Ghir_A04G000700	Ghir_A09G021410		Ghir_A12G004220	Ghir_A10G003960	Ghir_D06G006880	Ghir_A09G010430	Ghir_A04G008090	Ghir_A12G025580		Ghir_A08G026320	Ghir_A05G033150		Ghir_A09G013060
	Ghir_A04G000940	Ghir_A09G021420		Ghir_A12G005450	Ghir_A10G004100	Ghir_D06G008030	Ghir_A09G010440	Ghir_A04G008200	Ghir_A12G025700		Ghir_A08G026490	Ghir_A05G033310		Ghir_A09G013820
	Ghir_A04G000980	Ghir_A09G021520		Ghir_A12G006050	Ghir_A10G005090	Ghir_D06G008940	Ghir_A09G010570	Ghir_A04G008250	Ghir_A12G025790		Ghir_A08G026550	Ghir_A05G033840		Ghir_A09G013980
	Ghir_A04G001030	Ghir_A09G021890		Ghir_A12G006210	Ghir_A10G005150	Ghir_D06G009820	Ghir_A09G011180	Ghir_A04G008390	Ghir_A12G026030		Ghir_A08G026640	Ghir_A05G033900		Ghir_A09G014100
	Ghir_A04G001070	Ghir_A09G021930		Ghir_A12G006420	Ghir_A10G005340	Ghir_D06G009960	Ghir_A09G011470	Ghir_A04G008600	Ghir_A12G026150		Ghir_A09G000520	Ghir_A05G034510		Ghir_A09G014210
	Ghir_A04G001090	Ghir_A09G022360		Ghir_A12G007380	Ghir_A10G005520	Ghir_D06G010000	Ghir_A09G012590	Ghir_A04G008970	Ghir_A12G026260		Ghir_A09G000560	Ghir_A05G035110		Ghir_A09G014240
	Ghir_A04G001250	Ghir_A09G022520		Ghir_A12G007770	Ghir_A10G006580	Ghir_D06G012260	Ghir_A09G012670	Ghir_A04G008980	Ghir_A12G026390		Ghir_A09G001040	Ghir_A05G035210		Ghir_A09G014300
	Ghir_A04G001260	Ghir_A09G022640		Ghir_A12G007980	Ghir_A10G007120	Ghir_D06G013360	Ghir_A09G012990	Ghir_A04G008990	Ghir_A12G027260		Ghir_A09G002390	Ghir_A05G035570		Ghir_A09G014520
	Ghir_A04G001330	Ghir_A09G022980		Ghir_A12G008050	Ghir_A10G007730	Ghir_D06G013410	Ghir_A09G013330	Ghir_A04G009040	Ghir_A12G027290		Ghir_A09G003540	Ghir_A05G035730		Ghir_A09G015360
	Ghir_A04G001820	Ghir_A09G023000		Ghir_A12G009260	Ghir_A10G007860	Ghir_D06G014320	Ghir_A09G013500	Ghir_A04G009250	Ghir_A12G027650		Ghir_A09G003830	Ghir_A05G035940		Ghir_A09G016390
	Ghir_A04G001830	Ghir_A09G023060		Ghir_A12G010520	Ghir_A10G007910	Ghir_D06G015860	Ghir_A09G013550	Ghir_A04G009300	Ghir_A12G028300		Ghir_A09G004050	Ghir_A05G036150		Ghir_A09G016620
	Ghir_A04G001930	Ghir_A09G023190		Ghir_A12G011030	Ghir_A10G008200	Ghir_D06G016590	Ghir_A09G013770	Ghir_A04G009340	Ghir_A12G028630		Ghir_A09G004800	Ghir_A05G036280		Ghir_A09G016630
	Ghir_A04G002100	Ghir_A09G023570		Ghir_A12G012450	Ghir_A10G008240	Ghir_D06G016610	Ghir_A09G014100	Ghir_A04G009680	Ghir_A13G000840		Ghir_A09G005080	Ghir_A05G036420		Ghir_A09G016670
	Ghir_A04G002190	Ghir_A09G023600		Ghir_A12G012730	Ghir_A10G008520	Ghir_D06G016810	Ghir_A09G014240	Ghir_A04G009790	Ghir_A13G001360		Ghir_A09G006060	Ghir_A05G036730		Ghir_A09G017020
	Ghir_A04G002220	Ghir_A09G023620		Ghir_A12G014010	Ghir_A10G008580	Ghir_D06G017970	Ghir_A09G014300	Ghir_A04G010210	Ghir_A13G001430		Ghir_A09G006320	Ghir_A05G036840		Ghir_A09G018210
	Ghir_A04G002480	Ghir_A09G023700		Ghir_A12G014330	Ghir_A10G008840	Ghir_D06G018060	Ghir_A09G014380	Ghir_A04G010260	Ghir_A13G002360		Ghir_A09G006460	Ghir_A05G036870		Ghir_A09G018560
	Ghir_A04G002530	Ghir_A09G023760		Ghir_A12G015610	Ghir_A10G008990	Ghir_D06G018650	Ghir_A09G014430	Ghir_A04G010360	Ghir_A13G002690		Ghir_A09G007110	Ghir_A05G036880		Ghir_A09G018810
	Ghir_A04G002610	Ghir_A09G024160		Ghir_A12G015780	Ghir_A10G009390	Ghir_D06G018680	Ghir_A09G015360	Ghir_A04G010420	Ghir_A13G002940		Ghir_A09G008330	Ghir_A05G037250		Ghir_A09G019760
	Ghir_A04G002820	Ghir_A09G024420		Ghir_A12G016510	Ghir_A10G009980	Ghir_D06G019640	Ghir_A09G015440	Ghir_A04G010470	Ghir_A13G003240		Ghir_A09G008810	Ghir_A05G037740		Ghir_A09G019860
	Ghir_A04G003260	Ghir_A09G024490		Ghir_A12G017190	Ghir_A10G010430	Ghir_D06G019950	Ghir_A09G016390	Ghir_A04G010660	Ghir_A13G003280		Ghir_A09G008860	Ghir_A05G038330		Ghir_A09G020160
	Ghir_A04G003320	Ghir_A09G024900		Ghir_A12G017400	Ghir_A10G010810	Ghir_D06G021190	Ghir_A09G016530	Ghir_A04G010800	Ghir_A13G004310		Ghir_A09G009010	Ghir_A05G038670		Ghir_A09G020670
	Ghir_A04G003450	Ghir_A09G024970		Ghir_A12G019580	Ghir_A10G012430	Ghir_D06G022610	Ghir_A09G016620	Ghir_A04G010950	Ghir_A13G008240		Ghir_A09G009070	Ghir_A05G039020		Ghir_A09G021120
	Ghir_A04G003500	Ghir_A09G025200		Ghir_A12G020720	Ghir_A10G013140	Ghir_D06G022970	Ghir_A09G016630	Ghir_A04G011200	Ghir_A13G010640		Ghir_A09G009520	Ghir_A05G039050		Ghir_A09G021170
	Ghir_A04G003560	Ghir_A10G000400		Ghir_A12G020960	Ghir_A10G014040	Ghir_D07G000120	Ghir_A09G016640	Ghir_A04G011500	Ghir_A13G011490		Ghir_A09G009900	Ghir_A05G039100		Ghir_A09G021270
	Ghir_A04G003640	Ghir_A10G000530		Ghir_A12G021080	Ghir_A10G014770	Ghir_D07G001350	Ghir_A09G016710	Ghir_A04G011660	Ghir_A13G011930		Ghir_A09G009940	Ghir_A05G039230		Ghir_A09G021420
	Ghir_A04G003740	Ghir_A10G000740		Ghir_A12G021640	Ghir_A10G015110	Ghir_D07G002140	Ghir_A09G017020	Ghir_A04G011780	Ghir_A13G012240		Ghir_A09G010050	Ghir_A05G039550		Ghir_A09G022520
	Ghir_A04G003940	Ghir_A10G000860		Ghir_A12G022490	Ghir_A10G015360	Ghir_D07G003540	Ghir_A09G017390	Ghir_A04G011850	Ghir_A13G012460		Ghir_A09G010380	Ghir_A05G039690		Ghir_A09G022980
	Ghir_A04G004370	Ghir_A10G002470		Ghir_A12G023720	Ghir_A10G015810	Ghir_D07G003820	Ghir_A09G018200	Ghir_A04G012070	Ghir_A13G012630		Ghir_A09G010430	Ghir_A05G040360		Ghir_A09G023190
	Ghir_A04G004380	Ghir_A10G002610		Ghir_A12G024900	Ghir_A10G016640	Ghir_D07G004360	Ghir_A09G018210	Ghir_A04G012460	Ghir_A13G012760		Ghir_A09G010440	Ghir_A05G041010		Ghir_A09G023720
	Ghir_A04G004460	Ghir_A10G002720		Ghir_A12G025200	Ghir_A10G016690	Ghir_D07G004430	Ghir_A09G018810	Ghir_A04G012790	Ghir_A13G013440		Ghir_A09G010930	Ghir_A05G041160		Ghir_A09G024230
	Ghir_A04G004690	Ghir_A10G002780		Ghir_A12G026080	Ghir_A10G016840	Ghir_D07G004540	Ghir_A09G021120	Ghir_A04G012940	Ghir_A13G014320		Ghir_A09G011230	Ghir_A05G041220		Ghir_A09G024330
	Ghir_A04G004810	Ghir_A10G003030		Ghir_A12G026260	Ghir_A10G017050	Ghir_D07G005070	Ghir_A09G021170	Ghir_A04G013010	Ghir_A13G014570		Ghir_A09G011790	Ghir_A05G041360		Ghir_A09G024900
	Ghir_A04G005190	Ghir_A10G003210		Ghir_A12G026270	Ghir_A10G017440	Ghir_D07G006680	Ghir_A09G021270	Ghir_A04G013070	Ghir_A13G014670		Ghir_A09G012280	Ghir_A05G041390		Ghir_A09G024970
	Ghir_A04G005210	Ghir_A10G003410		Ghir_A12G027780	Ghir_A10G017910	Ghir_D07G006890	Ghir_A09G022090	Ghir_A04G013220	Ghir_A13G016550		Ghir_A09G012450	Ghir_A05G041880		Ghir_A09G025200
	Ghir_A04G005260	Ghir_A10G003740		Ghir_A12G028110	Ghir_A10G018050	Ghir_D07G007410	Ghir_A09G022860	Ghir_A04G013310	Ghir_A13G017570		Ghir_A09G012470	Ghir_A05G042110		Ghir_A09G025270
	Ghir_A04G005290	Ghir_A10G003760		Ghir_A12G028330	Ghir_A10G018380	Ghir_D07G007960	Ghir_A09G023390	Ghir_A04G013690	Ghir_A13G017690		Ghir_A09G012690	Ghir_A05G042140		Ghir_A09G025770
	Ghir_A04G005380	Ghir_A10G004410		Ghir_A12G028530	Ghir_A10G018610	Ghir_D07G009740	Ghir_A09G023720	Ghir_A04G013920	Ghir_A13G018760		Ghir_A09G012990	Ghir_A05G042220		Ghir_A09G025820
	Ghir_A04G005430	Ghir_A10G004760		Ghir_A12G029150	Ghir_A10G018990	Ghir_D07G009950	Ghir_A09G024020	Ghir_A04G014030	Ghir_A13G020870		Ghir_A09G013240	Ghir_A05G042420		Ghir_A09G026330
	Ghir_A04G005480	Ghir_A10G004870		Ghir_A13G000040	Ghir_A10G019110	Ghir_D07G014140	Ghir_A09G024230	Ghir_A04G014340	Ghir_A13G023570		Ghir_A09G013280	Ghir_A05G042690		Ghir_A10G000760
	Ghir_A04G005630	Ghir_A10G006010		Ghir_A13G000460	Ghir_A10G019120	Ghir_D07G015400	Ghir_A09G024280	Ghir_A04G014540	Ghir_A13G024600		Ghir_A09G013500	Ghir_A05G042810		Ghir_A10G000850
	Ghir_A04G006010	Ghir_A10G006500		Ghir_A13G001080	Ghir_A10G019530	Ghir_D07G016040	Ghir_A09G024330	Ghir_A04G014630	Ghir_A13G025190		Ghir_A09G013970	Ghir_A05G042920		Ghir_A10G000870
	Ghir_A04G006080	Ghir_A10G006780		Ghir_A13G001140	Ghir_A10G019690	Ghir_D07G016350	Ghir_A09G024380	Ghir_A04G014810	Ghir_D01G000150		Ghir_A09G014700	Ghir_A06G000220		Ghir_A10G003210
	Ghir_A04G006160	Ghir_A10G006840		Ghir_A13G001300	Ghir_A10G019770	Ghir_D07G016600	Ghir_A09G024730	Ghir_A04G014870	Ghir_D01G000250		Ghir_A09G014740	Ghir_A06G000240		Ghir_A10G003340
	Ghir_A04G006170	Ghir_A10G006850		Ghir_A13G001610	Ghir_A10G020560	Ghir_D07G016990	Ghir_A09G025770	Ghir_A04G015120	Ghir_D01G000530		Ghir_A09G016530	Ghir_A06G000250		Ghir_A10G004710
	Ghir_A04G006520	Ghir_A10G006870		Ghir_A13G002100	Ghir_A10G021150	Ghir_D07G018570	Ghir_A09G026140	Ghir_A04G015570	Ghir_D01G000570		Ghir_A09G016640	Ghir_A06G000340		Ghir_A10G004810
	Ghir_A04G006530	Ghir_A10G006880		Ghir_A13G002570	Ghir_A10G022450	Ghir_D07G019430	Ghir_A09G026330	Ghir_A04G015610	Ghir_D01G000720		Ghir_A09G016710	Ghir_A06G000360		Ghir_A10G005540
	Ghir_A04G006610	Ghir_A10G007170		Ghir_A13G002800	Ghir_A10G022700	Ghir_D07G019470	Ghir_A10G000170	Ghir_A04G015680	Ghir_D01G001940		Ghir_A09G016850	Ghir_A06G000490		Ghir_A10G005820
	Ghir_A04G006700	Ghir_A10G007780		Ghir_A13G002990	Ghir_A10G022800	Ghir_D07G020710	Ghir_A10G000390	Ghir_A04G015690	Ghir_D01G002550		Ghir_A09G017190	Ghir_A06G001200		Ghir_A10G005940
	Ghir_A04G006800	Ghir_A10G009550		Ghir_A13G003130	Ghir_A10G024340	Ghir_D07G022470	Ghir_A10G000690	Ghir_A04G015730	Ghir_D01G002580		Ghir_A09G017390	Ghir_A06G001540		Ghir_A10G006840
	Ghir_A04G007020	Ghir_A10G009560		Ghir_A13G003220	Ghir_A11G000320	Ghir_D07G024010	Ghir_A10G000760	Ghir_A04G015740	Ghir_D01G004960		Ghir_A09G017820	Ghir_A06G001760		Ghir_A10G007170
	Ghir_A04G007060	Ghir_A10G009640		Ghir_A13G004060	Ghir_A11G000880	Ghir_D08G002940	Ghir_A10G000850	Ghir_A04G015850	Ghir_D01G005940		Ghir_A09G018480	Ghir_A06G001810		Ghir_A10G007260
	Ghir_A04G007720	Ghir_A10G013200		Ghir_A13G004130	Ghir_A11G000960	Ghir_D08G003640	Ghir_A10G001100	Ghir_A04G015860	Ghir_D01G005950		Ghir_A09G018640	Ghir_A06G002010		Ghir_A10G007580
	Ghir_A04G007780	Ghir_A10G014650		Ghir_A13G004160	Ghir_A11G001680	Ghir_D08G003870	Ghir_A10G002990	Ghir_A04G016240	Ghir_D01G006020		Ghir_A09G018680	Ghir_A06G002540		Ghir_A10G007660
	Ghir_A04G007870	Ghir_A10G014860		Ghir_A13G004710	Ghir_A11G001900	Ghir_D08G003880	Ghir_A10G003360	Ghir_A04G016280	Ghir_D01G006140		Ghir_A09G019300	Ghir_A06G003010		Ghir_A10G008410
	Ghir_A04G008090	Ghir_A10G015080		Ghir_A13G005250	Ghir_A11G003130	Ghir_D08G005260	Ghir_A10G003750	Ghir_A04G016300	Ghir_D01G007330		Ghir_A09G019400	Ghir_A06G003020		Ghir_A10G009640
	Ghir_A04G008200	Ghir_A10G015450		Ghir_A13G005270	Ghir_A11G003510	Ghir_D08G008600	Ghir_A10G003790	Ghir_A04G016390	Ghir_D01G007370		Ghir_A09G019590	Ghir_A06G003140		Ghir_A10G010460
	Ghir_A04G008550	Ghir_A10G015520		Ghir_A13G005900	Ghir_A11G003670	Ghir_D08G011030	Ghir_A10G003810	Ghir_A04G016400	Ghir_D01G007550		Ghir_A09G019720	Ghir_A06G003210		Ghir_A10G010700
	Ghir_A04G008600	Ghir_A10G016750		Ghir_A13G007190	Ghir_A11G005670	Ghir_D08G013670	Ghir_A10G003820	Ghir_A05G000140	Ghir_D01G007630		Ghir_A09G020010	Ghir_A06G003490		Ghir_A10G012550
	Ghir_A04G008970	Ghir_A10G016800		Ghir_A13G008000	Ghir_A11G005710	Ghir_D08G013740	Ghir_A10G004660	Ghir_A05G000170	Ghir_D01G007840		Ghir_A09G020570	Ghir_A06G003540		Ghir_A10G012800
	Ghir_A04G008980	Ghir_A10G016830		Ghir_A13G008240	Ghir_A11G005720	Ghir_D08G014000	Ghir_A10G004810	Ghir_A05G000190	Ghir_D01G009900		Ghir_A09G021200	Ghir_A06G003550		Ghir_A10G013670
	Ghir_A04G008990	Ghir_A10G017500		Ghir_A13G010660	Ghir_A11G006020	Ghir_D08G015110	Ghir_A10G005730	Ghir_A05G000230	Ghir_D01G009950		Ghir_A09G021690	Ghir_A06G003640		Ghir_A10G013900
	Ghir_A04G009300	Ghir_A10G017700		Ghir_A13G010900	Ghir_A11G006210	Ghir_D08G015580	Ghir_A10G006380	Ghir_A05G000510	Ghir_D01G010050		Ghir_A09G021870	Ghir_A06G003690		Ghir_A10G013960
	Ghir_A04G009340	Ghir_A10G017710		Ghir_A13G011300	Ghir_A11G006420	Ghir_D08G015820	Ghir_A10G006640	Ghir_A05G000540	Ghir_D01G010630		Ghir_A09G022100	Ghir_A06G003830		Ghir_A10G013980
	Ghir_A04G009640	Ghir_A10G018310		Ghir_A13G012040	Ghir_A11G007200	Ghir_D08G017100	Ghir_A10G007390	Ghir_A05G000670	Ghir_D01G011090		Ghir_A09G022130	Ghir_A06G003880		Ghir_A10G014230
	Ghir_A04G009790	Ghir_A10G018790		Ghir_A13G012550	Ghir_A11G007420	Ghir_D08G018320	Ghir_A10G008230	Ghir_A05G000830	Ghir_D01G011130		Ghir_A09G022360	Ghir_A06G003910		Ghir_A10G015160
	Ghir_A04G010210	Ghir_A10G019000		Ghir_A13G012810	Ghir_A11G007640	Ghir_D08G018820	Ghir_A10G008400	Ghir_A05G000860	Ghir_D01G011660		Ghir_A09G022640	Ghir_A06G004430		Ghir_A10G015190
	Ghir_A04G010360	Ghir_A10G019080		Ghir_A13G013300	Ghir_A11G007780	Ghir_D08G019100	Ghir_A10G009470	Ghir_A05G000880	Ghir_D01G011860		Ghir_A09G022650	Ghir_A06G004900		Ghir_A10G015530
	Ghir_A04G010420	Ghir_A10G019270		Ghir_A13G013480	Ghir_A11G008630	Ghir_D08G019240	Ghir_A10G010480	Ghir_A05G000940	Ghir_D01G012050		Ghir_A09G022860	Ghir_A06G005740		Ghir_A10G017490
	Ghir_A04G010470	Ghir_A10G019450		Ghir_A13G013520	Ghir_A11G008870	Ghir_D08G019350	Ghir_A10G010580	Ghir_A05G001030	Ghir_D01G012230		Ghir_A09G023040	Ghir_A06G006770		Ghir_A10G018310
	Ghir_A04G010570	Ghir_A10G019520		Ghir_A13G013840	Ghir_A11G008990	Ghir_D08G020360	Ghir_A10G010700	Ghir_A05G001080	Ghir_D01G015360		Ghir_A09G023390	Ghir_A06G006960		Ghir_A10G018770
	Ghir_A04G010660	Ghir_A10G019750		Ghir_A13G014410	Ghir_A11G009220	Ghir_D08G021250	Ghir_A10G012180	Ghir_A05G001120	Ghir_D01G015370		Ghir_A09G023830	Ghir_A06G007020		Ghir_A10G018790
	Ghir_A04G010780	Ghir_A10G020020		Ghir_A13G014670	Ghir_A11G009300	Ghir_D08G021430	Ghir_A10G012550	Ghir_A05G001260	Ghir_D01G018000		Ghir_A09G024020	Ghir_A06G007100		Ghir_A10G019020
	Ghir_A04G011200	Ghir_A10G020070		Ghir_A13G014720	Ghir_A11G009510	Ghir_D08G022210	Ghir_A10G012770	Ghir_A05G001400	Ghir_D01G018220		Ghir_A09G024160	Ghir_A06G007550		Ghir_A10G019470
	Ghir_A04G011800	Ghir_A10G020100		Ghir_A13G016510	Ghir_A11G009780	Ghir_D08G022380	Ghir_A10G013110	Ghir_A05G001650	Ghir_D01G018620		Ghir_A09G024280	Ghir_A06G007580		Ghir_A10G022330
	Ghir_A04G011850	Ghir_A10G020660		Ghir_A13G017030	Ghir_A11G010110	Ghir_D08G023000	Ghir_A10G013770	Ghir_A05G001780	Ghir_D01G019050		Ghir_A09G024610	Ghir_A06G007870		Ghir_A10G022370
	Ghir_A04G012050	Ghir_A10G021440		Ghir_A13G017050	Ghir_A11G010150	Ghir_D08G023950	Ghir_A10G014230	Ghir_A05G001870	Ghir_D01G019590		Ghir_A09G024670	Ghir_A06G007950		Ghir_A10G022770
	Ghir_A04G012460	Ghir_A10G021690		Ghir_A13G017560	Ghir_A11G010170	Ghir_D08G024090	Ghir_A10G015160	Ghir_A05G001900	Ghir_D01G020270		Ghir_A09G024730	Ghir_A06G008070		Ghir_A10G023130
	Ghir_A04G012790	Ghir_A10G022150		Ghir_A13G017750	Ghir_A11G010990	Ghir_D09G000840	Ghir_A10G015530	Ghir_A05G001970	Ghir_D01G020550		Ghir_A09G025910	Ghir_A06G008150		Ghir_A10G023480
	Ghir_A04G012940	Ghir_A10G022330		Ghir_A13G018570	Ghir_A11G011760	Ghir_D09G000940	Ghir_A10G015690	Ghir_A05G002150	Ghir_D01G021680		Ghir_A09G026140	Ghir_A06G008400		Ghir_A10G023660
	Ghir_A04G013310	Ghir_A10G022440		Ghir_A13G018740	Ghir_A11G012730	Ghir_D09G001540	Ghir_A10G016310	Ghir_A05G002160	Ghir_D01G021930		Ghir_A09G026480	Ghir_A06G008770		Ghir_A10G024020
	Ghir_A04G013690	Ghir_A10G022550		Ghir_A13G018770	Ghir_A11G012970	Ghir_D09G002270	Ghir_A10G017490	Ghir_A05G002200	Ghir_D01G022270		Ghir_A10G000110	Ghir_A06G008830		Ghir_A10G024370
	Ghir_A04G014020	Ghir_A10G023320		Ghir_A13G019060	Ghir_A11G012990	Ghir_D09G002690	Ghir_A10G018770	Ghir_A05G002240	Ghir_D01G023850		Ghir_A10G000120	Ghir_A06G008880		Ghir_A11G001190
	Ghir_A04G014030	Ghir_A10G023420		Ghir_A13G019130	Ghir_A11G013000	Ghir_D09G004630	Ghir_A10G019910	Ghir_A05G002370	Ghir_D02G002540		Ghir_A10G000170	Ghir_A06G008940		Ghir_A11G001370
	Ghir_A04G014340	Ghir_A10G024180		Ghir_A13G019200	Ghir_A11G013540	Ghir_D09G004940	Ghir_A10G020220	Ghir_A05G002380	Ghir_D02G003390		Ghir_A10G000390	Ghir_A06G009000		Ghir_A11G001390
	Ghir_A04G014540	Ghir_A10G024490		Ghir_A13G019310	Ghir_A11G013660	Ghir_D09G005900	Ghir_A10G020920	Ghir_A05G002420	Ghir_D02G003440		Ghir_A10G000690	Ghir_A06G009090		Ghir_A11G002880
	Ghir_A04G014630	Ghir_A11G000350		Ghir_A13G019600	Ghir_A11G014080	Ghir_D09G006610	Ghir_A10G021110	Ghir_A05G002500	Ghir_D02G003540		Ghir_A10G000740	Ghir_A06G009210		Ghir_A11G003940
	Ghir_A04G014870	Ghir_A11G001260		Ghir_A13G019730	Ghir_A11G014760	Ghir_D09G006800	Ghir_A10G022300	Ghir_A05G002540	Ghir_D02G003810		Ghir_A10G001100	Ghir_A06G009240		Ghir_A11G003950
	Ghir_A04G015060	Ghir_A11G001390		Ghir_A13G020000	Ghir_A11G015170	Ghir_D09G006840	Ghir_A10G022370	Ghir_A05G002630	Ghir_D02G003890		Ghir_A10G001320	Ghir_A06G009560		Ghir_A11G004370
	Ghir_A04G015120	Ghir_A11G001430		Ghir_A13G020840	Ghir_A11G015320	Ghir_D09G007890	Ghir_A10G022670	Ghir_A05G002650	Ghir_D02G004630		Ghir_A10G002420	Ghir_A06G009660		Ghir_A11G004470
	Ghir_A04G015570	Ghir_A11G001660		Ghir_A13G020910	Ghir_A11G015620	Ghir_D09G009410	Ghir_A10G022770	Ghir_A05G002710	Ghir_D02G006010		Ghir_A10G002990	Ghir_A06G010040		Ghir_A11G005080
	Ghir_A04G015610	Ghir_A11G001840		Ghir_A13G021260	Ghir_A11G016300	Ghir_D09G009690	Ghir_A10G023480	Ghir_A05G002880	Ghir_D02G008950		Ghir_A10G003400	Ghir_A06G010080		Ghir_A11G005390
	Ghir_A04G015680	Ghir_A11G002610		Ghir_A13G021300	Ghir_A11G016480	Ghir_D09G010540	Ghir_A10G023740	Ghir_A05G002920	Ghir_D02G009810		Ghir_A10G003580	Ghir_A06G010130		Ghir_A11G005510
	Ghir_A04G015730	Ghir_A11G002880		Ghir_A13G023810	Ghir_A11G017370	Ghir_D09G010810	Ghir_A10G024010	Ghir_A05G002960	Ghir_D02G009830		Ghir_A10G003790	Ghir_A06G010450		Ghir_A11G005990
	Ghir_A04G015740	Ghir_A11G003230		Ghir_A13G024190	Ghir_A11G017520	Ghir_D09G011580	Ghir_A10G024020	Ghir_A05G003090	Ghir_D02G010100		Ghir_A10G004120	Ghir_A06G010590		Ghir_A11G006130
	Ghir_A04G015840	Ghir_A11G003570		Ghir_A13G024630	Ghir_A11G018420	Ghir_D09G011890	Ghir_A10G024370	Ghir_A05G003280	Ghir_D02G010520		Ghir_A10G004660	Ghir_A06G010810		Ghir_A11G006170
	Ghir_A04G015850	Ghir_A11G003720		Ghir_D01G000310	Ghir_A11G018690	Ghir_D09G012290	Ghir_A11G000150	Ghir_A05G003860	Ghir_D02G012190		Ghir_A10G005470	Ghir_A06G011190		Ghir_A11G006550
	Ghir_A04G015860	Ghir_A11G004090		Ghir_D01G001280	Ghir_A11G018870	Ghir_D09G012720	Ghir_A11G001190	Ghir_A05G003940	Ghir_D02G012410		Ghir_A10G005530	Ghir_A06G011660		Ghir_A11G006580
	Ghir_A04G016060	Ghir_A11G004110		Ghir_D01G001580	Ghir_A11G018890	Ghir_D09G012750	Ghir_A11G001280	Ghir_A05G004180	Ghir_D02G013100		Ghir_A10G005730	Ghir_A06G011900		Ghir_A11G006600
	Ghir_A04G016240	Ghir_A11G004500		Ghir_D01G001970	Ghir_A11G018970	Ghir_D09G013230	Ghir_A11G001370	Ghir_A05G004490	Ghir_D02G014120		Ghir_A10G005750	Ghir_A06G012020		Ghir_A11G006630
	Ghir_A04G016280	Ghir_A11G004550		Ghir_D01G002250	Ghir_A11G019090	Ghir_D09G013650	Ghir_A11G002050	Ghir_A05G004520	Ghir_D02G014790		Ghir_A10G006540	Ghir_A06G012130		Ghir_A11G006910
	Ghir_A04G016300	Ghir_A11G004640		Ghir_D01G003020	Ghir_A11G019200	Ghir_D09G013880	Ghir_A11G002210	Ghir_A05G004840	Ghir_D02G015340		Ghir_A10G006640	Ghir_A06G012700		Ghir_A11G007510
	Ghir_A04G016390	Ghir_A11G004710		Ghir_D01G003650	Ghir_A11G020080	Ghir_D09G014410	Ghir_A11G002860	Ghir_A05G005040	Ghir_D02G015580		Ghir_A10G006850	Ghir_A06G012970		Ghir_A11G007660
	Ghir_A04G016400	Ghir_A11G005080		Ghir_D01G004440	Ghir_A11G020250	Ghir_D09G014430	Ghir_A11G002960	Ghir_A05G005190	Ghir_D02G016860		Ghir_A10G007050	Ghir_A06G013030		Ghir_A11G008040
	Ghir_A05G000130	Ghir_A11G005300		Ghir_D01G005040	Ghir_A11G021100	Ghir_D09G015240	Ghir_A11G003240	Ghir_A05G005610	Ghir_D02G017590		Ghir_A10G007390	Ghir_A06G013350		Ghir_A11G008170
	Ghir_A05G000140	Ghir_A11G005510		Ghir_D01G005900	Ghir_A11G021260	Ghir_D09G015620	Ghir_A11G003530	Ghir_A05G005660	Ghir_D02G018120		Ghir_A10G007640	Ghir_A06G013540		Ghir_A11G009330
	Ghir_A05G000190	Ghir_A11G006010		Ghir_D01G005950	Ghir_A11G021310	Ghir_D09G016220	Ghir_A11G003940	Ghir_A05G005940	Ghir_D02G018300		Ghir_A10G008400	Ghir_A06G013890		Ghir_A11G009830
	Ghir_A05G000210	Ghir_A11G006270		Ghir_D01G007330	Ghir_A11G021850	Ghir_D09G016810	Ghir_A11G003950	Ghir_A05G006020	Ghir_D02G018860		Ghir_A10G008690	Ghir_A06G014040		Ghir_A11G010130
	Ghir_A05G000400	Ghir_A11G006430		Ghir_D01G007630	Ghir_A11G021940	Ghir_D09G017990	Ghir_A11G004370	Ghir_A05G006060	Ghir_D02G018940		Ghir_A10G009250	Ghir_A06G014500		Ghir_A11G011020
	Ghir_A05G000510	Ghir_A11G006540		Ghir_D01G007880	Ghir_A11G023500	Ghir_D09G018030	Ghir_A11G004690	Ghir_A05G006140	Ghir_D02G018970		Ghir_A10G009550	Ghir_A06G014630		Ghir_A11G011200
	Ghir_A05G000540	Ghir_A11G006910		Ghir_D01G007980	Ghir_A11G023560	Ghir_D09G018420	Ghir_A11G005870	Ghir_A05G006660	Ghir_D02G019410		Ghir_A10G009570	Ghir_A06G014730		Ghir_A11G011380
	Ghir_A05G000580	Ghir_A11G007330		Ghir_D01G009590	Ghir_A11G024340	Ghir_D09G019610	Ghir_A11G005990	Ghir_A05G006830	Ghir_D02G020600		Ghir_A10G010480	Ghir_A06G014780		Ghir_A11G014060
	Ghir_A05G000670	Ghir_A11G007510		Ghir_D01G010630	Ghir_A11G024660	Ghir_D09G019780	Ghir_A11G006150	Ghir_A05G006920	Ghir_D02G021050		Ghir_A10G011200	Ghir_A06G015020		Ghir_A11G014210
	Ghir_A05G000750	Ghir_A11G007710		Ghir_D01G010960	Ghir_A11G024840	Ghir_D09G020220	Ghir_A11G006170	Ghir_A05G007070	Ghir_D02G021350		Ghir_A10G011980	Ghir_A06G015140		Ghir_A11G014850
	Ghir_A05G000860	Ghir_A11G008170		Ghir_D01G011220	Ghir_A11G025620	Ghir_D09G021400	Ghir_A11G006550	Ghir_A05G007600	Ghir_D02G021420		Ghir_A10G012180	Ghir_A06G015230		Ghir_A11G015090
	Ghir_A05G000940	Ghir_A11G008270		Ghir_D01G011660	Ghir_A11G025800	Ghir_D09G021500	Ghir_A11G006630	Ghir_A05G007620	Ghir_D02G021970		Ghir_A10G012770	Ghir_A06G015290		Ghir_A11G015900
	Ghir_A05G001080	Ghir_A11G008280		Ghir_D01G012630	Ghir_A11G025860	Ghir_D09G021640	Ghir_A11G006740	Ghir_A05G007630	Ghir_D02G022590		Ghir_A10G012840	Ghir_A06G015390		Ghir_A11G016100
	Ghir_A05G001120	Ghir_A11G008290		Ghir_D01G012970	Ghir_A11G027080	Ghir_D09G022750	Ghir_A11G007400	Ghir_A05G007760	Ghir_D02G023120		Ghir_A10G013770	Ghir_A06G015430		Ghir_A11G016150
	Ghir_A05G001260	Ghir_A11G008980		Ghir_D01G013220	Ghir_A11G027300	Ghir_D09G023610	Ghir_A11G007660	Ghir_A05G008110	Ghir_D02G023710		Ghir_A10G013800	Ghir_A06G015630		Ghir_A11G016350
	Ghir_A05G001400	Ghir_A11G009120		Ghir_D01G014880	Ghir_A11G027570	Ghir_D09G024780	Ghir_A11G007760	Ghir_A05G008270	Ghir_D02G024500		Ghir_A10G014290	Ghir_A06G016350		Ghir_A11G018080
	Ghir_A05G001650	Ghir_A11G009640		Ghir_D01G015280	Ghir_A11G027680	Ghir_D10G001400	Ghir_A11G008140	Ghir_A05G008370	Ghir_D02G024900		Ghir_A10G015180	Ghir_A06G016730		Ghir_A11G018440
	Ghir_A05G001770	Ghir_A11G009750		Ghir_D01G015380	Ghir_A11G028180	Ghir_D10G002860	Ghir_A11G008250	Ghir_A05G008420	Ghir_D03G001720		Ghir_A10G015520	Ghir_A06G017130		Ghir_A11G018740
	Ghir_A05G001870	Ghir_A11G010260		Ghir_D01G015480	Ghir_A11G028790	Ghir_D10G004350	Ghir_A11G009330	Ghir_A05G008540	Ghir_D03G002410		Ghir_A10G015690	Ghir_A06G017500		Ghir_A11G019270
	Ghir_A05G001900	Ghir_A11G011440		Ghir_D01G015830	Ghir_A11G028860	Ghir_D10G004560	Ghir_A11G009400	Ghir_A05G008670	Ghir_D03G002500		Ghir_A10G016010	Ghir_A06G017580		Ghir_A11G019780
	Ghir_A05G001970	Ghir_A11G012330		Ghir_D01G017440	Ghir_A11G029080	Ghir_D10G004840	Ghir_A11G009680	Ghir_A05G008690	Ghir_D03G002980		Ghir_A10G016140	Ghir_A06G017590		Ghir_A11G020890
	Ghir_A05G002010	Ghir_A11G012810		Ghir_D01G017740	Ghir_A11G029280	Ghir_D10G005410	Ghir_A11G009830	Ghir_A05G008770	Ghir_D03G003010		Ghir_A10G016430	Ghir_A06G017710		Ghir_A11G022260
	Ghir_A05G002100	Ghir_A11G013160		Ghir_D01G018220	Ghir_A11G029400	Ghir_D10G005870	Ghir_A11G010600	Ghir_A05G008800	Ghir_D03G003300		Ghir_A10G016670	Ghir_A06G017880		Ghir_A11G022290
	Ghir_A05G002160	Ghir_A11G013170		Ghir_D01G018660	Ghir_A11G029570	Ghir_D10G007680	Ghir_A11G011020	Ghir_A05G009160	Ghir_D03G004290		Ghir_A10G016830	Ghir_A06G018110		Ghir_A11G022450
	Ghir_A05G002200	Ghir_A11G013230		Ghir_D01G018780	Ghir_A11G029650	Ghir_D10G008190	Ghir_A11G011380	Ghir_A05G009220	Ghir_D03G004800		Ghir_A10G017140	Ghir_A06G018460		Ghir_A11G022960
	Ghir_A05G002240	Ghir_A11G013240		Ghir_D01G019850	Ghir_A11G030310	Ghir_D10G008230	Ghir_A11G011530	Ghir_A05G009350	Ghir_D03G005330		Ghir_A10G017710	Ghir_A06G018560		Ghir_A11G023270
	Ghir_A05G002370	Ghir_A11G014060		Ghir_D01G020040	Ghir_A11G030600	Ghir_D10G009650	Ghir_A11G011840	Ghir_A05G009600	Ghir_D03G005760		Ghir_A10G018170	Ghir_A06G019450		Ghir_A11G023720
	Ghir_A05G002410	Ghir_A11G014220		Ghir_D01G020490	Ghir_A11G030670	Ghir_D10G009860	Ghir_A11G014850	Ghir_A05G009650	Ghir_D03G006220		Ghir_A10G018290	Ghir_A06G019840		Ghir_A11G025370
	Ghir_A05G002500	Ghir_A11G014670		Ghir_D01G020530	Ghir_A11G031810	Ghir_D10G010350	Ghir_A11G014990	Ghir_A05G009990	Ghir_D03G006470		Ghir_A10G018460	Ghir_A06G020090		Ghir_A11G025530
	Ghir_A05G002510	Ghir_A11G015210		Ghir_D01G020590	Ghir_A11G031850	Ghir_D10G010490	Ghir_A11G015090	Ghir_A05G010230	Ghir_D03G007530		Ghir_A10G018560	Ghir_A06G020180		Ghir_A11G026110
	Ghir_A05G002540	Ghir_A11G016140		Ghir_D01G020670	Ghir_A11G032900	Ghir_D10G010650	Ghir_A11G015400	Ghir_A05G010320	Ghir_D03G008140		Ghir_A10G020060	Ghir_A06G020370		Ghir_A11G026910
	Ghir_A05G002590	Ghir_A11G016350		Ghir_D01G020830	Ghir_A11G033560	Ghir_D10G011300	Ghir_A11G015900	Ghir_A05G010350	Ghir_D03G008620		Ghir_A10G020130	Ghir_A06G020450		Ghir_A11G028970
	Ghir_A05G002650	Ghir_A11G018080		Ghir_D01G022270	Ghir_A11G034000	Ghir_D10G011950	Ghir_A11G016150	Ghir_A05G010380	Ghir_D03G009220		Ghir_A10G020260	Ghir_A06G021530		Ghir_A11G028980
	Ghir_A05G002710	Ghir_A11G018150		Ghir_D01G022390	Ghir_A11G034940	Ghir_D10G012980	Ghir_A11G016610	Ghir_A05G010400	Ghir_D03G009330		Ghir_A10G020810	Ghir_A06G021720		Ghir_A11G029100
	Ghir_A05G002880	Ghir_A11G018410		Ghir_D01G022880	Ghir_A11G034980	Ghir_D10G013280	Ghir_A11G017890	Ghir_A05G010420	Ghir_D03G009890		Ghir_A10G020920	Ghir_A06G022000		Ghir_A11G029150
	Ghir_A05G002920	Ghir_A11G018440		Ghir_D02G000280	Ghir_A11G035390	Ghir_D10G014010	Ghir_A11G020500	Ghir_A05G010590	Ghir_D03G009930		Ghir_A10G021110	Ghir_A06G022010		Ghir_A11G029360
	Ghir_A05G003090	Ghir_A11G018740		Ghir_D02G001320	Ghir_A11G035550	Ghir_D10G014850	Ghir_A11G020510	Ghir_A05G010680	Ghir_D03G011310		Ghir_A10G021940	Ghir_A06G022370		Ghir_A11G029750
	Ghir_A05G003450	Ghir_A11G020120		Ghir_D02G003280	Ghir_A12G000080	Ghir_D10G015360	Ghir_A11G022450	Ghir_A05G010850	Ghir_D03G011360		Ghir_A10G022300	Ghir_A06G022420		Ghir_A11G029860
	Ghir_A05G003760	Ghir_A11G020420		Ghir_D02G003480	Ghir_A12G000430	Ghir_D10G016980	Ghir_A11G022630	Ghir_A05G010890	Ghir_D03G011900		Ghir_A10G022670	Ghir_A06G022440		Ghir_A11G029970
	Ghir_A05G003790	Ghir_A11G023280		Ghir_D02G004190	Ghir_A12G000870	Ghir_D10G019760	Ghir_A11G023270	Ghir_A05G010900	Ghir_D03G013090		Ghir_A10G022720	Ghir_A06G022800		Ghir_A11G031650
	Ghir_A05G003860	Ghir_A11G023900		Ghir_D02G004770	Ghir_A12G000880	Ghir_D10G022180	Ghir_A11G023290	Ghir_A05G010970	Ghir_D03G013260		Ghir_A10G022810	Ghir_A07G000160		Ghir_A11G032100
	Ghir_A05G003900	Ghir_A11G024630		Ghir_D02G005530	Ghir_A12G001010	Ghir_D10G022340	Ghir_A11G023720	Ghir_A05G011280	Ghir_D03G013620		Ghir_A10G023740	Ghir_A07G000520		Ghir_A11G032700
	Ghir_A05G003940	Ghir_A11G025020		Ghir_D02G006340	Ghir_A12G001470	Ghir_D10G023880	Ghir_A11G024160	Ghir_A05G011320	Ghir_D03G014710		Ghir_A10G023890	Ghir_A07G000580		Ghir_A11G033050
	Ghir_A05G004180	Ghir_A11G025280		Ghir_D02G006860	Ghir_A12G001710	Ghir_D10G026170	Ghir_A11G025530	Ghir_A05G011340	Ghir_D03G014740		Ghir_A11G000360	Ghir_A07G000940		Ghir_A11G033230
	Ghir_A05G004290	Ghir_A11G025370		Ghir_D02G008200	Ghir_A12G002140	Ghir_D10G027110	Ghir_A11G025540	Ghir_A05G011410	Ghir_D03G015450		Ghir_A11G000670	Ghir_A07G000950		Ghir_A11G033440
	Ghir_A05G004490	Ghir_A11G025500		Ghir_D02G008780	Ghir_A12G002830	Ghir_D11G000110	Ghir_A11G025680	Ghir_A05G011430	Ghir_D03G016590		Ghir_A11G001260	Ghir_A07G001030		Ghir_A11G034790
	Ghir_A05G004540	Ghir_A11G025510		Ghir_D02G008830	Ghir_A12G003130	Ghir_D11G000400	Ghir_A11G026110	Ghir_A05G011660	Ghir_D03G017410		Ghir_A11G001580	Ghir_A07G001140		Ghir_A11G034880
	Ghir_A05G004840	Ghir_A11G025560		Ghir_D02G010100	Ghir_A12G003910	Ghir_D11G002220	Ghir_A11G026900	Ghir_A05G011670	Ghir_D03G017620		Ghir_A11G001740	Ghir_A07G001330		Ghir_A11G034930
	Ghir_A05G005040	Ghir_A11G027120		Ghir_D02G010180	Ghir_A12G004190	Ghir_D11G002230	Ghir_A11G027450	Ghir_A05G011710	Ghir_D03G017680		Ghir_A11G001890	Ghir_A07G001360		Ghir_A11G034970
	Ghir_A05G005190	Ghir_A11G027850		Ghir_D02G010550	Ghir_A12G004580	Ghir_D11G004070	Ghir_A11G028750	Ghir_A05G011830	Ghir_D04G000580		Ghir_A11G002150	Ghir_A07G001370		Ghir_A11G035130
	Ghir_A05G005220	Ghir_A11G028070		Ghir_D02G010740	Ghir_A12G004990	Ghir_D11G004760	Ghir_A11G028960	Ghir_A05G012060	Ghir_D04G002420		Ghir_A11G002250	Ghir_A07G001410		Ghir_A11G035270
	Ghir_A05G005470	Ghir_A11G029100		Ghir_D02G010830	Ghir_A12G005690	Ghir_D11G004800	Ghir_A11G028970	Ghir_A05G012080	Ghir_D04G003030		Ghir_A11G002570	Ghir_A07G001420		Ghir_A11G035780
	Ghir_A05G005610	Ghir_A11G029750		Ghir_D02G010870	Ghir_A12G006060	Ghir_D11G004840	Ghir_A11G028980	Ghir_A05G012210	Ghir_D04G003070		Ghir_A11G002770	Ghir_A07G001510		Ghir_A12G001530
	Ghir_A05G005660	Ghir_A11G029950		Ghir_D02G011020	Ghir_A12G006300	Ghir_D11G005120	Ghir_A11G029070	Ghir_A05G012220	Ghir_D04G003640		Ghir_A11G002860	Ghir_A07G001660		Ghir_A12G001830
	Ghir_A05G005780	Ghir_A11G029990		Ghir_D02G011450	Ghir_A12G006330	Ghir_D11G006800	Ghir_A11G029410	Ghir_A05G012550	Ghir_D04G003770		Ghir_A11G002960	Ghir_A07G001800		Ghir_A12G001910
	Ghir_A05G006020	Ghir_A11G030560		Ghir_D02G011810	Ghir_A12G006850	Ghir_D11G007080	Ghir_A11G029710	Ghir_A05G012610	Ghir_D04G004720		Ghir_A11G002980	Ghir_A07G002020		Ghir_A12G002170
	Ghir_A05G006060	Ghir_A11G030660		Ghir_D02G012370	Ghir_A12G007120	Ghir_D11G007860	Ghir_A11G029860	Ghir_A05G012660	Ghir_D04G005990		Ghir_A11G003240	Ghir_A07G002030		Ghir_A12G002410
	Ghir_A05G006140	Ghir_A11G031410		Ghir_D02G012650	Ghir_A12G007560	Ghir_D11G007980	Ghir_A11G031650	Ghir_A05G012760	Ghir_D04G006080		Ghir_A11G003550	Ghir_A07G002420		Ghir_A12G002490
	Ghir_A05G006260	Ghir_A11G031840		Ghir_D02G013240	Ghir_A12G007620	Ghir_D11G009020	Ghir_A11G032100	Ghir_A05G012860	Ghir_D04G007190		Ghir_A11G003820	Ghir_A07G002520		Ghir_A12G002570
	Ghir_A05G006450	Ghir_A11G032170		Ghir_D02G013360	Ghir_A12G008260	Ghir_D11G009130	Ghir_A11G032150	Ghir_A05G012880	Ghir_D04G007820		Ghir_A11G004460	Ghir_A07G002570		Ghir_A12G003330
	Ghir_A05G006650	Ghir_A11G032670		Ghir_D02G015330	Ghir_A12G008340	Ghir_D11G009570	Ghir_A11G033120	Ghir_A05G013060	Ghir_D04G008950		Ghir_A11G004690	Ghir_A07G003030		Ghir_A12G003490
	Ghir_A05G006660	Ghir_A11G032700		Ghir_D02G016310	Ghir_A12G008450	Ghir_D11G009760	Ghir_A11G033440	Ghir_A05G013420	Ghir_D04G008980		Ghir_A11G004820	Ghir_A07G003080		Ghir_A12G004020
	Ghir_A05G006770	Ghir_A11G033000		Ghir_D02G016990	Ghir_A12G008650	Ghir_D11G010840	Ghir_A11G034380	Ghir_A05G013550	Ghir_D04G009190		Ghir_A11G005870	Ghir_A07G003110		Ghir_A12G004120
	Ghir_A05G006830	Ghir_A11G033050		Ghir_D02G018550	Ghir_A12G008740	Ghir_D11G011440	Ghir_A11G034800	Ghir_A05G013580	Ghir_D04G009220		Ghir_A11G006030	Ghir_A07G003380		Ghir_A12G004640
	Ghir_A05G006840	Ghir_A11G033230		Ghir_D02G018740	Ghir_A12G009210	Ghir_D11G013330	Ghir_A11G034970	Ghir_A05G013590	Ghir_D04G009250		Ghir_A11G006440	Ghir_A07G003540		Ghir_A12G004910
	Ghir_A05G006900	Ghir_A11G034790		Ghir_D02G018970	Ghir_A12G009450	Ghir_D11G013360	Ghir_A11G035270	Ghir_A05G013600	Ghir_D04G010990		Ghir_A11G006740	Ghir_A07G003770		Ghir_A12G005230
	Ghir_A05G006920	Ghir_A11G034930		Ghir_D02G019000	Ghir_A12G011580	Ghir_D11G013510	Ghir_A11G035290	Ghir_A05G014040	Ghir_D04G011240		Ghir_A11G006890	Ghir_A07G003970		Ghir_A12G005350
	Ghir_A05G007070	Ghir_A11G035060		Ghir_D02G019450	Ghir_A12G012790	Ghir_D11G014040	Ghir_A11G035780	Ghir_A05G014110	Ghir_D04G011620		Ghir_A11G007030	Ghir_A07G004230		Ghir_A12G006050
	Ghir_A05G007310	Ghir_A11G035140		Ghir_D02G019490	Ghir_A12G013540	Ghir_D11G014730	Ghir_A12G001170	Ghir_A05G014190	Ghir_D04G011650		Ghir_A11G007330	Ghir_A07G004420		Ghir_A12G006150
	Ghir_A05G007320	Ghir_A11G035490		Ghir_D02G019580	Ghir_A12G014890	Ghir_D11G016500	Ghir_A12G001910	Ghir_A05G014300	Ghir_D04G011910		Ghir_A11G007760	Ghir_A07G004680		Ghir_A12G007380
	Ghir_A05G007540	Ghir_A12G000180		Ghir_D02G019860	Ghir_A12G014970	Ghir_D11G017580	Ghir_A12G002170	Ghir_A05G014330	Ghir_D04G012910		Ghir_A11G008030	Ghir_A07G005280		Ghir_A12G007450
	Ghir_A05G007550	Ghir_A12G000310		Ghir_D02G019960	Ghir_A12G015190	Ghir_D11G017750	Ghir_A12G002180	Ghir_A05G014460	Ghir_D04G013200		Ghir_A11G008100	Ghir_A07G005380		Ghir_A12G007580
	Ghir_A05G007600	Ghir_A12G000630		Ghir_D02G020140	Ghir_A12G015280	Ghir_D11G018770	Ghir_A12G003020	Ghir_A05G014650	Ghir_D04G013940		Ghir_A11G008180	Ghir_A07G005600		Ghir_A12G007770
	Ghir_A05G007620	Ghir_A12G000830		Ghir_D02G020290	Ghir_A12G015370	Ghir_D11G019160	Ghir_A12G003190	Ghir_A05G014750	Ghir_D04G015080		Ghir_A11G008250	Ghir_A07G005800		Ghir_A12G008580
	Ghir_A05G007630	Ghir_A12G002570		Ghir_D02G020360	Ghir_A12G016070	Ghir_D11G019280	Ghir_A12G003490	Ghir_A05G014800	Ghir_D04G016670		Ghir_A11G008320	Ghir_A07G005890		Ghir_A12G008960
	Ghir_A05G007720	Ghir_A12G002580		Ghir_D02G020690	Ghir_A12G016560	Ghir_D11G019790	Ghir_A12G004020	Ghir_A05G014830	Ghir_D04G017200		Ghir_A11G009130	Ghir_A07G005970		Ghir_A12G010390
	Ghir_A05G007760	Ghir_A12G002590		Ghir_D02G021480	Ghir_A12G016570	Ghir_D11G021330	Ghir_A12G004030	Ghir_A05G014980	Ghir_D04G018070		Ghir_A11G009400	Ghir_A07G006400		Ghir_A12G010580
	Ghir_A05G007820	Ghir_A12G002620		Ghir_D02G022710	Ghir_A12G017090	Ghir_D11G022260	Ghir_A12G004910	Ghir_A05G015310	Ghir_D04G019320		Ghir_A11G010030	Ghir_A07G006460		Ghir_A12G010690
	Ghir_A05G007850	Ghir_A12G002870		Ghir_D02G023180	Ghir_A12G017620	Ghir_D11G022540	Ghir_A12G005250	Ghir_A05G015390	Ghir_D04G019670		Ghir_A11G010540	Ghir_A07G007070		Ghir_A12G011150
	Ghir_A05G008210	Ghir_A12G003110		Ghir_D02G023510	Ghir_A12G018060	Ghir_D11G023900	Ghir_A12G005530	Ghir_A05G015480	Ghir_D04G019890		Ghir_A11G010600	Ghir_A07G007380		Ghir_A12G011360
	Ghir_A05G008270	Ghir_A12G003330		Ghir_D02G024110	Ghir_A12G018750	Ghir_D11G024270	Ghir_A12G005950	Ghir_A05G015850	Ghir_D05G000740		Ghir_A11G010750	Ghir_A07G007390		Ghir_A12G011600
	Ghir_A05G008370	Ghir_A12G004120		Ghir_D03G000150	Ghir_A12G018820	Ghir_D11G025250	Ghir_A12G006260	Ghir_A05G015890	Ghir_D05G000870		Ghir_A11G010870	Ghir_A07G008110		Ghir_A12G012430
	Ghir_A05G008420	Ghir_A12G006150		Ghir_D03G000160	Ghir_A12G018880	Ghir_D11G025440	Ghir_A12G006680	Ghir_A05G016000	Ghir_D05G000880		Ghir_A11G011530	Ghir_A07G008260		Ghir_A12G012540
	Ghir_A05G008540	Ghir_A12G006280		Ghir_D03G000220	Ghir_A12G018890	Ghir_D11G026350	Ghir_A12G007450	Ghir_A05G016060	Ghir_D05G001090		Ghir_A11G011840	Ghir_A07G008900		Ghir_A12G012740
	Ghir_A05G008570	Ghir_A12G006290		Ghir_D03G000670	Ghir_A12G018950	Ghir_D11G027010	Ghir_A12G007580	Ghir_A05G016170	Ghir_D05G001500		Ghir_A11G013380	Ghir_A07G009070		Ghir_A12G012840
	Ghir_A05G008690	Ghir_A12G006810		Ghir_D03G000770	Ghir_A12G018990	Ghir_D11G027350	Ghir_A12G007720	Ghir_A05G016620	Ghir_D05G001780		Ghir_A11G014190	Ghir_A07G009300		Ghir_A12G013190
	Ghir_A05G008700	Ghir_A12G008500		Ghir_D03G000840	Ghir_A12G019510	Ghir_D11G027730	Ghir_A12G007910	Ghir_A05G016640	Ghir_D05G001870		Ghir_A11G014240	Ghir_A07G009940		Ghir_A12G014990
	Ghir_A05G008770	Ghir_A12G008800		Ghir_D03G001840	Ghir_A12G019540	Ghir_D11G028000	Ghir_A12G008580	Ghir_A05G016650	Ghir_D05G002910		Ghir_A11G014990	Ghir_A07G010030		Ghir_A12G015200
	Ghir_A05G008900	Ghir_A12G008910		Ghir_D03G004800	Ghir_A12G019810	Ghir_D11G028030	Ghir_A12G008960	Ghir_A05G016900	Ghir_D05G003560		Ghir_A11G015400	Ghir_A07G010050		Ghir_A12G015330
	Ghir_A05G008980	Ghir_A12G009070		Ghir_D03G005230	Ghir_A12G020240	Ghir_D11G031100	Ghir_A12G009080	Ghir_A05G016910	Ghir_D05G004580		Ghir_A11G015790	Ghir_A07G010190		Ghir_A12G017630
	Ghir_A05G009090	Ghir_A12G009180		Ghir_D03G005600	Ghir_A12G021230	Ghir_D11G034780	Ghir_A12G009240	Ghir_A05G016930	Ghir_D05G006180		Ghir_A11G015810	Ghir_A07G010400		Ghir_A12G017900
	Ghir_A05G009160	Ghir_A12G009460		Ghir_D03G005980	Ghir_A12G021500	Ghir_D11G036170	Ghir_A12G009390	Ghir_A05G016950	Ghir_D05G006850		Ghir_A11G016610	Ghir_A07G010430		Ghir_A12G018010
	Ghir_A05G009220	Ghir_A12G010390		Ghir_D03G006640	Ghir_A12G021560	Ghir_D11G036410	Ghir_A12G009480	Ghir_A05G017030	Ghir_D05G007550		Ghir_A11G016670	Ghir_A07G010450		Ghir_A12G019000
	Ghir_A05G009280	Ghir_A12G011150		Ghir_D03G007450	Ghir_A12G021700	Ghir_D12G000260	Ghir_A12G010230	Ghir_A05G017160	Ghir_D05G007910		Ghir_A11G017630	Ghir_A07G010720		Ghir_A12G019040
	Ghir_A05G009350	Ghir_A12G011510		Ghir_D03G008140	Ghir_A12G021960	Ghir_D12G001720	Ghir_A12G010490	Ghir_A05G017470	Ghir_D05G008450		Ghir_A11G017670	Ghir_A07G010790		Ghir_A12G019060
	Ghir_A05G009600	Ghir_A12G011610		Ghir_D03G008880	Ghir_A12G022650	Ghir_D12G002270	Ghir_A12G010690	Ghir_A05G017530	Ghir_D05G008800		Ghir_A11G017890	Ghir_A07G010930		Ghir_A12G020440
	Ghir_A05G009650	Ghir_A12G011820		Ghir_D03G009840	Ghir_A12G022750	Ghir_D12G002850	Ghir_A12G011360	Ghir_A05G017720	Ghir_D05G009360		Ghir_A11G018310	Ghir_A07G011250		Ghir_A12G020690
	Ghir_A05G009740	Ghir_A12G011970		Ghir_D03G010080	Ghir_A12G023460	Ghir_D12G003930	Ghir_A12G011530	Ghir_A05G017750	Ghir_D05G009440		Ghir_A11G018390	Ghir_A07G011610		Ghir_A12G021360
	Ghir_A05G009750	Ghir_A12G012540		Ghir_D03G010570	Ghir_A12G024100	Ghir_D12G004890	Ghir_A12G011600	Ghir_A05G017820	Ghir_D05G010020		Ghir_A11G018660	Ghir_A07G011620		Ghir_A12G022520
	Ghir_A05G009940	Ghir_A12G012800		Ghir_D03G011020	Ghir_A12G024300	Ghir_D12G005020	Ghir_A12G012000	Ghir_A05G017970	Ghir_D05G012170		Ghir_A11G019210	Ghir_A07G012120		Ghir_A12G023270
	Ghir_A05G009990	Ghir_A12G013180		Ghir_D03G011320	Ghir_A12G024400	Ghir_D12G005680	Ghir_A12G012710	Ghir_A05G017980	Ghir_D05G012540		Ghir_A11G020500	Ghir_A07G012130		Ghir_A12G024220
	Ghir_A05G010030	Ghir_A12G015720		Ghir_D03G011490	Ghir_A12G024720	Ghir_D12G006210	Ghir_A12G012740	Ghir_A05G018150	Ghir_D05G012570		Ghir_A11G020510	Ghir_A07G012290		Ghir_A12G024900
	Ghir_A05G010170	Ghir_A12G015990		Ghir_D03G011590	Ghir_A12G025060	Ghir_D12G007560	Ghir_A12G012840	Ghir_A05G018200	Ghir_D05G012660		Ghir_A11G021160	Ghir_A07G012360		Ghir_A12G024960
	Ghir_A05G010320	Ghir_A12G016160		Ghir_D03G012470	Ghir_A12G025920	Ghir_D12G008210	Ghir_A12G013190	Ghir_A05G018370	Ghir_D05G013830		Ghir_A11G021390	Ghir_A07G012650		Ghir_A12G025370
	Ghir_A05G010350	Ghir_A12G016190		Ghir_D03G013720	Ghir_A12G026130	Ghir_D12G008910	Ghir_A12G014120	Ghir_A05G018460	Ghir_D05G014170		Ghir_A11G021790	Ghir_A07G013250		Ghir_A12G025650
	Ghir_A05G010380	Ghir_A12G016350		Ghir_D03G013760	Ghir_A12G026780	Ghir_D12G009150	Ghir_A12G017900	Ghir_A05G018650	Ghir_D05G015000		Ghir_A11G022070	Ghir_A07G013390		Ghir_A12G026520
	Ghir_A05G010400	Ghir_A12G016440		Ghir_D03G014060	Ghir_A12G028610	Ghir_D12G010510	Ghir_A12G018010	Ghir_A05G018950	Ghir_D05G016150		Ghir_A11G022230	Ghir_A07G013650		Ghir_A12G026670
	Ghir_A05G010430	Ghir_A12G016660		Ghir_D03G014070	Ghir_A12G028790	Ghir_D12G010830	Ghir_A12G020050	Ghir_A05G019030	Ghir_D05G016170		Ghir_A11G022630	Ghir_A07G013770		Ghir_A12G027160
	Ghir_A05G010590	Ghir_A12G017630		Ghir_D03G014420	Ghir_A13G000240	Ghir_D12G011570	Ghir_A12G020110	Ghir_A05G019090	Ghir_D05G016350		Ghir_A11G022700	Ghir_A07G013810		Ghir_A12G027510
	Ghir_A05G010610	Ghir_A12G017810		Ghir_D03G014520	Ghir_A13G000440	Ghir_D12G013270	Ghir_A12G020210	Ghir_A05G019350	Ghir_D05G016780		Ghir_A11G023280	Ghir_A07G013830		Ghir_A12G027750
	Ghir_A05G010680	Ghir_A12G017990		Ghir_D03G015720	Ghir_A13G000570	Ghir_D12G013280	Ghir_A12G020440	Ghir_A05G019420	Ghir_D05G017830		Ghir_A11G023630	Ghir_A07G013940		Ghir_A12G028110
	Ghir_A05G010850	Ghir_A12G018240		Ghir_D03G016110	Ghir_A13G001120	Ghir_D12G013930	Ghir_A12G020820	Ghir_A05G019470	Ghir_D05G018560		Ghir_A11G023900	Ghir_A07G014030		Ghir_A12G028260
	Ghir_A05G010890	Ghir_A12G018630		Ghir_D03G016400	Ghir_A13G001390	Ghir_D12G013950	Ghir_A12G021120	Ghir_A05G019660	Ghir_D05G018700		Ghir_A11G025420	Ghir_A07G014050		Ghir_A12G028290
	Ghir_A05G010970	Ghir_A12G018670		Ghir_D03G016960	Ghir_A13G001470	Ghir_D12G014210	Ghir_A12G021360	Ghir_A05G019710	Ghir_D05G019380		Ghir_A11G025500	Ghir_A07G014380		Ghir_A12G028500
	Ghir_A05G011280	Ghir_A12G018830		Ghir_D03G017180	Ghir_A13G001930	Ghir_D12G014480	Ghir_A12G022240	Ghir_A05G019940	Ghir_D05G020560		Ghir_A11G025540	Ghir_A07G014390		Ghir_A12G028660
	Ghir_A05G011320	Ghir_A12G019000		Ghir_D03G017500	Ghir_A13G002010	Ghir_D12G015650	Ghir_A12G022520	Ghir_A05G020010	Ghir_D05G021440		Ghir_A11G025680	Ghir_A07G014440		Ghir_A13G000040
	Ghir_A05G011410	Ghir_A12G019040		Ghir_D03G017510	Ghir_A13G002710	Ghir_D12G015940	Ghir_A12G022810	Ghir_A05G020070	Ghir_D05G022420		Ghir_A11G026160	Ghir_A07G014470		Ghir_A13G000490
	Ghir_A05G011660	Ghir_A12G019530		Ghir_D03G017560	Ghir_A13G002720	Ghir_D12G017770	Ghir_A12G023230	Ghir_A05G020330	Ghir_D05G022590		Ghir_A11G028600	Ghir_A07G014770		Ghir_A13G000740
	Ghir_A05G011710	Ghir_A12G019870		Ghir_D03G018580	Ghir_A13G002820	Ghir_D12G018390	Ghir_A12G023270	Ghir_A05G020680	Ghir_D05G022660		Ghir_A11G028840	Ghir_A07G014810		Ghir_A13G001140
	Ghir_A05G011940	Ghir_A12G019970		Ghir_D03G018880	Ghir_A13G002890	Ghir_D12G018400	Ghir_A12G023530	Ghir_A05G020700	Ghir_D05G022710		Ghir_A11G029070	Ghir_A07G015050		Ghir_A13G001250
	Ghir_A05G012060	Ghir_A12G020640		Ghir_D03G019130	Ghir_A13G003450	Ghir_D12G020010	Ghir_A12G023910	Ghir_A05G020760	Ghir_D05G022800		Ghir_A11G029270	Ghir_A07G015070		Ghir_A13G001270
	Ghir_A05G012210	Ghir_A12G021470		Ghir_D04G000530	Ghir_A13G003620	Ghir_D12G022090	Ghir_A12G024020	Ghir_A05G020880	Ghir_D05G023060		Ghir_A11G029370	Ghir_A07G015240		Ghir_A13G002200
	Ghir_A05G012220	Ghir_A12G022250		Ghir_D04G000730	Ghir_A13G003870	Ghir_D12G022130	Ghir_A12G024960	Ghir_A05G020950	Ghir_D05G023190		Ghir_A11G029410	Ghir_A07G015550		Ghir_A13G002800
	Ghir_A05G012330	Ghir_A12G022700		Ghir_D04G002030	Ghir_A13G004100	Ghir_D12G022520	Ghir_A12G025010	Ghir_A05G021040	Ghir_D05G023270		Ghir_A11G029710	Ghir_A07G015580		Ghir_A13G002860
	Ghir_A05G012340	Ghir_A12G022800		Ghir_D04G002280	Ghir_A13G004240	Ghir_D12G025180	Ghir_A12G025370	Ghir_A05G021050	Ghir_D05G023530		Ghir_A11G029830	Ghir_A07G015760		Ghir_A13G003220
	Ghir_A05G012480	Ghir_A12G023030		Ghir_D04G002490	Ghir_A13G005200	Ghir_D12G025770	Ghir_A12G025650	Ghir_A05G021130	Ghir_D05G024110		Ghir_A11G030220	Ghir_A07G015790		Ghir_A13G004060
	Ghir_A05G012550	Ghir_A12G024280		Ghir_D04G002520	Ghir_A13G005230	Ghir_D12G025880	Ghir_A12G026150	Ghir_A05G021150	Ghir_D05G024600		Ghir_A11G030660	Ghir_A07G016240		Ghir_A13G004520
	Ghir_A05G012610	Ghir_A12G024590		Ghir_D04G004100	Ghir_A13G005320	Ghir_D12G025910	Ghir_A12G026520	Ghir_A05G021250	Ghir_D05G024700		Ghir_A11G031350	Ghir_A07G016520		Ghir_A13G004710
	Ghir_A05G012660	Ghir_A12G024690		Ghir_D04G004110	Ghir_A13G005350	Ghir_D12G026800	Ghir_A12G026540	Ghir_A05G021440	Ghir_D05G025130		Ghir_A11G031410	Ghir_A07G016980		Ghir_A13G004990
	Ghir_A05G012760	Ghir_A12G025380		Ghir_D04G004720	Ghir_A13G005480	Ghir_D12G028850	Ghir_A12G026670	Ghir_A05G021520	Ghir_D05G025300		Ghir_A11G032190	Ghir_A07G017150		Ghir_A13G005420
	Ghir_A05G012860	Ghir_A12G025790		Ghir_D04G006080	Ghir_A13G005780	Ghir_D12G029710	Ghir_A12G027160	Ghir_A05G021770	Ghir_D05G025460		Ghir_A11G032240	Ghir_A07G017240		Ghir_A13G005520
	Ghir_A05G013060	Ghir_A12G025960		Ghir_D04G006490	Ghir_A13G005930	Ghir_D13G000850	Ghir_A12G027620	Ghir_A05G021900	Ghir_D05G025580		Ghir_A11G032560	Ghir_A07G017550		Ghir_A13G005610
	Ghir_A05G013280	Ghir_A12G026030		Ghir_D04G006500	Ghir_A13G006110	Ghir_D13G001470	Ghir_A12G027750	Ghir_A05G022260	Ghir_D05G027190		Ghir_A11G033250	Ghir_A07G017640		Ghir_A13G006180
	Ghir_A05G013330	Ghir_A12G027080		Ghir_D04G006680	Ghir_A13G006370	Ghir_D13G002120	Ghir_A12G027840	Ghir_A05G022300	Ghir_D05G027840		Ghir_A11G033800	Ghir_A07G017650		Ghir_A13G007380
	Ghir_A05G013580	Ghir_A12G027260		Ghir_D04G007240	Ghir_A13G007030	Ghir_D13G004250	Ghir_A12G028930	Ghir_A05G022430	Ghir_D05G028410		Ghir_A11G033940	Ghir_A07G017730		Ghir_A13G007570
	Ghir_A05G013590	Ghir_A12G027290		Ghir_D04G007780	Ghir_A13G007330	Ghir_D13G004480	Ghir_A13G000160	Ghir_A05G022670	Ghir_D05G028770		Ghir_A11G034270	Ghir_A07G017750		Ghir_A13G007790
	Ghir_A05G013600	Ghir_A12G027510		Ghir_D04G007840	Ghir_A13G007430	Ghir_D13G004840	Ghir_A13G000610	Ghir_A05G022680	Ghir_D05G029330		Ghir_A11G034470	Ghir_A07G017910		Ghir_A13G008440
	Ghir_A05G013690	Ghir_A12G028170		Ghir_D04G008120	Ghir_A13G007640	Ghir_D13G005000	Ghir_A13G000860	Ghir_A05G022780	Ghir_D05G030350		Ghir_A11G034900	Ghir_A07G018000		Ghir_A13G009040
	Ghir_A05G013800	Ghir_A12G028290		Ghir_D04G009250	Ghir_A13G007990	Ghir_D13G006070	Ghir_A13G001250	Ghir_A05G023070	Ghir_D05G031800		Ghir_A11G034990	Ghir_A07G018220		Ghir_A13G010200
	Ghir_A05G013930	Ghir_A12G028300		Ghir_D04G009450	Ghir_A13G008160	Ghir_D13G006300	Ghir_A13G001570	Ghir_A05G023090	Ghir_D05G031980		Ghir_A11G035230	Ghir_A07G018250		Ghir_A13G010390
	Ghir_A05G013960	Ghir_A12G028500		Ghir_D04G009990	Ghir_A13G008500	Ghir_D13G007240	Ghir_A13G002190	Ghir_A05G023120	Ghir_D05G035110		Ghir_A11G035290	Ghir_A07G018280		Ghir_A13G014180
	Ghir_A05G014110	Ghir_A12G028580		Ghir_D04G010640	Ghir_A13G008610	Ghir_D13G007900	Ghir_A13G002320	Ghir_A05G023330	Ghir_D05G035200		Ghir_A11G035990	Ghir_A07G018410		Ghir_A13G014200
	Ghir_A05G014170	Ghir_A12G028630		Ghir_D04G010680	Ghir_A13G009050	Ghir_D13G008890	Ghir_A13G002860	Ghir_A05G023380	Ghir_D05G036580		Ghir_A12G000740	Ghir_A07G018620		Ghir_A13G014410
	Ghir_A05G014190	Ghir_A12G028660		Ghir_D04G011630	Ghir_A13G009380	Ghir_D13G009310	Ghir_A13G003180	Ghir_A05G023600	Ghir_D05G036740		Ghir_A12G001340	Ghir_A07G018680		Ghir_A13G014500
	Ghir_A05G014300	Ghir_A13G000480		Ghir_D04G011950	Ghir_A13G009570	Ghir_D13G010030	Ghir_A13G003230	Ghir_A05G023720	Ghir_D05G038060		Ghir_A12G001600	Ghir_A07G019540		Ghir_A13G014750
	Ghir_A05G014340	Ghir_A13G000740		Ghir_D04G012080	Ghir_A13G009740	Ghir_D13G012280	Ghir_A13G003260	Ghir_A05G024020	Ghir_D06G000020		Ghir_A12G002720	Ghir_A07G019550		Ghir_A13G014950
	Ghir_A05G014560	Ghir_A13G000970		Ghir_D04G012160	Ghir_A13G010470	Ghir_D13G015210	Ghir_A13G003800	Ghir_A05G024030	Ghir_D06G000330		Ghir_A12G002870	Ghir_A07G019940		Ghir_A13G015900
	Ghir_A05G014600	Ghir_A13G001270		Ghir_D04G012500	Ghir_A13G011370	Ghir_D13G016550	Ghir_A13G003820	Ghir_A05G024170	Ghir_D06G001570		Ghir_A12G003020	Ghir_A07G020020		Ghir_A13G016600
	Ghir_A05G014650	Ghir_A13G001310		Ghir_D04G012890	Ghir_A13G011420	Ghir_D13G016560	Ghir_A13G004370	Ghir_A05G024240	Ghir_D06G001950		Ghir_A12G003110	Ghir_A07G020220		Ghir_A13G017160
	Ghir_A05G014750	Ghir_A13G001360		Ghir_D04G013230	Ghir_A13G011450	Ghir_D13G016830	Ghir_A13G004520	Ghir_A05G024320	Ghir_D06G002060		Ghir_A12G003890	Ghir_A07G020300		Ghir_A13G017270
	Ghir_A05G014800	Ghir_A13G001430		Ghir_D04G013820	Ghir_A13G011670	Ghir_D13G018760	Ghir_A13G004940	Ghir_A05G024340	Ghir_D06G002280		Ghir_A12G003970	Ghir_A07G020530		Ghir_A13G017820
	Ghir_A05G014830	Ghir_A13G002200		Ghir_D04G014230	Ghir_A13G011920	Ghir_D13G018850	Ghir_A13G004990	Ghir_A05G024580	Ghir_D06G003000		Ghir_A12G004220	Ghir_A07G021060		Ghir_A13G018150
	Ghir_A05G014860	Ghir_A13G002360		Ghir_D04G014360	Ghir_A13G011980	Ghir_D13G019060	Ghir_A13G005100	Ghir_A05G024640	Ghir_D06G003410		Ghir_A12G004230	Ghir_A07G021110		Ghir_A13G018210
	Ghir_A05G015050	Ghir_A13G002690		Ghir_D04G014630	Ghir_A13G012940	Ghir_D13G020080	Ghir_A13G005420	Ghir_A05G025110	Ghir_D06G003440		Ghir_A12G004690	Ghir_A07G021300		Ghir_A13G018370
	Ghir_A05G015060	Ghir_A13G002940		Ghir_D04G016290	Ghir_A13G013290	Ghir_D13G021770	Ghir_A13G005520	Ghir_A05G025460	Ghir_D06G003590		Ghir_A12G005250	Ghir_A07G021460		Ghir_A13G018740
	Ghir_A05G015150	Ghir_A13G003150		Ghir_D04G016470	Ghir_A13G013370	Ghir_D13G023290	Ghir_A13G005610	Ghir_A05G025680	Ghir_D06G003720		Ghir_A12G005450	Ghir_A07G021760		Ghir_A13G019040
	Ghir_A05G015390	Ghir_A13G003280		Ghir_D04G016770	Ghir_A13G014300	Ghir_D13G023510	Ghir_A13G005620	Ghir_A05G025690	Ghir_D06G004220		Ghir_A12G005530	Ghir_A07G021800		Ghir_A13G019060
	Ghir_A05G015480	Ghir_A13G003660		Ghir_D04G017110	Ghir_A13G014740	Ghir_D13G024110	Ghir_A13G006270	Ghir_A05G025770	Ghir_D06G004700		Ghir_A12G005760	Ghir_A07G022020		Ghir_A13G019280
	Ghir_A05G015650	Ghir_A13G004310		Ghir_D04G017800	Ghir_A13G014760	Ghir_D13G024780	Ghir_A13G006860	Ghir_A05G025830	Ghir_D06G004820		Ghir_A12G005950	Ghir_A07G022030		Ghir_A13G019310
	Ghir_A05G015850	Ghir_A13G006180		Ghir_D04G018320	Ghir_A13G015030	Ghir_D13G025180	Ghir_A13G007100	Ghir_A05G026000	Ghir_D06G005530		Ghir_A12G006020	Ghir_A07G022060		Ghir_A13G019390
	Ghir_A05G016000	Ghir_A13G006550		Ghir_D04G018430	Ghir_A13G015130	Ghir_D13G025600	Ghir_A13G007790	Ghir_A05G026030	Ghir_D06G005710		Ghir_A12G006040	Ghir_A07G022210		Ghir_A13G019450
	Ghir_A05G016060	Ghir_A13G007570		Ghir_D04G018530	Ghir_A13G015610	Ghir_Scaffold945G000010	Ghir_A13G008010	Ghir_A05G026320	Ghir_D06G005760		Ghir_A12G006210	Ghir_A07G022310		Ghir_A13G019560
	Ghir_A05G016170	Ghir_A13G008600		Ghir_D04G019140	Ghir_A13G015810		Ghir_A13G008170	Ghir_A05G026530	Ghir_D06G007750		Ghir_A12G006260	Ghir_A07G022520		Ghir_A13G020000
	Ghir_A05G016550	Ghir_A13G010200		Ghir_D04G019250	Ghir_A13G018430		Ghir_A13G008440	Ghir_A05G026680	Ghir_D06G007940		Ghir_A12G006680	Ghir_A07G022600		Ghir_A13G020430
	Ghir_A05G016590	Ghir_A13G010390		Ghir_D04G019520	Ghir_A13G019030		Ghir_A13G009040	Ghir_A05G026760	Ghir_D06G008490		Ghir_A12G007910	Ghir_A07G022770		Ghir_A13G020760
	Ghir_A05G016620	Ghir_A13G010510		Ghir_D04G020270	Ghir_A13G019420		Ghir_A13G010420	Ghir_A05G026810	Ghir_D06G009080		Ghir_A12G008050	Ghir_A07G023450		Ghir_A13G020840
	Ghir_A05G016640	Ghir_A13G012460		Ghir_D05G000230	Ghir_A13G019780		Ghir_A13G010440	Ghir_A05G027120	Ghir_D06G010650		Ghir_A12G008090	Ghir_A07G023480		Ghir_A13G021300
	Ghir_A05G016650	Ghir_A13G012630		Ghir_D05G001000	Ghir_A13G020310		Ghir_A13G010600	Ghir_A05G027270	Ghir_D06G011470		Ghir_A12G009260	Ghir_A07G023590		Ghir_A13G021680
	Ghir_A05G016900	Ghir_A13G012730		Ghir_D05G001090	Ghir_A13G020550		Ghir_A13G010880	Ghir_A05G027330	Ghir_D06G011510		Ghir_A12G009390	Ghir_A07G023880		Ghir_A13G021960
	Ghir_A05G016910	Ghir_A13G012760		Ghir_D05G001270	Ghir_A13G020680		Ghir_A13G011340	Ghir_A05G027340	Ghir_D06G013830		Ghir_A12G009700	Ghir_A07G023890		Ghir_A13G021980
	Ghir_A05G016950	Ghir_A13G014320		Ghir_D05G001970	Ghir_A13G020950		Ghir_A13G011870	Ghir_A05G027350	Ghir_D06G013890		Ghir_A12G010230	Ghir_A07G023990		Ghir_A13G022080
	Ghir_A05G017000	Ghir_A13G014420		Ghir_D05G002620	Ghir_A13G021290		Ghir_A13G013150	Ghir_A05G027440	Ghir_D06G014600		Ghir_A12G010370	Ghir_A07G024060		Ghir_A13G023470
	Ghir_A05G017030	Ghir_A13G014750		Ghir_D05G003390	Ghir_A13G021450		Ghir_A13G013180	Ghir_A05G027760	Ghir_D06G014900		Ghir_A12G011030	Ghir_A07G024120		Ghir_A13G023750
	Ghir_A05G017160	Ghir_A13G015260		Ghir_D05G003410	Ghir_A13G021690		Ghir_A13G013440	Ghir_A05G028110	Ghir_D06G015920		Ghir_A12G011960	Ghir_A07G024140		Ghir_A13G024150
	Ghir_A05G017470	Ghir_A13G015900		Ghir_D05G005360	Ghir_A13G021810		Ghir_A13G014180	Ghir_A05G028240	Ghir_D06G016440		Ghir_A12G012000	Ghir_A07G024290		Ghir_A13G024720
	Ghir_A05G017580	Ghir_A13G017270		Ghir_D05G006860	Ghir_A13G022410		Ghir_A13G014200	Ghir_A05G028420	Ghir_D06G017480		Ghir_A12G012450	Ghir_A07G024420		Ghir_A13G024810
	Ghir_A05G017750	Ghir_A13G017570		Ghir_D05G007240	Ghir_A13G022560		Ghir_A13G014500	Ghir_A05G028560	Ghir_D06G017860		Ghir_A12G012710	Ghir_A07G024530		Ghir_D01G000090
	Ghir_A05G017820	Ghir_A13G017690		Ghir_D05G007690	Ghir_A13G022910		Ghir_A13G014950	Ghir_A05G028590	Ghir_D06G018390		Ghir_A12G012730	Ghir_A07G025040		Ghir_D01G000100
	Ghir_A05G017890	Ghir_A13G018760		Ghir_D05G007990	Ghir_A13G023130		Ghir_A13G015530	Ghir_A05G028700	Ghir_D06G019210		Ghir_A12G014000	Ghir_A07G025210		Ghir_D01G000240
	Ghir_A05G018130	Ghir_A13G019040		Ghir_D05G008090	Ghir_A13G023220		Ghir_A13G016030	Ghir_A05G028720	Ghir_D06G020070		Ghir_A12G014010	Ghir_A08G000370		Ghir_D01G000390
	Ghir_A05G018150	Ghir_A13G019480		Ghir_D05G008720	Ghir_A13G023620		Ghir_A13G016600	Ghir_A05G028730	Ghir_D06G020200		Ghir_A12G014120	Ghir_A08G000910		Ghir_D01G000490
	Ghir_A05G018200	Ghir_A13G019640		Ghir_D05G009050	Ghir_A13G023730		Ghir_A13G017710	Ghir_A05G028870	Ghir_D06G020210		Ghir_A12G014330	Ghir_A08G000920		Ghir_D01G001280
	Ghir_A05G018370	Ghir_A13G020220		Ghir_D05G009490	Ghir_A13G024110		Ghir_A13G018150	Ghir_A05G028920	Ghir_D06G020970		Ghir_A12G014400	Ghir_A08G000960		Ghir_D01G001380
	Ghir_A05G018460	Ghir_A13G020760		Ghir_D05G010020	Ghir_A13G024520		Ghir_A13G018210	Ghir_A05G029100	Ghir_D06G021630		Ghir_A12G015570	Ghir_A08G001430		Ghir_D01G001600
	Ghir_A05G018650	Ghir_A13G020870		Ghir_D05G010060	Ghir_D01G000220		Ghir_A13G018260	Ghir_A05G029180	Ghir_D06G022000		Ghir_A12G015610	Ghir_A08G001620		Ghir_D01G001670
	Ghir_A05G018750	Ghir_A13G020940		Ghir_D05G010330	Ghir_D01G000340		Ghir_A13G018370	Ghir_A05G029290	Ghir_D06G022450		Ghir_A12G015720	Ghir_A08G001790		Ghir_D01G002250
	Ghir_A05G018860	Ghir_A13G021600		Ghir_D05G010740	Ghir_D01G000520		Ghir_A13G018400	Ghir_A05G029350	Ghir_D06G022620		Ghir_A12G015780	Ghir_A08G002210		Ghir_D01G002360
	Ghir_A05G018890	Ghir_A13G021680		Ghir_D05G011410	Ghir_D01G000750		Ghir_A13G018590	Ghir_A05G029410	Ghir_D06G022670		Ghir_A12G015880	Ghir_A08G002220		Ghir_D01G002440
	Ghir_A05G018930	Ghir_A13G021850		Ghir_D05G011580	Ghir_D01G001010		Ghir_A13G019280	Ghir_A05G029970	Ghir_D06G022710		Ghir_A12G015960	Ghir_A08G002280		Ghir_D01G002750
	Ghir_A05G018950	Ghir_A13G022540		Ghir_D05G011640	Ghir_D01G001760		Ghir_A13G019390	Ghir_A05G030190	Ghir_D06G023090		Ghir_A12G016540	Ghir_A08G002620		Ghir_D01G002760
	Ghir_A05G019030	Ghir_A13G023570		Ghir_D05G012100	Ghir_D01G001880		Ghir_A13G019560	Ghir_A05G030240	Ghir_D06G023290		Ghir_A12G019140	Ghir_A08G003660		Ghir_D01G003550
	Ghir_A05G019090	Ghir_A13G024720		Ghir_D05G012160	Ghir_D01G002060		Ghir_A13G019790	Ghir_A05G030300	Ghir_D06G023650		Ghir_A12G019480	Ghir_A08G004030		Ghir_D01G003820
	Ghir_A05G019350	Ghir_D01G000070		Ghir_D05G014090	Ghir_D01G002100		Ghir_A13G020270	Ghir_A05G030520	Ghir_D07G000330		Ghir_A12G019580	Ghir_A08G004520		Ghir_D01G005180
	Ghir_A05G019420	Ghir_D01G000350		Ghir_D05G015000	Ghir_D01G002260		Ghir_A13G020430	Ghir_A05G030860	Ghir_D07G000490		Ghir_A12G020050	Ghir_A08G004630		Ghir_D01G006060
	Ghir_A05G019470	Ghir_D01G000370		Ghir_D05G015020	Ghir_D01G002430		Ghir_A13G020660	Ghir_A05G030940	Ghir_D07G001870		Ghir_A12G020210	Ghir_A08G004680		Ghir_D01G006070
	Ghir_A05G019660	Ghir_D01G000550		Ghir_D05G015490	Ghir_D01G002870		Ghir_A13G020820	Ghir_A05G031570	Ghir_D07G002000		Ghir_A12G020820	Ghir_A08G004760		Ghir_D01G006540
	Ghir_A05G019710	Ghir_D01G000720		Ghir_D05G016450	Ghir_D01G005000		Ghir_A13G021270	Ghir_A05G031920	Ghir_D07G002190		Ghir_A12G021080	Ghir_A08G004920		Ghir_D01G006720
	Ghir_A05G019880	Ghir_D01G001080		Ghir_D05G016810	Ghir_D01G005240		Ghir_A13G021960	Ghir_A05G032100	Ghir_D07G002230		Ghir_A12G021120	Ghir_A08G005000		Ghir_D01G007880
	Ghir_A05G019940	Ghir_D01G001600		Ghir_D05G016970	Ghir_D01G005360		Ghir_A13G021980	Ghir_A05G032180	Ghir_D07G002540		Ghir_A12G021160	Ghir_A08G005150		Ghir_D01G008110
	Ghir_A05G019960	Ghir_D01G001980		Ghir_D05G017540	Ghir_D01G005440		Ghir_A13G022060	Ghir_A05G032370	Ghir_D07G003080		Ghir_A12G021640	Ghir_A08G005370		Ghir_D01G008620
	Ghir_A05G020010	Ghir_D01G002410		Ghir_D05G017700	Ghir_D01G005790		Ghir_A13G022080	Ghir_A05G032590	Ghir_D07G003860		Ghir_A12G021800	Ghir_A08G005550		Ghir_D01G009710
	Ghir_A05G020070	Ghir_D01G002420		Ghir_D05G018020	Ghir_D01G005980		Ghir_A13G022300	Ghir_A05G032910	Ghir_D07G004140		Ghir_A12G022090	Ghir_A08G005570		Ghir_D01G010140
	Ghir_A05G020330	Ghir_D01G002440		Ghir_D05G018760	Ghir_D01G006420		Ghir_A13G023330	Ghir_A05G032920	Ghir_D07G005480		Ghir_A12G022240	Ghir_A08G006130		Ghir_D01G010250
	Ghir_A05G020380	Ghir_D01G002550		Ghir_D05G018860	Ghir_D01G006640		Ghir_A13G023470	Ghir_A05G033520	Ghir_D07G007120		Ghir_A12G022490	Ghir_A08G006410		Ghir_D01G010790
	Ghir_A05G020680	Ghir_D01G002580		Ghir_D05G019380	Ghir_D01G006930		Ghir_A13G023560	Ghir_A05G033570	Ghir_D07G007720		Ghir_A12G022800	Ghir_A08G006660		Ghir_D01G011000
	Ghir_A05G020760	Ghir_D01G002920		Ghir_D05G019460	Ghir_D01G008080		Ghir_A13G023830	Ghir_A05G033590	Ghir_D07G008070		Ghir_A12G023530	Ghir_A08G006740		Ghir_D01G011050
	Ghir_A05G020880	Ghir_D01G003730		Ghir_D05G019570	Ghir_D01G009380		Ghir_A13G023850	Ghir_A05G033670	Ghir_D07G008130		Ghir_A12G023720	Ghir_A08G006820		Ghir_D01G011150
	Ghir_A05G020950	Ghir_D01G004960		Ghir_D05G019640	Ghir_D01G010020		Ghir_A13G024100	Ghir_A05G033680	Ghir_D07G008830		Ghir_A12G023910	Ghir_A08G006920		Ghir_D01G011190
	Ghir_A05G021040	Ghir_D01G006140		Ghir_D05G020620	Ghir_D01G010070		Ghir_A13G024150	Ghir_A05G033910	Ghir_D07G009000		Ghir_A12G024020	Ghir_A08G007160		Ghir_D01G011230
	Ghir_A05G021050	Ghir_D01G006430		Ghir_D05G021340	Ghir_D01G010560		Ghir_A13G024330	Ghir_A05G034080	Ghir_D07G009040		Ghir_A12G024370	Ghir_A08G007270		Ghir_D01G012450
	Ghir_A05G021130	Ghir_D01G006730		Ghir_D05G021380	Ghir_D01G010690		Ghir_A13G024990	Ghir_A05G034120	Ghir_D07G009640		Ghir_A12G024690	Ghir_A08G007280		Ghir_D01G012870
	Ghir_A05G021150	Ghir_D01G007370		Ghir_D05G022120	Ghir_D01G010870		Ghir_D01G000080	Ghir_A05G034260	Ghir_D07G009890		Ghir_A12G025200	Ghir_A08G007430		Ghir_D01G013420
	Ghir_A05G021160	Ghir_D01G007700		Ghir_D05G022780	Ghir_D01G010970		Ghir_D01G000240	Ghir_A05G034280	Ghir_D07G010740		Ghir_A12G025380	Ghir_A08G007650		Ghir_D01G013500
	Ghir_A05G021250	Ghir_D01G007870		Ghir_D05G022800	Ghir_D01G011460		Ghir_D01G000490	Ghir_A05G034560	Ghir_D07G011100		Ghir_A12G025690	Ghir_A08G008470		Ghir_D01G013520
	Ghir_A05G021440	Ghir_D01G008110		Ghir_D05G023070	Ghir_D01G012430		Ghir_D01G000630	Ghir_A05G034730	Ghir_D07G011270		Ghir_A12G026080	Ghir_A08G008530		Ghir_D01G015390
	Ghir_A05G021520	Ghir_D01G008500		Ghir_D05G023750	Ghir_D01G012880		Ghir_D01G000780	Ghir_A05G034800	Ghir_D07G011850		Ghir_A12G026160	Ghir_A08G008770		Ghir_D01G016280
	Ghir_A05G021770	Ghir_D01G008620		Ghir_D05G023810	Ghir_D01G012910		Ghir_D01G001190	Ghir_A05G035050	Ghir_D07G011960		Ghir_A12G026630	Ghir_A08G008860		Ghir_D01G016320
	Ghir_A05G022430	Ghir_D01G009400		Ghir_D05G023950	Ghir_D01G013070		Ghir_D01G001380	Ghir_A05G035290	Ghir_D07G015440		Ghir_A12G026880	Ghir_A08G009130		Ghir_D01G016430
	Ghir_A05G022670	Ghir_D01G009520		Ghir_D05G023990	Ghir_D01G013440		Ghir_D01G001670	Ghir_A05G035380	Ghir_D07G015610		Ghir_A12G027620	Ghir_A08G009450		Ghir_D01G016510
	Ghir_A05G022680	Ghir_D01G009900		Ghir_D05G024010	Ghir_D01G014130		Ghir_D01G001690	Ghir_A05G035710	Ghir_D07G016490		Ghir_A12G027780	Ghir_A08G009590		Ghir_D01G017100
	Ghir_A05G022780	Ghir_D01G010050		Ghir_D05G024690	Ghir_D01G014210		Ghir_D01G002320	Ghir_A05G035950	Ghir_D07G016750		Ghir_A12G027870	Ghir_A08G009670		Ghir_D01G017440
	Ghir_A05G022850	Ghir_D01G010250		Ghir_D05G024990	Ghir_D01G014470		Ghir_D01G002350	Ghir_A05G036050	Ghir_D07G018700		Ghir_A12G028170	Ghir_A08G009770		Ghir_D01G017980
	Ghir_A05G022940	Ghir_D01G010330		Ghir_D05G025170	Ghir_D01G015130		Ghir_D01G002360	Ghir_A05G036330	Ghir_D07G018780		Ghir_A12G028330	Ghir_A08G009790		Ghir_D01G018270
	Ghir_A05G023070	Ghir_D01G010790		Ghir_D05G025460	Ghir_D01G015300		Ghir_D01G002750	Ghir_A05G036500	Ghir_D07G018910		Ghir_A12G028530	Ghir_A08G009820		Ghir_D01G018710
	Ghir_A05G023090	Ghir_D01G011130		Ghir_D05G027130	Ghir_D01G016200		Ghir_D01G002760	Ghir_A05G036510	Ghir_D07G019670		Ghir_A12G029150	Ghir_A08G009870		Ghir_D01G019860
	Ghir_A05G023120	Ghir_D01G011860		Ghir_D05G027440	Ghir_D01G016570		Ghir_D01G003550	Ghir_A05G036520	Ghir_D07G020390		Ghir_A13G001300	Ghir_A08G009930		Ghir_D01G019950
	Ghir_A05G023300	Ghir_D01G012450		Ghir_D05G027680	Ghir_D01G017360		Ghir_D01G003750	Ghir_A05G036600	Ghir_D07G020490		Ghir_A13G001570	Ghir_A08G010160		Ghir_D01G020180
	Ghir_A05G023450	Ghir_D01G014010		Ghir_D05G027750	Ghir_D01G017600		Ghir_D01G003820	Ghir_A05G036620	Ghir_D07G020560		Ghir_A13G002100	Ghir_A08G010180		Ghir_D01G020460
	Ghir_A05G023550	Ghir_D01G015140		Ghir_D05G027840	Ghir_D01G017660		Ghir_D01G004710	Ghir_A05G036700	Ghir_D07G020590		Ghir_A13G002130	Ghir_A08G010970		Ghir_D01G020820
	Ghir_A05G023600	Ghir_D01G015260		Ghir_D05G027880	Ghir_D01G017700		Ghir_D01G006060	Ghir_A05G036750	Ghir_D07G020820		Ghir_A13G002190	Ghir_A08G011260		Ghir_D01G021030
	Ghir_A05G023650	Ghir_D01G015360		Ghir_D05G028060	Ghir_D01G017810		Ghir_D01G006070	Ghir_A05G036910	Ghir_D07G021550		Ghir_A13G002370	Ghir_A08G011310		Ghir_D01G021590
	Ghir_A05G023670	Ghir_D01G015370		Ghir_D05G028160	Ghir_D01G018510		Ghir_D01G006280	Ghir_A05G036930	Ghir_D07G022680		Ghir_A13G002570	Ghir_A08G011550		Ghir_D01G021670
	Ghir_A05G023720	Ghir_D01G015700		Ghir_D05G028390	Ghir_D01G019460		Ghir_D01G006540	Ghir_A05G037160	Ghir_D07G024400		Ghir_A13G003130	Ghir_A08G012110		Ghir_D01G022360
	Ghir_A05G024020	Ghir_D01G016510		Ghir_D05G028530	Ghir_D01G019930		Ghir_D01G006720	Ghir_A05G037180	Ghir_D07G024730		Ghir_A13G003150	Ghir_A08G012720		Ghir_D01G022370
	Ghir_A05G024030	Ghir_D01G017060		Ghir_D05G029420	Ghir_D01G020370		Ghir_D01G007270	Ghir_A05G037260	Ghir_D07G025270		Ghir_A13G003180	Ghir_A08G012860		Ghir_D01G022380
	Ghir_A05G024170	Ghir_D01G018530		Ghir_D05G029880	Ghir_D01G020370		Ghir_D01G007320	Ghir_A05G037420	Ghir_D08G000170		Ghir_A13G003260	Ghir_A08G012880		Ghir_D01G022390
	Ghir_A05G024230	Ghir_D01G019590		Ghir_D05G030220	Ghir_D01G020960		Ghir_D01G007800	Ghir_A05G037490	Ghir_D08G001270		Ghir_A13G003800	Ghir_A08G013190		Ghir_D01G022400
	Ghir_A05G024240	Ghir_D01G019800		Ghir_D05G030840	Ghir_D01G021000		Ghir_D01G009890	Ghir_A05G037560	Ghir_D08G002410		Ghir_A13G003820	Ghir_A08G013730		Ghir_D01G022860
	Ghir_A05G024320	Ghir_D01G020270		Ghir_D05G031050	Ghir_D01G021220		Ghir_D01G009950	Ghir_A05G037870	Ghir_D08G002560		Ghir_A13G004130	Ghir_A08G013770		Ghir_D01G022880
	Ghir_A05G024340	Ghir_D01G020580		Ghir_D05G031190	Ghir_D01G021340		Ghir_D01G010140	Ghir_A05G038050	Ghir_D08G003010		Ghir_A13G004160	Ghir_A08G014060		Ghir_D01G023120
	Ghir_A05G025110	Ghir_D01G021030		Ghir_D05G032100	Ghir_D01G021500		Ghir_D01G010260	Ghir_A05G038060	Ghir_D08G003030		Ghir_A13G004370	Ghir_A08G014120		Ghir_D01G023800
	Ghir_A05G025440	Ghir_D01G021590		Ghir_D05G033490	Ghir_D01G021610		Ghir_D01G011000	Ghir_A05G038310	Ghir_D08G003730		Ghir_A13G004630	Ghir_A08G014170		Ghir_D01G023980
	Ghir_A05G025460	Ghir_D01G021930		Ghir_D05G033810	Ghir_D01G021850		Ghir_D01G011190	Ghir_A05G038410	Ghir_D08G003840		Ghir_A13G004940	Ghir_A08G014190		Ghir_D02G000160
	Ghir_A05G025680	Ghir_D01G022380		Ghir_D05G034080	Ghir_D01G021870		Ghir_D01G011230	Ghir_A05G038520	Ghir_D08G003930		Ghir_A13G005250	Ghir_A08G014350		Ghir_D02G000680
	Ghir_A05G025690	Ghir_D01G022400		Ghir_D05G034340	Ghir_D01G022430		Ghir_D01G011430	Ghir_A05G038540	Ghir_D08G004480		Ghir_A13G005270	Ghir_A08G014480		Ghir_D02G003370
	Ghir_A05G025770	Ghir_D01G023120		Ghir_D05G035030	Ghir_D01G022570		Ghir_D01G011590	Ghir_A05G038580	Ghir_D08G004680		Ghir_A13G005900	Ghir_A08G014530		Ghir_D02G003730
	Ghir_A05G025830	Ghir_D02G000670		Ghir_D05G035230	Ghir_D01G022640		Ghir_D01G012870	Ghir_A05G038830	Ghir_D08G004830		Ghir_A13G006860	Ghir_A08G016050		Ghir_D02G003770
	Ghir_A05G026000	Ghir_D02G001480		Ghir_D05G037420	Ghir_D01G022910		Ghir_D01G013420	Ghir_A05G038870	Ghir_D08G005230		Ghir_A13G006900	Ghir_A08G016250		Ghir_D02G004410
	Ghir_A05G026030	Ghir_D02G001660		Ghir_D05G037430	Ghir_D02G000070		Ghir_D01G013500	Ghir_A05G039130	Ghir_D08G005460		Ghir_A13G007100	Ghir_A08G016260		Ghir_D02G004650
	Ghir_A05G026040	Ghir_D02G001830		Ghir_D05G037480	Ghir_D02G001400		Ghir_D01G013520	Ghir_A05G039150	Ghir_D08G005960		Ghir_A13G007190	Ghir_A08G016330		Ghir_D02G005530
	Ghir_A05G026080	Ghir_D02G003380		Ghir_D05G037760	Ghir_D02G001900		Ghir_D01G013900	Ghir_A05G039220	Ghir_D08G007550		Ghir_A13G007450	Ghir_A08G017020		Ghir_D02G005570
	Ghir_A05G026320	Ghir_D02G003390		Ghir_D05G038140	Ghir_D02G002420		Ghir_D01G013930	Ghir_A05G039430	Ghir_D08G007660		Ghir_A13G007860	Ghir_A08G017130		Ghir_D02G006170
	Ghir_A05G026530	Ghir_D02G003440		Ghir_D06G000180	Ghir_D02G002570		Ghir_D01G014260	Ghir_A05G039610	Ghir_D08G007850		Ghir_A13G007980	Ghir_A08G017470		Ghir_D02G006860
	Ghir_A05G026680	Ghir_D02G003540		Ghir_D06G001770	Ghir_D02G003430		Ghir_D01G014700	Ghir_A05G039700	Ghir_D08G008840		Ghir_A13G008010	Ghir_A08G017480		Ghir_D02G007520
	Ghir_A05G026790	Ghir_D02G003770		Ghir_D06G001830	Ghir_D02G004370		Ghir_D01G015390	Ghir_A05G039890	Ghir_D08G009910		Ghir_A13G008170	Ghir_A08G017520		Ghir_D02G008060
	Ghir_A05G026810	Ghir_D02G003790		Ghir_D06G002090	Ghir_D02G004550		Ghir_D01G015820	Ghir_A05G039960	Ghir_D08G011490		Ghir_A13G009960	Ghir_A08G017570		Ghir_D02G008160
	Ghir_A05G026940	Ghir_D02G003810		Ghir_D06G002130	Ghir_D02G004850		Ghir_D01G016080	Ghir_A05G040500	Ghir_D08G012890		Ghir_A13G010600	Ghir_A08G017620		Ghir_D02G008170
	Ghir_A05G027120	Ghir_D02G004040		Ghir_D06G004160	Ghir_D02G004880		Ghir_D01G016430	Ghir_A05G040710	Ghir_D08G012920		Ghir_A13G010660	Ghir_A08G018050		Ghir_D02G008430
	Ghir_A05G027340	Ghir_D02G004380		Ghir_D06G005500	Ghir_D02G005130		Ghir_D01G016910	Ghir_A05G040790	Ghir_D08G013020		Ghir_A13G010900	Ghir_A08G018560		Ghir_D02G009320
	Ghir_A05G027350	Ghir_D02G004590		Ghir_D06G005530	Ghir_D02G005210		Ghir_D01G016990	Ghir_A05G041410	Ghir_D08G013650		Ghir_A13G011300	Ghir_A08G018690		Ghir_D02G009630
	Ghir_A05G027440	Ghir_D02G004630		Ghir_D06G005840	Ghir_D02G005680		Ghir_D01G017100	Ghir_A05G041430	Ghir_D08G013950		Ghir_A13G012040	Ghir_A08G018760		Ghir_D02G010830
	Ghir_A05G028110	Ghir_D02G004960		Ghir_D06G005930	Ghir_D02G005720		Ghir_D01G017730	Ghir_A05G041490	Ghir_D08G014370		Ghir_A13G012810	Ghir_A08G018790		Ghir_D02G011470
	Ghir_A05G028590	Ghir_D02G005400		Ghir_D06G006820	Ghir_D02G006160		Ghir_D01G017830	Ghir_A05G041680	Ghir_D08G015360		Ghir_A13G013150	Ghir_A08G019080		Ghir_D02G011880
	Ghir_A05G028700	Ghir_D02G006010		Ghir_D06G007730	Ghir_D02G006330		Ghir_D01G017980	Ghir_A05G041720	Ghir_D08G015460		Ghir_A13G013300	Ghir_A08G019290		Ghir_D02G012090
	Ghir_A05G028720	Ghir_D02G006800		Ghir_D06G008010	Ghir_D02G006780		Ghir_D01G018270	Ghir_A05G041850	Ghir_D08G015800		Ghir_A13G013490	Ghir_A08G019470		Ghir_D02G012120
	Ghir_A05G028730	Ghir_D02G007460		Ghir_D06G008630	Ghir_D02G007350		Ghir_D01G018710	Ghir_A05G041910	Ghir_D08G015870		Ghir_A13G013520	Ghir_A08G019490		Ghir_D02G012370
	Ghir_A05G028870	Ghir_D02G007780		Ghir_D06G008950	Ghir_D02G007950		Ghir_D01G019050	Ghir_A05G042210	Ghir_D08G016970		Ghir_A13G013620	Ghir_A08G019630		Ghir_D02G013620
	Ghir_A05G029080	Ghir_D02G008160		Ghir_D06G009480	Ghir_D02G008070		Ghir_D01G019950	Ghir_A05G042230	Ghir_D08G017050		Ghir_A13G013840	Ghir_A08G019720		Ghir_D02G013690
	Ghir_A05G029090	Ghir_D02G009060		Ghir_D06G009570	Ghir_D02G008250		Ghir_D01G020180	Ghir_A05G042320	Ghir_D08G017120		Ghir_A13G014420	Ghir_A08G019780		Ghir_D02G013860
	Ghir_A05G029100	Ghir_D02G009320		Ghir_D06G009670	Ghir_D02G008610		Ghir_D01G020380	Ghir_A05G042530	Ghir_D08G017300		Ghir_A13G015750	Ghir_A08G020630		Ghir_D02G014310
	Ghir_A05G029180	Ghir_D02G009490		Ghir_D06G010240	Ghir_D02G008650		Ghir_D01G020460	Ghir_A05G042600	Ghir_D08G017400		Ghir_A13G016030	Ghir_A08G021430		Ghir_D02G014830
	Ghir_A05G029270	Ghir_D02G009630		Ghir_D06G010280	Ghir_D02G009040		Ghir_D01G020800	Ghir_A05G042980	Ghir_D08G017550		Ghir_A13G017010	Ghir_A08G021550		Ghir_D02G014950
	Ghir_A05G029350	Ghir_D02G009830		Ghir_D06G010460	Ghir_D02G009220		Ghir_D01G020880	Ghir_A05G043350	Ghir_D08G018020		Ghir_A13G017050	Ghir_A08G021610		Ghir_D02G015800
	Ghir_A05G029410	Ghir_D02G009860		Ghir_D06G010760	Ghir_D02G009870		Ghir_D01G021440	Ghir_A05G043370	Ghir_D08G018270		Ghir_A13G017560	Ghir_A08G021830		Ghir_D02G015810
	Ghir_A05G029650	Ghir_D02G010520		Ghir_D06G011120	Ghir_D02G009890		Ghir_D01G021670	Ghir_A05G043400	Ghir_D08G019590		Ghir_A13G017710	Ghir_A08G022270		Ghir_D02G016030
	Ghir_A05G030190	Ghir_D02G010910		Ghir_D06G011650	Ghir_D02G010290		Ghir_D01G022320	Ghir_A05G043500	Ghir_D08G019800		Ghir_A13G017750	Ghir_A08G022660		Ghir_D02G016310
	Ghir_A05G030240	Ghir_D02G011880		Ghir_D06G011890	Ghir_D02G010450		Ghir_D01G022360	Ghir_A06G000550	Ghir_D08G019850		Ghir_A13G018260	Ghir_A08G023140		Ghir_D02G016790
	Ghir_A05G030300	Ghir_D02G012110		Ghir_D06G011980	Ghir_D02G010880		Ghir_D01G022370	Ghir_A06G000580	Ghir_D08G019960		Ghir_A13G018570	Ghir_A08G023180		Ghir_D02G017370
	Ghir_A05G030860	Ghir_D02G012190		Ghir_D06G012390	Ghir_D02G011330		Ghir_D01G022440	Ghir_A06G000630	Ghir_D08G020100		Ghir_A13G018590	Ghir_A08G023390		Ghir_D02G017570
	Ghir_A05G030980	Ghir_D02G012330		Ghir_D06G012700	Ghir_D02G012080		Ghir_D01G022860	Ghir_A06G000650	Ghir_D08G020590		Ghir_A13G018770	Ghir_A08G023410		Ghir_D02G017580
	Ghir_A05G031260	Ghir_D02G013100		Ghir_D06G012720	Ghir_D02G012220		Ghir_D01G023690	Ghir_A06G000800	Ghir_D08G020990		Ghir_A13G018960	Ghir_A08G024030		Ghir_D02G018110
	Ghir_A05G031490	Ghir_D02G013370		Ghir_D06G012960	Ghir_D02G012820		Ghir_D01G023800	Ghir_A06G001010	Ghir_D08G021280		Ghir_A13G019130	Ghir_A08G024270		Ghir_D02G018760
	Ghir_A05G031570	Ghir_D02G013640		Ghir_D06G013260	Ghir_D02G013350		Ghir_D01G023960	Ghir_A06G001070	Ghir_D08G021510		Ghir_A13G019200	Ghir_A08G024430		Ghir_D02G020130
	Ghir_A05G031920	Ghir_D02G014010		Ghir_D06G013290	Ghir_D02G013650		Ghir_D01G023980	Ghir_A06G001110	Ghir_D08G021520		Ghir_A13G019480	Ghir_A08G024520		Ghir_D02G020140
	Ghir_A05G032100	Ghir_D02G014120		Ghir_D06G014220	Ghir_D02G014520		Ghir_D01G024060	Ghir_A06G001190	Ghir_D08G021650		Ghir_A13G019710	Ghir_A08G024880		Ghir_D02G020190
	Ghir_A05G032180	Ghir_D02G014790		Ghir_D06G014530	Ghir_D02G014600		Ghir_D02G000680	Ghir_A06G001380	Ghir_D08G021860		Ghir_A13G019730	Ghir_A08G025050		Ghir_D02G020740
	Ghir_A05G032360	Ghir_D02G014830		Ghir_D06G014790	Ghir_D02G014620		Ghir_D02G001390	Ghir_A06G001430	Ghir_D08G022030		Ghir_A13G020270	Ghir_A08G025640		Ghir_D02G021330
	Ghir_A05G032590	Ghir_D02G016030		Ghir_D06G016770	Ghir_D02G014700		Ghir_D02G002540	Ghir_A06G001720	Ghir_D08G022400		Ghir_A13G020660	Ghir_A08G025880		Ghir_D02G021360
	Ghir_A05G032640	Ghir_D02G016860		Ghir_D06G016940	Ghir_D02G016730		Ghir_D02G002640	Ghir_A06G001820	Ghir_D08G022490		Ghir_A13G020910	Ghir_A08G026020		Ghir_D02G021480
	Ghir_A05G032810	Ghir_D02G018120		Ghir_D06G018750	Ghir_D02G017310		Ghir_D02G003370	Ghir_A06G002060	Ghir_D08G026200		Ghir_A13G021260	Ghir_A08G026090		Ghir_D02G021670
	Ghir_A05G032860	Ghir_D02G018300		Ghir_D06G018850	Ghir_D02G017450		Ghir_D02G003410	Ghir_A06G002160	Ghir_D08G026520		Ghir_A13G021600	Ghir_A08G026590		Ghir_D02G022310
	Ghir_A05G032910	Ghir_D02G019400		Ghir_D06G019150	Ghir_D02G017540		Ghir_D02G003620	Ghir_A06G002190	Ghir_D08G026970		Ghir_A13G021850	Ghir_A09G000200		Ghir_D02G022450
	Ghir_A05G032920	Ghir_D02G019410		Ghir_D06G019700	Ghir_D02G018010		Ghir_D02G003730	Ghir_A06G002210	Ghir_D08G028020		Ghir_A13G022060	Ghir_A09G000420		Ghir_D02G022730
	Ghir_A05G033150	Ghir_D02G020600		Ghir_D06G020790	Ghir_D02G018080		Ghir_D02G003760	Ghir_A06G002440	Ghir_D09G001040		Ghir_A13G022190	Ghir_A09G000540		Ghir_D02G022880
	Ghir_A05G033520	Ghir_D02G021350		Ghir_D06G021060	Ghir_D02G018390		Ghir_D02G004450	Ghir_A06G002450	Ghir_D09G001870		Ghir_A13G022300	Ghir_A09G000810		Ghir_D02G023290
	Ghir_A05G033570	Ghir_D02G021420		Ghir_D06G021260	Ghir_D02G018560		Ghir_D02G004650	Ghir_A06G002530	Ghir_D09G002060		Ghir_A13G022970	Ghir_A09G000920		Ghir_D02G023700
	Ghir_A05G033590	Ghir_D02G021920		Ghir_D06G021390	Ghir_D02G020680		Ghir_D02G005570	Ghir_A06G002710	Ghir_D09G002160		Ghir_A13G023330	Ghir_A09G001130		Ghir_D02G023780
	Ghir_A05G033670	Ghir_D02G021970		Ghir_D06G021590	Ghir_D02G020770		Ghir_D02G005860	Ghir_A06G002730	Ghir_D09G002310		Ghir_A13G023560	Ghir_A09G001250		Ghir_D02G023990
	Ghir_A05G033680	Ghir_D02G022050		Ghir_D06G021860	Ghir_D02G021380		Ghir_D02G006170	Ghir_A06G002840	Ghir_D09G003400		Ghir_A13G023810	Ghir_A09G001670		Ghir_D02G024760
	Ghir_A05G033900	Ghir_D02G022310		Ghir_D06G021990	Ghir_D02G021590		Ghir_D02G007520	Ghir_A06G002960	Ghir_D09G003730		Ghir_A13G023960	Ghir_A09G002320		Ghir_D02G024990
	Ghir_A05G034120	Ghir_D02G023120		Ghir_D06G022150	Ghir_D02G022000		Ghir_D02G008100	Ghir_A06G003260	Ghir_D09G003780		Ghir_A13G024100	Ghir_A09G002350		Ghir_D03G000160
	Ghir_A05G034260	Ghir_D02G023520		Ghir_D06G023620	Ghir_D02G023090		Ghir_D02G008110	Ghir_A06G003320	Ghir_D09G004790		Ghir_A13G024190	Ghir_A09G002570		Ghir_D03G001060
	Ghir_A05G034280	Ghir_D02G023710		Ghir_D06G023640	Ghir_D02G023860		Ghir_D02G008430	Ghir_A06G003340	Ghir_D09G005910		Ghir_A13G024690	Ghir_A09G002640		Ghir_D03G001230
	Ghir_A05G034730	Ghir_D02G023980		Ghir_D07G000070	Ghir_D02G024370		Ghir_D02G009750	Ghir_A06G003360	Ghir_D09G006410		Ghir_D01G000080	Ghir_A09G002860		Ghir_D03G002600
	Ghir_A05G035050	Ghir_D02G023990		Ghir_D07G000320	Ghir_D03G000720		Ghir_D02G010150	Ghir_A06G003390	Ghir_D09G007500		Ghir_D01G000310	Ghir_A09G003070		Ghir_D03G002780
	Ghir_A05G035290	Ghir_D02G024500		Ghir_D07G000580	Ghir_D03G000920		Ghir_D02G010340	Ghir_A06G003410	Ghir_D09G008960		Ghir_D01G000370	Ghir_A09G003240		Ghir_D03G002830
	Ghir_A05G035380	Ghir_D02G024850		Ghir_D07G001010	Ghir_D03G001030		Ghir_D02G010410	Ghir_A06G003740	Ghir_D09G009380		Ghir_D01G000440	Ghir_A09G003580		Ghir_D03G002880
	Ghir_A05G035570	Ghir_D02G024900		Ghir_D07G002230	Ghir_D03G001140		Ghir_D02G010660	Ghir_A06G003810	Ghir_D09G010900		Ghir_D01G000630	Ghir_A09G004820		Ghir_D03G003610
	Ghir_A05G035710	Ghir_D02G024970		Ghir_D07G002720	Ghir_D03G001310		Ghir_D02G011190	Ghir_A06G003820	Ghir_D09G010940		Ghir_D01G000780	Ghir_A09G005280		Ghir_D03G004380
	Ghir_A05G035950	Ghir_D02G024990		Ghir_D07G003440	Ghir_D03G001400		Ghir_D02G011470	Ghir_A06G003980	Ghir_D09G011380		Ghir_D01G001190	Ghir_A09G005340		Ghir_D03G005440
	Ghir_A05G036050	Ghir_D03G000570		Ghir_D07G003610	Ghir_D03G001410		Ghir_D02G011890	Ghir_A06G004150	Ghir_D09G012220		Ghir_D01G001390	Ghir_A09G005920		Ghir_D03G005930
	Ghir_A05G036420	Ghir_D03G001060		Ghir_D07G006250	Ghir_D03G002370		Ghir_D02G012410	Ghir_A06G004230	Ghir_D09G012490		Ghir_D01G001410	Ghir_A09G005980		Ghir_D03G006930
	Ghir_A05G036500	Ghir_D03G001230		Ghir_D07G006390	Ghir_D03G002580		Ghir_D02G012900	Ghir_A06G004260	Ghir_D09G012850		Ghir_D01G001660	Ghir_A09G006170		Ghir_D03G007180
	Ghir_A05G036510	Ghir_D03G002410		Ghir_D07G006670	Ghir_D03G003360		Ghir_D02G013620	Ghir_A06G004380	Ghir_D09G014060		Ghir_D01G001690	Ghir_A09G006330		Ghir_D03G008260
	Ghir_A05G036520	Ghir_D03G002800		Ghir_D07G007550	Ghir_D03G003580		Ghir_D02G013690	Ghir_A06G004540	Ghir_D09G014930		Ghir_D01G001970	Ghir_A09G007040		Ghir_D03G008330
	Ghir_A05G036570	Ghir_D03G003010		Ghir_D07G007780	Ghir_D03G003710		Ghir_D02G014240	Ghir_A06G004560	Ghir_D09G014950		Ghir_D01G002020	Ghir_A09G007590		Ghir_D03G008350
	Ghir_A05G036620	Ghir_D03G004290		Ghir_D07G009040	Ghir_D03G003860		Ghir_D02G014310	Ghir_A06G004580	Ghir_D09G015490		Ghir_D01G002350	Ghir_A09G007780		Ghir_D03G008360
	Ghir_A05G036700	Ghir_D03G005330		Ghir_D07G009450	Ghir_D03G004620		Ghir_D02G014710	Ghir_A06G004640	Ghir_D09G015670		Ghir_D01G002410	Ghir_A09G008230		Ghir_D03G008380
	Ghir_A05G036750	Ghir_D03G005760		Ghir_D07G009720	Ghir_D03G005450		Ghir_D02G014950	Ghir_A06G004760	Ghir_D09G016050		Ghir_D01G002920	Ghir_A09G008270		Ghir_D03G008880
	Ghir_A05G036840	Ghir_D03G006220		Ghir_D07G010120	Ghir_D03G005540		Ghir_D02G015450	Ghir_A06G004940	Ghir_D09G016170		Ghir_D01G003020	Ghir_A09G008440		Ghir_D03G008970
	Ghir_A05G036870	Ghir_D03G006370		Ghir_D07G010620	Ghir_D03G006130		Ghir_D02G015800	Ghir_A06G004960	Ghir_D09G016430		Ghir_D01G003750	Ghir_A09G008490		Ghir_D03G009430
	Ghir_A05G036880	Ghir_D03G006470		Ghir_D07G011890	Ghir_D03G006610		Ghir_D02G015810	Ghir_A06G004980	Ghir_D09G017270		Ghir_D01G004520	Ghir_A09G009040		Ghir_D03G009910
	Ghir_A05G036910	Ghir_D03G006590		Ghir_D07G012880	Ghir_D03G007090		Ghir_D02G016790	Ghir_A06G005170	Ghir_D09G017610		Ghir_D01G004710	Ghir_A09G009110		Ghir_D03G010400
	Ghir_A05G036930	Ghir_D03G007070		Ghir_D07G013120	Ghir_D03G007440		Ghir_D02G017570	Ghir_A06G005220	Ghir_D09G017670		Ghir_D01G004820	Ghir_A09G009270		Ghir_D03G010430
	Ghir_A05G037160	Ghir_D03G007530		Ghir_D07G013490	Ghir_D03G007780		Ghir_D02G017590	Ghir_A06G005240	Ghir_D09G018160		Ghir_D01G005040	Ghir_A09G009310		Ghir_D03G010450
	Ghir_A05G037260	Ghir_D03G007590		Ghir_D07G013590	Ghir_D03G008660		Ghir_D02G017710	Ghir_A06G005250	Ghir_D09G018220		Ghir_D01G006890	Ghir_A09G009320		Ghir_D03G010860
	Ghir_A05G037420	Ghir_D03G008300		Ghir_D07G014340	Ghir_D03G009480		Ghir_D02G018110	Ghir_A06G005590	Ghir_D09G018590		Ghir_D01G007320	Ghir_A09G009380		Ghir_D03G011290
	Ghir_A05G037560	Ghir_D03G008620		Ghir_D07G016210	Ghir_D03G009590		Ghir_D02G018450	Ghir_A06G005600	Ghir_D09G019040		Ghir_D01G007700	Ghir_A09G009440		Ghir_D03G011320
	Ghir_A05G037730	Ghir_D03G008710		Ghir_D07G017220	Ghir_D03G010110		Ghir_D02G018760	Ghir_A06G005900	Ghir_D09G019640		Ghir_D01G007800	Ghir_A09G009750		Ghir_D03G011740
	Ghir_A05G037870	Ghir_D03G009330		Ghir_D07G017860	Ghir_D03G010200		Ghir_D02G018860	Ghir_A06G005910	Ghir_D09G019860		Ghir_D01G007980	Ghir_A09G009970		Ghir_D03G011790
	Ghir_A05G038050	Ghir_D03G009670		Ghir_D07G017980	Ghir_D03G010580		Ghir_D02G018940	Ghir_A06G006300	Ghir_D09G020780		Ghir_D01G008550	Ghir_A09G010100		Ghir_D03G012240
	Ghir_A05G038330	Ghir_D03G009890		Ghir_D07G018380	Ghir_D03G011260		Ghir_D02G019360	Ghir_A06G006850	Ghir_D09G021170		Ghir_D01G009520	Ghir_A09G010490		Ghir_D03G012500
	Ghir_A05G038540	Ghir_D03G009930		Ghir_D07G018910	Ghir_D03G012070		Ghir_D02G019570	Ghir_A06G007030	Ghir_D09G021890		Ghir_D01G009590	Ghir_A09G010500		Ghir_D03G012810
	Ghir_A05G038580	Ghir_D03G010450		Ghir_D07G020390	Ghir_D03G012590		Ghir_D02G019800	Ghir_A06G007350	Ghir_D09G022220		Ghir_D01G009790	Ghir_A09G010540		Ghir_D03G012880
	Ghir_A05G038830	Ghir_D03G011310		Ghir_D07G021780	Ghir_D03G012760		Ghir_D02G019990	Ghir_A06G007500	Ghir_D09G022600		Ghir_D01G009810	Ghir_A09G011150		Ghir_D03G014020
	Ghir_A05G038870	Ghir_D03G011740		Ghir_D07G021860	Ghir_D03G012820		Ghir_D02G020130	Ghir_A06G007680	Ghir_D09G022880		Ghir_D01G010260	Ghir_A09G011220		Ghir_D03G014030
	Ghir_A05G039040	Ghir_D03G011790		Ghir_D07G022030	Ghir_D03G012940		Ghir_D02G020190	Ghir_A06G007700	Ghir_D09G022920		Ghir_D01G010330	Ghir_A09G011710		Ghir_D03G014060
	Ghir_A05G039070	Ghir_D03G011900		Ghir_D07G022610	Ghir_D03G013230		Ghir_D02G021330	Ghir_A06G007890	Ghir_D09G023920		Ghir_D01G011220	Ghir_A09G011760		Ghir_D03G014630
	Ghir_A05G039150	Ghir_D03G012090		Ghir_D07G022680	Ghir_D03G013380		Ghir_D02G021360	Ghir_A06G007920	Ghir_D09G023950		Ghir_D01G011430	Ghir_A09G011960		Ghir_D03G014790
	Ghir_A05G039430	Ghir_D03G012430		Ghir_D07G023280	Ghir_D03G014100		Ghir_D02G021570	Ghir_A06G007990	Ghir_D09G024340		Ghir_D01G011590	Ghir_A09G012080		Ghir_D03G015360
	Ghir_A05G039550	Ghir_D03G013080		Ghir_D07G023790	Ghir_D03G014850		Ghir_D02G021670	Ghir_A06G008030	Ghir_D09G024910		Ghir_D01G012630	Ghir_A09G012170		Ghir_D03G015620
	Ghir_A05G039610	Ghir_D03G013090		Ghir_D07G024360	Ghir_D03G014930		Ghir_D02G022010	Ghir_A06G008110	Ghir_D10G000310		Ghir_D01G012970	Ghir_A09G012510		Ghir_D03G016140
	Ghir_A05G039650	Ghir_D03G013260		Ghir_D07G024400	Ghir_D03G015430		Ghir_D02G022120	Ghir_A06G008290	Ghir_D10G000580		Ghir_D01G013220	Ghir_A09G012520		Ghir_D03G016220
	Ghir_A05G039700	Ghir_D03G013300		Ghir_D07G024570	Ghir_D03G015840		Ghir_D02G022450	Ghir_A06G008300	Ghir_D10G001280		Ghir_D01G013660	Ghir_A09G012790		Ghir_D03G016430
	Ghir_A05G039890	Ghir_D03G013410		Ghir_D07G025040	Ghir_D03G016040		Ghir_D02G022590	Ghir_A06G008500	Ghir_D10G001340		Ghir_D01G013900	Ghir_A09G013340		Ghir_D03G016640
	Ghir_A05G039960	Ghir_D03G013620		Ghir_D08G000520	Ghir_D03G016570		Ghir_D02G022700	Ghir_A06G008570	Ghir_D10G001360		Ghir_D01G014260	Ghir_A09G013410		Ghir_D03G016770
	Ghir_A05G040790	Ghir_D03G014020		Ghir_D08G000950	Ghir_D03G017200		Ghir_D02G022730	Ghir_A06G008640	Ghir_D10G001650		Ghir_D01G014510	Ghir_A09G013610		Ghir_D03G018290
	Ghir_A05G041010	Ghir_D03G014710		Ghir_D08G001230	Ghir_D03G018080		Ghir_D02G022880	Ghir_A06G008680	Ghir_D10G003240		Ghir_D01G014560	Ghir_A09G013960		Ghir_D03G018340
	Ghir_A05G041160	Ghir_D03G015450		Ghir_D08G001550	Ghir_D03G018350		Ghir_D02G023260	Ghir_A06G008800	Ghir_D10G003380		Ghir_D01G014880	Ghir_A09G014050		Ghir_D03G018920
	Ghir_A05G041220	Ghir_D03G015620		Ghir_D08G002670	Ghir_D03G018550		Ghir_D02G023290	Ghir_A06G008920	Ghir_D10G004060		Ghir_D01G015210	Ghir_A09G014130		Ghir_D03G019160
	Ghir_A05G041230	Ghir_D03G015710		Ghir_D08G005180	Ghir_D03G018980		Ghir_D02G023560	Ghir_A06G009010	Ghir_D10G005180		Ghir_D01G015280	Ghir_A09G014670		Ghir_D03G019170
	Ghir_A05G041360	Ghir_D03G016590		Ghir_D08G005410	Ghir_D03G019020		Ghir_D02G023700	Ghir_A06G009220	Ghir_D10G005840		Ghir_D01G015380	Ghir_A09G014930		Ghir_D04G000020
	Ghir_A05G041410	Ghir_D03G016640		Ghir_D08G005900	Ghir_D03G019240		Ghir_D02G024760	Ghir_A06G009370	Ghir_D10G005910		Ghir_D01G015480	Ghir_A09G015060		Ghir_D04G000150
	Ghir_A05G041490	Ghir_D03G017540		Ghir_D08G005950	Ghir_D04G001090		Ghir_D03G000420	Ghir_A06G009450	Ghir_D10G007130		Ghir_D01G015700	Ghir_A09G015080		Ghir_D04G000360
	Ghir_A05G041540	Ghir_D03G017680		Ghir_D08G008010	Ghir_D04G001650		Ghir_D03G001130	Ghir_A06G009540	Ghir_D10G008560		Ghir_D01G016080	Ghir_A09G015180		Ghir_D04G001010
	Ghir_A05G041680	Ghir_D03G018020		Ghir_D08G008940	Ghir_D04G001740		Ghir_D03G001300	Ghir_A06G009620	Ghir_D10G009510		Ghir_D01G016910	Ghir_A09G015330		Ghir_D04G001930
	Ghir_A05G041850	Ghir_D03G018830		Ghir_D08G010120	Ghir_D04G001810		Ghir_D03G001500	Ghir_A06G009990	Ghir_D10G009550		Ghir_D01G016990	Ghir_A09G015540		Ghir_D04G002860
	Ghir_A05G041880	Ghir_D04G001880		Ghir_D08G011420	Ghir_D04G002010		Ghir_D03G002490	Ghir_A06G010050	Ghir_D10G011050		Ghir_D01G017060	Ghir_A09G015780		Ghir_D04G003260
	Ghir_A05G042110	Ghir_D04G001930		Ghir_D08G012290	Ghir_D04G004280		Ghir_D03G002510	Ghir_A06G010140	Ghir_D10G011180		Ghir_D01G017730	Ghir_A09G015920		Ghir_D04G003320
	Ghir_A05G042220	Ghir_D04G002020		Ghir_D08G013340	Ghir_D04G004300		Ghir_D03G002780	Ghir_A06G010190	Ghir_D10G011380		Ghir_D01G017740	Ghir_A09G016020		Ghir_D04G003400
	Ghir_A05G042230	Ghir_D04G002420		Ghir_D08G014650	Ghir_D04G004410		Ghir_D03G002880	Ghir_A06G010240	Ghir_D10G012020		Ghir_D01G018310	Ghir_A09G016070		Ghir_D04G003440
	Ghir_A05G042420	Ghir_D04G003030		Ghir_D08G015550	Ghir_D04G004670		Ghir_D03G002950	Ghir_A06G010250	Ghir_D10G012480		Ghir_D01G018660	Ghir_A09G016110		Ghir_D04G004110
	Ghir_A05G042500	Ghir_D04G003070		Ghir_D08G017510	Ghir_D04G005600		Ghir_D03G003230	Ghir_A06G010370	Ghir_D10G012860		Ghir_D01G018780	Ghir_A09G016410		Ghir_D04G004120
	Ghir_A05G042530	Ghir_D04G003640		Ghir_D08G018010	Ghir_D04G005870		Ghir_D03G003540	Ghir_A06G010500	Ghir_D10G016280		Ghir_D01G019150	Ghir_A09G016450		Ghir_D04G004220
	Ghir_A05G042600	Ghir_D04G003770		Ghir_D08G021550	Ghir_D04G005890		Ghir_D03G003610	Ghir_A06G010530	Ghir_D10G016730		Ghir_D01G019360	Ghir_A09G016520		Ghir_D04G004310
	Ghir_A05G042690	Ghir_D04G004030		Ghir_D08G021940	Ghir_D04G006700		Ghir_D03G004360	Ghir_A06G010550	Ghir_D10G016830		Ghir_D01G019850	Ghir_A09G016560		Ghir_D04G004380
	Ghir_A05G042730	Ghir_D04G005990		Ghir_D08G022180	Ghir_D04G006900		Ghir_D03G004380	Ghir_A06G010730	Ghir_D10G017530		Ghir_D01G019960	Ghir_A09G016880		Ghir_D04G004960
	Ghir_A05G042920	Ghir_D04G007050		Ghir_D08G022850	Ghir_D04G007060		Ghir_D03G005290	Ghir_A06G010830	Ghir_D10G017870		Ghir_D01G020530	Ghir_A09G016910		Ghir_D04G005880
	Ghir_A05G043000	Ghir_D04G007190		Ghir_D08G022990	Ghir_D04G007230		Ghir_D03G005440	Ghir_A06G010850	Ghir_D10G018990		Ghir_D01G020580	Ghir_A09G017330		Ghir_D04G006100
	Ghir_A05G043350	Ghir_D04G007300		Ghir_D08G023630	Ghir_D04G007540		Ghir_D03G005680	Ghir_A06G010900	Ghir_D10G019280		Ghir_D01G020670	Ghir_A09G017350		Ghir_D04G006930
	Ghir_A05G043400	Ghir_D04G007390		Ghir_D08G024410	Ghir_D04G007590		Ghir_D03G005790	Ghir_A06G010910	Ghir_D10G020410		Ghir_D01G020800	Ghir_A09G017900		Ghir_D04G007050
	Ghir_A05G043500	Ghir_D04G008110		Ghir_D08G024720	Ghir_D04G009350		Ghir_D03G005910	Ghir_A06G010980	Ghir_D10G020570		Ghir_D01G020880	Ghir_A09G018120		Ghir_D04G007400
	Ghir_A06G000250	Ghir_D04G008460		Ghir_D08G025100	Ghir_D04G010340		Ghir_D03G005930	Ghir_A06G011050	Ghir_D10G021940		Ghir_D01G021790	Ghir_A09G018310		Ghir_D04G007840
	Ghir_A06G000340	Ghir_D04G008580		Ghir_D08G025470	Ghir_D04G010780		Ghir_D03G006910	Ghir_A06G011250	Ghir_D10G023570		Ghir_D01G022320	Ghir_A09G018390		Ghir_D04G008120
	Ghir_A06G000550	Ghir_D04G008950		Ghir_D08G026300	Ghir_D04G011300		Ghir_D03G006930	Ghir_A06G011330	Ghir_D10G024170		Ghir_D01G022440	Ghir_A09G018460		Ghir_D04G009060
	Ghir_A06G000580	Ghir_D04G008980		Ghir_D08G026530	Ghir_D04G011460		Ghir_D03G007180	Ghir_A06G011640	Ghir_D10G024470		Ghir_D02G000150	Ghir_A09G018800		Ghir_D04G009900
	Ghir_A06G000630	Ghir_D04G010990		Ghir_D08G027080	Ghir_D04G012640		Ghir_D03G008330	Ghir_A06G012000	Ghir_D10G025040		Ghir_D02G001040	Ghir_A09G018830		Ghir_D04G010050
	Ghir_A06G000800	Ghir_D04G011620		Ghir_D08G027960	Ghir_D04G013020		Ghir_D03G008360	Ghir_A06G012010	Ghir_D11G000890		Ghir_D02G001320	Ghir_A09G019040		Ghir_D04G010640
	Ghir_A06G001000	Ghir_D04G011650		Ghir_D09G001010	Ghir_D04G013060		Ghir_D03G008530	Ghir_A06G012150	Ghir_D11G001320		Ghir_D02G001480	Ghir_A09G019190		Ghir_D04G010940
	Ghir_A06G001070	Ghir_D04G011860		Ghir_D09G002220	Ghir_D04G013160		Ghir_D03G008970	Ghir_A06G012180	Ghir_D11G001650		Ghir_D02G001660	Ghir_A09G019830		Ghir_D04G011610
	Ghir_A06G001110	Ghir_D04G011980		Ghir_D09G002290	Ghir_D04G013240		Ghir_D03G009430	Ghir_A06G012340	Ghir_D11G002180		Ghir_D02G001830	Ghir_A09G019970		Ghir_D04G012000
	Ghir_A06G001190	Ghir_D04G012300		Ghir_D09G003420	Ghir_D04G013280		Ghir_D03G009910	Ghir_A06G012490	Ghir_D11G003160		Ghir_D02G002940	Ghir_A09G020060		Ghir_D04G012990
	Ghir_A06G001200	Ghir_D04G012330		Ghir_D09G003600	Ghir_D04G013400		Ghir_D03G010430	Ghir_A06G012690	Ghir_D11G003320		Ghir_D02G003280	Ghir_A09G020060		Ghir_D04G013470
	Ghir_A06G001380	Ghir_D04G012910		Ghir_D09G003730	Ghir_D04G013730		Ghir_D03G010470	Ghir_A06G013070	Ghir_D11G003360		Ghir_D02G003410	Ghir_A09G020060		Ghir_D04G013760
	Ghir_A06G001430	Ghir_D04G013200		Ghir_D09G004460	Ghir_D04G014240		Ghir_D03G010860	Ghir_A06G013330	Ghir_D11G004050		Ghir_D02G003480	Ghir_A09G020060		Ghir_D04G013790
	Ghir_A06G001460	Ghir_D04G013760		Ghir_D09G004480	Ghir_D04G015090		Ghir_D03G011290	Ghir_A06G013490	Ghir_D11G004650		Ghir_D02G003620	Ghir_A09G020060		Ghir_D04G014520
	Ghir_A06G001720	Ghir_D04G014670		Ghir_D09G005610	Ghir_D04G015400		Ghir_D03G012240	Ghir_A06G013740	Ghir_D11G005220		Ghir_D02G003760	Ghir_A09G020100		Ghir_D04G014790
	Ghir_A06G001760	Ghir_D04G015080		Ghir_D09G005640	Ghir_D04G016050		Ghir_D03G012500	Ghir_A06G013750	Ghir_D11G005340		Ghir_D02G004380	Ghir_A09G020920		Ghir_D04G015430
	Ghir_A06G001810	Ghir_D04G016040		Ghir_D09G005910	Ghir_D04G017430		Ghir_D03G012810	Ghir_A06G013770	Ghir_D11G005460		Ghir_D02G005400	Ghir_A09G021000		Ghir_D04G015500
	Ghir_A06G001820	Ghir_D04G017100		Ghir_D09G006430	Ghir_D04G017950		Ghir_D03G012880	Ghir_A06G014010	Ghir_D11G006140		Ghir_D02G006340	Ghir_A09G021340		Ghir_D04G016360
	Ghir_A06G002160	Ghir_D04G017200		Ghir_D09G007370	Ghir_D04G019040		Ghir_D03G013160	Ghir_A06G014190	Ghir_D11G006210		Ghir_D02G006800	Ghir_A09G021530		Ghir_D04G016710
	Ghir_A06G002190	Ghir_D04G017760		Ghir_D09G007930	Ghir_D04G019270		Ghir_D03G013390	Ghir_A06G014240	Ghir_D11G008010		Ghir_D02G006990	Ghir_A09G021840		Ghir_D04G016930
	Ghir_A06G002210	Ghir_D04G017820		Ghir_D09G008480	Ghir_D04G019690		Ghir_D03G013670	Ghir_A06G014400	Ghir_D11G008090		Ghir_D02G007460	Ghir_A09G021850		Ghir_D04G016970
	Ghir_A06G002440	Ghir_D04G019030		Ghir_D09G008520	Ghir_D04G020490		Ghir_D03G014030	Ghir_A06G014470	Ghir_D11G008630		Ghir_D02G008110	Ghir_A09G022410		Ghir_D04G017100
	Ghir_A06G002530	Ghir_D04G019320		Ghir_D09G008610	Ghir_D04G020510		Ghir_D03G014170	Ghir_A06G014650	Ghir_D11G009430		Ghir_D02G008780	Ghir_A09G022450		Ghir_D04G017110
	Ghir_A06G002540	Ghir_D04G019670		Ghir_D09G008820	Ghir_D04G020940		Ghir_D03G014630	Ghir_A06G014660	Ghir_D11G011170		Ghir_D02G008830	Ghir_A09G022610		Ghir_D04G017160
	Ghir_A06G002730	Ghir_D04G019790		Ghir_D09G009500	Ghir_D05G000530		Ghir_D03G014640	Ghir_A06G015710	Ghir_D11G011260		Ghir_D02G009060	Ghir_A09G022700		Ghir_D04G017310
	Ghir_A06G002840	Ghir_D04G019930		Ghir_D09G010760	Ghir_D05G000650		Ghir_D03G014660	Ghir_A06G015840	Ghir_D11G011270		Ghir_D02G009750	Ghir_A09G022960		Ghir_D04G017440
	Ghir_A06G003210	Ghir_D05G000030		Ghir_D09G011560	Ghir_D05G000680		Ghir_D03G015270	Ghir_A06G015850	Ghir_D11G012270		Ghir_D02G009860	Ghir_A09G023430		Ghir_D04G017910
	Ghir_A06G003260	Ghir_D05G000220		Ghir_D09G013780	Ghir_D05G000710		Ghir_D03G015460	Ghir_A06G015950	Ghir_D11G013250		Ghir_D02G010150	Ghir_A09G023690		Ghir_D04G018270
	Ghir_A06G003320	Ghir_D05G000740		Ghir_D09G014060	Ghir_D05G001010		Ghir_D03G016220	Ghir_A06G016240	Ghir_D11G015290		Ghir_D02G010180	Ghir_A09G024010		Ghir_D04G019030
	Ghir_A06G003340	Ghir_D05G000870		Ghir_D09G014380	Ghir_D05G001330		Ghir_D03G016430	Ghir_A06G016270	Ghir_D11G015520		Ghir_D02G010340	Ghir_A09G024520		Ghir_D04G019140
	Ghir_A06G003360	Ghir_D05G000880		Ghir_D09G014400	Ghir_D05G001370		Ghir_D03G016770	Ghir_A06G016310	Ghir_D11G016490		Ghir_D02G010660	Ghir_A09G024590		Ghir_D04G019250
	Ghir_A06G003390	Ghir_D05G001460		Ghir_D09G015200	Ghir_D05G001410		Ghir_D03G017400	Ghir_A06G016420	Ghir_D11G017670		Ghir_D02G010740	Ghir_A09G024880		Ghir_D04G019520
	Ghir_A06G003410	Ghir_D05G001500		Ghir_D09G015230	Ghir_D05G001790		Ghir_D03G018130	Ghir_A06G016490	Ghir_D11G017890		Ghir_D02G010870	Ghir_A09G024920		Ghir_D04G019590
	Ghir_A06G003550	Ghir_D05G001780		Ghir_D09G015390	Ghir_D05G002420		Ghir_D03G018290	Ghir_A06G016510	Ghir_D11G018230		Ghir_D02G011020	Ghir_A09G025370		Ghir_D04G019790
	Ghir_A06G003740	Ghir_D05G001980		Ghir_D09G016280	Ghir_D05G003080		Ghir_D03G018340	Ghir_A06G016630	Ghir_D11G018300		Ghir_D02G011190	Ghir_A09G025670		Ghir_D04G019830
	Ghir_A06G003810	Ghir_D05G003010		Ghir_D09G016320	Ghir_D05G003620		Ghir_D03G018570	Ghir_A06G016760	Ghir_D11G019750		Ghir_D02G011450	Ghir_A09G025850		Ghir_D04G020200
	Ghir_A06G003820	Ghir_D05G003560		Ghir_D09G016830	Ghir_D05G003670		Ghir_D03G018660	Ghir_A06G016910	Ghir_D11G020400		Ghir_D02G011700	Ghir_A09G025920		Ghir_D04G020290
	Ghir_A06G004120	Ghir_D05G003780		Ghir_D09G016990	Ghir_D05G004010		Ghir_D03G018680	Ghir_A06G017030	Ghir_D11G021430		Ghir_D02G011930	Ghir_A09G025970		Ghir_D04G020330
	Ghir_A06G004150	Ghir_D05G003890		Ghir_D09G017180	Ghir_D05G004260		Ghir_D03G018790	Ghir_A06G017090	Ghir_D11G021700		Ghir_D02G012170	Ghir_A09G026320		Ghir_D05G000030
	Ghir_A06G004260	Ghir_D05G004280		Ghir_D09G017720	Ghir_D05G004310		Ghir_D03G018920	Ghir_A06G017140	Ghir_D11G021930		Ghir_D02G012330	Ghir_A09G026360		Ghir_D05G000210
	Ghir_A06G004380	Ghir_D05G004450		Ghir_D09G017830	Ghir_D05G004770		Ghir_D03G019030	Ghir_A06G017270	Ghir_D11G022730		Ghir_D02G012650	Ghir_A10G000360		Ghir_D05G000230
	Ghir_A06G004540	Ghir_D05G004960		Ghir_D09G018220	Ghir_D05G005180		Ghir_D03G019160	Ghir_A06G017900	Ghir_D11G024300		Ghir_D02G013240	Ghir_A10G000520		Ghir_D05G000690
	Ghir_A06G004560	Ghir_D05G005590		Ghir_D09G018690	Ghir_D05G005610		Ghir_D04G000150	Ghir_A06G017930	Ghir_D11G024560		Ghir_D02G013370	Ghir_A10G000570		Ghir_D05G000970
	Ghir_A06G004580	Ghir_D05G005960		Ghir_D09G018750	Ghir_D05G005850		Ghir_D04G000360	Ghir_A06G018070	Ghir_D11G025060		Ghir_D02G014240	Ghir_A10G000830		Ghir_D05G001040
	Ghir_A06G004640	Ghir_D05G006180		Ghir_D09G019820	Ghir_D05G005930		Ghir_D04G000580	Ghir_A06G018210	Ghir_D11G025480		Ghir_D02G015330	Ghir_A10G001070		Ghir_D05G001460
	Ghir_A06G004940	Ghir_D05G006560		Ghir_D09G021420	Ghir_D05G006730		Ghir_D04G000860	Ghir_A06G018430	Ghir_D11G025490		Ghir_D02G015850	Ghir_A10G001390		Ghir_D05G001750
	Ghir_A06G004960	Ghir_D05G007110		Ghir_D09G021650	Ghir_D05G006910		Ghir_D04G001010	Ghir_A06G018530	Ghir_D11G025670		Ghir_D02G017710	Ghir_A10G001400		Ghir_D05G001880
	Ghir_A06G005170	Ghir_D05G007770		Ghir_D09G022260	Ghir_D05G007310		Ghir_D04G001720	Ghir_A06G018570	Ghir_D11G030000		Ghir_D02G017750	Ghir_A10G001590		Ghir_D05G001980
	Ghir_A06G005180	Ghir_D05G007910		Ghir_D09G022850	Ghir_D05G007680		Ghir_D04G001830	Ghir_A06G018620	Ghir_D11G030120		Ghir_D02G018450	Ghir_A10G001690		Ghir_D05G002340
	Ghir_A06G005220	Ghir_D05G007980		Ghir_D09G023570	Ghir_D05G008120		Ghir_D04G001870	Ghir_A06G018790	Ghir_D11G031890		Ghir_D02G018570	Ghir_A10G001810		Ghir_D05G002900
	Ghir_A06G005590	Ghir_D05G008080		Ghir_D09G024980	Ghir_D05G008200		Ghir_D04G003260	Ghir_A06G018910	Ghir_D11G032270		Ghir_D02G018740	Ghir_A10G002030		Ghir_D05G003010
	Ghir_A06G005600	Ghir_D05G008450		Ghir_D09G025050	Ghir_D05G008850		Ghir_D04G003320	Ghir_A06G019080	Ghir_D11G032610		Ghir_D02G019360	Ghir_A10G002090		Ghir_D05G003100
	Ghir_A06G005740	Ghir_D05G009210		Ghir_D10G000220	Ghir_D05G009020		Ghir_D04G003400	Ghir_A06G019160	Ghir_D11G032720		Ghir_D02G019400	Ghir_A10G002100		Ghir_D05G003260
	Ghir_A06G005910	Ghir_D05G009360		Ghir_D10G000340	Ghir_D05G009080		Ghir_D04G003440	Ghir_A06G019320	Ghir_D11G033070		Ghir_D02G019490	Ghir_A10G002260		Ghir_D05G003490
	Ghir_A06G006300	Ghir_D05G009440		Ghir_D10G000530	Ghir_D05G009260		Ghir_D04G003610	Ghir_A06G019330	Ghir_D11G035180		Ghir_D02G019580	Ghir_A10G002690		Ghir_D05G003550
	Ghir_A06G006510	Ghir_D05G009620		Ghir_D10G000550	Ghir_D05G009390		Ghir_D04G004120	Ghir_A06G019510	Ghir_D11G035510		Ghir_D02G019800	Ghir_A10G002740		Ghir_D05G003890
	Ghir_A06G006770	Ghir_D05G010190		Ghir_D10G000580	Ghir_D05G009700		Ghir_D04G004310	Ghir_A06G019830	Ghir_D12G000290		Ghir_D02G019860	Ghir_A10G002830		Ghir_D05G004710
	Ghir_A06G006960	Ghir_D05G010320		Ghir_D10G000590	Ghir_D05G009720		Ghir_D04G004380	Ghir_A06G019930	Ghir_D12G001050		Ghir_D02G019960	Ghir_A10G003120		Ghir_D05G005140
	Ghir_A06G007030	Ghir_D05G011110		Ghir_D10G000810	Ghir_D05G009950		Ghir_D04G004960	Ghir_A06G019940	Ghir_D12G001710		Ghir_D02G020060	Ghir_A10G003140		Ghir_D05G005430
	Ghir_A06G007350	Ghir_D05G012170		Ghir_D10G001190	Ghir_D05G009960		Ghir_D04G005190	Ghir_A06G020040	Ghir_D12G001790		Ghir_D02G020290	Ghir_A10G003230		Ghir_D05G005960
	Ghir_A06G007500	Ghir_D05G012570		Ghir_D10G001650	Ghir_D05G010260		Ghir_D04G006100	Ghir_A06G020070	Ghir_D12G001940		Ghir_D02G020360	Ghir_A10G003250		Ghir_D05G006560
	Ghir_A06G007550	Ghir_D05G012660		Ghir_D10G001750	Ghir_D05G010830		Ghir_D04G006930	Ghir_A06G020110	Ghir_D12G002630		Ghir_D02G020690	Ghir_A10G003370		Ghir_D05G006870
	Ghir_A06G007580	Ghir_D05G012810		Ghir_D10G002160	Ghir_D05G011120		Ghir_D04G007400	Ghir_A06G020350	Ghir_D12G002720		Ghir_D02G020970	Ghir_A10G003540		Ghir_D05G006970
	Ghir_A06G007680	Ghir_D05G012970		Ghir_D10G003840	Ghir_D05G011190		Ghir_D04G007760	Ghir_A06G020460	Ghir_D12G003630		Ghir_D02G021550	Ghir_A10G003670		Ghir_D05G007320
	Ghir_A06G007700	Ghir_D05G013060		Ghir_D10G004000	Ghir_D05G011570		Ghir_D04G008390	Ghir_A06G020830	Ghir_D12G004460		Ghir_D02G021570	Ghir_A10G003690		Ghir_D05G007460
	Ghir_A06G007920	Ghir_D05G013830		Ghir_D10G004200	Ghir_D05G011890		Ghir_D04G008600	Ghir_A06G020900	Ghir_D12G005480		Ghir_D02G021920	Ghir_A10G003800		Ghir_D05G007580
	Ghir_A06G007990	Ghir_D05G014800		Ghir_D10G006360	Ghir_D05G013040		Ghir_D04G008640	Ghir_A06G021160	Ghir_D12G006830		Ghir_D02G022120	Ghir_A10G004220		Ghir_D05G007800
	Ghir_A06G008030	Ghir_D05G014850		Ghir_D10G006750	Ghir_D05G013250		Ghir_D04G009190	Ghir_A06G021240	Ghir_D12G006950		Ghir_D02G022270	Ghir_A10G004450		Ghir_D05G007980
	Ghir_A06G008070	Ghir_D05G015820		Ghir_D10G007490	Ghir_D05G014250		Ghir_D04G009900	Ghir_A06G021330	Ghir_D12G007610		Ghir_D02G022700	Ghir_A10G004530		Ghir_D05G008010
	Ghir_A06G008110	Ghir_D05G016350		Ghir_D10G007580	Ghir_D05G014980		Ghir_D04G010350	Ghir_A06G021350	Ghir_D12G008450		Ghir_D02G022710	Ghir_A10G005030		Ghir_D05G008080
	Ghir_A06G008150	Ghir_D05G016360		Ghir_D10G008330	Ghir_D05G015140		Ghir_D04G010940	Ghir_A06G021500	Ghir_D12G009450		Ghir_D02G023080	Ghir_A10G005090		Ghir_D05G008780
	Ghir_A06G008290	Ghir_D05G016780		Ghir_D10G008530	Ghir_D05G015390		Ghir_D04G011060	Ghir_A06G021600	Ghir_D12G009790		Ghir_D02G023150	Ghir_A10G005140		Ghir_D05G008880
	Ghir_A06G008500	Ghir_D05G017500		Ghir_D10G008540	Ghir_D05G015430		Ghir_D04G012370	Ghir_A06G021660	Ghir_D12G009830		Ghir_D02G023260	Ghir_A10G005150		Ghir_D05G009050
	Ghir_A06G008570	Ghir_D05G017830		Ghir_D10G008620	Ghir_D05G016310		Ghir_D04G012430	Ghir_A06G021850	Ghir_D12G010480		Ghir_D02G023510	Ghir_A10G005520		Ghir_D05G009330
	Ghir_A06G008640	Ghir_D05G018560		Ghir_D10G009210	Ghir_D05G016550		Ghir_D04G013440	Ghir_A06G022030	Ghir_D12G011340		Ghir_D02G023520	Ghir_A10G005760		Ghir_D05G009620
	Ghir_A06G008680	Ghir_D05G018800		Ghir_D10G009780	Ghir_D05G016980		Ghir_D04G013790	Ghir_A06G022290	Ghir_D12G012300		Ghir_D02G023560	Ghir_A10G006180		Ghir_D05G009680
	Ghir_A06G008770	Ghir_D05G019130		Ghir_D10G012240	Ghir_D05G017130		Ghir_D04G013940	Ghir_A06G022300	Ghir_D12G012470		Ghir_D02G023960	Ghir_A10G006360		Ghir_D05G009790
	Ghir_A06G008800	Ghir_D05G019220		Ghir_D10G012380	Ghir_D05G017140		Ghir_D04G014790	Ghir_A06G022320	Ghir_D12G012760		Ghir_D02G023980	Ghir_A10G006530		Ghir_D05G009800
	Ghir_A06G009090	Ghir_D05G019420		Ghir_D10G012510	Ghir_D05G017470		Ghir_D04G015180	Ghir_A06G022390	Ghir_D12G018960		Ghir_D02G024110	Ghir_A10G006650		Ghir_D05G010060
	Ghir_A06G009210	Ghir_D05G020560		Ghir_D10G013200	Ghir_D05G017530		Ghir_D04G015430	Ghir_A06G022410	Ghir_D12G019000		Ghir_D02G024960	Ghir_A10G006740		Ghir_D05G010190
	Ghir_A06G009220	Ghir_D05G021020		Ghir_D10G013270	Ghir_D05G017590		Ghir_D04G015500	Ghir_A06G022430	Ghir_D12G019330		Ghir_D02G024970	Ghir_A10G007100		Ghir_D05G011110
	Ghir_A06G009240	Ghir_D05G021440		Ghir_D10G014530	Ghir_D05G017790		Ghir_D04G015610	Ghir_A06G022550	Ghir_D12G019790		Ghir_D03G000150	Ghir_A10G007120		Ghir_D05G011230
	Ghir_A06G009370	Ghir_D05G021510		Ghir_D10G014980	Ghir_D05G017820		Ghir_D04G016360	Ghir_A06G022560	Ghir_D12G020100		Ghir_D03G000570	Ghir_A10G007770		Ghir_D05G011410
	Ghir_A06G009890	Ghir_D05G022420		Ghir_D10G015000	Ghir_D05G017980		Ghir_D04G016830	Ghir_A06G022570	Ghir_D12G020110		Ghir_D03G000670	Ghir_A10G008030		Ghir_D05G011640
	Ghir_A06G009990	Ghir_D05G022590		Ghir_D10G015250	Ghir_D05G018350		Ghir_D04G016970	Ghir_A06G022650	Ghir_D12G020660		Ghir_D03G000840	Ghir_A10G008100		Ghir_D05G011910
	Ghir_A06G010040	Ghir_D05G022660		Ghir_D10G015950	Ghir_D05G019050		Ghir_D04G017160	Ghir_A06G022670	Ghir_D12G021280		Ghir_D03G001130	Ghir_A10G008240		Ghir_D05G012870
	Ghir_A06G010080	Ghir_D05G022710		Ghir_D10G016200	Ghir_D05G020410		Ghir_D04G017310	Ghir_A06G022740	Ghir_D12G021480		Ghir_D03G001300	Ghir_A10G008290		Ghir_D05G012890
	Ghir_A06G010130	Ghir_D05G023060		Ghir_D10G017910	Ghir_D05G020440		Ghir_D04G017440	Ghir_A06G022890	Ghir_D12G021560		Ghir_D03G001500	Ghir_A10G008340		Ghir_D05G012970
	Ghir_A06G010190	Ghir_D05G023190		Ghir_D10G018490	Ghir_D05G020640		Ghir_D04G017840	Ghir_A07G000060	Ghir_D12G021840		Ghir_D03G002490	Ghir_A10G008420		Ghir_D05G013030
	Ghir_A06G010200	Ghir_D05G023370		Ghir_D10G019310	Ghir_D05G020700		Ghir_D04G017910	Ghir_A07G000140	Ghir_D12G022150		Ghir_D03G002510	Ghir_A10G008520		Ghir_D05G013410
	Ghir_A06G010240	Ghir_D05G023530		Ghir_D10G019750	Ghir_D05G020770		Ghir_D04G018070	Ghir_A07G000310	Ghir_D12G022670		Ghir_D03G002950	Ghir_A10G008840		Ghir_D05G013420
	Ghir_A06G010250	Ghir_D05G023720		Ghir_D10G019790	Ghir_D05G020990		Ghir_D04G018270	Ghir_A07G000330	Ghir_D12G023900		Ghir_D03G003540	Ghir_A10G009390		Ghir_D05G014430
	Ghir_A06G010370	Ghir_D05G023800		Ghir_D10G020080	Ghir_D05G021040		Ghir_D04G019590	Ghir_A07G000460	Ghir_D12G024110		Ghir_D03G003920	Ghir_A10G009850		Ghir_D05G014800
	Ghir_A06G010500	Ghir_D05G024110		Ghir_D10G020950	Ghir_D05G021400		Ghir_D04G019600	Ghir_A07G000480	Ghir_D12G025460		Ghir_D03G004190	Ghir_A10G009880		Ghir_D05G014820
	Ghir_A06G010530	Ghir_D05G024400		Ghir_D10G021420	Ghir_D05G021450		Ghir_D04G019640	Ghir_A07G000560	Ghir_D12G025470		Ghir_D03G004580	Ghir_A10G009980		Ghir_D05G014850
	Ghir_A06G010730	Ghir_D05G024590		Ghir_D10G022620	Ghir_D05G022370		Ghir_D04G019830	Ghir_A07G000730	Ghir_D12G025800		Ghir_D03G005600	Ghir_A10G010090		Ghir_D05G015130
	Ghir_A06G010830	Ghir_D05G024600		Ghir_D10G024200	Ghir_D05G022720		Ghir_D04G019970	Ghir_A07G000790	Ghir_D12G026070		Ghir_D03G005910	Ghir_A10G010430		Ghir_D05G015220
	Ghir_A06G010850	Ghir_D05G024700		Ghir_D10G024440	Ghir_D05G022770		Ghir_D04G020200	Ghir_A07G001320	Ghir_D12G027300		Ghir_D03G006640	Ghir_A10G011190		Ghir_D05G015380
	Ghir_A06G010900	Ghir_D05G025100		Ghir_D10G024570	Ghir_D05G022870		Ghir_D04G020290	Ghir_A07G001440	Ghir_D12G027540		Ghir_D03G006910	Ghir_A10G011300		Ghir_D05G015450
	Ghir_A06G011050	Ghir_D05G025130		Ghir_D10G025170	Ghir_D05G023420		Ghir_D04G020330	Ghir_A07G001710	Ghir_D12G028090		Ghir_D03G007070	Ghir_A10G011970		Ghir_D05G015600
	Ghir_A06G011150	Ghir_D05G025300		Ghir_D10G025270	Ghir_D05G023460		Ghir_D04G020690	Ghir_A07G001730	Ghir_D12G028210		Ghir_D03G007150	Ghir_A10G012130		Ghir_D05G015820
	Ghir_A06G011190	Ghir_D05G025580		Ghir_D10G026720	Ghir_D05G023520		Ghir_D05G000140	Ghir_A07G001910	Ghir_D13G001130		Ghir_D03G007450	Ghir_A10G012320		Ghir_D05G016020
	Ghir_A06G011250	Ghir_D05G026010		Ghir_D10G027680	Ghir_D05G024120		Ghir_D05G000210	Ghir_A07G002050	Ghir_D13G001720		Ghir_D03G008210	Ghir_A10G012430		Ghir_D05G016230
	Ghir_A06G011330	Ghir_D05G026430		Ghir_D10G027690	Ghir_D05G024210		Ghir_D05G000690	Ghir_A07G002100	Ghir_D13G003300		Ghir_D03G008300	Ghir_A10G013220		Ghir_D05G016360
	Ghir_A06G011640	Ghir_D05G026630		Ghir_D11G001300	Ghir_D05G024240		Ghir_D05G000850	Ghir_A07G002270	Ghir_D13G004120		Ghir_D03G009350	Ghir_A10G013740		Ghir_D05G016450
	Ghir_A06G011900	Ghir_D05G026680		Ghir_D11G001380	Ghir_D05G024380		Ghir_D05G000970	Ghir_A07G002300	Ghir_D13G004490		Ghir_D03G009840	Ghir_A10G013760		Ghir_D05G016590
	Ghir_A06G012000	Ghir_D05G026770		Ghir_D11G002060	Ghir_D05G025900		Ghir_D05G001320	Ghir_A07G002340	Ghir_D13G004970		Ghir_D03G010080	Ghir_A10G013920		Ghir_D05G016600
	Ghir_A06G012010	Ghir_D05G026910		Ghir_D11G002210	Ghir_D05G025930		Ghir_D05G001830	Ghir_A07G002350	Ghir_D13G005540		Ghir_D03G010570	Ghir_A10G014310		Ghir_D05G016920
	Ghir_A06G012020	Ghir_D05G027190		Ghir_D11G002870	Ghir_D05G026150		Ghir_D05G001880	Ghir_A07G002450	Ghir_D13G007310		Ghir_D03G010730	Ghir_A10G014700		Ghir_D05G016970
	Ghir_A06G012070	Ghir_D05G027580		Ghir_D11G002990	Ghir_D05G026760		Ghir_D05G002340	Ghir_A07G002510	Ghir_D13G008190		Ghir_D03G011020	Ghir_A10G014840		Ghir_D05G017500
	Ghir_A06G012130	Ghir_D05G027690		Ghir_D11G003060	Ghir_D05G027230		Ghir_D05G002500	Ghir_A07G002800	Ghir_D13G008840		Ghir_D03G011590	Ghir_A10G014850		Ghir_D05G017540
	Ghir_A06G012150	Ghir_D05G028150		Ghir_D11G003270	Ghir_D05G027770		Ghir_D05G002900	Ghir_A07G003320	Ghir_D13G009510		Ghir_D03G012470	Ghir_A10G014920		Ghir_D05G017750
	Ghir_A06G012180	Ghir_D05G028270		Ghir_D11G003360	Ghir_D05G028620		Ghir_D05G002910	Ghir_A07G003450	Ghir_D13G010200		Ghir_D03G013160	Ghir_A10G015110		Ghir_D05G018120
	Ghir_A06G012340	Ghir_D05G028360		Ghir_D11G003570	Ghir_D05G030180		Ghir_D05G003050	Ghir_A07G003570	Ghir_D13G013020		Ghir_D03G013300	Ghir_A10G015360		Ghir_D05G019040
	Ghir_A06G012950	Ghir_D05G028410		Ghir_D11G005310	Ghir_D05G031420		Ghir_D05G003100	Ghir_A07G003600	Ghir_D13G013140		Ghir_D03G013390	Ghir_A10G015770		Ghir_D05G019570
	Ghir_A06G013330	Ghir_D05G028670		Ghir_D11G005350	Ghir_D05G031960		Ghir_D05G003230	Ghir_A07G003630	Ghir_D13G013400		Ghir_D03G013720	Ghir_A10G016690		Ghir_D05G019640
	Ghir_A06G013350	Ghir_D05G029330		Ghir_D11G005390	Ghir_D05G032020		Ghir_D05G003550	Ghir_A07G003720	Ghir_D13G014990		Ghir_D03G013760	Ghir_A10G016840		Ghir_D05G019920
	Ghir_A06G013490	Ghir_D05G030350		Ghir_D11G005800	Ghir_D05G032350		Ghir_D05G003630	Ghir_A07G003810	Ghir_D13G015010		Ghir_D03G014070	Ghir_A10G016850		Ghir_D05G020750
	Ghir_A06G014010	Ghir_D05G031720		Ghir_D11G006000	Ghir_D05G032450		Ghir_D05G004780	Ghir_A07G003840	Ghir_D13G015170		Ghir_D03G014170	Ghir_A10G016880		Ghir_D05G020940
	Ghir_A06G014190	Ghir_D05G031800		Ghir_D11G006370	Ghir_D05G033250		Ghir_D05G005860	Ghir_A07G003870	Ghir_D13G015330		Ghir_D03G014230	Ghir_A10G017040		Ghir_D05G020950
	Ghir_A06G014240	Ghir_D05G031870		Ghir_D11G006580	Ghir_D05G033290		Ghir_D05G006130	Ghir_A07G003940	Ghir_D13G018280		Ghir_D03G014300	Ghir_A10G017050		Ghir_D05G021380
	Ghir_A06G014400	Ghir_D05G031980		Ghir_D11G006790	Ghir_D05G033340		Ghir_D05G006240	Ghir_A07G004020	Ghir_D13G018800		Ghir_D03G014420	Ghir_A10G017200		Ghir_D05G021390
	Ghir_A06G014470	Ghir_D05G032000		Ghir_D11G006980	Ghir_D05G033820		Ghir_D05G006880	Ghir_A07G004210	Ghir_D13G019590		Ghir_D03G014520	Ghir_A10G017280		Ghir_D05G021410
	Ghir_A06G014630	Ghir_D05G032070		Ghir_D11G007030	Ghir_D05G034180		Ghir_D05G006970	Ghir_A07G004310	Ghir_D13G020040		Ghir_D03G014570	Ghir_A10G017360		Ghir_D05G022540
	Ghir_A06G014650	Ghir_D05G032860		Ghir_D11G007540	Ghir_D05G035540		Ghir_D05G007320	Ghir_A07G004320	Ghir_D13G020350		Ghir_D03G015160	Ghir_A10G017440		Ghir_D05G022940
	Ghir_A06G015230	Ghir_D05G033830		Ghir_D11G008090	Ghir_D05G035570		Ghir_D05G007510	Ghir_A07G004370	Ghir_D13G020710		Ghir_D03G015460	Ghir_A10G017530		Ghir_D05G023070
	Ghir_A06G015390	Ghir_D05G034070		Ghir_D11G009950	Ghir_D05G036560		Ghir_D05G008170	Ghir_A07G004460	Ghir_D13G022100		Ghir_D03G015710	Ghir_A10G017640		Ghir_D05G023090
	Ghir_A06G015430	Ghir_D05G035110		Ghir_D11G010580	Ghir_D05G036600		Ghir_D05G008800	Ghir_A07G004470	Ghir_D13G022820		Ghir_D03G015720	Ghir_A10G017750		Ghir_D05G023370
	Ghir_A06G015840	Ghir_D05G036580		Ghir_D11G011260	Ghir_D05G037050		Ghir_D05G008880	Ghir_A07G004740	Ghir_D13G023550		Ghir_D03G016110	Ghir_A10G018110		Ghir_D05G024590
	Ghir_A06G015850	Ghir_D05G036740		Ghir_D11G011870	Ghir_D05G037060		Ghir_D05G009330	Ghir_A07G004860	Ghir_D13G023820		Ghir_D03G016310	Ghir_A10G018580		Ghir_D05G026430
	Ghir_A06G015950	Ghir_D05G037170		Ghir_D11G012180	Ghir_D05G037470		Ghir_D05G009680	Ghir_A07G005090	Ghir_D13G025490		Ghir_D03G016400	Ghir_A10G018610		Ghir_D05G026630
	Ghir_A06G016240	Ghir_D05G037800		Ghir_D11G013080	Ghir_D05G037570		Ghir_D05G009780	Ghir_A07G005290	Ghir_Scaffold2543G000010		Ghir_D03G016610	Ghir_A10G018640		Ghir_D05G026680
	Ghir_A06G016270	Ghir_D05G037810		Ghir_D11G013430	Ghir_D05G038260		Ghir_D05G009790	Ghir_A07G005390	Ghir_Scaffold3028G000080		Ghir_D03G016960	Ghir_A10G018780		Ghir_D05G026770
	Ghir_A06G016310	Ghir_D05G038060		Ghir_D11G014460	Ghir_D05G038300		Ghir_D05G010000	Ghir_A07G005480	Ghir_Scaffold3064G000050		Ghir_D03G017400	Ghir_A10G018990		Ghir_D05G026910
	Ghir_A06G016490	Ghir_D05G038760		Ghir_D11G014510	Ghir_D05G038320		Ghir_D05G011090	Ghir_A07G005560	Ghir_Scaffold735G000010		Ghir_D03G017500	Ghir_A10G019110		Ghir_D05G027110
	Ghir_A06G016510	Ghir_D05G039690		Ghir_D11G015820	Ghir_D05G038850		Ghir_D05G011130	Ghir_A07G005810			Ghir_D03G017560	Ghir_A10G019350		Ghir_D05G027540
	Ghir_A06G016520	Ghir_D05G039710		Ghir_D11G017040	Ghir_D05G038860		Ghir_D05G011230	Ghir_A07G005820			Ghir_D03G018020	Ghir_A10G019460		Ghir_D05G027580
	Ghir_A06G016760	Ghir_D05G039860		Ghir_D11G017630	Ghir_D05G039260		Ghir_D05G011620	Ghir_A07G005830			Ghir_D03G018130	Ghir_A10G019530		Ghir_D05G028270
	Ghir_A06G016910	Ghir_D05G039920		Ghir_D11G017960	Ghir_D06G000090		Ghir_D05G011910	Ghir_A07G006050			Ghir_D03G018570	Ghir_A10G019950		Ghir_D05G028360
	Ghir_A06G017030	Ghir_D06G000020		Ghir_D11G018220	Ghir_D06G000340		Ghir_D05G012380	Ghir_A07G006070			Ghir_D03G018580	Ghir_A10G020550		Ghir_D05G028670
	Ghir_A06G017040	Ghir_D06G000330		Ghir_D11G018820	Ghir_D06G000460		Ghir_D05G012540	Ghir_A07G006260			Ghir_D03G018660	Ghir_A10G020560		Ghir_D05G029510
	Ghir_A06G017270	Ghir_D06G000710		Ghir_D11G018920	Ghir_D06G000610		Ghir_D05G012670	Ghir_A07G006280			Ghir_D03G018680	Ghir_A10G020730		Ghir_D05G030260
	Ghir_A06G017750	Ghir_D06G001950		Ghir_D11G019390	Ghir_D06G000870		Ghir_D05G013030	Ghir_A07G006540			Ghir_D03G018790	Ghir_A10G020870		Ghir_D05G031050
	Ghir_A06G017880	Ghir_D06G002060		Ghir_D11G020570	Ghir_D06G000960		Ghir_D05G013410	Ghir_A07G006550			Ghir_D03G018830	Ghir_A10G020930		Ghir_D05G031270
	Ghir_A06G017900	Ghir_D06G002280		Ghir_D11G020860	Ghir_D06G001870		Ghir_D05G013420	Ghir_A07G006640			Ghir_D03G019130	Ghir_A10G021390		Ghir_D05G031720
	Ghir_A06G017930	Ghir_D06G002520		Ghir_D11G020870	Ghir_D06G002800		Ghir_D05G013750	Ghir_A07G006720			Ghir_D04G000530	Ghir_A10G021460		Ghir_D05G032000
	Ghir_A06G018070	Ghir_D06G003000		Ghir_D11G021290	Ghir_D06G002950		Ghir_D05G014430	Ghir_A07G006830			Ghir_D04G000860	Ghir_A10G021520		Ghir_D05G032540
	Ghir_A06G018110	Ghir_D06G003130		Ghir_D11G021410	Ghir_D06G003610		Ghir_D05G014820	Ghir_A07G006860			Ghir_D04G001360	Ghir_A10G021810		Ghir_D05G032860
	Ghir_A06G018210	Ghir_D06G003410		Ghir_D11G021700	Ghir_D06G004660		Ghir_D05G015130	Ghir_A07G006950			Ghir_D04G001690	Ghir_A10G021970		Ghir_D05G033490
	Ghir_A06G018430	Ghir_D06G003440		Ghir_D11G021720	Ghir_D06G004710		Ghir_D05G015380	Ghir_A07G006980			Ghir_D04G001720	Ghir_A10G022390		Ghir_D05G033800
	Ghir_A06G018460	Ghir_D06G003590		Ghir_D11G022150	Ghir_D06G004780		Ghir_D05G015450	Ghir_A07G007030			Ghir_D04G001830	Ghir_A10G022420		Ghir_D05G036280
	Ghir_A06G018530	Ghir_D06G003720		Ghir_D11G022330	Ghir_D06G005650		Ghir_D05G015600	Ghir_A07G007110			Ghir_D04G001870	Ghir_A10G022510		Ghir_D05G036290
	Ghir_A06G018570	Ghir_D06G003850		Ghir_D11G022920	Ghir_D06G006070		Ghir_D05G016020	Ghir_A07G007160			Ghir_D04G002030	Ghir_A10G022530		Ghir_D05G036390
	Ghir_A06G018620	Ghir_D06G004010		Ghir_D11G023060	Ghir_D06G006540		Ghir_D05G016150	Ghir_A07G007190			Ghir_D04G002280	Ghir_A10G022660		Ghir_D05G036990
	Ghir_A06G018790	Ghir_D06G004220		Ghir_D11G025050	Ghir_D06G006870		Ghir_D05G016230	Ghir_A07G007200			Ghir_D04G002520	Ghir_A10G022700		Ghir_D05G037150
	Ghir_A06G018910	Ghir_D06G004820		Ghir_D11G027940	Ghir_D06G008000		Ghir_D05G016500	Ghir_A07G007540			Ghir_D04G003610	Ghir_A10G022760		Ghir_D05G037580
	Ghir_A06G019080	Ghir_D06G005320		Ghir_D11G028020	Ghir_D06G008170		Ghir_D05G016590	Ghir_A07G007580			Ghir_D04G006490	Ghir_A10G022800		Ghir_D05G037800
	Ghir_A06G019160	Ghir_D06G005710		Ghir_D11G028810	Ghir_D06G008700		Ghir_D05G016850	Ghir_A07G008120			Ghir_D04G006500	Ghir_A10G023160		Ghir_D05G037810
	Ghir_A06G019330	Ghir_D06G005760		Ghir_D11G029020	Ghir_D06G009190		Ghir_D05G016920	Ghir_A07G008270			Ghir_D04G006610	Ghir_A10G023760		Ghir_D05G038390
	Ghir_A06G019450	Ghir_D06G006930		Ghir_D11G029520	Ghir_D06G009550		Ghir_D05G018120	Ghir_A07G008300			Ghir_D04G006720	Ghir_A10G024110		Ghir_D05G038490
	Ghir_A06G019510	Ghir_D06G007010		Ghir_D11G030000	Ghir_D06G010970		Ghir_D05G019040	Ghir_A07G008320			Ghir_D04G007240	Ghir_A10G024340		Ghir_D05G039030
	Ghir_A06G019880	Ghir_D06G007150		Ghir_D11G030080	Ghir_D06G011040		Ghir_D05G019410	Ghir_A07G008340			Ghir_D04G008390	Ghir_A10G024550		Ghir_D05G039200
	Ghir_A06G019940	Ghir_D06G007160		Ghir_D11G031650	Ghir_D06G011340		Ghir_D05G019480	Ghir_A07G008460			Ghir_D04G008460	Ghir_A10G024660		Ghir_D05G039270
	Ghir_A06G020040	Ghir_D06G008430		Ghir_D11G032300	Ghir_D06G011630		Ghir_D05G020940	Ghir_A07G008540			Ghir_D04G008580	Ghir_A11G000320		Ghir_D05G039920
	Ghir_A06G020070	Ghir_D06G008480		Ghir_D11G032610	Ghir_D06G012020		Ghir_D05G021360	Ghir_A07G008560			Ghir_D04G009620	Ghir_A11G000480		Ghir_D06G000220
	Ghir_A06G020090	Ghir_D06G008490		Ghir_D11G032720	Ghir_D06G012120		Ghir_D05G021390	Ghir_A07G008570			Ghir_D04G010560	Ghir_A11G000840		Ghir_D06G000700
	Ghir_A06G020110	Ghir_D06G009080		Ghir_D11G033050	Ghir_D06G012340		Ghir_D05G021410	Ghir_A07G008660			Ghir_D04G010680	Ghir_A11G000880		Ghir_D06G001000
	Ghir_A06G020350	Ghir_D06G009240		Ghir_D11G033870	Ghir_D06G013450		Ghir_D05G022540	Ghir_A07G008670			Ghir_D04G011010	Ghir_A11G001150		Ghir_D06G001600
	Ghir_A06G020450	Ghir_D06G009800		Ghir_D11G034530	Ghir_D06G015410		Ghir_D05G023090	Ghir_A07G008760			Ghir_D04G011350	Ghir_A11G001250		Ghir_D06G001770
	Ghir_A06G020460	Ghir_D06G009810		Ghir_D11G034870	Ghir_D06G015470		Ghir_D05G023270	Ghir_A07G008930			Ghir_D04G011630	Ghir_A11G001570		Ghir_D06G003290
	Ghir_A06G020830	Ghir_D06G010310		Ghir_D11G035850	Ghir_D06G015990		Ghir_D05G023980	Ghir_A07G008970			Ghir_D04G012080	Ghir_A11G002830		Ghir_D06G003480
	Ghir_A06G020900	Ghir_D06G010650		Ghir_D12G000160	Ghir_D06G016230		Ghir_D05G024630	Ghir_A07G009170			Ghir_D04G012330	Ghir_A11G003130		Ghir_D06G003850
	Ghir_A06G021160	Ghir_D06G011460		Ghir_D12G000720	Ghir_D06G016510		Ghir_D05G025010	Ghir_A07G009250			Ghir_D04G012370	Ghir_A11G003300		Ghir_D06G004480
	Ghir_A06G021240	Ghir_D06G011470		Ghir_D12G001050	Ghir_D06G016720		Ghir_D05G025070	Ghir_A07G009550			Ghir_D04G012500	Ghir_A11G003310		Ghir_D06G004940
	Ghir_A06G021350	Ghir_D06G011510		Ghir_D12G001090	Ghir_D06G016880		Ghir_D05G025260	Ghir_A07G009560			Ghir_D04G012840	Ghir_A11G003330		Ghir_D06G005320
	Ghir_A06G021500	Ghir_D06G013830		Ghir_D12G001590	Ghir_D06G017060		Ghir_D05G025410	Ghir_A07G009630			Ghir_D04G012890	Ghir_A11G003510		Ghir_D06G005470
	Ghir_A06G021530	Ghir_D06G013890		Ghir_D12G002180	Ghir_D06G017080		Ghir_D05G025530	Ghir_A07G010080			Ghir_D04G013030	Ghir_A11G003580		Ghir_D06G005500
	Ghir_A06G021600	Ghir_D06G014170		Ghir_D12G002320	Ghir_D06G017230		Ghir_D05G025850	Ghir_A07G010130			Ghir_D04G013230	Ghir_A11G003630		Ghir_D06G005600
	Ghir_A06G021660	Ghir_D06G014600		Ghir_D12G002720	Ghir_D06G017390		Ghir_D05G026670	Ghir_A07G010310			Ghir_D04G013440	Ghir_A11G004130		Ghir_D06G005840
	Ghir_A06G021720	Ghir_D06G014660		Ghir_D12G003630	Ghir_D06G017400		Ghir_D05G026700	Ghir_A07G010630			Ghir_D04G013810	Ghir_A11G004160		Ghir_D06G006460
	Ghir_A06G021850	Ghir_D06G014900		Ghir_D12G004570	Ghir_D06G018550		Ghir_D05G026730	Ghir_A07G010650			Ghir_D04G014960	Ghir_A11G004320		Ghir_D06G006780
	Ghir_A06G022300	Ghir_D06G014950		Ghir_D12G004920	Ghir_D06G018560		Ghir_D05G027110	Ghir_A07G011030			Ghir_D04G015230	Ghir_A11G004630		Ghir_D06G007160
	Ghir_A06G022320	Ghir_D06G015440		Ghir_D12G004970	Ghir_D06G018770		Ghir_D05G027290	Ghir_A07G011050			Ghir_D04G015610	Ghir_A11G005200		Ghir_D06G008630
	Ghir_A06G022390	Ghir_D06G015610		Ghir_D12G005210	Ghir_D06G018810		Ghir_D05G027990	Ghir_A07G011200			Ghir_D04G016290	Ghir_A11G005710		Ghir_D06G009240
	Ghir_A06G022410	Ghir_D06G015910		Ghir_D12G005600	Ghir_D06G019440		Ghir_D05G028380	Ghir_A07G011310			Ghir_D04G016430	Ghir_A11G005720		Ghir_D06G009330
	Ghir_A06G022420	Ghir_D06G015920		Ghir_D12G007790	Ghir_D06G020260		Ghir_D05G029510	Ghir_A07G011350			Ghir_D04G016470	Ghir_A11G005820		Ghir_D06G009480
	Ghir_A06G022430	Ghir_D06G017480		Ghir_D12G007930	Ghir_D06G021080		Ghir_D05G030080	Ghir_A07G012110			Ghir_D04G017350	Ghir_A11G006160		Ghir_D06G009670
	Ghir_A06G022540	Ghir_D06G017860		Ghir_D12G009600	Ghir_D06G021580		Ghir_D05G030330	Ghir_A07G012300			Ghir_D04G017360	Ghir_A11G006210		Ghir_D06G010390
	Ghir_A06G022560	Ghir_D06G017900		Ghir_D12G009610	Ghir_D06G021710		Ghir_D05G031490	Ghir_A07G012630			Ghir_D04G017820	Ghir_A11G006220		Ghir_D06G011650
	Ghir_A06G022570	Ghir_D06G018590		Ghir_D12G009710	Ghir_D06G021890		Ghir_D05G032540	Ghir_A07G012660			Ghir_D04G017840	Ghir_A11G006240		Ghir_D06G012110
	Ghir_A06G022650	Ghir_D06G018970		Ghir_D12G010310	Ghir_D06G022410		Ghir_D05G033800	Ghir_A07G012770			Ghir_D04G018320	Ghir_A11G006420		Ghir_D06G013080
	Ghir_A06G022740	Ghir_D06G019750		Ghir_D12G010590	Ghir_D06G022730		Ghir_D05G034050	Ghir_A07G013030			Ghir_D04G018430	Ghir_A11G006660		Ghir_D06G013090
	Ghir_A06G022800	Ghir_D06G020070		Ghir_D12G010720	Ghir_D06G022780		Ghir_D05G034260	Ghir_A07G013060			Ghir_D04G019600	Ghir_A11G006900		Ghir_D06G013270
	Ghir_A07G000140	Ghir_D06G020200		Ghir_D12G011110	Ghir_D06G023050		Ghir_D05G034880	Ghir_A07G013110			Ghir_D04G019640	Ghir_A11G006930		Ghir_D06G013290
	Ghir_A07G000160	Ghir_D06G020210		Ghir_D12G011730	Ghir_D06G023110		Ghir_D05G036280	Ghir_A07G013130			Ghir_D04G019930	Ghir_A11G006940		Ghir_D06G013600
	Ghir_A07G000310	Ghir_D06G020600		Ghir_D12G011820	Ghir_D06G023120		Ghir_D05G036390	Ghir_A07G013760			Ghir_D04G019970	Ghir_A11G007200		Ghir_D06G013880
	Ghir_A07G000330	Ghir_D06G020640		Ghir_D12G012720	Ghir_D06G023410		Ghir_D05G036990	Ghir_A07G013980			Ghir_D04G020270	Ghir_A11G007360		Ghir_D06G014140
	Ghir_A07G000460	Ghir_D06G020970		Ghir_D12G012800	Ghir_D07G000010		Ghir_D05G037150	Ghir_A07G014040			Ghir_D05G000140	Ghir_A11G007960		Ghir_D06G014170
	Ghir_A07G000480	Ghir_D06G021630		Ghir_D12G012850	Ghir_D07G000520		Ghir_D05G037580	Ghir_A07G014090			Ghir_D05G000500	Ghir_A11G008330		Ghir_D06G014920
	Ghir_A07G000520	Ghir_D06G022210		Ghir_D12G012970	Ghir_D07G000960		Ghir_D05G038390	Ghir_A07G014120			Ghir_D05G000850	Ghir_A11G008360		Ghir_D06G014950
	Ghir_A07G000580	Ghir_D06G022310		Ghir_D12G014260	Ghir_D07G001050		Ghir_D05G038490	Ghir_A07G014210			Ghir_D05G001000	Ghir_A11G008580		Ghir_D06G015030
	Ghir_A07G000640	Ghir_D06G022620		Ghir_D12G014350	Ghir_D07G001210		Ghir_D05G039030	Ghir_A07G014480			Ghir_D05G001330	Ghir_A11G008630		Ghir_D06G015270
	Ghir_A07G000730	Ghir_D06G022670		Ghir_D12G014500	Ghir_D07G001590		Ghir_D05G039120	Ghir_A07G014490			Ghir_D05G001590	Ghir_A11G008870		Ghir_D06G015370
	Ghir_A07G000790	Ghir_D06G022710		Ghir_D12G015360	Ghir_D07G002020		Ghir_D05G039200	Ghir_A07G014520			Ghir_D05G002620	Ghir_A11G008990		Ghir_D06G015440
	Ghir_A07G000950	Ghir_D06G023040		Ghir_D12G015960	Ghir_D07G002370		Ghir_D05G039270	Ghir_A07G014630			Ghir_D05G003050	Ghir_A11G009110		Ghir_D06G015610
	Ghir_A07G001180	Ghir_D06G023090		Ghir_D12G016510	Ghir_D07G002440		Ghir_D06G000220	Ghir_A07G014670			Ghir_D05G003230	Ghir_A11G009780		Ghir_D06G015660
	Ghir_A07G001330	Ghir_D06G023220		Ghir_D12G016700	Ghir_D07G003210		Ghir_D06G000700	Ghir_A07G014720			Ghir_D05G003390	Ghir_A11G009800		Ghir_D06G016520
	Ghir_A07G001360	Ghir_D06G023290		Ghir_D12G017080	Ghir_D07G003220		Ghir_D06G000900	Ghir_A07G014750			Ghir_D05G003410	Ghir_A11G010150		Ghir_D06G016540
	Ghir_A07G001420	Ghir_D06G023650		Ghir_D12G017230	Ghir_D07G004190		Ghir_D06G001000	Ghir_A07G014830			Ghir_D05G003780	Ghir_A11G010170		Ghir_D06G017420
	Ghir_A07G001440	Ghir_D07G000330		Ghir_D12G017620	Ghir_D07G004240		Ghir_D06G001400	Ghir_A07G014880			Ghir_D05G004280	Ghir_A11G010440		Ghir_D06G017450
	Ghir_A07G001660	Ghir_D07G000490		Ghir_D12G017820	Ghir_D07G005290		Ghir_D06G001440	Ghir_A07G014890			Ghir_D05G004780	Ghir_A11G010690		Ghir_D06G017580
	Ghir_A07G001710	Ghir_D07G001360		Ghir_D12G018300	Ghir_D07G005320		Ghir_D06G002210	Ghir_A07G014930			Ghir_D05G005090	Ghir_A11G010760		Ghir_D06G017900
	Ghir_A07G001730	Ghir_D07G001610		Ghir_D12G019420	Ghir_D07G005410		Ghir_D06G002410	Ghir_A07G014960			Ghir_D05G005360	Ghir_A11G010820		Ghir_D06G018140
	Ghir_A07G001800	Ghir_D07G001870		Ghir_D12G019610	Ghir_D07G005570		Ghir_D06G002630	Ghir_A07G015130			Ghir_D05G005680	Ghir_A11G010950		Ghir_D06G018360
	Ghir_A07G001910	Ghir_D07G001880		Ghir_D12G019740	Ghir_D07G005810		Ghir_D06G003240	Ghir_A07G015220			Ghir_D05G005860	Ghir_A11G011000		Ghir_D06G018580
	Ghir_A07G002000	Ghir_D07G002000		Ghir_D12G020740	Ghir_D07G005940		Ghir_D06G003460	Ghir_A07G015290			Ghir_D05G006350	Ghir_A11G011400		Ghir_D06G018970
	Ghir_A07G002050	Ghir_D07G002390		Ghir_D12G022120	Ghir_D07G006740		Ghir_D06G003790	Ghir_A07G015380			Ghir_D05G006860	Ghir_A11G011430		Ghir_D06G019190
	Ghir_A07G002100	Ghir_D07G002540		Ghir_D12G022160	Ghir_D07G007160		Ghir_D06G004070	Ghir_A07G015660			Ghir_D05G007990	Ghir_A11G011520		Ghir_D06G019230
	Ghir_A07G002300	Ghir_D07G002630		Ghir_D12G022470	Ghir_D07G007390		Ghir_D06G004480	Ghir_A07G015890			Ghir_D05G008090	Ghir_A11G011600		Ghir_D06G019700
	Ghir_A07G002340	Ghir_D07G003410		Ghir_D12G024000	Ghir_D07G007440		Ghir_D06G004600	Ghir_A07G016020			Ghir_D05G008400	Ghir_A11G011760		Ghir_D06G019840
	Ghir_A07G002420	Ghir_D07G003650		Ghir_D12G024360	Ghir_D07G008580		Ghir_D06G004940	Ghir_A07G016060			Ghir_D05G008720	Ghir_A11G012000		Ghir_D06G020050
	Ghir_A07G002450	Ghir_D07G004140		Ghir_D12G024410	Ghir_D07G009670		Ghir_D06G005110	Ghir_A07G016090			Ghir_D05G009490	Ghir_A11G012270		Ghir_D06G020560
	Ghir_A07G002510	Ghir_D07G004380		Ghir_D12G024480	Ghir_D07G010080		Ghir_D06G005570	Ghir_A07G016200			Ghir_D05G009780	Ghir_A11G012670		Ghir_D06G020780
	Ghir_A07G002570	Ghir_D07G004560		Ghir_D12G025260	Ghir_D07G010220		Ghir_D06G005600	Ghir_A07G016250			Ghir_D05G010330	Ghir_A11G012730		Ghir_D06G020860
	Ghir_A07G003030	Ghir_D07G004710		Ghir_D12G026090	Ghir_D07G010360		Ghir_D06G006380	Ghir_A07G016270			Ghir_D05G010430	Ghir_A11G012970		Ghir_D06G020900
	Ghir_A07G003320	Ghir_D07G005100		Ghir_D12G026460	Ghir_D07G010440		Ghir_D06G006460	Ghir_A07G016360			Ghir_D05G010740	Ghir_A11G012990		Ghir_D06G020920
	Ghir_A07G003380	Ghir_D07G005480		Ghir_D12G027060	Ghir_D07G011120		Ghir_D06G006780	Ghir_A07G016540			Ghir_D05G011130	Ghir_A11G013000		Ghir_D06G021260
	Ghir_A07G003450	Ghir_D07G005660		Ghir_D12G027650	Ghir_D07G013890		Ghir_D06G007590	Ghir_A07G016570			Ghir_D05G011200	Ghir_A11G013010		Ghir_D06G021880
	Ghir_A07G003570	Ghir_D07G005860		Ghir_D12G027850	Ghir_D07G015020		Ghir_D06G007750	Ghir_A07G016610			Ghir_D05G013060	Ghir_A11G013340		Ghir_D06G021990
	Ghir_A07G003720	Ghir_D07G006410		Ghir_D12G027910	Ghir_D07G015080		Ghir_D06G008980	Ghir_A07G016620			Ghir_D05G013210	Ghir_A11G013390		Ghir_D06G022010
	Ghir_A07G003770	Ghir_D07G006510		Ghir_D12G028370	Ghir_D07G016330		Ghir_D06G009330	Ghir_A07G016640			Ghir_D05G013870	Ghir_A11G013530		Ghir_D06G022430
	Ghir_A07G003840	Ghir_D07G006520		Ghir_D12G028470	Ghir_D07G016510		Ghir_D06G010390	Ghir_A07G016660			Ghir_D05G014830	Ghir_A11G013570		Ghir_D06G023000
	Ghir_A07G003910	Ghir_D07G006600		Ghir_D12G028560	Ghir_D07G017080		Ghir_D06G010950	Ghir_A07G016710			Ghir_D05G015490	Ghir_A11G013630		Ghir_D06G023040
	Ghir_A07G003970	Ghir_D07G006950		Ghir_D13G000100	Ghir_D07G017430		Ghir_D06G012110	Ghir_A07G017070			Ghir_D05G016500	Ghir_A11G013860		Ghir_D07G000070
	Ghir_A07G003980	Ghir_D07G007120		Ghir_D13G001660	Ghir_D07G017650		Ghir_D06G012490	Ghir_A07G017410			Ghir_D05G016810	Ghir_A11G013880		Ghir_D07G000320
	Ghir_A07G004020	Ghir_D07G007170		Ghir_D13G002460	Ghir_D07G017730		Ghir_D06G013080	Ghir_A07G017420			Ghir_D05G016850	Ghir_A11G013890		Ghir_D07G000580
	Ghir_A07G004210	Ghir_D07G007600		Ghir_D13G003150	Ghir_D07G017950		Ghir_D06G014140	Ghir_A07G017450			Ghir_D05G017010	Ghir_A11G014080		Ghir_D07G000980
	Ghir_A07G004230	Ghir_D07G007820		Ghir_D13G003300	Ghir_D07G018370		Ghir_D06G014230	Ghir_A07G017620			Ghir_D05G018860	Ghir_A11G014090		Ghir_D07G001110
	Ghir_A07G004310	Ghir_D07G007990		Ghir_D13G003460	Ghir_D07G018520		Ghir_D06G014990	Ghir_A07G017700			Ghir_D05G018890	Ghir_A11G014100		Ghir_D07G001990
	Ghir_A07G004370	Ghir_D07G008070		Ghir_D13G003490	Ghir_D07G018990		Ghir_D06G015030	Ghir_A07G017860			Ghir_D05G019220	Ghir_A11G014340		Ghir_D07G003070
	Ghir_A07G004420	Ghir_D07G008110		Ghir_D13G003550	Ghir_D07G019140		Ghir_D06G015270	Ghir_A07G018110			Ghir_D05G019460	Ghir_A11G014500		Ghir_D07G003440
	Ghir_A07G004460	Ghir_D07G008130		Ghir_D13G004300	Ghir_D07G019190		Ghir_D06G015370	Ghir_A07G018290			Ghir_D05G022790	Ghir_A11G014760		Ghir_D07G003470
	Ghir_A07G004470	Ghir_D07G008830		Ghir_D13G004530	Ghir_D07G019250		Ghir_D06G016440	Ghir_A07G018520			Ghir_D05G023610	Ghir_A11G014790		Ghir_D07G003650
	Ghir_A07G004640	Ghir_D07G008980		Ghir_D13G004820	Ghir_D07G019290		Ghir_D06G016520	Ghir_A07G018790			Ghir_D05G023800	Ghir_A11G014860		Ghir_D07G004380
	Ghir_A07G004680	Ghir_D07G009000		Ghir_D13G005610	Ghir_D07G021260		Ghir_D06G016540	Ghir_A07G018820			Ghir_D05G023810	Ghir_A11G014890		Ghir_D07G004560
	Ghir_A07G004740	Ghir_D07G009080		Ghir_D13G006390	Ghir_D07G021510		Ghir_D06G016990	Ghir_A07G018870			Ghir_D05G023950	Ghir_A11G014980		Ghir_D07G004620
	Ghir_A07G004860	Ghir_D07G009190		Ghir_D13G006970	Ghir_D07G022430		Ghir_D06G017330	Ghir_A07G019200			Ghir_D05G024010	Ghir_A11G015000		Ghir_D07G004820
	Ghir_A07G005090	Ghir_D07G009260		Ghir_D13G006990	Ghir_D07G023600		Ghir_D06G017450	Ghir_A07G019370			Ghir_D05G024630	Ghir_A11G015170		Ghir_D07G004930
	Ghir_A07G005290	Ghir_D07G010740		Ghir_D13G008150	Ghir_D07G023630		Ghir_D06G017580	Ghir_A07G019500			Ghir_D05G024690	Ghir_A11G015770		Ghir_D07G005240
	Ghir_A07G005390	Ghir_D07G011020		Ghir_D13G008690	Ghir_D07G024220		Ghir_D06G018140	Ghir_A07G019760			Ghir_D05G024990	Ghir_A11G016070		Ghir_D07G006340
	Ghir_A07G005480	Ghir_D07G011270		Ghir_D13G010170	Ghir_D07G024350		Ghir_D06G018360	Ghir_A07G019860			Ghir_D05G025100	Ghir_A11G016300		Ghir_D07G006620
	Ghir_A07G005560	Ghir_D07G011850		Ghir_D13G010290	Ghir_D07G024430		Ghir_D06G018580	Ghir_A07G019890			Ghir_D05G025170	Ghir_A11G016560		Ghir_D07G007360
	Ghir_A07G005820	Ghir_D07G011960		Ghir_D13G011080	Ghir_D08G000030		Ghir_D06G019060	Ghir_A07G019920			Ghir_D05G025410	Ghir_A11G017030		Ghir_D07G007540
	Ghir_A07G005830	Ghir_D07G012600		Ghir_D13G011100	Ghir_D08G000070		Ghir_D06G019070	Ghir_A07G019990			Ghir_D05G025530	Ghir_A11G017310		Ghir_D07G007570
	Ghir_A07G005890	Ghir_D07G013020		Ghir_D13G012220	Ghir_D08G000190		Ghir_D06G019850	Ghir_A07G020180			Ghir_D05G026010	Ghir_A11G017520		Ghir_D07G007820
	Ghir_A07G005970	Ghir_D07G014630		Ghir_D13G013590	Ghir_D08G002250		Ghir_D06G020050	Ghir_A07G020560			Ghir_D05G026670	Ghir_A11G017540		Ghir_D07G007990
	Ghir_A07G006050	Ghir_D07G014690		Ghir_D13G013950	Ghir_D08G002400		Ghir_D06G020560	Ghir_A07G021030			Ghir_D05G026730	Ghir_A11G017830		Ghir_D07G008000
	Ghir_A07G006260	Ghir_D07G015610		Ghir_D13G015090	Ghir_D08G002590		Ghir_D06G020580	Ghir_A07G021190			Ghir_D05G027430	Ghir_A11G018300		Ghir_D07G008980
	Ghir_A07G006280	Ghir_D07G015740		Ghir_D13G015400	Ghir_D08G002970		Ghir_D06G020610	Ghir_A07G021410			Ghir_D05G027440	Ghir_A11G018420		Ghir_D07G009450
	Ghir_A07G006400	Ghir_D07G016490		Ghir_D13G015680	Ghir_D08G003320		Ghir_D06G020860	Ghir_A07G021450			Ghir_D05G027680	Ghir_A11G018690		Ghir_D07G009970
	Ghir_A07G006540	Ghir_D07G016800		Ghir_D13G015740	Ghir_D08G003370		Ghir_D06G020900	Ghir_A07G021470			Ghir_D05G027690	Ghir_A11G018760		Ghir_D07G010120
	Ghir_A07G006640	Ghir_D07G016980		Ghir_D13G015870	Ghir_D08G003580		Ghir_D06G021550	Ghir_A07G021500			Ghir_D05G027880	Ghir_A11G018890		Ghir_D07G010790
	Ghir_A07G006720	Ghir_D07G017180		Ghir_D13G016280	Ghir_D08G003620		Ghir_D06G021880	Ghir_A07G021610			Ghir_D05G027990	Ghir_A11G018970		Ghir_D07G011020
	Ghir_A07G006830	Ghir_D07G017810		Ghir_D13G016770	Ghir_D08G004300		Ghir_D06G021980	Ghir_A07G021630			Ghir_D05G028060	Ghir_A11G019090		Ghir_D07G011320
	Ghir_A07G006860	Ghir_D07G018340		Ghir_D13G017110	Ghir_D08G005730		Ghir_D06G022000	Ghir_A07G021670			Ghir_D05G028150	Ghir_A11G019200		Ghir_D07G011830
	Ghir_A07G006950	Ghir_D07G018560		Ghir_D13G017550	Ghir_D08G006220		Ghir_D06G022110	Ghir_A07G022320			Ghir_D05G028720	Ghir_A11G019560		Ghir_D07G011910
	Ghir_A07G006980	Ghir_D07G018700		Ghir_D13G017790	Ghir_D08G006530		Ghir_D06G022380	Ghir_A07G022410			Ghir_D05G029280	Ghir_A11G019570		Ghir_D07G012570
	Ghir_A07G007030	Ghir_D07G018780		Ghir_D13G017980	Ghir_D08G006560		Ghir_D06G023520	Ghir_A07G022450			Ghir_D05G029590	Ghir_A11G020080		Ghir_D07G012600
	Ghir_A07G007070	Ghir_D07G018820		Ghir_D13G018270	Ghir_D08G007860		Ghir_D06G023610	Ghir_A07G022560			Ghir_D05G029880	Ghir_A11G020250		Ghir_D07G013490
	Ghir_A07G007110	Ghir_D07G019030		Ghir_D13G018490	Ghir_D08G009420		Ghir_D07G001090	Ghir_A07G022630			Ghir_D05G030080	Ghir_A11G020530		Ghir_D07G013590
	Ghir_A07G007190	Ghir_D07G019500		Ghir_D13G018770	Ghir_D08G010290		Ghir_D07G001110	Ghir_A07G022880			Ghir_D05G030220	Ghir_A11G020660		Ghir_D07G014070
	Ghir_A07G007200	Ghir_D07G019670		Ghir_D13G018840	Ghir_D08G010930		Ghir_D07G001510	Ghir_A07G022970			Ghir_D05G030840	Ghir_A11G020680		Ghir_D07G014340
	Ghir_A07G007540	Ghir_D07G019720		Ghir_D13G019280	Ghir_D08G011040		Ghir_D07G001710	Ghir_A07G023040			Ghir_D05G031190	Ghir_A11G020710		Ghir_D07G014690
	Ghir_A07G007580	Ghir_D07G020260		Ghir_D13G019360	Ghir_D08G011540		Ghir_D07G001990	Ghir_A07G023070			Ghir_D05G031470	Ghir_A11G021260		Ghir_D07G015120
	Ghir_A07G008320	Ghir_D07G020490		Ghir_D13G019590	Ghir_D08G011560		Ghir_D07G003070	Ghir_A07G023080			Ghir_D05G031490	Ghir_A11G021310		Ghir_D07G016310
	Ghir_A07G008340	Ghir_D07G020560		Ghir_D13G019940	Ghir_D08G013940		Ghir_D07G003290	Ghir_A07G023100			Ghir_D05G032070	Ghir_A11G021380		Ghir_D07G016500
	Ghir_A07G008540	Ghir_D07G020590		Ghir_D13G020040	Ghir_D08G014040		Ghir_D07G003470	Ghir_A07G023150			Ghir_D05G032270	Ghir_A11G021470		Ghir_D07G016540
	Ghir_A07G008560	Ghir_D07G020820		Ghir_D13G020350	Ghir_D08G014230		Ghir_D07G004620	Ghir_A07G023490			Ghir_D05G032290	Ghir_A11G021890		Ghir_D07G016800
	Ghir_A07G008570	Ghir_D07G021350		Ghir_D13G021640	Ghir_D08G014530		Ghir_D07G004900	Ghir_A07G023500			Ghir_D05G033810	Ghir_A11G021970		Ghir_D07G016910
	Ghir_A07G008660	Ghir_D07G021390		Ghir_D13G021730	Ghir_D08G014810		Ghir_D07G004930	Ghir_A07G023620			Ghir_D05G034040	Ghir_A11G022120		Ghir_D07G016980
	Ghir_A07G008670	Ghir_D07G021460		Ghir_D13G022170	Ghir_D08G015010		Ghir_D07G005240	Ghir_A07G023820			Ghir_D05G034070	Ghir_A11G022150		Ghir_D07G017460
	Ghir_A07G008900	Ghir_D07G021500		Ghir_D13G022270	Ghir_D08G015060		Ghir_D07G005640	Ghir_A07G024160			Ghir_D05G034080	Ghir_A11G022660		Ghir_D07G017810
	Ghir_A07G008970	Ghir_D07G021550		Ghir_D13G022620	Ghir_D08G015840		Ghir_D07G006400	Ghir_A07G024180			Ghir_D05G034260	Ghir_A11G022770		Ghir_D07G019500
	Ghir_A07G009170	Ghir_D07G022830		Ghir_D13G022820	Ghir_D08G015940		Ghir_D07G006620	Ghir_A07G024850			Ghir_D05G034340	Ghir_A11G023020		Ghir_D07G019720
	Ghir_A07G009560	Ghir_D07G023200		Ghir_D13G024550	Ghir_D08G016360		Ghir_D07G007090	Ghir_A07G025000			Ghir_D05G034620	Ghir_A11G023560		Ghir_D07G019800
	Ghir_A07G010130	Ghir_D07G023510		Ghir_D13G024600	Ghir_D08G016510		Ghir_D07G007310	Ghir_A07G025030			Ghir_D05G035230	Ghir_A11G023600		Ghir_D07G020000
	Ghir_A07G010160	Ghir_D07G024270		Ghir_D13G025580	Ghir_D08G017960		Ghir_D07G007360	Ghir_A08G000160			Ghir_D05G037360	Ghir_A11G023670		Ghir_D07G020260
	Ghir_A07G010190	Ghir_D07G024700		Ghir_Scaffold1357G000040	Ghir_D08G018190		Ghir_D07G007570	Ghir_A08G000190			Ghir_D05G037480	Ghir_A11G023730		Ghir_D07G020410
	Ghir_A07G010310	Ghir_D07G024730		Ghir_Scaffold423G000160	Ghir_D08G018980		Ghir_D07G007720	Ghir_A08G000210			Ghir_D05G037760	Ghir_A11G023810		Ghir_D07G020740
	Ghir_A07G010400	Ghir_D07G025020			Ghir_D08G019050		Ghir_D07G008000	Ghir_A08G000340			Ghir_D05G038470	Ghir_A11G024340		Ghir_D07G021370
	Ghir_A07G010430	Ghir_D07G025140			Ghir_D08G019070		Ghir_D07G008120	Ghir_A08G000410			Ghir_D05G038870	Ghir_A11G024520		Ghir_D07G021460
	Ghir_A07G010630	Ghir_D07G025270			Ghir_D08G019980		Ghir_D07G008620	Ghir_A08G000580			Ghir_D05G039120	Ghir_A11G024590		Ghir_D07G021500
	Ghir_A07G010650	Ghir_D08G000170			Ghir_D08G020290		Ghir_D07G009350	Ghir_A08G000820			Ghir_D05G039690	Ghir_A11G024680		Ghir_D07G021530
	Ghir_A07G010720	Ghir_D08G000400			Ghir_D08G020560		Ghir_D07G009890	Ghir_A08G000940			Ghir_D05G039710	Ghir_A11G024700		Ghir_D07G021860
	Ghir_A07G011050	Ghir_D08G000550			Ghir_D08G020570		Ghir_D07G009970	Ghir_A08G001010			Ghir_D05G039860	Ghir_A11G024840		Ghir_D07G022610
	Ghir_A07G011200	Ghir_D08G001010			Ghir_D08G021420		Ghir_D07G010350	Ghir_A08G001030			Ghir_D06G000900	Ghir_A11G024990		Ghir_D07G023510
	Ghir_A07G011250	Ghir_D08G001870			Ghir_D08G021480		Ghir_D07G010520	Ghir_A08G001050			Ghir_D06G001400	Ghir_A11G025450		Ghir_D07G023530
	Ghir_A07G011350	Ghir_D08G001920			Ghir_D08G022330		Ghir_D07G011130	Ghir_A08G001270			Ghir_D06G001830	Ghir_A11G025800		Ghir_D07G023740
	Ghir_A07G011470	Ghir_D08G002560			Ghir_D08G023550		Ghir_D07G011320	Ghir_A08G001290			Ghir_D06G002210	Ghir_A11G025980		Ghir_D07G024040
	Ghir_A07G012120	Ghir_D08G002960			Ghir_D08G024880		Ghir_D07G011950	Ghir_A08G001590			Ghir_D06G002520	Ghir_A11G026200		Ghir_D07G024270
	Ghir_A07G012300	Ghir_D08G003010			Ghir_D08G024920		Ghir_D07G012430	Ghir_A08G001690			Ghir_D06G002760	Ghir_A11G026930		Ghir_D07G024340
	Ghir_A07G012360	Ghir_D08G003030			Ghir_D08G025070		Ghir_D07G012570	Ghir_A08G001730			Ghir_D06G003240	Ghir_A11G027080		Ghir_D07G024360
	Ghir_A07G012610	Ghir_D08G003300			Ghir_D08G025760		Ghir_D07G014600	Ghir_A08G001800			Ghir_D06G003790	Ghir_A11G027110		Ghir_D07G024480
	Ghir_A07G012650	Ghir_D08G003440			Ghir_D08G026550		Ghir_D07G015530	Ghir_A08G001890			Ghir_D06G004570	Ghir_A11G027200		Ghir_D07G024700
	Ghir_A07G012720	Ghir_D08G003510			Ghir_D08G026560		Ghir_D07G016310	Ghir_A08G001900			Ghir_D06G004950	Ghir_A11G027570		Ghir_D07G025020
	Ghir_A07G012770	Ghir_D08G003730			Ghir_D08G027000		Ghir_D07G016500	Ghir_A08G002160			Ghir_D06G005110	Ghir_A11G027630		Ghir_D08G000110
	Ghir_A07G013030	Ghir_D08G003840			Ghir_D08G027370		Ghir_D07G016540	Ghir_A08G002310			Ghir_D06G005190	Ghir_A11G027670		Ghir_D08G000450
	Ghir_A07G013110	Ghir_D08G003930			Ghir_D08G027700		Ghir_D07G016910	Ghir_A08G002320			Ghir_D06G005330	Ghir_A11G028330		Ghir_D08G000520
	Ghir_A07G013130	Ghir_D08G003950			Ghir_D08G027790		Ghir_D07G017460	Ghir_A08G002480			Ghir_D06G005570	Ghir_A11G028500		Ghir_D08G000700
	Ghir_A07G013250	Ghir_D08G004060			Ghir_D09G000900		Ghir_D07G019360	Ghir_A08G002760			Ghir_D06G006740	Ghir_A11G028660		Ghir_D08G000950
	Ghir_A07G013390	Ghir_D08G004620			Ghir_D09G001210		Ghir_D07G019800	Ghir_A08G002980			Ghir_D06G006820	Ghir_A11G028720		Ghir_D08G001070
	Ghir_A07G013540	Ghir_D08G004680			Ghir_D09G001990		Ghir_D07G020000	Ghir_A08G003050			Ghir_D06G006930	Ghir_A11G028740		Ghir_D08G001230
	Ghir_A07G013650	Ghir_D08G004700			Ghir_D09G002050		Ghir_D07G020080	Ghir_A08G003070			Ghir_D06G007100	Ghir_A11G028790		Ghir_D08G001870
	Ghir_A07G013760	Ghir_D08G004710			Ghir_D09G002150		Ghir_D07G020410	Ghir_A08G003170			Ghir_D06G007590	Ghir_A11G028800		Ghir_D08G001920
	Ghir_A07G013770	Ghir_D08G004830			Ghir_D09G002440		Ghir_D07G020740	Ghir_A08G003240			Ghir_D06G007730	Ghir_A11G028860		Ghir_D08G002420
	Ghir_A07G013830	Ghir_D08G005030			Ghir_D09G002490		Ghir_D07G021370	Ghir_A08G003260			Ghir_D06G007900	Ghir_A11G029380		Ghir_D08G002620
	Ghir_A07G013980	Ghir_D08G005460			Ghir_D09G002970		Ghir_D07G021530	Ghir_A08G003390			Ghir_D06G008010	Ghir_A11G029650		Ghir_D08G002630
	Ghir_A07G014090	Ghir_D08G005780			Ghir_D09G003430		Ghir_D07G022220	Ghir_A08G003520			Ghir_D06G008430	Ghir_A11G030280		Ghir_D08G003440
	Ghir_A07G014120	Ghir_D08G005960			Ghir_D09G003650		Ghir_D07G022370	Ghir_A08G003600			Ghir_D06G008950	Ghir_A11G030390		Ghir_D08G003510
	Ghir_A07G014380	Ghir_D08G006300			Ghir_D09G003830		Ghir_D07G022400	Ghir_A08G003700			Ghir_D06G009570	Ghir_A11G030420		Ghir_D08G003780
	Ghir_A07G014390	Ghir_D08G006930			Ghir_D09G004190		Ghir_D07G023530	Ghir_A08G003810			Ghir_D06G010460	Ghir_A11G030600		Ghir_D08G003800
	Ghir_A07G014440	Ghir_D08G007550			Ghir_D09G004320		Ghir_D07G023730	Ghir_A08G003840			Ghir_D06G010480	Ghir_A11G030670		Ghir_D08G004090
	Ghir_A07G014480	Ghir_D08G007660			Ghir_D09G005970		Ghir_D07G023740	Ghir_A08G003970			Ghir_D06G010760	Ghir_A11G030740		Ghir_D08G004620
	Ghir_A07G014520	Ghir_D08G007850			Ghir_D09G007380		Ghir_D07G024040	Ghir_A08G004070			Ghir_D06G011980	Ghir_A11G031080		Ghir_D08G004700
	Ghir_A07G014630	Ghir_D08G008570			Ghir_D09G007390		Ghir_D07G024340	Ghir_A08G004090			Ghir_D06G011990	Ghir_A11G031090		Ghir_D08G004710
	Ghir_A07G014830	Ghir_D08G008880			Ghir_D09G007420		Ghir_D07G024480	Ghir_A08G004130			Ghir_D06G012390	Ghir_A11G031390		Ghir_D08G005020
	Ghir_A07G014880	Ghir_D08G009830			Ghir_D09G007450		Ghir_D07G024680	Ghir_A08G004540			Ghir_D06G014230	Ghir_A11G031610		Ghir_D08G005030
	Ghir_A07G014890	Ghir_D08G011470			Ghir_D09G007510		Ghir_D07G025230	Ghir_A08G004810			Ghir_D06G014530	Ghir_A11G031850		Ghir_D08G005950
	Ghir_A07G014930	Ghir_D08G011690			Ghir_D09G008140		Ghir_D08G000110	Ghir_A08G004860			Ghir_D06G014790	Ghir_A11G032280		Ghir_D08G006080
	Ghir_A07G014960	Ghir_D08G011830			Ghir_D09G008260		Ghir_D08G000200	Ghir_A08G004930			Ghir_D06G015910	Ghir_A11G032890		Ghir_D08G006430
	Ghir_A07G015050	Ghir_D08G012920			Ghir_D09G008350		Ghir_D08G000450	Ghir_A08G004990			Ghir_D06G016150	Ghir_A11G032900		Ghir_D08G009400
	Ghir_A07G015070	Ghir_D08G012950			Ghir_D09G009030		Ghir_D08G000620	Ghir_A08G005140			Ghir_D06G016670	Ghir_A11G032930		Ghir_D08G010380
	Ghir_A07G015130	Ghir_D08G013020			Ghir_D09G009050		Ghir_D08G001060	Ghir_A08G005160			Ghir_D06G016770	Ghir_A11G033450		Ghir_D08G010690
	Ghir_A07G015220	Ghir_D08G013250			Ghir_D09G009090		Ghir_D08G001070	Ghir_A08G005360			Ghir_D06G016990	Ghir_A11G033580		Ghir_D08G011080
	Ghir_A07G015290	Ghir_D08G013950			Ghir_D09G009340		Ghir_D08G001130	Ghir_A08G005720			Ghir_D06G017330	Ghir_A11G034610		Ghir_D08G011830
	Ghir_A07G015660	Ghir_D08G014370			Ghir_D09G009870		Ghir_D08G001200	Ghir_A08G006190			Ghir_D06G017910	Ghir_A11G034980		Ghir_D08G012140
	Ghir_A07G015890	Ghir_D08G014940			Ghir_D09G010080		Ghir_D08G001220	Ghir_A08G006470			Ghir_D06G018470	Ghir_A11G035170		Ghir_D08G012290
	Ghir_A07G016020	Ghir_D08G015360			Ghir_D09G010720		Ghir_D08G001660	Ghir_A08G006500			Ghir_D06G019070	Ghir_A11G035890		Ghir_D08G012390
	Ghir_A07G016060	Ghir_D08G015410			Ghir_D09G010770		Ghir_D08G001720	Ghir_A08G006650			Ghir_D06G019150	Ghir_A12G000200		Ghir_D08G012400
	Ghir_A07G016090	Ghir_D08G015800			Ghir_D09G011420		Ghir_D08G001770	Ghir_A08G006950			Ghir_D06G019850	Ghir_A12G000470		Ghir_D08G013250
	Ghir_A07G016240	Ghir_D08G015870			Ghir_D09G012080		Ghir_D08G001910	Ghir_A08G007110			Ghir_D06G020310	Ghir_A12G000600		Ghir_D08G013340
	Ghir_A07G016250	Ghir_D08G016730			Ghir_D09G012930		Ghir_D08G002420	Ghir_A08G007250			Ghir_D06G020580	Ghir_A12G000830		Ghir_D08G013380
	Ghir_A07G016270	Ghir_D08G016970			Ghir_D09G013090		Ghir_D08G002460	Ghir_A08G007310			Ghir_D06G020640	Ghir_A12G000990		Ghir_D08G015410
	Ghir_A07G016360	Ghir_D08G017050			Ghir_D09G013380		Ghir_D08G002620	Ghir_A08G007320			Ghir_D06G020790	Ghir_A12G001330		Ghir_D08G015510
	Ghir_A07G016520	Ghir_D08G017120			Ghir_D09G014630		Ghir_D08G003090	Ghir_A08G007340			Ghir_D06G020830	Ghir_A12G001350		Ghir_D08G015700
	Ghir_A07G016540	Ghir_D08G017130			Ghir_D09G014980		Ghir_D08G003770	Ghir_A08G007450			Ghir_D06G021390	Ghir_A12G001430		Ghir_D08G015710
	Ghir_A07G016570	Ghir_D08G017400			Ghir_D09G015460		Ghir_D08G003780	Ghir_A08G007500			Ghir_D06G021550	Ghir_A12G002040		Ghir_D08G017150
	Ghir_A07G016620	Ghir_D08G018020			Ghir_D09G015590		Ghir_D08G004090	Ghir_A08G007580			Ghir_D06G021590	Ghir_A12G002140		Ghir_D08G017310
	Ghir_A07G016640	Ghir_D08G018270			Ghir_D09G015700		Ghir_D08G004120	Ghir_A08G007640			Ghir_D06G021760	Ghir_A12G002210		Ghir_D08G017860
	Ghir_A07G016710	Ghir_D08G018490			Ghir_D09G016080		Ghir_D08G004820	Ghir_A08G007680			Ghir_D06G021980	Ghir_A12G002270		Ghir_D08G017940
	Ghir_A07G016770	Ghir_D08G019590			Ghir_D09G016120		Ghir_D08G004840	Ghir_A08G008080			Ghir_D06G022110	Ghir_A12G002830		Ghir_D08G017950
	Ghir_A07G017070	Ghir_D08G019700			Ghir_D09G016780		Ghir_D08G005580	Ghir_A08G008240			Ghir_D06G022150	Ghir_A12G002860		Ghir_D08G018000
	Ghir_A07G017410	Ghir_D08G019800			Ghir_D09G017420		Ghir_D08G006240	Ghir_A08G008260			Ghir_D06G022310	Ghir_A12G003090		Ghir_D08G018130
	Ghir_A07G017550	Ghir_D08G019960			Ghir_D09G017850		Ghir_D08G006280	Ghir_A08G008390			Ghir_D06G022380	Ghir_A12G003130		Ghir_D08G018730
	Ghir_A07G017650	Ghir_D08G020100			Ghir_D09G018080		Ghir_D08G006420	Ghir_A08G008510			Ghir_D06G022520	Ghir_A12G003320		Ghir_D08G019230
	Ghir_A07G017700	Ghir_D08G020490			Ghir_D09G018630		Ghir_D08G008140	Ghir_A08G008820			Ghir_D06G023620	Ghir_A12G003800		Ghir_D08G019450
	Ghir_A07G017730	Ghir_D08G020580			Ghir_D09G019060		Ghir_D08G008320	Ghir_A08G008910			Ghir_D06G023640	Ghir_A12G003910		Ghir_D08G019530
	Ghir_A07G017860	Ghir_D08G020990			Ghir_D09G019100		Ghir_D08G009510	Ghir_A08G009650			Ghir_D07G000440	Ghir_A12G004260		Ghir_D08G020060
	Ghir_A07G018220	Ghir_D08G021200			Ghir_D09G019390		Ghir_D08G009620	Ghir_A08G010090			Ghir_D07G000640	Ghir_A12G004280		Ghir_D08G020300
	Ghir_A07G018280	Ghir_D08G021280			Ghir_D09G020250		Ghir_D08G010020	Ghir_A08G010140			Ghir_D07G001010	Ghir_A12G004480		Ghir_D08G020580
	Ghir_A07G018290	Ghir_D08G021510			Ghir_D09G020460		Ghir_D08G010210	Ghir_A08G010250			Ghir_D07G001360	Ghir_A12G004540		Ghir_D08G021570
	Ghir_A07G018520	Ghir_D08G021520			Ghir_D09G021670		Ghir_D08G010380	Ghir_A08G010300			Ghir_D07G001510	Ghir_A12G004580		Ghir_D08G021940
	Ghir_A07G018620	Ghir_D08G021600			Ghir_D09G021860		Ghir_D08G010690	Ghir_A08G010400			Ghir_D07G001610	Ghir_A12G004890		Ghir_D08G022660
	Ghir_A07G018870	Ghir_D08G021650			Ghir_D09G022470		Ghir_D08G011080	Ghir_A08G010420			Ghir_D07G001710	Ghir_A12G004990		Ghir_D08G022750
	Ghir_A07G019370	Ghir_D08G021770			Ghir_D09G022610		Ghir_D08G011100	Ghir_A08G010630			Ghir_D07G001880	Ghir_A12G005180		Ghir_D08G023110
	Ghir_A07G019500	Ghir_D08G021860			Ghir_D09G022620		Ghir_D08G011820	Ghir_A08G010860			Ghir_D07G002720	Ghir_A12G005460		Ghir_D08G024140
	Ghir_A07G019860	Ghir_D08G022030			Ghir_D09G022910		Ghir_D08G012140	Ghir_A08G010910			Ghir_D07G002920	Ghir_A12G005510		Ghir_D08G024150
	Ghir_A07G019920	Ghir_D08G022300			Ghir_D09G023160		Ghir_D08G012390	Ghir_A08G010990			Ghir_D07G002930	Ghir_A12G006060		Ghir_D08G024960
	Ghir_A07G020180	Ghir_D08G022490			Ghir_D09G023480		Ghir_D08G013010	Ghir_A08G011040			Ghir_D07G003410	Ghir_A12G006850		Ghir_D08G025950
	Ghir_A07G020220	Ghir_D08G022750			Ghir_D09G024040		Ghir_D08G013060	Ghir_A08G011220			Ghir_D07G003520	Ghir_A12G007160		Ghir_D08G025970
	Ghir_A07G020300	Ghir_D08G024770			Ghir_D09G024050		Ghir_D08G013380	Ghir_A08G011630			Ghir_D07G005660	Ghir_A12G007440		Ghir_D08G026120
	Ghir_A07G020540	Ghir_D08G025570			Ghir_D09G024100		Ghir_D08G013460	Ghir_A08G011830			Ghir_D07G006250	Ghir_A12G007620		Ghir_D08G026300
	Ghir_A07G020560	Ghir_D08G025580			Ghir_D09G025070		Ghir_D08G013480	Ghir_A08G011850			Ghir_D07G006400	Ghir_A12G007920		Ghir_D08G026980
	Ghir_A07G021190	Ghir_D08G025970			Ghir_D09G025670		Ghir_D08G013650	Ghir_A08G011930			Ghir_D07G006410	Ghir_A12G007930		Ghir_D08G027030
	Ghir_A07G021450	Ghir_D08G026800			Ghir_D09G025740		Ghir_D08G014310	Ghir_A08G011940			Ghir_D07G006510	Ghir_A12G008340		Ghir_D08G027080
	Ghir_A07G021460	Ghir_D08G026970			Ghir_D09G025770		Ghir_D08G015520	Ghir_A08G012070			Ghir_D07G006520	Ghir_A12G008440		Ghir_D08G027310
	Ghir_A07G021470	Ghir_D08G027310			Ghir_D10G000270		Ghir_D08G015710	Ghir_A08G012490			Ghir_D07G006600	Ghir_A12G008450		Ghir_D08G027410
	Ghir_A07G021500	Ghir_D08G027410			Ghir_D10G000350		Ghir_D08G016780	Ghir_A08G012680			Ghir_D07G006750	Ghir_A12G008590		Ghir_D08G027570
	Ghir_A07G021540	Ghir_D08G027500			Ghir_D10G001100		Ghir_D08G017150	Ghir_A08G012820			Ghir_D07G007090	Ghir_A12G008670		Ghir_D08G027960
	Ghir_A07G021610	Ghir_D08G028020			Ghir_D10G001460		Ghir_D08G017300	Ghir_A08G013000			Ghir_D07G007310	Ghir_A12G008760		Ghir_D09G000700
	Ghir_A07G021630	Ghir_D09G000460			Ghir_D10G001780		Ghir_D08G017310	Ghir_A08G013280			Ghir_D07G007600	Ghir_A12G009210		Ghir_D09G001320
	Ghir_A07G021670	Ghir_D09G001870			Ghir_D10G001810		Ghir_D08G017320	Ghir_A08G013400			Ghir_D07G008110	Ghir_A12G009450		Ghir_D09G001610
	Ghir_A07G021690	Ghir_D09G002060			Ghir_D10G002400		Ghir_D08G017940	Ghir_A08G013630			Ghir_D07G008120	Ghir_A12G009630		Ghir_D09G002820
	Ghir_A07G021800	Ghir_D09G002160			Ghir_D10G002460		Ghir_D08G017950	Ghir_A08G013670			Ghir_D07G009080	Ghir_A12G010640		Ghir_D09G002880
	Ghir_A07G022060	Ghir_D09G002580			Ghir_D10G002890		Ghir_D08G018130	Ghir_A08G014130			Ghir_D07G009500	Ghir_A12G010970		Ghir_D09G003070
	Ghir_A07G022210	Ghir_D09G002820			Ghir_D10G003040		Ghir_D08G018150	Ghir_A08G014210			Ghir_D07G009720	Ghir_A12G011410		Ghir_D09G003210
	Ghir_A07G022320	Ghir_D09G002880			Ghir_D10G003210		Ghir_D08G018610	Ghir_A08G014280			Ghir_D07G010350	Ghir_A12G011570		Ghir_D09G003420
	Ghir_A07G022410	Ghir_D09G003400			Ghir_D10G003930		Ghir_D08G019230	Ghir_A08G014800			Ghir_D07G010450	Ghir_A12G011730		Ghir_D09G004460
	Ghir_A07G022450	Ghir_D09G003780			Ghir_D10G004040		Ghir_D08G019380	Ghir_A08G015130			Ghir_D07G010520	Ghir_A12G011780		Ghir_D09G004840
	Ghir_A07G022530	Ghir_D09G004530			Ghir_D10G004470		Ghir_D08G019450	Ghir_A08G015200			Ghir_D07G010580	Ghir_A12G011820		Ghir_D09G005950
	Ghir_A07G022630	Ghir_D09G004790			Ghir_D10G005380		Ghir_D08G020060	Ghir_A08G015230			Ghir_D07G010620	Ghir_A12G012210		Ghir_D09G006230
	Ghir_A07G022800	Ghir_D09G005870			Ghir_D10G005550		Ghir_D08G020300	Ghir_A08G015380			Ghir_D07G011130	Ghir_A12G012350		Ghir_D09G006240
	Ghir_A07G022970	Ghir_D09G006230			Ghir_D10G005860		Ghir_D08G020330	Ghir_A08G015820			Ghir_D07G011890	Ghir_A12G012410		Ghir_D09G007650
	Ghir_A07G023040	Ghir_D09G007500			Ghir_D10G005880		Ghir_D08G020890	Ghir_A08G015830			Ghir_D07G012880	Ghir_A12G012790		Ghir_D09G007930
	Ghir_A07G023070	Ghir_D09G007700			Ghir_D10G006350		Ghir_D08G020920	Ghir_A08G015930			Ghir_D07G013120	Ghir_A12G013050		Ghir_D09G008680
	Ghir_A07G023100	Ghir_D09G009380			Ghir_D10G006470		Ghir_D08G021380	Ghir_A08G016150			Ghir_D07G013280	Ghir_A12G013270		Ghir_D09G008710
	Ghir_A07G023150	Ghir_D09G009930			Ghir_D10G006590		Ghir_D08G022070	Ghir_A08G016190			Ghir_D07G013760	Ghir_A12G013850		Ghir_D09G008940
	Ghir_A07G023170	Ghir_D09G009970			Ghir_D10G007090		Ghir_D08G022390	Ghir_A08G016220			Ghir_D07G014770	Ghir_A12G014020		Ghir_D09G009930
	Ghir_A07G023480	Ghir_D09G010280			Ghir_D10G007410		Ghir_D08G022400	Ghir_A08G016560			Ghir_D07G015530	Ghir_A12G014100		Ghir_D09G010060
	Ghir_A07G023500	Ghir_D09G010400			Ghir_D10G008240		Ghir_D08G023110	Ghir_A08G016800			Ghir_D07G016210	Ghir_A12G014470		Ghir_D09G010330
	Ghir_A07G023620	Ghir_D09G010900			Ghir_D10G010230		Ghir_D08G023900	Ghir_A08G017260			Ghir_D07G017860	Ghir_A12G015280		Ghir_D09G011260
	Ghir_A07G023880	Ghir_D09G011120			Ghir_D10G010270		Ghir_D08G024140	Ghir_A08G017310			Ghir_D07G018380	Ghir_A12G016050		Ghir_D09G011430
	Ghir_A07G024120	Ghir_D09G011430			Ghir_D10G010400		Ghir_D08G024150	Ghir_A08G017400			Ghir_D07G018740	Ghir_A12G016070		Ghir_D09G011560
	Ghir_A07G024320	Ghir_D09G012180			Ghir_D10G010540		Ghir_D08G024840	Ghir_A08G017530			Ghir_D07G019360	Ghir_A12G016420		Ghir_D09G012100
	Ghir_A07G024380	Ghir_D09G012430			Ghir_D10G010680		Ghir_D08G024960	Ghir_A08G017600			Ghir_D07G019750	Ghir_A12G016570		Ghir_D09G012330
	Ghir_A07G024420	Ghir_D09G012490			Ghir_D10G010730		Ghir_D08G025140	Ghir_A08G017800			Ghir_D07G020080	Ghir_A12G016650		Ghir_D09G012470
	Ghir_A07G024530	Ghir_D09G012850			Ghir_D10G011740		Ghir_D08G025790	Ghir_A08G017930			Ghir_D07G020290	Ghir_A12G016680		Ghir_D09G012540
	Ghir_A07G024850	Ghir_D09G013550			Ghir_D10G012230		Ghir_D08G026120	Ghir_A08G018140			Ghir_D07G021670	Ghir_A12G016800		Ghir_D09G012900
	Ghir_A07G025000	Ghir_D09G013860			Ghir_D10G012960		Ghir_D08G026200	Ghir_A08G018180			Ghir_D07G021780	Ghir_A12G017090		Ghir_D09G013440
	Ghir_A07G025030	Ghir_D09G014930			Ghir_D10G014320		Ghir_D08G026480	Ghir_A08G018220			Ghir_D07G022030	Ghir_A12G017410		Ghir_D09G013500
	Ghir_A07G025210	Ghir_D09G015490			Ghir_D10G015260		Ghir_D08G026980	Ghir_A08G018260			Ghir_D07G022400	Ghir_A12G017510		Ghir_D09G013710
	Ghir_A08G000160	Ghir_D09G015850			Ghir_D10G016330		Ghir_D08G027010	Ghir_A08G018310			Ghir_D07G023280	Ghir_A12G017520		Ghir_D09G013860
	Ghir_A08G000190	Ghir_D09G016050			Ghir_D10G016640		Ghir_D08G027030	Ghir_A08G018430			Ghir_D07G023520	Ghir_A12G017820		Ghir_D09G014800
	Ghir_A08G000210	Ghir_D09G016170			Ghir_D10G016750		Ghir_D08G027300	Ghir_A08G018850			Ghir_D07G023730	Ghir_A12G018000		Ghir_D09G015810
	Ghir_A08G000340	Ghir_D09G016500			Ghir_D10G016850		Ghir_D08G027400	Ghir_A08G019030			Ghir_D07G023790	Ghir_A12G018060		Ghir_D09G015870
	Ghir_A08G000370	Ghir_D09G016580			Ghir_D10G017560		Ghir_D08G027510	Ghir_A08G019110			Ghir_D07G024570	Ghir_A12G018100		Ghir_D09G016110
	Ghir_A08G000410	Ghir_D09G017060			Ghir_D10G017680		Ghir_D08G027570	Ghir_A08G019270			Ghir_D07G025040	Ghir_A12G018360		Ghir_D09G016500
	Ghir_A08G000580	Ghir_D09G018000			Ghir_D10G017760		Ghir_D08G027590	Ghir_A08G019300			Ghir_D08G000200	Ghir_A12G018460		Ghir_D09G016710
	Ghir_A08G000820	Ghir_D09G018150			Ghir_D10G018130		Ghir_D09G001320	Ghir_A08G019430			Ghir_D08G000620	Ghir_A12G018700		Ghir_D09G016830
	Ghir_A08G000920	Ghir_D09G018160			Ghir_D10G018250		Ghir_D09G001610	Ghir_A08G019500			Ghir_D08G001060	Ghir_A12G018990		Ghir_D09G016980
	Ghir_A08G000940	Ghir_D09G018590			Ghir_D10G018320		Ghir_D09G002630	Ghir_A08G019540			Ghir_D08G001130	Ghir_A12G019320		Ghir_D09G017060
	Ghir_A08G000960	Ghir_D09G018620			Ghir_D10G018510		Ghir_D09G003210	Ghir_A08G020090			Ghir_D08G001220	Ghir_A12G019510		Ghir_D09G017330
	Ghir_A08G001010	Ghir_D09G018650			Ghir_D10G018940		Ghir_D09G003230	Ghir_A08G020270			Ghir_D08G001720	Ghir_A12G019830		Ghir_D09G018000
	Ghir_A08G001030	Ghir_D09G019040			Ghir_D10G019490		Ghir_D09G003480	Ghir_A08G020350			Ghir_D08G001770	Ghir_A12G020240		Ghir_D09G018150
	Ghir_A08G001290	Ghir_D09G019240			Ghir_D10G019820		Ghir_D09G003580	Ghir_A08G020430			Ghir_D08G002460	Ghir_A12G020950		Ghir_D09G018620
	Ghir_A08G001590	Ghir_D09G019640			Ghir_D10G020670		Ghir_D09G004840	Ghir_A08G021110			Ghir_D08G002670	Ghir_A12G021180		Ghir_D09G018650
	Ghir_A08G001680	Ghir_D09G020050			Ghir_D10G020820		Ghir_D09G005950	Ghir_A08G021210			Ghir_D08G003090	Ghir_A12G021220		Ghir_D09G018690
	Ghir_A08G001690	Ghir_D09G020280			Ghir_D10G021230		Ghir_D09G006240	Ghir_A08G021600			Ghir_D08G003770	Ghir_A12G021230		Ghir_D09G019210
	Ghir_A08G001730	Ghir_D09G020500			Ghir_D10G021890		Ghir_D09G007650	Ghir_A08G021730			Ghir_D08G004840	Ghir_A12G021240		Ghir_D09G019240
	Ghir_A08G001790	Ghir_D09G020570			Ghir_D10G023070		Ghir_D09G008630	Ghir_A08G021990			Ghir_D08G005180	Ghir_A12G021500		Ghir_D09G019920
	Ghir_A08G001800	Ghir_D09G020580			Ghir_D10G023280		Ghir_D09G008680	Ghir_A08G022050			Ghir_D08G005410	Ghir_A12G021560		Ghir_D09G020030
	Ghir_A08G001890	Ghir_D09G020630			Ghir_D10G023860		Ghir_D09G008710	Ghir_A08G022200			Ghir_D08G005580	Ghir_A12G021990		Ghir_D09G020280
	Ghir_A08G001900	Ghir_D09G020770			Ghir_D10G024980		Ghir_D09G008740	Ghir_A08G022420			Ghir_D08G005780	Ghir_A12G022140		Ghir_D09G020300
	Ghir_A08G002160	Ghir_D09G020780			Ghir_D10G025110		Ghir_D09G008940	Ghir_A08G022470			Ghir_D08G005900	Ghir_A12G022260		Ghir_D09G020530
	Ghir_A08G002280	Ghir_D09G021110			Ghir_D10G025150		Ghir_D09G008960	Ghir_A08G022480			Ghir_D08G006420	Ghir_A12G022650		Ghir_D09G020770
	Ghir_A08G002480	Ghir_D09G021750			Ghir_D10G025200		Ghir_D09G009950	Ghir_A08G022880			Ghir_D08G007950	Ghir_A12G022750		Ghir_D09G021050
	Ghir_A08G002760	Ghir_D09G021840			Ghir_D10G025850		Ghir_D09G010060	Ghir_A08G022900			Ghir_D08G008570	Ghir_A12G022790		Ghir_D09G021750
	Ghir_A08G002890	Ghir_D09G021890			Ghir_D10G026340		Ghir_D09G010360	Ghir_A08G022910			Ghir_D08G008940	Ghir_A12G023150		Ghir_D09G021770
	Ghir_A08G002980	Ghir_D09G022410			Ghir_D10G026780		Ghir_D09G010660	Ghir_A08G023120			Ghir_D08G009510	Ghir_A12G023760		Ghir_D09G022090
	Ghir_A08G003170	Ghir_D09G022600			Ghir_D10G027010		Ghir_D09G010780	Ghir_A08G023550			Ghir_D08G009620	Ghir_A12G023920		Ghir_D09G022410
	Ghir_A08G003240	Ghir_D09G022630			Ghir_D10G027660		Ghir_D09G011010	Ghir_A08G023620			Ghir_D08G009830	Ghir_A12G024090		Ghir_D09G022590
	Ghir_A08G003260	Ghir_D09G022880			Ghir_D10G027700		Ghir_D09G011070	Ghir_A08G023670			Ghir_D08G010020	Ghir_A12G024400		Ghir_D09G022830
	Ghir_A08G003520	Ghir_D09G022920			Ghir_D11G001470		Ghir_D09G011260	Ghir_A08G023990			Ghir_D08G011100	Ghir_A12G024720		Ghir_D09G023380
	Ghir_A08G003600	Ghir_D09G023300			Ghir_D11G001820		Ghir_D09G012100	Ghir_A08G024070			Ghir_D08G011420	Ghir_A12G024800		Ghir_D09G023470
	Ghir_A08G003700	Ghir_D09G023470			Ghir_D11G002080		Ghir_D09G012200	Ghir_A08G024170			Ghir_D08G011690	Ghir_A12G024840		Ghir_D09G024070
	Ghir_A08G003810	Ghir_D09G023680			Ghir_D11G002110		Ghir_D09G012540	Ghir_A08G024350			Ghir_D08G011810	Ghir_A12G024860		Ghir_D09G024150
	Ghir_A08G003970	Ghir_D09G023930			Ghir_D11G002340		Ghir_D09G012900	Ghir_A08G024460			Ghir_D08G012000	Ghir_A12G024990		Ghir_D09G024670
	Ghir_A08G004070	Ghir_D09G023950			Ghir_D11G002550		Ghir_D09G013020	Ghir_A08G024710			Ghir_D08G013010	Ghir_A12G025060		Ghir_D09G024960
	Ghir_A08G004130	Ghir_D09G024170			Ghir_D11G002960		Ghir_D09G013170	Ghir_A08G024720			Ghir_D08G013040	Ghir_A12G025860		Ghir_D09G025610
	Ghir_A08G004630	Ghir_D09G024340			Ghir_D11G003510		Ghir_D09G013500	Ghir_A08G024910			Ghir_D08G016620	Ghir_A12G025870		Ghir_D10G000220
	Ghir_A08G004760	Ghir_D10G000080			Ghir_D11G003650		Ghir_D09G013710	Ghir_A08G024940			Ghir_D08G017130	Ghir_A12G026130		Ghir_D10G000280
	Ghir_A08G004810	Ghir_D10G000180			Ghir_D11G003930		Ghir_D09G014890	Ghir_A08G025000			Ghir_D08G018150	Ghir_A12G026290		Ghir_D10G000620
	Ghir_A08G004990	Ghir_D10G000310			Ghir_D11G003940		Ghir_D09G014950	Ghir_A08G025100			Ghir_D08G019700	Ghir_A12G026470		Ghir_D10G001130
	Ghir_A08G005150	Ghir_D10G000450			Ghir_D11G004240		Ghir_D09G015670	Ghir_A08G025120			Ghir_D08G020330	Ghir_A12G027640		Ghir_D10G001510
	Ghir_A08G005360	Ghir_D10G000620			Ghir_D11G004450		Ghir_D09G015870	Ghir_A08G025130			Ghir_D08G020490	Ghir_A12G027730		Ghir_D10G003400
	Ghir_A08G005570	Ghir_D10G001130			Ghir_D11G004570		Ghir_D09G016100	Ghir_A08G025160			Ghir_D08G020890	Ghir_A12G027850		Ghir_D10G003770
	Ghir_A08G005720	Ghir_D10G001230			Ghir_D11G005090		Ghir_D09G016110	Ghir_A08G025300			Ghir_D08G020920	Ghir_A12G027860		Ghir_D10G003940
	Ghir_A08G006150	Ghir_D10G001340			Ghir_D11G005250		Ghir_D09G016710	Ghir_A08G025670			Ghir_D08G021200	Ghir_A12G028100		Ghir_D10G004520
	Ghir_A08G006190	Ghir_D10G001360			Ghir_D11G005630		Ghir_D09G017330	Ghir_A08G025710			Ghir_D08G021770	Ghir_A12G028590		Ghir_D10G005610
	Ghir_A08G006410	Ghir_D10G001670			Ghir_D11G005770		Ghir_D09G018570	Ghir_A08G025730			Ghir_D08G022070	Ghir_A12G028880		Ghir_D10G006110
	Ghir_A08G006470	Ghir_D10G001730			Ghir_D11G005780		Ghir_D09G018840	Ghir_A08G025820			Ghir_D08G022100	Ghir_A12G029090		Ghir_D10G006480
	Ghir_A08G006500	Ghir_D10G002880			Ghir_D11G005930		Ghir_D09G018970	Ghir_A08G025960			Ghir_D08G022180	Ghir_A13G000120		Ghir_D10G006560
	Ghir_A08G006650	Ghir_D10G003240			Ghir_D11G007370		Ghir_D09G019210	Ghir_A08G026120			Ghir_D08G022390	Ghir_A13G000440		Ghir_D10G006780
	Ghir_A08G006660	Ghir_D10G003380			Ghir_D11G008170		Ghir_D09G019790	Ghir_A08G026130			Ghir_D08G023500	Ghir_A13G000570		Ghir_D10G007490
	Ghir_A08G006820	Ghir_D10G003400			Ghir_D11G008280		Ghir_D09G020030	Ghir_A08G026170			Ghir_D08G023900	Ghir_A13G001040		Ghir_D10G008720
	Ghir_A08G006920	Ghir_D10G003710			Ghir_D11G008300		Ghir_D09G020040	Ghir_A08G026710			Ghir_D08G024410	Ghir_A13G001120		Ghir_D10G010700
	Ghir_A08G007110	Ghir_D10G003770			Ghir_D11G008380		Ghir_D09G020140	Ghir_A09G000070			Ghir_D08G024720	Ghir_A13G001190		Ghir_D10G011350
	Ghir_A08G007270	Ghir_D10G004060			Ghir_D11G008610		Ghir_D09G020300	Ghir_A09G000140			Ghir_D08G025100	Ghir_A13G001390		Ghir_D10G012060
	Ghir_A08G007280	Ghir_D10G004800			Ghir_D11G008740		Ghir_D09G020440	Ghir_A09G000280			Ghir_D08G025140	Ghir_A13G001920		Ghir_D10G012070
	Ghir_A08G007320	Ghir_D10G004820			Ghir_D11G009070		Ghir_D09G020530	Ghir_A09G000460			Ghir_D08G025470	Ghir_A13G001930		Ghir_D10G012330
	Ghir_A08G007340	Ghir_D10G005090			Ghir_D11G009280		Ghir_D09G020720	Ghir_A09G000650			Ghir_D08G025580	Ghir_A13G001980		Ghir_D10G012350
	Ghir_A08G007450	Ghir_D10G005100			Ghir_D11G009510		Ghir_D09G021050	Ghir_A09G000680			Ghir_D08G025790	Ghir_A13G002010		Ghir_D10G012380
	Ghir_A08G007580	Ghir_D10G005180			Ghir_D11G009690		Ghir_D09G021170	Ghir_A09G000850			Ghir_D08G026330	Ghir_A13G002310		Ghir_D10G014090
	Ghir_A08G007640	Ghir_D10G005590			Ghir_D11G009710		Ghir_D09G021210	Ghir_A09G000890			Ghir_D08G026480	Ghir_A13G002470		Ghir_D10G014360
	Ghir_A08G007680	Ghir_D10G005840			Ghir_D11G010110		Ghir_D09G021770	Ghir_A09G000970			Ghir_D08G026800	Ghir_A13G002710		Ghir_D10G015250
	Ghir_A08G008260	Ghir_D10G006560			Ghir_D11G010470		Ghir_D09G022090	Ghir_A09G001050			Ghir_D08G027210	Ghir_A13G002720		Ghir_D10G015310
	Ghir_A08G008310	Ghir_D10G007130			Ghir_D11G010930		Ghir_D09G022590	Ghir_A09G001140			Ghir_D08G027260	Ghir_A13G003120		Ghir_D10G015560
	Ghir_A08G008390	Ghir_D10G007850			Ghir_D11G011040		Ghir_D09G022640	Ghir_A09G001160			Ghir_D08G027390	Ghir_A13G003340		Ghir_D10G015570
	Ghir_A08G008510	Ghir_D10G009310			Ghir_D11G011060		Ghir_D09G022760	Ghir_A09G001450			Ghir_D08G027400	Ghir_A13G003360		Ghir_D10G015750
	Ghir_A08G008770	Ghir_D10G009510			Ghir_D11G011960		Ghir_D09G022830	Ghir_A09G001650			Ghir_D08G027510	Ghir_A13G003450		Ghir_D10G017050
	Ghir_A08G008820	Ghir_D10G009550			Ghir_D11G012200		Ghir_D09G023380	Ghir_A09G001740			Ghir_D08G027590	Ghir_A13G003460		Ghir_D10G017450
	Ghir_A08G008910	Ghir_D10G010700			Ghir_D11G013110		Ghir_D09G023430	Ghir_A09G002050			Ghir_D08G027950	Ghir_A13G003580		Ghir_D10G017470
	Ghir_A08G009130	Ghir_D10G011050			Ghir_D11G013220		Ghir_D09G023490	Ghir_A09G002070			Ghir_D09G000250	Ghir_A13G003680		Ghir_D10G017510
	Ghir_A08G009650	Ghir_D10G011180			Ghir_D11G014680		Ghir_D09G023620	Ghir_A09G002470			Ghir_D09G000460	Ghir_A13G003870		Ghir_D10G017820
	Ghir_A08G009670	Ghir_D10G011380			Ghir_D11G015050		Ghir_D09G023880	Ghir_A09G002580			Ghir_D09G001020	Ghir_A13G003970		Ghir_D10G017900
	Ghir_A08G009700	Ghir_D10G012480			Ghir_D11G015410		Ghir_D09G023890	Ghir_A09G002590			Ghir_D09G002220	Ghir_A13G004100		Ghir_D10G017910
	Ghir_A08G009770	Ghir_D10G013650			Ghir_D11G015700		Ghir_D09G024150	Ghir_A09G002890			Ghir_D09G002290	Ghir_A13G004200		Ghir_D10G017950
	Ghir_A08G009930	Ghir_D10G013670			Ghir_D11G016370		Ghir_D09G024200	Ghir_A09G003030			Ghir_D09G002630	Ghir_A13G004240		Ghir_D10G018910
	Ghir_A08G010090	Ghir_D10G014180			Ghir_D11G016520		Ghir_D09G024240	Ghir_A09G003110			Ghir_D09G003480	Ghir_A13G004300		Ghir_D10G018970
	Ghir_A08G010300	Ghir_D10G015310			Ghir_D11G016550		Ghir_D09G024670	Ghir_A09G003150			Ghir_D09G003750	Ghir_A13G004750		Ghir_D10G018980
	Ghir_A08G010400	Ghir_D10G015350			Ghir_D11G016560		Ghir_D09G024910	Ghir_A09G003260			Ghir_D09G004480	Ghir_A13G004920		Ghir_D10G019310
	Ghir_A08G010420	Ghir_D10G015560			Ghir_D11G016730		Ghir_D09G024960	Ghir_A09G003360			Ghir_D09G004530	Ghir_A13G005200		Ghir_D10G019720
	Ghir_A08G010630	Ghir_D10G016730			Ghir_D11G016770		Ghir_D09G025250	Ghir_A09G003640			Ghir_D09G005610	Ghir_A13G005230		Ghir_D10G019750
	Ghir_A08G010860	Ghir_D10G016830			Ghir_D11G017540		Ghir_D10G000440	Ghir_A09G003910			Ghir_D09G005640	Ghir_A13G005260		Ghir_D10G021160
	Ghir_A08G010910	Ghir_D10G017530			Ghir_D11G017650		Ghir_D10G000650	Ghir_A09G003960			Ghir_D09G005890	Ghir_A13G005320		Ghir_D10G021360
	Ghir_A08G011040	Ghir_D10G017790			Ghir_D11G017840		Ghir_D10G001160	Ghir_A09G004240			Ghir_D09G006430	Ghir_A13G005380		Ghir_D10G021750
	Ghir_A08G011630	Ghir_D10G017820			Ghir_D11G018400		Ghir_D10G001510	Ghir_A09G004290			Ghir_D09G008470	Ghir_A13G005930		Ghir_D10G022170
	Ghir_A08G012070	Ghir_D10G017870			Ghir_D11G018680		Ghir_D10G002920	Ghir_A09G004510			Ghir_D09G008480	Ghir_A13G006350		Ghir_D10G022410
	Ghir_A08G012110	Ghir_D10G018160			Ghir_D11G018790		Ghir_D10G003010	Ghir_A09G004540			Ghir_D09G008520	Ghir_A13G006510		Ghir_D10G022620
	Ghir_A08G012300	Ghir_D10G019280			Ghir_D11G018850		Ghir_D10G003370	Ghir_A09G004660			Ghir_D09G008610	Ghir_A13G006710		Ghir_D10G023580
	Ghir_A08G012310	Ghir_D10G020340			Ghir_D11G019200		Ghir_D10G003790	Ghir_A09G004840			Ghir_D09G008740	Ghir_A13G006870		Ghir_D10G024140
	Ghir_A08G012580	Ghir_D10G020570			Ghir_D11G019520		Ghir_D10G003820	Ghir_A09G004850			Ghir_D09G008820	Ghir_A13G007000		Ghir_D10G025220
	Ghir_A08G012680	Ghir_D10G021140			Ghir_D11G019900		Ghir_D10G003940	Ghir_A09G005030			Ghir_D09G009770	Ghir_A13G007030		Ghir_D10G025880
	Ghir_A08G012840	Ghir_D10G021750			Ghir_D11G020140		Ghir_D10G004520	Ghir_A09G005050			Ghir_D09G009820	Ghir_A13G007320		Ghir_D10G026210
	Ghir_A08G012860	Ghir_D10G021770			Ghir_D11G020890		Ghir_D10G004530	Ghir_A09G005130			Ghir_D09G009950	Ghir_A13G007580		Ghir_D10G026720
	Ghir_A08G012880	Ghir_D10G022170			Ghir_D11G021140		Ghir_D10G004570	Ghir_A09G005150			Ghir_D09G009970	Ghir_A13G007640		Ghir_D10G027680
	Ghir_A08G012890	Ghir_D10G024470			Ghir_D11G021570		Ghir_D10G004720	Ghir_A09G005160			Ghir_D09G010280	Ghir_A13G007720		Ghir_D11G000310
	Ghir_A08G013000	Ghir_D10G024610			Ghir_D11G021730		Ghir_D10G005450	Ghir_A09G005220			Ghir_D09G010360	Ghir_A13G008160		Ghir_D11G001210
	Ghir_A08G013280	Ghir_D10G025040			Ghir_D11G022580		Ghir_D10G005610	Ghir_A09G005370			Ghir_D09G010400	Ghir_A13G008190		Ghir_D11G001340
	Ghir_A08G013450	Ghir_D10G026210			Ghir_D11G022740		Ghir_D10G005910	Ghir_A09G005880			Ghir_D09G010760	Ghir_A13G008200		Ghir_D11G001400
	Ghir_A08G013630	Ghir_D11G000310			Ghir_D11G023230		Ghir_D10G006280	Ghir_A09G005970			Ghir_D09G011180	Ghir_A13G008490		Ghir_D11G001800
	Ghir_A08G013670	Ghir_D11G000890			Ghir_D11G023440		Ghir_D10G006370	Ghir_A09G006010			Ghir_D09G012200	Ghir_A13G008500		Ghir_D11G001870
	Ghir_A08G014130	Ghir_D11G001310			Ghir_D11G023700		Ghir_D10G006480	Ghir_A09G006150			Ghir_D09G012430	Ghir_A13G008610		Ghir_D11G002060
	Ghir_A08G014170	Ghir_D11G001320			Ghir_D11G023780		Ghir_D10G008720	Ghir_A09G006280			Ghir_D09G013170	Ghir_A13G008710		Ghir_D11G002890
	Ghir_A08G014190	Ghir_D11G001620			Ghir_D11G023980		Ghir_D10G008990	Ghir_A09G006480			Ghir_D09G013420	Ghir_A13G008770		Ghir_D11G003210
	Ghir_A08G014210	Ghir_D11G001650			Ghir_D11G023990		Ghir_D10G009620	Ghir_A09G007130			Ghir_D09G013560	Ghir_A13G008960		Ghir_D11G003430
	Ghir_A08G014280	Ghir_D11G002450			Ghir_D11G024100		Ghir_D10G009680	Ghir_A09G007250			Ghir_D09G013780	Ghir_A13G009140		Ghir_D11G003880
	Ghir_A08G014410	Ghir_D11G002640			Ghir_D11G024470		Ghir_D10G009790	Ghir_A09G007360			Ghir_D09G013960	Ghir_A13G009210		Ghir_D11G003890
	Ghir_A08G014480	Ghir_D11G002890			Ghir_D11G025150		Ghir_D10G010580	Ghir_A09G007440			Ghir_D09G014380	Ghir_A13G009380		Ghir_D11G004270
	Ghir_A08G014530	Ghir_D11G002980			Ghir_D11G025960		Ghir_D10G010790	Ghir_A09G007640			Ghir_D09G014400	Ghir_A13G009740		Ghir_D11G004360
	Ghir_A08G014800	Ghir_D11G003030			Ghir_D11G026240		Ghir_D10G011160	Ghir_A09G007670			Ghir_D09G014890	Ghir_A13G009810		Ghir_D11G004490
	Ghir_A08G014890	Ghir_D11G003160			Ghir_D11G027070		Ghir_D10G011350	Ghir_A09G007730			Ghir_D09G015200	Ghir_A13G010050		Ghir_D11G005800
	Ghir_A08G015130	Ghir_D11G003210			Ghir_D11G027230		Ghir_D10G011890	Ghir_A09G008100			Ghir_D09G015230	Ghir_A13G010370		Ghir_D11G005810
	Ghir_A08G015180	Ghir_D11G003880			Ghir_D11G027710		Ghir_D10G012070	Ghir_A09G008160			Ghir_D09G015390	Ghir_A13G010430		Ghir_D11G005970
	Ghir_A08G015200	Ghir_D11G004050			Ghir_D11G027790		Ghir_D10G012330	Ghir_A09G008480			Ghir_D09G015850	Ghir_A13G010460		Ghir_D11G006430
	Ghir_A08G015230	Ghir_D11G004270			Ghir_D11G027830		Ghir_D10G012370	Ghir_A09G008570			Ghir_D09G016100	Ghir_A13G010740		Ghir_D11G006470
	Ghir_A08G015380	Ghir_D11G004360			Ghir_D11G027840		Ghir_D10G013830	Ghir_A09G008590			Ghir_D09G016280	Ghir_A13G010760		Ghir_D11G006490
	Ghir_A08G015820	Ghir_D11G004650			Ghir_D11G028410		Ghir_D10G014090	Ghir_A09G008660			Ghir_D09G016320	Ghir_A13G011370		Ghir_D11G006650
	Ghir_A08G015830	Ghir_D11G004790			Ghir_D11G029540		Ghir_D10G014290	Ghir_A09G008780			Ghir_D09G016990	Ghir_A13G011420		Ghir_D11G006910
	Ghir_A08G016050	Ghir_D11G004860			Ghir_D11G029580		Ghir_D10G015570	Ghir_A09G008850			Ghir_D09G017180	Ghir_A13G011720		Ghir_D11G007050
	Ghir_A08G016150	Ghir_D11G004880			Ghir_D11G029950		Ghir_D10G015750	Ghir_A09G008870			Ghir_D09G017830	Ghir_A13G011830		Ghir_D11G007710
	Ghir_A08G016190	Ghir_D11G005260			Ghir_D11G030860		Ghir_D10G017030	Ghir_A09G008900			Ghir_D09G018180	Ghir_A13G011980		Ghir_D11G007820
	Ghir_A08G016220	Ghir_D11G005340			Ghir_D11G030920		Ghir_D10G017050	Ghir_A09G008920			Ghir_D09G018240	Ghir_A13G012090		Ghir_D11G007850
	Ghir_A08G016330	Ghir_D11G005720			Ghir_D11G031800		Ghir_D10G017450	Ghir_A09G009200			Ghir_D09G018570	Ghir_A13G012140		Ghir_D11G007890
	Ghir_A08G016560	Ghir_D11G005810			Ghir_D11G032050		Ghir_D10G017470	Ghir_A09G009290			Ghir_D09G018750	Ghir_A13G013290		Ghir_D11G007900
	Ghir_A08G017240	Ghir_D11G006140			Ghir_D11G032160		Ghir_D10G017510	Ghir_A09G009360			Ghir_D09G019600	Ghir_A13G013370		Ghir_D11G008030
	Ghir_A08G017260	Ghir_D11G006210			Ghir_D11G032780		Ghir_D10G017900	Ghir_A09G009530			Ghir_D09G020140	Ghir_A13G014740		Ghir_D11G008070
	Ghir_A08G017310	Ghir_D11G006470			Ghir_D11G032980		Ghir_D10G018600	Ghir_A09G010060			Ghir_D09G020440	Ghir_A13G015510		Ghir_D11G008160
	Ghir_A08G017400	Ghir_D11G006490			Ghir_D11G034710		Ghir_D10G018910	Ghir_A09G010150			Ghir_D09G020580	Ghir_A13G015540		Ghir_D11G008910
	Ghir_A08G017470	Ghir_D11G006910			Ghir_D11G035460		Ghir_D10G018970	Ghir_A09G010170			Ghir_D09G020990	Ghir_A13G015610		Ghir_D11G008950
	Ghir_A08G017480	Ghir_D11G007050			Ghir_D11G035630		Ghir_D10G021160	Ghir_A09G010670			Ghir_D09G021210	Ghir_A13G015810		Ghir_D11G009390
	Ghir_A08G017620	Ghir_D11G008140			Ghir_D11G035640		Ghir_D10G021360	Ghir_A09G010740			Ghir_D09G021420	Ghir_A13G016130		Ghir_D11G009650
	Ghir_A08G017930	Ghir_D11G008160			Ghir_D11G035840		Ghir_D10G021920	Ghir_A09G010800			Ghir_D09G021990	Ghir_A13G016270		Ghir_D11G009680
	Ghir_A08G018140	Ghir_D11G008950			Ghir_D11G036110		Ghir_D10G021940	Ghir_A09G010830			Ghir_D09G022020	Ghir_A13G016720		Ghir_D11G009730
	Ghir_A08G018220	Ghir_D11G009390			Ghir_D11G036610		Ghir_D10G023090	Ghir_A09G010850			Ghir_D09G022030	Ghir_A13G016910		Ghir_D11G009820
	Ghir_A08G018310	Ghir_D11G009730			Ghir_D11G036840		Ghir_D10G024010	Ghir_A09G010870			Ghir_D09G022760	Ghir_A13G017350		Ghir_D11G009910
	Ghir_A08G018430	Ghir_D11G009820			Ghir_D12G000170		Ghir_D10G024140	Ghir_A09G011330			Ghir_D09G022850	Ghir_A13G017390		Ghir_D11G010490
	Ghir_A08G018850	Ghir_D11G009910			Ghir_D12G000760		Ghir_D10G025220	Ghir_A09G011450			Ghir_D09G023300	Ghir_A13G017730		Ghir_D11G011000
	Ghir_A08G019030	Ghir_D11G010490			Ghir_D12G000890		Ghir_D10G025630	Ghir_A09G011590			Ghir_D09G023430	Ghir_A13G017760		Ghir_D11G011160
	Ghir_A08G019110	Ghir_D11G011000			Ghir_D12G001180		Ghir_D10G025880	Ghir_A09G011940			Ghir_D09G023570	Ghir_A13G018070		Ghir_D11G011600
	Ghir_A08G019270	Ghir_D11G011160			Ghir_D12G001440		Ghir_D10G026050	Ghir_A09G011950			Ghir_D09G023820	Ghir_A13G018100		Ghir_D11G011790
	Ghir_A08G019290	Ghir_D11G011270			Ghir_D12G001470		Ghir_D10G026430	Ghir_A09G011990			Ghir_D09G023880	Ghir_A13G018400		Ghir_D11G011870
	Ghir_A08G019300	Ghir_D11G011790			Ghir_D12G002080		Ghir_D10G026670	Ghir_A09G012000			Ghir_D09G023930	Ghir_A13G018430		Ghir_D11G013260
	Ghir_A08G019470	Ghir_D11G012270			Ghir_D12G002230		Ghir_D10G027410	Ghir_A09G012030			Ghir_D09G024170	Ghir_A13G018470		Ghir_D11G014220
	Ghir_A08G019720	Ghir_D11G012460			Ghir_D12G002770		Ghir_D10G027420	Ghir_A09G012050			Ghir_D09G024200	Ghir_A13G018720		Ghir_D11G014240
	Ghir_A08G019800	Ghir_D11G014240			Ghir_D12G003010		Ghir_D11G001120	Ghir_A09G012210			Ghir_D09G024980	Ghir_A13G018800		Ghir_D11G015060
	Ghir_A08G019860	Ghir_D11G015290			Ghir_D12G003270		Ghir_D11G001210	Ghir_A09G012230			Ghir_D09G025050	Ghir_A13G019360		Ghir_D11G015160
	Ghir_A08G020090	Ghir_D11G015520			Ghir_D12G005390		Ghir_D11G001280	Ghir_A09G012570			Ghir_D09G025250	Ghir_A13G019420		Ghir_D11G015820
	Ghir_A08G020220	Ghir_D11G015940			Ghir_D12G005410		Ghir_D11G001340	Ghir_A09G012710			Ghir_D10G000180	Ghir_A13G019460		Ghir_D11G016010
	Ghir_A08G020270	Ghir_D11G016490			Ghir_D12G006230		Ghir_D11G001400	Ghir_A09G012720			Ghir_D10G000260	Ghir_A13G019500		Ghir_D11G017220
	Ghir_A08G020350	Ghir_D11G017670			Ghir_D12G006710		Ghir_D11G001800	Ghir_A09G012730			Ghir_D10G000330	Ghir_A13G019780		Ghir_D11G017690
	Ghir_A08G021110	Ghir_D11G018230			Ghir_D12G006910		Ghir_D11G001870	Ghir_A09G013020			Ghir_D10G000340	Ghir_A13G019890		Ghir_D11G017830
	Ghir_A08G021610	Ghir_D11G018360			Ghir_D12G006970		Ghir_D11G002860	Ghir_A09G013040			Ghir_D10G000530	Ghir_A13G020030		Ghir_D11G017940
	Ghir_A08G021990	Ghir_D11G018440			Ghir_D12G007070		Ghir_D11G003290	Ghir_A09G013140			Ghir_D10G000550	Ghir_A13G020490		Ghir_D11G018480
	Ghir_A08G022160	Ghir_D11G018520			Ghir_D12G008780		Ghir_D11G003320	Ghir_A09G013630			Ghir_D10G000590	Ghir_A13G020530		Ghir_D11G018570
	Ghir_A08G022270	Ghir_D11G019110			Ghir_D12G009700		Ghir_D11G003430	Ghir_A09G013740			Ghir_D10G000650	Ghir_A13G020550		Ghir_D11G018870
	Ghir_A08G022420	Ghir_D11G020340			Ghir_D12G009990		Ghir_D11G003480	Ghir_A09G013750			Ghir_D10G000810	Ghir_A13G020680		Ghir_D11G019110
	Ghir_A08G022470	Ghir_D11G020400			Ghir_D12G010320		Ghir_D11G003890	Ghir_A09G013860			Ghir_D10G001160	Ghir_A13G020950		Ghir_D11G019840
	Ghir_A08G022480	Ghir_D11G021080			Ghir_D12G011850		Ghir_D11G004490	Ghir_A09G013990			Ghir_D10G001190	Ghir_A13G021100		Ghir_D11G021080
	Ghir_A08G022880	Ghir_D11G021430			Ghir_D12G012040		Ghir_D11G004690	Ghir_A09G014140			Ghir_D10G001730	Ghir_A13G021150		Ghir_D11G021410
	Ghir_A08G022910	Ghir_D11G021930			Ghir_D12G012460		Ghir_D11G005220	Ghir_A09G014200			Ghir_D10G002920	Ghir_A13G021200		Ghir_D11G021840
	Ghir_A08G023250	Ghir_D11G022490			Ghir_D12G012560		Ghir_D11G005750	Ghir_A09G014340			Ghir_D10G003010	Ghir_A13G021360		Ghir_D11G022130
	Ghir_A08G023410	Ghir_D11G022940			Ghir_D12G012940		Ghir_D11G005820	Ghir_A09G014400			Ghir_D10G003710	Ghir_A13G021410		Ghir_D11G022490
	Ghir_A08G023420	Ghir_D11G024230			Ghir_D12G013670		Ghir_D11G005870	Ghir_A09G014600			Ghir_D10G003790	Ghir_A13G021690		Ghir_D11G022970
	Ghir_A08G023550	Ghir_D11G024300			Ghir_D12G013730		Ghir_D11G006090	Ghir_A09G014650			Ghir_D10G004000	Ghir_A13G021830		Ghir_D11G023460
	Ghir_A08G023620	Ghir_D11G024560			Ghir_D12G013920		Ghir_D11G006430	Ghir_A09G014760			Ghir_D10G004200	Ghir_A13G022330		Ghir_D11G024060
	Ghir_A08G023670	Ghir_D11G025060			Ghir_D12G014150		Ghir_D11G006510	Ghir_A09G014820			Ghir_D10G004370	Ghir_A13G022400		Ghir_D11G024590
	Ghir_A08G023990	Ghir_D11G025270			Ghir_D12G014190		Ghir_D11G006650	Ghir_A09G014850			Ghir_D10G004870	Ghir_A13G022560		Ghir_D11G025050
	Ghir_A08G024070	Ghir_D11G025430			Ghir_D12G014400		Ghir_D11G007820	Ghir_A09G014910			Ghir_D10G005100	Ghir_A13G022830		Ghir_D11G025200
	Ghir_A08G024270	Ghir_D11G025480			Ghir_D12G014740		Ghir_D11G007850	Ghir_A09G015230			Ghir_D10G005410	Ghir_A13G022840		Ghir_D11G025260
	Ghir_A08G024460	Ghir_D11G025490			Ghir_D12G015270		Ghir_D11G007890	Ghir_A09G015560			Ghir_D10G005450	Ghir_A13G022910		Ghir_D11G025430
	Ghir_A08G024710	Ghir_D11G025670			Ghir_D12G015420		Ghir_D11G008000	Ghir_A09G015590			Ghir_D10G006360	Ghir_A13G022960		Ghir_D11G025870
	Ghir_A08G024720	Ghir_D11G025990			Ghir_D12G015490		Ghir_D11G008030	Ghir_A09G015610			Ghir_D10G006750	Ghir_A13G023130		Ghir_D11G025990
	Ghir_A08G024910	Ghir_D11G027750			Ghir_D12G015600		Ghir_D11G008070	Ghir_A09G015680			Ghir_D10G007580	Ghir_A13G023160		Ghir_D11G028600
	Ghir_A08G025100	Ghir_D11G029150			Ghir_D12G015630		Ghir_D11G008910	Ghir_A09G015690			Ghir_D10G007600	Ghir_A13G023240		Ghir_D11G028790
	Ghir_A08G025130	Ghir_D11G029160			Ghir_D12G016180		Ghir_D11G009430	Ghir_A09G015760			Ghir_D10G008540	Ghir_A13G023340		Ghir_D11G029150
	Ghir_A08G025160	Ghir_D11G029820			Ghir_D12G016530		Ghir_D11G009650	Ghir_A09G015900			Ghir_D10G008990	Ghir_A13G023420		Ghir_D11G029160
	Ghir_A08G025300	Ghir_D11G029880			Ghir_D12G017020		Ghir_D11G010530	Ghir_A09G015950			Ghir_D10G009110	Ghir_A13G023710		Ghir_D11G029380
	Ghir_A08G025320	Ghir_D11G030130			Ghir_D12G017200		Ghir_D11G012120	Ghir_A09G016140			Ghir_D10G009620	Ghir_A13G023730		Ghir_D11G029590
	Ghir_A08G025640	Ghir_D11G031240			Ghir_D12G017420		Ghir_D11G012280	Ghir_A09G016160			Ghir_D10G009680	Ghir_A13G023870		Ghir_D11G029710
	Ghir_A08G025730	Ghir_D11G031890			Ghir_D12G017610		Ghir_D11G012970	Ghir_A09G016330			Ghir_D10G010580	Ghir_A13G024240		Ghir_D11G029820
	Ghir_A08G025820	Ghir_D11G032270			Ghir_D12G017970		Ghir_D11G015060	Ghir_A09G016610			Ghir_D10G010790	Ghir_A13G024300		Ghir_D11G029920
	Ghir_A08G025960	Ghir_D11G033070			Ghir_D12G018250		Ghir_D11G015160	Ghir_A09G016790			Ghir_D10G011360	Ghir_A13G024480		Ghir_D11G030080
	Ghir_A08G026020	Ghir_D11G033560			Ghir_D12G018600		Ghir_D11G015510	Ghir_A09G017110			Ghir_D10G011640	Ghir_A13G024660		Ghir_D11G030130
	Ghir_A08G026090	Ghir_D11G034730			Ghir_D12G018810		Ghir_D11G016010	Ghir_A09G017130			Ghir_D10G011890	Ghir_D01G000120		Ghir_D11G030260
	Ghir_A08G026130	Ghir_D11G035180			Ghir_D12G019100		Ghir_D11G016690	Ghir_A09G017140			Ghir_D10G012510	Ghir_D01G000220		Ghir_D11G031240
	Ghir_A08G026710	Ghir_D11G035200			Ghir_D12G019800		Ghir_D11G017190	Ghir_A09G017230			Ghir_D10G012530	Ghir_D01G000340		Ghir_D11G031730
	Ghir_A08G026780	Ghir_D11G035270			Ghir_D12G020050		Ghir_D11G017220	Ghir_A09G017290			Ghir_D10G013200	Ghir_D01G000380		Ghir_D11G031900
	Ghir_A09G000070	Ghir_D11G035390			Ghir_D12G020070		Ghir_D11G017830	Ghir_A09G017360			Ghir_D10G013270	Ghir_D01G000480		Ghir_D11G032020
	Ghir_A09G000140	Ghir_D11G035510			Ghir_D12G020460		Ghir_D11G017940	Ghir_A09G017470			Ghir_D10G013670	Ghir_D01G000750		Ghir_D11G033050
	Ghir_A09G000180	Ghir_D11G035680			Ghir_D12G020850		Ghir_D11G017980	Ghir_A09G017640			Ghir_D10G013830	Ghir_D01G001010		Ghir_D11G033810
	Ghir_A09G000200	Ghir_D11G035770			Ghir_D12G021020		Ghir_D11G018480	Ghir_A09G017680			Ghir_D10G014890	Ghir_D01G001650		Ghir_D11G033830
	Ghir_A09G000280	Ghir_D11G036580			Ghir_D12G021230		Ghir_D11G018570	Ghir_A09G017760			Ghir_D10G014950	Ghir_D01G001760		Ghir_D11G034480
	Ghir_A09G000540	Ghir_D12G000110			Ghir_D12G021550		Ghir_D11G018870	Ghir_A09G017850			Ghir_D10G015000	Ghir_D01G001880		Ghir_D11G034530
	Ghir_A09G000680	Ghir_D12G000270			Ghir_D12G021960		Ghir_D11G018980	Ghir_A09G017950			Ghir_D10G015950	Ghir_D01G002060		Ghir_D11G034730
	Ghir_A09G000970	Ghir_D12G001000			Ghir_D12G022320		Ghir_D11G019690	Ghir_A09G018000			Ghir_D10G017790	Ghir_D01G002240		Ghir_D11G035200
	Ghir_A09G001050	Ghir_D12G001080			Ghir_D12G022490		Ghir_D11G019750	Ghir_A09G018040			Ghir_D10G017990	Ghir_D01G002260		Ghir_D11G035720
	Ghir_A09G001090	Ghir_D12G001520			Ghir_D12G022600		Ghir_D11G019840	Ghir_A09G018130			Ghir_D10G018490	Ghir_D01G002400		Ghir_D11G035830
	Ghir_A09G001140	Ghir_D12G001710			Ghir_D12G022890		Ghir_D11G020520	Ghir_A09G018190			Ghir_D10G019790	Ghir_D01G002430		Ghir_D11G036150
	Ghir_A09G001160	Ghir_D12G001790			Ghir_D12G023190		Ghir_D11G021840	Ghir_A09G018410			Ghir_D10G020340	Ghir_D01G002830		Ghir_D11G036580
	Ghir_A09G001450	Ghir_D12G001940			Ghir_D12G023430		Ghir_D11G021950	Ghir_A09G018570			Ghir_D10G021000	Ghir_D01G003040		Ghir_D11G036670
	Ghir_A09G001650	Ghir_D12G002240			Ghir_D12G023460		Ghir_D11G022200	Ghir_A09G018580			Ghir_D10G021140	Ghir_D01G003830		Ghir_D12G000110
	Ghir_A09G001670	Ghir_D12G002630			Ghir_D12G024100		Ghir_D11G022610	Ghir_A09G018740			Ghir_D10G021770	Ghir_D01G003910		Ghir_D12G000160
	Ghir_A09G001740	Ghir_D12G002650			Ghir_D12G024270		Ghir_D11G022730	Ghir_A09G018900			Ghir_D10G021830	Ghir_D01G004210		Ghir_D12G000840
	Ghir_A09G002050	Ghir_D12G003140			Ghir_D12G024340		Ghir_D11G022930	Ghir_A09G019010			Ghir_D10G024200	Ghir_D01G004370		Ghir_D12G001080
	Ghir_A09G002070	Ghir_D12G003240			Ghir_D12G025030		Ghir_D11G024060	Ghir_A09G019280			Ghir_D10G024440	Ghir_D01G004510		Ghir_D12G001330
	Ghir_A09G002320	Ghir_D12G003970			Ghir_D12G025280		Ghir_D11G024590	Ghir_A09G019290			Ghir_D10G024570	Ghir_D01G004590		Ghir_D12G001630
	Ghir_A09G002570	Ghir_D12G004460			Ghir_D12G025320		Ghir_D11G025200	Ghir_A09G019350			Ghir_D10G025170	Ghir_D01G004730		Ghir_D12G001950
	Ghir_A09G002580	Ghir_D12G004620			Ghir_D12G025340		Ghir_D11G025260	Ghir_A09G019510			Ghir_D10G025270	Ghir_D01G004950		Ghir_D12G002250
	Ghir_A09G002890	Ghir_D12G005150			Ghir_D12G025420		Ghir_D11G025660	Ghir_A09G019530			Ghir_D10G026050	Ghir_D01G005000		Ghir_D12G002480
	Ghir_A09G003110	Ghir_D12G005980			Ghir_D12G025940		Ghir_D11G025720	Ghir_A09G019820			Ghir_D10G027410	Ghir_D01G005360		Ghir_D12G002650
	Ghir_A09G003150	Ghir_D12G006830			Ghir_D12G026300		Ghir_D11G025870	Ghir_A09G019990			Ghir_D11G000450	Ghir_D01G005440		Ghir_D12G002910
	Ghir_A09G003260	Ghir_D12G006890			Ghir_D12G026600		Ghir_D11G026250	Ghir_A09G020020			Ghir_D11G001120	Ghir_D01G005450		Ghir_D12G002920
	Ghir_A09G003360	Ghir_D12G006950			Ghir_D12G026760		Ghir_D11G026290	Ghir_A09G020080			Ghir_D11G001280	Ghir_D01G005600		Ghir_D12G003160
	Ghir_A09G003560	Ghir_D12G007420			Ghir_D12G027830		Ghir_D11G026300	Ghir_A09G020080			Ghir_D11G001310	Ghir_D01G005660		Ghir_D12G003230
	Ghir_A09G003580	Ghir_D12G007740			Ghir_D12G028140		Ghir_D11G028110	Ghir_A09G020190			Ghir_D11G001380	Ghir_D01G005980		Ghir_D12G003240
	Ghir_A09G003640	Ghir_D12G008000			Ghir_D12G028940		Ghir_D11G028250	Ghir_A09G020320			Ghir_D11G001580	Ghir_D01G006240		Ghir_D12G003710
	Ghir_A09G003910	Ghir_D12G008930			Ghir_D12G028970		Ghir_D11G028600	Ghir_A09G020470			Ghir_D11G001670	Ghir_D01G006330		Ghir_D12G003820
	Ghir_A09G003960	Ghir_D12G009450			Ghir_D12G028990		Ghir_D11G028940	Ghir_A09G020490			Ghir_D11G002210	Ghir_D01G006580		Ghir_D12G003970
	Ghir_A09G004240	Ghir_D12G009790			Ghir_D13G000080		Ghir_D11G029140	Ghir_A09G020620			Ghir_D11G002480	Ghir_D01G006640		Ghir_D12G004000
	Ghir_A09G004510	Ghir_D12G009830			Ghir_D13G000330		Ghir_D11G029320	Ghir_A09G020850			Ghir_D11G002520	Ghir_D01G006820		Ghir_D12G004540
	Ghir_A09G004840	Ghir_D12G010480			Ghir_D13G001320		Ghir_D11G029380	Ghir_A09G020980			Ghir_D11G002860	Ghir_D01G006920		Ghir_D12G004570
	Ghir_A09G005030	Ghir_D12G010540			Ghir_D13G001430		Ghir_D11G029420	Ghir_A09G020990			Ghir_D11G003030	Ghir_D01G006930		Ghir_D12G004760
	Ghir_A09G005050	Ghir_D12G010880			Ghir_D13G001760		Ghir_D11G029590	Ghir_A09G021290			Ghir_D11G003060	Ghir_D01G006950		Ghir_D12G004770
	Ghir_A09G005130	Ghir_D12G011080			Ghir_D13G001970		Ghir_D11G029710	Ghir_A09G021320			Ghir_D11G003270	Ghir_D01G007060		Ghir_D12G004880
	Ghir_A09G005150	Ghir_D12G011340			Ghir_D13G002300		Ghir_D11G029890	Ghir_A09G021460			Ghir_D11G003370	Ghir_D01G007300		Ghir_D12G004970
	Ghir_A09G005220	Ghir_D12G012080			Ghir_D13G002380		Ghir_D11G029920	Ghir_A09G021620			Ghir_D11G004370	Ghir_D01G007560		Ghir_D12G006090
	Ghir_A09G005340	Ghir_D12G012470			Ghir_D13G003010		Ghir_D11G030120	Ghir_A09G021670			Ghir_D11G004860	Ghir_D01G007740		Ghir_D12G007460
	Ghir_A09G005370	Ghir_D12G012540			Ghir_D13G003180		Ghir_D11G030260	Ghir_A09G021680			Ghir_D11G005350	Ghir_D01G007850		Ghir_D12G007740
	Ghir_A09G005880	Ghir_D12G012760			Ghir_D13G003230		Ghir_D11G030310	Ghir_A09G021860			Ghir_D11G005390	Ghir_D01G007900		Ghir_D12G007790
	Ghir_A09G005970	Ghir_D12G012990			Ghir_D13G003350		Ghir_D11G030930	Ghir_A09G021880			Ghir_D11G005720	Ghir_D01G008140		Ghir_D12G009610
	Ghir_A09G006010	Ghir_D12G014330			Ghir_D13G004040		Ghir_D11G032710	Ghir_A09G021990			Ghir_D11G005820	Ghir_D01G008220		Ghir_D12G010780
	Ghir_A09G006170	Ghir_D12G014900			Ghir_D13G004280		Ghir_D11G033670	Ghir_A09G022160			Ghir_D11G005870	Ghir_D01G008440		Ghir_D12G011830
	Ghir_A09G006280	Ghir_D12G015010			Ghir_D13G004520		Ghir_D11G033810	Ghir_A09G022400			Ghir_D11G006000	Ghir_D01G008810		Ghir_D12G012080
	Ghir_A09G006480	Ghir_D12G015260			Ghir_D13G005990		Ghir_D11G035380	Ghir_A09G022480			Ghir_D11G006370	Ghir_D01G009200		Ghir_D12G012360
	Ghir_A09G007040	Ghir_D12G016420			Ghir_D13G006080		Ghir_D11G035720	Ghir_A09G022840			Ghir_D11G006580	Ghir_D01G009640		Ghir_D12G012540
	Ghir_A09G007130	Ghir_D12G016910			Ghir_D13G006550		Ghir_D11G035830	Ghir_A09G023050			Ghir_D11G006790	Ghir_D01G009650		Ghir_D12G012800
	Ghir_A09G007190	Ghir_D12G017710			Ghir_D13G006810		Ghir_D11G036150	Ghir_A09G023320			Ghir_D11G006930	Ghir_D01G009700		Ghir_D12G013010
	Ghir_A09G007670	Ghir_D12G017790			Ghir_D13G006860		Ghir_D11G036670	Ghir_A09G023330			Ghir_D11G006980	Ghir_D01G009800		Ghir_D12G013040
	Ghir_A09G007780	Ghir_D12G017860			Ghir_D13G006900		Ghir_D12G000840	Ghir_A09G023370			Ghir_D11G007030	Ghir_D01G010450		Ghir_D12G013770
	Ghir_A09G007950	Ghir_D12G017870			Ghir_D13G008240		Ghir_D12G001330	Ghir_A09G023380			Ghir_D11G007380	Ghir_D01G010460		Ghir_D12G014900
	Ghir_A09G008160	Ghir_D12G018630			Ghir_D13G008610		Ghir_D12G001630	Ghir_A09G023410			Ghir_D11G007540	Ghir_D01G010560		Ghir_D12G015010
	Ghir_A09G008270	Ghir_D12G018820			Ghir_D13G009560		Ghir_D12G001950	Ghir_A09G023450			Ghir_D11G008140	Ghir_D01G010840		Ghir_D12G015260
	Ghir_A09G008440	Ghir_D12G018960			Ghir_D13G009740		Ghir_D12G002250	Ghir_A09G023950			Ghir_D11G008190	Ghir_D01G010870		Ghir_D12G016140
	Ghir_A09G008480	Ghir_D12G019330			Ghir_D13G011060		Ghir_D12G002480	Ghir_A09G023970			Ghir_D11G008660	Ghir_D01G010970		Ghir_D12G016700
	Ghir_A09G008570	Ghir_D12G019790			Ghir_D13G011380		Ghir_D12G002910	Ghir_A09G023990			Ghir_D11G009950	Ghir_D01G011020		Ghir_D12G017860
	Ghir_A09G008590	Ghir_D12G020200			Ghir_D13G011460		Ghir_D12G002920	Ghir_A09G024210			Ghir_D11G010020	Ghir_D01G011500		Ghir_D12G017870
	Ghir_A09G008660	Ghir_D12G020660			Ghir_D13G012080		Ghir_D12G003160	Ghir_A09G024220			Ghir_D11G010580	Ghir_D01G012460		Ghir_D12G018110
	Ghir_A09G008850	Ghir_D12G020930			Ghir_D13G012090		Ghir_D12G003730	Ghir_A09G024240			Ghir_D11G011780	Ghir_D01G012680		Ghir_D12G018300
	Ghir_A09G008870	Ghir_D12G021280			Ghir_D13G012390		Ghir_D12G003960	Ghir_A09G024300			Ghir_D11G012120	Ghir_D01G012840		Ghir_D12G018820
	Ghir_A09G008900	Ghir_D12G021860			Ghir_D13G012550		Ghir_D12G003980	Ghir_A09G024560			Ghir_D11G012180	Ghir_D01G013020		Ghir_D12G019210
	Ghir_A09G008920	Ghir_D12G022500			Ghir_D13G012600		Ghir_D12G004000	Ghir_A09G025180			Ghir_D11G012280	Ghir_D01G013070		Ghir_D12G019260
	Ghir_A09G009110	Ghir_D12G022670			Ghir_D13G013000		Ghir_D12G004100	Ghir_A09G025310			Ghir_D11G013510	Ghir_D01G013440		Ghir_D12G020300
	Ghir_A09G009200	Ghir_D12G023710			Ghir_D13G013040		Ghir_D12G004260	Ghir_A09G025360			Ghir_D11G014230	Ghir_D01G013710		Ghir_D12G020430
	Ghir_A09G009320	Ghir_D12G023900			Ghir_D13G013210		Ghir_D12G004300	Ghir_A09G025380			Ghir_D11G014510	Ghir_D01G014130		Ghir_D12G020700
	Ghir_A09G009360	Ghir_D12G024110			Ghir_D13G013510		Ghir_D12G004390	Ghir_A09G025560			Ghir_D11G014650	Ghir_D01G014470		Ghir_D12G020740
	Ghir_A09G009530	Ghir_D12G024250			Ghir_D13G013810		Ghir_D12G004510	Ghir_A09G025640			Ghir_D11G015180	Ghir_D01G014590		Ghir_D12G020930
	Ghir_A09G009630	Ghir_D12G024490			Ghir_D13G014090		Ghir_D12G004680	Ghir_A09G025660			Ghir_D11G015510	Ghir_D01G014830		Ghir_D12G021670
	Ghir_A09G009970	Ghir_D12G024570			Ghir_D13G014220		Ghir_D12G004760	Ghir_A09G025690			Ghir_D11G016690	Ghir_D01G015130		Ghir_D12G021740
	Ghir_A09G010170	Ghir_D12G024850			Ghir_D13G014640		Ghir_D12G004770	Ghir_A09G025760			Ghir_D11G017040	Ghir_D01G015540		Ghir_D12G022120
	Ghir_A09G010740	Ghir_D12G025470			Ghir_D13G015020		Ghir_D12G004880	Ghir_A09G025990			Ghir_D11G017630	Ghir_D01G015950		Ghir_D12G022500
	Ghir_A09G010800	Ghir_D12G025550			Ghir_D13G015050		Ghir_D12G005070	Ghir_A09G026030			Ghir_D11G017980	Ghir_D01G016010		Ghir_D12G022910
	Ghir_A09G010830	Ghir_D12G025680			Ghir_D13G015510		Ghir_D12G005080	Ghir_A09G026120			Ghir_D11G018140	Ghir_D01G016260		Ghir_D12G023020
	Ghir_A09G010850	Ghir_D12G025800			Ghir_D13G015750		Ghir_D12G005100	Ghir_A09G026180			Ghir_D11G018360	Ghir_D01G016270		Ghir_D12G023230
	Ghir_A09G011220	Ghir_D12G026060			Ghir_D13G016270		Ghir_D12G005380	Ghir_A09G026240			Ghir_D11G018820	Ghir_D01G016570		Ghir_D12G024400
	Ghir_A09G011330	Ghir_D12G026070			Ghir_D13G016370		Ghir_D12G008450	Ghir_A09G026420			Ghir_D11G018920	Ghir_D01G016580		Ghir_D12G024570
	Ghir_A09G011450	Ghir_D12G026180			Ghir_D13G016460		Ghir_D12G009300	Ghir_A09G026460			Ghir_D11G018980	Ghir_D01G016680		Ghir_D12G024850
	Ghir_A09G011500	Ghir_D12G026550			Ghir_D13G016750		Ghir_D12G009930	Ghir_A09G026520			Ghir_D11G019390	Ghir_D01G016950		Ghir_D12G025400
	Ghir_A09G011570	Ghir_D12G026850			Ghir_D13G018480		Ghir_D12G010690	Ghir_A10G000090			Ghir_D11G019930	Ghir_D01G017360		Ghir_D12G025700
	Ghir_A09G011760	Ghir_D12G027300			Ghir_D13G018870		Ghir_D12G011830	Ghir_A10G000150			Ghir_D11G020570	Ghir_D01G017540		Ghir_D12G026460
	Ghir_A09G011940	Ghir_D12G027410			Ghir_D13G018990		Ghir_D12G012210	Ghir_A10G000320			Ghir_D11G020840	Ghir_D01G017660		Ghir_D12G026550
	Ghir_A09G011950	Ghir_D12G027540			Ghir_D13G019380		Ghir_D12G012360	Ghir_A10G000470			Ghir_D11G020860	Ghir_D01G017700		Ghir_D12G026770
	Ghir_A09G011960	Ghir_D12G029040			Ghir_D13G019440		Ghir_D12G012420	Ghir_A10G000510			Ghir_D11G020870	Ghir_D01G018470		Ghir_D12G026920
	Ghir_A09G011990	Ghir_D12G029050			Ghir_D13G019480		Ghir_D12G013010	Ghir_A10G000540			Ghir_D11G021180	Ghir_D01G018650		Ghir_D12G027410
	Ghir_A09G012000	Ghir_D12G029530			Ghir_D13G019490		Ghir_D12G013040	Ghir_A10G000650			Ghir_D11G021290	Ghir_D01G019030		Ghir_D12G028390
	Ghir_A09G012030	Ghir_D13G000750			Ghir_D13G019860		Ghir_D12G013330	Ghir_A10G000710			Ghir_D11G021720	Ghir_D01G019900		Ghir_D12G028670
	Ghir_A09G012050	Ghir_D13G001130			Ghir_D13G020150		Ghir_D12G013430	Ghir_A10G000780			Ghir_D11G021950	Ghir_D01G019930		Ghir_D12G028870
	Ghir_A09G012080	Ghir_D13G001620			Ghir_D13G020190		Ghir_D12G013770	Ghir_A10G000910			Ghir_D11G022150	Ghir_D01G020000		Ghir_D12G029050
	Ghir_A09G012230	Ghir_D13G001640			Ghir_D13G020450		Ghir_D12G014120	Ghir_A10G001030			Ghir_D11G022400	Ghir_D01G020030		Ghir_D12G029190
	Ghir_A09G012420	Ghir_D13G001720			Ghir_D13G021160		Ghir_D12G014250	Ghir_A10G001310			Ghir_D11G022610	Ghir_D01G020370		Ghir_D12G029340
	Ghir_A09G012510	Ghir_D13G002140			Ghir_D13G021370		Ghir_D12G015880	Ghir_A10G001600			Ghir_D11G022920	Ghir_D01G020470		Ghir_D12G029530
	Ghir_A09G012570	Ghir_D13G002580			Ghir_D13G021410		Ghir_D12G015980	Ghir_A10G001670			Ghir_D11G022930	Ghir_D01G020610		Ghir_D13G001150
	Ghir_A09G012710	Ghir_D13G004060			Ghir_D13G021530		Ghir_D12G018990	Ghir_A10G001740			Ghir_D11G023060	Ghir_D01G020960		Ghir_D13G001250
	Ghir_A09G012730	Ghir_D13G004120			Ghir_D13G021690		Ghir_D12G019210	Ghir_A10G001790			Ghir_D11G023520	Ghir_D01G021000		Ghir_D13G001620
	Ghir_A09G013020	Ghir_D13G004270			Ghir_D13G021980		Ghir_D12G019260	Ghir_A10G001830			Ghir_D11G023820	Ghir_D01G021010		Ghir_D13G002140
	Ghir_A09G013040	Ghir_D13G004490			Ghir_D13G022080		Ghir_D12G019500	Ghir_A10G001910			Ghir_D11G023830	Ghir_D01G021220		Ghir_D13G002460
	Ghir_A09G013140	Ghir_D13G004850			Ghir_D13G022750		Ghir_D12G019870	Ghir_A10G001930			Ghir_D11G024230	Ghir_D01G021600		Ghir_D13G002580
	Ghir_A09G013340	Ghir_D13G004870			Ghir_D13G023270		Ghir_D12G020110	Ghir_A10G001940			Ghir_D11G025660	Ghir_D01G021610		Ghir_D13G002610
	Ghir_A09G013630	Ghir_D13G004970			Ghir_D13G023810		Ghir_D12G020300	Ghir_A10G002010			Ghir_D11G025720	Ghir_D01G021850		Ghir_D13G003160
	Ghir_A09G013740	Ghir_D13G005380			Ghir_D13G023840		Ghir_D12G020430	Ghir_A10G002040			Ghir_D11G025860	Ghir_D01G021880		Ghir_D13G004060
	Ghir_A09G013750	Ghir_D13G005500			Ghir_D13G024410		Ghir_D12G020700	Ghir_A10G002210			Ghir_D11G026250	Ghir_D01G021920		Ghir_D13G004270
	Ghir_A09G013860	Ghir_D13G006330			Ghir_D13G024430		Ghir_D12G021600	Ghir_A10G002220			Ghir_D11G026290	Ghir_D01G022190		Ghir_D13G004300
	Ghir_A09G013960	Ghir_D13G006840			Ghir_D13G024770		Ghir_D12G021670	Ghir_A10G002250			Ghir_D11G026300	Ghir_D01G022430		Ghir_D13G004500
	Ghir_A09G013990	Ghir_D13G007070			Ghir_D13G025260		Ghir_D12G021740	Ghir_A10G002280			Ghir_D11G026680	Ghir_D01G022460		Ghir_D13G004950
	Ghir_A09G014050	Ghir_D13G007130			Ghir_Scaffold3048G000010		Ghir_D12G022910	Ghir_A10G002390			Ghir_D11G027250	Ghir_D01G022570		Ghir_D13G005370
	Ghir_A09G014140	Ghir_D13G007290					Ghir_D12G023020	Ghir_A10G002400			Ghir_D11G027940	Ghir_D01G022730		Ghir_D13G005500
	Ghir_A09G014200	Ghir_D13G008190					Ghir_D12G023230	Ghir_A10G002630			Ghir_D11G027950	Ghir_D01G023710		Ghir_D13G005820
	Ghir_A09G014340	Ghir_D13G008840					Ghir_D12G023990	Ghir_A10G002760			Ghir_D11G028110	Ghir_D01G023810		Ghir_D13G006750
	Ghir_A09G014400	Ghir_D13G009510					Ghir_D12G025400	Ghir_A10G002960			Ghir_D11G028250	Ghir_D01G023870		Ghir_D13G007320
	Ghir_A09G014550	Ghir_D13G009600					Ghir_D12G025700	Ghir_A10G003080			Ghir_D11G028810	Ghir_D01G024040		Ghir_D13G007640
	Ghir_A09G014650	Ghir_D13G011160					Ghir_D12G026270	Ghir_A10G003130			Ghir_D11G029020	Ghir_D02G000320		Ghir_D13G007810
	Ghir_A09G014670	Ghir_D13G011190					Ghir_D12G026770	Ghir_A10G003160			Ghir_D11G029140	Ghir_D02G001370		Ghir_D13G008120
	Ghir_A09G014820	Ghir_D13G011240					Ghir_D12G026860	Ghir_A10G003290			Ghir_D11G029320	Ghir_D02G001400		Ghir_D13G008150
	Ghir_A09G014850	Ghir_D13G012160					Ghir_D12G026920	Ghir_A10G003300			Ghir_D11G029970	Ghir_D02G001850		Ghir_D13G008980
	Ghir_A09G014910	Ghir_D13G013020					Ghir_D12G027190	Ghir_A10G003320			Ghir_D11G030310	Ghir_D02G001900		Ghir_D13G009600
	Ghir_A09G014930	Ghir_D13G013140					Ghir_D12G027210	Ghir_A10G003570			Ghir_D11G031650	Ghir_D02G001910		Ghir_D13G009610
	Ghir_A09G015230	Ghir_D13G013400					Ghir_D12G027780	Ghir_A10G003610			Ghir_D11G031810	Ghir_D02G002360		Ghir_D13G009960
	Ghir_A09G015540	Ghir_D13G013790					Ghir_D12G028090	Ghir_A10G003700			Ghir_D11G032680	Ghir_D02G002420		Ghir_D13G010170
	Ghir_A09G015610	Ghir_D13G014350					Ghir_D12G028390	Ghir_A10G003730			Ghir_D11G033670	Ghir_D02G003430		Ghir_D13G011010
	Ghir_A09G015680	Ghir_D13G015010					Ghir_D12G028410	Ghir_A10G003900			Ghir_D11G033870	Ghir_D02G003450		Ghir_D13G011190
	Ghir_A09G015690	Ghir_D13G015170					Ghir_D12G028440	Ghir_A10G004010			Ghir_D11G034100	Ghir_D02G003530		Ghir_D13G011320
	Ghir_A09G015760	Ghir_D13G015430					Ghir_D12G028670	Ghir_A10G004230			Ghir_D11G035030	Ghir_D02G003750		Ghir_D13G012430
	Ghir_A09G015920	Ghir_D13G015760					Ghir_D12G028680	Ghir_A10G004360			Ghir_D11G035270	Ghir_D02G004000		Ghir_D13G012800
	Ghir_A09G015950	Ghir_D13G016630					Ghir_D12G028870	Ghir_A10G004390			Ghir_D11G035680	Ghir_D02G004340		Ghir_D13G014120
	Ghir_A09G016070	Ghir_D13G018280					Ghir_D12G028910	Ghir_A10G004420			Ghir_D11G035850	Ghir_D02G004370		Ghir_D13G015090
	Ghir_A09G016110	Ghir_D13G018460					Ghir_D12G029100	Ghir_A10G004460			Ghir_D11G036020	Ghir_D02G004390		Ghir_D13G015430
	Ghir_A09G016160	Ghir_D13G018800					Ghir_D12G029190	Ghir_A10G004560			Ghir_D11G036230	Ghir_D02G004470		Ghir_D13G015680
	Ghir_A09G016300	Ghir_D13G019460					Ghir_D12G029330	Ghir_A10G004600			Ghir_D11G036320	Ghir_D02G004550		Ghir_D13G016040
	Ghir_A09G016330	Ghir_D13G019760					Ghir_D12G029340	Ghir_A10G004610			Ghir_D12G000720	Ghir_D02G004560		Ghir_D13G016630
	Ghir_A09G016410	Ghir_D13G020130					Ghir_D12G029520	Ghir_A10G004750			Ghir_D12G000910	Ghir_D02G004850		Ghir_D13G017550
	Ghir_A09G016450	Ghir_D13G020210					Ghir_D13G000930	Ghir_A10G004820			Ghir_D12G001260	Ghir_D02G005050		Ghir_D13G017790
	Ghir_A09G016520	Ghir_D13G020760					Ghir_D13G001150	Ghir_A10G004860			Ghir_D12G001520	Ghir_D02G005130		Ghir_D13G018270
	Ghir_A09G016610	Ghir_D13G021030					Ghir_D13G001250	Ghir_A10G004920			Ghir_D12G001580	Ghir_D02G005390		Ghir_D13G018890
	Ghir_A09G016790	Ghir_D13G021340					Ghir_D13G001380	Ghir_A10G005020			Ghir_D12G001590	Ghir_D02G005440		Ghir_D13G019010
	Ghir_A09G016880	Ghir_D13G021520					Ghir_D13G001450	Ghir_A10G005110			Ghir_D12G002180	Ghir_D02G005720		Ghir_D13G019220
	Ghir_A09G016910	Ghir_D13G021590					Ghir_D13G001560	Ghir_A10G005340			Ghir_D12G002240	Ghir_D02G006160		Ghir_D13G019360
	Ghir_A09G017000	Ghir_D13G022290					Ghir_D13G002610	Ghir_A10G005370			Ghir_D12G002320	Ghir_D02G006180		Ghir_D13G019390
	Ghir_A09G017110	Ghir_D13G022650					Ghir_D13G003160	Ghir_A10G005550			Ghir_D12G002780	Ghir_D02G006330		Ghir_D13G019460
	Ghir_A09G017130	Ghir_D13G023460					Ghir_D13G003530	Ghir_A10G005620			Ghir_D12G003140	Ghir_D02G006440		Ghir_D13G019760
	Ghir_A09G017140	Ghir_D13G023740					Ghir_D13G004500	Ghir_A10G005690			Ghir_D12G003960	Ghir_D02G006690		Ghir_D13G020050
	Ghir_A09G017230	Ghir_D13G023820					Ghir_D13G004670	Ghir_A10G005720			Ghir_D12G003980	Ghir_D02G006780		Ghir_D13G020130
	Ghir_A09G017290	Ghir_D13G024720					Ghir_D13G005040	Ghir_A10G006070			Ghir_D12G004260	Ghir_D02G007260		Ghir_D13G021380
	Ghir_A09G017360	Ghir_D13G025060					Ghir_D13G005370	Ghir_A10G006080			Ghir_D12G004300	Ghir_D02G007350		Ghir_D13G021390
	Ghir_A09G017620	Ghir_Scaffold2543G000010					Ghir_D13G006250	Ghir_A10G006170			Ghir_D12G004390	Ghir_D02G007690		Ghir_D13G021660
	Ghir_A09G017640	Ghir_Scaffold3028G000080					Ghir_D13G006750	Ghir_A10G006210			Ghir_D12G004510	Ghir_D02G008070		Ghir_D13G022120
	Ghir_A09G017680						Ghir_D13G007320	Ghir_A10G006370			Ghir_D12G004680	Ghir_D02G008080		Ghir_D13G022290
	Ghir_A09G017760						Ghir_D13G007760	Ghir_A10G006380			Ghir_D12G005080	Ghir_D02G008250		Ghir_D13G022350
	Ghir_A09G017900						Ghir_D13G008120	Ghir_A10G006480			Ghir_D12G005210	Ghir_D02G008260		Ghir_D13G022490
	Ghir_A09G017950						Ghir_D13G008980	Ghir_A10G006710			Ghir_D12G005440	Ghir_D02G008610		Ghir_D13G022650
	Ghir_A09G018000						Ghir_D13G009610	Ghir_A10G006940			Ghir_D12G005980	Ghir_D02G008760		Ghir_D13G022810
	Ghir_A09G018120						Ghir_D13G009870	Ghir_A10G007570			Ghir_D12G006400	Ghir_D02G008930		Ghir_D13G023740
	Ghir_A09G018130						Ghir_D13G009960	Ghir_A10G007600			Ghir_D12G007930	Ghir_D02G009090		Ghir_D13G024480
	Ghir_A09G018180						Ghir_D13G010900	Ghir_A10G007860			Ghir_D12G008020	Ghir_D02G009300		Ghir_D13G024500
	Ghir_A09G018190						Ghir_D13G011010	Ghir_A10G007910			Ghir_D12G008820	Ghir_D02G009560		Ghir_D13G024890
	Ghir_A09G018310						Ghir_D13G011040	Ghir_A10G007940			Ghir_D12G008840	Ghir_D02G009870		Ghir_D13G025060
	Ghir_A09G018460						Ghir_D13G011320	Ghir_A10G007950			Ghir_D12G009580	Ghir_D02G010130		Ghir_Scaffold1357G000060
	Ghir_A09G018520						Ghir_D13G012320	Ghir_A10G008200			Ghir_D12G009600	Ghir_D02G010450		Ghir_Scaffold3335G000040
	Ghir_A09G018570						Ghir_D13G012430	Ghir_A10G008360			Ghir_D12G009710	Ghir_D02G010880		Ghir_Scaffold866G000010
	Ghir_A09G018580						Ghir_D13G012500	Ghir_A10G008490			Ghir_D12G009930	Ghir_D02G011220
	Ghir_A09G019280						Ghir_D13G012800	Ghir_A10G008660			Ghir_D12G010590	Ghir_D02G011280
	Ghir_A09G019350						Ghir_D13G013860	Ghir_A10G008670			Ghir_D12G010690	Ghir_D02G011760
	Ghir_A09G019510						Ghir_D13G014030	Ghir_A10G008790			Ghir_D12G010720	Ghir_D02G011770
	Ghir_A09G019530						Ghir_D13G014120	Ghir_A10G008800			Ghir_D12G010880	Ghir_D02G012020
	Ghir_A09G019820						Ghir_D13G014960	Ghir_A10G008810			Ghir_D12G011730	Ghir_D02G012320
	Ghir_A09G019830						Ghir_D13G014990	Ghir_A10G008940			Ghir_D12G011820	Ghir_D02G013020
	Ghir_A09G019970						Ghir_D13G015110	Ghir_A10G008950			Ghir_D12G011990	Ghir_D02G013150
	Ghir_A09G019990						Ghir_D13G015270	Ghir_A10G008990			Ghir_D12G012140	Ghir_D02G013470
	Ghir_A09G020020						Ghir_D13G015650	Ghir_A10G009040			Ghir_D12G012210	Ghir_D02G014450
	Ghir_A09G020060						Ghir_D13G015900	Ghir_A10G009070			Ghir_D12G012680	Ghir_D02G014470
	Ghir_A09G020080						Ghir_D13G017170	Ghir_A10G009080			Ghir_D12G013000	Ghir_D02G014600
	Ghir_A09G020080						Ghir_D13G017250	Ghir_A10G009320			Ghir_D12G013230	Ghir_D02G014700
	Ghir_A09G020100						Ghir_D13G017330	Ghir_A10G009500			Ghir_D12G013290	Ghir_D02G014880
	Ghir_A09G020190						Ghir_D13G017730	Ghir_A10G009800			Ghir_D12G013330	Ghir_D02G014930
	Ghir_A09G020470						Ghir_D13G017770	Ghir_A10G010070			Ghir_D12G013430	Ghir_D02G015290
	Ghir_A09G020490						Ghir_D13G018450	Ghir_A10G010120			Ghir_D12G014130	Ghir_D02G015440
	Ghir_A09G020850						Ghir_D13G018890	Ghir_A10G010200			Ghir_D12G014260	Ghir_D02G015490
	Ghir_A09G020920						Ghir_D13G019010	Ghir_A10G010220			Ghir_D12G014330	Ghir_D02G016070
	Ghir_A09G020980						Ghir_D13G019220	Ghir_A10G010310			Ghir_D12G014500	Ghir_D02G016110
	Ghir_A09G021000						Ghir_D13G019300	Ghir_A10G010800			Ghir_D12G014870	Ghir_D02G016300
	Ghir_A09G021290						Ghir_D13G019390	Ghir_A10G010810			Ghir_D12G015220	Ghir_D02G016730
	Ghir_A09G021460						Ghir_D13G019770	Ghir_A10G010890			Ghir_D12G015360	Ghir_D02G016760
	Ghir_A09G021670						Ghir_D13G020050	Ghir_A10G011150			Ghir_D12G015880	Ghir_D02G017070
	Ghir_A09G021680						Ghir_D13G020700	Ghir_A10G011340			Ghir_D12G015960	Ghir_D02G017200
	Ghir_A09G021840						Ghir_D13G021480	Ghir_A10G011350			Ghir_D12G016390	Ghir_D02G017450
	Ghir_A09G021850						Ghir_D13G022120	Ghir_A10G011370			Ghir_D12G016660	Ghir_D02G017560
	Ghir_A09G021860						Ghir_D13G022420	Ghir_A10G011650			Ghir_D12G017080	Ghir_D02G018010
	Ghir_A09G021880						Ghir_D13G022430	Ghir_A10G011690			Ghir_D12G017500	Ghir_D02G018080
	Ghir_A09G021950						Ghir_D13G022490	Ghir_A10G011860			Ghir_D12G017790	Ghir_D02G018200
	Ghir_A09G021990						Ghir_D13G022790	Ghir_A10G011870			Ghir_D12G017820	Ghir_D02G018390
	Ghir_A09G022400						Ghir_D13G022810	Ghir_A10G011900			Ghir_D12G019420	Ghir_D02G018410
	Ghir_A09G022480						Ghir_D13G023240	Ghir_A10G012210			Ghir_D12G020200	Ghir_D02G018560
	Ghir_A09G022580						Ghir_D13G023700	Ghir_A10G012330			Ghir_D12G020310	Ghir_D02G018620
	Ghir_A09G022610						Ghir_D13G023730	Ghir_A10G012370			Ghir_D12G020330	Ghir_D02G018800
	Ghir_A09G022840						Ghir_D13G023880	Ghir_A10G012530			Ghir_D12G021160	Ghir_D02G018900
	Ghir_A09G023050						Ghir_D13G024070	Ghir_A10G012570			Ghir_D12G021600	Ghir_D02G019090
	Ghir_A09G023320						Ghir_D13G024100	Ghir_A10G012620			Ghir_D12G022020	Ghir_D02G019230
	Ghir_A09G023330						Ghir_D13G024500	Ghir_A10G012640			Ghir_D12G022160	Ghir_D02G019420
	Ghir_A09G023410						Ghir_D13G024890	Ghir_A10G012760			Ghir_D12G023990	Ghir_D02G019770
	Ghir_A09G023420						Ghir_D13G024930	Ghir_A10G013480			Ghir_D12G024000	Ghir_D02G019840
	Ghir_A09G023450						Ghir_D13G025490	Ghir_A10G013530			Ghir_D12G024360	Ghir_D02G020210
	Ghir_A09G023950						Ghir_Scaffold1276G000020	Ghir_A10G013570			Ghir_D12G024490	Ghir_D02G020260
	Ghir_A09G023990						Ghir_Scaffold1357G000060	Ghir_A10G013990			Ghir_D12G024880	Ghir_D02G020770
	Ghir_A09G024210						Ghir_Scaffold923G000030	Ghir_A10G014030			Ghir_D12G025010	Ghir_D02G021440
	Ghir_A09G024220							Ghir_A10G014080			Ghir_D12G025260	Ghir_D02G021510
	Ghir_A09G024560							Ghir_A10G014200			Ghir_D12G025410	Ghir_D02G021590
	Ghir_A09G024780							Ghir_A10G014280			Ghir_D12G025550	Ghir_D02G021940
	Ghir_A09G024880							Ghir_A10G014620			Ghir_D12G025680	Ghir_D02G022000
	Ghir_A09G025000							Ghir_A10G014670			Ghir_D12G026060	Ghir_D02G022040
	Ghir_A09G025180							Ghir_A10G014710			Ghir_D12G026090	Ghir_D02G022430
	Ghir_A09G025310							Ghir_A10G014770			Ghir_D12G026270	Ghir_D02G022500
	Ghir_A09G025370							Ghir_A10G015120			Ghir_D12G027210	Ghir_D02G023090
	Ghir_A09G025380							Ghir_A10G015170			Ghir_D12G027400	Ghir_D02G023280
	Ghir_A09G025640							Ghir_A10G015320			Ghir_D12G027910	Ghir_D02G023320
	Ghir_A09G025660							Ghir_A10G015340			Ghir_D12G028410	Ghir_D02G023550
	Ghir_A09G025670							Ghir_A10G015600			Ghir_D12G028470	Ghir_D02G023590
	Ghir_A09G025690							Ghir_A10G015640			Ghir_D12G028560	Ghir_D02G023640
	Ghir_A09G025760							Ghir_A10G016070			Ghir_D12G029040	Ghir_D02G023750
	Ghir_A09G025970							Ghir_A10G016160			Ghir_D12G029100	Ghir_D02G023860
	Ghir_A09G025990							Ghir_A10G016320			Ghir_D12G029330	Ghir_D02G023890
	Ghir_A09G026030							Ghir_A10G016420			Ghir_D12G029520	Ghir_D02G024100
	Ghir_A09G026180							Ghir_A10G016640			Ghir_D13G000100	Ghir_D02G024220
	Ghir_A09G026240							Ghir_A10G016780			Ghir_D13G000930	Ghir_D02G024280
	Ghir_A09G026320							Ghir_A10G016810			Ghir_D13G001450	Ghir_D02G024490
	Ghir_A09G026360							Ghir_A10G016890			Ghir_D13G001660	Ghir_D02G024750
	Ghir_A09G026420							Ghir_A10G016950			Ghir_D13G003150	Ghir_D02G024820
	Ghir_A09G026460							Ghir_A10G017110			Ghir_D13G003490	Ghir_D03G000090
	Ghir_A09G026520							Ghir_A10G017220			Ghir_D13G003510	Ghir_D03G000190
	Ghir_A10G000090							Ghir_A10G017250			Ghir_D13G003530	Ghir_D03G000310
	Ghir_A10G000150							Ghir_A10G017560			Ghir_D13G003550	Ghir_D03G000490
	Ghir_A10G000320							Ghir_A10G017910			Ghir_D13G004670	Ghir_D03G000610
	Ghir_A10G000360							Ghir_A10G017990			Ghir_D13G004820	Ghir_D03G000660
	Ghir_A10G000470							Ghir_A10G018050			Ghir_D13G005080	Ghir_D03G000720
	Ghir_A10G000510							Ghir_A10G018150			Ghir_D13G005380	Ghir_D03G000900
	Ghir_A10G000520							Ghir_A10G018160			Ghir_D13G005610	Ghir_D03G000920
	Ghir_A10G000540							Ghir_A10G018350			Ghir_D13G005900	Ghir_D03G001140
	Ghir_A10G000570							Ghir_A10G018450			Ghir_D13G006330	Ghir_D03G001160
	Ghir_A10G000650							Ghir_A10G018540			Ghir_D13G006390	Ghir_D03G001270
	Ghir_A10G000830							Ghir_A10G018650			Ghir_D13G006760	Ghir_D03G001310
	Ghir_A10G000910							Ghir_A10G018820			Ghir_D13G006970	Ghir_D03G001930
	Ghir_A10G001030							Ghir_A10G018950			Ghir_D13G006990	Ghir_D03G002180
	Ghir_A10G001070							Ghir_A10G018980			Ghir_D13G007760	Ghir_D03G002300
	Ghir_A10G001390							Ghir_A10G019060			Ghir_D13G008690	Ghir_D03G002570
	Ghir_A10G001400							Ghir_A10G019090			Ghir_D13G010290	Ghir_D03G002620
	Ghir_A10G001670							Ghir_A10G019120			Ghir_D13G010310	Ghir_D03G002660
	Ghir_A10G001830							Ghir_A10G020150			Ghir_D13G010850	Ghir_D03G002670
	Ghir_A10G001930							Ghir_A10G020160			Ghir_D13G010900	Ghir_D03G002720
	Ghir_A10G001940							Ghir_A10G020210			Ghir_D13G011080	Ghir_D03G002920
	Ghir_A10G002010							Ghir_A10G020340			Ghir_D13G011100	Ghir_D03G002990
	Ghir_A10G002040							Ghir_A10G020470			Ghir_D13G011160	Ghir_D03G003040
	Ghir_A10G002210							Ghir_A10G020710			Ghir_D13G011240	Ghir_D03G003710
	Ghir_A10G002390							Ghir_A10G020750			Ghir_D13G011910	Ghir_D03G004620
	Ghir_A10G002400							Ghir_A10G020840			Ghir_D13G011920	Ghir_D03G004630
	Ghir_A10G002560							Ghir_A10G020990			Ghir_D13G012220	Ghir_D03G004730
	Ghir_A10G002630							Ghir_A10G021020			Ghir_D13G012500	Ghir_D03G004770
	Ghir_A10G002690							Ghir_A10G021150			Ghir_D13G013130	Ghir_D03G004970
	Ghir_A10G002740							Ghir_A10G021180			Ghir_D13G013520	Ghir_D03G005310
	Ghir_A10G002760							Ghir_A10G021960			Ghir_D13G013790	Ghir_D03G005530
	Ghir_A10G002830							Ghir_A10G022100			Ghir_D13G013950	Ghir_D03G005630
	Ghir_A10G002960							Ghir_A10G022190			Ghir_D13G014030	Ghir_D03G005720
	Ghir_A10G003080							Ghir_A10G022380			Ghir_D13G014320	Ghir_D03G005750
	Ghir_A10G003120							Ghir_A10G022450			Ghir_D13G015160	Ghir_D03G006190
	Ghir_A10G003130							Ghir_A10G022570			Ghir_D13G015270	Ghir_D03G006250
	Ghir_A10G003230							Ghir_A10G022690			Ghir_D13G015650	Ghir_D03G006510
	Ghir_A10G003290							Ghir_A10G022710			Ghir_D13G015740	Ghir_D03G006610
	Ghir_A10G003300							Ghir_A10G023380			Ghir_D13G015870	Ghir_D03G006870
	Ghir_A10G003320							Ghir_A10G023790			Ghir_D13G016390	Ghir_D03G007200
	Ghir_A10G003370							Ghir_A10G023880			Ghir_D13G016650	Ghir_D03G007550
	Ghir_A10G003550							Ghir_A10G024080			Ghir_D13G017170	Ghir_D03G007620
	Ghir_A10G003570							Ghir_A10G024160			Ghir_D13G017330	Ghir_D03G007800
	Ghir_A10G003610							Ghir_A10G024190			Ghir_D13G017730	Ghir_D03G008660
	Ghir_A10G003670							Ghir_A10G024240			Ghir_D13G017860	Ghir_D03G009210
	Ghir_A10G003730							Ghir_A10G024350			Ghir_D13G017980	Ghir_D03G009590
	Ghir_A10G003900							Ghir_A10G024420			Ghir_D13G018490	Ghir_D03G009770
	Ghir_A10G004010							Ghir_A10G024430			Ghir_D13G018770	Ghir_D03G009860
	Ghir_A10G004220							Ghir_A10G024520			Ghir_D13G018840	Ghir_D03G009870
	Ghir_A10G004230							Ghir_A10G024530			Ghir_D13G019770	Ghir_D03G010110
	Ghir_A10G004360							Ghir_A10G024630			Ghir_D13G019940	Ghir_D03G010180
	Ghir_A10G004420							Ghir_A10G024670			Ghir_D13G020210	Ghir_D03G010210
	Ghir_A10G004460							Ghir_A10G024680			Ghir_D13G020300	Ghir_D03G010280
	Ghir_A10G004560							Ghir_A10G024780			Ghir_D13G020760	Ghir_D03G010350
	Ghir_A10G004600							Ghir_A11G000020			Ghir_D13G021340	Ghir_D03G010460
	Ghir_A10G004750							Ghir_A11G000050			Ghir_D13G021480	Ghir_D03G010500
	Ghir_A10G004820							Ghir_A11G000090			Ghir_D13G021520	Ghir_D03G010580
	Ghir_A10G004860							Ghir_A11G000110			Ghir_D13G021640	Ghir_D03G010820
	Ghir_A10G005020							Ghir_A11G000120			Ghir_D13G022170	Ghir_D03G010910
	Ghir_A10G005030							Ghir_A11G000210			Ghir_D13G022270	Ghir_D03G011170
	Ghir_A10G005110							Ghir_A11G000300			Ghir_D13G022300	Ghir_D03G011230
	Ghir_A10G005140							Ghir_A11G000450			Ghir_D13G022790	Ghir_D03G011260
	Ghir_A10G005370							Ghir_A11G000560			Ghir_D13G022900	Ghir_D03G011410
	Ghir_A10G005550							Ghir_A11G000600			Ghir_D13G022920	Ghir_D03G011650
	Ghir_A10G005620							Ghir_A11G000750			Ghir_D13G023240	Ghir_D03G012160
	Ghir_A10G005690							Ghir_A11G000950			Ghir_D13G023460	Ghir_D03G012490
	Ghir_A10G005760							Ghir_A11G001060			Ghir_D13G023700	Ghir_D03G012680
	Ghir_A10G006070							Ghir_A11G001070			Ghir_D13G023730	Ghir_D03G012760
	Ghir_A10G006170							Ghir_A11G001110			Ghir_D13G024070	Ghir_D03G012820
	Ghir_A10G006180							Ghir_A11G001170			Ghir_D13G024100	Ghir_D03G012890
	Ghir_A10G006210							Ghir_A11G001450			Ghir_D13G024550	Ghir_D03G012940
	Ghir_A10G006360							Ghir_A11G001460			Ghir_D13G024560	Ghir_D03G013010
	Ghir_A10G006370							Ghir_A11G001530			Ghir_D13G024600	Ghir_D03G013200
	Ghir_A10G006480							Ghir_A11G001680			Ghir_D13G024930	Ghir_D03G013230
	Ghir_A10G006650							Ghir_A11G001780			Ghir_D13G025580	Ghir_D03G013380
	Ghir_A10G006700							Ghir_A11G001900			Ghir_Scaffold1357G000040	Ghir_D03G013790
	Ghir_A10G006710							Ghir_A11G001910			Ghir_Scaffold2521G000020	Ghir_D03G013830
	Ghir_A10G006740							Ghir_A11G002030			Ghir_Scaffold2841G000020	Ghir_D03G013840
	Ghir_A10G006940							Ghir_A11G002040			Ghir_Scaffold423G000160	Ghir_D03G014650
	Ghir_A10G007100							Ghir_A11G002100			Ghir_Scaffold923G000030	Ghir_D03G015260
	Ghir_A10G007320							Ghir_A11G002370				Ghir_D03G015320
	Ghir_A10G007570							Ghir_A11G002400				Ghir_D03G015430
	Ghir_A10G007600							Ghir_A11G002420				Ghir_D03G015700
	Ghir_A10G007770							Ghir_A11G002460				Ghir_D03G015840
	Ghir_A10G007940							Ghir_A11G002480				Ghir_D03G015850
	Ghir_A10G007950							Ghir_A11G002510				Ghir_D03G015960
	Ghir_A10G008010							Ghir_A11G002600				Ghir_D03G016040
	Ghir_A10G008300							Ghir_A11G002760				Ghir_D03G016410
	Ghir_A10G008340							Ghir_A11G002890				Ghir_D03G016570
	Ghir_A10G008360							Ghir_A11G002990				Ghir_D03G016710
	Ghir_A10G008420							Ghir_A11G003110				Ghir_D03G016820
	Ghir_A10G008490							Ghir_A11G003180				Ghir_D03G017990
	Ghir_A10G008660							Ghir_A11G003780				Ghir_D03G018550
	Ghir_A10G008670							Ghir_A11G003810				Ghir_D03G018560
	Ghir_A10G008790							Ghir_A11G003980				Ghir_D03G018940
	Ghir_A10G008810							Ghir_A11G004030				Ghir_D03G018970
	Ghir_A10G008940							Ghir_A11G004060				Ghir_D03G019020
	Ghir_A10G009040							Ghir_A11G004210				Ghir_D04G000010
	Ghir_A10G009070							Ghir_A11G004400				Ghir_D04G000190
	Ghir_A10G009080							Ghir_A11G004740				Ghir_D04G000300
	Ghir_A10G009320							Ghir_A11G004810				Ghir_D04G000340
	Ghir_A10G009500							Ghir_A11G005030				Ghir_D04G000390
	Ghir_A10G009850							Ghir_A11G005040				Ghir_D04G000940
	Ghir_A10G010070							Ghir_A11G005120				Ghir_D04G001090
	Ghir_A10G010200							Ghir_A11G005360				Ghir_D04G001650
	Ghir_A10G010220							Ghir_A11G005570				Ghir_D04G001740
	Ghir_A10G010310							Ghir_A11G005600				Ghir_D04G001800
	Ghir_A10G010630							Ghir_A11G005670				Ghir_D04G002010
	Ghir_A10G010640							Ghir_A11G005920				Ghir_D04G002060
	Ghir_A10G010800							Ghir_A11G005980				Ghir_D04G002120
	Ghir_A10G010890							Ghir_A11G006020				Ghir_D04G002150
	Ghir_A10G011150							Ghir_A11G006110				Ghir_D04G002620
	Ghir_A10G011190							Ghir_A11G006250				Ghir_D04G002640
	Ghir_A10G011300							Ghir_A11G006300				Ghir_D04G002660
	Ghir_A10G011370							Ghir_A11G006800				Ghir_D04G002740
	Ghir_A10G011650							Ghir_A11G006990				Ghir_D04G002800
	Ghir_A10G011690							Ghir_A11G007010				Ghir_D04G004000
	Ghir_A10G011860							Ghir_A11G007060				Ghir_D04G004270
	Ghir_A10G011870							Ghir_A11G007070				Ghir_D04G004300
	Ghir_A10G011900							Ghir_A11G007370				Ghir_D04G004410
	Ghir_A10G011970							Ghir_A11G007420				Ghir_D04G004570
	Ghir_A10G012130							Ghir_A11G007450				Ghir_D04G004910
	Ghir_A10G012210							Ghir_A11G007540				Ghir_D04G005420
	Ghir_A10G012320							Ghir_A11G007640				Ghir_D04G005540
	Ghir_A10G012330							Ghir_A11G007740				Ghir_D04G005600
	Ghir_A10G012370							Ghir_A11G007780				Ghir_D04G005890
	Ghir_A10G012530							Ghir_A11G007930				Ghir_D04G006050
	Ghir_A10G012570							Ghir_A11G008060				Ghir_D04G006150
	Ghir_A10G012620							Ghir_A11G008300				Ghir_D04G006200
	Ghir_A10G012640							Ghir_A11G008420				Ghir_D04G006460
	Ghir_A10G012760							Ghir_A11G008540				Ghir_D04G006900
	Ghir_A10G013060							Ghir_A11G008770				Ghir_D04G006970
	Ghir_A10G013480							Ghir_A11G008860				Ghir_D04G007260
	Ghir_A10G013530							Ghir_A11G008920				Ghir_D04G007540
	Ghir_A10G013920							Ghir_A11G009000				Ghir_D04G007550
	Ghir_A10G014030							Ghir_A11G009140				Ghir_D04G007590
	Ghir_A10G014080							Ghir_A11G009170				Ghir_D04G007610
	Ghir_A10G014280							Ghir_A11G009250				Ghir_D04G008740
	Ghir_A10G014310							Ghir_A11G009260				Ghir_D04G009290
	Ghir_A10G014620							Ghir_A11G009280				Ghir_D04G009350
[truncated: 3,836 more rows]
