# Supplementary material for: Co-expression network and comparative transcriptome analysis for fiber initiation and elongation reveal genetic differences in two lines from upland cotton CCRI70 RIL population
Source: PeerJ. 2021 Jul 21;9:e11812. doi: 10.7717/peerj.11812 (PMC8308610; doi:10.7717/peerj.11812)
Supplement: Supplemental Information 12 [file peerj-09-11812-s012.xlsx]

## Sheet: Sheet1
Table S12. Genes listed in the modules associated with specific stages
geneID	module	KME	Arabidopsis ID	ArabDesc
Ghir_A01G003670	ovule blue	0.893999	AT5G64770
Ghir_A02G005690	ovule blue	-0.817725	AT5G65960	GTP binding
Ghir_A02G014620	ovule blue	0.804662
Ghir_A03G000310	ovule blue	0.823237	AT1G32210	Defender against death (DAD family) protein
Ghir_A05G010420	ovule blue	-0.831285	AT5G21160	LA RNA-binding protein
Ghir_A05G022390	ovule blue	0.809397	AT4G24530	O-fucosyltransferase family protein
Ghir_A05G033410	ovule blue	-0.691216	AT1G68370	Chaperone DnaJ-domain superfamily protein
Ghir_A06G019930	ovule blue	0.962027	AT3G15820	phosphatidic acid phosphatase-related / PAP2-related
Ghir_A08G000380	ovule blue	0.851236	AT5G02560	histone H2A 12
Ghir_A08G000390	ovule blue	0.784845	AT5G02560	histone H2A 12
Ghir_A08G021080	ovule blue	0.975072	AT2G30090	Acyl-CoA N-acyltransferases (NAT) superfamily protein
Ghir_A11G023430	ovule blue	0.836636	AT4G37260	myb domain protein 73
Ghir_A11G031900	ovule blue	0.960545	AT2G44260	Plant protein of unknown function (DUF946)
Ghir_A13G013590	ovule blue	0.865846	AT5G56000
Ghir_A13G021240	ovule blue	0.921871	AT5G20190	Tetratricopeptide repeat (TPR)-like superfamily protein
Ghir_D02G019530	ovule blue	0.87568	AT4G14320	Zinc-binding ribosomal protein family protein
Ghir_D02G021260	ovule blue	0.844011	AT4G33770	Inositol 1,3,4-trisphosphate 5/6-kinase family protein
Ghir_D05G016790	ovule blue	0.807934	AT4G21580	oxidoreductase, zinc-binding dehydrogenase family protein
Ghir_D07G000640	ovule blue	0.901914	AT1G55205
Ghir_D07G016980	ovule blue	0.786559	AT5G48850	Tetratricopeptide repeat (TPR)-like superfamily protein
Ghir_D08G001060	ovule blue	0.923848
Ghir_D08G001790	ovule blue	-0.71499	AT5G13020	Emsy N Terminus (ENT)/ plant Tudor-like domains-containing protein
Ghir_D10G008560	ovule blue	0.848961	AT5G14030	translocon-associated protein beta (TRAPB) family protein
Ghir_D11G035050	ovule blue	0.729976	ATCG01110	NAD(P)H dehydrogenase subunit H
Ghir_D11G036580	ovule blue	0.871676
Ghir_D12G002180	ovule blue	-0.703636	AT1G49820	S-methyl-5-thioribose kinase
Ghir_D12G014790	ovule blue	0.675666	AT1G07400	HSP20-like chaperones superfamily protein
Ghir_D13G001750	ovule blue	0.938479	AT3G11210	SGNH hydrolase-type esterase superfamily protein
Ghir_D13G006000	ovule blue	0.742649	AT5G08370	alpha-galactosidase 2
Ghir_Scaffold3235G000020	ovule blue	0.893258
Ghir_A03G022700	ovule brown	0.976165	AT2G17200	ubiquitin family protein
Ghir_A06G011090	ovule brown	0.796287	AT3G13570	SC35-like splicing factor 30A
Ghir_A07G002780	ovule brown	0.918881	AT5G11520	aspartate aminotransferase 3
Ghir_A07G003200	ovule brown	-0.816988	AT2G24020	Uncharacterised BCR, YbaB family COG0718
Ghir_A08G001380	ovule brown	0.788225	AT3G27830	ribosomal protein L12-A
Ghir_A10G005540	ovule brown	0.93476	AT1G72970	Glucose-methanol-choline (GMC) oxidoreductase family protein
Ghir_A10G013940	ovule brown	0.778653	AT3G59420	crinkly4
Ghir_A12G018870	ovule brown	0.841687	AT4G19840	phloem protein 2-A1
Ghir_A13G003160	ovule brown	0.742058	AT2G16250	Leucine-rich repeat protein kinase family protein
Ghir_D01G001580	ovule brown	0.7804	AT3G21820
Ghir_D02G002200	ovule brown	-0.568091	AT4G15550	indole-3-acetate beta-D-glucosyltransferase
Ghir_D04G011360	ovule brown	0.921618	AT2G36460	Aldolase superfamily protein
Ghir_D05G012040	ovule brown	0.956608	AT1G80830	natural resistance-associated macrophage protein 1
Ghir_D08G021550	ovule brown	0.975785	AT2G28380	dsRNA-binding protein 2
Ghir_D09G000460	ovule brown	-0.804521
Ghir_D09G010660	ovule brown	0.928268	AT1G08470	strictosidine synthase-like 3
Ghir_D12G025120	ovule brown	0.701557	AT5G24310	ABL interactor-like protein 3
Ghir_D13G007140	ovule brown	0.89956	AT1G26120	alpha/beta-Hydrolases superfamily protein
Ghir_A04G001190	ovule green	0.702902	AT4G26830	O-Glycosyl hydrolases family 17 protein
Ghir_A05G009870	ovule green	0.725296	AT2G37570	HSP20-like chaperones superfamily protein
Ghir_A07G018170	ovule green	0.971415	AT2G17630	Pyridoxal phosphate (PLP)-dependent transferases superfamily protein
Ghir_A09G005430	ovule green	0.972094
Ghir_A09G013820	ovule green	0.926101	AT1G57660	Translation protein SH3-like family protein
Ghir_A13G001210	ovule green	0.901128	AT2G41430	dehydration-induced protein (ERD15)
Ghir_D05G023720	ovule green	0.856825	AT1G44835	YbaK/aminoacyl-tRNA synthetase-associated domain
Ghir_D05G029470	ovule green	0.961635	AT5G03730	Protein kinase superfamily protein
Ghir_D09G008710	ovule green	0.950056	AT3G27520
Ghir_D11G035340	ovule green	0.896108	AT3G52750	Tubulin/FtsZ family protein
Ghir_D11G035390	ovule green	0.879628
Ghir_A01G005710	ovule grey	0.0199493	AT1G52920	G protein coupled receptor
Ghir_A01G006790	ovule grey	0.489938	AT4G23160	cysteine-rich RLK (RECEPTOR-like protein kinase) 8
Ghir_A01G010060	ovule grey	0.257983	AT1G30845
Ghir_A01G011900	ovule grey	-0.325626
Ghir_A01G013750	ovule grey	0.84447	AT1G75010	GTP binding
Ghir_A01G019290	ovule grey	-0.240762	AT3G54750
Ghir_A01G020870	ovule grey	-0.36008	AT1G18590	sulfotransferase 17
Ghir_A02G004900	ovule grey	0.121701	AT5G07900	Mitochondrial transcription termination factor family protein
Ghir_A02G010520	ovule grey	-0.512232	AT5G41960
Ghir_A02G010860	ovule grey	-0.0108824	AT4G23850	AMP-dependent synthetase and ligase family protein
Ghir_A02G011620	ovule grey	0.645593	AT3G10250	Plant protein 1589 of unknown function
Ghir_A02G015600	ovule grey	-0.00119234	AT4G17720	RNA-binding (RRM/RBD/RNP motifs) family protein
Ghir_A02G016010	ovule grey	-0.0699206	AT5G65495
Ghir_A03G009810	ovule grey	-0.355091	ATCG00470	ATP synthase epsilon chain
Ghir_A03G018100	ovule grey	0.64625	AT3G21810	Zinc finger C-x8-C-x5-C-x3-H type family protein
Ghir_A04G002990	ovule grey	0.523207	AT1G52980	GTP-binding family protein
Ghir_A04G006070	ovule grey	-0.052953	AT2G42040
Ghir_A05G003360	ovule grey	-0.114636	AT5G20610
Ghir_A05G006750	ovule grey	0.413421	AT2G24490	replicon protein A2
Ghir_A05G007730	ovule grey	0.534521	AT1G07910	RNAligase
Ghir_A05G010990	ovule grey	-0.508963	AT1G07160	Protein phosphatase 2C family protein
Ghir_A05G012160	ovule grey	-0.0844059	AT2G25070	Protein phosphatase 2C family protein
Ghir_A05G013300	ovule grey	0.04575	AT3G16110	PDI-like 1-6
Ghir_A05G013350	ovule grey	0.150712	AT1G79850	ribosomal protein S17
Ghir_A05G022400	ovule grey	-0.0608114	AT1G09730	Cysteine proteinases superfamily protein
Ghir_A05G025390	ovule grey	0.439795	AT1G72020
Ghir_A05G033850	ovule grey	-0.602377	AT2G01140	Aldolase superfamily protein
Ghir_A06G000260	ovule grey	-0.248937	AT4G24190	Chaperone protein htpG family protein
Ghir_A06G005110	ovule grey	0.265513	AT5G35160	Endomembrane protein 70 protein family
Ghir_A06G005280	ovule grey	0.53105	AT5G25270	Ubiquitin-like superfamily protein
Ghir_A06G011540	ovule grey	0.724324	AT5G49810	methionine S-methyltransferase
Ghir_A06G013260	ovule grey	0.194589	AT1G28260	Telomerase activating protein Est1
Ghir_A06G019500	ovule grey	0.487861	AT5G36880	acetyl-CoA synthetase
Ghir_A07G001680	ovule grey	0.443937	AT1G17370	oligouridylate binding protein 1B
Ghir_A07G003430	ovule grey	0.463211	AT2G25310	Protein of unknown function (DUF2012)
Ghir_A07G003600	ovule grey	0.319218	AT2G32070	Polynucleotidyl transferase, ribonuclease H-like superfamily protein
Ghir_A07G012350	ovule grey	-0.108649	AT3G07630	arogenate dehydratase 2
Ghir_A07G017940	ovule grey	0.169153	AT2G04842	threonyl-tRNA synthetase, putative / threonine--tRNA ligase, putative
Ghir_A08G000790	ovule grey	0.346575	AT5G22770	alpha-adaptin
Ghir_A08G002220	ovule grey	0.569191	AT5G58100
Ghir_A08G002310	ovule grey	0.744696	AT2G19170	subtilisin-like serine protease 3
Ghir_A08G008130	ovule grey	0.728391	AT3G62830	NAD(P)-binding Rossmann-fold superfamily protein
Ghir_A08G008240	ovule grey	0.823613	AT1G02816	Protein of unknown function, DUF538
Ghir_A08G013370	ovule grey	0.160175	AT3G61710	AUTOPHAGY 6
Ghir_A08G013400	ovule grey	-0.040116	AT4G01050	thylakoid rhodanese-like
Ghir_A08G015920	ovule grey	-0.218877	AT4G19110	Protein kinase superfamily protein
Ghir_A08G021600	ovule grey	-0.334922	AT1G56300	Chaperone DnaJ-domain superfamily protein
Ghir_A08G023880	ovule grey	-0.336661	AT5G36170	high chlorophyll fluorescent 109
Ghir_A09G000650	ovule grey	0.424994	AT5G13340
Ghir_A09G001070	ovule grey	0.596095	AT3G29320	Glycosyl transferase, family 35
Ghir_A09G012400	ovule grey	0.673088	AT1G72040	P-loop containing nucleoside triphosphate hydrolases superfamily protein
Ghir_A09G025270	ovule grey	0.611399	AT3G16630	P-loop containing nucleoside triphosphate hydrolases superfamily protein
Ghir_A10G000680	ovule grey	0.844495	AT3G21630	chitin elicitor receptor kinase 1
Ghir_A10G001300	ovule grey	-0.18102	AT1G11480	eukaryotic translation initiation factor-related
Ghir_A10G002440	ovule grey	-0.435807	AT5G44210	erf domain protein 9
Ghir_A10G003760	ovule grey	0.0413727	AT2G34480	Ribosomal protein L18ae/LX family protein
Ghir_A10G011910	ovule grey	-0.186459	AT3G06010	Homeotic gene regulator
Ghir_A10G013730	ovule grey	-0.0411154	AT2G43160	ENTH/VHS family protein
Ghir_A10G013900	ovule grey	0.218855	AT3G59390
Ghir_A10G014040	ovule grey	-0.328976	AT3G59490
Ghir_A10G018300	ovule grey	-0.525316	AT3G10915	Reticulon family protein
Ghir_A11G003950	ovule grey	-0.605377	AT5G15740	O-fucosyltransferase family protein
Ghir_A11G004820	ovule grey	-0.0115626	AT1G75850	VPS35 homolog B
Ghir_A11G011170	ovule grey	0.264962	AT2G47070	squamosa promoter binding protein-like 1
Ghir_A11G012880	ovule grey	0.140283	AT2G48110	reduced epidermal fluorescence 4
Ghir_A11G028990	ovule grey	0.601097	AT5G27730	Protein of unknown function (DUF1624)
Ghir_A11G031840	ovule grey	0.507917	AT1G56070	Ribosomal protein S5/Elongation factor G/III/V family protein
Ghir_A12G009990	ovule grey	0.211891	AT4G39690
Ghir_A12G013150	ovule grey	0.232962	AT5G26751	shaggy-related kinase 11
Ghir_A12G015630	ovule grey	0.27942	AT2G42490	Copper amine oxidase family protein
Ghir_A12G016500	ovule grey	-0.645545	AT1G25220	anthranilate synthase beta subunit 1
Ghir_A12G019220	ovule grey	0.52966	AT5G07920	diacylglycerol kinase1
Ghir_A12G026210	ovule grey	-0.125224	AT5G24310	ABL interactor-like protein 3
Ghir_A13G007580	ovule grey	0.326107	AT1G26800	RING/U-box superfamily protein
Ghir_A13G014980	ovule grey	-0.183912	AT5G54430	Adenine nucleotide alpha hydrolases-like superfamily protein
Ghir_A13G015190	ovule grey	0.214812	AT3G15410	Leucine-rich repeat (LRR) family protein
Ghir_A13G023220	ovule grey	-0.379392	AT2G26920	Ubiquitin-associated/translation elongation factor EF1B protein
Ghir_D01G000570	ovule grey	-0.428219	AT1G10950	transmembrane nine 1
Ghir_D01G004480	ovule grey	0.898417	AT1G16970	KU70 homolog
Ghir_D01G008330	ovule grey	0.0621312	AT3G13110	serine acetyltransferase 2;2
Ghir_D01G010220	ovule grey	-0.0588265	AT1G76270	O-fucosyltransferase family protein
Ghir_D01G011130	ovule grey	-0.483138	ATCG00480	ATP synthase subunit beta
Ghir_D01G015920	ovule grey	0.838955	AT1G23030	ARM repeat superfamily protein
Ghir_D01G018800	ovule grey	-0.531312	AT1G50110	D-aminoacid aminotransferase-like PLP-dependent enzymes superfamily protein
Ghir_D01G022900	ovule grey	-0.322257	AT1G07820	Histone superfamily protein
Ghir_D01G023960	ovule grey	0.646167	AT5G01650	Tautomerase/MIF superfamily protein
Ghir_D01G024060	ovule grey	-0.625058	AT4G10320	tRNA synthetase class I (I, L, M and V) family protein
Ghir_D02G022010	ovule grey	-0.067555	AT4G34110	poly(A) binding protein 2
Ghir_D03G015180	ovule grey	-0.624708	AT5G60800	Heavy metal transport/detoxification superfamily protein
Ghir_D04G001370	ovule grey	-0.271245	AT2G40620	Basic-leucine zipper (bZIP) transcription factor family protein
Ghir_D04G002170	ovule grey	0.483937	AT5G26710	Glutamyl/glutaminyl-tRNA synthetase, class Ic
Ghir_D04G012710	ovule grey	0.141428	AT2G37380
Ghir_D05G001550	ovule grey	0.433126	AT5G20350	Ankyrin repeat family protein with DHHC zinc finger domain
Ghir_D05G003770	ovule grey	0.227197
Ghir_D05G007480	ovule grey	0.13775	AT2G26920	Ubiquitin-associated/translation elongation factor EF1B protein
Ghir_D05G012610	ovule grey	-0.30991	AT1G15420
Ghir_D05G018920	ovule grey	0.276026
Ghir_D05G026090	ovule grey	0.174929	AT1G75660	5\'-3\' exoribonuclease 3
Ghir_D05G028060	ovule grey	0.155659	AT1G71980	Protease-associated (PA) RING/U-box zinc finger family protein
Ghir_D05G028700	ovule grey	0.436213	AT5G57655	xylose isomerase family protein
Ghir_D05G029490	ovule grey	0.297594	AT4G40045
Ghir_D05G033620	ovule grey	-0.103477	AT3G23910
Ghir_D06G001600	ovule grey	-0.429252	AT5G42890	sterol carrier protein 2
Ghir_D06G004650	ovule grey	0.218197	AT1G77620	P-loop containing nucleoside triphosphate hydrolases superfamily protein
Ghir_D06G010950	ovule grey	0.469768	AT4G32160	Phox (PX) domain-containing protein
Ghir_D06G011740	ovule grey	0.487565	AT2G24520	H(+)-ATPase 5
Ghir_D06G012250	ovule grey	-0.222007	AT2G40840	disproportionating enzyme 2
Ghir_D06G015130	ovule grey	-0.00602347	AT5G45700	Haloacid dehalogenase-like hydrolase (HAD) superfamily protein
Ghir_D06G016310	ovule grey	0.570657	AT3G14075	Mono-/di-acylglycerol lipase, N-terminal;Lipase, class 3
Ghir_D06G021910	ovule grey	0.29785	AT3G14180	sequence-specific DNA binding transcription factors
Ghir_D07G003290	ovule grey	0.37008	AT4G32330	TPX2 (targeting protein for Xklp2) protein family
Ghir_D07G003630	ovule grey	-0.167565	AT4G31880
Ghir_D07G010360	ovule grey	-0.447159	AT5G59730	exocyst subunit exo70 family protein H7
Ghir_D07G013020	ovule grey	0.291964	AT4G03250	Homeodomain-like superfamily protein
Ghir_D07G015730	ovule grey	0.380578	AT2G45630	D-isomer specific 2-hydroxyacid dehydrogenase family protein
Ghir_D07G021920	ovule grey	-0.0369797	AT2G20190	CLIP-associated protein
Ghir_D08G002730	ovule grey	0.124585	AT1G51060	histone H2A 10
Ghir_D08G006300	ovule grey	0.525216	AT2G44670	Protein of unknown function (DUF581)
Ghir_D08G008290	ovule grey	0.235249	AT1G02816	Protein of unknown function, DUF538
Ghir_D08G011790	ovule grey	0.0692966	AT1G32920
Ghir_D08G011800	ovule grey	0.137394	AT1G32900	UDP-Glycosyltransferase superfamily protein
Ghir_D08G014790	ovule grey	0.68384	AT1G01730
Ghir_D08G018270	ovule grey	0.421976	AT4G17510	ubiquitin C-terminal hydrolase 3
Ghir_D08G021420	ovule grey	-0.440366	AT5G21105	Plant L-ascorbate oxidase
Ghir_D08G023220	ovule grey	0.750503	AT3G04740	RNA polymerase II transcription mediators
Ghir_D09G006930	ovule grey	-0.543124	AT4G24220	NAD(P)-binding Rossmann-fold superfamily protein
Ghir_D09G007220	ovule grey	0.677124	AT3G17430	Nucleotide-sugar transporter family protein
Ghir_D09G011070	ovule grey	0.642258	AT2G26980	CBL-interacting protein kinase 3
Ghir_D09G012170	ovule grey	-0.424078	AT3G56720
Ghir_D09G012900	ovule grey	-0.6136	AT3G57790	Pectin lyase-like superfamily protein
Ghir_D09G013420	ovule grey	0.686926	AT3G11960	Cleavage and polyadenylation specificity factor (CPSF) A subunit protein
Ghir_D09G016010	ovule grey	0.279094	AT2G28840	XB3 ortholog 1 in Arabidopsis thaliana
Ghir_D09G019750	ovule grey	0.405321	AT4G12040	A20/AN1-like zinc finger family protein
Ghir_D09G024910	ovule grey	-0.102872	AT1G13950	eukaryotic elongation factor 5A-1
Ghir_D10G000120	ovule grey	0.209593	AT1G79000	histone acetyltransferase of the CBP family 1
Ghir_D10G004410	ovule grey	0.144995	AT4G18240	starch synthase 4
Ghir_D10G004420	ovule grey	0.272331	AT2G34430	light-harvesting chlorophyll-protein complex II subunit B1
Ghir_D10G006560	ovule grey	-0.695305	AT1G55160
Ghir_D10G027700	ovule grey	-0.621838	AT3G48050	BAH domain ;TFIIS helical bundle-like domain
Ghir_D11G003360	ovule grey	0.624214	AT1G18890	calcium-dependent protein kinase 1
Ghir_D11G003910	ovule grey	-0.66181	AT5G08130	basic helix-loop-helix (bHLH) DNA-binding superfamily protein
Ghir_D11G005770	ovule grey	-0.344596	AT4G20140	Leucine-rich repeat transmembrane protein kinase
Ghir_D11G006910	ovule grey	-0.193013	ATCG00830	ribosomal protein L2
Ghir_D11G007330	ovule grey	0.359066	AT5G14720	Protein kinase superfamily protein
Ghir_D11G007360	ovule grey	-0.376391	AT5G40270	HD domain-containing metal-dependent phosphohydrolase family protein
Ghir_D11G010250	ovule grey	-0.323188	AT4G01070	UDP-Glycosyltransferase superfamily protein
Ghir_D11G018680	ovule grey	-0.049627	AT5G66230	Chalcone-flavanone isomerase family protein
Ghir_D11G020840	ovule grey	0.0935847	AT5G67230	Nucleotide-diphospho-sugar transferases superfamily protein
Ghir_D11G021100	ovule grey	-0.225118	AT2G23150	natural resistance-associated macrophage protein 3
Ghir_D11G035230	ovule grey	0.585199	AT2G36060	MMS ZWEI homologue 3
Ghir_D11G035810	ovule grey	0.658615	AT3G09880	Protein phosphatase 2A regulatory B subunit family protein
Ghir_D12G005120	ovule grey	-0.303675	AT1G30825	Arp2/3 complex, 34 kD subunit p34-Arc
Ghir_D12G005470	ovule grey	0.357216	AT5G16120	alpha/beta-Hydrolases superfamily protein
Ghir_D12G007530	ovule grey	0.226055	AT2G40980	Protein kinase superfamily protein
Ghir_D12G012670	ovule grey	0.294298	AT4G00850	GRF1-interacting factor 3
Ghir_D12G013670	ovule grey	0.175752	AT3G62420	basic region/leucine zipper motif 53
Ghir_D12G015630	ovule grey	-0.252312	AT3G18295	Protein of unknown function (DUF1639)
Ghir_D12G022170	ovule grey	0.548652	AT3G02890	RING/FYVE/PHD zinc finger superfamily protein
Ghir_D12G023250	ovule grey	-0.0432743	AT4G16510	YbaK/aminoacyl-tRNA synthetase-associated domain
Ghir_D12G023550	ovule grey	0.697464	AT1G12430	armadillo repeat kinesin 3
Ghir_D12G027400	ovule grey	0.634304	AT5G62090	SEUSS-like 2
Ghir_D13G009070	ovule grey	0.486408	AT2G03890	phosphoinositide 4-kinase gamma 7
Ghir_D13G024250	ovule grey	-0.0446476	AT2G27510	ferredoxin 3
Ghir_D13G025510	ovule grey	0.803313	AT5G58480	O-Glycosyl hydrolases family 17 protein
Ghir_Scaffold2629G000010	ovule grey	-0.448741
Ghir_A04G015870	ovule red	0.679407	AT1G69420	DHHC-type zinc finger family protein
Ghir_A05G010130	ovule red	0.989182	AT1G07820	Histone superfamily protein
Ghir_A10G016830	ovule red	0.983897	AT4G02380	senescence-associated gene 21
Ghir_A13G014750	ovule red	0.836881	AT4G05320	polyubiquitin 10
Ghir_D04G000370	ovule red	0.989112	AT3G07950	rhomboid protein-related
Ghir_D07G003170	ovule red	0.815225	AT4G30600	signal recognition particle receptor alpha subunit family protein
Ghir_D09G011440	ovule red	0.87326	AT1G51510	RNA-binding (RRM/RBD/RNP motifs) family protein
Ghir_D09G021980	ovule red	0.91541	AT2G38580	Mitochondrial ATP synthase D chain-related protein
Ghir_D10G017810	ovule red	0.993726	AT5G18660	NAD(P)-binding Rossmann-fold superfamily protein
Ghir_D12G015680	ovule red	0.991679	AT1G70330	equilibrative nucleotide transporter 1
Ghir_A01G001190	ovule turquoise	0.973902	AT1G78300	general regulatory factor 2
Ghir_A01G014190	ovule turquoise	-0.887999	AT2G01650	plant UBX domain-containing protein 2
Ghir_A02G000770	ovule turquoise	-0.716633	AT1G05690	BTB and TAZ domain protein 3
Ghir_A02G004800	ovule turquoise	0.696985	AT5G18640	alpha/beta-Hydrolases superfamily protein
Ghir_A02G007200	ovule turquoise	0.907158	AT1G76990	ACT domain repeat 3
Ghir_A04G006000	ovule turquoise	-0.872678	AT2G42140	VQ motif-containing protein
Ghir_A05G002420	ovule turquoise	0.654528	AT4G13250	NAD(P)-binding Rossmann-fold superfamily protein
Ghir_A05G006080	ovule turquoise	0.92258	AT2G24270	aldehyde dehydrogenase 11A3
Ghir_A05G041480	ovule turquoise	-0.752718	AT1G61670	Lung seven transmembrane receptor family protein
Ghir_A05G042810	ovule turquoise	0.940544	AT5G54130	Calcium-binding endonuclease/exonuclease/phosphatase family
Ghir_A05G043220	ovule turquoise	0.270924	AT1G20330	sterol methyltransferase 2
Ghir_A06G000140	ovule turquoise	-0.967482	AT1G20225	Thioredoxin superfamily protein
Ghir_A06G018870	ovule turquoise	0.688053	AT5G06100	myb domain protein 33
Ghir_A06G019880	ovule turquoise	-0.811748	AT1G61000
Ghir_A07G020020	ovule turquoise	0.956877	AT5G27260
Ghir_A07G020260	ovule turquoise	0.766187
Ghir_A08G003580	ovule turquoise	-0.865046	AT4G00090	Transducin/WD40 repeat-like superfamily protein
Ghir_A09G017620	ovule turquoise	0.956748	AT5G01620	TRICHOME BIREFRINGENCE-LIKE 35
Ghir_A10G010640	ovule turquoise	-0.83062	AT3G23920	beta-amylase 1
Ghir_A11G014210	ovule turquoise	0.919237	AT1G04090	Plant protein of unknown function (DUF946)
Ghir_A11G014480	ovule turquoise	0.819006	AT3G07030	Alba DNA/RNA-binding protein
Ghir_A11G023380	ovule turquoise	-0.842826	AT5G24010	Protein kinase superfamily protein
Ghir_A12G005070	ovule turquoise	-0.78689
Ghir_A13G006870	ovule turquoise	-0.860735	AT4G33510	3-deoxy-d-arabino-heptulosonate 7-phosphate synthase
Ghir_A13G020160	ovule turquoise	-0.721258	AT1G73430	sec34-like family protein
Ghir_D01G023880	ovule turquoise	0.731881	AT5G01590
Ghir_D03G007800	ovule turquoise	0.807175	AT5G04170	Calcium-binding EF-hand family protein
Ghir_D03G012470	ovule turquoise	0.732304	AT3G48730	glutamate-1-semialdehyde 2,1-aminomutase 2
Ghir_D03G016140	ovule turquoise	0.926417	AT2G32080	purin-rich alpha 1
Ghir_D05G007240	ovule turquoise	0.896954	AT4G36250	aldehyde dehydrogenase 3F1
Ghir_D05G012090	ovule turquoise	0.781604	AT1G15870	Mitochondrial glycoprotein family protein
Ghir_D05G021910	ovule turquoise	-0.926752	AT5G39600
Ghir_D06G000130	ovule turquoise	0.779241	AT1G75780	tubulin beta-1 chain
Ghir_D06G021830	ovule turquoise	0.886371	AT5G48930	hydroxycinnamoyl-CoA shikimate/quinate hydroxycinnamoyl transferase
Ghir_D08G003240	ovule turquoise	-0.800662	AT5G56250	hapless 8
Ghir_D08G006260	ovule turquoise	0.887463	AT2G44640
Ghir_D10G001750	ovule turquoise	0.829442	AT3G20530	Protein kinase superfamily protein
Ghir_D10G003430	ovule turquoise	-0.609143	AT2G34040	Apoptosis inhibitory protein 5 (API5)
Ghir_D12G029340	ovule turquoise	0.69068	AT5G61820
Ghir_D13G011130	ovule turquoise	-0.712386	AT5G27220	Frigida-like protein
Ghir_D13G025530	ovule turquoise	0.884641	AT2G30140	UDP-Glycosyltransferase superfamily protein
Ghir_D13G025660	ovule turquoise	0.924237	AT2G01070	Lung seven transmembrane receptor family protein
Ghir_A02G006140	ovule yellow	0.916199	AT1G48280	hydroxyproline-rich glycoprotein family protein
Ghir_A02G015490	ovule yellow	0.922014
Ghir_A04G002270	ovule yellow	0.947996	AT2G04890	SCARECROW-like 21
Ghir_A07G006130	ovule yellow	0.930738	AT4G24770	31-kDa RNA binding protein
Ghir_A08G024000	ovule yellow	0.786699	AT3G17611	RHOMBOID-like protein 14
Ghir_A12G018880	ovule yellow	0.849817	AT3G47500	cycling DOF factor 3
Ghir_A12G024510	ovule yellow	0.945093	AT4G11280	1-aminocyclopropane-1-carboxylic acid (acc) synthase 6
Ghir_D05G020530	ovule yellow	0.80051	AT4G11800	Calcineurin-like metallo-phosphoesterase superfamily protein
Ghir_D05G022870	ovule yellow	0.974062	AT5G64260	EXORDIUM like 2
Ghir_D06G020250	ovule yellow	0.777359	AT2G02990	ribonuclease 1
Ghir_D08G003000	ovule yellow	0.882262	AT4G26910	Dihydrolipoamide succinyltransferase
Ghir_D10G000250	ovule yellow	0.829667	AT1G50430	Ergosterol biosynthesis ERG4/ERG24 family
Ghir_D12G020560	ovule yellow	-0.618353	AT3G48710	DEK domain-containing chromatin associated protein
Ghir_D13G021030	ovule yellow	0.978231
Ghir_A01G020580	fiber blue	-0.746955	AT2G36930	zinc finger (C2H2 type) family protein
Ghir_A01G020830	fiber blue	-0.863801	AT5G03120
Ghir_A01G021580	fiber blue	0.757588
Ghir_A02G002720	fiber blue	0.923765	AT5G35630	glutamine synthetase 2
Ghir_A02G005970	fiber blue	0.848919	AT3G17390	S-adenosylmethionine synthetase family protein
Ghir_A02G013970	fiber blue	-0.811183	AT4G25980	Peroxidase superfamily protein
Ghir_A02G016300	fiber blue	0.948114	AT5G65700	Leucine-rich receptor-like protein kinase family protein
Ghir_A03G000450	fiber blue	0.397512	AT4G25960	P-glycoprotein 2
Ghir_A03G010340	fiber blue	0.946042	AT1G48480	receptor-like kinase 1
Ghir_A03G015450	fiber blue	-0.492132	AT1G60420	DC1 domain-containing protein
Ghir_A03G022030	fiber blue	-0.748197	AT2G21210	SAUR-like auxin-responsive protein family
Ghir_A04G004040	fiber blue	0.763437	ATCG00040
Ghir_A04G008260	fiber blue	-0.768449	AT3G01390	vacuolar membrane ATPase 10
Ghir_A04G011340	fiber blue	-0.551628	AT2G20820
Ghir_A04G012380	fiber blue	-0.50901	AT5G10360	Ribosomal protein S6e
Ghir_A05G001520	fiber blue	0.730567	AT2G10940	Bifunctional inhibitor/lipid-transfer protein/seed storage 2S albumin superfamily protein
Ghir_A05G004640	fiber blue	-0.801665
Ghir_A05G007030	fiber blue	0.827716	AT4G12320	cytochrome P450, family 706, subfamily A, polypeptide 6
Ghir_A05G007880	fiber blue	-0.588417	AT2G27030	calmodulin 5
Ghir_A05G021970	fiber blue	0.410615	AT1G50010	tubulin alpha-2 chain
Ghir_A06G008510	fiber blue	-0.676117	AT4G33180	alpha/beta-Hydrolases superfamily protein
Ghir_A06G010250	fiber blue	0.93853	AT4G30960	SOS3-interacting protein 3
Ghir_A06G016420	fiber blue	0.509143	AT1G05010	ethylene-forming enzyme
Ghir_A06G022300	fiber blue	0.953377	AT4G22360	SWIB complex BAF60b domain-containing protein
Ghir_A07G015620	fiber blue	0.98148	AT2G45290	Transketolase
Ghir_A07G022980	fiber blue	-0.741599	AT1G03900	non-intrinsic ABC protein 4
Ghir_A09G002320	fiber blue	0.927653	AT3G01280	voltage dependent anion channel 1
Ghir_A09G005920	fiber blue	0.69328	AT3G18080	B-S glucosidase 44
Ghir_A09G010110	fiber blue	-0.803626	AT5G03740	histone deacetylase 2C
Ghir_A09G023050	fiber blue	0.978937	AT3G22440	FRIGIDA-like protein
Ghir_A10G000390	fiber blue	-0.836806	AT2G35760	Uncharacterised protein family (UPF0497)
Ghir_A10G003800	fiber blue	0.962473	AT2G34510	Protein of unknown function, DUF642
Ghir_A10G015690	fiber blue	-0.90271	AT2G31090
Ghir_A10G019060	fiber blue	0.870971	AT5G07030	Eukaryotic aspartyl protease family protein
Ghir_A10G023120	fiber blue	-0.443306	AT5G05950	maternal effect embryo arrest 60
Ghir_A11G031080	fiber blue	0.950249	AT1G53050	Protein kinase superfamily protein
Ghir_A11G034610	fiber blue	0.900886	AT1G68560	alpha-xylosidase 1
Ghir_A11G035270	fiber blue	-0.944945	AT5G02280	SNARE-like superfamily protein
Ghir_A12G020700	fiber blue	-0.468289
Ghir_A12G024220	fiber blue	-0.861354	ATCG00650	ribosomal protein S18
Ghir_A12G027870	fiber blue	-0.398388	AT3G25800	protein phosphatase 2A subunit A2
Ghir_A13G016450	fiber blue	-0.863814	AT3G03070	NADH-ubiquinone oxidoreductase-related
Ghir_A13G021680	fiber blue	-0.796598	AT3G24350	syntaxin of plants 32
Ghir_D01G001650	fiber blue	-0.80026	AT4G28240	Wound-responsive family protein
Ghir_D02G000800	fiber blue	0.929332	AT3G25500	formin homology 1
Ghir_D02G006290	fiber blue	0.882425	AT3G17390	S-adenosylmethionine synthetase family protein
Ghir_D02G010240	fiber blue	0.241214	AT5G03650	starch branching enzyme 2.2
Ghir_D02G012600	fiber blue	0.821212	AT3G18000	S-adenosyl-L-methionine-dependent methyltransferases superfamily protein
Ghir_D02G015290	fiber blue	0.904597	AT1G24260	K-box region and MADS-box transcription factor family protein
Ghir_D02G022050	fiber blue	-0.776717	AT5G53390	O-acyltransferase (WSD1-like) family protein
Ghir_D03G003280	fiber blue	0.988127	AT5G65700	Leucine-rich receptor-like protein kinase family protein
Ghir_D03G018290	fiber blue	-0.797749	AT4G17670
Ghir_D04G012180	fiber blue	0.919907	AT2G37040	PHE ammonia lyase 1
Ghir_D05G003040	fiber blue	-0.562246	AT5G56670
Ghir_D05G004280	fiber blue	-0.657745	AT5G12020	17.6 kDa class II heat shock protein
Ghir_D05G012830	fiber blue	0.833252	AT3G04730	indoleacetic acid-induced protein 16
Ghir_D05G016260	fiber blue	0.977415	AT2G33850
Ghir_D05G016850	fiber blue	-0.851827	AT1G61260	Protein of unknown function (DUF761)
Ghir_D05G019650	fiber blue	0.983909	AT5G42800	dihydroflavonol 4-reductase
Ghir_D05G026730	fiber blue	-0.675101	AT4G37370	cytochrome P450, family 81, subfamily D, polypeptide 8
Ghir_D05G028150	fiber blue	-0.854605	AT1G71970
Ghir_D05G039690	fiber blue	-0.626565	AT4G26750	hydroxyproline-rich glycoprotein family protein
Ghir_D06G004570	fiber blue	-0.897754	AT1G21900	emp24/gp25L/p24 family/GOLD family protein
Ghir_D06G005320	fiber blue	-0.847149	AT2G25620	DNA-binding protein phosphatase 1
Ghir_D06G009180	fiber blue	0.796197	AT5G20510	alfin-like 5
Ghir_D07G006750	fiber blue	-0.980344	AT1G48630	receptor for activated C kinase 1B
Ghir_D07G014800	fiber blue	0.98791	AT1G01300	Eukaryotic aspartyl protease family protein
Ghir_D07G018340	fiber blue	-0.58821	AT1G04980	PDI-like 2-2
Ghir_D07G022530	fiber blue	0.888812	AT3G54560	histone H2A 11
Ghir_D08G003390	fiber blue	0.974724	AT3G20820
Ghir_D08G006950	fiber blue	0.856082	AT3G63410	S-adenosyl-L-methionine-dependent methyltransferases superfamily protein
Ghir_D08G020590	fiber blue	0.433062	AT5G42820
Ghir_D08G021430	fiber blue	0.990919	AT2G27040	Argonaute family protein
Ghir_D08G024880	fiber blue	-0.495546	AT1G17880	basic transcription factor 3
Ghir_D09G001570	fiber blue	-0.827618	AT3G28917	mini zinc finger 2
Ghir_D09G003070	fiber blue	-0.88694	AT5G04800	Ribosomal S17 family protein
Ghir_D09G015240	fiber blue	0.947547	AT2G37040	PHE ammonia lyase 1
Ghir_D09G016100	fiber blue	-0.860215	AT2G37550	ARF-GAP domain 7
Ghir_D09G022690	fiber blue	0.971688	AT4G14680	Pseudouridine synthase/archaeosine transglycosylase-like family protein
Ghir_D09G023060	fiber blue	0.926881	AT4G24000	cellulose synthase like G2
Ghir_D09G023860	fiber blue	0.874794	AT3G21510	histidine-containing phosphotransmitter 1
Ghir_D10G013670	fiber blue	-0.747186	AT3G59390
Ghir_D10G015380	fiber blue	0.913955	AT5G13930	Chalcone and stilbene synthase family protein
Ghir_D10G016990	fiber blue	0.955468	AT1G04520	plasmodesmata-located protein 2
Ghir_D10G020630	fiber blue	0.923096	AT5G07030	Eukaryotic aspartyl protease family protein
Ghir_D10G025660	fiber blue	0.907498	AT2G39870
Ghir_D11G008840	fiber blue	0.968133	AT3G60900	FASCICLIN-like arabinogalactan-protein 10
Ghir_D11G014650	fiber blue	-0.673239	AT3G07090	PPPDE putative thiol peptidase family protein
Ghir_D11G015270	fiber blue	0.97055	AT5G48480	Lactoylglutathione lyase / glyoxalase I family protein
Ghir_D11G015510	fiber blue	-0.792027
Ghir_D11G016790	fiber blue	0.958016	AT3G51550	Malectin/receptor-like protein kinase family protein
Ghir_D11G030010	fiber blue	0.965773	AT1G09460	Carbohydrate-binding X8 domain superfamily protein
Ghir_D11G031410	fiber blue	0.895092	AT1G53050	Protein kinase superfamily protein
Ghir_D12G001950	fiber blue	-0.906001
Ghir_D12G003160	fiber blue	-0.753504	AT4G34750
Ghir_D12G008930	fiber blue	-0.69688	AT5G67500	voltage dependent anion channel 2
Ghir_D12G019530	fiber blue	0.859597	AT5G07990	Cytochrome P450 superfamily protein
Ghir_D13G001220	fiber blue	-0.58686	AT5G03990
Ghir_D13G020760	fiber blue	-0.82459	AT5G26040	histone deacetylase 2
Ghir_D13G021050	fiber blue	0.882382	AT3G43190	sucrose synthase 4
Ghir_Scaffold968G000010	fiber blue	0.761248
Ghir_A01G001290	fiber brown	-0.460512	AT1G78160	pumilio 7
Ghir_A01G005740	fiber brown	-0.676006	AT4G27435	Protein of unknown function (DUF1218)
Ghir_A01G006600	fiber brown	-0.655925	AT4G05320	polyubiquitin 10
Ghir_A01G007440	fiber brown	0.855687	AT3G20310	ethylene response factor 7
Ghir_A01G014090	fiber brown	0.951576
Ghir_A01G014460	fiber brown	0.945853	AT1G70830	MLP-like protein 28
Ghir_A01G014790	fiber brown	0.430674	AT1G27970
Ghir_A01G015630	fiber brown	0.864231	AT2G21190	ER lumen protein retaining receptor family protein
Ghir_A02G002360	fiber brown	-0.94501	AT1G04910	O-fucosyltransferase family protein
Ghir_A02G010500	fiber brown	-0.68091	AT1G64640	early nodulin-like protein 8
Ghir_A03G000700	fiber brown	-0.649478	AT5G46630	Clathrin adaptor complexes medium subunit family protein
Ghir_A03G023800	fiber brown	-0.708863	AT2G30200	catalytics;transferases;[acyl-carrier-protein] S-malonyltransferases;binding
Ghir_A04G004000	fiber brown	-0.798158	ATCG01280	Chloroplast Ycf2;ATPase, AAA type, core
Ghir_A04G012360	fiber brown	0.944832	AT5G64250	Aldolase-type TIM barrel family protein
Ghir_A04G013460	fiber brown	-0.805249	AT4G34710	arginine decarboxylase 2
Ghir_A04G013550	fiber brown	0.9285	AT4G34590	G-box binding factor 6
Ghir_A05G003480	fiber brown	0.924826	AT5G20630	germin 3
Ghir_A05G008800	fiber brown	0.905376	AT2G27970	CDK-subunit 2
Ghir_A05G018520	fiber brown	0.937759	AT1G20440	cold-regulated 47
Ghir_A06G000050	fiber brown	0.950358	AT1G20430
Ghir_A06G000140	fiber brown	0.938809	AT1G20225	Thioredoxin superfamily protein
Ghir_A06G000330	fiber brown	0.902579	AT1G75780	tubulin beta-1 chain
Ghir_A06G004390	fiber brown	0.821757	AT1G77710
Ghir_A06G008300	fiber brown	0.91919	AT1G74940	Protein of unknown function (DUF581)
Ghir_A06G016080	fiber brown	-0.808348	AT4G22010	SKU5 similar 4
Ghir_A06G017660	fiber brown	0.848057	AT4G00430	plasma membrane intrinsic protein 1;4
Ghir_A07G023450	fiber brown	0.739661	AT5G40150	Peroxidase superfamily protein
Ghir_A08G009510	fiber brown	-0.846356	AT5G34940	glucuronidase 3
Ghir_A08G018180	fiber brown	0.713946	AT1G12330
Ghir_A08G023930	fiber brown	0.983034	AT1G65450	HXXXD-type acyl-transferase family protein
Ghir_A09G013820	fiber brown	-0.523673	AT1G57660	Translation protein SH3-like family protein
Ghir_A10G003760	fiber brown	0.578119	AT2G34480	Ribosomal protein L18ae/LX family protein
Ghir_A10G004710	fiber brown	-0.785412	AT1G53730	STRUBBELIG-receptor family 6
Ghir_A10G006020	fiber brown	0.841545	AT5G56670
Ghir_A10G010630	fiber brown	-0.642961	AT4G15470	Bax inhibitor-1 family protein
Ghir_A11G002610	fiber brown	0.871538	AT2G45180	Bifunctional inhibitor/lipid-transfer protein/seed storage 2S albumin superfamily protein
Ghir_A11G008180	fiber brown	-0.947187	AT3G60320	Protein of unknown function (DUF630 and DUF632)
Ghir_A11G008280	fiber brown	0.753019	AT3G60380
Ghir_A11G015620	fiber brown	0.810215	AT5G48300	ADP glucose pyrophosphorylase 1
Ghir_A11G017290	fiber brown	0.954233	AT5G16110
Ghir_A11G034930	fiber brown	0.976774	AT2G36830	gamma tonoplast intrinsic protein
Ghir_A11G035280	fiber brown	0.956623
Ghir_A12G008090	fiber brown	-0.752262	AT3G29360	UDP-glucose 6-dehydrogenase family protein
Ghir_A12G025840	fiber brown	0.922042	AT5G24580	Heavy metal transport/detoxification superfamily protein
Ghir_A12G026390	fiber brown	-0.522109	AT5G53120	spermidine synthase 3
Ghir_A13G003970	fiber brown	-0.500884	AT2G09990	Ribosomal protein S5 domain 2-like superfamily protein
Ghir_A13G004410	fiber brown	-0.784529	AT2G14820	Phototropic-responsive NPH3 family protein
Ghir_A13G008500	fiber brown	0.915929	AT2G03350	Protein of unknown function, DUF538
Ghir_A13G020570	fiber brown	0.896297
Ghir_A13G021270	fiber brown	0.930032	AT5G20230	blue-copper-binding protein
Ghir_D01G003710	fiber brown	-0.844808	AT1G78430	ROP interactive partner 2
Ghir_D02G014790	fiber brown	0.956661	AT1G70830	MLP-like protein 28
Ghir_D02G019990	fiber brown	0.71316	AT4G35410	Clathrin adaptor complex small chain family protein
Ghir_D03G005040	fiber brown	0.794315	AT3G03150
Ghir_D03G008890	fiber brown	0.622917	AT5G53300	ubiquitin-conjugating enzyme 10
Ghir_D03G011310	fiber brown	0.865055	AT5G50260	Cysteine proteinases superfamily protein
Ghir_D03G016150	fiber brown	-0.791189	AT5G19760	Mitochondrial substrate carrier family protein
Ghir_D04G009620	fiber brown	-0.455462	AT3G57990
Ghir_D05G010350	fiber brown	-0.754332	AT1G08010	GATA transcription factor 11
Ghir_D05G017500	fiber brown	0.947542	AT1G11740	ankyrin repeat family protein
Ghir_D05G023530	fiber brown	0.985917	AT1G77780	Glycosyl hydrolase superfamily protein
Ghir_D05G029280	fiber brown	-0.457342	AT5G22060	DNAJ homologue 2
Ghir_D05G038260	fiber brown	0.883561	AT5G55125	Ribosomal protein L31
Ghir_D06G006740	fiber brown	-0.955197	AT3G24550	proline extensin-like receptor kinase 1
Ghir_D06G011460	fiber brown	0.819381	AT5G10780
Ghir_D06G020780	fiber brown	-0.823811	AT5G49760	Leucine-rich repeat protein kinase family protein
Ghir_D07G002740	fiber brown	0.739965	AT5G25760	peroxin4
Ghir_D08G011470	fiber brown	0.655652	AT5G54160	O-methyltransferase 1
Ghir_D08G016730	fiber brown	0.665513	AT4G19110	Protein kinase superfamily protein
Ghir_D09G002000	fiber brown	0.858187	AT1G14340	RNA-binding (RRM/RBD/RNP motifs) family protein
Ghir_D09G006560	fiber brown	0.639951	AT3G21570
Ghir_D09G023910	fiber brown	-0.77253	AT1G54580	acyl carrier protein 2
Ghir_D10G004070	fiber brown	-0.691486	AT4G18760	receptor like protein 51
Ghir_D10G014180	fiber brown	0.499968	AT1G14780	MAC/Perforin domain-containing protein
Ghir_D11G003370	fiber brown	-0.91298	AT5G62710	Leucine-rich repeat protein kinase family protein
Ghir_D11G006540	fiber brown	-0.709085	AT5G13870	xyloglucan endotransglucosylase/hydrolase 5
Ghir_D11G012100	fiber brown	0.91357	AT4G02320	Plant invertase/pectin methylesterase inhibitor superfamily
Ghir_D11G017890	fiber brown	-0.569228	AT4G24840
Ghir_D11G021150	fiber brown	0.944623	AT2G39540
Ghir_D11G025020	fiber brown	0.951667
Ghir_D11G029880	fiber brown	0.913503	AT1G09250	basic helix-loop-helix (bHLH) DNA-binding superfamily protein
Ghir_D11G030120	fiber brown	0.854018	AT4G26480	RNA-binding KH domain-containing protein
Ghir_D11G035770	fiber brown	0.979547	AT2G36830	gamma tonoplast intrinsic protein
Ghir_D12G005680	fiber brown	-0.831084
Ghir_D12G014780	fiber brown	0.572778	AT3G22104	Phototropic-responsive NPH3 family protein
Ghir_D12G018630	fiber brown	0.738497	AT3G25600	Calcium-binding EF-hand family protein
Ghir_D12G019720	fiber brown	-0.277102	AT5G60920	COBRA-like extracellular glycosyl-phosphatidyl inositol-anchored protein family
Ghir_D12G025850	fiber brown	0.924415	AT5G24580	Heavy metal transport/detoxification superfamily protein
Ghir_D13G002990	fiber brown	0.48719	AT2G01850	endoxyloglucan transferase A3
Ghir_D13G004870	fiber brown	0.981125
Ghir_D13G007330	fiber brown	0.962111	AT1G68660	Ribosomal protein L12/ ATP-dependent Clp protease adaptor protein ClpS family protein
Ghir_D13G012920	fiber brown	0.818915	AT1G33970	P-loop containing nucleoside triphosphate hydrolases superfamily protein
Ghir_D13G025060	fiber brown	0.970488	AT5G60670	Ribosomal protein L11 family protein
Ghir_A01G001190	fiber green	-0.591491	AT1G78300	general regulatory factor 2
Ghir_A01G009210	fiber green	-0.589188	AT3G12710	DNA glycosylase superfamily protein
Ghir_A02G003890	fiber green	-0.523417	AT4G14440	3-hydroxyacyl-CoA dehydratase 1
Ghir_A02G010860	fiber green	-0.360043	AT4G23850	AMP-dependent synthetase and ligase family protein
Ghir_A02G011380	fiber green	-0.17245	AT5G17440	LUC7 related protein
Ghir_A02G016720	fiber green	-0.350898	AT3G49910	Translation protein SH3-like family protein
Ghir_A02G018960	fiber green	0.770674	AT2G27090	Protein of unknown function (DUF630 and DUF632)
Ghir_A03G003300	fiber green	-0.789336	AT5G58440	sorting nexin 2A
Ghir_A03G008190	fiber green	0.89912	AT5G08000
Ghir_A03G010930	fiber green	-0.420119	AT1G70370	polygalacturonase 2
Ghir_A03G014100	fiber green	-0.606637	AT1G67350
Ghir_A03G020010	fiber green	-0.535392	AT1G10200	GATA type zinc finger transcription factor family protein
Ghir_A03G022510	fiber green	-0.564153	AT1G29500	SAUR-like auxin-responsive protein family
Ghir_A04G002810	fiber green	0.77345	AT3G54470	uridine 5\'-monophosphate synthase / UMP synthase (PYRE-F) (UMPS)
Ghir_A04G012370	fiber green	0.454202	AT5G64260	EXORDIUM like 2
Ghir_A05G004160	fiber green	-0.192616	AT5G26180	S-adenosyl-L-methionine-dependent methyltransferases superfamily protein
Ghir_A05G005720	fiber green	-0.605885	AT5G57970	DNA glycosylase superfamily protein
Ghir_A05G005960	fiber green	0.814039	AT4G31990	aspartate aminotransferase 5
Ghir_A05G008790	fiber green	-0.484765	AT5G22870	Late embryogenesis abundant (LEA) hydroxyproline-rich glycoprotein family
Ghir_A05G013450	fiber green	0.57719	AT4G29080	phytochrome-associated protein 2
Ghir_A05G020170	fiber green	-0.566472	AT5G42655	Disease resistance-responsive (dirigent-like protein) family protein
Ghir_A05G027850	fiber green	-0.629747	AT4G09160	SEC14 cytosolic factor family protein / phosphoglyceride transfer family protein
Ghir_A05G036820	fiber green	0.377835	AT5G40580	20S proteasome beta subunit PBB2
Ghir_A05G043220	fiber green	-0.223334	AT1G20330	sterol methyltransferase 2
Ghir_A06G003220	fiber green	-0.557617	AT1G09740	Adenine nucleotide alpha hydrolases-like superfamily protein
Ghir_A06G008070	fiber green	0.761384	AT3G45310	Cysteine proteinases superfamily protein
Ghir_A06G012760	fiber green	0.734482	AT2G24580	FAD-dependent oxidoreductase family protein
Ghir_A06G014680	fiber green	-0.307396	AT1G29790	S-adenosyl-L-methionine-dependent methyltransferases superfamily protein
Ghir_A06G019930	fiber green	0.579872	AT3G15820	phosphatidic acid phosphatase-related / PAP2-related
Ghir_A06G021710	fiber green	-0.447693	AT1G28270	ralf-like 4
Ghir_A07G005720	fiber green	0.486812	AT3G48530	SNF1-related protein kinase regulatory subunit gamma 1
Ghir_A07G008050	fiber green	-0.522561	AT3G03220	expansin A13
Ghir_A07G015590	fiber green	-0.417824	AT4G00100	ribosomal protein S13A
Ghir_A07G017610	fiber green	-0.697015	AT1G04990	Zinc finger C-x8-C-x5-C-x3-H type family protein
Ghir_A07G018170	fiber green	-0.197217	AT2G17630	Pyridoxal phosphate (PLP)-dependent transferases superfamily protein
Ghir_A08G002960	fiber green	-0.477538	AT1G50640	ethylene responsive element binding factor 3
Ghir_A08G010410	fiber green	0.371716	AT4G11260	phosphatase-related
Ghir_A08G013590	fiber green	-0.194119	AT2G46170	Reticulon family protein
Ghir_A08G019390	fiber green	-0.471755	AT3G63060	EID1-like 3
Ghir_A08G026490	fiber green	-0.352395	AT5G57800	Fatty acid hydroxylase superfamily
Ghir_A09G010120	fiber green	0.709172	AT2G27830
Ghir_A09G011470	fiber green	-0.369492	AT5G03170	FASCICLIN-like arabinogalactan-protein 11
Ghir_A09G012730	fiber green	0.714586	AT3G57080	Eukaryotic rpb5 RNA polymerase subunit family protein
Ghir_A09G013310	fiber green	-0.351602
Ghir_A09G015500	fiber green	-0.280522	AT2G36880	methionine adenosyltransferase 3
Ghir_A09G018640	fiber green	-0.764155	AT4G22680	myb domain protein 85
Ghir_A09G022870	fiber green	-0.440089	AT3G05980
Ghir_A09G023760	fiber green	-0.568371	AT5G09500	Ribosomal protein S19 family protein
Ghir_A10G000360	fiber green	0.652388	AT4G16380	Heavy metal transport/detoxification superfamily protein
Ghir_A10G005730	fiber green	-0.675548	AT1G55160
Ghir_A10G006280	fiber green	-0.489767	AT1G79750	NADP-malic enzyme 4
Ghir_A10G010920	fiber green	-0.75419	AT5G35620	Eukaryotic initiation factor 4E protein
Ghir_A10G016110	fiber green	-0.236162	AT5G49800	Polyketide cyclase/dehydrase and lipid transport superfamily protein
Ghir_A10G016800	fiber green	-0.713817	AT3G06890
Ghir_A11G001160	fiber green	-0.375959	AT5G52510	SCARECROW-like 8
Ghir_A11G004820	fiber green	-0.919102	AT1G75850	VPS35 homolog B
Ghir_A11G016560	fiber green	0.880894	AT3G22200	Pyridoxal phosphate (PLP)-dependent transferases superfamily protein
Ghir_A11G016710	fiber green	0.834354	AT3G51550	Malectin/receptor-like protein kinase family protein
Ghir_A11G021990	fiber green	-0.259011	AT5G10480	Protein-tyrosine phosphatase-like, PTPLA
Ghir_A11G029870	fiber green	0.711322	AT1G09460	Carbohydrate-binding X8 domain superfamily protein
Ghir_A12G011530	fiber green	-0.305187	AT3G61550	RING/U-box superfamily protein
Ghir_A12G024510	fiber green	-0.450155	AT4G11280	1-aminocyclopropane-1-carboxylic acid (acc) synthase 6
Ghir_A12G026510	fiber green	-0.402052	AT1G64230	ubiquitin-conjugating enzyme 28
Ghir_A12G027640	fiber green	0.399786	AT2G28100	alpha-L-fucosidase 1
Ghir_A13G002650	fiber green	0.65473	AT2G01830	CHASE domain containing histidine kinase protein
Ghir_A13G005300	fiber green	0.661447	AT3G25800	protein phosphatase 2A subunit A2
Ghir_A13G006500	fiber green	-0.345179	AT4G35300	tonoplast monosaccharide transporter2
Ghir_A13G018780	fiber green	0.730063	AT1G56340	calreticulin 1a
Ghir_A13G020000	fiber green	0.768924	AT5G11920	6-&1-fructan exohydrolase
Ghir_A13G020770	fiber green	-0.883759	AT4G29190	Zinc finger C-x8-C-x5-C-x3-H type family protein
Ghir_D01G008520	fiber green	0.897759	AT5G55730	FASCICLIN-like arabinogalactan 1
Ghir_D01G010960	fiber green	0.566243	AT4G39080	vacuolar proton ATPase A3
Ghir_D01G011190	fiber green	0.602949	AT1G75390	basic leucine-zipper 44
Ghir_D01G013350	fiber green	-0.179067
Ghir_D01G022000	fiber green	0.772576	AT2G36830	gamma tonoplast intrinsic protein
Ghir_D02G002350	fiber green	-0.404436	AT4G13940	S-adenosyl-L-homocysteine hydrolase
Ghir_D02G003380	fiber green	-0.604106	AT3G23600	alpha/beta-Hydrolases superfamily protein
Ghir_D02G003960	fiber green	0.35115	AT4G14710	RmlC-like cupins superfamily protein
Ghir_D02G004190	fiber green	0.295219	AT3G23150	Signal transduction histidine kinase, hybrid-type, ethylene sensor
Ghir_D02G005300	fiber green	-0.308579	AT4G15800	ralf-like 33
Ghir_D02G008170	fiber green	-0.530398	AT1G77610	EamA-like transporter family protein
Ghir_D03G003230	fiber green	-0.501658	AT4G37830	cytochrome c oxidase-related
Ghir_D03G004360	fiber green	-0.633354	AT1G78020	Protein of unknown function (DUF581)
Ghir_D03G006640	fiber green	-0.423163	AT1G21390	embryo defective 2170
Ghir_D03G007800	fiber green	-0.49214	AT5G04170	Calcium-binding EF-hand family protein
Ghir_D03G012470	fiber green	-0.523326	AT3G48730	glutamate-1-semialdehyde 2,1-aminomutase 2
Ghir_D03G015710	fiber green	-0.849229
Ghir_D03G016140	fiber green	-0.600474	AT2G32080	purin-rich alpha 1
Ghir_D03G019160	fiber green	-0.592743	AT3G49720
Ghir_D04G000370	fiber green	-0.217729	AT3G07950	rhomboid protein-related
Ghir_D04G004030	fiber green	-0.681351	AT2G42840	protodermal factor 1
Ghir_D04G017950	fiber green	0.476924	AT4G34590	G-box binding factor 6
Ghir_D04G018430	fiber green	-0.551371	AT2G02850	plantacyanin
Ghir_D05G009460	fiber green	0.60961	AT2G39700	expansin A4
Ghir_D05G015140	fiber green	0.524227	AT1G29980	Protein of unknown function, DUF642
Ghir_D05G019950	fiber green	-0.533407	AT1G45170
Ghir_D06G007530	fiber green	-0.816027	AT5G56710	Ribosomal protein L31e family protein
Ghir_D06G010610	fiber green	0.783351	AT4G30960	SOS3-interacting protein 3
Ghir_D06G021210	fiber green	0.555884	AT5G25460	Protein of unknown function, DUF642
Ghir_D07G006390	fiber green	-0.444158	AT5G08170	porphyromonas-type peptidyl-arginine deiminase family protein
Ghir_D07G006410	fiber green	-0.722437	AT1G13580	LAG1 longevity assurance homolog 3
Ghir_D07G006540	fiber green	0.576502	AT3G58610	ketol-acid reductoisomerase
Ghir_D07G010520	fiber green	-0.66089	AT5G59300	ubiquitin carrier protein 7
Ghir_D07G015060	fiber green	-0.229243	AT3G61640	arabinogalactan protein 20
Ghir_D07G015790	fiber green	-0.886976	AT3G60820	N-terminal nucleophile aminohydrolases (Ntn hydrolases) superfamily protein
Ghir_D07G018550	fiber green	0.320775	AT2G32520	alpha/beta-Hydrolases superfamily protein
Ghir_D07G019150	fiber green	0.857216	AT5G37600	glutamine synthase clone R1
Ghir_D07G022370	fiber green	-0.396928	AT5G39570
Ghir_D08G003320	fiber green	-0.7157	AT3G20770	Ethylene insensitive 3 family protein
Ghir_D08G003410	fiber green	-0.399464	AT3G12630	A20/AN1-like zinc finger family protein
Ghir_D08G013210	fiber green	0.468472	AT1G02930	glutathione S-transferase 6
Ghir_D08G013420	fiber green	-0.310106	AT4G02080	secretion-associated RAS super family 2
Ghir_D08G013970	fiber green	0.684866	AT2G46660	cytochrome P450, family 78, subfamily A, polypeptide 6
Ghir_D08G017840	fiber green	-0.581119	AT5G47060	Protein of unknown function (DUF581)
Ghir_D08G022170	fiber green	-0.356117	AT1G09310	Protein of unknown function, DUF538
Ghir_D08G026800	fiber green	-0.843544	AT3G25270	Ribonuclease H-like superfamily protein
Ghir_D09G010660	fiber green	-0.395154	AT1G08470	strictosidine synthase-like 3
Ghir_D09G012570	fiber green	-0.660334	AT2G41770	Protein of unknown function (DUF288)
Ghir_D09G014120	fiber green	-0.51916	AT3G52590
Ghir_D10G000440	fiber green	-0.247098	AT4G21740
Ghir_D10G003840	fiber green	-0.500654	AT4G18910	NOD26-like intrinsic protein 1;2
Ghir_D10G004560	fiber green	0.859752	AT2G34510	Protein of unknown function, DUF642
Ghir_D10G010790	fiber green	-0.735632
Ghir_D10G017790	fiber green	-0.608106	AT2G39080	NAD(P)-binding Rossmann-fold superfamily protein
Ghir_D10G024010	fiber green	0.65954	AT1G17860	Kunitz family trypsin and protease inhibitor protein
Ghir_D11G004690	fiber green	-0.419735	AT5G66170	sulfurtransferase 18
Ghir_D11G004790	fiber green	-0.690523	AT2G18170	MAP kinase 7
Ghir_D11G009600	fiber green	0.627739	AT4G00430	plasma membrane intrinsic protein 1;4
Ghir_D11G011200	fiber green	-0.694176	AT1G48300
Ghir_D11G035980	fiber green	0.516427	AT2G37060	nuclear factor Y, subunit B8
Ghir_D11G036160	fiber green	0.709519	AT2G39700	expansin A4
Ghir_D12G001160	fiber green	0.472729	AT5G08410	ferredoxin/thioredoxin reductase subunit A (variable subunit) 2
Ghir_D12G009930	fiber green	-0.831344	AT4G09720	RAB GTPase homolog G3A
Ghir_D12G011750	fiber green	0.701327	AT1G01490	Heavy metal transport/detoxification superfamily protein
Ghir_D12G026270	fiber green	-0.433532	AT3G49260	IQ-domain 21
Ghir_D13G001140	fiber green	-0.871251	AT4G02510	translocon at the outer envelope membrane of chloroplasts 159
Ghir_D13G012320	fiber green	-0.555207	AT1G56330	secretion-associated RAS 1B
Ghir_D13G015110	fiber green	-0.499059	AT3G20395	RING/U-box superfamily protein
Ghir_D13G016090	fiber green	-0.457576	AT1G53160
Ghir_D13G025260	fiber green	0.413857
Ghir_D13G025400	fiber green	0.418523	AT5G58590	RAN binding protein 1
Ghir_D13G025660	fiber green	-0.55527	AT2G01070	Lung seven transmembrane receptor family protein
Ghir_Scaffold1357G000060	fiber green	-0.835859	AT2G43970	RNA-binding protein
Ghir_A01G003520	fiber turquoise	0.651677	AT1G17200	Uncharacterised protein family (UPF0497)
Ghir_A01G005860	fiber turquoise	0.79252	AT1G52855
Ghir_A01G014860	fiber turquoise	0.870273
Ghir_A01G015350	fiber turquoise	-0.791488	AT3G26340	N-terminal nucleophile aminohydrolases (Ntn hydrolases) superfamily protein
Ghir_A01G015710	fiber turquoise	0.432682	AT2G21140
Ghir_A01G016210	fiber turquoise	-0.673301	AT1G20200	PAM domain (PCI/PINT associated module) protein
Ghir_A01G019070	fiber turquoise	-0.702594	AT2G41740	villin 2
Ghir_A01G019650	fiber turquoise	0.937732	AT3G11600
Ghir_A02G000670	fiber turquoise	0.941627	AT3G03080	Zinc-binding dehydrogenase family protein
Ghir_A02G001110	fiber turquoise	0.772141	AT3G59690
Ghir_A02G002020	fiber turquoise	-0.531207	AT3G23730	xyloglucan endotransglucosylase/hydrolase 16
Ghir_A02G003390	fiber turquoise	0.797154	AT4G10250	HSP20-like chaperones superfamily protein
Ghir_A02G003900	fiber turquoise	0.457505	AT4G14420	HR-like lesion-inducing protein-related
Ghir_A02G008730	fiber turquoise	0.962009	AT1G49890	Family of unknown function (DUF566)
Ghir_A02G009240	fiber turquoise	0.744588	AT3G54200	Late embryogenesis abundant (LEA) hydroxyproline-rich glycoprotein family
Ghir_A02G012100	fiber turquoise	0.972838	AT1G21390	embryo defective 2170
Ghir_A02G014820	fiber turquoise	0.95571	AT1G15100	RING-H2 finger A2A
Ghir_A03G003500	fiber turquoise	0.559534	AT3G11110	RING/U-box superfamily protein
Ghir_A03G006960	fiber turquoise	0.393007	AT5G51400	PLAC8 family protein
Ghir_A03G010030	fiber turquoise	0.966618	AT1G17100	SOUL heme-binding family protein
Ghir_A03G012560	fiber turquoise	0.851018	AT1G14720	xyloglucan endotransglucosylase/hydrolase 28
Ghir_A03G015080	fiber turquoise	0.794738	AT3G26510
Ghir_A03G020180	fiber turquoise	0.870142	AT2G23090	Uncharacterised protein family SERF
Ghir_A03G020290	fiber turquoise	0.575168	AT2G18990	thioredoxin domain-containing protein 9 homolog
Ghir_A03G022230	fiber turquoise	0.913872	AT2G16700	actin depolymerizing factor 5
Ghir_A03G022250	fiber turquoise	0.358883	AT3G51260
Ghir_A04G010270	fiber turquoise	0.987163
Ghir_A04G012800	fiber turquoise	0.902778	AT1G50010	tubulin alpha-2 chain
Ghir_A04G015460	fiber turquoise	0.91308	AT1G70670	Caleosin-related family protein
Ghir_A05G002330	fiber turquoise	0.694031	AT3G24503	aldehyde dehydrogenase 2C4
Ghir_A05G003260	fiber turquoise	0.792537	AT4G33080	AGC (cAMP-dependent, cGMP-dependent and protein kinase C) kinase family protein
Ghir_A05G013310	fiber turquoise	-0.863	AT1G79870	D-isomer specific 2-hydroxyacid dehydrogenase family protein
Ghir_A05G013990	fiber turquoise	0.665028	AT5G56890	Protein kinase superfamily protein
Ghir_A05G016540	fiber turquoise	0.894062	AT5G49800	Polyketide cyclase/dehydrase and lipid transport superfamily protein
Ghir_A05G017040	fiber turquoise	0.922564	AT1G61260	Protein of unknown function (DUF761)
Ghir_A05G025870	fiber turquoise	-0.933205	AT1G76160	SKU5 similar 5
Ghir_A05G028400	fiber turquoise	0.957636	AT2G40610	expansin A8
Ghir_A05G030460	fiber turquoise	-0.895522	AT3G54770	RNA-binding (RRM/RBD/RNP motifs) family protein
Ghir_A05G036010	fiber turquoise	0.812301	AT3G11340	UDP-Glycosyltransferase superfamily protein
Ghir_A05G037810	fiber turquoise	0.863009	AT4G31130	Protein of unknown function (DUF1218)
Ghir_A05G042070	fiber turquoise	-0.908801	AT5G17050	UDP-glucosyl transferase 78D2
Ghir_A06G004130	fiber turquoise	0.843021
Ghir_A06G004970	fiber turquoise	0.760686	AT5G11440	CTC-interacting domain 5
Ghir_A06G005040	fiber turquoise	0.668019	AT2G25680	molybdate transporter 1
Ghir_A06G005550	fiber turquoise	0.924461	AT5G20260	Exostosin family protein
Ghir_A06G006210	fiber turquoise	-0.967882	AT2G26730	Leucine-rich repeat protein kinase family protein
Ghir_A06G009130	fiber turquoise	0.646409	AT3G13920	eukaryotic translation initiation factor 4A1
Ghir_A06G013350	fiber turquoise	0.320268	AT1G28290	arabinogalactan protein 31
Ghir_A06G018090	fiber turquoise	-0.917118	AT5G04530	3-ketoacyl-CoA synthase 19
Ghir_A06G019370	fiber turquoise	-0.881882	AT2G40590	Ribosomal protein S26e family protein
Ghir_A06G019660	fiber turquoise	-0.674286	AT5G49760	Leucine-rich repeat protein kinase family protein
Ghir_A06G020330	fiber turquoise	-0.947608	AT4G32890	GATA transcription factor 9
Ghir_A06G020920	fiber turquoise	0.469487	AT1G16180	Serinc-domain containing serine and sphingolipid biosynthesis protein
Ghir_A07G000200	fiber turquoise	0.438052	AT4G17486	PPPDE putative thiol peptidase family protein
Ghir_A07G002590	fiber turquoise	0.873772	AT5G25880	NADP-malic enzyme 3
Ghir_A07G013600	fiber turquoise	0.675979	AT1G02640	beta-xylosidase 2
Ghir_A07G017890	fiber turquoise	0.645543	AT2G04780	FASCICLIN-like arabinoogalactan 7
Ghir_A07G018050	fiber turquoise	0.872303	AT5G35740	Carbohydrate-binding X8 domain superfamily protein
Ghir_A07G018840	fiber turquoise	-0.938317	AT1G48480	receptor-like kinase 1
Ghir_A08G005490	fiber turquoise	0.474171	AT2G04780	FASCICLIN-like arabinoogalactan 7
Ghir_A08G008110	fiber turquoise	0.728894	AT4G02425
Ghir_A08G010030	fiber turquoise	-0.261549	AT5G24165
Ghir_A08G011130	fiber turquoise	-0.948265	AT1G64390	glycosyl hydrolase 9C2
Ghir_A08G011400	fiber turquoise	0.870839	AT2G46500	phosphoinositide 4-kinase gamma 4
Ghir_A08G015920	fiber turquoise	0.450898	AT4G19110	Protein kinase superfamily protein
Ghir_A08G023780	fiber turquoise	0.369758	AT3G49910	Translation protein SH3-like family protein
Ghir_A09G014430	fiber turquoise	-0.19645	AT3G52500	Eukaryotic aspartyl protease family protein
Ghir_A09G014520	fiber turquoise	0.921884	AT1G52340	NAD(P)-binding Rossmann-fold superfamily protein
Ghir_A09G015850	fiber turquoise	0.95174	AT5G03230	Protein of unknown function, DUF584
Ghir_A09G016580	fiber turquoise	-0.710784	AT5G02500	heat shock cognate protein 70-1
Ghir_A09G018480	fiber turquoise	0.746898
Ghir_A09G022980	fiber turquoise	0.830068	AT2G32120	heat-shock protein 70T-2
Ghir_A09G023340	fiber turquoise	0.92816	AT5G43850	RmlC-like cupins superfamily protein
Ghir_A09G025200	fiber turquoise	0.882941	AT5G49120	Protein of unknown function (DUF581)
Ghir_A10G006760	fiber turquoise	-0.866644	AT5G41040	HXXXD-type acyl-transferase family protein
Ghir_A10G012950	fiber turquoise	-0.903649	AT4G13940	S-adenosyl-L-homocysteine hydrolase
Ghir_A10G018310	fiber turquoise	0.907264	AT2G40600	appr-1-p processing enzyme family protein
Ghir_A10G022330	fiber turquoise	0.931962	AT3G55420
Ghir_A11G006910	fiber turquoise	0.892362	AT5G46860	Syntaxin/t-SNARE family protein
Ghir_A11G009680	fiber turquoise	-0.235207	AT2G45980
Ghir_A11G015090	fiber turquoise	0.652223	AT3G25290	Auxin-responsive family protein
Ghir_A11G015190	fiber turquoise	-0.206005	AT5G48480	Lactoylglutathione lyase / glyoxalase I family protein
Ghir_A11G028070	fiber turquoise	0.934351	AT5G18170	glutamate dehydrogenase 1
Ghir_A12G007580	fiber turquoise	0.708958	AT5G67070	ralf-like 34
Ghir_A12G015100	fiber turquoise	0.460176	AT1G03870	FASCICLIN-like arabinoogalactan 9
Ghir_A12G025280	fiber turquoise	0.541979	AT5G41940	Ypt/Rab-GAP domain of gyp1p superfamily protein
Ghir_A12G025790	fiber turquoise	0.84905	AT5G24600	Protein of unknown function, DUF599
Ghir_A12G026880	fiber turquoise	-0.504998	AT5G52552	conserved peptide upstream open reading frame 14
Ghir_A12G028630	fiber turquoise	0.957317	AT3G48000	aldehyde dehydrogenase 2B4
Ghir_A13G000740	fiber turquoise	0.984409	AT5G04830	Nuclear transport factor 2 (NTF2) family protein
Ghir_A13G010440	fiber turquoise	-0.165732
Ghir_A13G010640	fiber turquoise	0.885087	AT1G08570	atypical CYS HIS rich thioredoxin 4
Ghir_A13G017780	fiber turquoise	-0.798971	AT3G04470	Ankyrin repeat family protein
Ghir_A13G019040	fiber turquoise	0.512152	AT3G05890	Low temperature and salt responsive protein family
Ghir_A13G024600	fiber turquoise	0.453498	AT1G10460	germin-like protein 7
Ghir_A13G024720	fiber turquoise	0.976832	AT1G16030	heat shock protein 70B
Ghir_D01G006020	fiber turquoise	0.304364	AT4G27430	COP1-interacting protein 7
Ghir_D01G006890	fiber turquoise	0.815129	AT4G05320	polyubiquitin 10
Ghir_D01G008620	fiber turquoise	0.742045	AT5G55850	RPM1-interacting protein 4 (RIN4) family protein
Ghir_D01G008730	fiber turquoise	-0.647315	AT4G26600	S-adenosyl-L-methionine-dependent methyltransferases superfamily protein
Ghir_D01G010250	fiber turquoise	0.907929	AT5G42290	transcription activator-related
Ghir_D01G021680	fiber turquoise	0.880579	AT2G27770	Plant protein of unknown function (DUF868)
Ghir_D02G003770	fiber turquoise	0.51472	AT4G10250	HSP20-like chaperones superfamily protein
Ghir_D02G012190	fiber turquoise	0.970498	AT1G17100	SOUL heme-binding family protein
Ghir_D02G021350	fiber turquoise	0.941485	AT4G33800
Ghir_D02G021550	fiber turquoise	0.910172	AT3G49940	LOB domain-containing protein 38
Ghir_D02G021670	fiber turquoise	0.870547
Ghir_D03G003010	fiber turquoise	0.924364	AT5G67620
Ghir_D03G008540	fiber turquoise	0.848378	AT5G41560
Ghir_D03G008620	fiber turquoise	0.967447	AT1G64065	Late embryogenesis abundant (LEA) hydroxyproline-rich glycoprotein family
Ghir_D03G009030	fiber turquoise	-0.963174	AT1G64390	glycosyl hydrolase 9C2
Ghir_D03G018120	fiber turquoise	-0.610191	AT4G17560	Ribosomal protein L19 family protein
Ghir_D03G019290	fiber turquoise	-0.933018	AT4G25960	P-glycoprotein 2
Ghir_D04G000360	fiber turquoise	0.735289	AT3G20060	ubiquitin-conjugating enzyme19
Ghir_D04G009900	fiber turquoise	0.768661	AT3G11660	NDR1/HIN1-like 1
Ghir_D04G011980	fiber turquoise	0.473826	AT5G03460
Ghir_D04G016230	fiber turquoise	0.891037	AT5G63670	SPT4 homolog 2
Ghir_D04G016710	fiber turquoise	0.653508	AT5G09400	K+ uptake permease 7
Ghir_D04G019790	fiber turquoise	0.75997	AT3G26340	N-terminal nucleophile aminohydrolases (Ntn hydrolases) superfamily protein
Ghir_D04G019890	fiber turquoise	0.928983	AT5G43260	chaperone protein dnaJ-related
Ghir_D04G019930	fiber turquoise	0.583357	AT1G27950	glycosylphosphatidylinositol-anchored lipid protein transfer 1
Ghir_D05G000740	fiber turquoise	0.973452	AT4G25830	Uncharacterised protein family (UPF0497)
Ghir_D05G002830	fiber turquoise	-0.95813	AT4G29140	MATE efflux family protein
Ghir_D05G003260	fiber turquoise	-0.497963	AT2G19480	nucleosome assembly protein 1;2
Ghir_D05G004700	fiber turquoise	-0.853044	AT5G26010	Protein phosphatase 2C family protein
Ghir_D05G006440	fiber turquoise	-0.626406	AT2G24800	Peroxidase superfamily protein
Ghir_D05G008420	fiber turquoise	-0.719109	AT5G22440	Ribosomal protein L1p/L10e family
Ghir_D05G009360	fiber turquoise	0.832803	AT1G07400	HSP20-like chaperones superfamily protein
Ghir_D05G012570	fiber turquoise	0.949755	AT3G15630
Ghir_D05G012970	fiber turquoise	0.948458	AT1G79910	Regulator of Vps4 activity in the MVB pathway protein
Ghir_D05G013430	fiber turquoise	-0.743262	AT1G14520	myo-inositol oxygenase 1
Ghir_D05G017830	fiber turquoise	0.929386	AT4G04020	fibrillin
Ghir_D05G018450	fiber turquoise	-0.894403	AT4G35230	BR-signaling kinase 1
Ghir_D05G019920	fiber turquoise	0.765653	AT4G36660	Protein of unknown function (DUF1195)
Ghir_D05G022590	fiber turquoise	0.862705	AT1G28220	purine permease 3
Ghir_D05G025130	fiber turquoise	0.834739	AT3G27950	GDSL-like Lipase/Acylhydrolase superfamily protein
Ghir_D05G025880	fiber turquoise	-0.959841	AT1G76160	SKU5 similar 5
Ghir_D05G036580	fiber turquoise	0.965024	AT4G27470	RING membrane-anchor 3
Ghir_D05G037800	fiber turquoise	0.780884	AT3G20395	RING/U-box superfamily protein
Ghir_D05G038320	fiber turquoise	0.639113	AT5G55180
Ghir_D06G001600	fiber turquoise	0.470025	AT5G42890	sterol carrier protein 2
Ghir_D06G009240	fiber turquoise	0.783608	AT5G12020	17.6 kDa class II heat shock protein
Ghir_D06G010670	fiber turquoise	-0.916893	AT2G24230	Leucine-rich repeat protein kinase family protein
Ghir_D06G012460	fiber turquoise	-0.88357	AT1G71695	Peroxidase superfamily protein
Ghir_D06G013880	fiber turquoise	0.720907	AT4G21620	glycine-rich protein
Ghir_D06G014900	fiber turquoise	0.934707	AT1G29195
Ghir_D06G016650	fiber turquoise	-0.93115	AT1G11600	cytochrome P450, family 77, subfamily B, polypeptide 1
Ghir_D06G019950	fiber turquoise	-0.88887
Ghir_D07G001720	fiber turquoise	0.845615	AT1G74940	Protein of unknown function (DUF581)
Ghir_D07G002390	fiber turquoise	-0.121014	AT5G11770	NADH-ubiquinone oxidoreductase 20 kDa subunit, mitochondrial
Ghir_D07G003650	fiber turquoise	0.836867	AT5G10930	CBL-interacting protein kinase 5
Ghir_D07G006520	fiber turquoise	0.564536	AT2G03810	18S pre-ribosomal assembly protein gar2-related
Ghir_D07G011850	fiber turquoise	0.897749	AT5G22390	Protein of unknown function (DUF3049)
Ghir_D07G014670	fiber turquoise	-0.92903	AT1G01225	NC domain-containing protein-related
Ghir_D07G021460	fiber turquoise	0.842138	AT1G05810	RAB GTPase homolog A5E
Ghir_D07G023560	fiber turquoise	-0.871977	AT5G14920	Gibberellin-regulated family protein
Ghir_D07G024480	fiber turquoise	0.917539	AT3G01820	P-loop containing nucleoside triphosphate hydrolases superfamily protein
Ghir_D08G006410	fiber turquoise	-0.409803	AT1G02140	mago nashi family protein
Ghir_D08G007550	fiber turquoise	0.818608	AT2G48150	glutathione peroxidase 4
Ghir_D08G016630	fiber turquoise	-0.789452	AT2G35605
Ghir_D08G016970	fiber turquoise	0.925822
Ghir_D08G017860	fiber turquoise	0.723182	AT5G47070	Protein kinase superfamily protein
Ghir_D08G025580	fiber turquoise	0.444175	AT3G14940	phosphoenolpyruvate carboxylase 3
Ghir_D10G001130	fiber turquoise	0.848464	AT2G35760	Uncharacterised protein family (UPF0497)
Ghir_D10G005130	fiber turquoise	0.716433	AT1G31260	zinc transporter 10 precursor
Ghir_D10G006670	fiber turquoise	0.967416	AT1G17710	Pyridoxal phosphate phosphatase-related protein
Ghir_D10G010730	fiber turquoise	-0.603458	AT5G65360
Ghir_D10G019280	fiber turquoise	0.935007	AT1G47960	cell wall / vacuolar inhibitor of fructosidase 1
Ghir_D10G020540	fiber turquoise	-0.936223	AT1G49320	unknown seed protein like 1
Ghir_D10G021730	fiber turquoise	-0.886066	AT5G06390	FASCICLIN-like arabinogalactan protein 17 precursor
Ghir_D10G024470	fiber turquoise	0.977014	AT3G55420
Ghir_D10G026600	fiber turquoise	-0.589078	AT3G56110	prenylated RAB acceptor 1.B1
Ghir_D10G027000	fiber turquoise	-0.544067
Ghir_D11G009630	fiber turquoise	-0.855437	AT2G45970	cytochrome P450, family 86, subfamily A, polypeptide 8
Ghir_D11G011000	fiber turquoise	0.917225	AT4G01575	serine protease inhibitor, Kazal-type family protein
Ghir_D11G011270	fiber turquoise	0.879117	AT3G62100	indole-3-acetic acid inducible 30
Ghir_D11G017790	fiber turquoise	-0.684647	AT5G38760	Late embryogenesis abundant protein (LEA) family protein
Ghir_D11G024300	fiber turquoise	0.804232	AT5G02280	SNARE-like superfamily protein
Ghir_D11G025480	fiber turquoise	0.749561	AT5G20950	Glycosyl hydrolase family protein
Ghir_D11G033830	fiber turquoise	0.746512	AT1G31812	acyl-CoA-binding protein 6
Ghir_D11G036790	fiber turquoise	-0.897254	AT5G06150	Cyclin family protein
Ghir_D12G001080	fiber turquoise	0.780169	AT3G62730
Ghir_D12G009210	fiber turquoise	-0.94391	AT4G37370	cytochrome P450, family 81, subfamily D, polypeptide 8
Ghir_D12G012760	fiber turquoise	0.948519
Ghir_D12G013170	fiber turquoise	-0.889858	AT3G62110	Pectin lyase-like superfamily protein
Ghir_D12G026070	fiber turquoise	0.958001	AT5G53560	cytochrome B5 isoform E
Ghir_D13G004060	fiber turquoise	0.991643	AT4G33985	Protein of unknown function (DUF1685)
Ghir_D13G008740	fiber turquoise	-0.381159	AT1G13700	6-phosphogluconolactonase 1
Ghir_D13G013800	fiber turquoise	-0.785913	AT1G79560	FTSH protease 12
Ghir_D13G019760	fiber turquoise	0.937562	AT3G05890	Low temperature and salt responsive protein family
Ghir_D13G020210	fiber turquoise	0.825232	AT5G11150	vesicle-associated membrane protein 713
