# Supplementary material for: Co-expression network and comparative transcriptome analysis for fiber initiation and elongation reveal genetic differences in two lines from upland cotton CCRI70 RIL population
Source: PeerJ. 2021 Jul 21;9:e11812. doi: 10.7717/peerj.11812 (PMC8308610; doi:10.7717/peerj.11812)
Supplement: Supplemental Information 13 [file peerj-09-11812-s013.xlsx]

## Sheet: Sheet1
Table S13. Primers in Expression Pattern Validation
Gene Name	Forward Primer （5'-3'）	Reverse Primer （5'-3'）
Ghir_A01G001190	TCGTTGCTCCCGACGAACTTAC	CGATCTTGGCCCTGTACTCACG
Ghir_A01G010000	AGCAATGGTTGCAGCACTGTGA	ATCGATATTGCCACCGGAGCTG
Ghir_A02G001110	ACCACTCAAAGACGACGACAGC	GTTCCCAGGTGTCCCCATGAAC
Ghir_A02G002020	TGTACCGTTCCCCAAGAGCC	TCCTGGTGCATCAAGTTCGTTT
Ghir_A03G022510	TGGAGAAGGGTCACTTTGTGGTG	TGTTGGCGTGTTTCTTGCTGA
Ghir_A03G022700	GATTCGAGTGAGTCACGACCCG	TGTACCGTTCGAGCAGCGGATA
Ghir_A04G002270	GCTCTTGCTGTCAACTTTCCGC	CAGGCAGTGCTGCTCGACATTA
Ghir_A05G006080	AAATTGCTCCTGCGCTCATTGC	ACCATGTGAAGTGCAGCTACGG
Ghir_A05G020170	TTCATCAAAGAACCCTTCCAGA	TGAGGGCACGGTGAAAGAC
Ghir_A05G042810	CAATTATGCTTTGCGGAGACTGG	ATGTTTCCCCGATGATTGAGGT
Ghir_A06G019930	GCGGCGTGGTTCTTGTTTTTCA	AGCAGAAATTGTCGCCCTTGGT
Ghir_A07G015620	TCTATCCCTCGCGCTTCCTCTT	CGCCTTCTCGACCGCATCAATA
Ghir_A07G020020	GATGAGCATAGGCAGCTTGTTGTT	TTGCGTAGATGGCAGTAAGTTGGT
Ghir_A08G021080	CGTGAAGGTCCATTGTCAGGCA	ATGACAGTGACTTCCAGTGCGG
Ghir_A08G023930	GTAACTCGGCCGGAATCGGTTT	CCCATTGCAAATCCACCGCATC
Ghir_A09G017620	GGCTGAGCCTGGTACAGAATCG	GGTCCGACATGTAGGGGCAATC
Ghir_A11G031900	TCCATCCCTTTCACATACCGCT	CGGTTGGTTCGATCAGGACTGG
Ghir_A11G034930	CGCCGTCGTTTTTGAGATCGTG	TGCGATCACTCCTAGGTCTCCC
Ghir_A12G024510	CTTTGGACTGGTGTCCTCGCAA	TCGCCACAAGTCCATTTCAGCA
Ghir_A13G020210	GCACCCGATCCTTGTACCCTTG	GCATTTCGTTCTCCAAGGCACG
Ghir_D01G001580	CTTCCGCGTTGAAAACGAGTGG	AATCAGTTTCGGCAAACACGCC
Ghir_D01G004480	AATGCCCTCTGGGTTGCTCAAG	GCAGCATCCTGGAGACTTCCAA
Ghir_D03G003280	GGAACTCGTTCGTTTTGACGCC	ACGTGTCGAGCTTCTGCAACTT
Ghir_D03G003390	AAGTTGATGGAAAGCCCGGTCC	CTTCAACCGGCTCTCACTCAGG
Ghir_D05G003750	GATGGATTGGCACCTGAGACTTT	TCTTCCCACAGAACCACGCTTT
Ghir_D05G012040	AATCACTGGGAGCTTGTGGCAG	TGATGTGTTGCCTGCATCGTCA
Ghir_D05G014410	ACCGACCCTAACCAAAACACGG	CCTCCCCATTTCACTCTCGCAG
Ghir_D05G019650	GCGACCCTGACAACTCGAAGAA	GACTCGAAGTCCATAGGCGTGG
Ghir_D05G019950	GGCAGATACACCAATGACAAGAGC	GGCAAGAGTCAAACCGTTCAGG
Ghir_D05G022870	CTCTCTCAGCAACCCCAAGACG	CGCCACGTCAGAGGAAGTCAAA
Ghir_D05G023530	TTTGGGTTAGGCACGACGAAGG	GGTCGAGGTGAACAAGGCGTAA
Ghir_D07G014800	TGGAGAGTACTTCACGCGCCTA	AAACCACGTCGCTACCAGTGTC
Ghir_D08G011800	GGGACCATCAAGGTTGTGGGAG	TTCCTTGGCAAGAGGAGCAACC
Ghir_D08G021430	AGGGATGGAGTTAGCGAGTCACA	CTATAACGGTTCCAGGCGGGAC
Ghir_D08G021550	GATCAGGCCTTGGGCATCTACC	GCAGTGGAGGAGTTCGCCATAG
Ghir_D11G004790	GGGGTCGTTTGCTCATCCATCA	ACGCATCAACACGATTGTCGAA
Ghir_D11G035770	CACTCAGAGCAGCTTTGGCTGA	ATTGACGTGACCGCCGGATATG
Ghir_D13G001750	TCACGACGTGCCATACAGGTTC	CCCATCGAGTCATTACCGCCAA
Ghir_D13G004870	TGGCAGTGGGATACATGGTGTG	CCTCAGCTGCAGGATGTCCTAT
Ghir_D13G021030	TTCCTTCTTAGGGTTTTTCAGTTTT	ATCTGAAATCCTAGAATTGGAGCTC
βantin	CACTGGTGTGATGGTTGGTA	CTGGATAGCAACATACATAGCC
