# Supplementary material for: Co-expression network and comparative transcriptome analysis for fiber initiation and elongation reveal genetic differences in two lines from upland cotton CCRI70 RIL population
Source: PeerJ. 2021 Jul 21;9:e11812. doi: 10.7717/peerj.11812 (PMC8308610; doi:10.7717/peerj.11812)
Supplement: Supplemental Information 14 [file peerj-09-11812-s014.xlsx]

## Sheet: Sheet1
Table S14. qPCR of Expression Pattern Validation
Stage	Gene ID	L1-Ct1	L1-Ct2	L1-Ct3	L2-Ct1	L2-Ct2	L2-Ct3	Ref	L1-Ct1	L1-Ct2	L1-Ct3	L2-Ct1	L2-Ct2	L2-Ct3
0DPA	Ghir_D13G021030	24.88	24.8	24.95	24.14	24.27	24.3	Ref	24.4	24.4	24.58	24.94	24.91	24.86
	Ghir_D05G022870	29.52	29.55	29.43	28.33	28.21	28.45	Ref	24.4	24.4	24.58	24.94	24.91	24.86
	Ghir_A12G024510	25.28	25.31	25.3	24.22	23.94	23.65	Ref	22.75	22.87	22.55	22.89	22.92	22.97
	Ghir_A03G022700	24.52	24.74	24.75	24.5	24.24	23.97	Ref	22.75	22.87	22.55	22.89	22.92	22.97
	Ghir_D08G021550	25	25.12	24.89	24.68	24.54	24.26	Ref	24.4	24.4	24.58	24.94	24.91	24.86
	Ghir_D05G012040	28.35	28.52	28.42	27.62	27.46	27.57	Ref	22.75	22.87	22.55	22.89	22.92	22.97
	Ghir_A04G002270	26.89	27.27	27.28	25.74	25.68	25.82	Ref	22.75	22.87	22.55	22.89	22.92	22.97
	Ghir_A01G001190	26.63	26.8	26.43	25.65	25.81	25.78	Ref	22.75	22.87	22.55	22.89	22.92	22.97
	Ghir_A07G020020	24.35	24.38	24.28	22.76	23.26	22.8	Ref	22.75	22.87	22.55	22.89	22.92	22.97
	Ghir_A09G017620	28.87	28.77	28.72	27.52	27.35	27.44	Ref	22.75	22.87	22.55	22.89	22.92	22.97
	Ghir_A05G042810	34.17	34.33	34.26	32.5	32.47	32.39	Ref	24.4	24.4	24.58	24.94	24.91	24.86
	Ghir_A08G021080	25.83	25.57	25.8	27.32	27.27	27.45	Ref	22.75	22.87	22.55	22.89	22.92	22.97
	Ghir_A06G019930	24.91	24.72	24.75	25.8	25.69	25.91	Ref	22.75	22.87	22.55	22.89	22.92	22.97
	Ghir_A11G031900	29.34	28.99	29	33.5	33.62	33.46	Ref	22.75	22.87	22.55	22.89	22.92	22.97
	Ghir_D13G001750	26.33	26.24	26.45	27.69	27.56	27.58	Ref	24.4	24.4	24.58	24.94	24.91	24.86
	Ghir_A05G006080	28.36	28.37	28.32	26.69	26.9	26.59	Ref	22.75	22.87	22.55	22.89	22.92	22.97
	Ghir_D08G011800	26.11	26	25.93	25.24	25.71	25.3	Ref	24.4	24.4	24.58	24.94	24.91	24.86
	Ghir_D01G001580	34.58	34.6	34.78	32.8	32.94	32.83	Ref	24.4	24.4	24.58	24.94	24.91	24.86
	Ghir_D01G004480	26.6	26.54	26.64	26.28	26.21	26.2	Ref	24.4	24.4	24.58	24.94	24.91	24.86
5DPA	Ghir_D08G021430	23.87	23.57	23.58	25.54	25.4	25.43	Ref	23.61	23.49	23.54	22.84	22.86	22.84
	Ghir_D03G003280	24.79	24.64	24.68	25.3	25.31	25.45	Ref	23.61	23.49	23.54	22.84	22.86	22.84
	Ghir_D07G014800	27.91	27.68	27.8	28.31	28.3	28.32	Ref	23.61	23.49	23.54	22.84	22.86	22.84
	Ghir_D05G019650	19.66	19.4	19.37	20.4	20.47	20.3	Ref	23.61	23.49	23.54	22.84	22.86	22.84
	Ghir_A07G015620	23.88	24.23	24.29	24.4	24.29	24.5	Ref	23.61	23.49	23.54	22.84	22.86	22.84
	Ghir_D05G019950	24.75	24.89	24.7	23.36	23.56	23.54	Ref	23.61	23.49	23.54	22.84	22.86	22.84
	Ghir_A03G022510	30.45	30.6	30.67	24.47	24.6	24.75	Ref	23.61	23.49	23.54	22.84	22.86	22.84
	Ghir_A05G020170	22.65	23.1	22.74	18.98	19.21	19.35	Ref	24.21	23.85	23.8	23.21	22.59	22.85
	Ghir_D11G004790	24.33	24.01	23.89	22.05	21.79	21.83	Ref	24.21	23.85	23.8	23.21	22.59	22.85
	Ghir_D05G014410	30.74	30.97	30.94	32.43	31.82	31.78	Ref	23.61	23.49	23.54	22.84	22.86	22.84
	Ghir_A13G020210	22.41	22.61	22.4	22.7	22.76	22.77	Ref	23.61	23.49	23.54	22.84	22.86	22.84
	Ghir_A01G010000	26.67	26.8	26.7	27.57	27.6	27.7	Ref	23.61	23.49	23.54	22.84	22.86	22.84
	Ghir_D03G003390	23.56	23.49	23.36	23.68	23.39	23.53	Ref	23.61	23.49	23.54	22.84	22.86	22.84
	Ghir_D05G003750	24.51	24.83	24.8	24.62	24.63	24.66	Ref	23.61	23.49	23.54	22.84	22.86	22.84
	Ghir_A02G001110	33.56	33.73	33.38	31.71	31.86	31.57	Ref	23.61	23.49	23.54	22.84	22.86	22.84
10DPA	Ghir_A02G002020	23.55	23.85	23.8	24.95	24.78	24.92	Ref	19.93	19.75	19.71	20.22	20.3	20.33
	Ghir_D05G023530	21.58	21.95	21.69	27.55	27.66	27.28	Ref	19.93	19.75	19.71	20.22	20.3	20.33
	Ghir_A08G023930	21.72	21.58	21.53	27.57	27.52	27.73	Ref	19.93	19.75	19.71	20.22	20.3	20.33
	Ghir_D11G035770	23.65	23.63	23.6	29.5	29.83	29.3	Ref	19.93	19.75	19.71	20.22	20.3	20.33
	Ghir_A11G034930	22.54	22.49	22.6	27.33	27.46	27.3	Ref	19.93	19.75	19.71	20.22	20.3	20.33
	Ghir_D13G004870	22.4	22.3	22.3	27.32	27.5	27.65	Ref	19.93	19.75	19.71	20.22	20.3	20.33
